# Supplementary material for: Retro-2 protects cells from ricin toxicity by inhibiting ASNA1-mediated ER targeting and insertion of tail-anchored proteins
Source: eLife. 2019 Nov 1;8:e48434. doi: 10.7554/eLife.48434 (PMC6858068; doi:10.7554/eLife.48434)
Supplement: Figure 1—source data 1. [file elife-48434-fig1-data1.xlsx]

## Sheet: Legend
	Sheet	Description						Two columns
	T0	Guide counts for T0 sample						Name of guide	Number of counts observed
	Untreated Rep 1	Guide counts for Untreated sample, replicate 1
	Untreated Rep 2	Guide counts for Untreated sample, replicate 2
	Ricin Rep 1	Guide counts for Ricin sample, replicate 1						Naming scheme
	Ricin Rep 2	Guide counts for Ricin sample, replicate 2						Symbol	Add data1	Add data2	Guide ID
	Retro-2 Rep 1	Guide counts for Retro sample, replicate 1
	Retro-2 Rep 2	Guide counts for Retro sample, replicate 2						Guides starting with "0" are negative controls
	Ricin plus Retro-2 Rep 1	Guide counts for Ricin plus Retro-2 Rep 1 sample						"0Safe" and "0None" indicated safe-targeting and non-targeting control respectively
	Ricin plus Retro-2 Rep 2	Guide counts for Ricin plus Retro-2 Rep 2 sample

## Sheet: Retro-2 rep 1
0NONE_na_crispri_205283	2184
0NONE_na_crispri_205288	978
0NONE_na_crispri_205289	1765
0NONE_na_crispri_205291	2213
0NONE_na_crispri_205292	1427
0NONE_na_crispri_205296	1800
0NONE_na_crispri_205298	1864
0NONE_na_crispri_205299	1247
0NONE_na_crispri_205300	1518
0NONE_na_crispri_205301	3455
0NONE_na_crispri_205304	1531
0NONE_na_crispri_205305	1967
0NONE_na_crispri_205308	512
0NONE_na_crispri_205313	2267
0NONE_na_crispri_205320	1334
0NONE_na_crispri_205327	1834
0NONE_na_crispri_205330	1366
0NONE_na_crispri_205334	1827
0NONE_na_crispri_205335	2350
0NONE_na_crispri_205336	2120
0NONE_na_crispri_205338	2123
0NONE_na_crispri_205340	1139
0NONE_na_crispri_205347	2451
0NONE_na_crispri_205348	1655
0NONE_na_crispri_205353	1505
0NONE_na_crispri_205363	2429
0NONE_na_crispri_205364	1535
0NONE_na_crispri_205366	1886
0NONE_na_crispri_205367	2099
0NONE_na_crispri_205369	2030
0NONE_na_crispri_205372	2435
0NONE_na_crispri_205375	1359
0NONE_na_crispri_205376	1240
0NONE_na_crispri_205393	2828
0NONE_na_crispri_205395	1924
0NONE_na_crispri_205399	1939
0NONE_na_crispri_205401	1667
0NONE_na_crispri_205403	1811
0NONE_na_crispri_205408	1688
0NONE_na_crispri_205415	1818
0NONE_na_crispri_205418	1935
0NONE_na_crispri_205420	1068
0NONE_na_crispri_205425	2100
0NONE_na_crispri_205427	1428
0NONE_na_crispri_205436	1974
0NONE_na_crispri_205439	1206
0NONE_na_crispri_205442	1723
0NONE_na_crispri_205446	1113
0NONE_na_crispri_205449	2414
0NONE_na_crispri_205450	931
0NONE_na_crispri_205451	2101
0NONE_na_crispri_205452	1713
0NONE_na_crispri_205458	1833
0NONE_na_crispri_205459	2127
0NONE_na_crispri_205460	2506
0NONE_na_crispri_205463	2273
0NONE_na_crispri_205469	2668
0NONE_na_crispri_205474	353
0NONE_na_crispri_205477	2182
0NONE_na_crispri_205478	1768
0NONE_na_crispri_205479	2103
0NONE_na_crispri_205481	3093
0NONE_na_crispri_205484	2039
0NONE_na_crispri_205498	2493
0NONE_na_crispri_205499	1584
0NONE_na_crispri_205512	1506
0NONE_na_crispri_205513	2621
0NONE_na_crispri_205514	668
0NONE_na_crispri_205524	1167
0NONE_na_crispri_205526	1668
0NONE_na_crispri_205530	1243
0NONE_na_crispri_205537	1184
0NONE_na_crispri_205540	1301
0NONE_na_crispri_205546	27
0NONE_na_crispri_205562	1130
0NONE_na_crispri_205563	2209
0NONE_na_crispri_205565	1686
0NONE_na_crispri_205566	1309
0NONE_na_crispri_205569	1766
0NONE_na_crispri_205576	2462
0NONE_na_crispri_205588	1457
0NONE_na_crispri_205596	2209
0NONE_na_crispri_205605	1678
0NONE_na_crispri_205606	2802
0NONE_na_crispri_205615	3321
0NONE_na_crispri_205619	2560
0NONE_na_crispri_205624	519
0NONE_na_crispri_205635	1590
0NONE_na_crispri_205639	1441
0NONE_na_crispri_205640	1472
0NONE_na_crispri_205647	2903
0NONE_na_crispri_205648	1059
0NONE_na_crispri_205652	1438
0NONE_na_crispri_205654	1609
0NONE_na_crispri_205667	1546
0NONE_na_crispri_205669	2535
0NONE_na_crispri_205670	2154
0NONE_na_crispri_205672	1246
0NONE_na_crispri_205689	2193
0NONE_na_crispri_205690	2356
0NONE_na_crispri_205691	1194
0NONE_na_crispri_205692	1326
0NONE_na_crispri_205695	3012
0NONE_na_crispri_205698	3477
0NONE_na_crispri_205702	1769
0NONE_na_crispri_205704	1166
0NONE_na_crispri_205706	3416
0NONE_na_crispri_205708	2763
0NONE_na_crispri_205709	2005
0NONE_na_crispri_205717	2202
0NONE_na_crispri_205718	1968
0NONE_na_crispri_205723	1614
0NONE_na_crispri_205734	1047
0NONE_na_crispri_205736	1465
0NONE_na_crispri_205739	1085
0NONE_na_crispri_205743	1721
0NONE_na_crispri_205746	3196
0NONE_na_crispri_205749	3216
0NONE_na_crispri_205750	2081
0NONE_na_crispri_205751	1144
0NONE_na_crispri_205759	1069
0NONE_na_crispri_205764	1132
0NONE_na_crispri_205765	1529
0NONE_na_crispri_205769	1792
0NONE_na_crispri_205778	2594
0NONE_na_crispri_205783	1851
0NONE_na_crispri_205784	1564
0NONE_na_crispri_205786	1293
0NONE_na_crispri_205787	1862
0NONE_na_crispri_205789	1729
0NONE_na_crispri_205790	3347
0NONE_na_crispri_205806	1661
0NONE_na_crispri_205807	2340
0NONE_na_crispri_205812	4039
0NONE_na_crispri_205813	1549
0NONE_na_crispri_205814	1275
0NONE_na_crispri_205823	2662
0NONE_na_crispri_205825	2250
0NONE_na_crispri_205827	1395
0NONE_na_crispri_205828	1684
0NONE_na_crispri_205829	2663
0NONE_na_crispri_205830	800
0NONE_na_crispri_205833	1728
0NONE_na_crispri_205840	1220
0NONE_na_crispri_205842	2082
0NONE_na_crispri_205845	1893
0NONE_na_crispri_205855	2172
0NONE_na_crispri_205856	1922
0NONE_na_crispri_205865	1571
0NONE_na_crispri_205866	1697
0NONE_na_crispri_205868	2158
0NONE_na_crispri_205874	1454
0NONE_na_crispri_205875	2812
0NONE_na_crispri_205881	1923
0NONE_na_crispri_205894	2202
0NONE_na_crispri_205897	3005
0NONE_na_crispri_205901	2382
0NONE_na_crispri_205903	2794
0NONE_na_crispri_205906	1599
0NONE_na_crispri_205907	2917
0NONE_na_crispri_205908	2432
0NONE_na_crispri_205909	985
0NONE_na_crispri_205911	974
0NONE_na_crispri_205917	2150
0NONE_na_crispri_205927	1322
0NONE_na_crispri_205933	1519
0NONE_na_crispri_205934	2834
0NONE_na_crispri_205937	1889
0NONE_na_crispri_205947	1590
0NONE_na_crispri_205949	1505
0NONE_na_crispri_205951	1725
0NONE_na_crispri_205955	1885
0NONE_na_crispri_205956	2553
0NONE_na_crispri_205959	1593
0NONE_na_crispri_205961	1278
0NONE_na_crispri_205966	2693
0NONE_na_crispri_205973	172
0NONE_na_crispri_205975	1038
0NONE_na_crispri_205981	2878
0NONE_na_crispri_205984	2147
0NONE_na_crispri_205985	2152
0NONE_na_crispri_205989	1862
0NONE_na_crispri_205990	2080
0NONE_na_crispri_205992	1948
0NONE_na_crispri_205993	1332
0NONE_na_crispri_205994	2639
0NONE_na_crispri_206004	2471
0NONE_na_crispri_206010	1336
0NONE_na_crispri_206014	1974
0NONE_na_crispri_206022	1948
0NONE_na_crispri_206024	1985
0NONE_na_crispri_206027	2372
0NONE_na_crispri_206030	1381
0NONE_na_crispri_206032	1507
0NONE_na_crispri_206037	2096
0NONE_na_crispri_206039	2664
0NONE_na_crispri_206040	1867
0NONE_na_crispri_206047	1121
0NONE_na_crispri_206051	2249
0NONE_na_crispri_206054	1073
0NONE_na_crispri_206056	1267
0NONE_na_crispri_206062	1619
0NONE_na_crispri_206066	1798
0NONE_na_crispri_206077	1610
0NONE_na_crispri_206079	210
0NONE_na_crispri_206086	1663
0NONE_na_crispri_206092	1033
0NONE_na_crispri_206100	1810
0NONE_na_crispri_206101	2483
0NONE_na_crispri_206104	1873
0NONE_na_crispri_206106	1324
0NONE_na_crispri_206107	1429
0NONE_na_crispri_206110	2034
0NONE_na_crispri_206113	1641
0NONE_na_crispri_206114	987
0NONE_na_crispri_206117	1704
0NONE_na_crispri_206119	1229
0NONE_na_crispri_206123	47
0NONE_na_crispri_206124	1963
0NONE_na_crispri_206128	1185
0NONE_na_crispri_206137	1483
0NONE_na_crispri_206139	3286
0NONE_na_crispri_206148	1995
0NONE_na_crispri_206149	939
0NONE_na_crispri_206158	2153
0NONE_na_crispri_206166	2567
0NONE_na_crispri_206167	2547
0NONE_na_crispri_206170	1167
0NONE_na_crispri_206173	2349
0NONE_na_crispri_206175	2569
0NONE_na_crispri_206177	1655
0NONE_na_crispri_206180	1685
0NONE_na_crispri_206188	2652
0NONE_na_crispri_206189	1057
0NONE_na_crispri_206190	2516
0NONE_na_crispri_206191	3075
0NONE_na_crispri_206193	3944
0NONE_na_crispri_206199	1623
0NONE_na_crispri_206212	1955
0NONE_na_crispri_206218	1349
0NONE_na_crispri_206219	551
0NONE_na_crispri_206220	2669
0NONE_na_crispri_206231	1461
0NONE_na_crispri_206233	2180
0NONE_na_crispri_206244	973
0NONE_na_crispri_206245	2594
0NONE_na_crispri_206246	1904
0NONE_na_crispri_206251	1519
0NONE_na_crispri_206252	2650
0NONE_na_crispri_206253	1526
0NONE_na_crispri_206259	1834
0NONE_na_crispri_206262	2098
0NONE_na_crispri_206263	2545
0NONE_na_crispri_206264	2937
0NONE_na_crispri_206274	1390
0NONE_na_crispri_206276	1402
0NONE_na_crispri_206281	1498
0NONE_na_crispri_206284	2739
0NONE_na_crispri_206285	1703
0NONE_na_crispri_206291	1344
0NONE_na_crispri_206292	2452
0NONE_na_crispri_206293	2075
0NONE_na_crispri_206294	1861
0NONE_na_crispri_206296	2810
0NONE_na_crispri_206298	2102
0NONE_na_crispri_206307	1998
0NONE_na_crispri_206310	2188
0NONE_na_crispri_206312	1272
0NONE_na_crispri_206317	1931
0NONE_na_crispri_206319	2515
0NONE_na_crispri_206321	2453
0NONE_na_crispri_206324	2103
0NONE_na_crispri_206331	1986
0NONE_na_crispri_206332	1697
0NONE_na_crispri_206335	1844
0NONE_na_crispri_206336	1181
0NONE_na_crispri_206338	2897
0NONE_na_crispri_206345	1640
0NONE_na_crispri_206346	1532
0NONE_na_crispri_206347	1482
0NONE_na_crispri_206351	1834
0NONE_na_crispri_206353	1739
0NONE_na_crispri_206355	2682
0NONE_na_crispri_206358	1969
0NONE_na_crispri_206361	3115
0NONE_na_crispri_206364	2543
0NONE_na_crispri_206369	1277
0NONE_na_crispri_206370	2694
0NONE_na_crispri_206371	1509
0NONE_na_crispri_206373	2431
0NONE_na_crispri_206374	2107
0NONE_na_crispri_206378	1026
0NONE_na_crispri_206379	2467
0NONE_na_crispri_206383	2659
0NONE_na_crispri_206388	2987
0NONE_na_crispri_206390	2979
0NONE_na_crispri_206392	1810
0NONE_na_crispri_206397	34
0NONE_na_crispri_206398	2415
0NONE_na_crispri_206412	1515
0NONE_na_crispri_206417	2618
0NONE_na_crispri_206425	1925
0NONE_na_crispri_206436	2163
0NONE_na_crispri_206438	1861
0NONE_na_crispri_206439	2184
0NONE_na_crispri_206443	1347
0NONE_na_crispri_206444	1933
0NONE_na_crispri_206449	1885
0NONE_na_crispri_206453	1788
0NONE_na_crispri_206454	2698
0NONE_na_crispri_206457	1881
0NONE_na_crispri_206459	1727
0NONE_na_crispri_206460	2305
0NONE_na_crispri_206462	1427
0NONE_na_crispri_206463	1053
0NONE_na_crispri_206465	1793
0NONE_na_crispri_206466	2350
0NONE_na_crispri_206475	2318
0NONE_na_crispri_206480	1869
0NONE_na_crispri_206481	3043
0NONE_na_crispri_206484	1100
0NONE_na_crispri_206485	2313
0NONE_na_crispri_206486	2662
0NONE_na_crispri_206493	2214
0NONE_na_crispri_206496	1563
0NONE_na_crispri_206500	1594
0NONE_na_crispri_206505	597
0NONE_na_crispri_206506	336
0NONE_na_crispri_206507	2233
0NONE_na_crispri_206514	1417
0NONE_na_crispri_206517	2334
0NONE_na_crispri_206520	744
0NONE_na_crispri_206524	1845
0NONE_na_crispri_206530	1880
0NONE_na_crispri_206534	2155
0NONE_na_crispri_206537	2054
0NONE_na_crispri_206542	1610
0NONE_na_crispri_206549	1773
0NONE_na_crispri_206555	1630
0NONE_na_crispri_206556	2407
0NONE_na_crispri_206558	2134
0NONE_na_crispri_206560	1783
0NONE_na_crispri_206562	4196
0NONE_na_crispri_206567	1701
0NONE_na_crispri_206573	1399
0NONE_na_crispri_206575	1454
0NONE_na_crispri_206579	2521
0NONE_na_crispri_206583	1266
0NONE_na_crispri_206584	2498
0NONE_na_crispri_206585	3572
0NONE_na_crispri_206592	2197
0NONE_na_crispri_206597	2360
0NONE_na_crispri_206598	2699
0NONE_na_crispri_206607	2850
0NONE_na_crispri_206611	55
0NONE_na_crispri_206613	1718
0NONE_na_crispri_206622	1662
0NONE_na_crispri_206625	1520
0NONE_na_crispri_206633	1013
0NONE_na_crispri_206634	2143
0NONE_na_crispri_206639	2974
0NONE_na_crispri_206642	1374
0NONE_na_crispri_206647	2097
0NONE_na_crispri_206652	1647
0NONE_na_crispri_206657	1158
0NONE_na_crispri_206659	1090
0NONE_na_crispri_206667	1976
0NONE_na_crispri_206670	2291
0NONE_na_crispri_206675	1820
0NONE_na_crispri_206681	2731
0NONE_na_crispri_206683	1971
0NONE_na_crispri_206694	1219
0NONE_na_crispri_206695	2721
0NONE_na_crispri_206697	1435
0NONE_na_crispri_206699	849
0NONE_na_crispri_206701	1997
0NONE_na_crispri_206702	1407
0NONE_na_crispri_206704	1965
0NONE_na_crispri_206709	1826
0NONE_na_crispri_206710	676
0NONE_na_crispri_206723	1310
0NONE_na_crispri_206728	1139
0NONE_na_crispri_206729	2000
0NONE_na_crispri_206730	1424
0NONE_na_crispri_206741	2507
0NONE_na_crispri_206754	2072
0NONE_na_crispri_206756	437
0NONE_na_crispri_206757	1278
0NONE_na_crispri_206760	1884
0NONE_na_crispri_206764	1293
0NONE_na_crispri_206765	2791
0NONE_na_crispri_206766	2064
0NONE_na_crispri_206767	1867
0NONE_na_crispri_206773	1780
0NONE_na_crispri_206774	1998
0NONE_na_crispri_206777	1973
0NONE_na_crispri_206778	1285
0NONE_na_crispri_206781	1873
0NONE_na_crispri_206782	562
0NONE_na_crispri_206784	1212
0NONE_na_crispri_206787	777
0NONE_na_crispri_206806	1707
0NONE_na_crispri_206809	2360
0NONE_na_crispri_206812	1730
0NONE_na_crispri_206815	1617
0NONE_na_crispri_206821	2634
0NONE_na_crispri_206822	2674
0NONE_na_crispri_206823	1854
0NONE_na_crispri_206824	3526
0NONE_na_crispri_206825	983
0NONE_na_crispri_206826	831
0NONE_na_crispri_206829	1508
0NONE_na_crispri_206831	1493
0NONE_na_crispri_206834	2043
0NONE_na_crispri_206840	2095
0NONE_na_crispri_206844	2884
0NONE_na_crispri_206848	1887
0NONE_na_crispri_206852	1391
0NONE_na_crispri_206854	3824
0NONE_na_crispri_206856	2273
0NONE_na_crispri_206860	1830
0NONE_na_crispri_206861	2824
0NONE_na_crispri_206862	1647
0NONE_na_crispri_206865	2517
0NONE_na_crispri_206866	2006
0NONE_na_crispri_206869	1628
0NONE_na_crispri_206872	3895
0NONE_na_crispri_206878	981
0NONE_na_crispri_206879	1777
0NONE_na_crispri_206882	3707
0NONE_na_crispri_206885	1769
0NONE_na_crispri_206897	2245
0NONE_na_crispri_206903	2459
0NONE_na_crispri_206904	1542
0NONE_na_crispri_206906	1756
0NONE_na_crispri_206909	1378
0NONE_na_crispri_206910	2960
0NONE_na_crispri_206914	2552
0NONE_na_crispri_206917	573
0NONE_na_crispri_206919	1580
0NONE_na_crispri_206920	2126
0NONE_na_crispri_206923	1624
0NONE_na_crispri_206926	1030
0NONE_na_crispri_206929	1271
0NONE_na_crispri_206933	1425
0NONE_na_crispri_206935	1413
0NONE_na_crispri_206936	1953
0NONE_na_crispri_206938	1432
0NONE_na_crispri_206945	2191
0NONE_na_crispri_206946	2835
0NONE_na_crispri_206947	1731
0NONE_na_crispri_206949	3185
0NONE_na_crispri_206954	2948
0NONE_na_crispri_206956	1590
0NONE_na_crispri_206958	2080
0NONE_na_crispri_206962	2278
0NONE_na_crispri_206963	1259
0NONE_na_crispri_206965	1755
0NONE_na_crispri_206972	2380
0NONE_na_crispri_206976	1755
0NONE_na_crispri_206985	2032
0NONE_na_crispri_206991	1374
0NONE_na_crispri_206992	4253
0NONE_na_crispri_206993	1546
0NONE_na_crispri_207005	1667
0NONE_na_crispri_207007	1362
0NONE_na_crispri_207008	1865
0NONE_na_crispri_207016	3238
0NONE_na_crispri_207019	1704
0NONE_na_crispri_207021	2413
0NONE_na_crispri_207022	1955
0NONE_na_crispri_207029	749
0NONE_na_crispri_207043	1570
0NONE_na_crispri_207044	3608
0NONE_na_crispri_207053	1932
0NONE_na_crispri_207059	1640
0NONE_na_crispri_207063	1969
0NONE_na_crispri_207069	2191
0NONE_na_crispri_207070	1388
0NONE_na_crispri_207074	2089
0NONE_na_crispri_207080	1452
0NONE_na_crispri_207084	1637
0NONE_na_crispri_207090	1745
0NONE_na_crispri_207103	2111
0NONE_na_crispri_207108	2080
0NONE_na_crispri_207110	1884
0NONE_na_crispri_207118	1427
0NONE_na_crispri_207119	2552
0NONE_na_crispri_207126	1572
0NONE_na_crispri_207128	1697
0NONE_na_crispri_207131	1350
0NONE_na_crispri_207132	1456
0NONE_na_crispri_207140	2052
0NONE_na_crispri_207141	1806
0NONE_na_crispri_207144	1980
0NONE_na_crispri_207147	1609
0NONE_na_crispri_207149	1627
0NONE_na_crispri_207154	1042
0NONE_na_crispri_207158	2184
0NONE_na_crispri_207160	1036
0NONE_na_crispri_207162	2005
0NONE_na_crispri_207163	1102
0NONE_na_crispri_207173	2241
0NONE_na_crispri_207183	1871
0NONE_na_crispri_207185	2272
0NONE_na_crispri_207186	1354
0NONE_na_crispri_207187	1345
0NONE_na_crispri_207192	2719
0NONE_na_crispri_207196	1809
0NONE_na_crispri_207200	1390
0NONE_na_crispri_207203	1885
0NONE_na_crispri_207204	1199
0NONE_na_crispri_207206	2600
0NONE_na_crispri_207208	1808
0NONE_na_crispri_207211	3267
0NONE_na_crispri_207212	1476
0NONE_na_crispri_207213	1387
0NONE_na_crispri_207214	1590
0NONE_na_crispri_207215	1001
0NONE_na_crispri_207216	1479
0NONE_na_crispri_207218	1096
0NONE_na_crispri_207219	2905
0NONE_na_crispri_207222	1128
0NONE_na_crispri_207224	1778
0NONE_na_crispri_207225	2172
0NONE_na_crispri_207226	1231
0NONE_na_crispri_207228	793
0NONE_na_crispri_207230	1200
0NONE_na_crispri_207239	2009
0NONE_na_crispri_207245	2094
0NONE_na_crispri_207257	1733
0NONE_na_crispri_207271	1669
0NONE_na_crispri_207272	2486
0NONE_na_crispri_207273	2640
0NONE_na_crispri_207274	850
0NONE_na_crispri_207282	2157
0NONE_na_crispri_207289	1393
0NONE_na_crispri_207297	2609
0NONE_na_crispri_207300	2064
0NONE_na_crispri_207302	1171
0NONE_na_crispri_207305	1621
0NONE_na_crispri_207318	2634
0NONE_na_crispri_207319	807
0NONE_na_crispri_207330	1229
0NONE_na_crispri_207334	2444
0NONE_na_crispri_207338	1158
0NONE_na_crispri_207339	1669
0NONE_na_crispri_207348	1435
0NONE_na_crispri_207351	1691
0NONE_na_crispri_207354	1530
0NONE_na_crispri_207355	3029
0NONE_na_crispri_207356	1540
0NONE_na_crispri_207363	890
0NONE_na_crispri_207366	1292
0NONE_na_crispri_207370	1996
0NONE_na_crispri_207371	995
0NONE_na_crispri_207372	2072
0NONE_na_crispri_207373	1992
0NONE_na_crispri_207375	1845
0NONE_na_crispri_207389	1917
0NONE_na_crispri_207390	2631
0NONE_na_crispri_207394	2753
0NONE_na_crispri_207395	3201
0NONE_na_crispri_207400	1808
0NONE_na_crispri_207406	2349
0NONE_na_crispri_207408	1641
0NONE_na_crispri_207413	2040
0NONE_na_crispri_207427	1632
0NONE_na_crispri_207428	1834
0NONE_na_crispri_207431	1865
0NONE_na_crispri_207432	1429
0NONE_na_crispri_207434	2363
0NONE_na_crispri_207435	2025
0NONE_na_crispri_207437	1764
0NONE_na_crispri_207444	1617
0NONE_na_crispri_207450	3706
0NONE_na_crispri_207452	1514
0NONE_na_crispri_207457	2282
0NONE_na_crispri_207459	2542
0NONE_na_crispri_207461	2379
0NONE_na_crispri_207462	1738
0NONE_na_crispri_207468	1646
0NONE_na_crispri_207471	1703
0NONE_na_crispri_207475	1969
0NONE_na_crispri_207479	2401
0NONE_na_crispri_207482	893
0NONE_na_crispri_207483	1769
0NONE_na_crispri_207487	2286
0NONE_na_crispri_207489	2121
0NONE_na_crispri_207493	2309
0NONE_na_crispri_207494	2060
0NONE_na_crispri_207508	1496
0NONE_na_crispri_207510	2038
0NONE_na_crispri_207511	2157
0NONE_na_crispri_207512	2211
0NONE_na_crispri_207514	2345
0NONE_na_crispri_207516	547
0NONE_na_crispri_207522	846
0NONE_na_crispri_207534	987
0NONE_na_crispri_207542	2552
0NONE_na_crispri_207553	1123
0NONE_na_crispri_207555	2420
0NONE_na_crispri_207560	1938
0NONE_na_crispri_207566	1963
0NONE_na_crispri_207570	2028
0NONE_na_crispri_207571	2608
0NONE_na_crispri_207576	2405
0NONE_na_crispri_207582	2136
0NONE_na_crispri_207589	795
0NONE_na_crispri_207590	1413
0NONE_na_crispri_207597	1745
0NONE_na_crispri_207599	817
0NONE_na_crispri_207602	2235
0NONE_na_crispri_207608	1240
0NONE_na_crispri_207613	2081
0NONE_na_crispri_207614	2587
0NONE_na_crispri_207615	1620
0NONE_na_crispri_207617	1699
0NONE_na_crispri_207618	867
0NONE_na_crispri_207627	2734
0NONE_na_crispri_207631	2440
0NONE_na_crispri_207632	1621
0NONE_na_crispri_207636	1912
0NONE_na_crispri_207637	1154
0NONE_na_crispri_207639	1499
0NONE_na_crispri_207640	1648
0NONE_na_crispri_207641	891
0NONE_na_crispri_207642	1987
0NONE_na_crispri_207643	1812
0NONE_na_crispri_207644	2463
0NONE_na_crispri_207646	1426
0NONE_na_crispri_207647	4278
0NONE_na_crispri_207649	824
0NONE_na_crispri_207655	2574
0NONE_na_crispri_207658	1393
0NONE_na_crispri_207660	1254
0NONE_na_crispri_207662	1589
0NONE_na_crispri_207669	1954
0NONE_na_crispri_207672	2188
0NONE_na_crispri_207673	2296
0NONE_na_crispri_207679	341
0NONE_na_crispri_207684	2595
0NONE_na_crispri_207694	1353
0NONE_na_crispri_207696	1726
0NONE_na_crispri_207704	2713
0NONE_na_crispri_207709	2185
0NONE_na_crispri_207710	2125
0NONE_na_crispri_207711	2392
0NONE_na_crispri_207721	276
0NONE_na_crispri_207728	1486
0NONE_na_crispri_207740	1786
0NONE_na_crispri_207743	2130
0NONE_na_crispri_207744	578
0NONE_na_crispri_207747	1813
0NONE_na_crispri_207753	776
0NONE_na_crispri_207757	2238
0NONE_na_crispri_207771	756
0NONE_na_crispri_207774	332
0NONE_na_crispri_207777	2051
0NONE_na_crispri_207778	1400
0NONE_na_crispri_207780	2063
0NONE_na_crispri_207786	2124
0NONE_na_crispri_207788	2727
0NONE_na_crispri_207789	2185
0NONE_na_crispri_207793	1575
0NONE_na_crispri_207800	2527
0NONE_na_crispri_207803	888
0NONE_na_crispri_207804	2403
0NONE_na_crispri_207805	2089
0NONE_na_crispri_207809	830
0NONE_na_crispri_207813	1586
0NONE_na_crispri_207814	2683
0NONE_na_crispri_207817	2294
0NONE_na_crispri_207819	1576
0NONE_na_crispri_207820	976
0NONE_na_crispri_207821	1598
0NONE_na_crispri_207824	982
0NONE_na_crispri_207830	2279
0NONE_na_crispri_207833	1909
0NONE_na_crispri_207834	1904
0NONE_na_crispri_207837	1490
0NONE_na_crispri_207838	1471
0NONE_na_crispri_207839	1312
0NONE_na_crispri_207843	1250
0NONE_na_crispri_207844	2667
0NONE_na_crispri_207845	2183
0NONE_na_crispri_207852	1790
0NONE_na_crispri_207853	273
0NONE_na_crispri_207857	1811
0NONE_na_crispri_207859	1290
0NONE_na_crispri_207870	2963
0NONE_na_crispri_207874	1340
0NONE_na_crispri_207875	1059
0NONE_na_crispri_207876	1680
0NONE_na_crispri_207878	1194
0NONE_na_crispri_207882	2582
0NONE_na_crispri_207889	2161
0NONE_na_crispri_207891	2038
0NONE_na_crispri_207893	1954
0NONE_na_crispri_207897	2857
0NONE_na_crispri_207900	1930
0NONE_na_crispri_207902	1156
0NONE_na_crispri_207909	1861
0NONE_na_crispri_207912	3384
0NONE_na_crispri_207913	1367
0NONE_na_crispri_207914	1650
0NONE_na_crispri_207915	2486
0NONE_na_crispri_207916	414
0NONE_na_crispri_207917	1494
0NONE_na_crispri_207918	2003
0NONE_na_crispri_207928	1891
0NONE_na_crispri_207931	2872
0NONE_na_crispri_207937	2213
0NONE_na_crispri_207942	2026
0NONE_na_crispri_207944	2621
0NONE_na_crispri_207945	2068
0NONE_na_crispri_207946	1266
0NONE_na_crispri_207948	1957
0NONE_na_crispri_207952	1228
0NONE_na_crispri_207956	1237
0NONE_na_crispri_207958	1658
0NONE_na_crispri_207960	1684
0NONE_na_crispri_207961	2718
0NONE_na_crispri_207971	2038
0NONE_na_crispri_207975	1538
0NONE_na_crispri_207977	2726
0NONE_na_crispri_207978	2090
0NONE_na_crispri_207982	1285
0NONE_na_crispri_207985	2919
0NONE_na_crispri_207991	2710
0NONE_na_crispri_207995	1161
0NONE_na_crispri_208000	1673
0NONE_na_crispri_208003	3346
0NONE_na_crispri_208004	1128
0NONE_na_crispri_208011	2016
0NONE_na_crispri_208016	1222
0NONE_na_crispri_208018	1592
0NONE_na_crispri_208019	3109
0NONE_na_crispri_208020	2128
0NONE_na_crispri_208027	1640
0NONE_na_crispri_208030	1592
0NONE_na_crispri_208040	1976
0NONE_na_crispri_208042	2939
0NONE_na_crispri_208044	1713
0NONE_na_crispri_208045	1378
0NONE_na_crispri_208046	3039
0NONE_na_crispri_208047	1971
0NONE_na_crispri_208050	2185
0NONE_na_crispri_208059	1669
0NONE_na_crispri_208060	1054
0NONE_na_crispri_208063	1415
0NONE_na_crispri_208068	984
0NONE_na_crispri_208069	1733
0NONE_na_crispri_208071	1401
0NONE_na_crispri_208072	2082
0NONE_na_crispri_208081	2483
0NONE_na_crispri_208082	1886
0NONE_na_crispri_208083	3022
0NONE_na_crispri_208085	3040
0NONE_na_crispri_208087	2274
0NONE_na_crispri_208091	2736
0NONE_na_crispri_208092	3181
0NONE_na_crispri_208093	315
0NONE_na_crispri_208103	1902
0NONE_na_crispri_208107	1368
0NONE_na_crispri_208110	3200
0NONE_na_crispri_208118	2522
0NONE_na_crispri_208120	1718
0NONE_na_crispri_208123	1352
0NONE_na_crispri_208127	1803
0NONE_na_crispri_208131	1317
0NONE_na_crispri_208135	1564
0NONE_na_crispri_208138	1737
0NONE_na_crispri_208139	2650
0NONE_na_crispri_208140	1910
0NONE_na_crispri_208142	1498
0NONE_na_crispri_208174	1278
0NONE_na_crispri_208175	1901
0NONE_na_crispri_208177	1038
0NONE_na_crispri_208180	1247
0NONE_na_crispri_208181	1888
0NONE_na_crispri_208184	1568
0NONE_na_crispri_208186	1696
0NONE_na_crispri_208191	1688
0NONE_na_crispri_208198	1381
0NONE_na_crispri_208202	1939
0NONE_na_crispri_208206	630
0NONE_na_crispri_208212	1467
0NONE_na_crispri_208219	1742
0NONE_na_crispri_208224	1702
0NONE_na_crispri_208229	3465
0NONE_na_crispri_208236	1157
0NONE_na_crispri_208237	1626
0NONE_na_crispri_208241	1906
0NONE_na_crispri_208255	2289
0NONE_na_crispri_208259	1523
0NONE_na_crispri_208261	3409
0NONE_na_crispri_208265	1913
0NONE_na_crispri_208267	1738
0NONE_na_crispri_208277	3351
0NONE_na_crispri_208278	2628
0NONE_na_crispri_208279	260
0NONE_na_crispri_208290	3311
0NONE_na_crispri_208294	1720
0NONE_na_crispri_208296	2196
0NONE_na_crispri_208297	2477
0NONE_na_crispri_208301	1520
0NONE_na_crispri_208308	1977
0NONE_na_crispri_208310	2060
0NONE_na_crispri_208313	2419
0NONE_na_crispri_208321	2791
0NONE_na_crispri_208330	1510
0NONE_na_crispri_208331	3002
0NONE_na_crispri_208336	1669
0NONE_na_crispri_208339	1502
0NONE_na_crispri_208342	618
0NONE_na_crispri_208343	1450
0NONE_na_crispri_208345	3447
0NONE_na_crispri_208351	1888
0NONE_na_crispri_208371	1448
0NONE_na_crispri_208377	2708
0NONE_na_crispri_208381	1477
0NONE_na_crispri_208383	936
0NONE_na_crispri_208385	2989
0NONE_na_crispri_208386	1728
0NONE_na_crispri_208396	419
0NONE_na_crispri_208399	1701
0NONE_na_crispri_208403	2116
0NONE_na_crispri_208409	2001
0NONE_na_crispri_208417	2152
0NONE_na_crispri_208429	806
0NONE_na_crispri_208434	2924
0NONE_na_crispri_208440	3028
0NONE_na_crispri_208446	1956
0NONE_na_crispri_208449	2256
0NONE_na_crispri_208455	2826
0NONE_na_crispri_208457	2268
0NONE_na_crispri_208463	2167
0NONE_na_crispri_208464	2488
0NONE_na_crispri_208465	4893
0NONE_na_crispri_208471	2176
0NONE_na_crispri_208473	1914
0NONE_na_crispri_208476	1464
0NONE_na_crispri_208482	1851
0NONE_na_crispri_208485	1383
0NONE_na_crispri_208487	1844
0NONE_na_crispri_208488	1346
0NONE_na_crispri_208490	1659
0NONE_na_crispri_208492	1349
0NONE_na_crispri_208493	1004
0NONE_na_crispri_208495	2157
0NONE_na_crispri_208500	1423
0NONE_na_crispri_208505	1987
0NONE_na_crispri_208514	2177
0NONE_na_crispri_208515	1969
0NONE_na_crispri_208518	1357
0NONE_na_crispri_208521	999
0NONE_na_crispri_208533	184
0NONE_na_crispri_208536	2169
0NONE_na_crispri_208543	3252
0NONE_na_crispri_208546	2475
0NONE_na_crispri_208547	2626
0NONE_na_crispri_208548	652
0NONE_na_crispri_208558	2633
0NONE_na_crispri_208559	2386
0NONE_na_crispri_208560	5652
0NONE_na_crispri_208561	2303
0NONE_na_crispri_208564	2663
0NONE_na_crispri_208565	936
0NONE_na_crispri_208569	1650
0NONE_na_crispri_208572	1875
0NONE_na_crispri_208575	1105
0NONE_na_crispri_208578	1700
0NONE_na_crispri_208588	1840
0NONE_na_crispri_208589	1656
0NONE_na_crispri_208590	2391
0NONE_na_crispri_208608	40
0NONE_na_crispri_208610	2755
0NONE_na_crispri_208615	2694
0NONE_na_crispri_208616	1879
0NONE_na_crispri_208618	3226
0NONE_na_crispri_208619	2265
0NONE_na_crispri_208621	2218
0NONE_na_crispri_208627	1573
0NONE_na_crispri_208629	1372
0NONE_na_crispri_208633	2237
0NONE_na_crispri_208637	1570
0NONE_na_crispri_208640	3128
0NONE_na_crispri_208644	2979
0NONE_na_crispri_208646	1837
0NONE_na_crispri_208650	2698
0NONE_na_crispri_208652	1566
0NONE_na_crispri_208659	1102
0NONE_na_crispri_208660	2552
0NONE_na_crispri_208662	4727
0NONE_na_crispri_208665	2207
0NONE_na_crispri_208671	3425
0NONE_na_crispri_208678	2313
0NONE_na_crispri_208681	1405
0NONE_na_crispri_208685	2379
0NONE_na_crispri_208687	2550
0NONE_na_crispri_208689	1846
0NONE_na_crispri_208691	1416
0NONE_na_crispri_208694	297
0NONE_na_crispri_208700	2119
0NONE_na_crispri_208701	1860
0NONE_na_crispri_208702	2410
0NONE_na_crispri_208703	1260
0NONE_na_crispri_208707	2489
0NONE_na_crispri_208708	2824
0NONE_na_crispri_208715	1103
0NONE_na_crispri_208717	2183
0NONE_na_crispri_208720	1888
0NONE_na_crispri_208724	1908
0NONE_na_crispri_208734	1906
0NONE_na_crispri_208740	1799
0NONE_na_crispri_208747	1367
0NONE_na_crispri_208750	1678
0NONE_na_crispri_208753	1261
0NONE_na_crispri_208756	1045
0NONE_na_crispri_208758	1933
0NONE_na_crispri_208763	1525
0NONE_na_crispri_208766	2033
0NONE_na_crispri_208776	1570
0NONE_na_crispri_208777	2054
0NONE_na_crispri_208791	982
0NONE_na_crispri_208796	2407
0NONE_na_crispri_208799	2985
0NONE_na_crispri_208803	1289
0NONE_na_crispri_208804	1738
0NONE_na_crispri_208805	3096
0NONE_na_crispri_208808	1651
0NONE_na_crispri_208810	2222
0NONE_na_crispri_208812	2797
0NONE_na_crispri_208813	1978
0NONE_na_crispri_208818	1873
0NONE_na_crispri_208819	2123
0NONE_na_crispri_208833	991
0NONE_na_crispri_208834	1377
0NONE_na_crispri_208837	2277
0NONE_na_crispri_208839	2098
0NONE_na_crispri_208842	2646
0NONE_na_crispri_208843	1022
0NONE_na_crispri_208849	1853
0NONE_na_crispri_208850	1098
0NONE_na_crispri_208852	1433
0NONE_na_crispri_208859	1805
0NONE_na_crispri_208861	1501
0NONE_na_crispri_208871	2222
0NONE_na_crispri_208874	1130
0NONE_na_crispri_208877	1839
0NONE_na_crispri_208882	1775
0NONE_na_crispri_208901	2399
0NONE_na_crispri_208902	1867
0NONE_na_crispri_208903	1236
0NONE_na_crispri_208904	2409
0NONE_na_crispri_208906	1931
0NONE_na_crispri_208907	1253
0NONE_na_crispri_208909	1405
0NONE_na_crispri_208910	1700
0NONE_na_crispri_208912	2167
0NONE_na_crispri_208914	933
0NONE_na_crispri_208918	676
0NONE_na_crispri_208926	2684
0NONE_na_crispri_208927	3340
0NONE_na_crispri_208929	1724
0NONE_na_crispri_208931	895
0NONE_na_crispri_208934	287
0NONE_na_crispri_208936	2496
0NONE_na_crispri_208938	1740
0NONE_na_crispri_208944	2409
0NONE_na_crispri_208954	1306
0NONE_na_crispri_208958	1434
0NONE_na_crispri_208963	1727
0NONE_na_crispri_208969	1660
0NONE_na_crispri_208974	2664
0NONE_na_crispri_208977	1721
0NONE_na_crispri_208978	1481
0NONE_na_crispri_208992	1958
0NONE_na_crispri_208996	1574
0NONE_na_crispri_209000	2152
0NONE_na_crispri_209004	3398
0NONE_na_crispri_209006	2693
0NONE_na_crispri_209014	1888
0NONE_na_crispri_209016	1509
0NONE_na_crispri_209018	1443
0NONE_na_crispri_209021	1233
0NONE_na_crispri_209022	1626
0NONE_na_crispri_209027	1773
0NONE_na_crispri_209030	1575
0NONE_na_crispri_209033	2118
0NONE_na_crispri_209034	1290
0NONE_na_crispri_209036	3559
0NONE_na_crispri_209038	2090
0NONE_na_crispri_209042	1506
0NONE_na_crispri_209064	2369
0NONE_na_crispri_209065	2456
0NONE_na_crispri_209068	1610
0Safe_safe_ACOC_204555.4506	2757
0Safe_safe_ACOC_204560.4511	3355
0Safe_safe_ACOC_204571.4522	3081
0Safe_safe_ACOC_204575.4526	735
0Safe_safe_ACOC_204590.4541	1910
0Safe_safe_ACOC_204599.4550	1619
0Safe_safe_ACOC_204608.4559	2127
0Safe_safe_ACOC_204611.4562	2812
0Safe_safe_ACOC_204625.4576	2939
0Safe_safe_ACOC_204627.4578	2409
0Safe_safe_ACOC_204629.4580	2317
0Safe_safe_ACOC_204632.4583	3913
0Safe_safe_ACOC_204663.4614	2580
0Safe_safe_ACOC_204669.4620	1147
0Safe_safe_ACOC_204672.4623	2667
0Safe_safe_ACOC_204678.4629	437
0Safe_safe_ACOC_204679.4630	2345
0Safe_safe_ACOC_204680.4631	2819
0Safe_safe_ACOC_204684.4635	4677
0Safe_safe_ACOC_204715.4666	1961
0Safe_safe_ACOC_204720.4671	3480
0Safe_safe_ACOC_204731.4682	2141
0Safe_safe_ACOC_204737.4688	3315
0Safe_safe_ACOC_204740.4691	2501
0Safe_safe_ACOC_204745.4696	2182
0Safe_safe_ACOC_204746.4697	1707
0Safe_safe_ACOC_204749.4700	1725
0Safe_safe_ACOC_204764.4715	2829
0Safe_safe_ACOC_204770.4721	2970
0Safe_safe_ACOC_204772.4723	3308
0Safe_safe_ACOC_204785.4736	1898
0Safe_safe_ACOC_204788.4739	3896
0Safe_safe_ACOC_204790.4741	2794
0Safe_safe_ACOC_204800.4751	2673
0Safe_safe_ACOC_204802.4753	1874
0Safe_safe_ACOC_204808.4759	1474
0Safe_safe_ACOC_204809.4760	3621
0Safe_safe_ACOC_204825.4776	2636
0Safe_safe_ACOC_204827.4778	2383
0Safe_safe_ACOC_204850.4801	2061
0Safe_safe_ACOC_204854.4805	2173
0Safe_safe_ACOC_204872.4823	1241
0Safe_safe_ACOC_204876.4827	3517
0Safe_safe_ACOC_204877.4828	2794
0Safe_safe_ACOC_204887.4838	2222
0Safe_safe_ACOC_204889.4840	2480
0Safe_safe_ACOC_204891.4842	2334
0Safe_safe_ACOC_204905.4856	1801
0Safe_safe_ACOC_204906.4857	1638
0Safe_safe_ACOC_204910.4861	2396
0Safe_safe_ACOC_204921.4872	3232
0Safe_safe_ACOC_204930.4881	1812
0Safe_safe_ACOC_204934.4885	1939
0Safe_safe_ACOC_204937.4888	1424
0Safe_safe_ACOC_204941.4892	1683
0Safe_safe_ACOC_204947.4898	2425
0Safe_safe_ACOC_204950.4901	2657
0Safe_safe_ACOC_204958.4909	1516
0Safe_safe_ACOC_204960.4911	2496
0Safe_safe_ACOC_204964.4915	3039
0Safe_safe_ACOC_204965.4916	2467
0Safe_safe_ACOC_204975.4926	3208
0Safe_safe_ACOC_205005.4956	2925
0Safe_safe_ACOC_205024.4975	2657
0Safe_safe_ACOC_205030.4981	2393
0Safe_safe_ACOC_205036.4987	2150
0Safe_safe_ACOC_205038.4989	1993
0Safe_safe_ACOC_205049.5000	1961
0Safe_safe_ACOC_205050.5001	3931
0Safe_safe_ACOC_205053.5004	3952
0Safe_safe_ACOC_205060.5011	1800
0Safe_safe_ACOC_205064.5015	2193
0Safe_safe_ACOC_205065.5016	3838
0Safe_safe_ACOC_205066.5017	2633
0Safe_safe_ACOC_205072.5023	2049
0Safe_safe_ACOC_205080.5031	2216
0Safe_safe_ACOC_205084.5035	2751
0Safe_safe_ACOC_205094.5045	1799
0Safe_safe_ACOC_205100.5051	2023
0Safe_safe_ACOC_205107.5058	2250
0Safe_safe_ACOC_205109.5060	2600
0Safe_safe_ACOC_205129.5080	1929
0Safe_safe_ACOC_205133.5084	1744
0Safe_safe_ACOC_205135.5086	2069
0Safe_safe_ACOC_205137.5088	3475
0Safe_safe_ACOC_205139.5090	1853
0Safe_safe_ACOC_205142.5093	3318
0Safe_safe_ACOC_205144.5095	3959
0Safe_safe_ACOC_205150.5101	3014
0Safe_safe_ACOC_205162.5113	2188
0Safe_safe_ACOC_205163.5114	3340
0Safe_safe_ACOC_205174.5125	3440
0Safe_safe_ACOC_205189.5140	2348
0Safe_safe_ACOC_205192.5143	1754
0Safe_safe_ACOC_205196.5147	2851
0Safe_safe_ACOC_205201.5152	2691
0Safe_safe_ACOC_205211.5162	2776
0Safe_safe_ACOC_205221.5172	2339
0Safe_safe_ACOC_205237.5188	2368
0Safe_safe_ACOC_205243.5194	1941
0Safe_safe_ACOC_205250.5201	2152
0Safe_safe_ACOC_205261.5212	2578
0Safe_safe_ACOC_205265.5216	3315
0Safe_safe_ACOC_205270.5221	1633
0Safe_safe_ACOC_205272.5223	2454
0Safe_safe_ACOC_205278.5229	2460
0Safe_safe_ACOC_205285.5236	2454
0Safe_safe_ACOC_205297.5248	2682
0Safe_safe_ACOC_205299.5250	1947
0Safe_safe_DTKP_205310.5261	1776
0Safe_safe_DTKP_205314.5265	2188
0Safe_safe_DTKP_205318.5269	1762
0Safe_safe_DTKP_205319.5270	3172
0Safe_safe_DTKP_205324.5275	2992
0Safe_safe_DTKP_205325.5276	2782
0Safe_safe_DTKP_205340.5291	3025
0Safe_safe_DTKP_205341.5292	2786
0Safe_safe_DTKP_205342.5293	2310
0Safe_safe_DTKP_205343.5294	1526
0Safe_safe_DTKP_205348.5299	1770
0Safe_safe_DTKP_205368.5319	1799
0Safe_safe_DTKP_205373.5324	2631
0Safe_safe_DTKP_205380.5331	3734
0Safe_safe_DTKP_205390.5341	2500
0Safe_safe_DTKP_205391.5342	2024
0Safe_safe_DTKP_205392.5343	2667
0Safe_safe_DTKP_205393.5344	602
0Safe_safe_DTKP_205411.5362	1701
0Safe_safe_DTKP_205422.5373	2188
0Safe_safe_DTKP_205423.5374	2034
0Safe_safe_DTKP_205424.5375	2519
0Safe_safe_DTKP_205448.5399	4156
0Safe_safe_DTKP_205449.5400	3553
0Safe_safe_DTKP_205477.5428	2424
0Safe_safe_DTKP_205480.5431	3075
0Safe_safe_DTKP_205483.5434	1669
0Safe_safe_DTKP_205488.5439	3768
0Safe_safe_DTKP_205490.5441	3615
0Safe_safe_DTKP_205492.5443	1871
0Safe_safe_DTKP_205504.5455	1585
0Safe_safe_DTKP_205505.5456	1791
0Safe_safe_DTKP_205509.5460	2689
0Safe_safe_DTKP_205511.5462	2153
0Safe_safe_DTKP_205513.5464	2180
0Safe_safe_DTKP_205521.5472	2012
0Safe_safe_DTKP_205529.5480	3208
0Safe_safe_DTKP_205533.5484	2644
0Safe_safe_DTKP_205538.5489	2360
0Safe_safe_DTKP_205539.5490	1247
0Safe_safe_DTKP_205542.5493	3054
0Safe_safe_DTKP_205543.5494	3338
0Safe_safe_DTKP_205554.5505	4550
0Safe_safe_DTKP_205556.5507	2842
0Safe_safe_DTKP_205558.5509	2771
0Safe_safe_DTKP_205562.5513	4340
0Safe_safe_DTKP_205563.5514	2299
0Safe_safe_DTKP_205569.5520	1099
0Safe_safe_DTKP_205574.5525	1313
0Safe_safe_DTKP_205581.5532	1356
0Safe_safe_DTKP_205584.5535	2734
0Safe_safe_DTKP_205585.5536	3221
0Safe_safe_DTKP_205591.5542	1952
0Safe_safe_DTKP_205599.5550	2761
0Safe_safe_DTKP_205613.5564	1240
0Safe_safe_DTKP_205620.5571	4255
0Safe_safe_DTKP_205640.5591	1344
0Safe_safe_DTKP_205681.5632	1965
0Safe_safe_DTKP_205686.5637	2729
0Safe_safe_DTKP_205711.5662	2807
0Safe_safe_DTKP_205718.5669	3736
0Safe_safe_DTKP_205723.5674	1443
0Safe_safe_DTKP_205727.5678	1544
0Safe_safe_DTKP_205733.5684	2174
0Safe_safe_DTKP_205749.5700	2330
0Safe_safe_DTKP_205753.5704	3461
0Safe_safe_DTKP_205761.5712	2079
0Safe_safe_DTKP_205768.5719	3485
0Safe_safe_DTKP_205774.5725	2450
0Safe_safe_DTKP_205778.5729	2129
0Safe_safe_DTKP_205789.5740	2891
0Safe_safe_DTKP_205790.5741	1612
0Safe_safe_DTKP_205794.5745	3936
0Safe_safe_DTKP_205803.5754	1781
0Safe_safe_DTKP_205818.5769	1809
0Safe_safe_DTKP_205820.5771	2308
0Safe_safe_DTKP_205822.5773	935
0Safe_safe_DTKP_205839.5790	3365
0Safe_safe_DTKP_205872.5823	2356
0Safe_safe_DTKP_205877.5828	1944
0Safe_safe_DTKP_205884.5835	2647
0Safe_safe_DTKP_205900.5851	2674
0Safe_safe_DTKP_205926.5877	2168
0Safe_safe_DTKP_205940.5891	2131
0Safe_safe_DTKP_205944.5895	2124
0Safe_safe_DTKP_205950.5901	4424
0Safe_safe_DTKP_205963.5914	3590
0Safe_safe_DTKP_205983.5934	2544
0Safe_safe_DTKP_205986.5937	3482
0Safe_safe_DTKP_205988.5939	2751
0Safe_safe_DTKP_205992.5943	1592
0Safe_safe_DTKP_205998.5949	1487
0Safe_safe_DTKP_206016.5967	2390
0Safe_safe_DTKP_206017.5968	2016
0Safe_safe_DTKP_206021.5972	2525
0Safe_safe_DTKP_206023.5974	2487
0Safe_safe_DTKP_206030.5981	1921
0Safe_safe_DTKP_206036.5987	2632
0Safe_safe_DTKP_206045.5996	3140
0Safe_safe_DTKP_206046.5997	3457
0Safe_safe_GEEX_206053.1504	2408
0Safe_safe_GEEX_206056.1507	3761
0Safe_safe_GEEX_206061.1512	3114
0Safe_safe_GEEX_206067.1518	3567
0Safe_safe_GEEX_206081.1532	3152
0Safe_safe_GEEX_206095.1546	2037
0Safe_safe_GEEX_206113.1564	1052
0Safe_safe_GEEX_206119.1570	2111
0Safe_safe_GEEX_206123.1574	1983
0Safe_safe_GEEX_206125.1576	1601
0Safe_safe_GEEX_206126.1577	3499
0Safe_safe_GEEX_206141.1592	3401
0Safe_safe_GEEX_206146.1597	3360
0Safe_safe_GEEX_206147.1598	2660
0Safe_safe_GEEX_206148.1599	2505
0Safe_safe_GEEX_206149.1600	1914
0Safe_safe_GEEX_206154.1605	2219
0Safe_safe_GEEX_206155.1606	904
0Safe_safe_GEEX_206156.1607	2597
0Safe_safe_GEEX_206164.1615	3896
0Safe_safe_GEEX_206167.1618	3640
0Safe_safe_GEEX_206170.1621	2779
0Safe_safe_GEEX_206192.1643	2732
0Safe_safe_GEEX_206199.1650	2579
0Safe_safe_GEEX_206206.1657	2067
0Safe_safe_GEEX_206210.1661	2483
0Safe_safe_GEEX_206217.1668	3530
0Safe_safe_GEEX_206232.1683	2698
0Safe_safe_GEEX_206235.1686	3954
0Safe_safe_GEEX_206236.1687	1735
0Safe_safe_GEEX_206238.1689	3198
0Safe_safe_GEEX_206242.1693	1043
0Safe_safe_GEEX_206243.1694	2903
0Safe_safe_GEEX_206251.1702	2273
0Safe_safe_GEEX_206253.1704	2925
0Safe_safe_GEEX_206254.1705	1912
0Safe_safe_GEEX_206258.1709	2241
0Safe_safe_GEEX_206259.1710	1898
0Safe_safe_GEEX_206268.1719	3157
0Safe_safe_GEEX_206273.1724	2767
0Safe_safe_GEEX_206276.1727	1849
0Safe_safe_GEEX_206290.1741	1979
0Safe_safe_GEEX_206293.1744	3929
0Safe_safe_GEEX_206294.1745	2039
0Safe_safe_GEEX_206301.1752	2291
0Safe_safe_GEEX_206305.1756	3919
0Safe_safe_GEEX_206311.1762	1379
0Safe_safe_GEEX_206321.1772	1874
0Safe_safe_GEEX_206325.1776	3371
0Safe_safe_GEEX_206329.1780	2519
0Safe_safe_GEEX_206335.1786	1666
0Safe_safe_GEEX_206336.1787	2935
0Safe_safe_GEEX_206338.1789	2159
0Safe_safe_GEEX_206346.1797	1632
0Safe_safe_GEEX_206352.1803	3413
0Safe_safe_GEEX_206359.1810	2026
0Safe_safe_GEEX_206374.1825	1818
0Safe_safe_GEEX_206375.1826	3273
0Safe_safe_GEEX_206383.1834	2812
0Safe_safe_GEEX_206391.1842	2269
0Safe_safe_GEEX_206394.1845	3521
0Safe_safe_GEEX_206399.1850	3843
0Safe_safe_GEEX_206400.1851	2204
0Safe_safe_GEEX_206405.1856	4296
0Safe_safe_GEEX_206411.1862	3301
0Safe_safe_GEEX_206415.1866	1777
0Safe_safe_GEEX_206417.1868	2068
0Safe_safe_GEEX_206421.1872	3037
0Safe_safe_GEEX_206440.1891	3658
0Safe_safe_GEEX_206443.1894	4820
0Safe_safe_GEEX_206445.1896	3417
0Safe_safe_GEEX_206451.1902	2535
0Safe_safe_GEEX_206463.1914	2481
0Safe_safe_GEEX_206501.1952	3482
0Safe_safe_GEEX_206502.1953	2776
0Safe_safe_GEEX_206507.1958	2866
0Safe_safe_GEEX_206510.1961	762
0Safe_safe_GEEX_206522.1973	1871
0Safe_safe_GEEX_206526.1977	2461
0Safe_safe_GEEX_206530.1981	1917
0Safe_safe_GEEX_206541.1992	2273
0Safe_safe_GEEX_206547.1998	2951
0Safe_safe_GEEX_206551.2002	3362
0Safe_safe_GEEX_206552.2003	1630
0Safe_safe_GEEX_206553.2004	3091
0Safe_safe_GEEX_206557.2008	2699
0Safe_safe_GEEX_206565.2016	1486
0Safe_safe_GEEX_206580.2031	3144
0Safe_safe_GEEX_206583.2034	3769
0Safe_safe_GEEX_206585.2036	2405
0Safe_safe_GEEX_206587.2038	3395
0Safe_safe_GEEX_206588.2039	2517
0Safe_safe_GEEX_206597.2048	2815
0Safe_safe_GEEX_206613.2064	1306
0Safe_safe_GEEX_206626.2077	4190
0Safe_safe_GEEX_206642.2093	1310
0Safe_safe_GEEX_206648.2099	1792
0Safe_safe_GEEX_206649.2100	1970
0Safe_safe_GEEX_206676.2127	3498
0Safe_safe_GEEX_206685.2136	2632
0Safe_safe_GEEX_206705.2156	2560
0Safe_safe_GEEX_206720.2171	1884
0Safe_safe_GEEX_206730.2181	2049
0Safe_safe_GEEX_206731.2182	2063
0Safe_safe_GEEX_206743.2194	1799
0Safe_safe_GEEX_206747.2198	1633
0Safe_safe_GEEX_206753.2204	1693
0Safe_safe_GEEX_206760.2211	3271
0Safe_safe_GEEX_206774.2225	2322
0Safe_safe_GEEX_206778.2229	1131
0Safe_safe_GEEX_206781.2232	3544
0Safe_safe_GEEX_206784.2235	2071
0Safe_safe_GEEX_206792.2243	2869
0Safe_safe_GEEX_206793.2244	2364
0Safe_safe_MEPR_206803.1003	2552
0Safe_safe_MEPR_206804.1004	2205
0Safe_safe_MEPR_206807.1007	1798
0Safe_safe_MEPR_206810.1010	2075
0Safe_safe_MEPR_206814.1014	3391
0Safe_safe_MEPR_206826.1026	3826
0Safe_safe_MEPR_206827.1027	2947
0Safe_safe_MEPR_206843.1043	2270
0Safe_safe_MEPR_206857.1057	3402
0Safe_safe_MEPR_206859.1059	3666
0Safe_safe_MEPR_206869.1069	2397
0Safe_safe_MEPR_206870.1070	1916
0Safe_safe_MEPR_206876.1076	2076
0Safe_safe_MEPR_206891.1091	2691
0Safe_safe_MEPR_206892.1092	3294
0Safe_safe_MEPR_206896.1096	1438
0Safe_safe_MEPR_206901.1101	2855
0Safe_safe_MEPR_206914.1114	1916
0Safe_safe_MEPR_206916.1116	1879
0Safe_safe_MEPR_206918.1118	1986
0Safe_safe_MEPR_206921.1121	2598
0Safe_safe_MEPR_206930.1130	1172
0Safe_safe_MEPR_206935.1135	3184
0Safe_safe_MEPR_206938.1138	2802
0Safe_safe_MEPR_206951.1151	3734
0Safe_safe_MEPR_206960.1160	2335
0Safe_safe_MEPR_206961.1161	1306
0Safe_safe_MEPR_206965.1165	2902
0Safe_safe_MEPR_206968.1168	1222
0Safe_safe_MEPR_206970.1170	3810
0Safe_safe_MEPR_206976.1176	2852
0Safe_safe_MEPR_206979.1179	2281
0Safe_safe_MEPR_206983.1183	2309
0Safe_safe_MEPR_206989.1189	1743
0Safe_safe_MEPR_207012.1212	2872
0Safe_safe_MEPR_207015.1215	2247
0Safe_safe_MEPR_207019.1219	2519
0Safe_safe_MEPR_207025.1225	1408
0Safe_safe_MEPR_207028.1228	2955
0Safe_safe_MEPR_207030.1230	492
0Safe_safe_MEPR_207031.1231	2352
0Safe_safe_MEPR_207036.1236	3200
0Safe_safe_MEPR_207037.1237	1964
0Safe_safe_MEPR_207042.1242	1460
0Safe_safe_MEPR_207045.1245	2937
0Safe_safe_MEPR_207057.1257	3178
0Safe_safe_MEPR_207060.1260	3108
0Safe_safe_MEPR_207070.1270	1723
0Safe_safe_MEPR_207071.1271	1842
0Safe_safe_MEPR_207073.1273	1843
0Safe_safe_MEPR_207101.1301	1099
0Safe_safe_MEPR_207106.1306	802
0Safe_safe_MEPR_207108.1308	2516
0Safe_safe_MEPR_207112.1312	1515
0Safe_safe_MEPR_207133.1333	2059
0Safe_safe_MEPR_207148.1348	3744
0Safe_safe_MEPR_207151.1351	3055
0Safe_safe_MEPR_207158.1358	1832
0Safe_safe_MEPR_207162.1362	1567
0Safe_safe_MEPR_207168.1368	2889
0Safe_safe_MEPR_207169.1369	1467
0Safe_safe_MEPR_207173.1373	1733
0Safe_safe_MEPR_207175.1375	1279
0Safe_safe_MEPR_207181.1381	3072
0Safe_safe_MEPR_207196.1396	4760
0Safe_safe_MEPR_207198.1398	3309
0Safe_safe_MEPR_207203.1403	2351
0Safe_safe_MEPR_207215.1415	2076
0Safe_safe_MEPR_207254.1454	2797
0Safe_safe_MEPR_207260.1460	2211
0Safe_safe_MEPR_207271.1471	3061
0Safe_safe_MEPR_207273.1473	2720
0Safe_safe_MEPR_207276.1476	3059
0Safe_safe_MEPR_207297.1497	955
0Safe_safe_MEPR_207300.1500	4062
0Safe_safe_MEPR_207304.754	3186
0Safe_safe_MEPR_207323.773	2568
0Safe_safe_MEPR_207325.775	4410
0Safe_safe_MEPR_207329.779	3465
0Safe_safe_MEPR_207331.781	2586
0Safe_safe_MEPR_207334.784	2286
0Safe_safe_MEPR_207339.789	376
0Safe_safe_MEPR_207347.797	2234
0Safe_safe_MEPR_207348.798	2593
0Safe_safe_MEPR_207351.801	1232
0Safe_safe_MEPR_207381.831	1116
0Safe_safe_MEPR_207386.836	1447
0Safe_safe_MEPR_207387.837	3478
0Safe_safe_MEPR_207389.839	4223
0Safe_safe_MEPR_207392.842	2260
0Safe_safe_MEPR_207397.847	3042
0Safe_safe_MEPR_207402.852	3783
0Safe_safe_MEPR_207413.863	2251
0Safe_safe_MEPR_207414.864	2574
0Safe_safe_MEPR_207429.879	3841
0Safe_safe_MEPR_207454.904	2837
0Safe_safe_MEPR_207455.905	2059
0Safe_safe_MEPR_207456.906	1176
0Safe_safe_MEPR_207462.912	4429
0Safe_safe_MEPR_207467.917	2606
0Safe_safe_MEPR_207471.921	1966
0Safe_safe_MEPR_207478.928	3121
0Safe_safe_MEPR_207481.931	1116
0Safe_safe_MEPR_207484.934	1429
0Safe_safe_MEPR_207486.936	1059
0Safe_safe_MEPR_207487.937	1799
0Safe_safe_MEPR_207488.938	2198
0Safe_safe_MEPR_207490.940	1084
0Safe_safe_MEPR_207491.941	1743
0Safe_safe_MEPR_207494.944	1540
0Safe_safe_MEPR_207495.945	1330
0Safe_safe_MEPR_207497.947	1579
0Safe_safe_MEPR_207500.950	3622
0Safe_safe_MEPR_207502.952	2776
0Safe_safe_MEPR_207518.968	1448
0Safe_safe_MEPR_207534.984	3041
0Safe_safe_MEPR_207542.992	2844
0Safe_safe_MEPR_207544.994	2189
0Safe_safe_PROT_207550.2251	3773
0Safe_safe_PROT_207553.2254	2310
0Safe_safe_PROT_207554.2255	1988
0Safe_safe_PROT_207559.2260	1047
0Safe_safe_PROT_207566.2267	2588
0Safe_safe_PROT_207578.2279	2739
0Safe_safe_PROT_207581.2282	2423
0Safe_safe_PROT_207597.2298	1957
0Safe_safe_PROT_207600.2301	1852
0Safe_safe_PROT_207604.2305	2628
0Safe_safe_PROT_207605.2306	3760
0Safe_safe_PROT_207610.2311	1184
0Safe_safe_PROT_207611.2312	2327
0Safe_safe_PROT_207617.2318	1940
0Safe_safe_PROT_207628.2329	1887
0Safe_safe_PROT_207631.2332	2494
0Safe_safe_PROT_207634.2335	2232
0Safe_safe_PROT_207643.2344	3298
0Safe_safe_PROT_207645.2346	2765
0Safe_safe_PROT_207653.2354	3316
0Safe_safe_PROT_207662.2363	3854
0Safe_safe_PROT_207675.2376	2467
0Safe_safe_PROT_207698.2399	2329
0Safe_safe_PROT_207700.2401	4174
0Safe_safe_PROT_207702.2403	1601
0Safe_safe_PROT_207703.2404	2315
0Safe_safe_PROT_207730.2431	2575
0Safe_safe_PROT_207734.2435	2288
0Safe_safe_PROT_207736.2437	2887
0Safe_safe_PROT_207737.2438	4411
0Safe_safe_PROT_207739.2440	1547
0Safe_safe_PROT_207741.2442	1467
0Safe_safe_PROT_207786.2487	2644
0Safe_safe_PROT_207794.2495	433
0Safe_safe_PROT_207801.2502	1071
0Safe_safe_PROT_207802.2503	3346
0Safe_safe_PROT_207827.2528	2498
0Safe_safe_PROT_207833.2534	1980
0Safe_safe_PROT_207836.2537	1270
0Safe_safe_PROT_207841.2542	1772
0Safe_safe_PROT_207844.2545	3707
0Safe_safe_PROT_207847.2548	2355
0Safe_safe_PROT_207854.2555	2769
0Safe_safe_PROT_207862.2563	2600
0Safe_safe_PROT_207863.2564	2522
0Safe_safe_PROT_207876.2577	1617
0Safe_safe_PROT_207878.2579	3462
0Safe_safe_PROT_207887.2588	1375
0Safe_safe_PROT_207896.2597	2013
0Safe_safe_PROT_207901.2602	1550
0Safe_safe_PROT_207908.2609	1643
0Safe_safe_PROT_207912.2613	3323
0Safe_safe_PROT_207914.2615	2601
0Safe_safe_PROT_207916.2617	2101
0Safe_safe_PROT_207926.2627	2452
0Safe_safe_PROT_207928.2629	1949
0Safe_safe_PROT_207931.2632	2537
0Safe_safe_PROT_207932.2633	2298
0Safe_safe_PROT_207933.2634	4461
0Safe_safe_PROT_207936.2637	2460
0Safe_safe_PROT_207937.2638	1831
0Safe_safe_PROT_207949.2650	2130
0Safe_safe_PROT_207952.2653	1721
0Safe_safe_PROT_207960.2661	3215
0Safe_safe_PROT_207962.2663	2271
0Safe_safe_PROT_207973.2674	2468
0Safe_safe_PROT_207980.2681	5077
0Safe_safe_PROT_207983.2684	2570
0Safe_safe_PROT_207986.2687	3839
0Safe_safe_PROT_207990.2691	3241
0Safe_safe_PROT_207992.2693	2717
0Safe_safe_PROT_208008.2709	1750
0Safe_safe_PROT_208009.2710	2256
0Safe_safe_PROT_208013.2714	3463
0Safe_safe_PROT_208021.2722	1901
0Safe_safe_PROT_208030.2731	2150
0Safe_safe_PROT_208031.2732	2609
0Safe_safe_PROT_208032.2733	2339
0Safe_safe_PROT_208035.2736	3071
0Safe_safe_PROT_208041.2742	1971
0Safe_safe_PROT_208044.2745	2657
0Safe_safe_PROT_208046.2747	1958
0Safe_safe_PROT_208050.2751	1956
0Safe_safe_PROT_208051.2752	2625
0Safe_safe_PROT_208054.2755	2222
0Safe_safe_PROT_208062.2763	3237
0Safe_safe_PROT_208082.2783	589
0Safe_safe_PROT_208086.2787	3194
0Safe_safe_PROT_208087.2788	4071
0Safe_safe_PROT_208095.2796	3744
0Safe_safe_PROT_208096.2797	1264
0Safe_safe_PROT_208101.2802	4008
0Safe_safe_PROT_208106.2807	2029
0Safe_safe_PROT_208111.2812	2353
0Safe_safe_PROT_208127.2828	4387
0Safe_safe_PROT_208148.2849	2331
0Safe_safe_PROT_208165.2866	2940
0Safe_safe_PROT_208166.2867	2239
0Safe_safe_PROT_208174.2875	2118
0Safe_safe_PROT_208177.2878	2737
0Safe_safe_PROT_208180.2881	2780
0Safe_safe_PROT_208181.2882	2197
0Safe_safe_PROT_208190.2891	1625
0Safe_safe_PROT_208213.2914	2149
0Safe_safe_PROT_208219.2920	3065
0Safe_safe_PROT_208220.2921	1461
0Safe_safe_PROT_208222.2923	4410
0Safe_safe_PROT_208232.2933	1792
0Safe_safe_PROT_208233.2934	3605
0Safe_safe_PROT_208235.2936	2155
0Safe_safe_PROT_208237.2938	4969
0Safe_safe_PROT_208247.2948	3362
0Safe_safe_PROT_208248.2949	1708
0Safe_safe_PROT_208262.2963	1987
0Safe_safe_PROT_208263.2964	3385
0Safe_safe_PROT_208267.2968	2488
0Safe_safe_PROT_208268.2969	2297
0Safe_safe_PROT_208269.2970	2664
0Safe_safe_PROT_208276.2977	2358
0Safe_safe_PROT_208288.2989	3462
0Safe_safe_PROT_208299.3000	3414
0Safe_safe_TMMO_208300.1	1602
0Safe_safe_TMMO_208309.107	3610
0Safe_safe_TMMO_208317.114	3985
0Safe_safe_TMMO_208324.120	3441
0Safe_safe_TMMO_208335.130	2497
0Safe_safe_TMMO_208340.135	2660
0Safe_safe_TMMO_208349.143	2632
0Safe_safe_TMMO_208368.160	4312
0Safe_safe_TMMO_208381.172	1818
0Safe_safe_TMMO_208382.173	2748
0Safe_safe_TMMO_208393.183	1982
0Safe_safe_TMMO_208399.189	3241
0Safe_safe_TMMO_208401.190	2649
0Safe_safe_TMMO_208403.192	3104
0Safe_safe_TMMO_208410.199	1684
0Safe_safe_TMMO_208416.203	2207
0Safe_safe_TMMO_208429.215	955
0Safe_safe_TMMO_208438.223	2815
0Safe_safe_TMMO_208439.224	4177
0Safe_safe_TMMO_208451.235	2960
0Safe_safe_TMMO_208454.238	1939
0Safe_safe_TMMO_208475.257	2299
0Safe_safe_TMMO_208485.266	1411
0Safe_safe_TMMO_208492.272	2898
0Safe_safe_TMMO_208506.285	3290
0Safe_safe_TMMO_208531.307	2115
0Safe_safe_TMMO_208535.310	1443
0Safe_safe_TMMO_208541.316	2343
0Safe_safe_TMMO_208549.323	3781
0Safe_safe_TMMO_208574.346	2376
0Safe_safe_TMMO_208576.348	4452
0Safe_safe_TMMO_208577.349	2487
0Safe_safe_TMMO_208582.353	3145
0Safe_safe_TMMO_208583.354	3289
0Safe_safe_TMMO_208590.360	2807
0Safe_safe_TMMO_208611.38	1875
0Safe_safe_TMMO_208614.382	1478
0Safe_safe_TMMO_208616.384	3001
0Safe_safe_TMMO_208618.386	1593
0Safe_safe_TMMO_208628.395	3289
0Safe_safe_TMMO_208630.397	1280
0Safe_safe_TMMO_208631.398	3486
0Safe_safe_TMMO_208634.40	1330
0Safe_safe_TMMO_208649.413	2116
0Safe_safe_TMMO_208654.418	2651
0Safe_safe_TMMO_208657.420	1673
0Safe_safe_TMMO_208677.439	2353
0Safe_safe_TMMO_208691.451	1952
0Safe_safe_TMMO_208697.457	2918
0Safe_safe_TMMO_208704.463	2234
0Safe_safe_TMMO_208707.466	360
0Safe_safe_TMMO_208710.469	1895
0Safe_safe_TMMO_208724.481	2119
0Safe_safe_TMMO_208726.483	3258
0Safe_safe_TMMO_208727.484	1981
0Safe_safe_TMMO_208730.487	2504
0Safe_safe_TMMO_208735.491	2359
0Safe_safe_TMMO_208737.493	3483
0Safe_safe_TMMO_208739.495	796
0Safe_safe_TMMO_208756.51	3197
0Safe_safe_TMMO_208773.525	3271
0Safe_safe_TMMO_208778.53	3199
0Safe_safe_TMMO_208786.537	2305
0Safe_safe_TMMO_208793.543	2710
0Safe_safe_TMMO_208794.544	1647
0Safe_safe_TMMO_208799.549	2485
0Safe_safe_TMMO_208802.551	1565
0Safe_safe_TMMO_208805.554	3085
0Safe_safe_TMMO_208812.560	2488
0Safe_safe_TMMO_208831.578	2086
0Safe_safe_TMMO_208832.579	2772
0Safe_safe_TMMO_208854.599	3082
0Safe_safe_TMMO_208867.61	3920
0Safe_safe_TMMO_208868.610	2366
0Safe_safe_TMMO_208882.623	2325
0Safe_safe_TMMO_208886.627	2793
0Safe_safe_TMMO_208911.65	2214
0Safe_safe_TMMO_208913.651	3023
0Safe_safe_TMMO_208917.655	3114
0Safe_safe_TMMO_208918.656	3790
0Safe_safe_TMMO_208919.657	1032
0Safe_safe_TMMO_208926.663	4582
0Safe_safe_TMMO_208939.675	3647
0Safe_safe_TMMO_208947.682	2339
0Safe_safe_TMMO_208958.692	2181
0Safe_safe_TMMO_208962.696	2394
0Safe_safe_TMMO_208963.697	1343
0Safe_safe_TMMO_208980.711	2357
0Safe_safe_TMMO_208983.714	2443
0Safe_safe_TMMO_208990.720	2589
0Safe_safe_TMMO_208993.723	2343
0Safe_safe_TMMO_208997.727	1978
0Safe_safe_TMMO_209005.734	1481
0Safe_safe_TMMO_209012.740	1994
0Safe_safe_TMMO_209013.741	2387
0Safe_safe_TMMO_209016.744	2051
0Safe_safe_TMMO_209019.747	2896
0Safe_safe_TMMO_209022.75	2464
0Safe_safe_TMMO_209024.76	3408
0Safe_safe_TMMO_209025.77	2698
0Safe_safe_TMMO_209031.82	2452
0Safe_safe_TMMO_209036.87	806
0Safe_safe_TMMO_209039.9	2706
0Safe_safe_TMMO_209043.93	2067
0Safe_safe_UNA1_209066.3767	3045
0Safe_safe_UNA1_209072.3773	2863
0Safe_safe_UNA1_209089.3790	2626
0Safe_safe_UNA1_209095.3796	2710
0Safe_safe_UNA1_209107.3808	3022
0Safe_safe_UNA1_209114.3815	2257
0Safe_safe_UNA1_209119.3820	2206
0Safe_safe_UNA1_209126.3827	1936
0Safe_safe_UNA1_209127.3828	2200
0Safe_safe_UNA1_209137.3838	1318
0Safe_safe_UNA1_209150.3851	1850
0Safe_safe_UNA1_209153.3854	3154
0Safe_safe_UNA1_209162.3863	2879
0Safe_safe_UNA1_209166.3867	3887
0Safe_safe_UNA1_209181.3882	1975
0Safe_safe_UNA1_209182.3883	1464
0Safe_safe_UNA1_209187.3888	1776
0Safe_safe_UNA1_209191.3892	2266
0Safe_safe_UNA1_209192.3893	1955
0Safe_safe_UNA1_209194.3895	2084
0Safe_safe_UNA1_209198.3899	2247
0Safe_safe_UNA1_209205.3906	3756
0Safe_safe_UNA1_209206.3907	1567
0Safe_safe_UNA1_209208.3909	3573
0Safe_safe_UNA1_209212.3913	3191
0Safe_safe_UNA1_209217.3918	96
0Safe_safe_UNA1_209218.3919	1290
0Safe_safe_UNA1_209236.3937	4435
0Safe_safe_UNA1_209245.3946	2463
0Safe_safe_UNA1_209266.3967	4474
0Safe_safe_UNA1_209280.3981	1893
0Safe_safe_UNA1_209283.3984	2182
0Safe_safe_UNA1_209289.3990	2760
0Safe_safe_UNA1_209292.3993	1683
0Safe_safe_UNA1_209294.3995	3339
0Safe_safe_UNA1_209313.4014	2565
0Safe_safe_UNA1_209320.4021	3221
0Safe_safe_UNA1_209331.4032	2992
0Safe_safe_UNA1_209340.4041	2564
0Safe_safe_UNA1_209344.4045	3979
0Safe_safe_UNA1_209349.4050	1897
0Safe_safe_UNA1_209352.4053	2904
0Safe_safe_UNA1_209353.4054	2621
0Safe_safe_UNA1_209355.4056	851
0Safe_safe_UNA1_209358.4059	1903
0Safe_safe_UNA1_209365.4066	1936
0Safe_safe_UNA1_209366.4067	1794
0Safe_safe_UNA1_209372.4073	1384
0Safe_safe_UNA1_209373.4074	2557
0Safe_safe_UNA1_209380.4081	4251
0Safe_safe_UNA1_209387.4088	2572
0Safe_safe_UNA1_209411.4112	2464
0Safe_safe_UNA1_209413.4114	3506
0Safe_safe_UNA1_209424.4125	2790
0Safe_safe_UNA1_209433.4134	1853
0Safe_safe_UNA1_209436.4137	2282
0Safe_safe_UNA1_209441.4142	2601
0Safe_safe_UNA1_209445.4146	1807
0Safe_safe_UNA1_209446.4147	2440
0Safe_safe_UNA1_209464.4165	770
0Safe_safe_UNA1_209467.4168	2733
0Safe_safe_UNA1_209471.4172	1219
0Safe_safe_UNA1_209473.4174	2189
0Safe_safe_UNA1_209474.4175	2317
0Safe_safe_UNA1_209477.4178	3208
0Safe_safe_UNA1_209479.4180	2148
0Safe_safe_UNA1_209485.4186	2157
0Safe_safe_UNA1_209487.4188	2238
0Safe_safe_UNA1_209508.4209	2274
0Safe_safe_UNA1_209510.4211	2375
0Safe_safe_UNA1_209513.4214	1974
0Safe_safe_UNA1_209517.4218	3692
0Safe_safe_UNA1_209523.4224	1636
0Safe_safe_UNA1_209524.4225	2756
0Safe_safe_UNA1_209525.4226	2772
0Safe_safe_UNA1_209533.4234	3033
0Safe_safe_UNA1_209546.4247	3104
0Safe_safe_UNA1_209548.4249	1832
0Safe_safe_UNA1_209564.4265	3164
0Safe_safe_UNA1_209580.4281	3360
0Safe_safe_UNA1_209583.4284	3305
0Safe_safe_UNA1_209591.4292	1024
0Safe_safe_UNA1_209595.4296	1782
0Safe_safe_UNA1_209603.4304	1586
0Safe_safe_UNA1_209608.4309	2621
0Safe_safe_UNA1_209612.4313	2975
0Safe_safe_UNA1_209627.4328	2395
0Safe_safe_UNA1_209631.4332	2491
0Safe_safe_UNA1_209633.4334	1397
0Safe_safe_UNA1_209639.4340	3712
0Safe_safe_UNA1_209642.4343	3386
0Safe_safe_UNA1_209645.4346	2480
0Safe_safe_UNA1_209646.4347	2901
0Safe_safe_UNA1_209661.4362	1710
0Safe_safe_UNA1_209678.4379	2780
0Safe_safe_UNA1_209684.4385	1662
0Safe_safe_UNA1_209685.4386	2803
0Safe_safe_UNA1_209692.4393	2745
0Safe_safe_UNA1_209693.4394	3919
0Safe_safe_UNA1_209702.4403	2836
0Safe_safe_UNA1_209707.4408	4092
0Safe_safe_UNA1_209708.4409	3230
0Safe_safe_UNA1_209714.4415	1928
0Safe_safe_UNA1_209718.4419	2149
0Safe_safe_UNA1_209726.4427	1199
0Safe_safe_UNA1_209732.4433	2201
0Safe_safe_UNA1_209735.4436	3905
0Safe_safe_UNA1_209738.4439	2379
0Safe_safe_UNA1_209753.4454	2670
0Safe_safe_UNA1_209776.4477	2344
0Safe_safe_UNA1_209779.4480	2546
0Safe_safe_UNA1_209781.4482	1502
0Safe_safe_UNA2_209806.3007	3841
0Safe_safe_UNA2_209807.3008	2854
0Safe_safe_UNA2_209811.3012	93
0Safe_safe_UNA2_209817.3018	3403
0Safe_safe_UNA2_209819.3020	2023
0Safe_safe_UNA2_209840.3041	3442
0Safe_safe_UNA2_209851.3052	1323
0Safe_safe_UNA2_209866.3067	1812
0Safe_safe_UNA2_209870.3071	2029
0Safe_safe_UNA2_209872.3073	2847
0Safe_safe_UNA2_209888.3089	2529
0Safe_safe_UNA2_209890.3091	814
0Safe_safe_UNA2_209891.3092	2216
0Safe_safe_UNA2_209896.3097	2893
0Safe_safe_UNA2_209912.3113	3648
0Safe_safe_UNA2_209918.3119	1686
0Safe_safe_UNA2_209924.3125	3340
0Safe_safe_UNA2_209925.3126	2561
0Safe_safe_UNA2_209936.3137	3899
0Safe_safe_UNA2_209941.3142	2721
0Safe_safe_UNA2_209947.3148	2761
0Safe_safe_UNA2_209950.3151	2536
0Safe_safe_UNA2_209958.3159	2486
0Safe_safe_UNA2_209977.3178	3579
0Safe_safe_UNA2_209981.3182	3553
0Safe_safe_UNA2_210003.3204	3533
0Safe_safe_UNA2_210034.3235	2249
0Safe_safe_UNA2_210050.3251	1825
0Safe_safe_UNA2_210057.3258	1793
0Safe_safe_UNA2_210059.3260	1735
0Safe_safe_UNA2_210077.3278	1265
0Safe_safe_UNA2_210081.3282	2854
0Safe_safe_UNA2_210083.3284	3634
0Safe_safe_UNA2_210085.3286	3385
0Safe_safe_UNA2_210091.3292	2507
0Safe_safe_UNA2_210094.3295	2496
0Safe_safe_UNA2_210096.3297	1349
0Safe_safe_UNA2_210101.3302	1400
0Safe_safe_UNA2_210120.3321	1476
0Safe_safe_UNA2_210135.3336	1993
0Safe_safe_UNA2_210139.3340	2076
0Safe_safe_UNA2_210153.3354	3112
0Safe_safe_UNA2_210155.3356	3266
0Safe_safe_UNA2_210156.3357	1982
0Safe_safe_UNA2_210166.3367	1713
0Safe_safe_UNA2_210168.3369	2683
0Safe_safe_UNA2_210183.3384	1364
0Safe_safe_UNA2_210185.3386	2698
0Safe_safe_UNA2_210192.3393	2374
0Safe_safe_UNA2_210193.3394	1717
0Safe_safe_UNA2_210200.3401	2136
0Safe_safe_UNA2_210202.3403	2936
0Safe_safe_UNA2_210204.3405	1914
0Safe_safe_UNA2_210206.3407	2463
0Safe_safe_UNA2_210221.3422	1592
0Safe_safe_UNA2_210223.3424	2742
0Safe_safe_UNA2_210226.3427	1300
0Safe_safe_UNA2_210227.3428	2476
0Safe_safe_UNA2_210236.3437	2729
0Safe_safe_UNA2_210241.3442	2214
0Safe_safe_UNA2_210247.3448	2350
0Safe_safe_UNA2_210258.3459	2063
0Safe_safe_UNA2_210265.3466	2153
0Safe_safe_UNA2_210283.3484	1871
0Safe_safe_UNA2_210288.3489	3040
0Safe_safe_UNA2_210292.3493	3186
0Safe_safe_UNA2_210294.3495	2213
0Safe_safe_UNA2_210298.3499	1828
0Safe_safe_UNA2_210299.3500	2563
0Safe_safe_UNA2_210312.3513	659
0Safe_safe_UNA2_210313.3514	2215
0Safe_safe_UNA2_210321.3522	2119
0Safe_safe_UNA2_210327.3528	1928
0Safe_safe_UNA2_210337.3538	2640
0Safe_safe_UNA2_210341.3542	1953
0Safe_safe_UNA2_210351.3552	3252
0Safe_safe_UNA2_210357.3558	1884
0Safe_safe_UNA2_210358.3559	3041
0Safe_safe_UNA2_210363.3564	1868
0Safe_safe_UNA2_210373.3574	3565
0Safe_safe_UNA2_210378.3579	1753
0Safe_safe_UNA2_210388.3589	1588
0Safe_safe_UNA2_210402.3603	3849
0Safe_safe_UNA2_210419.3620	3081
0Safe_safe_UNA2_210420.3621	2297
0Safe_safe_UNA2_210434.3635	2214
0Safe_safe_UNA2_210459.3660	1966
0Safe_safe_UNA2_210478.3679	2548
0Safe_safe_UNA2_210480.3681	968
0Safe_safe_UNA2_210483.3684	3653
0Safe_safe_UNA2_210487.3688	2516
0Safe_safe_UNA2_210489.3690	3043
0Safe_safe_UNA2_210490.3691	2446
0Safe_safe_UNA2_210500.3701	4204
0Safe_safe_UNA2_210512.3713	3990
0Safe_safe_UNA2_210521.3722	2385
0Safe_safe_UNA2_210527.3728	2183
0Safe_safe_UNA2_210538.3739	2561
0Safe_safe_UNA2_210547.3748	2094
0Safe_safe_UNA3_210560.6011	1490
0Safe_safe_UNA3_210582.6033	2028
0Safe_safe_UNA3_210586.6037	1537
0Safe_safe_UNA3_210593.6044	2159
0Safe_safe_UNA3_210599.6050	2986
0Safe_safe_UNA3_210601.6052	1767
0Safe_safe_UNA3_210606.6057	2397
0Safe_safe_UNA3_210607.6058	2560
0Safe_safe_UNA3_210612.6063	3577
0Safe_safe_UNA3_210622.6073	1783
0Safe_safe_UNA3_210628.6079	1538
0Safe_safe_UNA3_210633.6084	2589
0Safe_safe_UNA3_210634.6085	2458
0Safe_safe_UNA3_210643.6094	958
0Safe_safe_UNA3_210644.6095	466
0Safe_safe_UNA3_210648.6099	2033
0Safe_safe_UNA3_210676.6127	2721
0Safe_safe_UNA3_210679.6130	2851
0Safe_safe_UNA3_210709.6160	4270
0Safe_safe_UNA3_210711.6162	2258
0Safe_safe_UNA3_210714.6165	2442
0Safe_safe_UNA3_210717.6168	1768
0Safe_safe_UNA3_210719.6170	2851
0Safe_safe_UNA3_210721.6172	3246
0Safe_safe_UNA3_210723.6174	3075
0Safe_safe_UNA3_210725.6176	2436
0Safe_safe_UNA3_210728.6179	2449
0Safe_safe_UNA3_210733.6184	2252
0Safe_safe_UNA3_210737.6188	1928
0Safe_safe_UNA3_210738.6189	2331
0Safe_safe_UNA3_210739.6190	3066
0Safe_safe_UNA3_210753.6204	3103
0Safe_safe_UNA3_210756.6207	2893
0Safe_safe_UNA3_210758.6209	1797
0Safe_safe_UNA3_210759.6210	3391
0Safe_safe_UNA3_210760.6211	2821
0Safe_safe_UNA3_210768.6219	2026
0Safe_safe_UNA3_210772.6223	1341
0Safe_safe_UNA3_210780.6231	1914
0Safe_safe_UNA3_210781.6232	1774
0Safe_safe_UNA3_210785.6236	2780
0Safe_safe_UNA3_210792.6243	1805
0Safe_safe_UNA3_210794.6245	1697
0Safe_safe_UNA3_210797.6248	2093
0Safe_safe_UNA3_210799.6250	2594
0Safe_safe_UNA3_210800.6251	1887
0Safe_safe_UNA3_210804.6255	1850
0Safe_safe_UNA3_210807.6258	2083
0Safe_safe_UNA3_210808.6259	1170
0Safe_safe_UNA3_210813.6264	2075
0Safe_safe_UNA3_210814.6265	2166
0Safe_safe_UNA3_210819.6270	2342
0Safe_safe_UNA3_210825.6276	1777
0Safe_safe_UNA3_210840.6291	1023
0Safe_safe_UNA3_210845.6296	2999
0Safe_safe_UNA3_210850.6301	2178
0Safe_safe_UNA3_210861.6312	3303
0Safe_safe_UNA3_210867.6318	3070
0Safe_safe_UNA3_210880.6331	1802
0Safe_safe_UNA3_210882.6333	2214
0Safe_safe_UNA3_210889.6340	3016
0Safe_safe_UNA3_210913.6364	1957
0Safe_safe_UNA3_210915.6366	3457
0Safe_safe_UNA3_210936.6387	2078
0Safe_safe_UNA3_210939.6390	2595
0Safe_safe_UNA3_210944.6395	1719
0Safe_safe_UNA3_210947.6398	2158
0Safe_safe_UNA3_210949.6400	829
0Safe_safe_UNA3_210951.6402	2960
0Safe_safe_UNA3_210963.6414	2295
0Safe_safe_UNA3_210969.6420	2193
0Safe_safe_UNA3_210978.6429	2449
0Safe_safe_UNA3_210989.6440	1935
0Safe_safe_UNA3_210995.6446	1584
0Safe_safe_UNA3_211003.6454	963
0Safe_safe_UNA3_211009.6460	1335
0Safe_safe_UNA3_211011.6462	2033
0Safe_safe_UNA3_211017.6468	5438
0Safe_safe_UNA3_211022.6473	5136
0Safe_safe_UNA3_211027.6478	1782
0Safe_safe_UNA3_211034.6485	1213
0Safe_safe_UNA3_211037.6488	4055
0Safe_safe_UNA3_211051.6502	2889
0Safe_safe_UNA3_211057.6508	3327
0Safe_safe_UNA3_211063.6514	2876
0Safe_safe_UNA3_211077.6528	3080
0Safe_safe_UNA3_211078.6529	954
0Safe_safe_UNA3_211082.6533	3554
0Safe_safe_UNA3_211086.6537	3485
0Safe_safe_UNA3_211091.6542	2921
0Safe_safe_UNA3_211093.6544	2869
0Safe_safe_UNA3_211100.6551	2848
0Safe_safe_UNA3_211107.6558	2324
0Safe_safe_UNA3_211123.6574	2875
0Safe_safe_UNA3_211129.6580	2867
0Safe_safe_UNA3_211142.6593	2084
0Safe_safe_UNA3_211144.6595	2342
0Safe_safe_UNA3_211149.6600	3314
0Safe_safe_UNA3_211150.6601	1892
0Safe_safe_UNA3_211165.6616	1610
0Safe_safe_UNA3_211166.6617	3061
0Safe_safe_UNA3_211172.6623	1581
0Safe_safe_UNA3_211175.6626	4104
0Safe_safe_UNA3_211183.6634	2194
0Safe_safe_UNA3_211184.6635	2586
0Safe_safe_UNA3_211186.6637	1575
0Safe_safe_UNA3_211187.6638	1598
0Safe_safe_UNA3_211188.6639	2773
0Safe_safe_UNA3_211197.6648	1106
0Safe_safe_UNA3_211204.6655	2466
0Safe_safe_UNA3_211217.6668	2266
0Safe_safe_UNA3_211223.6674	1542
0Safe_safe_UNA3_211230.6681	2704
0Safe_safe_UNA3_211231.6682	1659
0Safe_safe_UNA3_211232.6683	5149
0Safe_safe_UNA3_211233.6684	2819
0Safe_safe_UNA3_211242.6693	1796
0Safe_safe_UNA3_211266.6717	2713
0Safe_safe_UNA3_211270.6721	2917
0Safe_safe_UNA3_211271.6722	1801
0Safe_safe_UNA3_211272.6723	2670
0Safe_safe_UNA3_211278.6729	2798
0Safe_safe_UNA3_211290.6741	2442
ABCB11_P1P2_crispri_491	2874
ABCB11_P1P2_crispri_492	2455
[truncated: 2,953 more rows]

## Sheet: Retro-2 rep 2
0NONE_na_crispri_205283	2677
0NONE_na_crispri_205288	1247
0NONE_na_crispri_205289	1659
0NONE_na_crispri_205291	2758
0NONE_na_crispri_205292	1744
0NONE_na_crispri_205296	1982
0NONE_na_crispri_205298	2091
0NONE_na_crispri_205299	1446
0NONE_na_crispri_205300	1690
0NONE_na_crispri_205301	4152
0NONE_na_crispri_205304	1895
0NONE_na_crispri_205305	2191
0NONE_na_crispri_205308	792
0NONE_na_crispri_205313	2743
0NONE_na_crispri_205320	2158
0NONE_na_crispri_205327	2619
0NONE_na_crispri_205330	1948
0NONE_na_crispri_205334	1739
0NONE_na_crispri_205335	3101
0NONE_na_crispri_205336	2816
0NONE_na_crispri_205338	2376
0NONE_na_crispri_205340	1594
0NONE_na_crispri_205347	3232
0NONE_na_crispri_205348	1971
0NONE_na_crispri_205353	1786
0NONE_na_crispri_205363	2829
0NONE_na_crispri_205364	2168
0NONE_na_crispri_205366	2765
0NONE_na_crispri_205367	2451
0NONE_na_crispri_205369	2726
0NONE_na_crispri_205372	3150
0NONE_na_crispri_205375	2067
0NONE_na_crispri_205376	1243
0NONE_na_crispri_205393	3677
0NONE_na_crispri_205395	2259
0NONE_na_crispri_205399	2411
0NONE_na_crispri_205401	1762
0NONE_na_crispri_205403	2518
0NONE_na_crispri_205408	1751
0NONE_na_crispri_205415	2222
0NONE_na_crispri_205418	2550
0NONE_na_crispri_205420	1234
0NONE_na_crispri_205425	2886
0NONE_na_crispri_205427	2138
0NONE_na_crispri_205436	2261
0NONE_na_crispri_205439	1451
0NONE_na_crispri_205442	2502
0NONE_na_crispri_205446	1271
0NONE_na_crispri_205449	3071
0NONE_na_crispri_205450	926
0NONE_na_crispri_205451	2736
0NONE_na_crispri_205452	1990
0NONE_na_crispri_205458	2294
0NONE_na_crispri_205459	2131
0NONE_na_crispri_205460	3177
0NONE_na_crispri_205463	2674
0NONE_na_crispri_205469	2894
0NONE_na_crispri_205474	334
0NONE_na_crispri_205477	2615
0NONE_na_crispri_205478	2241
0NONE_na_crispri_205479	2626
0NONE_na_crispri_205481	3492
0NONE_na_crispri_205484	2157
0NONE_na_crispri_205498	3465
0NONE_na_crispri_205499	2158
0NONE_na_crispri_205512	1613
0NONE_na_crispri_205513	3158
0NONE_na_crispri_205514	763
0NONE_na_crispri_205524	1361
0NONE_na_crispri_205526	2071
0NONE_na_crispri_205530	1348
0NONE_na_crispri_205537	1694
0NONE_na_crispri_205540	1607
0NONE_na_crispri_205546	51
0NONE_na_crispri_205562	1583
0NONE_na_crispri_205563	2736
0NONE_na_crispri_205565	2200
0NONE_na_crispri_205566	1478
0NONE_na_crispri_205569	2302
0NONE_na_crispri_205576	3332
0NONE_na_crispri_205588	2166
0NONE_na_crispri_205596	2758
0NONE_na_crispri_205605	2027
0NONE_na_crispri_205606	3479
0NONE_na_crispri_205615	4038
0NONE_na_crispri_205619	3256
0NONE_na_crispri_205624	510
0NONE_na_crispri_205635	1906
0NONE_na_crispri_205639	2122
0NONE_na_crispri_205640	2408
0NONE_na_crispri_205647	3839
0NONE_na_crispri_205648	1343
0NONE_na_crispri_205652	2035
0NONE_na_crispri_205654	2560
0NONE_na_crispri_205667	1851
0NONE_na_crispri_205669	3756
0NONE_na_crispri_205670	2555
0NONE_na_crispri_205672	1205
0NONE_na_crispri_205689	3069
0NONE_na_crispri_205690	2769
0NONE_na_crispri_205691	1576
0NONE_na_crispri_205692	1976
0NONE_na_crispri_205695	3629
0NONE_na_crispri_205698	4656
0NONE_na_crispri_205702	2070
0NONE_na_crispri_205704	1731
0NONE_na_crispri_205706	3674
0NONE_na_crispri_205708	3605
0NONE_na_crispri_205709	2222
0NONE_na_crispri_205717	3141
0NONE_na_crispri_205718	2354
0NONE_na_crispri_205723	2061
0NONE_na_crispri_205734	1101
0NONE_na_crispri_205736	1713
0NONE_na_crispri_205739	1121
0NONE_na_crispri_205743	2248
0NONE_na_crispri_205746	3598
0NONE_na_crispri_205749	4176
0NONE_na_crispri_205750	2546
0NONE_na_crispri_205751	1596
0NONE_na_crispri_205759	1002
0NONE_na_crispri_205764	1851
0NONE_na_crispri_205765	1862
0NONE_na_crispri_205769	2347
0NONE_na_crispri_205778	2973
0NONE_na_crispri_205783	2037
0NONE_na_crispri_205784	1938
0NONE_na_crispri_205786	1683
0NONE_na_crispri_205787	2258
0NONE_na_crispri_205789	1756
0NONE_na_crispri_205790	4214
0NONE_na_crispri_205806	1984
0NONE_na_crispri_205807	2921
0NONE_na_crispri_205812	4633
0NONE_na_crispri_205813	1876
0NONE_na_crispri_205814	1521
0NONE_na_crispri_205823	3368
0NONE_na_crispri_205825	2461
0NONE_na_crispri_205827	1704
0NONE_na_crispri_205828	2255
0NONE_na_crispri_205829	2759
0NONE_na_crispri_205830	1334
0NONE_na_crispri_205833	1782
0NONE_na_crispri_205840	1692
0NONE_na_crispri_205842	2508
0NONE_na_crispri_205845	2452
0NONE_na_crispri_205855	2552
0NONE_na_crispri_205856	1874
0NONE_na_crispri_205865	1914
0NONE_na_crispri_205866	2306
0NONE_na_crispri_205868	2328
0NONE_na_crispri_205874	1756
0NONE_na_crispri_205875	3273
0NONE_na_crispri_205881	2133
0NONE_na_crispri_205894	2741
0NONE_na_crispri_205897	3348
0NONE_na_crispri_205901	2784
0NONE_na_crispri_205903	3421
0NONE_na_crispri_205906	2145
0NONE_na_crispri_205907	3885
0NONE_na_crispri_205908	2716
0NONE_na_crispri_205909	1435
0NONE_na_crispri_205911	1365
0NONE_na_crispri_205917	2463
0NONE_na_crispri_205927	1534
0NONE_na_crispri_205933	1815
0NONE_na_crispri_205934	2965
0NONE_na_crispri_205937	2813
0NONE_na_crispri_205947	2050
0NONE_na_crispri_205949	2009
0NONE_na_crispri_205951	2181
0NONE_na_crispri_205955	2507
0NONE_na_crispri_205956	3617
0NONE_na_crispri_205959	2163
0NONE_na_crispri_205961	1722
0NONE_na_crispri_205966	3073
0NONE_na_crispri_205973	178
0NONE_na_crispri_205975	1651
0NONE_na_crispri_205981	3858
0NONE_na_crispri_205984	2382
0NONE_na_crispri_205985	2720
0NONE_na_crispri_205989	2160
0NONE_na_crispri_205990	2639
0NONE_na_crispri_205992	2169
0NONE_na_crispri_205993	1717
0NONE_na_crispri_205994	3569
0NONE_na_crispri_206004	2281
0NONE_na_crispri_206010	1380
0NONE_na_crispri_206014	2533
0NONE_na_crispri_206022	2271
0NONE_na_crispri_206024	2178
0NONE_na_crispri_206027	2651
0NONE_na_crispri_206030	1768
0NONE_na_crispri_206032	2307
0NONE_na_crispri_206037	2424
0NONE_na_crispri_206039	3364
0NONE_na_crispri_206040	2721
0NONE_na_crispri_206047	1743
0NONE_na_crispri_206051	3122
0NONE_na_crispri_206054	1230
0NONE_na_crispri_206056	1539
0NONE_na_crispri_206062	1759
0NONE_na_crispri_206066	1999
0NONE_na_crispri_206077	2434
0NONE_na_crispri_206079	194
0NONE_na_crispri_206086	1707
0NONE_na_crispri_206092	1704
0NONE_na_crispri_206100	2103
0NONE_na_crispri_206101	3733
0NONE_na_crispri_206104	2455
0NONE_na_crispri_206106	1666
0NONE_na_crispri_206107	1936
0NONE_na_crispri_206110	2445
0NONE_na_crispri_206113	1963
0NONE_na_crispri_206114	1420
0NONE_na_crispri_206117	2203
0NONE_na_crispri_206119	1730
0NONE_na_crispri_206123	27
0NONE_na_crispri_206124	2558
0NONE_na_crispri_206128	1631
0NONE_na_crispri_206137	1485
0NONE_na_crispri_206139	4256
0NONE_na_crispri_206148	2864
0NONE_na_crispri_206149	1105
0NONE_na_crispri_206158	2729
0NONE_na_crispri_206166	2465
0NONE_na_crispri_206167	3382
0NONE_na_crispri_206170	1387
0NONE_na_crispri_206173	3064
0NONE_na_crispri_206175	2416
0NONE_na_crispri_206177	1582
0NONE_na_crispri_206180	2324
0NONE_na_crispri_206188	3085
0NONE_na_crispri_206189	1624
0NONE_na_crispri_206190	3373
0NONE_na_crispri_206191	3375
0NONE_na_crispri_206193	5539
0NONE_na_crispri_206199	2191
0NONE_na_crispri_206212	2280
0NONE_na_crispri_206218	1831
0NONE_na_crispri_206219	738
0NONE_na_crispri_206220	3403
0NONE_na_crispri_206231	1754
0NONE_na_crispri_206233	2576
0NONE_na_crispri_206244	1474
0NONE_na_crispri_206245	2819
0NONE_na_crispri_206246	1827
0NONE_na_crispri_206251	1990
0NONE_na_crispri_206252	3275
0NONE_na_crispri_206253	1979
0NONE_na_crispri_206259	2042
0NONE_na_crispri_206262	3032
0NONE_na_crispri_206263	3642
0NONE_na_crispri_206264	3383
0NONE_na_crispri_206274	2080
0NONE_na_crispri_206276	1617
0NONE_na_crispri_206281	2590
0NONE_na_crispri_206284	3210
0NONE_na_crispri_206285	2184
0NONE_na_crispri_206291	2102
0NONE_na_crispri_206292	3110
0NONE_na_crispri_206293	2556
0NONE_na_crispri_206294	2224
0NONE_na_crispri_206296	3320
0NONE_na_crispri_206298	2490
0NONE_na_crispri_206307	2165
0NONE_na_crispri_206310	2532
0NONE_na_crispri_206312	1481
0NONE_na_crispri_206317	2143
0NONE_na_crispri_206319	3280
0NONE_na_crispri_206321	3000
0NONE_na_crispri_206324	2290
0NONE_na_crispri_206331	2312
0NONE_na_crispri_206332	1518
0NONE_na_crispri_206335	2315
0NONE_na_crispri_206336	1539
0NONE_na_crispri_206338	3632
0NONE_na_crispri_206345	2049
0NONE_na_crispri_206346	2021
0NONE_na_crispri_206347	1857
0NONE_na_crispri_206351	2622
0NONE_na_crispri_206353	1894
0NONE_na_crispri_206355	3331
0NONE_na_crispri_206358	2775
0NONE_na_crispri_206361	3331
0NONE_na_crispri_206364	3163
0NONE_na_crispri_206369	1681
0NONE_na_crispri_206370	3337
0NONE_na_crispri_206371	1837
0NONE_na_crispri_206373	3546
0NONE_na_crispri_206374	2693
0NONE_na_crispri_206378	1544
0NONE_na_crispri_206379	2480
0NONE_na_crispri_206383	3293
0NONE_na_crispri_206388	3083
0NONE_na_crispri_206390	3601
0NONE_na_crispri_206392	2568
0NONE_na_crispri_206397	11
0NONE_na_crispri_206398	3267
0NONE_na_crispri_206412	2136
0NONE_na_crispri_206417	3052
0NONE_na_crispri_206425	2316
0NONE_na_crispri_206436	2644
0NONE_na_crispri_206438	2091
0NONE_na_crispri_206439	2837
0NONE_na_crispri_206443	1789
0NONE_na_crispri_206444	2128
0NONE_na_crispri_206449	2620
0NONE_na_crispri_206453	2208
0NONE_na_crispri_206454	3589
0NONE_na_crispri_206457	2354
0NONE_na_crispri_206459	2136
0NONE_na_crispri_206460	2712
0NONE_na_crispri_206462	1525
0NONE_na_crispri_206463	1320
0NONE_na_crispri_206465	2130
0NONE_na_crispri_206466	3269
0NONE_na_crispri_206475	3304
0NONE_na_crispri_206480	2069
0NONE_na_crispri_206481	3494
0NONE_na_crispri_206484	1238
0NONE_na_crispri_206485	2934
0NONE_na_crispri_206486	3179
0NONE_na_crispri_206493	2622
0NONE_na_crispri_206496	2173
0NONE_na_crispri_206500	1832
0NONE_na_crispri_206505	743
0NONE_na_crispri_206506	844
0NONE_na_crispri_206507	2552
0NONE_na_crispri_206514	1538
0NONE_na_crispri_206517	2873
0NONE_na_crispri_206520	973
0NONE_na_crispri_206524	2515
0NONE_na_crispri_206530	2071
0NONE_na_crispri_206534	2673
0NONE_na_crispri_206537	2568
0NONE_na_crispri_206542	1832
0NONE_na_crispri_206549	2308
0NONE_na_crispri_206555	1767
0NONE_na_crispri_206556	2704
0NONE_na_crispri_206558	2407
0NONE_na_crispri_206560	2185
0NONE_na_crispri_206562	4774
0NONE_na_crispri_206567	2242
0NONE_na_crispri_206573	1637
0NONE_na_crispri_206575	1855
0NONE_na_crispri_206579	3131
0NONE_na_crispri_206583	1399
0NONE_na_crispri_206584	2778
0NONE_na_crispri_206585	4517
0NONE_na_crispri_206592	2582
0NONE_na_crispri_206597	2800
0NONE_na_crispri_206598	2985
0NONE_na_crispri_206607	3795
0NONE_na_crispri_206611	73
0NONE_na_crispri_206613	1675
0NONE_na_crispri_206622	2465
0NONE_na_crispri_206625	1691
0NONE_na_crispri_206633	1736
0NONE_na_crispri_206634	2899
0NONE_na_crispri_206639	3629
0NONE_na_crispri_206642	1522
0NONE_na_crispri_206647	2463
0NONE_na_crispri_206652	2184
0NONE_na_crispri_206657	2046
0NONE_na_crispri_206659	1177
0NONE_na_crispri_206667	2110
0NONE_na_crispri_206670	3209
0NONE_na_crispri_206675	2226
0NONE_na_crispri_206681	2550
0NONE_na_crispri_206683	2394
0NONE_na_crispri_206694	1765
0NONE_na_crispri_206695	3246
0NONE_na_crispri_206697	1853
0NONE_na_crispri_206699	833
0NONE_na_crispri_206701	2041
0NONE_na_crispri_206702	1937
0NONE_na_crispri_206704	2220
0NONE_na_crispri_206709	2339
0NONE_na_crispri_206710	948
0NONE_na_crispri_206723	1967
0NONE_na_crispri_206728	1442
0NONE_na_crispri_206729	2499
0NONE_na_crispri_206730	2036
0NONE_na_crispri_206741	3220
0NONE_na_crispri_206754	2347
0NONE_na_crispri_206756	595
0NONE_na_crispri_206757	1057
0NONE_na_crispri_206760	2839
0NONE_na_crispri_206764	1522
0NONE_na_crispri_206765	3265
0NONE_na_crispri_206766	2933
0NONE_na_crispri_206767	2777
0NONE_na_crispri_206773	2442
0NONE_na_crispri_206774	1967
0NONE_na_crispri_206777	2823
0NONE_na_crispri_206778	1894
0NONE_na_crispri_206781	1857
0NONE_na_crispri_206782	907
0NONE_na_crispri_206784	1631
0NONE_na_crispri_206787	694
0NONE_na_crispri_206806	2100
0NONE_na_crispri_206809	3078
0NONE_na_crispri_206812	2229
0NONE_na_crispri_206815	1763
0NONE_na_crispri_206821	3132
0NONE_na_crispri_206822	3607
0NONE_na_crispri_206823	2570
0NONE_na_crispri_206824	4228
0NONE_na_crispri_206825	1347
0NONE_na_crispri_206826	1050
0NONE_na_crispri_206829	1751
0NONE_na_crispri_206831	1829
0NONE_na_crispri_206834	2408
0NONE_na_crispri_206840	3000
0NONE_na_crispri_206844	3151
0NONE_na_crispri_206848	2302
0NONE_na_crispri_206852	1777
0NONE_na_crispri_206854	4314
0NONE_na_crispri_206856	2415
0NONE_na_crispri_206860	2311
0NONE_na_crispri_206861	3006
0NONE_na_crispri_206862	1672
0NONE_na_crispri_206865	3259
0NONE_na_crispri_206866	2262
0NONE_na_crispri_206869	2133
0NONE_na_crispri_206872	4296
0NONE_na_crispri_206878	1023
0NONE_na_crispri_206879	2242
0NONE_na_crispri_206882	4807
0NONE_na_crispri_206885	2004
0NONE_na_crispri_206897	2906
0NONE_na_crispri_206903	3101
0NONE_na_crispri_206904	2179
0NONE_na_crispri_206906	2273
0NONE_na_crispri_206909	2075
0NONE_na_crispri_206910	3636
0NONE_na_crispri_206914	2779
0NONE_na_crispri_206917	742
0NONE_na_crispri_206919	2380
0NONE_na_crispri_206920	2492
0NONE_na_crispri_206923	1868
0NONE_na_crispri_206926	1212
0NONE_na_crispri_206929	1199
0NONE_na_crispri_206933	1908
0NONE_na_crispri_206935	1824
0NONE_na_crispri_206936	2407
0NONE_na_crispri_206938	2321
0NONE_na_crispri_206945	2917
0NONE_na_crispri_206946	3525
0NONE_na_crispri_206947	2430
0NONE_na_crispri_206949	4332
0NONE_na_crispri_206954	4306
0NONE_na_crispri_206956	1772
0NONE_na_crispri_206958	2631
0NONE_na_crispri_206962	2620
0NONE_na_crispri_206963	1618
0NONE_na_crispri_206965	2404
0NONE_na_crispri_206972	2463
0NONE_na_crispri_206976	2096
0NONE_na_crispri_206985	2630
0NONE_na_crispri_206991	1638
0NONE_na_crispri_206992	4926
0NONE_na_crispri_206993	1689
0NONE_na_crispri_207005	1735
0NONE_na_crispri_207007	1878
0NONE_na_crispri_207008	2255
0NONE_na_crispri_207016	3722
0NONE_na_crispri_207019	1850
0NONE_na_crispri_207021	3066
0NONE_na_crispri_207022	2247
0NONE_na_crispri_207029	1167
0NONE_na_crispri_207043	2191
0NONE_na_crispri_207044	5006
0NONE_na_crispri_207053	2512
0NONE_na_crispri_207059	2019
0NONE_na_crispri_207063	2771
0NONE_na_crispri_207069	2670
0NONE_na_crispri_207070	1445
0NONE_na_crispri_207074	2825
0NONE_na_crispri_207080	1937
0NONE_na_crispri_207084	2360
0NONE_na_crispri_207090	2010
0NONE_na_crispri_207103	2713
0NONE_na_crispri_207108	2658
0NONE_na_crispri_207110	2094
0NONE_na_crispri_207118	2248
0NONE_na_crispri_207119	3340
0NONE_na_crispri_207126	1792
0NONE_na_crispri_207128	1784
0NONE_na_crispri_207131	1784
0NONE_na_crispri_207132	2090
0NONE_na_crispri_207140	2335
0NONE_na_crispri_207141	2208
0NONE_na_crispri_207144	2745
0NONE_na_crispri_207147	1625
0NONE_na_crispri_207149	2283
0NONE_na_crispri_207154	896
0NONE_na_crispri_207158	3070
0NONE_na_crispri_207160	1605
0NONE_na_crispri_207162	2671
0NONE_na_crispri_207163	1625
0NONE_na_crispri_207173	2671
0NONE_na_crispri_207183	2658
0NONE_na_crispri_207185	3222
0NONE_na_crispri_207186	1886
0NONE_na_crispri_207187	1672
0NONE_na_crispri_207192	3464
0NONE_na_crispri_207196	1800
0NONE_na_crispri_207200	1956
0NONE_na_crispri_207203	2252
0NONE_na_crispri_207204	1157
0NONE_na_crispri_207206	2991
0NONE_na_crispri_207208	2453
0NONE_na_crispri_207211	3318
0NONE_na_crispri_207212	1957
0NONE_na_crispri_207213	1788
0NONE_na_crispri_207214	2213
0NONE_na_crispri_207215	1497
0NONE_na_crispri_207216	1646
0NONE_na_crispri_207218	1729
0NONE_na_crispri_207219	3415
0NONE_na_crispri_207222	1446
0NONE_na_crispri_207224	2236
0NONE_na_crispri_207225	2291
0NONE_na_crispri_207226	1683
0NONE_na_crispri_207228	849
0NONE_na_crispri_207230	1545
0NONE_na_crispri_207239	2258
0NONE_na_crispri_207245	2693
0NONE_na_crispri_207257	1906
0NONE_na_crispri_207271	2172
0NONE_na_crispri_207272	3449
0NONE_na_crispri_207273	2394
0NONE_na_crispri_207274	1012
0NONE_na_crispri_207282	2440
0NONE_na_crispri_207289	1678
0NONE_na_crispri_207297	3682
0NONE_na_crispri_207300	2268
0NONE_na_crispri_207302	1382
0NONE_na_crispri_207305	2235
0NONE_na_crispri_207318	2933
0NONE_na_crispri_207319	927
0NONE_na_crispri_207330	1210
0NONE_na_crispri_207334	3728
0NONE_na_crispri_207338	1456
0NONE_na_crispri_207339	2134
0NONE_na_crispri_207348	1771
0NONE_na_crispri_207351	2615
0NONE_na_crispri_207354	1863
0NONE_na_crispri_207355	3456
0NONE_na_crispri_207356	1753
0NONE_na_crispri_207363	1194
0NONE_na_crispri_207366	1972
0NONE_na_crispri_207370	2326
0NONE_na_crispri_207371	1374
0NONE_na_crispri_207372	2412
0NONE_na_crispri_207373	2854
0NONE_na_crispri_207375	2167
0NONE_na_crispri_207389	3050
0NONE_na_crispri_207390	2801
0NONE_na_crispri_207394	2695
0NONE_na_crispri_207395	3380
0NONE_na_crispri_207400	2553
0NONE_na_crispri_207406	2543
0NONE_na_crispri_207408	2216
0NONE_na_crispri_207413	2450
0NONE_na_crispri_207427	1820
0NONE_na_crispri_207428	2458
0NONE_na_crispri_207431	1967
0NONE_na_crispri_207432	1791
0NONE_na_crispri_207434	3162
0NONE_na_crispri_207435	2925
0NONE_na_crispri_207437	2146
0NONE_na_crispri_207444	1961
0NONE_na_crispri_207450	4225
0NONE_na_crispri_207452	1507
0NONE_na_crispri_207457	2878
0NONE_na_crispri_207459	2821
0NONE_na_crispri_207461	3397
0NONE_na_crispri_207462	2499
0NONE_na_crispri_207468	2034
0NONE_na_crispri_207471	1942
0NONE_na_crispri_207475	2476
0NONE_na_crispri_207479	3120
0NONE_na_crispri_207482	1373
0NONE_na_crispri_207483	2299
0NONE_na_crispri_207487	2524
0NONE_na_crispri_207489	2636
0NONE_na_crispri_207493	2357
0NONE_na_crispri_207494	2371
0NONE_na_crispri_207508	1630
0NONE_na_crispri_207510	2386
0NONE_na_crispri_207511	2706
0NONE_na_crispri_207512	3029
0NONE_na_crispri_207514	2444
0NONE_na_crispri_207516	750
0NONE_na_crispri_207522	1244
0NONE_na_crispri_207534	1567
0NONE_na_crispri_207542	3298
0NONE_na_crispri_207553	1147
0NONE_na_crispri_207555	3214
0NONE_na_crispri_207560	2735
0NONE_na_crispri_207566	2730
0NONE_na_crispri_207570	2339
0NONE_na_crispri_207571	3360
0NONE_na_crispri_207576	3080
0NONE_na_crispri_207582	2581
0NONE_na_crispri_207589	1135
0NONE_na_crispri_207590	1476
0NONE_na_crispri_207597	2005
0NONE_na_crispri_207599	965
0NONE_na_crispri_207602	2829
0NONE_na_crispri_207608	1861
0NONE_na_crispri_207613	2728
0NONE_na_crispri_207614	3464
0NONE_na_crispri_207615	2298
0NONE_na_crispri_207617	2116
0NONE_na_crispri_207618	1013
0NONE_na_crispri_207627	3738
0NONE_na_crispri_207631	2663
0NONE_na_crispri_207632	2261
0NONE_na_crispri_207636	2607
0NONE_na_crispri_207637	1391
0NONE_na_crispri_207639	1852
0NONE_na_crispri_207640	1781
0NONE_na_crispri_207641	1213
0NONE_na_crispri_207642	2790
0NONE_na_crispri_207643	2441
0NONE_na_crispri_207644	3058
0NONE_na_crispri_207646	2041
0NONE_na_crispri_207647	4542
0NONE_na_crispri_207649	1179
0NONE_na_crispri_207655	3103
0NONE_na_crispri_207658	2038
0NONE_na_crispri_207660	1882
0NONE_na_crispri_207662	2091
0NONE_na_crispri_207669	2805
0NONE_na_crispri_207672	3123
0NONE_na_crispri_207673	2716
0NONE_na_crispri_207679	565
0NONE_na_crispri_207684	3231
0NONE_na_crispri_207694	1850
0NONE_na_crispri_207696	2029
0NONE_na_crispri_207704	3500
0NONE_na_crispri_207709	2138
0NONE_na_crispri_207710	2430
0NONE_na_crispri_207711	3503
0NONE_na_crispri_207721	186
0NONE_na_crispri_207728	2073
0NONE_na_crispri_207740	2597
0NONE_na_crispri_207743	2740
0NONE_na_crispri_207744	765
0NONE_na_crispri_207747	2648
0NONE_na_crispri_207753	729
0NONE_na_crispri_207757	2230
0NONE_na_crispri_207771	1018
0NONE_na_crispri_207774	452
0NONE_na_crispri_207777	2564
0NONE_na_crispri_207778	1942
0NONE_na_crispri_207780	2408
0NONE_na_crispri_207786	2934
0NONE_na_crispri_207788	3959
0NONE_na_crispri_207789	2218
0NONE_na_crispri_207793	1861
0NONE_na_crispri_207800	3428
0NONE_na_crispri_207803	1201
0NONE_na_crispri_207804	3279
0NONE_na_crispri_207805	2403
0NONE_na_crispri_207809	999
0NONE_na_crispri_207813	2131
0NONE_na_crispri_207814	2958
0NONE_na_crispri_207817	2816
0NONE_na_crispri_207819	1982
0NONE_na_crispri_207820	1582
0NONE_na_crispri_207821	2062
0NONE_na_crispri_207824	1257
0NONE_na_crispri_207830	2650
0NONE_na_crispri_207833	2389
0NONE_na_crispri_207834	2496
0NONE_na_crispri_207837	1651
0NONE_na_crispri_207838	1971
0NONE_na_crispri_207839	1465
0NONE_na_crispri_207843	1499
0NONE_na_crispri_207844	3253
0NONE_na_crispri_207845	2744
0NONE_na_crispri_207852	1836
0NONE_na_crispri_207853	181
0NONE_na_crispri_207857	2559
0NONE_na_crispri_207859	1578
0NONE_na_crispri_207870	3528
0NONE_na_crispri_207874	1949
0NONE_na_crispri_207875	1372
0NONE_na_crispri_207876	2500
0NONE_na_crispri_207878	1711
0NONE_na_crispri_207882	3423
0NONE_na_crispri_207889	2750
0NONE_na_crispri_207891	2697
0NONE_na_crispri_207893	2410
0NONE_na_crispri_207897	3438
0NONE_na_crispri_207900	2559
0NONE_na_crispri_207902	1411
0NONE_na_crispri_207909	2403
0NONE_na_crispri_207912	3872
0NONE_na_crispri_207913	1372
0NONE_na_crispri_207914	1867
0NONE_na_crispri_207915	3559
0NONE_na_crispri_207916	424
0NONE_na_crispri_207917	1883
0NONE_na_crispri_207918	2263
0NONE_na_crispri_207928	2267
0NONE_na_crispri_207931	3939
0NONE_na_crispri_207937	2905
0NONE_na_crispri_207942	2334
0NONE_na_crispri_207944	3063
0NONE_na_crispri_207945	2809
0NONE_na_crispri_207946	1872
0NONE_na_crispri_207948	2329
0NONE_na_crispri_207952	1591
0NONE_na_crispri_207956	1863
0NONE_na_crispri_207958	2128
0NONE_na_crispri_207960	2314
0NONE_na_crispri_207961	2245
0NONE_na_crispri_207971	2604
0NONE_na_crispri_207975	1620
0NONE_na_crispri_207977	3487
0NONE_na_crispri_207978	2433
0NONE_na_crispri_207982	1171
0NONE_na_crispri_207985	3487
0NONE_na_crispri_207991	4005
0NONE_na_crispri_207995	1438
0NONE_na_crispri_208000	1858
0NONE_na_crispri_208003	4426
0NONE_na_crispri_208004	1608
0NONE_na_crispri_208011	2149
0NONE_na_crispri_208016	1444
0NONE_na_crispri_208018	2116
0NONE_na_crispri_208019	4087
0NONE_na_crispri_208020	2336
0NONE_na_crispri_208027	2171
0NONE_na_crispri_208030	2043
0NONE_na_crispri_208040	2160
0NONE_na_crispri_208042	4269
0NONE_na_crispri_208044	2184
0NONE_na_crispri_208045	1135
0NONE_na_crispri_208046	3788
0NONE_na_crispri_208047	2578
0NONE_na_crispri_208050	2233
0NONE_na_crispri_208059	2359
0NONE_na_crispri_208060	1463
0NONE_na_crispri_208063	1666
0NONE_na_crispri_208068	804
0NONE_na_crispri_208069	2048
0NONE_na_crispri_208071	2037
0NONE_na_crispri_208072	2456
0NONE_na_crispri_208081	3209
0NONE_na_crispri_208082	2328
0NONE_na_crispri_208083	3709
0NONE_na_crispri_208085	3406
0NONE_na_crispri_208087	2864
0NONE_na_crispri_208091	3548
0NONE_na_crispri_208092	4090
0NONE_na_crispri_208093	367
0NONE_na_crispri_208103	2736
0NONE_na_crispri_208104	2
0NONE_na_crispri_208107	1682
0NONE_na_crispri_208110	4052
0NONE_na_crispri_208118	3095
0NONE_na_crispri_208120	2247
0NONE_na_crispri_208123	1542
0NONE_na_crispri_208127	2058
0NONE_na_crispri_208131	1600
0NONE_na_crispri_208135	1972
0NONE_na_crispri_208138	2065
0NONE_na_crispri_208139	3645
0NONE_na_crispri_208140	2178
0NONE_na_crispri_208142	1859
0NONE_na_crispri_208174	1859
0NONE_na_crispri_208175	1990
0NONE_na_crispri_208177	1343
0NONE_na_crispri_208180	1672
0NONE_na_crispri_208181	2522
0NONE_na_crispri_208184	2108
0NONE_na_crispri_208186	2366
0NONE_na_crispri_208191	1823
0NONE_na_crispri_208198	1600
0NONE_na_crispri_208202	2537
0NONE_na_crispri_208206	865
0NONE_na_crispri_208212	2177
0NONE_na_crispri_208219	2412
0NONE_na_crispri_208224	2600
0NONE_na_crispri_208229	4332
0NONE_na_crispri_208236	1582
0NONE_na_crispri_208237	2538
0NONE_na_crispri_208241	2315
0NONE_na_crispri_208255	3389
0NONE_na_crispri_208259	1809
0NONE_na_crispri_208261	4102
0NONE_na_crispri_208265	2195
0NONE_na_crispri_208267	3045
0NONE_na_crispri_208277	4019
0NONE_na_crispri_208278	3102
0NONE_na_crispri_208279	382
0NONE_na_crispri_208290	3627
0NONE_na_crispri_208294	1821
0NONE_na_crispri_208296	2934
0NONE_na_crispri_208297	3163
0NONE_na_crispri_208301	1861
0NONE_na_crispri_208308	2310
0NONE_na_crispri_208310	2421
0NONE_na_crispri_208313	2874
0NONE_na_crispri_208321	3628
0NONE_na_crispri_208330	1862
0NONE_na_crispri_208331	3743
0NONE_na_crispri_208336	2254
0NONE_na_crispri_208339	1906
0NONE_na_crispri_208342	722
0NONE_na_crispri_208343	1957
0NONE_na_crispri_208345	4068
0NONE_na_crispri_208351	1823
0NONE_na_crispri_208371	1763
0NONE_na_crispri_208377	3601
0NONE_na_crispri_208381	1707
0NONE_na_crispri_208383	1149
0NONE_na_crispri_208385	3964
0NONE_na_crispri_208386	1497
0NONE_na_crispri_208396	343
0NONE_na_crispri_208399	1789
0NONE_na_crispri_208403	2855
0NONE_na_crispri_208409	1987
0NONE_na_crispri_208417	2486
0NONE_na_crispri_208429	1046
0NONE_na_crispri_208434	3797
0NONE_na_crispri_208440	3383
0NONE_na_crispri_208446	2947
0NONE_na_crispri_208449	2245
0NONE_na_crispri_208455	3466
0NONE_na_crispri_208457	3041
0NONE_na_crispri_208463	2856
0NONE_na_crispri_208464	3394
0NONE_na_crispri_208465	5166
0NONE_na_crispri_208471	2700
0NONE_na_crispri_208473	2135
0NONE_na_crispri_208476	1297
0NONE_na_crispri_208482	2461
0NONE_na_crispri_208485	1769
0NONE_na_crispri_208487	1728
0NONE_na_crispri_208488	1739
0NONE_na_crispri_208490	1907
0NONE_na_crispri_208492	1687
0NONE_na_crispri_208493	1343
0NONE_na_crispri_208495	2381
0NONE_na_crispri_208500	2074
0NONE_na_crispri_208505	2903
0NONE_na_crispri_208514	2402
0NONE_na_crispri_208515	2917
0NONE_na_crispri_208518	1291
0NONE_na_crispri_208521	961
0NONE_na_crispri_208533	306
0NONE_na_crispri_208536	2222
0NONE_na_crispri_208543	3669
0NONE_na_crispri_208546	2778
0NONE_na_crispri_208547	3497
0NONE_na_crispri_208548	598
0NONE_na_crispri_208558	3036
0NONE_na_crispri_208559	2501
0NONE_na_crispri_208560	7306
0NONE_na_crispri_208561	2579
0NONE_na_crispri_208564	3147
0NONE_na_crispri_208565	1155
0NONE_na_crispri_208569	2470
0NONE_na_crispri_208572	2249
0NONE_na_crispri_208575	1484
0NONE_na_crispri_208578	1982
0NONE_na_crispri_208588	1942
0NONE_na_crispri_208589	2514
0NONE_na_crispri_208590	2837
0NONE_na_crispri_208608	33
0NONE_na_crispri_208610	3999
0NONE_na_crispri_208615	3100
0NONE_na_crispri_208616	2449
0NONE_na_crispri_208618	3888
0NONE_na_crispri_208619	2798
0NONE_na_crispri_208621	2744
0NONE_na_crispri_208627	2122
0NONE_na_crispri_208629	1870
0NONE_na_crispri_208633	2782
0NONE_na_crispri_208637	2308
0NONE_na_crispri_208640	4481
0NONE_na_crispri_208644	4580
0NONE_na_crispri_208646	2117
0NONE_na_crispri_208650	3205
0NONE_na_crispri_208652	1699
0NONE_na_crispri_208659	1569
0NONE_na_crispri_208660	3463
0NONE_na_crispri_208662	6343
0NONE_na_crispri_208665	2598
0NONE_na_crispri_208671	4284
0NONE_na_crispri_208678	2874
0NONE_na_crispri_208681	1720
0NONE_na_crispri_208685	2567
0NONE_na_crispri_208687	2833
0NONE_na_crispri_208689	2837
0NONE_na_crispri_208691	1681
0NONE_na_crispri_208694	341
0NONE_na_crispri_208700	3135
0NONE_na_crispri_208701	2453
0NONE_na_crispri_208702	3244
0NONE_na_crispri_208703	1552
0NONE_na_crispri_208707	3075
0NONE_na_crispri_208708	3188
0NONE_na_crispri_208715	1002
0NONE_na_crispri_208717	2344
0NONE_na_crispri_208720	2136
0NONE_na_crispri_208724	2389
0NONE_na_crispri_208734	1866
0NONE_na_crispri_208740	2276
0NONE_na_crispri_208747	1731
0NONE_na_crispri_208750	2312
0NONE_na_crispri_208753	1877
0NONE_na_crispri_208756	1344
0NONE_na_crispri_208758	2809
0NONE_na_crispri_208763	2132
0NONE_na_crispri_208766	2986
0NONE_na_crispri_208776	2219
0NONE_na_crispri_208777	2268
0NONE_na_crispri_208791	1130
0NONE_na_crispri_208796	2662
0NONE_na_crispri_208799	3574
0NONE_na_crispri_208803	1405
0NONE_na_crispri_208804	2521
0NONE_na_crispri_208805	3810
0NONE_na_crispri_208808	1891
0NONE_na_crispri_208810	2562
0NONE_na_crispri_208812	3977
0NONE_na_crispri_208813	2387
0NONE_na_crispri_208818	1816
0NONE_na_crispri_208819	2997
0NONE_na_crispri_208833	1248
0NONE_na_crispri_208834	1857
0NONE_na_crispri_208837	2689
0NONE_na_crispri_208839	2406
0NONE_na_crispri_208842	3557
0NONE_na_crispri_208843	1398
0NONE_na_crispri_208849	1866
0NONE_na_crispri_208850	1574
0NONE_na_crispri_208852	2163
0NONE_na_crispri_208859	2214
0NONE_na_crispri_208861	1615
0NONE_na_crispri_208871	2574
0NONE_na_crispri_208874	1222
0NONE_na_crispri_208877	2396
0NONE_na_crispri_208882	2516
0NONE_na_crispri_208901	2561
0NONE_na_crispri_208902	2004
0NONE_na_crispri_208903	1654
0NONE_na_crispri_208904	3370
0NONE_na_crispri_208906	2509
0NONE_na_crispri_208907	1536
0NONE_na_crispri_208909	1829
0NONE_na_crispri_208910	1774
0NONE_na_crispri_208912	2989
0NONE_na_crispri_208914	1251
0NONE_na_crispri_208918	958
0NONE_na_crispri_208926	3017
0NONE_na_crispri_208927	3553
0NONE_na_crispri_208929	2129
0NONE_na_crispri_208931	1003
0NONE_na_crispri_208934	454
0NONE_na_crispri_208936	2623
0NONE_na_crispri_208938	2241
0NONE_na_crispri_208944	2440
0NONE_na_crispri_208954	1837
0NONE_na_crispri_208958	2095
0NONE_na_crispri_208963	1989
0NONE_na_crispri_208969	1809
0NONE_na_crispri_208974	3274
0NONE_na_crispri_208977	1821
0NONE_na_crispri_208978	1856
0NONE_na_crispri_208992	2549
0NONE_na_crispri_208996	2246
0NONE_na_crispri_209000	2726
0NONE_na_crispri_209004	3679
0NONE_na_crispri_209006	3617
0NONE_na_crispri_209014	2126
0NONE_na_crispri_209016	1980
0NONE_na_crispri_209018	2081
0NONE_na_crispri_209021	1657
0NONE_na_crispri_209022	1999
0NONE_na_crispri_209027	1700
0NONE_na_crispri_209030	1945
0NONE_na_crispri_209033	2286
0NONE_na_crispri_209034	1670
0NONE_na_crispri_209036	3658
0NONE_na_crispri_209038	2397
0NONE_na_crispri_209042	1742
0NONE_na_crispri_209064	2521
0NONE_na_crispri_209065	3017
0NONE_na_crispri_209068	1925
0Safe_safe_ACOC_204555.4506	3102
0Safe_safe_ACOC_204560.4511	4004
0Safe_safe_ACOC_204571.4522	3743
0Safe_safe_ACOC_204575.4526	1042
0Safe_safe_ACOC_204590.4541	3162
0Safe_safe_ACOC_204599.4550	2308
0Safe_safe_ACOC_204608.4559	2749
0Safe_safe_ACOC_204611.4562	3511
0Safe_safe_ACOC_204625.4576	3521
0Safe_safe_ACOC_204627.4578	2736
0Safe_safe_ACOC_204629.4580	2579
0Safe_safe_ACOC_204632.4583	4787
0Safe_safe_ACOC_204663.4614	3891
0Safe_safe_ACOC_204669.4620	1101
0Safe_safe_ACOC_204672.4623	3146
0Safe_safe_ACOC_204678.4629	599
0Safe_safe_ACOC_204679.4630	2699
0Safe_safe_ACOC_204680.4631	3692
0Safe_safe_ACOC_204684.4635	5373
0Safe_safe_ACOC_204715.4666	2492
0Safe_safe_ACOC_204720.4671	4530
0Safe_safe_ACOC_204731.4682	3000
0Safe_safe_ACOC_204737.4688	3648
0Safe_safe_ACOC_204740.4691	3128
0Safe_safe_ACOC_204745.4696	2409
0Safe_safe_ACOC_204746.4697	2397
0Safe_safe_ACOC_204749.4700	2116
0Safe_safe_ACOC_204764.4715	3630
0Safe_safe_ACOC_204770.4721	3712
0Safe_safe_ACOC_204772.4723	4358
0Safe_safe_ACOC_204785.4736	2114
0Safe_safe_ACOC_204788.4739	4856
0Safe_safe_ACOC_204790.4741	3612
0Safe_safe_ACOC_204800.4751	2951
0Safe_safe_ACOC_204802.4753	2025
0Safe_safe_ACOC_204808.4759	1997
0Safe_safe_ACOC_204809.4760	4258
0Safe_safe_ACOC_204825.4776	3638
0Safe_safe_ACOC_204827.4778	2878
0Safe_safe_ACOC_204850.4801	3148
0Safe_safe_ACOC_204854.4805	2656
0Safe_safe_ACOC_204872.4823	1451
0Safe_safe_ACOC_204876.4827	4194
0Safe_safe_ACOC_204877.4828	3864
0Safe_safe_ACOC_204887.4838	2175
0Safe_safe_ACOC_204889.4840	2821
0Safe_safe_ACOC_204891.4842	2734
0Safe_safe_ACOC_204905.4856	2063
0Safe_safe_ACOC_204906.4857	2193
0Safe_safe_ACOC_204910.4861	3120
0Safe_safe_ACOC_204921.4872	3609
0Safe_safe_ACOC_204930.4881	2283
0Safe_safe_ACOC_204934.4885	2221
0Safe_safe_ACOC_204937.4888	1794
0Safe_safe_ACOC_204941.4892	2320
0Safe_safe_ACOC_204947.4898	2761
0Safe_safe_ACOC_204950.4901	3131
0Safe_safe_ACOC_204958.4909	2463
0Safe_safe_ACOC_204960.4911	3295
0Safe_safe_ACOC_204964.4915	4122
0Safe_safe_ACOC_204965.4916	3256
0Safe_safe_ACOC_204975.4926	3531
0Safe_safe_ACOC_205005.4956	3364
0Safe_safe_ACOC_205024.4975	3622
0Safe_safe_ACOC_205030.4981	2808
0Safe_safe_ACOC_205036.4987	2532
0Safe_safe_ACOC_205038.4989	2310
0Safe_safe_ACOC_205049.5000	2207
0Safe_safe_ACOC_205050.5001	5094
0Safe_safe_ACOC_205053.5004	4480
0Safe_safe_ACOC_205060.5011	2585
0Safe_safe_ACOC_205064.5015	2531
0Safe_safe_ACOC_205065.5016	4504
0Safe_safe_ACOC_205066.5017	3158
0Safe_safe_ACOC_205072.5023	2312
0Safe_safe_ACOC_205080.5031	2862
0Safe_safe_ACOC_205084.5035	3225
0Safe_safe_ACOC_205094.5045	2390
0Safe_safe_ACOC_205100.5051	3295
0Safe_safe_ACOC_205107.5058	2752
0Safe_safe_ACOC_205109.5060	3107
0Safe_safe_ACOC_205129.5080	2046
0Safe_safe_ACOC_205133.5084	2145
0Safe_safe_ACOC_205135.5086	2823
0Safe_safe_ACOC_205137.5088	3776
0Safe_safe_ACOC_205139.5090	2682
0Safe_safe_ACOC_205142.5093	3889
0Safe_safe_ACOC_205144.5095	4976
0Safe_safe_ACOC_205150.5101	3708
0Safe_safe_ACOC_205162.5113	2599
0Safe_safe_ACOC_205163.5114	4002
0Safe_safe_ACOC_205174.5125	3994
0Safe_safe_ACOC_205189.5140	3709
0Safe_safe_ACOC_205192.5143	2376
0Safe_safe_ACOC_205196.5147	3666
0Safe_safe_ACOC_205201.5152	3552
0Safe_safe_ACOC_205211.5162	4128
0Safe_safe_ACOC_205221.5172	3527
0Safe_safe_ACOC_205237.5188	3284
0Safe_safe_ACOC_205243.5194	3042
0Safe_safe_ACOC_205250.5201	3022
0Safe_safe_ACOC_205261.5212	3287
0Safe_safe_ACOC_205265.5216	4321
0Safe_safe_ACOC_205270.5221	1970
0Safe_safe_ACOC_205272.5223	3308
0Safe_safe_ACOC_205278.5229	2633
0Safe_safe_ACOC_205285.5236	2630
0Safe_safe_ACOC_205297.5248	3460
0Safe_safe_ACOC_205299.5250	2800
0Safe_safe_DTKP_205310.5261	2344
0Safe_safe_DTKP_205314.5265	2358
0Safe_safe_DTKP_205318.5269	2087
0Safe_safe_DTKP_205319.5270	4211
0Safe_safe_DTKP_205324.5275	4288
0Safe_safe_DTKP_205325.5276	3588
0Safe_safe_DTKP_205340.5291	3462
0Safe_safe_DTKP_205341.5292	3282
0Safe_safe_DTKP_205342.5293	2920
0Safe_safe_DTKP_205343.5294	1549
0Safe_safe_DTKP_205348.5299	2069
0Safe_safe_DTKP_205368.5319	2413
0Safe_safe_DTKP_205373.5324	3259
0Safe_safe_DTKP_205380.5331	4993
0Safe_safe_DTKP_205390.5341	3300
0Safe_safe_DTKP_205391.5342	2616
0Safe_safe_DTKP_205392.5343	3420
0Safe_safe_DTKP_205393.5344	752
0Safe_safe_DTKP_205411.5362	2280
0Safe_safe_DTKP_205422.5373	2446
0Safe_safe_DTKP_205423.5374	2779
0Safe_safe_DTKP_205424.5375	2788
0Safe_safe_DTKP_205448.5399	4361
0Safe_safe_DTKP_205449.5400	4573
0Safe_safe_DTKP_205477.5428	3343
0Safe_safe_DTKP_205480.5431	3504
0Safe_safe_DTKP_205483.5434	2120
0Safe_safe_DTKP_205488.5439	4677
0Safe_safe_DTKP_205490.5441	4024
0Safe_safe_DTKP_205492.5443	2733
0Safe_safe_DTKP_205504.5455	2037
0Safe_safe_DTKP_205505.5456	2289
0Safe_safe_DTKP_205509.5460	3280
0Safe_safe_DTKP_205511.5462	3378
0Safe_safe_DTKP_205513.5464	2606
0Safe_safe_DTKP_205521.5472	2738
0Safe_safe_DTKP_205529.5480	3765
0Safe_safe_DTKP_205533.5484	2761
0Safe_safe_DTKP_205538.5489	2288
0Safe_safe_DTKP_205539.5490	1580
0Safe_safe_DTKP_205542.5493	4501
0Safe_safe_DTKP_205543.5494	4583
0Safe_safe_DTKP_205554.5505	6147
0Safe_safe_DTKP_205556.5507	3019
0Safe_safe_DTKP_205558.5509	3944
0Safe_safe_DTKP_205562.5513	5293
0Safe_safe_DTKP_205563.5514	2432
0Safe_safe_DTKP_205569.5520	1604
0Safe_safe_DTKP_205574.5525	1095
0Safe_safe_DTKP_205581.5532	1699
0Safe_safe_DTKP_205584.5535	3838
0Safe_safe_DTKP_205585.5536	3647
0Safe_safe_DTKP_205591.5542	1976
0Safe_safe_DTKP_205599.5550	3132
0Safe_safe_DTKP_205613.5564	1383
0Safe_safe_DTKP_205620.5571	5337
0Safe_safe_DTKP_205640.5591	1980
0Safe_safe_DTKP_205681.5632	2221
0Safe_safe_DTKP_205686.5637	3879
0Safe_safe_DTKP_205711.5662	3554
0Safe_safe_DTKP_205718.5669	5452
0Safe_safe_DTKP_205723.5674	2129
0Safe_safe_DTKP_205727.5678	1888
0Safe_safe_DTKP_205733.5684	2042
0Safe_safe_DTKP_205749.5700	3348
0Safe_safe_DTKP_205753.5704	4204
0Safe_safe_DTKP_205761.5712	2245
0Safe_safe_DTKP_205768.5719	3873
0Safe_safe_DTKP_205774.5725	3411
0Safe_safe_DTKP_205778.5729	2373
0Safe_safe_DTKP_205789.5740	3999
0Safe_safe_DTKP_205790.5741	2090
0Safe_safe_DTKP_205794.5745	4429
0Safe_safe_DTKP_205803.5754	1761
0Safe_safe_DTKP_205818.5769	2556
0Safe_safe_DTKP_205820.5771	2924
0Safe_safe_DTKP_205822.5773	1249
0Safe_safe_DTKP_205839.5790	4397
0Safe_safe_DTKP_205872.5823	3112
0Safe_safe_DTKP_205877.5828	2782
0Safe_safe_DTKP_205884.5835	4002
0Safe_safe_DTKP_205900.5851	3790
0Safe_safe_DTKP_205926.5877	2454
0Safe_safe_DTKP_205940.5891	2873
0Safe_safe_DTKP_205944.5895	2313
0Safe_safe_DTKP_205950.5901	5496
0Safe_safe_DTKP_205963.5914	3370
0Safe_safe_DTKP_205983.5934	3815
0Safe_safe_DTKP_205986.5937	4048
0Safe_safe_DTKP_205988.5939	2824
0Safe_safe_DTKP_205992.5943	2240
0Safe_safe_DTKP_205998.5949	2377
0Safe_safe_DTKP_206016.5967	3165
0Safe_safe_DTKP_206017.5968	2090
0Safe_safe_DTKP_206021.5972	3470
0Safe_safe_DTKP_206023.5974	2678
0Safe_safe_DTKP_206030.5981	3141
0Safe_safe_DTKP_206036.5987	3252
0Safe_safe_DTKP_206045.5996	3798
0Safe_safe_DTKP_206046.5997	3710
0Safe_safe_GEEX_206053.1504	3757
0Safe_safe_GEEX_206056.1507	5259
0Safe_safe_GEEX_206061.1512	3451
0Safe_safe_GEEX_206067.1518	4724
0Safe_safe_GEEX_206081.1532	3769
0Safe_safe_GEEX_206095.1546	2597
0Safe_safe_GEEX_206113.1564	1382
0Safe_safe_GEEX_206119.1570	2554
0Safe_safe_GEEX_206123.1574	2391
0Safe_safe_GEEX_206125.1576	2147
0Safe_safe_GEEX_206126.1577	4899
0Safe_safe_GEEX_206141.1592	4624
0Safe_safe_GEEX_206146.1597	3629
0Safe_safe_GEEX_206147.1598	4100
0Safe_safe_GEEX_206148.1599	3028
0Safe_safe_GEEX_206149.1600	2365
0Safe_safe_GEEX_206154.1605	2840
0Safe_safe_GEEX_206155.1606	1051
0Safe_safe_GEEX_206156.1607	3825
0Safe_safe_GEEX_206164.1615	4707
0Safe_safe_GEEX_206167.1618	4222
0Safe_safe_GEEX_206170.1621	3183
0Safe_safe_GEEX_206192.1643	3567
0Safe_safe_GEEX_206199.1650	3463
0Safe_safe_GEEX_206206.1657	2893
0Safe_safe_GEEX_206210.1661	3035
0Safe_safe_GEEX_206217.1668	4624
0Safe_safe_GEEX_206232.1683	3660
0Safe_safe_GEEX_206235.1686	4144
0Safe_safe_GEEX_206236.1687	2314
0Safe_safe_GEEX_206238.1689	4257
0Safe_safe_GEEX_206242.1693	1164
0Safe_safe_GEEX_206243.1694	3424
0Safe_safe_GEEX_206251.1702	2362
0Safe_safe_GEEX_206253.1704	4272
0Safe_safe_GEEX_206254.1705	2708
0Safe_safe_GEEX_206258.1709	2173
0Safe_safe_GEEX_206259.1710	2406
0Safe_safe_GEEX_206268.1719	3771
0Safe_safe_GEEX_206273.1724	2787
0Safe_safe_GEEX_206276.1727	2320
0Safe_safe_GEEX_206290.1741	2214
0Safe_safe_GEEX_206293.1744	4565
0Safe_safe_GEEX_206294.1745	2272
0Safe_safe_GEEX_206301.1752	2796
0Safe_safe_GEEX_206305.1756	4560
0Safe_safe_GEEX_206311.1762	1603
0Safe_safe_GEEX_206321.1772	2094
0Safe_safe_GEEX_206325.1776	4268
0Safe_safe_GEEX_206329.1780	2782
0Safe_safe_GEEX_206335.1786	2254
0Safe_safe_GEEX_206336.1787	3538
0Safe_safe_GEEX_206338.1789	2027
0Safe_safe_GEEX_206346.1797	2183
0Safe_safe_GEEX_206352.1803	4087
0Safe_safe_GEEX_206359.1810	2808
0Safe_safe_GEEX_206374.1825	2090
0Safe_safe_GEEX_206375.1826	4322
0Safe_safe_GEEX_206383.1834	3148
0Safe_safe_GEEX_206391.1842	2652
0Safe_safe_GEEX_206394.1845	4209
0Safe_safe_GEEX_206399.1850	4673
0Safe_safe_GEEX_206400.1851	2401
0Safe_safe_GEEX_206405.1856	5412
0Safe_safe_GEEX_206411.1862	4227
0Safe_safe_GEEX_206415.1866	2437
0Safe_safe_GEEX_206417.1868	2768
0Safe_safe_GEEX_206421.1872	3473
0Safe_safe_GEEX_206440.1891	4501
0Safe_safe_GEEX_206443.1894	5346
0Safe_safe_GEEX_206445.1896	4226
0Safe_safe_GEEX_206451.1902	2810
0Safe_safe_GEEX_206463.1914	3155
0Safe_safe_GEEX_206501.1952	3826
0Safe_safe_GEEX_206502.1953	3611
0Safe_safe_GEEX_206507.1958	3552
0Safe_safe_GEEX_206510.1961	1216
0Safe_safe_GEEX_206522.1973	2600
0Safe_safe_GEEX_206526.1977	3212
0Safe_safe_GEEX_206530.1981	2989
0Safe_safe_GEEX_206541.1992	2454
0Safe_safe_GEEX_206547.1998	3508
0Safe_safe_GEEX_206551.2002	4452
0Safe_safe_GEEX_206552.2003	2535
0Safe_safe_GEEX_206553.2004	3749
0Safe_safe_GEEX_206557.2008	3141
0Safe_safe_GEEX_206565.2016	1764
0Safe_safe_GEEX_206580.2031	3769
0Safe_safe_GEEX_206583.2034	4594
0Safe_safe_GEEX_206585.2036	3018
0Safe_safe_GEEX_206587.2038	4098
0Safe_safe_GEEX_206588.2039	3157
0Safe_safe_GEEX_206597.2048	3560
0Safe_safe_GEEX_206613.2064	2324
0Safe_safe_GEEX_206626.2077	4641
0Safe_safe_GEEX_206642.2093	2263
0Safe_safe_GEEX_206648.2099	2938
0Safe_safe_GEEX_206649.2100	2915
0Safe_safe_GEEX_206676.2127	4744
0Safe_safe_GEEX_206685.2136	3240
0Safe_safe_GEEX_206705.2156	3292
0Safe_safe_GEEX_206720.2171	2300
0Safe_safe_GEEX_206730.2181	2365
0Safe_safe_GEEX_206731.2182	2458
0Safe_safe_GEEX_206743.2194	2087
0Safe_safe_GEEX_206747.2198	2417
0Safe_safe_GEEX_206753.2204	2055
0Safe_safe_GEEX_206760.2211	4267
0Safe_safe_GEEX_206774.2225	2941
0Safe_safe_GEEX_206778.2229	986
0Safe_safe_GEEX_206781.2232	4277
0Safe_safe_GEEX_206784.2235	2966
0Safe_safe_GEEX_206792.2243	3069
0Safe_safe_GEEX_206793.2244	2838
0Safe_safe_MEPR_206803.1003	3487
0Safe_safe_MEPR_206804.1004	3045
0Safe_safe_MEPR_206807.1007	2900
0Safe_safe_MEPR_206810.1010	2377
0Safe_safe_MEPR_206814.1014	4717
0Safe_safe_MEPR_206826.1026	4474
0Safe_safe_MEPR_206827.1027	3422
0Safe_safe_MEPR_206843.1043	3046
0Safe_safe_MEPR_206857.1057	4273
0Safe_safe_MEPR_206859.1059	4362
0Safe_safe_MEPR_206869.1069	3145
0Safe_safe_MEPR_206870.1070	2515
0Safe_safe_MEPR_206876.1076	3004
0Safe_safe_MEPR_206891.1091	3660
0Safe_safe_MEPR_206892.1092	3681
0Safe_safe_MEPR_206896.1096	1794
0Safe_safe_MEPR_206901.1101	3865
0Safe_safe_MEPR_206914.1114	3203
0Safe_safe_MEPR_206916.1116	2770
0Safe_safe_MEPR_206918.1118	2696
0Safe_safe_MEPR_206921.1121	3180
0Safe_safe_MEPR_206930.1130	1747
0Safe_safe_MEPR_206935.1135	3866
0Safe_safe_MEPR_206938.1138	3094
0Safe_safe_MEPR_206951.1151	4380
0Safe_safe_MEPR_206960.1160	3189
0Safe_safe_MEPR_206961.1161	1548
0Safe_safe_MEPR_206965.1165	3309
0Safe_safe_MEPR_206968.1168	1106
0Safe_safe_MEPR_206970.1170	4985
0Safe_safe_MEPR_206976.1176	3166
0Safe_safe_MEPR_206979.1179	3032
0Safe_safe_MEPR_206983.1183	2767
0Safe_safe_MEPR_206989.1189	1933
0Safe_safe_MEPR_207012.1212	3695
0Safe_safe_MEPR_207015.1215	2686
0Safe_safe_MEPR_207019.1219	3898
0Safe_safe_MEPR_207025.1225	2100
0Safe_safe_MEPR_207028.1228	3432
0Safe_safe_MEPR_207030.1230	604
0Safe_safe_MEPR_207031.1231	2643
0Safe_safe_MEPR_207036.1236	3330
0Safe_safe_MEPR_207037.1237	2795
0Safe_safe_MEPR_207042.1242	1872
0Safe_safe_MEPR_207045.1245	3702
0Safe_safe_MEPR_207057.1257	3905
0Safe_safe_MEPR_207060.1260	4013
0Safe_safe_MEPR_207070.1270	2326
0Safe_safe_MEPR_207071.1271	2604
0Safe_safe_MEPR_207073.1273	2179
0Safe_safe_MEPR_207101.1301	1402
0Safe_safe_MEPR_207106.1306	988
0Safe_safe_MEPR_207108.1308	3109
0Safe_safe_MEPR_207112.1312	1897
0Safe_safe_MEPR_207133.1333	3064
0Safe_safe_MEPR_207148.1348	4320
0Safe_safe_MEPR_207151.1351	3934
0Safe_safe_MEPR_207158.1358	2357
0Safe_safe_MEPR_207162.1362	1612
0Safe_safe_MEPR_207168.1368	4456
0Safe_safe_MEPR_207169.1369	2202
0Safe_safe_MEPR_207173.1373	2474
0Safe_safe_MEPR_207175.1375	1792
0Safe_safe_MEPR_207181.1381	3770
0Safe_safe_MEPR_207196.1396	6343
0Safe_safe_MEPR_207198.1398	3780
0Safe_safe_MEPR_207203.1403	2414
0Safe_safe_MEPR_207215.1415	2635
0Safe_safe_MEPR_207254.1454	3694
0Safe_safe_MEPR_207260.1460	3271
0Safe_safe_MEPR_207271.1471	4265
0Safe_safe_MEPR_207273.1473	3595
0Safe_safe_MEPR_207276.1476	3920
0Safe_safe_MEPR_207297.1497	1268
0Safe_safe_MEPR_207300.1500	4760
0Safe_safe_MEPR_207304.754	3879
0Safe_safe_MEPR_207323.773	3929
0Safe_safe_MEPR_207325.775	5955
0Safe_safe_MEPR_207329.779	4181
0Safe_safe_MEPR_207331.781	2879
0Safe_safe_MEPR_207334.784	2304
0Safe_safe_MEPR_207339.789	420
0Safe_safe_MEPR_207347.797	2833
0Safe_safe_MEPR_207348.798	3523
0Safe_safe_MEPR_207351.801	1208
0Safe_safe_MEPR_207381.831	1446
0Safe_safe_MEPR_207386.836	1980
0Safe_safe_MEPR_207387.837	5131
0Safe_safe_MEPR_207389.839	5211
0Safe_safe_MEPR_207392.842	2880
0Safe_safe_MEPR_207397.847	3920
0Safe_safe_MEPR_207402.852	4829
0Safe_safe_MEPR_207413.863	3085
0Safe_safe_MEPR_207414.864	3479
0Safe_safe_MEPR_207429.879	5420
0Safe_safe_MEPR_207454.904	3674
0Safe_safe_MEPR_207455.905	3004
0Safe_safe_MEPR_207456.906	1626
0Safe_safe_MEPR_207462.912	5167
0Safe_safe_MEPR_207467.917	3308
0Safe_safe_MEPR_207471.921	2979
0Safe_safe_MEPR_207478.928	4354
0Safe_safe_MEPR_207481.931	1312
0Safe_safe_MEPR_207484.934	2026
0Safe_safe_MEPR_207486.936	1207
0Safe_safe_MEPR_207487.937	2574
0Safe_safe_MEPR_207488.938	2971
0Safe_safe_MEPR_207490.940	1423
0Safe_safe_MEPR_207491.941	2155
0Safe_safe_MEPR_207494.944	1737
0Safe_safe_MEPR_207495.945	1803
0Safe_safe_MEPR_207497.947	2193
0Safe_safe_MEPR_207500.950	4875
0Safe_safe_MEPR_207502.952	3106
0Safe_safe_MEPR_207518.968	2059
0Safe_safe_MEPR_207534.984	3247
0Safe_safe_MEPR_207542.992	3420
0Safe_safe_MEPR_207544.994	2511
0Safe_safe_PROT_207550.2251	4588
0Safe_safe_PROT_207553.2254	3097
0Safe_safe_PROT_207554.2255	2237
0Safe_safe_PROT_207559.2260	1258
0Safe_safe_PROT_207566.2267	3115
0Safe_safe_PROT_207578.2279	3202
0Safe_safe_PROT_207581.2282	2644
0Safe_safe_PROT_207597.2298	2026
0Safe_safe_PROT_207600.2301	2713
0Safe_safe_PROT_207604.2305	3987
0Safe_safe_PROT_207605.2306	4707
0Safe_safe_PROT_207610.2311	1634
0Safe_safe_PROT_207611.2312	2890
0Safe_safe_PROT_207617.2318	1732
0Safe_safe_PROT_207628.2329	2272
0Safe_safe_PROT_207631.2332	2948
0Safe_safe_PROT_207634.2335	3145
0Safe_safe_PROT_207643.2344	3975
0Safe_safe_PROT_207645.2346	3280
0Safe_safe_PROT_207653.2354	4380
0Safe_safe_PROT_207662.2363	4612
0Safe_safe_PROT_207675.2376	2772
0Safe_safe_PROT_207698.2399	2822
0Safe_safe_PROT_207700.2401	5368
0Safe_safe_PROT_207702.2403	1784
0Safe_safe_PROT_207703.2404	3155
0Safe_safe_PROT_207730.2431	2575
0Safe_safe_PROT_207734.2435	3038
0Safe_safe_PROT_207736.2437	2887
0Safe_safe_PROT_207737.2438	5678
0Safe_safe_PROT_207739.2440	2237
0Safe_safe_PROT_207741.2442	1505
0Safe_safe_PROT_207786.2487	2888
0Safe_safe_PROT_207794.2495	331
0Safe_safe_PROT_207801.2502	1566
0Safe_safe_PROT_207802.2503	4741
0Safe_safe_PROT_207827.2528	3421
0Safe_safe_PROT_207833.2534	2523
0Safe_safe_PROT_207836.2537	1605
0Safe_safe_PROT_207841.2542	2062
0Safe_safe_PROT_207844.2545	4644
0Safe_safe_PROT_207847.2548	3146
0Safe_safe_PROT_207854.2555	2989
0Safe_safe_PROT_207862.2563	3371
0Safe_safe_PROT_207863.2564	3092
0Safe_safe_PROT_207876.2577	1934
0Safe_safe_PROT_207878.2579	4141
0Safe_safe_PROT_207887.2588	1284
0Safe_safe_PROT_207896.2597	3038
0Safe_safe_PROT_207901.2602	1931
0Safe_safe_PROT_207908.2609	2201
0Safe_safe_PROT_207912.2613	4050
0Safe_safe_PROT_207914.2615	3660
0Safe_safe_PROT_207916.2617	2353
0Safe_safe_PROT_207926.2627	3694
0Safe_safe_PROT_207928.2629	2137
0Safe_safe_PROT_207931.2632	3294
0Safe_safe_PROT_207932.2633	2896
0Safe_safe_PROT_207933.2634	5570
0Safe_safe_PROT_207936.2637	3082
0Safe_safe_PROT_207937.2638	2195
0Safe_safe_PROT_207949.2650	2922
0Safe_safe_PROT_207952.2653	2136
0Safe_safe_PROT_207960.2661	3364
0Safe_safe_PROT_207962.2663	2525
0Safe_safe_PROT_207973.2674	3662
0Safe_safe_PROT_207980.2681	6016
0Safe_safe_PROT_207983.2684	3116
0Safe_safe_PROT_207986.2687	4814
0Safe_safe_PROT_207990.2691	3569
0Safe_safe_PROT_207992.2693	3377
0Safe_safe_PROT_208008.2709	2431
0Safe_safe_PROT_208009.2710	3304
0Safe_safe_PROT_208013.2714	4295
0Safe_safe_PROT_208021.2722	2340
0Safe_safe_PROT_208030.2731	2825
0Safe_safe_PROT_208031.2732	2823
0Safe_safe_PROT_208032.2733	3043
0Safe_safe_PROT_208035.2736	3762
0Safe_safe_PROT_208041.2742	2563
0Safe_safe_PROT_208044.2745	3314
0Safe_safe_PROT_208046.2747	2679
0Safe_safe_PROT_208050.2751	2468
0Safe_safe_PROT_208051.2752	3038
0Safe_safe_PROT_208054.2755	3101
0Safe_safe_PROT_208062.2763	4232
0Safe_safe_PROT_208082.2783	1016
0Safe_safe_PROT_208086.2787	3186
0Safe_safe_PROT_208087.2788	5644
0Safe_safe_PROT_208095.2796	4847
0Safe_safe_PROT_208096.2797	1881
0Safe_safe_PROT_208101.2802	5075
0Safe_safe_PROT_208106.2807	3000
0Safe_safe_PROT_208111.2812	2896
0Safe_safe_PROT_208127.2828	5660
0Safe_safe_PROT_208148.2849	2848
0Safe_safe_PROT_208165.2866	3695
0Safe_safe_PROT_208166.2867	2733
0Safe_safe_PROT_208174.2875	2259
0Safe_safe_PROT_208177.2878	3698
0Safe_safe_PROT_208180.2881	3756
0Safe_safe_PROT_208181.2882	3163
0Safe_safe_PROT_208190.2891	2376
0Safe_safe_PROT_208213.2914	3232
0Safe_safe_PROT_208219.2920	3919
0Safe_safe_PROT_208220.2921	1595
0Safe_safe_PROT_208222.2923	5809
0Safe_safe_PROT_208232.2933	2781
0Safe_safe_PROT_208233.2934	5125
0Safe_safe_PROT_208235.2936	2966
0Safe_safe_PROT_208237.2938	6860
0Safe_safe_PROT_208247.2948	4393
0Safe_safe_PROT_208248.2949	2116
0Safe_safe_PROT_208262.2963	2784
0Safe_safe_PROT_208263.2964	4255
0Safe_safe_PROT_208267.2968	3306
0Safe_safe_PROT_208268.2969	3078
0Safe_safe_PROT_208269.2970	3728
0Safe_safe_PROT_208276.2977	2482
0Safe_safe_PROT_208288.2989	4023
0Safe_safe_PROT_208299.3000	4143
0Safe_safe_TMMO_208300.1	1824
0Safe_safe_TMMO_208309.107	4534
0Safe_safe_TMMO_208317.114	5059
0Safe_safe_TMMO_208324.120	4212
0Safe_safe_TMMO_208335.130	3192
0Safe_safe_TMMO_208340.135	3285
0Safe_safe_TMMO_208349.143	3442
0Safe_safe_TMMO_208368.160	5244
0Safe_safe_TMMO_208381.172	2538
0Safe_safe_TMMO_208382.173	3530
0Safe_safe_TMMO_208393.183	2576
0Safe_safe_TMMO_208399.189	4588
0Safe_safe_TMMO_208401.190	3354
0Safe_safe_TMMO_208403.192	3457
0Safe_safe_TMMO_208410.199	1876
0Safe_safe_TMMO_208416.203	2801
0Safe_safe_TMMO_208429.215	1349
0Safe_safe_TMMO_208438.223	2975
0Safe_safe_TMMO_208439.224	5096
0Safe_safe_TMMO_208451.235	3769
0Safe_safe_TMMO_208454.238	2672
0Safe_safe_TMMO_208475.257	3630
0Safe_safe_TMMO_208485.266	1997
0Safe_safe_TMMO_208492.272	4302
0Safe_safe_TMMO_208506.285	4753
0Safe_safe_TMMO_208531.307	2452
0Safe_safe_TMMO_208535.310	2057
0Safe_safe_TMMO_208541.316	2689
0Safe_safe_TMMO_208549.323	5156
0Safe_safe_TMMO_208574.346	3583
0Safe_safe_TMMO_208576.348	5704
0Safe_safe_TMMO_208577.349	3655
0Safe_safe_TMMO_208582.353	4121
0Safe_safe_TMMO_208583.354	4061
0Safe_safe_TMMO_208590.360	4025
0Safe_safe_TMMO_208611.38	2422
0Safe_safe_TMMO_208614.382	2037
0Safe_safe_TMMO_208616.384	2903
0Safe_safe_TMMO_208618.386	2796
0Safe_safe_TMMO_208628.395	4327
0Safe_safe_TMMO_208630.397	1749
0Safe_safe_TMMO_208631.398	5145
0Safe_safe_TMMO_208634.40	1546
0Safe_safe_TMMO_208649.413	2699
0Safe_safe_TMMO_208654.418	2886
0Safe_safe_TMMO_208657.420	2431
0Safe_safe_TMMO_208677.439	2897
0Safe_safe_TMMO_208691.451	2561
0Safe_safe_TMMO_208697.457	3526
0Safe_safe_TMMO_208704.463	3713
0Safe_safe_TMMO_208707.466	442
0Safe_safe_TMMO_208710.469	2366
0Safe_safe_TMMO_208724.481	2975
0Safe_safe_TMMO_208726.483	3307
0Safe_safe_TMMO_208727.484	2490
0Safe_safe_TMMO_208730.487	3253
0Safe_safe_TMMO_208735.491	3403
0Safe_safe_TMMO_208737.493	4318
0Safe_safe_TMMO_208739.495	1079
0Safe_safe_TMMO_208756.51	3602
0Safe_safe_TMMO_208773.525	4537
0Safe_safe_TMMO_208778.53	4063
0Safe_safe_TMMO_208786.537	3403
0Safe_safe_TMMO_208793.543	3090
0Safe_safe_TMMO_208794.544	2267
0Safe_safe_TMMO_208799.549	3459
0Safe_safe_TMMO_208802.551	2590
0Safe_safe_TMMO_208805.554	3913
0Safe_safe_TMMO_208812.560	3390
0Safe_safe_TMMO_208831.578	2589
0Safe_safe_TMMO_208832.579	3068
0Safe_safe_TMMO_208854.599	4229
0Safe_safe_TMMO_208867.61	4177
0Safe_safe_TMMO_208868.610	3498
0Safe_safe_TMMO_208882.623	2502
0Safe_safe_TMMO_208886.627	2964
0Safe_safe_TMMO_208911.65	3227
0Safe_safe_TMMO_208913.651	3566
0Safe_safe_TMMO_208917.655	5020
0Safe_safe_TMMO_208918.656	4251
0Safe_safe_TMMO_208919.657	1191
0Safe_safe_TMMO_208926.663	5959
0Safe_safe_TMMO_208939.675	4843
0Safe_safe_TMMO_208947.682	2841
0Safe_safe_TMMO_208958.692	3086
0Safe_safe_TMMO_208962.696	3158
0Safe_safe_TMMO_208963.697	1363
0Safe_safe_TMMO_208980.711	2653
0Safe_safe_TMMO_208983.714	3401
0Safe_safe_TMMO_208990.720	2933
0Safe_safe_TMMO_208993.723	3031
0Safe_safe_TMMO_208997.727	2891
0Safe_safe_TMMO_209005.734	1455
0Safe_safe_TMMO_209012.740	2349
0Safe_safe_TMMO_209013.741	2341
0Safe_safe_TMMO_209016.744	2631
0Safe_safe_TMMO_209019.747	3545
0Safe_safe_TMMO_209022.75	2834
0Safe_safe_TMMO_209024.76	4516
0Safe_safe_TMMO_209025.77	3600
0Safe_safe_TMMO_209031.82	3420
0Safe_safe_TMMO_209036.87	1228
0Safe_safe_TMMO_209039.9	3542
0Safe_safe_TMMO_209043.93	2684
0Safe_safe_UNA1_209066.3767	3780
0Safe_safe_UNA1_209072.3773	3578
0Safe_safe_UNA1_209089.3790	3624
0Safe_safe_UNA1_209095.3796	3589
0Safe_safe_UNA1_209107.3808	3159
0Safe_safe_UNA1_209114.3815	3190
0Safe_safe_UNA1_209119.3820	2657
0Safe_safe_UNA1_209126.3827	2256
0Safe_safe_UNA1_209127.3828	2935
0Safe_safe_UNA1_209137.3838	1709
0Safe_safe_UNA1_209150.3851	2718
0Safe_safe_UNA1_209153.3854	4375
0Safe_safe_UNA1_209162.3863	4293
0Safe_safe_UNA1_209166.3867	4187
0Safe_safe_UNA1_209181.3882	2576
0Safe_safe_UNA1_209182.3883	1289
0Safe_safe_UNA1_209187.3888	2085
0Safe_safe_UNA1_209191.3892	3316
0Safe_safe_UNA1_209192.3893	2616
0Safe_safe_UNA1_209194.3895	3066
0Safe_safe_UNA1_209198.3899	2650
0Safe_safe_UNA1_209205.3906	4515
0Safe_safe_UNA1_209206.3907	2240
0Safe_safe_UNA1_209208.3909	4470
0Safe_safe_UNA1_209212.3913	3822
0Safe_safe_UNA1_209217.3918	97
0Safe_safe_UNA1_209218.3919	1894
0Safe_safe_UNA1_209236.3937	5725
0Safe_safe_UNA1_209245.3946	3137
0Safe_safe_UNA1_209266.3967	4837
0Safe_safe_UNA1_209280.3981	2011
0Safe_safe_UNA1_209283.3984	2457
0Safe_safe_UNA1_209289.3990	3345
0Safe_safe_UNA1_209292.3993	2207
0Safe_safe_UNA1_209294.3995	4914
0Safe_safe_UNA1_209313.4014	3396
0Safe_safe_UNA1_209320.4021	3675
0Safe_safe_UNA1_209331.4032	3784
0Safe_safe_UNA1_209340.4041	3464
0Safe_safe_UNA1_209344.4045	4828
0Safe_safe_UNA1_209349.4050	2425
0Safe_safe_UNA1_209352.4053	4141
0Safe_safe_UNA1_209353.4054	3076
0Safe_safe_UNA1_209355.4056	862
0Safe_safe_UNA1_209358.4059	2287
0Safe_safe_UNA1_209365.4066	2599
0Safe_safe_UNA1_209366.4067	2894
0Safe_safe_UNA1_209372.4073	2192
0Safe_safe_UNA1_209373.4074	3217
0Safe_safe_UNA1_209380.4081	5121
0Safe_safe_UNA1_209387.4088	3107
0Safe_safe_UNA1_209411.4112	3130
0Safe_safe_UNA1_209413.4114	4413
0Safe_safe_UNA1_209424.4125	3518
0Safe_safe_UNA1_209433.4134	2628
0Safe_safe_UNA1_209436.4137	3033
0Safe_safe_UNA1_209441.4142	3150
0Safe_safe_UNA1_209445.4146	2357
0Safe_safe_UNA1_209446.4147	3547
0Safe_safe_UNA1_209464.4165	1059
0Safe_safe_UNA1_209467.4168	3181
0Safe_safe_UNA1_209471.4172	1551
0Safe_safe_UNA1_209473.4174	2270
0Safe_safe_UNA1_209474.4175	3054
0Safe_safe_UNA1_209477.4178	4118
0Safe_safe_UNA1_209479.4180	2421
0Safe_safe_UNA1_209485.4186	2913
0Safe_safe_UNA1_209487.4188	2343
0Safe_safe_UNA1_209508.4209	3782
0Safe_safe_UNA1_209510.4211	2431
0Safe_safe_UNA1_209513.4214	2794
0Safe_safe_UNA1_209517.4218	4156
0Safe_safe_UNA1_209523.4224	1845
0Safe_safe_UNA1_209524.4225	3306
0Safe_safe_UNA1_209525.4226	3273
0Safe_safe_UNA1_209533.4234	4329
0Safe_safe_UNA1_209546.4247	5147
0Safe_safe_UNA1_209548.4249	2379
0Safe_safe_UNA1_209564.4265	3504
0Safe_safe_UNA1_209580.4281	4579
0Safe_safe_UNA1_209583.4284	4416
0Safe_safe_UNA1_209591.4292	1212
0Safe_safe_UNA1_209595.4296	1938
0Safe_safe_UNA1_209603.4304	1900
0Safe_safe_UNA1_209608.4309	3682
0Safe_safe_UNA1_209612.4313	3592
0Safe_safe_UNA1_209627.4328	2868
0Safe_safe_UNA1_209631.4332	3093
0Safe_safe_UNA1_209633.4334	2146
0Safe_safe_UNA1_209639.4340	5022
0Safe_safe_UNA1_209642.4343	3534
0Safe_safe_UNA1_209645.4346	3184
0Safe_safe_UNA1_209646.4347	3597
0Safe_safe_UNA1_209661.4362	1959
0Safe_safe_UNA1_209678.4379	2955
0Safe_safe_UNA1_209684.4385	2566
0Safe_safe_UNA1_209685.4386	3781
0Safe_safe_UNA1_209692.4393	2975
0Safe_safe_UNA1_209693.4394	4535
0Safe_safe_UNA1_209702.4403	2989
0Safe_safe_UNA1_209707.4408	5085
0Safe_safe_UNA1_209708.4409	3816
0Safe_safe_UNA1_209714.4415	2608
0Safe_safe_UNA1_209718.4419	2623
0Safe_safe_UNA1_209726.4427	1667
0Safe_safe_UNA1_209732.4433	2117
0Safe_safe_UNA1_209735.4436	4602
0Safe_safe_UNA1_209738.4439	2400
0Safe_safe_UNA1_209753.4454	3136
0Safe_safe_UNA1_209776.4477	2784
0Safe_safe_UNA1_209779.4480	3662
0Safe_safe_UNA1_209781.4482	2262
0Safe_safe_UNA2_209806.3007	4411
0Safe_safe_UNA2_209807.3008	3341
0Safe_safe_UNA2_209811.3012	63
0Safe_safe_UNA2_209817.3018	3219
0Safe_safe_UNA2_209819.3020	2806
0Safe_safe_UNA2_209840.3041	4099
0Safe_safe_UNA2_209851.3052	1460
0Safe_safe_UNA2_209866.3067	1846
0Safe_safe_UNA2_209870.3071	2764
0Safe_safe_UNA2_209872.3073	3556
0Safe_safe_UNA2_209888.3089	2896
0Safe_safe_UNA2_209890.3091	1394
0Safe_safe_UNA2_209891.3092	2758
0Safe_safe_UNA2_209896.3097	3564
0Safe_safe_UNA2_209912.3113	3994
0Safe_safe_UNA2_209918.3119	2380
0Safe_safe_UNA2_209924.3125	4296
0Safe_safe_UNA2_209925.3126	3450
0Safe_safe_UNA2_209936.3137	4892
0Safe_safe_UNA2_209941.3142	3553
0Safe_safe_UNA2_209947.3148	3132
0Safe_safe_UNA2_209950.3151	3758
0Safe_safe_UNA2_209958.3159	3072
0Safe_safe_UNA2_209977.3178	4591
0Safe_safe_UNA2_209981.3182	4441
0Safe_safe_UNA2_210003.3204	4419
0Safe_safe_UNA2_210034.3235	3067
0Safe_safe_UNA2_210050.3251	2261
0Safe_safe_UNA2_210057.3258	1965
0Safe_safe_UNA2_210059.3260	2199
0Safe_safe_UNA2_210077.3278	1423
0Safe_safe_UNA2_210081.3282	3340
0Safe_safe_UNA2_210083.3284	4370
0Safe_safe_UNA2_210085.3286	3754
0Safe_safe_UNA2_210091.3292	3357
0Safe_safe_UNA2_210094.3295	2503
0Safe_safe_UNA2_210096.3297	1523
0Safe_safe_UNA2_210101.3302	2182
0Safe_safe_UNA2_210120.3321	1466
0Safe_safe_UNA2_210135.3336	2769
0Safe_safe_UNA2_210139.3340	2351
0Safe_safe_UNA2_210153.3354	3793
0Safe_safe_UNA2_210155.3356	4703
0Safe_safe_UNA2_210156.3357	2446
0Safe_safe_UNA2_210166.3367	2005
0Safe_safe_UNA2_210168.3369	3320
0Safe_safe_UNA2_210183.3384	2071
0Safe_safe_UNA2_210185.3386	3556
0Safe_safe_UNA2_210192.3393	2567
0Safe_safe_UNA2_210193.3394	2447
0Safe_safe_UNA2_210200.3401	3032
0Safe_safe_UNA2_210202.3403	3254
0Safe_safe_UNA2_210204.3405	3013
0Safe_safe_UNA2_210206.3407	3559
0Safe_safe_UNA2_210221.3422	2151
0Safe_safe_UNA2_210223.3424	3762
0Safe_safe_UNA2_210226.3427	1763
0Safe_safe_UNA2_210227.3428	3183
0Safe_safe_UNA2_210236.3437	3173
0Safe_safe_UNA2_210241.3442	2474
0Safe_safe_UNA2_210247.3448	2908
0Safe_safe_UNA2_210258.3459	3272
0Safe_safe_UNA2_210265.3466	2392
0Safe_safe_UNA2_210283.3484	2265
0Safe_safe_UNA2_210288.3489	3681
0Safe_safe_UNA2_210292.3493	3899
0Safe_safe_UNA2_210294.3495	2534
0Safe_safe_UNA2_210298.3499	2469
0Safe_safe_UNA2_210299.3500	3518
0Safe_safe_UNA2_210312.3513	1012
0Safe_safe_UNA2_210313.3514	2829
0Safe_safe_UNA2_210321.3522	2371
0Safe_safe_UNA2_210327.3528	2270
0Safe_safe_UNA2_210337.3538	3607
0Safe_safe_UNA2_210341.3542	2528
0Safe_safe_UNA2_210351.3552	4782
0Safe_safe_UNA2_210357.3558	2356
0Safe_safe_UNA2_210358.3559	4156
0Safe_safe_UNA2_210363.3564	2792
0Safe_safe_UNA2_210373.3574	4302
0Safe_safe_UNA2_210378.3579	2530
0Safe_safe_UNA2_210388.3589	1920
0Safe_safe_UNA2_210402.3603	4672
0Safe_safe_UNA2_210419.3620	3880
0Safe_safe_UNA2_210420.3621	3247
0Safe_safe_UNA2_210434.3635	2822
0Safe_safe_UNA2_210459.3660	2382
0Safe_safe_UNA2_210478.3679	2953
0Safe_safe_UNA2_210480.3681	1285
0Safe_safe_UNA2_210483.3684	4375
0Safe_safe_UNA2_210487.3688	3275
0Safe_safe_UNA2_210489.3690	3831
0Safe_safe_UNA2_210490.3691	3518
0Safe_safe_UNA2_210500.3701	4622
0Safe_safe_UNA2_210512.3713	4799
0Safe_safe_UNA2_210521.3722	3222
0Safe_safe_UNA2_210527.3728	2638
0Safe_safe_UNA2_210538.3739	3621
0Safe_safe_UNA2_210547.3748	2413
0Safe_safe_UNA3_210560.6011	1609
0Safe_safe_UNA3_210582.6033	2782
0Safe_safe_UNA3_210586.6037	1930
0Safe_safe_UNA3_210593.6044	2942
0Safe_safe_UNA3_210599.6050	4459
0Safe_safe_UNA3_210601.6052	2994
0Safe_safe_UNA3_210606.6057	3061
0Safe_safe_UNA3_210607.6058	2702
0Safe_safe_UNA3_210612.6063	5169
0Safe_safe_UNA3_210622.6073	2527
0Safe_safe_UNA3_210628.6079	2163
0Safe_safe_UNA3_210633.6084	3583
0Safe_safe_UNA3_210634.6085	2914
0Safe_safe_UNA3_210643.6094	1089
0Safe_safe_UNA3_210644.6095	669
0Safe_safe_UNA3_210648.6099	2156
0Safe_safe_UNA3_210676.6127	3557
0Safe_safe_UNA3_210679.6130	3095
0Safe_safe_UNA3_210709.6160	4627
0Safe_safe_UNA3_210711.6162	3251
0Safe_safe_UNA3_210714.6165	3280
0Safe_safe_UNA3_210717.6168	2405
0Safe_safe_UNA3_210719.6170	3505
0Safe_safe_UNA3_210721.6172	4321
0Safe_safe_UNA3_210723.6174	3474
0Safe_safe_UNA3_210725.6176	2050
0Safe_safe_UNA3_210728.6179	2945
0Safe_safe_UNA3_210733.6184	2382
0Safe_safe_UNA3_210737.6188	3065
0Safe_safe_UNA3_210738.6189	2916
0Safe_safe_UNA3_210739.6190	3574
0Safe_safe_UNA3_210753.6204	4478
0Safe_safe_UNA3_210756.6207	2858
0Safe_safe_UNA3_210758.6209	2372
0Safe_safe_UNA3_210759.6210	4434
0Safe_safe_UNA3_210760.6211	3635
0Safe_safe_UNA3_210768.6219	2381
0Safe_safe_UNA3_210772.6223	1796
0Safe_safe_UNA3_210780.6231	2674
0Safe_safe_UNA3_210781.6232	2192
0Safe_safe_UNA3_210785.6236	2912
0Safe_safe_UNA3_210792.6243	2263
0Safe_safe_UNA3_210794.6245	2305
0Safe_safe_UNA3_210797.6248	2680
0Safe_safe_UNA3_210799.6250	2921
0Safe_safe_UNA3_210800.6251	2409
0Safe_safe_UNA3_210804.6255	2495
0Safe_safe_UNA3_210807.6258	2149
0Safe_safe_UNA3_210808.6259	1650
0Safe_safe_UNA3_210813.6264	3083
0Safe_safe_UNA3_210814.6265	3410
0Safe_safe_UNA3_210819.6270	2711
0Safe_safe_UNA3_210825.6276	2197
0Safe_safe_UNA3_210840.6291	1070
0Safe_safe_UNA3_210845.6296	4341
0Safe_safe_UNA3_210850.6301	2599
0Safe_safe_UNA3_210861.6312	3570
0Safe_safe_UNA3_210867.6318	4304
0Safe_safe_UNA3_210880.6331	1936
0Safe_safe_UNA3_210882.6333	2379
0Safe_safe_UNA3_210889.6340	3643
0Safe_safe_UNA3_210913.6364	2811
0Safe_safe_UNA3_210915.6366	4770
0Safe_safe_UNA3_210936.6387	2818
0Safe_safe_UNA3_210939.6390	3422
0Safe_safe_UNA3_210944.6395	2535
0Safe_safe_UNA3_210947.6398	2976
0Safe_safe_UNA3_210949.6400	653
0Safe_safe_UNA3_210951.6402	3763
0Safe_safe_UNA3_210963.6414	2880
0Safe_safe_UNA3_210969.6420	2685
0Safe_safe_UNA3_210978.6429	2748
0Safe_safe_UNA3_210989.6440	2187
0Safe_safe_UNA3_210995.6446	1794
0Safe_safe_UNA3_211003.6454	1420
0Safe_safe_UNA3_211009.6460	1671
0Safe_safe_UNA3_211011.6462	2971
0Safe_safe_UNA3_211017.6468	6402
0Safe_safe_UNA3_211022.6473	6636
0Safe_safe_UNA3_211027.6478	2225
0Safe_safe_UNA3_211034.6485	1816
0Safe_safe_UNA3_211037.6488	5752
0Safe_safe_UNA3_211051.6502	3943
0Safe_safe_UNA3_211057.6508	4592
0Safe_safe_UNA3_211063.6514	4112
0Safe_safe_UNA3_211077.6528	3641
0Safe_safe_UNA3_211078.6529	1327
0Safe_safe_UNA3_211082.6533	4703
0Safe_safe_UNA3_211086.6537	3625
0Safe_safe_UNA3_211091.6542	4079
0Safe_safe_UNA3_211093.6544	3677
0Safe_safe_UNA3_211100.6551	3151
0Safe_safe_UNA3_211107.6558	2400
0Safe_safe_UNA3_211123.6574	3112
0Safe_safe_UNA3_211129.6580	3334
0Safe_safe_UNA3_211142.6593	2908
0Safe_safe_UNA3_211144.6595	3392
0Safe_safe_UNA3_211149.6600	4040
0Safe_safe_UNA3_211150.6601	2358
0Safe_safe_UNA3_211165.6616	2306
0Safe_safe_UNA3_211166.6617	3732
0Safe_safe_UNA3_211172.6623	1522
0Safe_safe_UNA3_211175.6626	4345
0Safe_safe_UNA3_211183.6634	3064
0Safe_safe_UNA3_211184.6635	3065
0Safe_safe_UNA3_211186.6637	1996
0Safe_safe_UNA3_211187.6638	1621
0Safe_safe_UNA3_211188.6639	3490
0Safe_safe_UNA3_211197.6648	1238
0Safe_safe_UNA3_211204.6655	2753
0Safe_safe_UNA3_211217.6668	2744
0Safe_safe_UNA3_211223.6674	2296
0Safe_safe_UNA3_211230.6681	2973
0Safe_safe_UNA3_211231.6682	2554
0Safe_safe_UNA3_211232.6683	6260
0Safe_safe_UNA3_211233.6684	4061
0Safe_safe_UNA3_211242.6693	2077
0Safe_safe_UNA3_211266.6717	3413
0Safe_safe_UNA3_211270.6721	3870
0Safe_safe_UNA3_211271.6722	2050
0Safe_safe_UNA3_211272.6723	2672
0Safe_safe_UNA3_211278.6729	3703
0Safe_safe_UNA3_211290.6741	3012
ABCB11_P1P2_crispri_491	3848
[truncated: 2,941 more rows]

## Sheet: Ricin plus Retro-2 rep 1
0NONE_na_crispri_205283	2347
0NONE_na_crispri_205288	742
0NONE_na_crispri_205289	1360
0NONE_na_crispri_205291	1587
0NONE_na_crispri_205292	1279
0NONE_na_crispri_205296	1182
0NONE_na_crispri_205298	1458
0NONE_na_crispri_205299	828
0NONE_na_crispri_205300	1478
0NONE_na_crispri_205301	2757
0NONE_na_crispri_205304	1111
0NONE_na_crispri_205305	1962
0NONE_na_crispri_205308	577
0NONE_na_crispri_205313	1908
0NONE_na_crispri_205320	1315
0NONE_na_crispri_205327	1804
0NONE_na_crispri_205330	1434
0NONE_na_crispri_205334	1598
0NONE_na_crispri_205335	2100
0NONE_na_crispri_205336	2303
0NONE_na_crispri_205338	1636
0NONE_na_crispri_205340	959
0NONE_na_crispri_205347	2408
0NONE_na_crispri_205348	1537
0NONE_na_crispri_205353	1070
0NONE_na_crispri_205363	2204
0NONE_na_crispri_205364	1713
0NONE_na_crispri_205366	1629
0NONE_na_crispri_205367	1599
0NONE_na_crispri_205369	1917
0NONE_na_crispri_205372	1984
0NONE_na_crispri_205375	1775
0NONE_na_crispri_205376	764
0NONE_na_crispri_205393	2888
0NONE_na_crispri_205395	1823
0NONE_na_crispri_205399	1861
0NONE_na_crispri_205401	1211
0NONE_na_crispri_205403	1910
0NONE_na_crispri_205408	1455
0NONE_na_crispri_205415	1697
0NONE_na_crispri_205418	1962
0NONE_na_crispri_205420	1167
0NONE_na_crispri_205425	2422
0NONE_na_crispri_205427	1493
0NONE_na_crispri_205436	1660
0NONE_na_crispri_205439	1237
0NONE_na_crispri_205442	1063
0NONE_na_crispri_205446	999
0NONE_na_crispri_205449	1969
0NONE_na_crispri_205450	733
0NONE_na_crispri_205451	2262
0NONE_na_crispri_205452	1541
0NONE_na_crispri_205458	1599
0NONE_na_crispri_205459	1705
0NONE_na_crispri_205460	2286
0NONE_na_crispri_205463	2333
0NONE_na_crispri_205469	2498
0NONE_na_crispri_205474	262
0NONE_na_crispri_205477	2363
0NONE_na_crispri_205478	1267
0NONE_na_crispri_205479	1749
0NONE_na_crispri_205481	2795
0NONE_na_crispri_205484	1806
0NONE_na_crispri_205498	2159
0NONE_na_crispri_205499	1264
0NONE_na_crispri_205512	1693
0NONE_na_crispri_205513	2181
0NONE_na_crispri_205514	924
0NONE_na_crispri_205524	1956
0NONE_na_crispri_205526	1861
0NONE_na_crispri_205530	1088
0NONE_na_crispri_205537	1250
0NONE_na_crispri_205540	629
0NONE_na_crispri_205562	878
0NONE_na_crispri_205563	1930
0NONE_na_crispri_205565	2030
0NONE_na_crispri_205566	1427
0NONE_na_crispri_205569	1447
0NONE_na_crispri_205576	2554
0NONE_na_crispri_205588	1001
0NONE_na_crispri_205596	1804
0NONE_na_crispri_205605	3029
0NONE_na_crispri_205606	2534
0NONE_na_crispri_205615	3140
0NONE_na_crispri_205619	2196
0NONE_na_crispri_205624	417
0NONE_na_crispri_205635	1266
0NONE_na_crispri_205639	1538
0NONE_na_crispri_205640	1373
0NONE_na_crispri_205647	3208
0NONE_na_crispri_205648	1201
0NONE_na_crispri_205652	1133
0NONE_na_crispri_205654	1514
0NONE_na_crispri_205667	1066
0NONE_na_crispri_205669	2596
0NONE_na_crispri_205670	1959
0NONE_na_crispri_205672	1238
0NONE_na_crispri_205689	1995
0NONE_na_crispri_205690	1519
0NONE_na_crispri_205691	1188
0NONE_na_crispri_205692	1197
0NONE_na_crispri_205695	2555
0NONE_na_crispri_205698	2937
0NONE_na_crispri_205702	1991
0NONE_na_crispri_205704	1531
0NONE_na_crispri_205706	3241
0NONE_na_crispri_205708	2469
0NONE_na_crispri_205709	2097
0NONE_na_crispri_205717	2162
0NONE_na_crispri_205718	1594
0NONE_na_crispri_205723	1479
0NONE_na_crispri_205734	740
0NONE_na_crispri_205736	1337
0NONE_na_crispri_205739	1204
0NONE_na_crispri_205743	1580
0NONE_na_crispri_205746	2454
0NONE_na_crispri_205749	3396
0NONE_na_crispri_205750	1726
0NONE_na_crispri_205751	1036
0NONE_na_crispri_205759	860
0NONE_na_crispri_205764	1044
0NONE_na_crispri_205765	1034
0NONE_na_crispri_205769	1651
0NONE_na_crispri_205778	2135
0NONE_na_crispri_205783	1392
0NONE_na_crispri_205784	1650
0NONE_na_crispri_205786	1122
0NONE_na_crispri_205787	1936
0NONE_na_crispri_205789	1619
0NONE_na_crispri_205790	3252
0NONE_na_crispri_205806	1571
0NONE_na_crispri_205807	2462
0NONE_na_crispri_205812	3660
0NONE_na_crispri_205813	1405
0NONE_na_crispri_205814	1003
0NONE_na_crispri_205823	2494
0NONE_na_crispri_205825	1621
0NONE_na_crispri_205827	1441
0NONE_na_crispri_205828	1894
0NONE_na_crispri_205829	2346
0NONE_na_crispri_205830	1096
0NONE_na_crispri_205833	2021
0NONE_na_crispri_205840	955
0NONE_na_crispri_205842	2183
0NONE_na_crispri_205845	1948
0NONE_na_crispri_205855	2264
0NONE_na_crispri_205856	1264
0NONE_na_crispri_205865	1229
0NONE_na_crispri_205866	1617
0NONE_na_crispri_205868	1794
0NONE_na_crispri_205874	1247
0NONE_na_crispri_205875	2871
0NONE_na_crispri_205881	1569
0NONE_na_crispri_205894	2128
0NONE_na_crispri_205897	2463
0NONE_na_crispri_205901	1979
0NONE_na_crispri_205903	2781
0NONE_na_crispri_205906	1485
0NONE_na_crispri_205907	2272
0NONE_na_crispri_205908	2051
0NONE_na_crispri_205909	826
0NONE_na_crispri_205911	764
0NONE_na_crispri_205917	2193
0NONE_na_crispri_205927	812
0NONE_na_crispri_205933	1697
0NONE_na_crispri_205934	2098
0NONE_na_crispri_205937	1860
0NONE_na_crispri_205947	1717
0NONE_na_crispri_205949	1093
0NONE_na_crispri_205951	1477
0NONE_na_crispri_205955	1810
0NONE_na_crispri_205956	2888
0NONE_na_crispri_205959	1189
0NONE_na_crispri_205961	1176
0NONE_na_crispri_205966	1959
0NONE_na_crispri_205973	167
0NONE_na_crispri_205975	1087
0NONE_na_crispri_205981	2641
0NONE_na_crispri_205984	2399
0NONE_na_crispri_205985	2038
0NONE_na_crispri_205989	1790
0NONE_na_crispri_205990	1563
0NONE_na_crispri_205992	1598
0NONE_na_crispri_205993	1091
0NONE_na_crispri_205994	2860
0NONE_na_crispri_206004	1718
0NONE_na_crispri_206010	1225
0NONE_na_crispri_206014	2108
0NONE_na_crispri_206022	1641
0NONE_na_crispri_206024	1154
0NONE_na_crispri_206027	2056
0NONE_na_crispri_206030	1248
0NONE_na_crispri_206032	1456
0NONE_na_crispri_206037	2485
0NONE_na_crispri_206039	2725
0NONE_na_crispri_206040	2067
0NONE_na_crispri_206047	1051
0NONE_na_crispri_206051	2194
0NONE_na_crispri_206054	948
0NONE_na_crispri_206056	1412
0NONE_na_crispri_206062	1319
0NONE_na_crispri_206066	1759
0NONE_na_crispri_206077	1721
0NONE_na_crispri_206079	73
0NONE_na_crispri_206086	964
0NONE_na_crispri_206092	852
0NONE_na_crispri_206100	1583
0NONE_na_crispri_206101	2574
0NONE_na_crispri_206104	1214
0NONE_na_crispri_206106	1162
0NONE_na_crispri_206107	1569
0NONE_na_crispri_206110	2732
0NONE_na_crispri_206113	2236
0NONE_na_crispri_206114	1058
0NONE_na_crispri_206117	1798
0NONE_na_crispri_206119	1520
0NONE_na_crispri_206123	28
0NONE_na_crispri_206124	1703
0NONE_na_crispri_206128	935
0NONE_na_crispri_206137	1121
0NONE_na_crispri_206139	2939
0NONE_na_crispri_206148	1946
0NONE_na_crispri_206149	871
0NONE_na_crispri_206158	2216
0NONE_na_crispri_206166	1950
0NONE_na_crispri_206167	2318
0NONE_na_crispri_206170	1202
0NONE_na_crispri_206173	2229
0NONE_na_crispri_206175	2066
0NONE_na_crispri_206177	1368
0NONE_na_crispri_206180	1715
0NONE_na_crispri_206188	1383
0NONE_na_crispri_206189	1121
0NONE_na_crispri_206190	1729
0NONE_na_crispri_206191	2552
0NONE_na_crispri_206193	3543
0NONE_na_crispri_206199	1092
0NONE_na_crispri_206212	1273
0NONE_na_crispri_206218	1079
0NONE_na_crispri_206219	716
0NONE_na_crispri_206220	3122
0NONE_na_crispri_206231	1515
0NONE_na_crispri_206233	2152
0NONE_na_crispri_206244	1108
0NONE_na_crispri_206245	2282
0NONE_na_crispri_206246	1445
0NONE_na_crispri_206251	1364
0NONE_na_crispri_206252	2530
0NONE_na_crispri_206253	1757
0NONE_na_crispri_206259	1705
0NONE_na_crispri_206262	2142
0NONE_na_crispri_206263	2370
0NONE_na_crispri_206264	2256
0NONE_na_crispri_206274	1481
0NONE_na_crispri_206276	1076
0NONE_na_crispri_206281	1872
0NONE_na_crispri_206284	2649
0NONE_na_crispri_206285	1372
0NONE_na_crispri_206291	1260
0NONE_na_crispri_206292	2293
0NONE_na_crispri_206293	1803
0NONE_na_crispri_206294	1531
0NONE_na_crispri_206296	2441
0NONE_na_crispri_206298	2037
0NONE_na_crispri_206307	1743
0NONE_na_crispri_206310	2059
0NONE_na_crispri_206312	1159
0NONE_na_crispri_206317	1338
0NONE_na_crispri_206319	2842
0NONE_na_crispri_206321	2203
0NONE_na_crispri_206324	1853
0NONE_na_crispri_206331	1877
0NONE_na_crispri_206332	1474
0NONE_na_crispri_206335	1593
0NONE_na_crispri_206336	819
0NONE_na_crispri_206338	2561
0NONE_na_crispri_206345	1513
0NONE_na_crispri_206346	1689
0NONE_na_crispri_206347	1417
0NONE_na_crispri_206351	1712
0NONE_na_crispri_206353	1483
0NONE_na_crispri_206355	2810
0NONE_na_crispri_206358	2172
0NONE_na_crispri_206361	2597
0NONE_na_crispri_206364	2261
0NONE_na_crispri_206369	892
0NONE_na_crispri_206370	2505
0NONE_na_crispri_206371	1762
0NONE_na_crispri_206373	3081
0NONE_na_crispri_206374	1759
0NONE_na_crispri_206378	976
0NONE_na_crispri_206379	1898
0NONE_na_crispri_206383	2675
0NONE_na_crispri_206388	2136
0NONE_na_crispri_206390	2454
0NONE_na_crispri_206392	1736
0NONE_na_crispri_206397	64
0NONE_na_crispri_206398	2108
0NONE_na_crispri_206412	1287
0NONE_na_crispri_206417	1933
0NONE_na_crispri_206425	1711
0NONE_na_crispri_206436	2436
0NONE_na_crispri_206438	1847
0NONE_na_crispri_206439	1789
0NONE_na_crispri_206443	1516
0NONE_na_crispri_206444	1284
0NONE_na_crispri_206449	2153
0NONE_na_crispri_206453	1884
0NONE_na_crispri_206454	2601
0NONE_na_crispri_206457	1467
0NONE_na_crispri_206459	1497
0NONE_na_crispri_206460	2658
0NONE_na_crispri_206462	1567
0NONE_na_crispri_206463	1112
0NONE_na_crispri_206465	1702
0NONE_na_crispri_206466	2744
0NONE_na_crispri_206475	1804
0NONE_na_crispri_206480	1621
0NONE_na_crispri_206481	2213
0NONE_na_crispri_206484	840
0NONE_na_crispri_206485	2455
0NONE_na_crispri_206486	2540
0NONE_na_crispri_206493	2007
0NONE_na_crispri_206496	1673
0NONE_na_crispri_206500	1370
0NONE_na_crispri_206505	626
0NONE_na_crispri_206506	571
0NONE_na_crispri_206507	2307
0NONE_na_crispri_206514	920
0NONE_na_crispri_206517	2490
0NONE_na_crispri_206520	722
0NONE_na_crispri_206524	1536
0NONE_na_crispri_206530	1229
0NONE_na_crispri_206534	1763
0NONE_na_crispri_206537	2072
0NONE_na_crispri_206542	1421
0NONE_na_crispri_206549	1740
0NONE_na_crispri_206555	1260
0NONE_na_crispri_206556	2352
0NONE_na_crispri_206558	2155
0NONE_na_crispri_206560	1127
0NONE_na_crispri_206562	3198
0NONE_na_crispri_206567	1493
0NONE_na_crispri_206573	1528
0NONE_na_crispri_206575	1236
0NONE_na_crispri_206579	2460
0NONE_na_crispri_206583	1150
0NONE_na_crispri_206584	1995
0NONE_na_crispri_206585	2713
0NONE_na_crispri_206592	1705
0NONE_na_crispri_206597	2189
0NONE_na_crispri_206598	2222
0NONE_na_crispri_206607	2930
0NONE_na_crispri_206611	117
0NONE_na_crispri_206613	1437
0NONE_na_crispri_206622	1652
0NONE_na_crispri_206625	1612
0NONE_na_crispri_206633	1047
0NONE_na_crispri_206634	2438
0NONE_na_crispri_206639	2835
0NONE_na_crispri_206642	986
0NONE_na_crispri_206647	1346
0NONE_na_crispri_206652	1545
0NONE_na_crispri_206657	1499
0NONE_na_crispri_206659	937
0NONE_na_crispri_206667	1691
0NONE_na_crispri_206670	2292
0NONE_na_crispri_206675	1652
0NONE_na_crispri_206681	2171
0NONE_na_crispri_206683	1626
0NONE_na_crispri_206694	718
0NONE_na_crispri_206695	2412
0NONE_na_crispri_206697	1157
0NONE_na_crispri_206699	807
0NONE_na_crispri_206701	1618
0NONE_na_crispri_206702	1141
0NONE_na_crispri_206704	1546
0NONE_na_crispri_206709	1301
0NONE_na_crispri_206710	1112
0NONE_na_crispri_206723	1473
0NONE_na_crispri_206728	780
0NONE_na_crispri_206729	2399
0NONE_na_crispri_206730	1691
0NONE_na_crispri_206741	2284
0NONE_na_crispri_206754	1554
0NONE_na_crispri_206756	513
0NONE_na_crispri_206757	1024
0NONE_na_crispri_206760	1870
0NONE_na_crispri_206764	1305
0NONE_na_crispri_206765	2395
0NONE_na_crispri_206766	2055
0NONE_na_crispri_206767	1868
0NONE_na_crispri_206773	1557
0NONE_na_crispri_206774	1784
0NONE_na_crispri_206777	1956
0NONE_na_crispri_206778	1616
0NONE_na_crispri_206781	1562
0NONE_na_crispri_206782	141
0NONE_na_crispri_206784	1007
0NONE_na_crispri_206787	610
0NONE_na_crispri_206806	1805
0NONE_na_crispri_206809	2128
0NONE_na_crispri_206812	1511
0NONE_na_crispri_206815	1482
0NONE_na_crispri_206821	1690
0NONE_na_crispri_206822	2127
0NONE_na_crispri_206823	1608
0NONE_na_crispri_206824	2944
0NONE_na_crispri_206825	1189
0NONE_na_crispri_206826	763
0NONE_na_crispri_206829	2402
0NONE_na_crispri_206831	1579
0NONE_na_crispri_206834	1618
0NONE_na_crispri_206840	1916
0NONE_na_crispri_206844	2283
0NONE_na_crispri_206848	1897
0NONE_na_crispri_206852	1242
0NONE_na_crispri_206854	2763
0NONE_na_crispri_206856	1632
0NONE_na_crispri_206860	1501
0NONE_na_crispri_206861	2583
0NONE_na_crispri_206862	1675
0NONE_na_crispri_206865	1930
0NONE_na_crispri_206866	1582
0NONE_na_crispri_206869	936
0NONE_na_crispri_206872	3108
0NONE_na_crispri_206878	929
0NONE_na_crispri_206879	1123
0NONE_na_crispri_206882	3109
0NONE_na_crispri_206885	1509
0NONE_na_crispri_206897	1679
0NONE_na_crispri_206903	3133
0NONE_na_crispri_206904	1780
0NONE_na_crispri_206906	1623
0NONE_na_crispri_206909	1384
0NONE_na_crispri_206910	1922
0NONE_na_crispri_206914	1875
0NONE_na_crispri_206917	729
0NONE_na_crispri_206919	1280
0NONE_na_crispri_206920	1849
0NONE_na_crispri_206923	1132
0NONE_na_crispri_206926	1063
0NONE_na_crispri_206929	1227
0NONE_na_crispri_206933	1583
0NONE_na_crispri_206935	987
0NONE_na_crispri_206936	1704
0NONE_na_crispri_206938	1436
0NONE_na_crispri_206945	1855
0NONE_na_crispri_206946	2881
0NONE_na_crispri_206947	1623
0NONE_na_crispri_206949	2901
0NONE_na_crispri_206954	3125
0NONE_na_crispri_206956	1119
0NONE_na_crispri_206958	1669
0NONE_na_crispri_206962	1983
0NONE_na_crispri_206963	1519
0NONE_na_crispri_206965	1689
0NONE_na_crispri_206972	1620
0NONE_na_crispri_206976	1694
0NONE_na_crispri_206985	2025
0NONE_na_crispri_206991	1140
0NONE_na_crispri_206992	3880
0NONE_na_crispri_206993	1341
0NONE_na_crispri_207005	1377
0NONE_na_crispri_207007	1219
0NONE_na_crispri_207008	1684
0NONE_na_crispri_207016	3512
0NONE_na_crispri_207019	1746
0NONE_na_crispri_207021	2176
0NONE_na_crispri_207022	1556
0NONE_na_crispri_207029	721
0NONE_na_crispri_207043	1925
0NONE_na_crispri_207044	3377
0NONE_na_crispri_207053	1923
0NONE_na_crispri_207059	682
0NONE_na_crispri_207063	1947
0NONE_na_crispri_207069	2259
0NONE_na_crispri_207070	1268
0NONE_na_crispri_207074	1913
0NONE_na_crispri_207080	1100
0NONE_na_crispri_207084	1442
0NONE_na_crispri_207090	1667
0NONE_na_crispri_207103	1851
0NONE_na_crispri_207108	1847
0NONE_na_crispri_207110	1648
0NONE_na_crispri_207118	1582
0NONE_na_crispri_207119	2709
0NONE_na_crispri_207126	1729
0NONE_na_crispri_207128	1299
0NONE_na_crispri_207131	1145
0NONE_na_crispri_207132	1476
0NONE_na_crispri_207140	2139
0NONE_na_crispri_207141	1373
0NONE_na_crispri_207144	1485
0NONE_na_crispri_207147	1250
0NONE_na_crispri_207149	1878
0NONE_na_crispri_207154	903
0NONE_na_crispri_207158	1981
0NONE_na_crispri_207160	1076
0NONE_na_crispri_207162	2099
0NONE_na_crispri_207163	1911
0NONE_na_crispri_207173	1706
0NONE_na_crispri_207183	2148
0NONE_na_crispri_207185	2314
0NONE_na_crispri_207186	1406
0NONE_na_crispri_207187	1395
0NONE_na_crispri_207192	2743
0NONE_na_crispri_207196	1493
0NONE_na_crispri_207200	1621
0NONE_na_crispri_207203	1574
0NONE_na_crispri_207204	1015
0NONE_na_crispri_207206	2445
0NONE_na_crispri_207208	1795
0NONE_na_crispri_207211	3131
0NONE_na_crispri_207212	1105
0NONE_na_crispri_207213	1630
0NONE_na_crispri_207214	1444
0NONE_na_crispri_207215	950
0NONE_na_crispri_207216	1298
0NONE_na_crispri_207218	1219
0NONE_na_crispri_207219	2838
0NONE_na_crispri_207222	1087
0NONE_na_crispri_207224	1398
0NONE_na_crispri_207225	1475
0NONE_na_crispri_207226	1002
0NONE_na_crispri_207228	687
0NONE_na_crispri_207230	1664
0NONE_na_crispri_207239	1816
0NONE_na_crispri_207245	2487
0NONE_na_crispri_207257	1445
0NONE_na_crispri_207271	1404
0NONE_na_crispri_207272	1372
0NONE_na_crispri_207273	2173
0NONE_na_crispri_207274	1040
0NONE_na_crispri_207282	1591
0NONE_na_crispri_207289	1299
0NONE_na_crispri_207297	2690
0NONE_na_crispri_207300	2034
0NONE_na_crispri_207302	1065
0NONE_na_crispri_207305	1758
0NONE_na_crispri_207318	2956
0NONE_na_crispri_207319	895
0NONE_na_crispri_207330	824
0NONE_na_crispri_207334	2784
0NONE_na_crispri_207338	1148
0NONE_na_crispri_207339	1170
0NONE_na_crispri_207348	1328
0NONE_na_crispri_207351	1771
0NONE_na_crispri_207354	1648
0NONE_na_crispri_207355	2496
0NONE_na_crispri_207356	995
0NONE_na_crispri_207363	1039
0NONE_na_crispri_207366	1508
0NONE_na_crispri_207370	2067
0NONE_na_crispri_207371	1048
0NONE_na_crispri_207372	2019
0NONE_na_crispri_207373	1585
0NONE_na_crispri_207375	2243
0NONE_na_crispri_207389	2058
0NONE_na_crispri_207390	2174
0NONE_na_crispri_207394	2116
0NONE_na_crispri_207395	2833
0NONE_na_crispri_207400	1508
0NONE_na_crispri_207406	2318
0NONE_na_crispri_207408	1348
0NONE_na_crispri_207413	2406
0NONE_na_crispri_207427	1312
0NONE_na_crispri_207428	1619
0NONE_na_crispri_207431	1357
0NONE_na_crispri_207432	1221
0NONE_na_crispri_207434	1660
0NONE_na_crispri_207435	2498
0NONE_na_crispri_207437	1448
0NONE_na_crispri_207444	1470
0NONE_na_crispri_207450	3371
0NONE_na_crispri_207452	1076
0NONE_na_crispri_207457	1800
0NONE_na_crispri_207459	2603
0NONE_na_crispri_207461	2537
0NONE_na_crispri_207462	1449
0NONE_na_crispri_207468	1410
0NONE_na_crispri_207471	1369
0NONE_na_crispri_207475	1645
0NONE_na_crispri_207479	2231
0NONE_na_crispri_207482	803
0NONE_na_crispri_207483	1676
0NONE_na_crispri_207487	1589
0NONE_na_crispri_207489	2377
0NONE_na_crispri_207493	1749
0NONE_na_crispri_207494	1439
0NONE_na_crispri_207508	1041
0NONE_na_crispri_207510	1957
0NONE_na_crispri_207511	2605
0NONE_na_crispri_207512	1594
0NONE_na_crispri_207514	1594
0NONE_na_crispri_207516	470
0NONE_na_crispri_207522	545
0NONE_na_crispri_207534	1145
0NONE_na_crispri_207542	2235
0NONE_na_crispri_207553	987
0NONE_na_crispri_207555	2147
0NONE_na_crispri_207560	1912
0NONE_na_crispri_207566	2230
0NONE_na_crispri_207570	1489
0NONE_na_crispri_207571	2454
0NONE_na_crispri_207576	2175
0NONE_na_crispri_207582	2070
0NONE_na_crispri_207589	1032
0NONE_na_crispri_207590	934
0NONE_na_crispri_207597	1734
0NONE_na_crispri_207599	1296
0NONE_na_crispri_207602	2810
0NONE_na_crispri_207608	901
0NONE_na_crispri_207613	1531
0NONE_na_crispri_207614	2649
0NONE_na_crispri_207615	1600
0NONE_na_crispri_207617	1901
0NONE_na_crispri_207618	1041
0NONE_na_crispri_207627	2952
0NONE_na_crispri_207631	1973
0NONE_na_crispri_207632	2256
0NONE_na_crispri_207636	1189
0NONE_na_crispri_207637	1670
0NONE_na_crispri_207639	1276
0NONE_na_crispri_207640	1292
0NONE_na_crispri_207641	492
0NONE_na_crispri_207642	1633
0NONE_na_crispri_207643	2085
0NONE_na_crispri_207644	2037
0NONE_na_crispri_207646	1515
0NONE_na_crispri_207647	3549
0NONE_na_crispri_207649	862
0NONE_na_crispri_207655	2190
0NONE_na_crispri_207658	1553
0NONE_na_crispri_207660	1231
0NONE_na_crispri_207662	1738
0NONE_na_crispri_207669	2207
0NONE_na_crispri_207672	2217
0NONE_na_crispri_207673	1665
0NONE_na_crispri_207679	418
0NONE_na_crispri_207684	2187
0NONE_na_crispri_207694	1343
0NONE_na_crispri_207696	1445
0NONE_na_crispri_207704	2051
0NONE_na_crispri_207709	1583
0NONE_na_crispri_207710	1900
0NONE_na_crispri_207711	2496
0NONE_na_crispri_207721	156
0NONE_na_crispri_207728	1462
0NONE_na_crispri_207740	1868
0NONE_na_crispri_207743	2180
0NONE_na_crispri_207744	566
0NONE_na_crispri_207747	1734
0NONE_na_crispri_207753	487
0NONE_na_crispri_207757	1493
0NONE_na_crispri_207771	987
0NONE_na_crispri_207774	213
0NONE_na_crispri_207777	1569
0NONE_na_crispri_207778	1434
0NONE_na_crispri_207780	1670
0NONE_na_crispri_207786	2187
0NONE_na_crispri_207788	2835
0NONE_na_crispri_207789	1803
0NONE_na_crispri_207793	1280
0NONE_na_crispri_207800	2396
0NONE_na_crispri_207803	677
0NONE_na_crispri_207804	2292
0NONE_na_crispri_207805	1475
0NONE_na_crispri_207809	578
0NONE_na_crispri_207813	1414
0NONE_na_crispri_207814	1937
0NONE_na_crispri_207817	1927
0NONE_na_crispri_207819	1322
0NONE_na_crispri_207820	757
0NONE_na_crispri_207821	1514
0NONE_na_crispri_207824	959
0NONE_na_crispri_207830	1500
0NONE_na_crispri_207833	1858
0NONE_na_crispri_207834	2005
0NONE_na_crispri_207837	1483
0NONE_na_crispri_207838	1422
0NONE_na_crispri_207839	1290
0NONE_na_crispri_207843	1066
0NONE_na_crispri_207844	2581
0NONE_na_crispri_207845	1810
0NONE_na_crispri_207852	1615
0NONE_na_crispri_207853	192
0NONE_na_crispri_207857	1569
0NONE_na_crispri_207859	1069
0NONE_na_crispri_207870	2307
0NONE_na_crispri_207874	1804
0NONE_na_crispri_207875	998
0NONE_na_crispri_207876	1683
0NONE_na_crispri_207878	1518
0NONE_na_crispri_207882	2570
0NONE_na_crispri_207889	1620
0NONE_na_crispri_207891	1661
0NONE_na_crispri_207893	1950
0NONE_na_crispri_207897	2068
0NONE_na_crispri_207900	1242
0NONE_na_crispri_207902	916
0NONE_na_crispri_207909	2091
0NONE_na_crispri_207912	3534
0NONE_na_crispri_207913	1227
0NONE_na_crispri_207914	1447
0NONE_na_crispri_207915	2318
0NONE_na_crispri_207916	232
0NONE_na_crispri_207917	1510
0NONE_na_crispri_207918	2234
0NONE_na_crispri_207928	1790
0NONE_na_crispri_207931	2472
0NONE_na_crispri_207937	1642
0NONE_na_crispri_207942	1683
0NONE_na_crispri_207944	2081
0NONE_na_crispri_207945	2431
0NONE_na_crispri_207946	1157
0NONE_na_crispri_207948	1425
0NONE_na_crispri_207952	1214
0NONE_na_crispri_207956	1236
0NONE_na_crispri_207958	1722
0NONE_na_crispri_207960	1714
0NONE_na_crispri_207961	1852
0NONE_na_crispri_207971	1805
0NONE_na_crispri_207975	1346
0NONE_na_crispri_207977	2779
0NONE_na_crispri_207978	2156
0NONE_na_crispri_207982	855
0NONE_na_crispri_207985	2486
0NONE_na_crispri_207991	2280
0NONE_na_crispri_207995	1028
0NONE_na_crispri_208000	1619
0NONE_na_crispri_208003	3754
0NONE_na_crispri_208004	1249
0NONE_na_crispri_208011	1972
0NONE_na_crispri_208016	768
0NONE_na_crispri_208018	1634
0NONE_na_crispri_208019	2496
0NONE_na_crispri_208020	1162
0NONE_na_crispri_208027	2091
0NONE_na_crispri_208030	1356
0NONE_na_crispri_208040	2001
0NONE_na_crispri_208042	3470
0NONE_na_crispri_208044	1657
0NONE_na_crispri_208045	1019
0NONE_na_crispri_208046	2267
0NONE_na_crispri_208047	2073
0NONE_na_crispri_208050	1560
0NONE_na_crispri_208059	1645
0NONE_na_crispri_208060	1187
0NONE_na_crispri_208063	1327
0NONE_na_crispri_208068	535
0NONE_na_crispri_208069	1582
0NONE_na_crispri_208071	1246
0NONE_na_crispri_208072	2005
0NONE_na_crispri_208081	2431
0NONE_na_crispri_208082	1094
0NONE_na_crispri_208083	2412
0NONE_na_crispri_208085	2967
0NONE_na_crispri_208087	2034
0NONE_na_crispri_208091	2533
0NONE_na_crispri_208092	3503
0NONE_na_crispri_208093	265
0NONE_na_crispri_208103	2004
0NONE_na_crispri_208107	1320
0NONE_na_crispri_208110	2728
0NONE_na_crispri_208118	2142
0NONE_na_crispri_208120	1302
0NONE_na_crispri_208123	1395
0NONE_na_crispri_208127	1945
0NONE_na_crispri_208131	1221
0NONE_na_crispri_208135	1396
0NONE_na_crispri_208138	1652
0NONE_na_crispri_208139	2242
0NONE_na_crispri_208140	1729
0NONE_na_crispri_208142	1046
0NONE_na_crispri_208174	1382
0NONE_na_crispri_208175	2048
0NONE_na_crispri_208177	1378
0NONE_na_crispri_208180	905
0NONE_na_crispri_208181	1921
0NONE_na_crispri_208184	1342
0NONE_na_crispri_208186	1543
0NONE_na_crispri_208191	1457
0NONE_na_crispri_208198	1218
0NONE_na_crispri_208202	2000
0NONE_na_crispri_208206	655
0NONE_na_crispri_208212	1308
0NONE_na_crispri_208219	2081
0NONE_na_crispri_208224	1438
0NONE_na_crispri_208229	3309
0NONE_na_crispri_208236	765
0NONE_na_crispri_208237	1522
0NONE_na_crispri_208241	1852
0NONE_na_crispri_208255	1812
0NONE_na_crispri_208259	1727
0NONE_na_crispri_208261	3264
0NONE_na_crispri_208265	2153
0NONE_na_crispri_208267	1503
0NONE_na_crispri_208277	2868
0NONE_na_crispri_208278	2028
0NONE_na_crispri_208279	236
0NONE_na_crispri_208290	2851
0NONE_na_crispri_208294	1619
0NONE_na_crispri_208296	1919
0NONE_na_crispri_208297	2578
0NONE_na_crispri_208301	1380
0NONE_na_crispri_208308	1757
0NONE_na_crispri_208310	1395
0NONE_na_crispri_208313	2001
0NONE_na_crispri_208321	1866
0NONE_na_crispri_208330	1353
0NONE_na_crispri_208331	3249
0NONE_na_crispri_208336	1771
0NONE_na_crispri_208339	1268
0NONE_na_crispri_208342	588
0NONE_na_crispri_208343	1940
0NONE_na_crispri_208345	3209
0NONE_na_crispri_208351	1651
0NONE_na_crispri_208371	1478
0NONE_na_crispri_208377	2311
0NONE_na_crispri_208381	1525
0NONE_na_crispri_208383	919
0NONE_na_crispri_208385	3030
0NONE_na_crispri_208386	1286
0NONE_na_crispri_208396	201
0NONE_na_crispri_208399	1526
0NONE_na_crispri_208403	1807
0NONE_na_crispri_208409	1891
0NONE_na_crispri_208417	1889
0NONE_na_crispri_208429	724
0NONE_na_crispri_208434	2341
0NONE_na_crispri_208440	2971
0NONE_na_crispri_208446	2094
0NONE_na_crispri_208449	1871
0NONE_na_crispri_208455	3089
0NONE_na_crispri_208457	1641
0NONE_na_crispri_208463	2086
0NONE_na_crispri_208464	2383
0NONE_na_crispri_208465	4227
0NONE_na_crispri_208471	1953
0NONE_na_crispri_208473	1138
0NONE_na_crispri_208476	1479
0NONE_na_crispri_208482	1952
0NONE_na_crispri_208485	1176
0NONE_na_crispri_208487	2015
0NONE_na_crispri_208488	1109
0NONE_na_crispri_208490	1822
0NONE_na_crispri_208492	1321
0NONE_na_crispri_208493	1117
0NONE_na_crispri_208495	1682
0NONE_na_crispri_208500	1322
0NONE_na_crispri_208505	1988
0NONE_na_crispri_208514	1803
0NONE_na_crispri_208515	1444
0NONE_na_crispri_208518	862
0NONE_na_crispri_208521	849
0NONE_na_crispri_208533	126
0NONE_na_crispri_208536	1576
0NONE_na_crispri_208543	2334
0NONE_na_crispri_208546	1901
0NONE_na_crispri_208547	2402
0NONE_na_crispri_208548	407
0NONE_na_crispri_208558	2042
0NONE_na_crispri_208559	2004
0NONE_na_crispri_208560	5169
0NONE_na_crispri_208561	1521
0NONE_na_crispri_208564	2184
0NONE_na_crispri_208565	1006
0NONE_na_crispri_208569	1934
0NONE_na_crispri_208572	1810
0NONE_na_crispri_208575	797
0NONE_na_crispri_208578	1629
0NONE_na_crispri_208588	1938
0NONE_na_crispri_208589	2085
0NONE_na_crispri_208590	1864
0NONE_na_crispri_208608	14
0NONE_na_crispri_208610	3372
0NONE_na_crispri_208615	2118
0NONE_na_crispri_208616	1924
0NONE_na_crispri_208618	2886
0NONE_na_crispri_208619	2159
0NONE_na_crispri_208621	1986
0NONE_na_crispri_208627	1219
0NONE_na_crispri_208629	1606
0NONE_na_crispri_208633	1553
0NONE_na_crispri_208637	1169
0NONE_na_crispri_208640	4035
0NONE_na_crispri_208644	2853
0NONE_na_crispri_208646	1891
0NONE_na_crispri_208650	2682
0NONE_na_crispri_208652	1452
0NONE_na_crispri_208659	1080
0NONE_na_crispri_208660	2678
0NONE_na_crispri_208662	2725
0NONE_na_crispri_208665	2097
0NONE_na_crispri_208671	3159
0NONE_na_crispri_208678	2317
0NONE_na_crispri_208681	1473
0NONE_na_crispri_208685	2080
0NONE_na_crispri_208687	2524
0NONE_na_crispri_208689	1933
0NONE_na_crispri_208691	1023
0NONE_na_crispri_208694	113
0NONE_na_crispri_208700	2006
0NONE_na_crispri_208701	1267
0NONE_na_crispri_208702	1974
0NONE_na_crispri_208703	1346
0NONE_na_crispri_208707	1740
0NONE_na_crispri_208708	1986
0NONE_na_crispri_208715	995
0NONE_na_crispri_208717	1597
0NONE_na_crispri_208720	1309
0NONE_na_crispri_208724	1611
0NONE_na_crispri_208734	1297
0NONE_na_crispri_208740	1876
0NONE_na_crispri_208747	1316
0NONE_na_crispri_208750	1373
0NONE_na_crispri_208753	1169
0NONE_na_crispri_208756	1139
0NONE_na_crispri_208758	1457
0NONE_na_crispri_208763	1256
0NONE_na_crispri_208766	1769
0NONE_na_crispri_208776	1527
0NONE_na_crispri_208777	1329
0NONE_na_crispri_208791	828
0NONE_na_crispri_208796	2093
0NONE_na_crispri_208799	3182
0NONE_na_crispri_208803	846
0NONE_na_crispri_208804	2166
0NONE_na_crispri_208805	3080
0NONE_na_crispri_208808	2149
0NONE_na_crispri_208810	2334
0NONE_na_crispri_208812	2272
0NONE_na_crispri_208813	1512
0NONE_na_crispri_208818	1432
0NONE_na_crispri_208819	2285
0NONE_na_crispri_208833	958
0NONE_na_crispri_208834	1497
0NONE_na_crispri_208837	1364
0NONE_na_crispri_208839	2197
0NONE_na_crispri_208842	2093
0NONE_na_crispri_208843	937
0NONE_na_crispri_208849	1585
0NONE_na_crispri_208850	887
0NONE_na_crispri_208852	1956
0NONE_na_crispri_208859	1503
0NONE_na_crispri_208861	1352
0NONE_na_crispri_208871	2247
0NONE_na_crispri_208874	1003
0NONE_na_crispri_208877	1846
0NONE_na_crispri_208882	1109
0NONE_na_crispri_208901	1778
0NONE_na_crispri_208902	1682
0NONE_na_crispri_208903	1433
0NONE_na_crispri_208904	2617
0NONE_na_crispri_208906	1802
0NONE_na_crispri_208907	1347
0NONE_na_crispri_208909	1147
0NONE_na_crispri_208910	1707
0NONE_na_crispri_208912	1851
0NONE_na_crispri_208914	922
0NONE_na_crispri_208918	619
0NONE_na_crispri_208926	2806
0NONE_na_crispri_208927	2949
0NONE_na_crispri_208929	1463
0NONE_na_crispri_208931	140
0NONE_na_crispri_208934	229
0NONE_na_crispri_208936	2272
0NONE_na_crispri_208938	1774
0NONE_na_crispri_208944	2166
0NONE_na_crispri_208954	1181
0NONE_na_crispri_208958	1232
0NONE_na_crispri_208963	1514
0NONE_na_crispri_208969	1363
0NONE_na_crispri_208974	2290
0NONE_na_crispri_208977	1245
0NONE_na_crispri_208978	1471
0NONE_na_crispri_208992	1995
0NONE_na_crispri_208996	1721
0NONE_na_crispri_209000	1783
0NONE_na_crispri_209004	2575
0NONE_na_crispri_209006	2808
0NONE_na_crispri_209014	1048
0NONE_na_crispri_209016	1549
0NONE_na_crispri_209018	1520
0NONE_na_crispri_209021	1070
0NONE_na_crispri_209022	1357
0NONE_na_crispri_209027	1522
0NONE_na_crispri_209030	1539
0NONE_na_crispri_209033	1775
0NONE_na_crispri_209034	1515
0NONE_na_crispri_209036	3505
0NONE_na_crispri_209038	1642
0NONE_na_crispri_209042	1415
0NONE_na_crispri_209064	2266
0NONE_na_crispri_209065	1976
0NONE_na_crispri_209068	1575
0Safe_safe_ACOC_204555.4506	3034
0Safe_safe_ACOC_204560.4511	3388
0Safe_safe_ACOC_204571.4522	3023
0Safe_safe_ACOC_204575.4526	1035
0Safe_safe_ACOC_204590.4541	1946
0Safe_safe_ACOC_204599.4550	1318
0Safe_safe_ACOC_204608.4559	1792
0Safe_safe_ACOC_204611.4562	2489
0Safe_safe_ACOC_204625.4576	2975
0Safe_safe_ACOC_204627.4578	2273
0Safe_safe_ACOC_204629.4580	2012
0Safe_safe_ACOC_204632.4583	3821
0Safe_safe_ACOC_204663.4614	3034
0Safe_safe_ACOC_204669.4620	1104
0Safe_safe_ACOC_204672.4623	2633
0Safe_safe_ACOC_204678.4629	373
0Safe_safe_ACOC_204679.4630	2354
0Safe_safe_ACOC_204680.4631	2759
0Safe_safe_ACOC_204684.4635	4729
0Safe_safe_ACOC_204715.4666	1965
0Safe_safe_ACOC_204720.4671	3325
0Safe_safe_ACOC_204731.4682	1887
0Safe_safe_ACOC_204737.4688	2735
0Safe_safe_ACOC_204740.4691	2635
0Safe_safe_ACOC_204745.4696	2553
0Safe_safe_ACOC_204746.4697	1592
0Safe_safe_ACOC_204749.4700	1943
0Safe_safe_ACOC_204764.4715	2299
0Safe_safe_ACOC_204770.4721	2977
0Safe_safe_ACOC_204772.4723	3425
0Safe_safe_ACOC_204785.4736	1487
0Safe_safe_ACOC_204788.4739	4284
0Safe_safe_ACOC_204790.4741	2760
0Safe_safe_ACOC_204800.4751	2371
0Safe_safe_ACOC_204802.4753	2056
0Safe_safe_ACOC_204808.4759	1442
0Safe_safe_ACOC_204809.4760	3537
0Safe_safe_ACOC_204825.4776	3028
0Safe_safe_ACOC_204827.4778	2363
0Safe_safe_ACOC_204850.4801	2198
0Safe_safe_ACOC_204854.4805	2074
0Safe_safe_ACOC_204872.4823	1171
0Safe_safe_ACOC_204876.4827	2899
0Safe_safe_ACOC_204877.4828	2191
0Safe_safe_ACOC_204887.4838	1855
0Safe_safe_ACOC_204889.4840	2066
0Safe_safe_ACOC_204891.4842	1719
0Safe_safe_ACOC_204905.4856	1678
0Safe_safe_ACOC_204906.4857	2073
0Safe_safe_ACOC_204910.4861	2738
0Safe_safe_ACOC_204921.4872	2504
0Safe_safe_ACOC_204930.4881	1858
0Safe_safe_ACOC_204934.4885	1591
0Safe_safe_ACOC_204937.4888	1510
0Safe_safe_ACOC_204941.4892	2100
0Safe_safe_ACOC_204947.4898	2038
0Safe_safe_ACOC_204950.4901	1876
0Safe_safe_ACOC_204958.4909	1435
0Safe_safe_ACOC_204960.4911	2817
0Safe_safe_ACOC_204964.4915	3132
0Safe_safe_ACOC_204965.4916	2836
0Safe_safe_ACOC_204975.4926	2945
0Safe_safe_ACOC_205005.4956	2410
0Safe_safe_ACOC_205024.4975	2792
0Safe_safe_ACOC_205030.4981	2145
0Safe_safe_ACOC_205036.4987	2125
0Safe_safe_ACOC_205038.4989	1971
0Safe_safe_ACOC_205049.5000	1508
0Safe_safe_ACOC_205050.5001	3801
0Safe_safe_ACOC_205053.5004	3537
0Safe_safe_ACOC_205060.5011	1855
0Safe_safe_ACOC_205064.5015	1948
0Safe_safe_ACOC_205065.5016	3109
0Safe_safe_ACOC_205066.5017	2524
0Safe_safe_ACOC_205072.5023	2080
0Safe_safe_ACOC_205080.5031	1764
0Safe_safe_ACOC_205084.5035	2306
0Safe_safe_ACOC_205094.5045	1619
0Safe_safe_ACOC_205100.5051	1836
0Safe_safe_ACOC_205107.5058	2274
0Safe_safe_ACOC_205109.5060	1722
0Safe_safe_ACOC_205129.5080	1785
0Safe_safe_ACOC_205133.5084	1624
0Safe_safe_ACOC_205135.5086	2000
0Safe_safe_ACOC_205137.5088	3264
0Safe_safe_ACOC_205139.5090	2383
0Safe_safe_ACOC_205142.5093	3577
0Safe_safe_ACOC_205144.5095	3197
0Safe_safe_ACOC_205150.5101	3113
0Safe_safe_ACOC_205162.5113	2022
0Safe_safe_ACOC_205163.5114	2544
0Safe_safe_ACOC_205174.5125	3118
0Safe_safe_ACOC_205189.5140	2839
0Safe_safe_ACOC_205192.5143	2209
0Safe_safe_ACOC_205196.5147	2562
0Safe_safe_ACOC_205201.5152	2577
0Safe_safe_ACOC_205211.5162	2601
0Safe_safe_ACOC_205221.5172	2078
0Safe_safe_ACOC_205237.5188	2317
0Safe_safe_ACOC_205243.5194	1982
0Safe_safe_ACOC_205250.5201	1544
0Safe_safe_ACOC_205261.5212	2280
0Safe_safe_ACOC_205265.5216	3236
0Safe_safe_ACOC_205270.5221	1162
0Safe_safe_ACOC_205272.5223	1957
0Safe_safe_ACOC_205278.5229	1979
0Safe_safe_ACOC_205285.5236	1740
0Safe_safe_ACOC_205297.5248	2294
0Safe_safe_ACOC_205299.5250	2616
0Safe_safe_DTKP_205310.5261	2109
0Safe_safe_DTKP_205314.5265	2243
0Safe_safe_DTKP_205318.5269	2050
0Safe_safe_DTKP_205319.5270	2454
0Safe_safe_DTKP_205324.5275	2644
0Safe_safe_DTKP_205325.5276	2269
0Safe_safe_DTKP_205340.5291	3089
0Safe_safe_DTKP_205341.5292	2911
0Safe_safe_DTKP_205342.5293	2629
0Safe_safe_DTKP_205343.5294	1300
0Safe_safe_DTKP_205348.5299	1215
0Safe_safe_DTKP_205368.5319	1702
0Safe_safe_DTKP_205373.5324	2707
0Safe_safe_DTKP_205380.5331	3334
0Safe_safe_DTKP_205390.5341	2052
0Safe_safe_DTKP_205391.5342	1891
0Safe_safe_DTKP_205392.5343	2844
0Safe_safe_DTKP_205393.5344	725
0Safe_safe_DTKP_205411.5362	1714
0Safe_safe_DTKP_205422.5373	2404
0Safe_safe_DTKP_205423.5374	1781
0Safe_safe_DTKP_205424.5375	2220
0Safe_safe_DTKP_205448.5399	2803
0Safe_safe_DTKP_205449.5400	2694
0Safe_safe_DTKP_205477.5428	2174
0Safe_safe_DTKP_205480.5431	2470
0Safe_safe_DTKP_205483.5434	1168
0Safe_safe_DTKP_205488.5439	3703
0Safe_safe_DTKP_205490.5441	2593
0Safe_safe_DTKP_205492.5443	1738
0Safe_safe_DTKP_205504.5455	1305
0Safe_safe_DTKP_205505.5456	1760
0Safe_safe_DTKP_205509.5460	2359
0Safe_safe_DTKP_205511.5462	2600
0Safe_safe_DTKP_205513.5464	2161
0Safe_safe_DTKP_205521.5472	1797
0Safe_safe_DTKP_205529.5480	2674
0Safe_safe_DTKP_205533.5484	2124
0Safe_safe_DTKP_205538.5489	1625
0Safe_safe_DTKP_205539.5490	996
0Safe_safe_DTKP_205542.5493	2977
0Safe_safe_DTKP_205543.5494	3406
0Safe_safe_DTKP_205554.5505	4371
0Safe_safe_DTKP_205556.5507	2489
0Safe_safe_DTKP_205558.5509	2954
0Safe_safe_DTKP_205562.5513	4450
0Safe_safe_DTKP_205563.5514	1768
0Safe_safe_DTKP_205569.5520	1030
0Safe_safe_DTKP_205574.5525	784
0Safe_safe_DTKP_205581.5532	1488
0Safe_safe_DTKP_205584.5535	2584
0Safe_safe_DTKP_205585.5536	2294
0Safe_safe_DTKP_205591.5542	1346
0Safe_safe_DTKP_205599.5550	2424
0Safe_safe_DTKP_205613.5564	788
0Safe_safe_DTKP_205620.5571	3517
0Safe_safe_DTKP_205640.5591	1456
0Safe_safe_DTKP_205681.5632	1742
0Safe_safe_DTKP_205686.5637	2517
0Safe_safe_DTKP_205711.5662	2526
0Safe_safe_DTKP_205718.5669	3753
0Safe_safe_DTKP_205723.5674	1602
0Safe_safe_DTKP_205727.5678	2119
0Safe_safe_DTKP_205733.5684	1462
0Safe_safe_DTKP_205749.5700	2521
0Safe_safe_DTKP_205753.5704	3242
0Safe_safe_DTKP_205761.5712	1938
0Safe_safe_DTKP_205768.5719	3042
0Safe_safe_DTKP_205774.5725	2636
0Safe_safe_DTKP_205778.5729	1938
0Safe_safe_DTKP_205789.5740	2995
0Safe_safe_DTKP_205790.5741	1203
0Safe_safe_DTKP_205794.5745	3702
0Safe_safe_DTKP_205803.5754	1339
0Safe_safe_DTKP_205818.5769	2277
0Safe_safe_DTKP_205820.5771	2620
0Safe_safe_DTKP_205822.5773	1047
0Safe_safe_DTKP_205839.5790	3347
0Safe_safe_DTKP_205872.5823	2283
0Safe_safe_DTKP_205877.5828	1967
0Safe_safe_DTKP_205884.5835	3252
0Safe_safe_DTKP_205900.5851	2530
0Safe_safe_DTKP_205926.5877	2167
0Safe_safe_DTKP_205940.5891	2255
0Safe_safe_DTKP_205944.5895	1934
0Safe_safe_DTKP_205950.5901	3906
0Safe_safe_DTKP_205963.5914	3082
0Safe_safe_DTKP_205983.5934	2534
0Safe_safe_DTKP_205986.5937	3103
0Safe_safe_DTKP_205988.5939	2754
0Safe_safe_DTKP_205992.5943	1400
0Safe_safe_DTKP_205998.5949	1496
0Safe_safe_DTKP_206016.5967	2451
0Safe_safe_DTKP_206017.5968	1830
0Safe_safe_DTKP_206021.5972	1873
0Safe_safe_DTKP_206023.5974	1993
0Safe_safe_DTKP_206030.5981	1802
0Safe_safe_DTKP_206036.5987	2509
0Safe_safe_DTKP_206045.5996	2906
0Safe_safe_DTKP_206046.5997	4146
0Safe_safe_GEEX_206053.1504	2555
0Safe_safe_GEEX_206056.1507	3648
0Safe_safe_GEEX_206061.1512	2747
0Safe_safe_GEEX_206067.1518	2890
0Safe_safe_GEEX_206081.1532	2498
0Safe_safe_GEEX_206095.1546	2243
0Safe_safe_GEEX_206113.1564	1011
0Safe_safe_GEEX_206119.1570	2035
0Safe_safe_GEEX_206123.1574	1706
0Safe_safe_GEEX_206125.1576	1273
0Safe_safe_GEEX_206126.1577	3450
0Safe_safe_GEEX_206141.1592	3924
0Safe_safe_GEEX_206146.1597	2908
0Safe_safe_GEEX_206147.1598	3033
0Safe_safe_GEEX_206148.1599	2560
0Safe_safe_GEEX_206149.1600	1326
0Safe_safe_GEEX_206154.1605	2446
0Safe_safe_GEEX_206155.1606	740
0Safe_safe_GEEX_206156.1607	2937
0Safe_safe_GEEX_206164.1615	4603
0Safe_safe_GEEX_206167.1618	3146
0Safe_safe_GEEX_206170.1621	2695
0Safe_safe_GEEX_206192.1643	2973
0Safe_safe_GEEX_206199.1650	2187
0Safe_safe_GEEX_206206.1657	1532
0Safe_safe_GEEX_206210.1661	2402
0Safe_safe_GEEX_206217.1668	3692
0Safe_safe_GEEX_206232.1683	2033
0Safe_safe_GEEX_206235.1686	3202
0Safe_safe_GEEX_206236.1687	2020
0Safe_safe_GEEX_206238.1689	3107
0Safe_safe_GEEX_206242.1693	756
0Safe_safe_GEEX_206243.1694	1770
0Safe_safe_GEEX_206251.1702	2109
0Safe_safe_GEEX_206253.1704	3323
0Safe_safe_GEEX_206254.1705	2250
0Safe_safe_GEEX_206258.1709	1865
0Safe_safe_GEEX_206259.1710	1743
0Safe_safe_GEEX_206268.1719	2940
0Safe_safe_GEEX_206273.1724	2408
0Safe_safe_GEEX_206276.1727	1593
0Safe_safe_GEEX_206290.1741	1701
0Safe_safe_GEEX_206293.1744	3118
0Safe_safe_GEEX_206294.1745	1955
0Safe_safe_GEEX_206301.1752	1909
0Safe_safe_GEEX_206305.1756	3033
0Safe_safe_GEEX_206311.1762	1312
0Safe_safe_GEEX_206321.1772	1809
0Safe_safe_GEEX_206325.1776	3149
0Safe_safe_GEEX_206329.1780	1720
0Safe_safe_GEEX_206335.1786	1536
0Safe_safe_GEEX_206336.1787	2748
0Safe_safe_GEEX_206338.1789	1900
0Safe_safe_GEEX_206346.1797	1632
0Safe_safe_GEEX_206352.1803	3334
0Safe_safe_GEEX_206359.1810	2006
0Safe_safe_GEEX_206374.1825	2064
0Safe_safe_GEEX_206375.1826	3383
0Safe_safe_GEEX_206383.1834	2261
0Safe_safe_GEEX_206391.1842	1908
0Safe_safe_GEEX_206394.1845	2934
0Safe_safe_GEEX_206399.1850	3153
0Safe_safe_GEEX_206400.1851	2035
0Safe_safe_GEEX_206405.1856	3414
0Safe_safe_GEEX_206411.1862	3048
0Safe_safe_GEEX_206415.1866	1601
0Safe_safe_GEEX_206417.1868	2266
0Safe_safe_GEEX_206421.1872	3037
0Safe_safe_GEEX_206440.1891	3521
0Safe_safe_GEEX_206443.1894	5135
0Safe_safe_GEEX_206445.1896	3572
0Safe_safe_GEEX_206451.1902	2325
0Safe_safe_GEEX_206463.1914	2261
0Safe_safe_GEEX_206501.1952	2611
0Safe_safe_GEEX_206502.1953	2194
0Safe_safe_GEEX_206507.1958	2539
0Safe_safe_GEEX_206510.1961	960
0Safe_safe_GEEX_206522.1973	1691
0Safe_safe_GEEX_206526.1977	2556
0Safe_safe_GEEX_206530.1981	1839
0Safe_safe_GEEX_206541.1992	2335
0Safe_safe_GEEX_206547.1998	1542
0Safe_safe_GEEX_206551.2002	3924
0Safe_safe_GEEX_206552.2003	1463
0Safe_safe_GEEX_206553.2004	2685
0Safe_safe_GEEX_206557.2008	2346
0Safe_safe_GEEX_206565.2016	1223
0Safe_safe_GEEX_206580.2031	2928
0Safe_safe_GEEX_206583.2034	3995
0Safe_safe_GEEX_206585.2036	2346
0Safe_safe_GEEX_206587.2038	2786
0Safe_safe_GEEX_206588.2039	2040
0Safe_safe_GEEX_206597.2048	2395
0Safe_safe_GEEX_206613.2064	1297
0Safe_safe_GEEX_206626.2077	3665
0Safe_safe_GEEX_206642.2093	1569
0Safe_safe_GEEX_206648.2099	2420
0Safe_safe_GEEX_206649.2100	1888
0Safe_safe_GEEX_206676.2127	3002
0Safe_safe_GEEX_206685.2136	2419
0Safe_safe_GEEX_206705.2156	2834
0Safe_safe_GEEX_206720.2171	1620
0Safe_safe_GEEX_206730.2181	1697
0Safe_safe_GEEX_206731.2182	2120
0Safe_safe_GEEX_206743.2194	1601
0Safe_safe_GEEX_206747.2198	1256
0Safe_safe_GEEX_206753.2204	1452
0Safe_safe_GEEX_206760.2211	3125
0Safe_safe_GEEX_206774.2225	2226
0Safe_safe_GEEX_206778.2229	703
0Safe_safe_GEEX_206781.2232	3700
0Safe_safe_GEEX_206784.2235	1901
0Safe_safe_GEEX_206792.2243	2553
0Safe_safe_GEEX_206793.2244	2583
0Safe_safe_MEPR_206803.1003	1988
0Safe_safe_MEPR_206804.1004	1773
0Safe_safe_MEPR_206807.1007	1846
0Safe_safe_MEPR_206810.1010	2154
0Safe_safe_MEPR_206814.1014	4194
0Safe_safe_MEPR_206826.1026	3796
0Safe_safe_MEPR_206827.1027	3035
0Safe_safe_MEPR_206843.1043	1914
0Safe_safe_MEPR_206857.1057	3000
0Safe_safe_MEPR_206859.1059	3396
0Safe_safe_MEPR_206869.1069	2524
0Safe_safe_MEPR_206870.1070	1980
0Safe_safe_MEPR_206876.1076	2140
0Safe_safe_MEPR_206891.1091	2399
0Safe_safe_MEPR_206892.1092	2780
0Safe_safe_MEPR_206896.1096	1395
0Safe_safe_MEPR_206901.1101	3264
0Safe_safe_MEPR_206914.1114	1944
0Safe_safe_MEPR_206916.1116	1912
0Safe_safe_MEPR_206918.1118	2053
0Safe_safe_MEPR_206921.1121	2385
0Safe_safe_MEPR_206930.1130	1215
0Safe_safe_MEPR_206935.1135	3413
0Safe_safe_MEPR_206938.1138	2176
0Safe_safe_MEPR_206951.1151	3564
0Safe_safe_MEPR_206960.1160	2406
0Safe_safe_MEPR_206961.1161	1066
0Safe_safe_MEPR_206965.1165	2588
0Safe_safe_MEPR_206968.1168	889
0Safe_safe_MEPR_206970.1170	4063
0Safe_safe_MEPR_206976.1176	2947
0Safe_safe_MEPR_206979.1179	2046
0Safe_safe_MEPR_206983.1183	2080
0Safe_safe_MEPR_206989.1189	1638
0Safe_safe_MEPR_207012.1212	2336
0Safe_safe_MEPR_207015.1215	2314
0Safe_safe_MEPR_207019.1219	3018
0Safe_safe_MEPR_207025.1225	1473
0Safe_safe_MEPR_207028.1228	2499
0Safe_safe_MEPR_207030.1230	668
0Safe_safe_MEPR_207031.1231	805
0Safe_safe_MEPR_207036.1236	2523
0Safe_safe_MEPR_207037.1237	2347
0Safe_safe_MEPR_207042.1242	1307
0Safe_safe_MEPR_207045.1245	2902
0Safe_safe_MEPR_207057.1257	2868
0Safe_safe_MEPR_207060.1260	3036
0Safe_safe_MEPR_207070.1270	2280
0Safe_safe_MEPR_207071.1271	2252
0Safe_safe_MEPR_207073.1273	1969
0Safe_safe_MEPR_207101.1301	1032
0Safe_safe_MEPR_207106.1306	976
0Safe_safe_MEPR_207108.1308	1785
0Safe_safe_MEPR_207112.1312	2141
0Safe_safe_MEPR_207133.1333	2099
0Safe_safe_MEPR_207148.1348	3135
0Safe_safe_MEPR_207151.1351	2495
0Safe_safe_MEPR_207158.1358	2052
0Safe_safe_MEPR_207162.1362	1576
0Safe_safe_MEPR_207168.1368	2426
0Safe_safe_MEPR_207169.1369	1718
0Safe_safe_MEPR_207173.1373	1507
0Safe_safe_MEPR_207175.1375	1010
0Safe_safe_MEPR_207181.1381	2329
0Safe_safe_MEPR_207196.1396	4367
0Safe_safe_MEPR_207198.1398	2815
0Safe_safe_MEPR_207203.1403	2099
0Safe_safe_MEPR_207215.1415	1550
0Safe_safe_MEPR_207254.1454	2053
0Safe_safe_MEPR_207260.1460	1825
0Safe_safe_MEPR_207271.1471	3209
0Safe_safe_MEPR_207273.1473	2706
0Safe_safe_MEPR_207276.1476	2902
0Safe_safe_MEPR_207297.1497	968
0Safe_safe_MEPR_207300.1500	3894
0Safe_safe_MEPR_207304.754	3021
0Safe_safe_MEPR_207323.773	2923
0Safe_safe_MEPR_207325.775	3896
0Safe_safe_MEPR_207329.779	3641
0Safe_safe_MEPR_207331.781	2396
0Safe_safe_MEPR_207334.784	1583
0Safe_safe_MEPR_207339.789	426
0Safe_safe_MEPR_207347.797	1704
0Safe_safe_MEPR_207348.798	2743
0Safe_safe_MEPR_207351.801	625
0Safe_safe_MEPR_207381.831	1087
0Safe_safe_MEPR_207386.836	1542
0Safe_safe_MEPR_207387.837	3428
0Safe_safe_MEPR_207389.839	3432
0Safe_safe_MEPR_207392.842	1930
0Safe_safe_MEPR_207397.847	2515
0Safe_safe_MEPR_207402.852	3568
0Safe_safe_MEPR_207413.863	2260
0Safe_safe_MEPR_207414.864	2547
0Safe_safe_MEPR_207429.879	3279
0Safe_safe_MEPR_207454.904	3454
0Safe_safe_MEPR_207455.905	1827
0Safe_safe_MEPR_207456.906	1214
0Safe_safe_MEPR_207462.912	4392
0Safe_safe_MEPR_207467.917	2278
0Safe_safe_MEPR_207471.921	2404
0Safe_safe_MEPR_207478.928	3074
0Safe_safe_MEPR_207481.931	1559
0Safe_safe_MEPR_207484.934	1308
0Safe_safe_MEPR_207486.936	884
0Safe_safe_MEPR_207487.937	1985
0Safe_safe_MEPR_207488.938	2086
0Safe_safe_MEPR_207490.940	998
0Safe_safe_MEPR_207491.941	1933
0Safe_safe_MEPR_207494.944	1910
0Safe_safe_MEPR_207495.945	1589
0Safe_safe_MEPR_207497.947	1986
0Safe_safe_MEPR_207500.950	2209
0Safe_safe_MEPR_207502.952	2482
0Safe_safe_MEPR_207518.968	1994
0Safe_safe_MEPR_207534.984	3210
0Safe_safe_MEPR_207542.992	2542
0Safe_safe_MEPR_207544.994	2203
0Safe_safe_PROT_207550.2251	3212
0Safe_safe_PROT_207553.2254	2440
0Safe_safe_PROT_207554.2255	1581
0Safe_safe_PROT_207559.2260	919
0Safe_safe_PROT_207566.2267	1977
0Safe_safe_PROT_207578.2279	2405
0Safe_safe_PROT_207581.2282	1984
0Safe_safe_PROT_207597.2298	1069
0Safe_safe_PROT_207600.2301	1941
0Safe_safe_PROT_207604.2305	2382
0Safe_safe_PROT_207605.2306	3315
0Safe_safe_PROT_207610.2311	785
0Safe_safe_PROT_207611.2312	2503
0Safe_safe_PROT_207617.2318	1675
0Safe_safe_PROT_207628.2329	1507
0Safe_safe_PROT_207631.2332	2679
0Safe_safe_PROT_207634.2335	1349
0Safe_safe_PROT_207643.2344	2673
0Safe_safe_PROT_207645.2346	2533
0Safe_safe_PROT_207653.2354	2947
0Safe_safe_PROT_207662.2363	3464
0Safe_safe_PROT_207675.2376	2005
0Safe_safe_PROT_207698.2399	2864
0Safe_safe_PROT_207700.2401	3685
0Safe_safe_PROT_207702.2403	952
0Safe_safe_PROT_207703.2404	2018
0Safe_safe_PROT_207730.2431	1958
0Safe_safe_PROT_207734.2435	1852
0Safe_safe_PROT_207736.2437	2912
0Safe_safe_PROT_207737.2438	4198
0Safe_safe_PROT_207739.2440	1576
0Safe_safe_PROT_207741.2442	1084
0Safe_safe_PROT_207786.2487	1971
0Safe_safe_PROT_207794.2495	524
0Safe_safe_PROT_207801.2502	965
0Safe_safe_PROT_207802.2503	3401
0Safe_safe_PROT_207827.2528	2536
0Safe_safe_PROT_207833.2534	1704
0Safe_safe_PROT_207836.2537	1608
0Safe_safe_PROT_207841.2542	1432
0Safe_safe_PROT_207844.2545	3179
0Safe_safe_PROT_207847.2548	2180
0Safe_safe_PROT_207854.2555	1911
0Safe_safe_PROT_207862.2563	2193
0Safe_safe_PROT_207863.2564	2191
0Safe_safe_PROT_207876.2577	1530
0Safe_safe_PROT_207878.2579	3283
0Safe_safe_PROT_207887.2588	1110
0Safe_safe_PROT_207896.2597	1909
0Safe_safe_PROT_207901.2602	1281
0Safe_safe_PROT_207908.2609	1437
0Safe_safe_PROT_207912.2613	2561
0Safe_safe_PROT_207914.2615	2530
0Safe_safe_PROT_207916.2617	1598
0Safe_safe_PROT_207926.2627	2505
0Safe_safe_PROT_207928.2629	1609
0Safe_safe_PROT_207931.2632	2505
0Safe_safe_PROT_207932.2633	2114
0Safe_safe_PROT_207933.2634	4042
0Safe_safe_PROT_207936.2637	2089
0Safe_safe_PROT_207937.2638	1390
0Safe_safe_PROT_207949.2650	2498
0Safe_safe_PROT_207952.2653	1659
0Safe_safe_PROT_207960.2661	2928
0Safe_safe_PROT_207962.2663	1915
0Safe_safe_PROT_207973.2674	2378
0Safe_safe_PROT_207980.2681	4372
0Safe_safe_PROT_207983.2684	1882
0Safe_safe_PROT_207986.2687	3421
0Safe_safe_PROT_207990.2691	3166
0Safe_safe_PROT_207992.2693	2467
0Safe_safe_PROT_208008.2709	1651
0Safe_safe_PROT_208009.2710	1613
0Safe_safe_PROT_208013.2714	3073
0Safe_safe_PROT_208021.2722	2090
0Safe_safe_PROT_208030.2731	2022
0Safe_safe_PROT_208031.2732	2348
0Safe_safe_PROT_208032.2733	1886
0Safe_safe_PROT_208035.2736	3104
0Safe_safe_PROT_208041.2742	1904
0Safe_safe_PROT_208044.2745	2226
0Safe_safe_PROT_208046.2747	3861
0Safe_safe_PROT_208050.2751	1984
0Safe_safe_PROT_208051.2752	2127
0Safe_safe_PROT_208054.2755	1716
0Safe_safe_PROT_208062.2763	3312
0Safe_safe_PROT_208082.2783	1114
0Safe_safe_PROT_208086.2787	2781
0Safe_safe_PROT_208087.2788	3246
0Safe_safe_PROT_208095.2796	3652
0Safe_safe_PROT_208096.2797	1695
0Safe_safe_PROT_208101.2802	3518
0Safe_safe_PROT_208106.2807	1685
0Safe_safe_PROT_208111.2812	2085
0Safe_safe_PROT_208127.2828	4411
0Safe_safe_PROT_208148.2849	2265
0Safe_safe_PROT_208165.2866	2832
0Safe_safe_PROT_208166.2867	2482
0Safe_safe_PROT_208174.2875	1643
0Safe_safe_PROT_208177.2878	2557
0Safe_safe_PROT_208180.2881	2687
0Safe_safe_PROT_208181.2882	2228
0Safe_safe_PROT_208190.2891	1639
0Safe_safe_PROT_208213.2914	2486
0Safe_safe_PROT_208219.2920	3025
0Safe_safe_PROT_208220.2921	1703
0Safe_safe_PROT_208222.2923	4352
0Safe_safe_PROT_208232.2933	2140
0Safe_safe_PROT_208233.2934	4112
0Safe_safe_PROT_208235.2936	2381
0Safe_safe_PROT_208237.2938	4768
0Safe_safe_PROT_208247.2948	3583
0Safe_safe_PROT_208248.2949	1795
0Safe_safe_PROT_208262.2963	2082
0Safe_safe_PROT_208263.2964	3414
0Safe_safe_PROT_208267.2968	2398
0Safe_safe_PROT_208268.2969	2350
0Safe_safe_PROT_208269.2970	2615
0Safe_safe_PROT_208276.2977	2193
0Safe_safe_PROT_208288.2989	3595
0Safe_safe_PROT_208299.3000	3415
0Safe_safe_TMMO_208300.1	1631
0Safe_safe_TMMO_208309.107	2838
0Safe_safe_TMMO_208317.114	3817
0Safe_safe_TMMO_208324.120	2535
0Safe_safe_TMMO_208335.130	2657
0Safe_safe_TMMO_208340.135	2671
0Safe_safe_TMMO_208349.143	2124
0Safe_safe_TMMO_208368.160	3794
0Safe_safe_TMMO_208381.172	1758
0Safe_safe_TMMO_208382.173	2439
0Safe_safe_TMMO_208393.183	2138
0Safe_safe_TMMO_208399.189	2422
0Safe_safe_TMMO_208401.190	2216
0Safe_safe_TMMO_208403.192	2509
0Safe_safe_TMMO_208410.199	1644
0Safe_safe_TMMO_208416.203	2012
0Safe_safe_TMMO_208429.215	753
0Safe_safe_TMMO_208438.223	2394
0Safe_safe_TMMO_208439.224	4409
0Safe_safe_TMMO_208451.235	2575
0Safe_safe_TMMO_208454.238	1559
0Safe_safe_TMMO_208475.257	2747
0Safe_safe_TMMO_208485.266	1368
0Safe_safe_TMMO_208492.272	3518
0Safe_safe_TMMO_208506.285	3497
0Safe_safe_TMMO_208531.307	1751
0Safe_safe_TMMO_208535.310	1613
0Safe_safe_TMMO_208541.316	1888
0Safe_safe_TMMO_208549.323	3517
0Safe_safe_TMMO_208574.346	2447
0Safe_safe_TMMO_208576.348	4583
0Safe_safe_TMMO_208577.349	2593
0Safe_safe_TMMO_208582.353	2800
0Safe_safe_TMMO_208583.354	2837
0Safe_safe_TMMO_208590.360	2507
0Safe_safe_TMMO_208611.38	1795
0Safe_safe_TMMO_208614.382	1683
0Safe_safe_TMMO_208616.384	2464
0Safe_safe_TMMO_208618.386	1969
0Safe_safe_TMMO_208628.395	3067
0Safe_safe_TMMO_208630.397	1229
0Safe_safe_TMMO_208631.398	2948
0Safe_safe_TMMO_208634.40	1122
0Safe_safe_TMMO_208649.413	1691
0Safe_safe_TMMO_208654.418	2384
0Safe_safe_TMMO_208657.420	2324
0Safe_safe_TMMO_208677.439	2277
0Safe_safe_TMMO_208691.451	1783
0Safe_safe_TMMO_208697.457	2768
0Safe_safe_TMMO_208704.463	2385
0Safe_safe_TMMO_208707.466	218
0Safe_safe_TMMO_208710.469	1897
0Safe_safe_TMMO_208724.481	2168
0Safe_safe_TMMO_208726.483	2338
0Safe_safe_TMMO_208727.484	2002
0Safe_safe_TMMO_208730.487	2796
0Safe_safe_TMMO_208735.491	1745
0Safe_safe_TMMO_208737.493	2859
0Safe_safe_TMMO_208739.495	1134
0Safe_safe_TMMO_208756.51	2899
0Safe_safe_TMMO_208773.525	3157
0Safe_safe_TMMO_208778.53	3342
0Safe_safe_TMMO_208786.537	1907
0Safe_safe_TMMO_208793.543	2853
0Safe_safe_TMMO_208794.544	1840
0Safe_safe_TMMO_208799.549	2120
0Safe_safe_TMMO_208802.551	1927
0Safe_safe_TMMO_208805.554	3096
0Safe_safe_TMMO_208812.560	2473
0Safe_safe_TMMO_208831.578	1759
0Safe_safe_TMMO_208832.579	2904
0Safe_safe_TMMO_208854.599	2346
0Safe_safe_TMMO_208867.61	3621
0Safe_safe_TMMO_208868.610	2572
0Safe_safe_TMMO_208882.623	2206
0Safe_safe_TMMO_208886.627	2096
0Safe_safe_TMMO_208911.65	2795
0Safe_safe_TMMO_208913.651	3003
0Safe_safe_TMMO_208917.655	3617
0Safe_safe_TMMO_208918.656	3243
0Safe_safe_TMMO_208919.657	924
0Safe_safe_TMMO_208926.663	4865
0Safe_safe_TMMO_208939.675	3765
0Safe_safe_TMMO_208947.682	2404
0Safe_safe_TMMO_208958.692	2495
0Safe_safe_TMMO_208962.696	1825
0Safe_safe_TMMO_208963.697	1342
0Safe_safe_TMMO_208980.711	2218
0Safe_safe_TMMO_208983.714	2421
0Safe_safe_TMMO_208990.720	3196
0Safe_safe_TMMO_208993.723	2114
0Safe_safe_TMMO_208997.727	1577
0Safe_safe_TMMO_209005.734	1230
0Safe_safe_TMMO_209012.740	2019
0Safe_safe_TMMO_209013.741	2533
0Safe_safe_TMMO_209016.744	1675
0Safe_safe_TMMO_209019.747	2781
0Safe_safe_TMMO_209022.75	1957
0Safe_safe_TMMO_209024.76	3697
0Safe_safe_TMMO_209025.77	2711
0Safe_safe_TMMO_209031.82	2590
0Safe_safe_TMMO_209036.87	951
0Safe_safe_TMMO_209039.9	1311
0Safe_safe_TMMO_209043.93	2118
0Safe_safe_UNA1_209066.3767	2904
0Safe_safe_UNA1_209072.3773	2930
0Safe_safe_UNA1_209089.3790	2897
0Safe_safe_UNA1_209095.3796	2266
0Safe_safe_UNA1_209107.3808	4056
0Safe_safe_UNA1_209114.3815	2439
0Safe_safe_UNA1_209119.3820	1733
0Safe_safe_UNA1_209126.3827	1622
0Safe_safe_UNA1_209127.3828	2016
0Safe_safe_UNA1_209137.3838	1421
0Safe_safe_UNA1_209150.3851	3278
0Safe_safe_UNA1_209153.3854	3644
0Safe_safe_UNA1_209162.3863	2653
0Safe_safe_UNA1_209166.3867	3374
0Safe_safe_UNA1_209181.3882	2198
0Safe_safe_UNA1_209182.3883	1297
0Safe_safe_UNA1_209187.3888	1750
0Safe_safe_UNA1_209191.3892	2492
0Safe_safe_UNA1_209192.3893	1808
0Safe_safe_UNA1_209194.3895	2705
0Safe_safe_UNA1_209198.3899	1724
0Safe_safe_UNA1_209205.3906	4169
0Safe_safe_UNA1_209206.3907	1538
0Safe_safe_UNA1_209208.3909	4068
0Safe_safe_UNA1_209212.3913	2392
0Safe_safe_UNA1_209217.3918	124
0Safe_safe_UNA1_209218.3919	1619
0Safe_safe_UNA1_209236.3937	4665
0Safe_safe_UNA1_209245.3946	2514
0Safe_safe_UNA1_209266.3967	3159
0Safe_safe_UNA1_209280.3981	1510
0Safe_safe_UNA1_209283.3984	2300
0Safe_safe_UNA1_209289.3990	2032
0Safe_safe_UNA1_209292.3993	1902
0Safe_safe_UNA1_209294.3995	3486
0Safe_safe_UNA1_209313.4014	2519
0Safe_safe_UNA1_209320.4021	3082
0Safe_safe_UNA1_209331.4032	2607
0Safe_safe_UNA1_209340.4041	2322
0Safe_safe_UNA1_209344.4045	3626
0Safe_safe_UNA1_209349.4050	2575
0Safe_safe_UNA1_209352.4053	2648
0Safe_safe_UNA1_209353.4054	2592
0Safe_safe_UNA1_209355.4056	641
0Safe_safe_UNA1_209358.4059	1645
0Safe_safe_UNA1_209365.4066	1729
0Safe_safe_UNA1_209366.4067	1662
0Safe_safe_UNA1_209372.4073	1208
0Safe_safe_UNA1_209373.4074	2635
0Safe_safe_UNA1_209380.4081	3512
0Safe_safe_UNA1_209387.4088	1899
0Safe_safe_UNA1_209411.4112	2670
0Safe_safe_UNA1_209413.4114	3009
0Safe_safe_UNA1_209424.4125	2983
0Safe_safe_UNA1_209433.4134	1963
0Safe_safe_UNA1_209436.4137	2107
0Safe_safe_UNA1_209441.4142	2897
0Safe_safe_UNA1_209445.4146	1435
0Safe_safe_UNA1_209446.4147	2640
0Safe_safe_UNA1_209464.4165	776
0Safe_safe_UNA1_209467.4168	2709
0Safe_safe_UNA1_209471.4172	790
0Safe_safe_UNA1_209473.4174	1487
0Safe_safe_UNA1_209474.4175	2612
0Safe_safe_UNA1_209477.4178	2489
0Safe_safe_UNA1_209479.4180	1894
0Safe_safe_UNA1_209485.4186	2010
0Safe_safe_UNA1_209487.4188	1982
0Safe_safe_UNA1_209508.4209	2646
0Safe_safe_UNA1_209510.4211	1656
0Safe_safe_UNA1_209513.4214	1740
0Safe_safe_UNA1_209517.4218	3259
0Safe_safe_UNA1_209523.4224	1425
0Safe_safe_UNA1_209524.4225	2595
0Safe_safe_UNA1_209525.4226	2208
0Safe_safe_UNA1_209533.4234	2643
0Safe_safe_UNA1_209546.4247	3290
0Safe_safe_UNA1_209548.4249	1652
0Safe_safe_UNA1_209564.4265	3398
0Safe_safe_UNA1_209580.4281	2938
0Safe_safe_UNA1_209583.4284	3391
0Safe_safe_UNA1_209591.4292	1004
0Safe_safe_UNA1_209595.4296	1198
0Safe_safe_UNA1_209603.4304	1539
0Safe_safe_UNA1_209608.4309	2103
0Safe_safe_UNA1_209612.4313	2697
0Safe_safe_UNA1_209627.4328	2407
0Safe_safe_UNA1_209631.4332	1975
0Safe_safe_UNA1_209633.4334	1447
0Safe_safe_UNA1_209639.4340	3533
0Safe_safe_UNA1_209642.4343	2361
0Safe_safe_UNA1_209645.4346	2363
0Safe_safe_UNA1_209646.4347	1897
0Safe_safe_UNA1_209661.4362	1542
0Safe_safe_UNA1_209678.4379	2451
0Safe_safe_UNA1_209684.4385	1930
0Safe_safe_UNA1_209685.4386	2579
0Safe_safe_UNA1_209692.4393	2709
0Safe_safe_UNA1_209693.4394	3403
0Safe_safe_UNA1_209702.4403	2351
0Safe_safe_UNA1_209707.4408	3194
0Safe_safe_UNA1_209708.4409	3252
0Safe_safe_UNA1_209714.4415	1549
0Safe_safe_UNA1_209718.4419	2272
0Safe_safe_UNA1_209726.4427	1172
0Safe_safe_UNA1_209732.4433	1918
0Safe_safe_UNA1_209735.4436	4090
0Safe_safe_UNA1_209738.4439	2017
0Safe_safe_UNA1_209753.4454	2545
0Safe_safe_UNA1_209776.4477	1513
0Safe_safe_UNA1_209779.4480	2641
0Safe_safe_UNA1_209781.4482	1304
0Safe_safe_UNA2_209806.3007	3741
0Safe_safe_UNA2_209807.3008	2337
0Safe_safe_UNA2_209811.3012	42
0Safe_safe_UNA2_209817.3018	2804
0Safe_safe_UNA2_209819.3020	2408
0Safe_safe_UNA2_209840.3041	3154
0Safe_safe_UNA2_209851.3052	1173
0Safe_safe_UNA2_209866.3067	1286
0Safe_safe_UNA2_209870.3071	1452
0Safe_safe_UNA2_209872.3073	2643
0Safe_safe_UNA2_209888.3089	1894
0Safe_safe_UNA2_209890.3091	767
0Safe_safe_UNA2_209891.3092	2046
0Safe_safe_UNA2_209896.3097	3252
0Safe_safe_UNA2_209912.3113	2658
0Safe_safe_UNA2_209918.3119	1446
0Safe_safe_UNA2_209924.3125	3098
0Safe_safe_UNA2_209925.3126	2444
0Safe_safe_UNA2_209936.3137	3484
0Safe_safe_UNA2_209941.3142	3388
0Safe_safe_UNA2_209947.3148	2029
0Safe_safe_UNA2_209950.3151	2752
0Safe_safe_UNA2_209958.3159	2006
0Safe_safe_UNA2_209977.3178	3279
0Safe_safe_UNA2_209981.3182	3825
0Safe_safe_UNA2_210003.3204	3200
0Safe_safe_UNA2_210034.3235	1914
0Safe_safe_UNA2_210050.3251	1537
0Safe_safe_UNA2_210057.3258	1895
0Safe_safe_UNA2_210059.3260	1625
0Safe_safe_UNA2_210077.3278	1224
0Safe_safe_UNA2_210081.3282	2279
0Safe_safe_UNA2_210083.3284	3338
0Safe_safe_UNA2_210085.3286	3325
0Safe_safe_UNA2_210091.3292	2601
0Safe_safe_UNA2_210094.3295	2248
0Safe_safe_UNA2_210096.3297	1256
0Safe_safe_UNA2_210101.3302	1564
0Safe_safe_UNA2_210120.3321	1066
0Safe_safe_UNA2_210135.3336	1857
0Safe_safe_UNA2_210139.3340	2198
0Safe_safe_UNA2_210153.3354	2805
0Safe_safe_UNA2_210155.3356	3255
0Safe_safe_UNA2_210156.3357	2096
0Safe_safe_UNA2_210166.3367	1485
0Safe_safe_UNA2_210168.3369	2407
0Safe_safe_UNA2_210183.3384	1087
0Safe_safe_UNA2_210185.3386	3101
0Safe_safe_UNA2_210192.3393	2400
0Safe_safe_UNA2_210193.3394	1709
0Safe_safe_UNA2_210200.3401	1703
0Safe_safe_UNA2_210202.3403	2876
0Safe_safe_UNA2_210204.3405	2010
0Safe_safe_UNA2_210206.3407	2343
0Safe_safe_UNA2_210221.3422	1498
0Safe_safe_UNA2_210223.3424	2234
0Safe_safe_UNA2_210226.3427	928
0Safe_safe_UNA2_210227.3428	3018
0Safe_safe_UNA2_210236.3437	1931
0Safe_safe_UNA2_210241.3442	1726
0Safe_safe_UNA2_210247.3448	1955
0Safe_safe_UNA2_210258.3459	2373
0Safe_safe_UNA2_210265.3466	2289
0Safe_safe_UNA2_210283.3484	1543
0Safe_safe_UNA2_210288.3489	2535
0Safe_safe_UNA2_210292.3493	3706
0Safe_safe_UNA2_210294.3495	1649
0Safe_safe_UNA2_210298.3499	1401
0Safe_safe_UNA2_210299.3500	2451
0Safe_safe_UNA2_210312.3513	808
0Safe_safe_UNA2_210313.3514	3188
0Safe_safe_UNA2_210321.3522	1761
0Safe_safe_UNA2_210327.3528	1811
0Safe_safe_UNA2_210337.3538	3176
0Safe_safe_UNA2_210341.3542	1387
0Safe_safe_UNA2_210351.3552	3757
0Safe_safe_UNA2_210357.3558	2128
0Safe_safe_UNA2_210358.3559	3249
0Safe_safe_UNA2_210363.3564	2090
0Safe_safe_UNA2_210373.3574	2698
0Safe_safe_UNA2_210378.3579	1425
0Safe_safe_UNA2_210388.3589	1957
0Safe_safe_UNA2_210402.3603	2994
0Safe_safe_UNA2_210419.3620	2559
0Safe_safe_UNA2_210420.3621	2416
0Safe_safe_UNA2_210434.3635	1580
0Safe_safe_UNA2_210459.3660	1532
0Safe_safe_UNA2_210478.3679	2182
0Safe_safe_UNA2_210480.3681	809
0Safe_safe_UNA2_210483.3684	3407
0Safe_safe_UNA2_210487.3688	2497
0Safe_safe_UNA2_210489.3690	2405
0Safe_safe_UNA2_210490.3691	2283
0Safe_safe_UNA2_210500.3701	3289
0Safe_safe_UNA2_210512.3713	2948
0Safe_safe_UNA2_210521.3722	2443
0Safe_safe_UNA2_210527.3728	2103
0Safe_safe_UNA2_210538.3739	2096
0Safe_safe_UNA2_210547.3748	1495
0Safe_safe_UNA3_210560.6011	1401
0Safe_safe_UNA3_210582.6033	1987
0Safe_safe_UNA3_210586.6037	1749
0Safe_safe_UNA3_210593.6044	2582
0Safe_safe_UNA3_210599.6050	2680
0Safe_safe_UNA3_210601.6052	1920
0Safe_safe_UNA3_210606.6057	1903
0Safe_safe_UNA3_210607.6058	2303
0Safe_safe_UNA3_210612.6063	4038
0Safe_safe_UNA3_210622.6073	1979
0Safe_safe_UNA3_210628.6079	1503
0Safe_safe_UNA3_210633.6084	2859
0Safe_safe_UNA3_210634.6085	1735
0Safe_safe_UNA3_210643.6094	752
0Safe_safe_UNA3_210644.6095	481
0Safe_safe_UNA3_210648.6099	2031
0Safe_safe_UNA3_210676.6127	2765
0Safe_safe_UNA3_210679.6130	2198
0Safe_safe_UNA3_210709.6160	3143
0Safe_safe_UNA3_210711.6162	2711
0Safe_safe_UNA3_210714.6165	2410
0Safe_safe_UNA3_210717.6168	1875
0Safe_safe_UNA3_210719.6170	2370
0Safe_safe_UNA3_210721.6172	2824
0Safe_safe_UNA3_210723.6174	2389
0Safe_safe_UNA3_210725.6176	2158
0Safe_safe_UNA3_210728.6179	1915
0Safe_safe_UNA3_210733.6184	2023
0Safe_safe_UNA3_210737.6188	1906
0Safe_safe_UNA3_210738.6189	2070
0Safe_safe_UNA3_210739.6190	2823
0Safe_safe_UNA3_210753.6204	3089
0Safe_safe_UNA3_210756.6207	2649
0Safe_safe_UNA3_210758.6209	1624
0Safe_safe_UNA3_210759.6210	2951
0Safe_safe_UNA3_210760.6211	2500
0Safe_safe_UNA3_210768.6219	2460
0Safe_safe_UNA3_210772.6223	1434
0Safe_safe_UNA3_210780.6231	1807
0Safe_safe_UNA3_210781.6232	1427
0Safe_safe_UNA3_210785.6236	2704
0Safe_safe_UNA3_210792.6243	1902
0Safe_safe_UNA3_210794.6245	1815
0Safe_safe_UNA3_210797.6248	2114
0Safe_safe_UNA3_210799.6250	1930
0Safe_safe_UNA3_210800.6251	1830
0Safe_safe_UNA3_210804.6255	1737
0Safe_safe_UNA3_210807.6258	1861
0Safe_safe_UNA3_210808.6259	1355
0Safe_safe_UNA3_210813.6264	1887
0Safe_safe_UNA3_210814.6265	2097
0Safe_safe_UNA3_210819.6270	2037
0Safe_safe_UNA3_210825.6276	1406
0Safe_safe_UNA3_210840.6291	1021
0Safe_safe_UNA3_210845.6296	2532
0Safe_safe_UNA3_210850.6301	2062
0Safe_safe_UNA3_210861.6312	2721
0Safe_safe_UNA3_210867.6318	2922
0Safe_safe_UNA3_210880.6331	1626
0Safe_safe_UNA3_210882.6333	2043
0Safe_safe_UNA3_210889.6340	2771
0Safe_safe_UNA3_210913.6364	1564
0Safe_safe_UNA3_210915.6366	3542
0Safe_safe_UNA3_210936.6387	2123
0Safe_safe_UNA3_210939.6390	2208
0Safe_safe_UNA3_210944.6395	1820
0Safe_safe_UNA3_210947.6398	2429
0Safe_safe_UNA3_210949.6400	570
0Safe_safe_UNA3_210951.6402	2468
0Safe_safe_UNA3_210963.6414	2095
0Safe_safe_UNA3_210969.6420	1597
0Safe_safe_UNA3_210978.6429	2408
0Safe_safe_UNA3_210989.6440	1835
0Safe_safe_UNA3_210995.6446	1546
0Safe_safe_UNA3_211003.6454	791
0Safe_safe_UNA3_211009.6460	1053
0Safe_safe_UNA3_211011.6462	1713
0Safe_safe_UNA3_211017.6468	4832
0Safe_safe_UNA3_211022.6473	4903
0Safe_safe_UNA3_211027.6478	1975
0Safe_safe_UNA3_211034.6485	1382
0Safe_safe_UNA3_211037.6488	4166
0Safe_safe_UNA3_211051.6502	2661
0Safe_safe_UNA3_211057.6508	3457
0Safe_safe_UNA3_211063.6514	2641
0Safe_safe_UNA3_211077.6528	2714
0Safe_safe_UNA3_211078.6529	939
0Safe_safe_UNA3_211082.6533	3248
0Safe_safe_UNA3_211086.6537	2964
0Safe_safe_UNA3_211091.6542	3307
0Safe_safe_UNA3_211093.6544	2159
0Safe_safe_UNA3_211100.6551	2358
0Safe_safe_UNA3_211107.6558	2067
0Safe_safe_UNA3_211123.6574	2400
0Safe_safe_UNA3_211129.6580	2836
0Safe_safe_UNA3_211142.6593	2429
0Safe_safe_UNA3_211144.6595	1962
0Safe_safe_UNA3_211149.6600	3211
0Safe_safe_UNA3_211150.6601	1993
0Safe_safe_UNA3_211165.6616	1302
0Safe_safe_UNA3_211166.6617	2817
0Safe_safe_UNA3_211172.6623	1207
0Safe_safe_UNA3_211175.6626	3167
0Safe_safe_UNA3_211183.6634	2133
0Safe_safe_UNA3_211184.6635	2181
0Safe_safe_UNA3_211186.6637	1657
0Safe_safe_UNA3_211187.6638	1481
0Safe_safe_UNA3_211188.6639	2554
0Safe_safe_UNA3_211197.6648	1081
0Safe_safe_UNA3_211204.6655	2279
0Safe_safe_UNA3_211217.6668	2089
0Safe_safe_UNA3_211223.6674	1683
0Safe_safe_UNA3_211230.6681	2276
0Safe_safe_UNA3_211231.6682	1561
0Safe_safe_UNA3_211232.6683	4337
0Safe_safe_UNA3_211233.6684	3182
0Safe_safe_UNA3_211242.6693	1770
0Safe_safe_UNA3_211266.6717	2691
0Safe_safe_UNA3_211270.6721	2637
0Safe_safe_UNA3_211271.6722	1386
0Safe_safe_UNA3_211272.6723	2363
0Safe_safe_UNA3_211278.6729	2297
0Safe_safe_UNA3_211290.6741	2306
ABCB11_P1P2_crispri_491	2515
ABCB11_P1P2_crispri_492	2256
ABCB11_P1P2_crispri_493	1753
[truncated: 2,867 more rows]

## Sheet: Ricin plus Retro-2 rep 2
0NONE_na_crispri_205283	2128
0NONE_na_crispri_205288	721
0NONE_na_crispri_205289	1134
0NONE_na_crispri_205291	2356
0NONE_na_crispri_205292	1330
0NONE_na_crispri_205296	1626
0NONE_na_crispri_205298	1652
0NONE_na_crispri_205299	873
0NONE_na_crispri_205300	1897
0NONE_na_crispri_205301	3692
0NONE_na_crispri_205304	1530
0NONE_na_crispri_205305	1998
0NONE_na_crispri_205308	652
0NONE_na_crispri_205313	2241
0NONE_na_crispri_205320	1757
0NONE_na_crispri_205327	2040
0NONE_na_crispri_205330	2010
0NONE_na_crispri_205334	1923
0NONE_na_crispri_205335	2435
0NONE_na_crispri_205336	2542
0NONE_na_crispri_205338	1934
0NONE_na_crispri_205340	1047
0NONE_na_crispri_205347	2464
0NONE_na_crispri_205348	1817
0NONE_na_crispri_205353	1287
0NONE_na_crispri_205363	2179
0NONE_na_crispri_205364	1617
0NONE_na_crispri_205366	1788
0NONE_na_crispri_205367	1830
0NONE_na_crispri_205369	2062
0NONE_na_crispri_205372	2429
0NONE_na_crispri_205375	1739
0NONE_na_crispri_205376	1031
0NONE_na_crispri_205393	2667
0NONE_na_crispri_205395	2088
0NONE_na_crispri_205399	1920
0NONE_na_crispri_205401	1685
0NONE_na_crispri_205403	2257
0NONE_na_crispri_205408	1194
0NONE_na_crispri_205415	1964
0NONE_na_crispri_205418	1981
0NONE_na_crispri_205420	1191
0NONE_na_crispri_205425	3002
0NONE_na_crispri_205427	1866
0NONE_na_crispri_205436	1756
0NONE_na_crispri_205439	1602
0NONE_na_crispri_205442	1849
0NONE_na_crispri_205446	928
0NONE_na_crispri_205449	2425
0NONE_na_crispri_205450	684
0NONE_na_crispri_205451	2284
0NONE_na_crispri_205452	1730
0NONE_na_crispri_205458	1699
0NONE_na_crispri_205459	2102
0NONE_na_crispri_205460	2739
0NONE_na_crispri_205463	2435
0NONE_na_crispri_205469	2759
0NONE_na_crispri_205474	364
0NONE_na_crispri_205477	2510
0NONE_na_crispri_205478	1773
0NONE_na_crispri_205479	2113
0NONE_na_crispri_205481	3362
0NONE_na_crispri_205484	2005
0NONE_na_crispri_205498	2408
0NONE_na_crispri_205499	1787
0NONE_na_crispri_205512	1797
0NONE_na_crispri_205513	2382
0NONE_na_crispri_205514	1154
0NONE_na_crispri_205524	1719
0NONE_na_crispri_205526	1823
0NONE_na_crispri_205530	842
0NONE_na_crispri_205537	1111
0NONE_na_crispri_205540	597
0NONE_na_crispri_205546	7
0NONE_na_crispri_205562	859
0NONE_na_crispri_205563	2382
0NONE_na_crispri_205565	2309
0NONE_na_crispri_205566	1521
0NONE_na_crispri_205569	1471
0NONE_na_crispri_205576	2578
0NONE_na_crispri_205588	1402
0NONE_na_crispri_205596	2266
0NONE_na_crispri_205605	3241
0NONE_na_crispri_205606	2580
0NONE_na_crispri_205615	3714
0NONE_na_crispri_205619	2793
0NONE_na_crispri_205624	587
0NONE_na_crispri_205635	1360
0NONE_na_crispri_205639	1530
0NONE_na_crispri_205640	1628
0NONE_na_crispri_205647	2669
0NONE_na_crispri_205648	1117
0NONE_na_crispri_205652	1381
0NONE_na_crispri_205654	2193
0NONE_na_crispri_205667	1134
0NONE_na_crispri_205669	2904
0NONE_na_crispri_205670	2175
0NONE_na_crispri_205672	1157
0NONE_na_crispri_205689	2204
0NONE_na_crispri_205690	2167
0NONE_na_crispri_205691	1213
0NONE_na_crispri_205692	1455
0NONE_na_crispri_205695	3028
0NONE_na_crispri_205698	3923
0NONE_na_crispri_205702	1979
0NONE_na_crispri_205704	1509
0NONE_na_crispri_205706	3335
0NONE_na_crispri_205708	2904
0NONE_na_crispri_205709	1593
0NONE_na_crispri_205717	2510
0NONE_na_crispri_205718	1948
0NONE_na_crispri_205723	1503
0NONE_na_crispri_205734	856
0NONE_na_crispri_205736	1437
0NONE_na_crispri_205739	1177
0NONE_na_crispri_205743	1835
0NONE_na_crispri_205746	2696
0NONE_na_crispri_205749	2555
0NONE_na_crispri_205750	2214
0NONE_na_crispri_205751	773
0NONE_na_crispri_205759	851
0NONE_na_crispri_205764	889
0NONE_na_crispri_205765	1215
0NONE_na_crispri_205769	1956
0NONE_na_crispri_205778	2537
0NONE_na_crispri_205783	1427
0NONE_na_crispri_205784	1588
0NONE_na_crispri_205786	1134
0NONE_na_crispri_205787	1658
0NONE_na_crispri_205789	1859
0NONE_na_crispri_205790	3390
0NONE_na_crispri_205806	1545
0NONE_na_crispri_205807	2370
0NONE_na_crispri_205812	4114
0NONE_na_crispri_205813	1431
0NONE_na_crispri_205814	1025
0NONE_na_crispri_205823	2875
0NONE_na_crispri_205825	2086
0NONE_na_crispri_205827	1653
0NONE_na_crispri_205828	2229
0NONE_na_crispri_205829	2703
0NONE_na_crispri_205830	1013
0NONE_na_crispri_205833	1947
0NONE_na_crispri_205840	1150
0NONE_na_crispri_205842	1980
0NONE_na_crispri_205845	2007
0NONE_na_crispri_205855	2145
0NONE_na_crispri_205856	1418
0NONE_na_crispri_205865	1262
0NONE_na_crispri_205866	2417
0NONE_na_crispri_205868	2231
0NONE_na_crispri_205874	967
0NONE_na_crispri_205875	2846
0NONE_na_crispri_205881	1457
0NONE_na_crispri_205894	2568
0NONE_na_crispri_205897	2511
0NONE_na_crispri_205901	2650
0NONE_na_crispri_205903	2996
0NONE_na_crispri_205906	1407
0NONE_na_crispri_205907	3234
0NONE_na_crispri_205908	1958
0NONE_na_crispri_205909	987
0NONE_na_crispri_205911	869
0NONE_na_crispri_205917	2511
0NONE_na_crispri_205927	1179
0NONE_na_crispri_205933	2283
0NONE_na_crispri_205934	2967
0NONE_na_crispri_205937	1738
0NONE_na_crispri_205947	1853
0NONE_na_crispri_205949	1443
0NONE_na_crispri_205951	1620
0NONE_na_crispri_205955	1903
0NONE_na_crispri_205956	3028
0NONE_na_crispri_205959	1549
0NONE_na_crispri_205961	1676
0NONE_na_crispri_205966	2999
0NONE_na_crispri_205973	138
0NONE_na_crispri_205975	1337
0NONE_na_crispri_205981	2799
0NONE_na_crispri_205984	2445
0NONE_na_crispri_205985	2320
0NONE_na_crispri_205989	1901
0NONE_na_crispri_205990	1949
0NONE_na_crispri_205992	2086
0NONE_na_crispri_205993	1397
0NONE_na_crispri_205994	3276
0NONE_na_crispri_206004	2097
0NONE_na_crispri_206010	1584
0NONE_na_crispri_206014	1816
0NONE_na_crispri_206022	1978
0NONE_na_crispri_206024	2375
0NONE_na_crispri_206027	2547
0NONE_na_crispri_206030	1205
0NONE_na_crispri_206032	1345
0NONE_na_crispri_206037	1989
0NONE_na_crispri_206039	2930
0NONE_na_crispri_206040	2239
0NONE_na_crispri_206047	1436
0NONE_na_crispri_206051	2594
0NONE_na_crispri_206054	1081
0NONE_na_crispri_206056	1264
0NONE_na_crispri_206062	1929
0NONE_na_crispri_206066	1608
0NONE_na_crispri_206077	1654
0NONE_na_crispri_206079	151
0NONE_na_crispri_206086	1353
0NONE_na_crispri_206092	1096
0NONE_na_crispri_206100	1562
0NONE_na_crispri_206101	3124
0NONE_na_crispri_206104	1820
0NONE_na_crispri_206106	1694
0NONE_na_crispri_206107	1585
0NONE_na_crispri_206110	2783
0NONE_na_crispri_206113	1986
0NONE_na_crispri_206114	1061
0NONE_na_crispri_206117	1778
0NONE_na_crispri_206119	1327
0NONE_na_crispri_206123	34
0NONE_na_crispri_206124	2168
0NONE_na_crispri_206128	1259
0NONE_na_crispri_206137	1320
0NONE_na_crispri_206139	3313
0NONE_na_crispri_206148	2325
0NONE_na_crispri_206149	714
0NONE_na_crispri_206158	2008
0NONE_na_crispri_206166	1978
0NONE_na_crispri_206167	2791
0NONE_na_crispri_206170	1336
0NONE_na_crispri_206173	2495
0NONE_na_crispri_206175	2313
0NONE_na_crispri_206177	1347
0NONE_na_crispri_206180	1638
0NONE_na_crispri_206188	1886
0NONE_na_crispri_206189	1419
0NONE_na_crispri_206190	1967
0NONE_na_crispri_206191	2889
0NONE_na_crispri_206193	4179
0NONE_na_crispri_206199	1529
0NONE_na_crispri_206212	1783
0NONE_na_crispri_206218	1560
0NONE_na_crispri_206219	679
0NONE_na_crispri_206220	3153
0NONE_na_crispri_206231	1236
0NONE_na_crispri_206233	2731
0NONE_na_crispri_206244	1097
0NONE_na_crispri_206245	2253
0NONE_na_crispri_206246	1495
0NONE_na_crispri_206251	1474
0NONE_na_crispri_206252	3007
0NONE_na_crispri_206253	1691
0NONE_na_crispri_206259	1611
0NONE_na_crispri_206262	2405
0NONE_na_crispri_206263	2791
0NONE_na_crispri_206264	2531
0NONE_na_crispri_206274	1696
0NONE_na_crispri_206276	1528
0NONE_na_crispri_206281	2194
0NONE_na_crispri_206284	2787
0NONE_na_crispri_206285	1741
0NONE_na_crispri_206291	1391
0NONE_na_crispri_206292	2302
0NONE_na_crispri_206293	1966
0NONE_na_crispri_206294	2341
0NONE_na_crispri_206296	3112
0NONE_na_crispri_206298	2476
0NONE_na_crispri_206307	1948
0NONE_na_crispri_206310	1980
0NONE_na_crispri_206312	1394
0NONE_na_crispri_206317	2066
0NONE_na_crispri_206319	3006
0NONE_na_crispri_206321	2610
0NONE_na_crispri_206324	2465
0NONE_na_crispri_206331	1815
0NONE_na_crispri_206332	1401
0NONE_na_crispri_206335	2169
0NONE_na_crispri_206336	1111
0NONE_na_crispri_206338	2747
0NONE_na_crispri_206345	1491
0NONE_na_crispri_206346	1839
0NONE_na_crispri_206347	1501
0NONE_na_crispri_206351	2064
0NONE_na_crispri_206353	1917
0NONE_na_crispri_206355	2934
0NONE_na_crispri_206358	2194
0NONE_na_crispri_206361	2798
0NONE_na_crispri_206364	2928
0NONE_na_crispri_206369	905
0NONE_na_crispri_206370	3129
0NONE_na_crispri_206371	1861
0NONE_na_crispri_206373	2628
0NONE_na_crispri_206374	2459
0NONE_na_crispri_206378	888
0NONE_na_crispri_206379	2265
0NONE_na_crispri_206383	3069
0NONE_na_crispri_206388	2320
0NONE_na_crispri_206390	2752
0NONE_na_crispri_206392	2006
0NONE_na_crispri_206397	95
0NONE_na_crispri_206398	2330
0NONE_na_crispri_206412	1386
0NONE_na_crispri_206417	2118
0NONE_na_crispri_206425	1841
0NONE_na_crispri_206436	2559
0NONE_na_crispri_206438	2210
0NONE_na_crispri_206439	2175
0NONE_na_crispri_206443	1877
0NONE_na_crispri_206444	1818
0NONE_na_crispri_206449	2409
0NONE_na_crispri_206453	1676
0NONE_na_crispri_206454	2613
0NONE_na_crispri_206457	1899
0NONE_na_crispri_206459	1745
0NONE_na_crispri_206460	2298
0NONE_na_crispri_206462	1577
0NONE_na_crispri_206463	986
0NONE_na_crispri_206465	1745
0NONE_na_crispri_206466	2644
0NONE_na_crispri_206475	2858
0NONE_na_crispri_206480	1759
0NONE_na_crispri_206481	2575
0NONE_na_crispri_206484	1253
0NONE_na_crispri_206485	2354
0NONE_na_crispri_206486	2842
0NONE_na_crispri_206493	2111
0NONE_na_crispri_206496	2089
0NONE_na_crispri_206500	1648
0NONE_na_crispri_206505	1045
0NONE_na_crispri_206506	611
0NONE_na_crispri_206507	2826
0NONE_na_crispri_206514	1552
0NONE_na_crispri_206517	2687
0NONE_na_crispri_206520	818
0NONE_na_crispri_206524	2370
0NONE_na_crispri_206530	1601
0NONE_na_crispri_206534	2430
0NONE_na_crispri_206537	2145
0NONE_na_crispri_206542	1758
0NONE_na_crispri_206549	1968
0NONE_na_crispri_206555	1496
0NONE_na_crispri_206556	2201
0NONE_na_crispri_206558	1740
0NONE_na_crispri_206560	1567
0NONE_na_crispri_206562	3668
0NONE_na_crispri_206567	1894
0NONE_na_crispri_206573	1701
0NONE_na_crispri_206575	1364
0NONE_na_crispri_206579	2496
0NONE_na_crispri_206583	1291
0NONE_na_crispri_206584	2025
0NONE_na_crispri_206585	3418
0NONE_na_crispri_206592	1890
0NONE_na_crispri_206597	1926
0NONE_na_crispri_206598	2490
0NONE_na_crispri_206607	3216
0NONE_na_crispri_206611	94
0NONE_na_crispri_206613	1401
0NONE_na_crispri_206622	1704
0NONE_na_crispri_206625	1992
0NONE_na_crispri_206633	1072
0NONE_na_crispri_206634	2534
0NONE_na_crispri_206639	3218
0NONE_na_crispri_206642	1101
0NONE_na_crispri_206647	1975
0NONE_na_crispri_206652	1775
0NONE_na_crispri_206657	1844
0NONE_na_crispri_206659	1142
0NONE_na_crispri_206667	1760
0NONE_na_crispri_206670	2453
0NONE_na_crispri_206675	1934
0NONE_na_crispri_206681	2156
0NONE_na_crispri_206683	1485
0NONE_na_crispri_206694	1132
0NONE_na_crispri_206695	2702
0NONE_na_crispri_206697	1404
0NONE_na_crispri_206699	755
0NONE_na_crispri_206701	1747
0NONE_na_crispri_206702	1344
0NONE_na_crispri_206704	1421
0NONE_na_crispri_206709	1496
0NONE_na_crispri_206710	797
0NONE_na_crispri_206723	1711
0NONE_na_crispri_206728	1283
0NONE_na_crispri_206729	1701
0NONE_na_crispri_206730	1590
0NONE_na_crispri_206741	2251
0NONE_na_crispri_206754	1842
0NONE_na_crispri_206756	478
0NONE_na_crispri_206757	1271
0NONE_na_crispri_206760	2152
0NONE_na_crispri_206764	1201
0NONE_na_crispri_206765	2705
0NONE_na_crispri_206766	2113
0NONE_na_crispri_206767	1521
0NONE_na_crispri_206773	1574
0NONE_na_crispri_206774	1368
0NONE_na_crispri_206777	2393
0NONE_na_crispri_206778	1368
0NONE_na_crispri_206781	1802
0NONE_na_crispri_206782	146
0NONE_na_crispri_206784	1287
0NONE_na_crispri_206787	773
0NONE_na_crispri_206806	2057
0NONE_na_crispri_206809	2372
0NONE_na_crispri_206812	1875
0NONE_na_crispri_206815	1765
0NONE_na_crispri_206821	2492
0NONE_na_crispri_206822	2631
0NONE_na_crispri_206823	1914
0NONE_na_crispri_206824	3503
0NONE_na_crispri_206825	1231
0NONE_na_crispri_206826	701
0NONE_na_crispri_206829	2570
0NONE_na_crispri_206831	1880
0NONE_na_crispri_206834	2246
0NONE_na_crispri_206840	2545
0NONE_na_crispri_206844	2396
0NONE_na_crispri_206848	1931
0NONE_na_crispri_206852	1570
0NONE_na_crispri_206854	3442
0NONE_na_crispri_206856	2065
0NONE_na_crispri_206860	1856
0NONE_na_crispri_206861	2616
0NONE_na_crispri_206862	2307
0NONE_na_crispri_206865	2622
0NONE_na_crispri_206866	1873
0NONE_na_crispri_206869	1264
0NONE_na_crispri_206872	3179
0NONE_na_crispri_206878	1070
0NONE_na_crispri_206879	1912
0NONE_na_crispri_206882	3609
0NONE_na_crispri_206885	1977
0NONE_na_crispri_206897	2169
0NONE_na_crispri_206903	2649
0NONE_na_crispri_206904	1913
0NONE_na_crispri_206906	1405
0NONE_na_crispri_206909	1590
0NONE_na_crispri_206910	2893
0NONE_na_crispri_206914	2417
0NONE_na_crispri_206917	702
0NONE_na_crispri_206919	1654
0NONE_na_crispri_206920	2444
0NONE_na_crispri_206923	1804
0NONE_na_crispri_206926	779
0NONE_na_crispri_206929	854
0NONE_na_crispri_206933	1176
0NONE_na_crispri_206935	834
0NONE_na_crispri_206936	1782
0NONE_na_crispri_206938	1746
0NONE_na_crispri_206945	2107
0NONE_na_crispri_206946	3261
0NONE_na_crispri_206947	1718
0NONE_na_crispri_206949	3409
0NONE_na_crispri_206954	3324
0NONE_na_crispri_206956	1572
0NONE_na_crispri_206958	2409
0NONE_na_crispri_206962	2390
0NONE_na_crispri_206963	1873
0NONE_na_crispri_206965	1756
0NONE_na_crispri_206972	2243
0NONE_na_crispri_206976	1994
0NONE_na_crispri_206985	1876
0NONE_na_crispri_206991	1340
0NONE_na_crispri_206992	4201
0NONE_na_crispri_206993	1354
0NONE_na_crispri_207005	1378
0NONE_na_crispri_207007	1663
0NONE_na_crispri_207008	1832
0NONE_na_crispri_207016	3975
0NONE_na_crispri_207019	1780
0NONE_na_crispri_207021	1809
0NONE_na_crispri_207022	2129
0NONE_na_crispri_207029	920
0NONE_na_crispri_207043	1984
0NONE_na_crispri_207044	3899
0NONE_na_crispri_207053	1753
0NONE_na_crispri_207059	812
0NONE_na_crispri_207063	2527
0NONE_na_crispri_207069	2289
0NONE_na_crispri_207070	1730
0NONE_na_crispri_207074	2719
0NONE_na_crispri_207080	1429
0NONE_na_crispri_207084	1299
0NONE_na_crispri_207090	1866
0NONE_na_crispri_207103	2330
0NONE_na_crispri_207108	1941
0NONE_na_crispri_207110	1875
0NONE_na_crispri_207118	1448
0NONE_na_crispri_207119	2791
0NONE_na_crispri_207126	1645
0NONE_na_crispri_207128	1148
0NONE_na_crispri_207131	1542
0NONE_na_crispri_207132	1800
0NONE_na_crispri_207140	2219
0NONE_na_crispri_207141	1498
0NONE_na_crispri_207144	1693
0NONE_na_crispri_207147	1482
0NONE_na_crispri_207149	1951
0NONE_na_crispri_207154	672
0NONE_na_crispri_207158	2298
0NONE_na_crispri_207160	1346
0NONE_na_crispri_207162	2710
0NONE_na_crispri_207163	1858
0NONE_na_crispri_207173	2186
0NONE_na_crispri_207183	2228
0NONE_na_crispri_207185	2781
0NONE_na_crispri_207186	1436
0NONE_na_crispri_207187	1669
0NONE_na_crispri_207192	2731
0NONE_na_crispri_207196	1439
0NONE_na_crispri_207200	1539
0NONE_na_crispri_207203	1914
0NONE_na_crispri_207204	896
0NONE_na_crispri_207206	2540
0NONE_na_crispri_207208	2122
0NONE_na_crispri_207211	2774
0NONE_na_crispri_207212	1468
0NONE_na_crispri_207213	1741
0NONE_na_crispri_207214	1402
0NONE_na_crispri_207215	964
0NONE_na_crispri_207216	1437
0NONE_na_crispri_207218	1275
0NONE_na_crispri_207219	2877
0NONE_na_crispri_207222	1060
0NONE_na_crispri_207224	1496
0NONE_na_crispri_207225	2262
0NONE_na_crispri_207226	1186
0NONE_na_crispri_207228	781
0NONE_na_crispri_207230	1546
0NONE_na_crispri_207239	1665
0NONE_na_crispri_207245	2042
0NONE_na_crispri_207257	1851
0NONE_na_crispri_207271	1725
0NONE_na_crispri_207272	2078
0NONE_na_crispri_207273	2567
0NONE_na_crispri_207274	586
0NONE_na_crispri_207282	2214
0NONE_na_crispri_207289	1237
0NONE_na_crispri_207297	2704
0NONE_na_crispri_207300	2175
0NONE_na_crispri_207302	1151
0NONE_na_crispri_207305	1627
0NONE_na_crispri_207318	3259
0NONE_na_crispri_207319	751
0NONE_na_crispri_207330	1165
0NONE_na_crispri_207334	3098
0NONE_na_crispri_207338	1123
0NONE_na_crispri_207339	1475
0NONE_na_crispri_207348	1456
0NONE_na_crispri_207351	1834
0NONE_na_crispri_207354	1168
0NONE_na_crispri_207355	2566
0NONE_na_crispri_207356	1190
0NONE_na_crispri_207363	1117
0NONE_na_crispri_207366	2038
0NONE_na_crispri_207370	1719
0NONE_na_crispri_207371	1181
0NONE_na_crispri_207372	2353
0NONE_na_crispri_207373	1937
0NONE_na_crispri_207375	2293
0NONE_na_crispri_207389	2608
0NONE_na_crispri_207390	2206
0NONE_na_crispri_207394	2784
0NONE_na_crispri_207395	3306
0NONE_na_crispri_207400	1872
0NONE_na_crispri_207406	2399
0NONE_na_crispri_207408	1859
0NONE_na_crispri_207413	2331
0NONE_na_crispri_207427	1661
0NONE_na_crispri_207428	1654
0NONE_na_crispri_207431	1745
0NONE_na_crispri_207432	1121
0NONE_na_crispri_207434	2047
0NONE_na_crispri_207435	2529
0NONE_na_crispri_207437	1826
0NONE_na_crispri_207444	1440
0NONE_na_crispri_207450	3445
0NONE_na_crispri_207452	1113
0NONE_na_crispri_207457	2096
0NONE_na_crispri_207459	2265
0NONE_na_crispri_207461	2802
0NONE_na_crispri_207462	1613
0NONE_na_crispri_207468	1437
0NONE_na_crispri_207471	1700
0NONE_na_crispri_207475	1912
0NONE_na_crispri_207479	2517
0NONE_na_crispri_207482	880
0NONE_na_crispri_207483	1587
0NONE_na_crispri_207487	2098
0NONE_na_crispri_207489	2319
0NONE_na_crispri_207493	1862
0NONE_na_crispri_207494	1793
0NONE_na_crispri_207508	1281
0NONE_na_crispri_207510	1896
0NONE_na_crispri_207511	2703
0NONE_na_crispri_207512	1866
0NONE_na_crispri_207514	1822
0NONE_na_crispri_207516	696
0NONE_na_crispri_207522	642
0NONE_na_crispri_207534	1250
0NONE_na_crispri_207542	2518
0NONE_na_crispri_207553	972
0NONE_na_crispri_207555	2247
0NONE_na_crispri_207560	2286
0NONE_na_crispri_207566	2431
0NONE_na_crispri_207570	2522
0NONE_na_crispri_207571	2760
0NONE_na_crispri_207576	2215
0NONE_na_crispri_207582	2284
0NONE_na_crispri_207589	1055
0NONE_na_crispri_207590	1097
0NONE_na_crispri_207597	1852
0NONE_na_crispri_207599	1265
0NONE_na_crispri_207602	2723
0NONE_na_crispri_207608	1077
0NONE_na_crispri_207613	1624
0NONE_na_crispri_207614	2307
0NONE_na_crispri_207615	1968
0NONE_na_crispri_207617	1690
0NONE_na_crispri_207618	1051
0NONE_na_crispri_207627	3810
0NONE_na_crispri_207631	1928
0NONE_na_crispri_207632	2113
0NONE_na_crispri_207636	2175
0NONE_na_crispri_207637	1507
0NONE_na_crispri_207639	1638
0NONE_na_crispri_207640	1278
0NONE_na_crispri_207641	558
0NONE_na_crispri_207642	1861
0NONE_na_crispri_207643	2012
0NONE_na_crispri_207644	2326
0NONE_na_crispri_207646	1476
0NONE_na_crispri_207647	3580
0NONE_na_crispri_207649	1123
0NONE_na_crispri_207655	2060
0NONE_na_crispri_207658	1553
0NONE_na_crispri_207660	1321
0NONE_na_crispri_207662	1744
0NONE_na_crispri_207669	2350
0NONE_na_crispri_207672	2634
0NONE_na_crispri_207673	1939
0NONE_na_crispri_207679	476
0NONE_na_crispri_207684	2554
0NONE_na_crispri_207694	1460
0NONE_na_crispri_207696	1528
0NONE_na_crispri_207704	2332
0NONE_na_crispri_207709	2086
0NONE_na_crispri_207710	1812
0NONE_na_crispri_207711	2268
0NONE_na_crispri_207721	252
0NONE_na_crispri_207728	1549
0NONE_na_crispri_207740	1806
0NONE_na_crispri_207743	2447
0NONE_na_crispri_207744	529
0NONE_na_crispri_207747	1743
0NONE_na_crispri_207753	661
0NONE_na_crispri_207757	2270
0NONE_na_crispri_207771	913
0NONE_na_crispri_207774	229
0NONE_na_crispri_207777	1840
0NONE_na_crispri_207778	1456
0NONE_na_crispri_207780	1989
0NONE_na_crispri_207786	2697
0NONE_na_crispri_207788	3329
0NONE_na_crispri_207789	2047
0NONE_na_crispri_207793	1516
0NONE_na_crispri_207800	2323
0NONE_na_crispri_207803	804
0NONE_na_crispri_207804	2441
0NONE_na_crispri_207805	1910
0NONE_na_crispri_207809	877
0NONE_na_crispri_207813	1596
0NONE_na_crispri_207814	2742
0NONE_na_crispri_207817	2289
0NONE_na_crispri_207819	1286
0NONE_na_crispri_207820	1014
0NONE_na_crispri_207821	1724
0NONE_na_crispri_207824	1080
0NONE_na_crispri_207830	2407
0NONE_na_crispri_207833	1628
0NONE_na_crispri_207834	2179
0NONE_na_crispri_207837	1280
0NONE_na_crispri_207838	1600
0NONE_na_crispri_207839	1589
0NONE_na_crispri_207843	1153
0NONE_na_crispri_207844	2624
0NONE_na_crispri_207845	1726
0NONE_na_crispri_207852	1839
0NONE_na_crispri_207853	199
0NONE_na_crispri_207857	2146
0NONE_na_crispri_207859	1098
0NONE_na_crispri_207870	2242
0NONE_na_crispri_207874	1877
0NONE_na_crispri_207875	1086
0NONE_na_crispri_207876	2192
0NONE_na_crispri_207878	1655
0NONE_na_crispri_207882	2605
0NONE_na_crispri_207889	2438
0NONE_na_crispri_207891	1504
0NONE_na_crispri_207893	2383
0NONE_na_crispri_207897	2385
0NONE_na_crispri_207900	1245
0NONE_na_crispri_207902	837
0NONE_na_crispri_207909	1883
0NONE_na_crispri_207912	3480
0NONE_na_crispri_207913	1216
0NONE_na_crispri_207914	1852
0NONE_na_crispri_207915	2930
0NONE_na_crispri_207916	391
0NONE_na_crispri_207917	1403
0NONE_na_crispri_207918	2101
0NONE_na_crispri_207928	1924
0NONE_na_crispri_207931	2991
0NONE_na_crispri_207937	2032
0NONE_na_crispri_207942	1705
0NONE_na_crispri_207944	2151
0NONE_na_crispri_207945	2240
0NONE_na_crispri_207946	1308
0NONE_na_crispri_207948	1820
0NONE_na_crispri_207952	1301
0NONE_na_crispri_207956	1105
0NONE_na_crispri_207958	1710
0NONE_na_crispri_207960	1764
0NONE_na_crispri_207961	2375
0NONE_na_crispri_207971	2117
0NONE_na_crispri_207975	1999
0NONE_na_crispri_207977	3141
0NONE_na_crispri_207978	2040
0NONE_na_crispri_207982	1170
0NONE_na_crispri_207985	2770
0NONE_na_crispri_207991	2615
0NONE_na_crispri_207995	1254
0NONE_na_crispri_208000	1600
0NONE_na_crispri_208003	4001
0NONE_na_crispri_208004	1383
0NONE_na_crispri_208011	1950
0NONE_na_crispri_208016	993
0NONE_na_crispri_208018	1645
0NONE_na_crispri_208019	3454
0NONE_na_crispri_208020	1951
0NONE_na_crispri_208027	2298
0NONE_na_crispri_208030	1589
0NONE_na_crispri_208040	1962
0NONE_na_crispri_208042	3384
0NONE_na_crispri_208044	2093
0NONE_na_crispri_208045	1274
0NONE_na_crispri_208046	3311
0NONE_na_crispri_208047	2356
0NONE_na_crispri_208050	1631
0NONE_na_crispri_208059	1950
0NONE_na_crispri_208060	1066
0NONE_na_crispri_208063	1378
0NONE_na_crispri_208068	581
0NONE_na_crispri_208069	1547
0NONE_na_crispri_208071	1453
0NONE_na_crispri_208072	2445
0NONE_na_crispri_208081	2861
0NONE_na_crispri_208082	1266
0NONE_na_crispri_208083	3099
0NONE_na_crispri_208085	3129
0NONE_na_crispri_208087	2316
0NONE_na_crispri_208091	3178
0NONE_na_crispri_208092	3452
0NONE_na_crispri_208093	259
0NONE_na_crispri_208103	1748
0NONE_na_crispri_208104	9
0NONE_na_crispri_208107	1766
0NONE_na_crispri_208110	2620
0NONE_na_crispri_208118	2304
0NONE_na_crispri_208120	1468
0NONE_na_crispri_208123	1430
0NONE_na_crispri_208127	1773
0NONE_na_crispri_208131	1242
0NONE_na_crispri_208135	1643
0NONE_na_crispri_208138	1705
0NONE_na_crispri_208139	2724
0NONE_na_crispri_208140	1574
0NONE_na_crispri_208142	1366
0NONE_na_crispri_208174	1271
0NONE_na_crispri_208175	2219
0NONE_na_crispri_208177	1348
0NONE_na_crispri_208180	1262
0NONE_na_crispri_208181	2272
0NONE_na_crispri_208184	1544
0NONE_na_crispri_208186	1988
0NONE_na_crispri_208191	1646
0NONE_na_crispri_208198	1345
0NONE_na_crispri_208202	2525
0NONE_na_crispri_208206	670
0NONE_na_crispri_208212	1424
0NONE_na_crispri_208219	1873
0NONE_na_crispri_208224	1866
0NONE_na_crispri_208229	3900
0NONE_na_crispri_208236	1235
0NONE_na_crispri_208237	1511
0NONE_na_crispri_208241	1954
0NONE_na_crispri_208255	2406
0NONE_na_crispri_208259	1714
0NONE_na_crispri_208261	3999
0NONE_na_crispri_208265	2080
0NONE_na_crispri_208267	1793
0NONE_na_crispri_208277	3103
0NONE_na_crispri_208278	2521
0NONE_na_crispri_208279	194
0NONE_na_crispri_208290	3052
0NONE_na_crispri_208294	1807
0NONE_na_crispri_208296	2054
0NONE_na_crispri_208297	2662
0NONE_na_crispri_208301	1414
0NONE_na_crispri_208308	1862
0NONE_na_crispri_208310	1734
0NONE_na_crispri_208313	2152
0NONE_na_crispri_208321	2124
0NONE_na_crispri_208330	1302
0NONE_na_crispri_208331	3635
0NONE_na_crispri_208336	1935
0NONE_na_crispri_208339	1709
0NONE_na_crispri_208342	857
0NONE_na_crispri_208343	1909
0NONE_na_crispri_208345	3808
0NONE_na_crispri_208351	1379
0NONE_na_crispri_208371	1876
0NONE_na_crispri_208377	2606
0NONE_na_crispri_208381	1465
0NONE_na_crispri_208383	1066
0NONE_na_crispri_208385	3548
0NONE_na_crispri_208386	1894
0NONE_na_crispri_208396	235
0NONE_na_crispri_208399	1772
0NONE_na_crispri_208403	2111
0NONE_na_crispri_208409	2182
0NONE_na_crispri_208417	2355
0NONE_na_crispri_208429	712
0NONE_na_crispri_208434	2679
0NONE_na_crispri_208440	3610
0NONE_na_crispri_208446	1986
0NONE_na_crispri_208449	2656
0NONE_na_crispri_208455	3140
0NONE_na_crispri_208457	2023
0NONE_na_crispri_208463	1755
0NONE_na_crispri_208464	2312
0NONE_na_crispri_208465	4211
0NONE_na_crispri_208471	2092
0NONE_na_crispri_208473	1470
0NONE_na_crispri_208476	1216
0NONE_na_crispri_208482	1996
0NONE_na_crispri_208485	1817
0NONE_na_crispri_208487	1934
0NONE_na_crispri_208488	1191
0NONE_na_crispri_208490	1564
0NONE_na_crispri_208492	1797
0NONE_na_crispri_208493	879
0NONE_na_crispri_208495	2071
0NONE_na_crispri_208500	1825
0NONE_na_crispri_208505	1930
0NONE_na_crispri_208514	1710
0NONE_na_crispri_208515	2083
0NONE_na_crispri_208518	991
0NONE_na_crispri_208521	1164
0NONE_na_crispri_208533	181
0NONE_na_crispri_208536	1650
0NONE_na_crispri_208543	3475
0NONE_na_crispri_208546	2199
0NONE_na_crispri_208547	2440
0NONE_na_crispri_208548	658
0NONE_na_crispri_208558	2521
0NONE_na_crispri_208559	2030
0NONE_na_crispri_208560	5673
0NONE_na_crispri_208561	1699
0NONE_na_crispri_208564	2906
0NONE_na_crispri_208565	1209
0NONE_na_crispri_208569	1770
0NONE_na_crispri_208572	1955
0NONE_na_crispri_208575	1121
0NONE_na_crispri_208578	1715
0NONE_na_crispri_208588	1706
0NONE_na_crispri_208589	2156
0NONE_na_crispri_208590	2258
0NONE_na_crispri_208608	32
0NONE_na_crispri_208610	3153
0NONE_na_crispri_208615	2296
0NONE_na_crispri_208616	1696
0NONE_na_crispri_208618	4106
0NONE_na_crispri_208619	1921
0NONE_na_crispri_208621	1907
0NONE_na_crispri_208627	1707
0NONE_na_crispri_208629	1488
0NONE_na_crispri_208633	2141
0NONE_na_crispri_208637	1251
0NONE_na_crispri_208640	3760
0NONE_na_crispri_208644	3535
0NONE_na_crispri_208646	2183
0NONE_na_crispri_208650	2603
0NONE_na_crispri_208652	1727
0NONE_na_crispri_208659	1247
0NONE_na_crispri_208660	2188
0NONE_na_crispri_208662	3185
0NONE_na_crispri_208665	2390
0NONE_na_crispri_208671	3415
0NONE_na_crispri_208678	2476
0NONE_na_crispri_208681	1650
0NONE_na_crispri_208685	2357
0NONE_na_crispri_208687	2529
0NONE_na_crispri_208689	2770
0NONE_na_crispri_208691	1176
0NONE_na_crispri_208694	141
0NONE_na_crispri_208700	2237
0NONE_na_crispri_208701	2061
0NONE_na_crispri_208702	2713
0NONE_na_crispri_208703	1195
0NONE_na_crispri_208707	2733
0NONE_na_crispri_208708	2236
0NONE_na_crispri_208715	1325
0NONE_na_crispri_208717	1885
0NONE_na_crispri_208720	2040
0NONE_na_crispri_208724	1770
0NONE_na_crispri_208734	1607
0NONE_na_crispri_208740	1625
0NONE_na_crispri_208747	1288
0NONE_na_crispri_208750	1619
0NONE_na_crispri_208753	1685
0NONE_na_crispri_208756	926
0NONE_na_crispri_208758	1604
0NONE_na_crispri_208763	1256
0NONE_na_crispri_208766	2432
0NONE_na_crispri_208776	2356
0NONE_na_crispri_208777	1814
0NONE_na_crispri_208791	811
0NONE_na_crispri_208796	2747
0NONE_na_crispri_208799	3317
0NONE_na_crispri_208803	1217
0NONE_na_crispri_208804	1934
0NONE_na_crispri_208805	2990
0NONE_na_crispri_208808	1555
0NONE_na_crispri_208810	2115
0NONE_na_crispri_208812	2626
0NONE_na_crispri_208813	1799
0NONE_na_crispri_208818	1628
0NONE_na_crispri_208819	2674
0NONE_na_crispri_208833	1052
0NONE_na_crispri_208834	1594
0NONE_na_crispri_208837	1847
0NONE_na_crispri_208839	2132
0NONE_na_crispri_208842	2655
0NONE_na_crispri_208843	1301
0NONE_na_crispri_208849	2109
0NONE_na_crispri_208850	783
0NONE_na_crispri_208852	1574
0NONE_na_crispri_208859	2045
0NONE_na_crispri_208861	1692
0NONE_na_crispri_208871	2488
0NONE_na_crispri_208874	1063
0NONE_na_crispri_208877	2422
0NONE_na_crispri_208882	1674
0NONE_na_crispri_208901	2007
0NONE_na_crispri_208902	1936
0NONE_na_crispri_208903	1356
0NONE_na_crispri_208904	2806
0NONE_na_crispri_208906	1606
0NONE_na_crispri_208907	1160
0NONE_na_crispri_208909	1603
0NONE_na_crispri_208910	1947
0NONE_na_crispri_208912	1912
0NONE_na_crispri_208914	1012
0NONE_na_crispri_208918	832
0NONE_na_crispri_208926	2785
0NONE_na_crispri_208927	3366
0NONE_na_crispri_208929	1897
0NONE_na_crispri_208931	194
0NONE_na_crispri_208934	279
0NONE_na_crispri_208936	2484
0NONE_na_crispri_208938	1646
0NONE_na_crispri_208944	2105
0NONE_na_crispri_208954	1626
0NONE_na_crispri_208958	1885
0NONE_na_crispri_208963	1750
0NONE_na_crispri_208969	1700
0NONE_na_crispri_208974	2883
0NONE_na_crispri_208977	1368
0NONE_na_crispri_208978	1646
0NONE_na_crispri_208992	2151
0NONE_na_crispri_208996	2296
0NONE_na_crispri_209000	2400
0NONE_na_crispri_209004	3274
0NONE_na_crispri_209006	3011
0NONE_na_crispri_209014	1090
0NONE_na_crispri_209016	1873
0NONE_na_crispri_209018	1542
0NONE_na_crispri_209021	1330
0NONE_na_crispri_209022	1399
0NONE_na_crispri_209027	1523
0NONE_na_crispri_209030	1549
0NONE_na_crispri_209033	1562
0NONE_na_crispri_209034	1865
0NONE_na_crispri_209036	3311
0NONE_na_crispri_209038	1946
0NONE_na_crispri_209042	1488
0NONE_na_crispri_209064	1906
0NONE_na_crispri_209065	1892
0NONE_na_crispri_209068	1624
0Safe_safe_ACOC_204555.4506	3052
0Safe_safe_ACOC_204560.4511	4154
0Safe_safe_ACOC_204571.4522	3181
0Safe_safe_ACOC_204575.4526	845
0Safe_safe_ACOC_204590.4541	2472
0Safe_safe_ACOC_204599.4550	2157
0Safe_safe_ACOC_204608.4559	1634
0Safe_safe_ACOC_204611.4562	2830
0Safe_safe_ACOC_204625.4576	2926
0Safe_safe_ACOC_204627.4578	2236
0Safe_safe_ACOC_204629.4580	1679
0Safe_safe_ACOC_204632.4583	4073
0Safe_safe_ACOC_204663.4614	2920
0Safe_safe_ACOC_204669.4620	1197
0Safe_safe_ACOC_204672.4623	3052
0Safe_safe_ACOC_204678.4629	388
0Safe_safe_ACOC_204679.4630	3042
0Safe_safe_ACOC_204680.4631	3122
0Safe_safe_ACOC_204684.4635	5021
0Safe_safe_ACOC_204715.4666	1944
0Safe_safe_ACOC_204720.4671	3873
0Safe_safe_ACOC_204731.4682	2466
0Safe_safe_ACOC_204737.4688	3000
0Safe_safe_ACOC_204740.4691	3134
0Safe_safe_ACOC_204745.4696	2421
0Safe_safe_ACOC_204746.4697	1952
0Safe_safe_ACOC_204749.4700	1327
0Safe_safe_ACOC_204764.4715	2739
0Safe_safe_ACOC_204770.4721	3420
0Safe_safe_ACOC_204772.4723	4430
0Safe_safe_ACOC_204785.4736	1785
0Safe_safe_ACOC_204788.4739	4695
0Safe_safe_ACOC_204790.4741	3267
0Safe_safe_ACOC_204800.4751	2369
0Safe_safe_ACOC_204802.4753	2183
0Safe_safe_ACOC_204808.4759	1949
0Safe_safe_ACOC_204809.4760	3583
0Safe_safe_ACOC_204825.4776	3023
0Safe_safe_ACOC_204827.4778	2695
0Safe_safe_ACOC_204850.4801	2200
0Safe_safe_ACOC_204854.4805	2506
0Safe_safe_ACOC_204872.4823	1204
0Safe_safe_ACOC_204876.4827	2918
0Safe_safe_ACOC_204877.4828	2650
0Safe_safe_ACOC_204887.4838	2092
0Safe_safe_ACOC_204889.4840	2714
0Safe_safe_ACOC_204891.4842	2245
0Safe_safe_ACOC_204905.4856	1848
0Safe_safe_ACOC_204906.4857	1867
0Safe_safe_ACOC_204910.4861	2614
0Safe_safe_ACOC_204921.4872	2849
0Safe_safe_ACOC_204930.4881	1965
0Safe_safe_ACOC_204934.4885	1461
0Safe_safe_ACOC_204937.4888	2059
0Safe_safe_ACOC_204941.4892	1998
0Safe_safe_ACOC_204947.4898	2509
0Safe_safe_ACOC_204950.4901	2358
0Safe_safe_ACOC_204958.4909	1581
0Safe_safe_ACOC_204960.4911	3534
0Safe_safe_ACOC_204964.4915	2931
0Safe_safe_ACOC_204965.4916	2316
0Safe_safe_ACOC_204975.4926	3165
0Safe_safe_ACOC_205005.4956	2911
0Safe_safe_ACOC_205024.4975	3302
0Safe_safe_ACOC_205030.4981	2259
0Safe_safe_ACOC_205036.4987	2522
0Safe_safe_ACOC_205038.4989	2168
0Safe_safe_ACOC_205049.5000	1709
0Safe_safe_ACOC_205050.5001	4187
0Safe_safe_ACOC_205053.5004	4277
0Safe_safe_ACOC_205060.5011	1763
0Safe_safe_ACOC_205064.5015	2104
0Safe_safe_ACOC_205065.5016	3662
0Safe_safe_ACOC_205066.5017	2559
0Safe_safe_ACOC_205072.5023	1985
0Safe_safe_ACOC_205080.5031	1978
0Safe_safe_ACOC_205084.5035	2567
0Safe_safe_ACOC_205094.5045	1775
0Safe_safe_ACOC_205100.5051	1792
0Safe_safe_ACOC_205107.5058	2131
0Safe_safe_ACOC_205109.5060	2424
0Safe_safe_ACOC_205129.5080	1912
0Safe_safe_ACOC_205133.5084	2113
0Safe_safe_ACOC_205135.5086	1731
0Safe_safe_ACOC_205137.5088	3649
0Safe_safe_ACOC_205139.5090	2359
0Safe_safe_ACOC_205142.5093	3596
0Safe_safe_ACOC_205144.5095	3582
0Safe_safe_ACOC_205150.5101	3599
0Safe_safe_ACOC_205162.5113	2024
0Safe_safe_ACOC_205163.5114	2952
0Safe_safe_ACOC_205174.5125	3616
0Safe_safe_ACOC_205189.5140	3218
0Safe_safe_ACOC_205192.5143	2588
0Safe_safe_ACOC_205196.5147	2780
0Safe_safe_ACOC_205201.5152	2644
0Safe_safe_ACOC_205211.5162	3215
0Safe_safe_ACOC_205221.5172	2638
0Safe_safe_ACOC_205237.5188	2679
0Safe_safe_ACOC_205243.5194	2148
0Safe_safe_ACOC_205250.5201	2257
0Safe_safe_ACOC_205261.5212	2491
0Safe_safe_ACOC_205265.5216	2981
0Safe_safe_ACOC_205270.5221	2180
0Safe_safe_ACOC_205272.5223	2266
0Safe_safe_ACOC_205278.5229	2413
0Safe_safe_ACOC_205285.5236	1546
0Safe_safe_ACOC_205297.5248	2433
0Safe_safe_ACOC_205299.5250	2962
0Safe_safe_DTKP_205310.5261	2204
0Safe_safe_DTKP_205314.5265	2396
0Safe_safe_DTKP_205318.5269	1840
0Safe_safe_DTKP_205319.5270	3493
0Safe_safe_DTKP_205324.5275	3144
0Safe_safe_DTKP_205325.5276	2890
0Safe_safe_DTKP_205340.5291	2529
0Safe_safe_DTKP_205341.5292	2991
0Safe_safe_DTKP_205342.5293	2055
0Safe_safe_DTKP_205343.5294	1549
0Safe_safe_DTKP_205348.5299	1547
0Safe_safe_DTKP_205368.5319	1670
0Safe_safe_DTKP_205373.5324	3164
0Safe_safe_DTKP_205380.5331	3348
0Safe_safe_DTKP_205390.5341	2375
0Safe_safe_DTKP_205391.5342	2187
0Safe_safe_DTKP_205392.5343	2764
0Safe_safe_DTKP_205393.5344	894
0Safe_safe_DTKP_205411.5362	2067
0Safe_safe_DTKP_205422.5373	2208
0Safe_safe_DTKP_205423.5374	2290
0Safe_safe_DTKP_205424.5375	2527
0Safe_safe_DTKP_205448.5399	2914
0Safe_safe_DTKP_205449.5400	3325
0Safe_safe_DTKP_205477.5428	3117
0Safe_safe_DTKP_205480.5431	2732
0Safe_safe_DTKP_205483.5434	1399
0Safe_safe_DTKP_205488.5439	4690
0Safe_safe_DTKP_205490.5441	3213
0Safe_safe_DTKP_205492.5443	1700
0Safe_safe_DTKP_205504.5455	1975
0Safe_safe_DTKP_205505.5456	1907
0Safe_safe_DTKP_205509.5460	3280
0Safe_safe_DTKP_205511.5462	2291
0Safe_safe_DTKP_205513.5464	2606
0Safe_safe_DTKP_205521.5472	2250
0Safe_safe_DTKP_205529.5480	2987
0Safe_safe_DTKP_205533.5484	1975
0Safe_safe_DTKP_205538.5489	2565
0Safe_safe_DTKP_205539.5490	1067
0Safe_safe_DTKP_205542.5493	3162
0Safe_safe_DTKP_205543.5494	4112
0Safe_safe_DTKP_205554.5505	4855
0Safe_safe_DTKP_205556.5507	2396
0Safe_safe_DTKP_205558.5509	3191
0Safe_safe_DTKP_205562.5513	4367
0Safe_safe_DTKP_205563.5514	2204
0Safe_safe_DTKP_205569.5520	1434
0Safe_safe_DTKP_205574.5525	1136
0Safe_safe_DTKP_205581.5532	1452
0Safe_safe_DTKP_205584.5535	3163
0Safe_safe_DTKP_205585.5536	3217
0Safe_safe_DTKP_205591.5542	1688
0Safe_safe_DTKP_205599.5550	2935
0Safe_safe_DTKP_205613.5564	790
0Safe_safe_DTKP_205620.5571	3625
0Safe_safe_DTKP_205640.5591	1395
0Safe_safe_DTKP_205681.5632	1702
0Safe_safe_DTKP_205686.5637	3132
0Safe_safe_DTKP_205711.5662	2629
0Safe_safe_DTKP_205718.5669	3931
0Safe_safe_DTKP_205723.5674	1832
0Safe_safe_DTKP_205727.5678	2068
0Safe_safe_DTKP_205733.5684	1856
0Safe_safe_DTKP_205749.5700	2541
0Safe_safe_DTKP_205753.5704	3169
0Safe_safe_DTKP_205761.5712	2163
0Safe_safe_DTKP_205768.5719	3642
0Safe_safe_DTKP_205774.5725	2497
0Safe_safe_DTKP_205778.5729	1884
0Safe_safe_DTKP_205789.5740	2718
0Safe_safe_DTKP_205790.5741	1287
0Safe_safe_DTKP_205794.5745	3905
0Safe_safe_DTKP_205803.5754	1857
0Safe_safe_DTKP_205818.5769	1951
0Safe_safe_DTKP_205820.5771	2516
0Safe_safe_DTKP_205822.5773	1225
0Safe_safe_DTKP_205839.5790	3333
0Safe_safe_DTKP_205872.5823	2923
0Safe_safe_DTKP_205877.5828	2324
0Safe_safe_DTKP_205884.5835	3020
0Safe_safe_DTKP_205900.5851	2368
0Safe_safe_DTKP_205926.5877	1933
0Safe_safe_DTKP_205940.5891	2107
0Safe_safe_DTKP_205944.5895	1863
0Safe_safe_DTKP_205950.5901	4451
0Safe_safe_DTKP_205963.5914	3604
0Safe_safe_DTKP_205983.5934	2656
0Safe_safe_DTKP_205986.5937	3204
0Safe_safe_DTKP_205988.5939	2485
0Safe_safe_DTKP_205992.5943	1505
0Safe_safe_DTKP_205998.5949	1443
0Safe_safe_DTKP_206016.5967	2649
0Safe_safe_DTKP_206017.5968	1353
0Safe_safe_DTKP_206021.5972	2394
0Safe_safe_DTKP_206023.5974	2222
0Safe_safe_DTKP_206030.5981	2514
0Safe_safe_DTKP_206036.5987	2154
0Safe_safe_DTKP_206045.5996	2758
0Safe_safe_DTKP_206046.5997	3996
0Safe_safe_GEEX_206053.1504	2658
0Safe_safe_GEEX_206056.1507	4514
0Safe_safe_GEEX_206061.1512	2852
0Safe_safe_GEEX_206067.1518	3744
0Safe_safe_GEEX_206081.1532	3077
0Safe_safe_GEEX_206095.1546	2371
0Safe_safe_GEEX_206113.1564	1084
0Safe_safe_GEEX_206119.1570	2263
0Safe_safe_GEEX_206123.1574	1950
0Safe_safe_GEEX_206125.1576	1850
0Safe_safe_GEEX_206126.1577	3389
0Safe_safe_GEEX_206141.1592	4012
0Safe_safe_GEEX_206146.1597	3630
0Safe_safe_GEEX_206147.1598	2915
0Safe_safe_GEEX_206148.1599	2707
0Safe_safe_GEEX_206149.1600	1759
0Safe_safe_GEEX_206154.1605	2815
0Safe_safe_GEEX_206155.1606	1075
0Safe_safe_GEEX_206156.1607	3313
0Safe_safe_GEEX_206164.1615	4390
0Safe_safe_GEEX_206167.1618	3319
0Safe_safe_GEEX_206170.1621	2626
0Safe_safe_GEEX_206192.1643	2773
0Safe_safe_GEEX_206199.1650	2200
0Safe_safe_GEEX_206206.1657	1814
0Safe_safe_GEEX_206210.1661	2515
0Safe_safe_GEEX_206217.1668	4509
0Safe_safe_GEEX_206232.1683	2675
0Safe_safe_GEEX_206235.1686	4245
0Safe_safe_GEEX_206236.1687	2019
0Safe_safe_GEEX_206238.1689	3753
0Safe_safe_GEEX_206242.1693	1308
0Safe_safe_GEEX_206243.1694	2758
0Safe_safe_GEEX_206251.1702	2255
0Safe_safe_GEEX_206253.1704	3259
0Safe_safe_GEEX_206254.1705	2184
0Safe_safe_GEEX_206258.1709	1726
0Safe_safe_GEEX_206259.1710	1735
0Safe_safe_GEEX_206268.1719	3070
0Safe_safe_GEEX_206273.1724	2088
0Safe_safe_GEEX_206276.1727	1866
0Safe_safe_GEEX_206290.1741	1725
0Safe_safe_GEEX_206293.1744	3759
0Safe_safe_GEEX_206294.1745	2278
0Safe_safe_GEEX_206301.1752	2109
0Safe_safe_GEEX_206305.1756	3842
0Safe_safe_GEEX_206311.1762	1216
0Safe_safe_GEEX_206321.1772	1890
0Safe_safe_GEEX_206325.1776	3187
0Safe_safe_GEEX_206329.1780	2060
0Safe_safe_GEEX_206335.1786	1415
0Safe_safe_GEEX_206336.1787	3099
0Safe_safe_GEEX_206338.1789	1952
0Safe_safe_GEEX_206346.1797	2042
0Safe_safe_GEEX_206352.1803	3217
0Safe_safe_GEEX_206359.1810	1803
0Safe_safe_GEEX_206374.1825	2186
0Safe_safe_GEEX_206375.1826	3442
0Safe_safe_GEEX_206383.1834	3001
0Safe_safe_GEEX_206391.1842	2135
0Safe_safe_GEEX_206394.1845	3414
0Safe_safe_GEEX_206399.1850	3652
0Safe_safe_GEEX_206400.1851	2107
0Safe_safe_GEEX_206405.1856	3948
0Safe_safe_GEEX_206411.1862	2999
0Safe_safe_GEEX_206415.1866	2102
0Safe_safe_GEEX_206417.1868	2623
0Safe_safe_GEEX_206421.1872	3043
0Safe_safe_GEEX_206440.1891	3406
0Safe_safe_GEEX_206443.1894	5966
0Safe_safe_GEEX_206445.1896	3013
0Safe_safe_GEEX_206451.1902	2615
0Safe_safe_GEEX_206463.1914	2393
0Safe_safe_GEEX_206501.1952	3351
0Safe_safe_GEEX_206502.1953	2457
0Safe_safe_GEEX_206507.1958	3147
0Safe_safe_GEEX_206510.1961	773
0Safe_safe_GEEX_206522.1973	1815
0Safe_safe_GEEX_206526.1977	2387
0Safe_safe_GEEX_206530.1981	2329
0Safe_safe_GEEX_206541.1992	2592
0Safe_safe_GEEX_206547.1998	2332
0Safe_safe_GEEX_206551.2002	4049
0Safe_safe_GEEX_206552.2003	1714
0Safe_safe_GEEX_206553.2004	3329
0Safe_safe_GEEX_206557.2008	2735
0Safe_safe_GEEX_206565.2016	1528
0Safe_safe_GEEX_206580.2031	3388
0Safe_safe_GEEX_206583.2034	4012
0Safe_safe_GEEX_206585.2036	2682
0Safe_safe_GEEX_206587.2038	3205
0Safe_safe_GEEX_206588.2039	2851
0Safe_safe_GEEX_206597.2048	3060
0Safe_safe_GEEX_206613.2064	1560
0Safe_safe_GEEX_206626.2077	4020
0Safe_safe_GEEX_206642.2093	1833
0Safe_safe_GEEX_206648.2099	2381
0Safe_safe_GEEX_206649.2100	2250
0Safe_safe_GEEX_206676.2127	3316
0Safe_safe_GEEX_206685.2136	2745
0Safe_safe_GEEX_206705.2156	3384
0Safe_safe_GEEX_206720.2171	2061
0Safe_safe_GEEX_206730.2181	1679
0Safe_safe_GEEX_206731.2182	2374
0Safe_safe_GEEX_206743.2194	1968
0Safe_safe_GEEX_206747.2198	1502
0Safe_safe_GEEX_206753.2204	1788
0Safe_safe_GEEX_206760.2211	2971
0Safe_safe_GEEX_206774.2225	2588
0Safe_safe_GEEX_206778.2229	840
0Safe_safe_GEEX_206781.2232	3521
0Safe_safe_GEEX_206784.2235	1883
0Safe_safe_GEEX_206792.2243	2905
0Safe_safe_GEEX_206793.2244	2332
0Safe_safe_MEPR_206803.1003	3005
0Safe_safe_MEPR_206804.1004	1950
0Safe_safe_MEPR_206807.1007	1485
0Safe_safe_MEPR_206810.1010	1553
0Safe_safe_MEPR_206814.1014	3926
0Safe_safe_MEPR_206826.1026	4053
0Safe_safe_MEPR_206827.1027	3839
0Safe_safe_MEPR_206843.1043	2453
0Safe_safe_MEPR_206857.1057	3036
0Safe_safe_MEPR_206859.1059	3646
0Safe_safe_MEPR_206869.1069	2611
0Safe_safe_MEPR_206870.1070	2313
0Safe_safe_MEPR_206876.1076	2355
0Safe_safe_MEPR_206891.1091	2890
0Safe_safe_MEPR_206892.1092	3385
0Safe_safe_MEPR_206896.1096	1616
0Safe_safe_MEPR_206901.1101	3267
0Safe_safe_MEPR_206914.1114	2161
0Safe_safe_MEPR_206916.1116	2437
0Safe_safe_MEPR_206918.1118	2168
0Safe_safe_MEPR_206921.1121	3149
0Safe_safe_MEPR_206930.1130	1669
0Safe_safe_MEPR_206935.1135	3570
0Safe_safe_MEPR_206938.1138	2454
0Safe_safe_MEPR_206951.1151	3978
0Safe_safe_MEPR_206960.1160	2669
0Safe_safe_MEPR_206961.1161	930
0Safe_safe_MEPR_206965.1165	2725
0Safe_safe_MEPR_206968.1168	1405
0Safe_safe_MEPR_206970.1170	4893
0Safe_safe_MEPR_206976.1176	3084
0Safe_safe_MEPR_206979.1179	2506
0Safe_safe_MEPR_206983.1183	2322
0Safe_safe_MEPR_206989.1189	1745
0Safe_safe_MEPR_207012.1212	3226
0Safe_safe_MEPR_207015.1215	2653
0Safe_safe_MEPR_207019.1219	3113
0Safe_safe_MEPR_207025.1225	1523
0Safe_safe_MEPR_207028.1228	2415
0Safe_safe_MEPR_207030.1230	497
0Safe_safe_MEPR_207031.1231	1184
0Safe_safe_MEPR_207036.1236	2969
0Safe_safe_MEPR_207037.1237	2674
0Safe_safe_MEPR_207042.1242	1456
0Safe_safe_MEPR_207045.1245	3533
0Safe_safe_MEPR_207057.1257	3431
0Safe_safe_MEPR_207060.1260	3051
0Safe_safe_MEPR_207070.1270	2141
0Safe_safe_MEPR_207071.1271	2197
0Safe_safe_MEPR_207073.1273	1956
0Safe_safe_MEPR_207101.1301	1179
0Safe_safe_MEPR_207106.1306	657
0Safe_safe_MEPR_207108.1308	2098
0Safe_safe_MEPR_207112.1312	1550
0Safe_safe_MEPR_207133.1333	2495
0Safe_safe_MEPR_207148.1348	3337
0Safe_safe_MEPR_207151.1351	2979
0Safe_safe_MEPR_207158.1358	2250
0Safe_safe_MEPR_207162.1362	1819
0Safe_safe_MEPR_207168.1368	2860
0Safe_safe_MEPR_207169.1369	2221
0Safe_safe_MEPR_207173.1373	1425
0Safe_safe_MEPR_207175.1375	1332
0Safe_safe_MEPR_207181.1381	3271
0Safe_safe_MEPR_207196.1396	5170
0Safe_safe_MEPR_207198.1398	3234
0Safe_safe_MEPR_207203.1403	2018
0Safe_safe_MEPR_207215.1415	2174
0Safe_safe_MEPR_207254.1454	2719
0Safe_safe_MEPR_207260.1460	2735
0Safe_safe_MEPR_207271.1471	2915
0Safe_safe_MEPR_207273.1473	2825
0Safe_safe_MEPR_207276.1476	3564
0Safe_safe_MEPR_207297.1497	1391
0Safe_safe_MEPR_207300.1500	4373
0Safe_safe_MEPR_207304.754	3312
0Safe_safe_MEPR_207323.773	3443
0Safe_safe_MEPR_207325.775	4494
0Safe_safe_MEPR_207329.779	3621
0Safe_safe_MEPR_207331.781	2412
0Safe_safe_MEPR_207334.784	1992
0Safe_safe_MEPR_207339.789	659
0Safe_safe_MEPR_207347.797	2511
0Safe_safe_MEPR_207348.798	2588
0Safe_safe_MEPR_207351.801	968
0Safe_safe_MEPR_207381.831	1554
0Safe_safe_MEPR_207386.836	1486
0Safe_safe_MEPR_207387.837	3582
0Safe_safe_MEPR_207389.839	4607
0Safe_safe_MEPR_207392.842	2278
0Safe_safe_MEPR_207397.847	2885
0Safe_safe_MEPR_207402.852	3577
0Safe_safe_MEPR_207413.863	2323
0Safe_safe_MEPR_207414.864	2157
0Safe_safe_MEPR_207429.879	4057
0Safe_safe_MEPR_207454.904	3390
0Safe_safe_MEPR_207455.905	2018
0Safe_safe_MEPR_207456.906	1355
0Safe_safe_MEPR_207462.912	4354
0Safe_safe_MEPR_207467.917	2662
0Safe_safe_MEPR_207471.921	2425
0Safe_safe_MEPR_207478.928	3292
0Safe_safe_MEPR_207481.931	1018
0Safe_safe_MEPR_207484.934	1615
0Safe_safe_MEPR_207486.936	1249
0Safe_safe_MEPR_207487.937	2297
0Safe_safe_MEPR_207488.938	2188
0Safe_safe_MEPR_207490.940	918
0Safe_safe_MEPR_207491.941	1441
0Safe_safe_MEPR_207494.944	2379
0Safe_safe_MEPR_207495.945	1483
0Safe_safe_MEPR_207497.947	2189
0Safe_safe_MEPR_207500.950	3149
0Safe_safe_MEPR_207502.952	2817
0Safe_safe_MEPR_207518.968	1648
0Safe_safe_MEPR_207534.984	3489
0Safe_safe_MEPR_207542.992	2552
0Safe_safe_MEPR_207544.994	2380
0Safe_safe_PROT_207550.2251	3981
0Safe_safe_PROT_207553.2254	2764
0Safe_safe_PROT_207554.2255	1738
0Safe_safe_PROT_207559.2260	1071
0Safe_safe_PROT_207566.2267	2366
0Safe_safe_PROT_207578.2279	2894
0Safe_safe_PROT_207581.2282	2335
0Safe_safe_PROT_207597.2298	1302
0Safe_safe_PROT_207600.2301	2036
0Safe_safe_PROT_207604.2305	3023
0Safe_safe_PROT_207605.2306	3844
0Safe_safe_PROT_207610.2311	1173
0Safe_safe_PROT_207611.2312	2131
0Safe_safe_PROT_207617.2318	2005
0Safe_safe_PROT_207628.2329	1285
0Safe_safe_PROT_207631.2332	2458
0Safe_safe_PROT_207634.2335	1804
0Safe_safe_PROT_207643.2344	3827
0Safe_safe_PROT_207645.2346	2882
0Safe_safe_PROT_207653.2354	3032
0Safe_safe_PROT_207662.2363	3966
0Safe_safe_PROT_207675.2376	2194
0Safe_safe_PROT_207698.2399	2857
0Safe_safe_PROT_207700.2401	4894
0Safe_safe_PROT_207702.2403	1417
0Safe_safe_PROT_207703.2404	2383
0Safe_safe_PROT_207730.2431	2753
0Safe_safe_PROT_207734.2435	1950
0Safe_safe_PROT_207736.2437	2982
0Safe_safe_PROT_207737.2438	4658
0Safe_safe_PROT_207739.2440	1681
0Safe_safe_PROT_207741.2442	1335
0Safe_safe_PROT_207786.2487	2522
0Safe_safe_PROT_207794.2495	433
0Safe_safe_PROT_207801.2502	871
0Safe_safe_PROT_207802.2503	3724
0Safe_safe_PROT_207827.2528	3121
0Safe_safe_PROT_207833.2534	1847
0Safe_safe_PROT_207836.2537	1885
0Safe_safe_PROT_207841.2542	1644
0Safe_safe_PROT_207844.2545	3327
0Safe_safe_PROT_207847.2548	2132
0Safe_safe_PROT_207854.2555	2565
0Safe_safe_PROT_207862.2563	2519
0Safe_safe_PROT_207863.2564	2439
0Safe_safe_PROT_207876.2577	1662
0Safe_safe_PROT_207878.2579	3510
0Safe_safe_PROT_207887.2588	1437
0Safe_safe_PROT_207896.2597	2125
0Safe_safe_PROT_207901.2602	1185
0Safe_safe_PROT_207908.2609	1628
0Safe_safe_PROT_207912.2613	3370
0Safe_safe_PROT_207914.2615	2778
0Safe_safe_PROT_207916.2617	1678
0Safe_safe_PROT_207926.2627	3195
0Safe_safe_PROT_207928.2629	1793
0Safe_safe_PROT_207931.2632	2306
0Safe_safe_PROT_207932.2633	2050
0Safe_safe_PROT_207933.2634	4432
0Safe_safe_PROT_207936.2637	3002
0Safe_safe_PROT_207937.2638	1797
0Safe_safe_PROT_207949.2650	2219
0Safe_safe_PROT_207952.2653	1490
0Safe_safe_PROT_207960.2661	3186
0Safe_safe_PROT_207962.2663	2258
0Safe_safe_PROT_207973.2674	2959
0Safe_safe_PROT_207980.2681	4904
0Safe_safe_PROT_207983.2684	2227
0Safe_safe_PROT_207986.2687	3717
0Safe_safe_PROT_207990.2691	3320
0Safe_safe_PROT_207992.2693	3051
0Safe_safe_PROT_208008.2709	1823
0Safe_safe_PROT_208009.2710	1803
0Safe_safe_PROT_208013.2714	3188
0Safe_safe_PROT_208021.2722	1899
0Safe_safe_PROT_208030.2731	1962
0Safe_safe_PROT_208031.2732	2767
0Safe_safe_PROT_208032.2733	2563
0Safe_safe_PROT_208035.2736	3194
0Safe_safe_PROT_208041.2742	2074
0Safe_safe_PROT_208044.2745	2509
0Safe_safe_PROT_208046.2747	4161
0Safe_safe_PROT_208050.2751	2033
0Safe_safe_PROT_208051.2752	2541
0Safe_safe_PROT_208054.2755	2299
0Safe_safe_PROT_208062.2763	3096
0Safe_safe_PROT_208082.2783	1296
0Safe_safe_PROT_208086.2787	2773
0Safe_safe_PROT_208087.2788	4196
0Safe_safe_PROT_208095.2796	3584
0Safe_safe_PROT_208096.2797	1811
0Safe_safe_PROT_208101.2802	3268
0Safe_safe_PROT_208106.2807	2132
0Safe_safe_PROT_208111.2812	2126
0Safe_safe_PROT_208127.2828	5050
0Safe_safe_PROT_208148.2849	2529
0Safe_safe_PROT_208165.2866	3200
0Safe_safe_PROT_208166.2867	2326
0Safe_safe_PROT_208174.2875	2216
0Safe_safe_PROT_208177.2878	2776
0Safe_safe_PROT_208180.2881	3366
0Safe_safe_PROT_208181.2882	3281
0Safe_safe_PROT_208190.2891	1849
0Safe_safe_PROT_208213.2914	2210
0Safe_safe_PROT_208219.2920	2840
0Safe_safe_PROT_208220.2921	1711
0Safe_safe_PROT_208222.2923	4333
0Safe_safe_PROT_208232.2933	2857
0Safe_safe_PROT_208233.2934	3724
0Safe_safe_PROT_208235.2936	2586
0Safe_safe_PROT_208237.2938	5621
0Safe_safe_PROT_208247.2948	3728
0Safe_safe_PROT_208248.2949	2165
0Safe_safe_PROT_208262.2963	2225
0Safe_safe_PROT_208263.2964	3705
0Safe_safe_PROT_208267.2968	2773
0Safe_safe_PROT_208268.2969	1990
0Safe_safe_PROT_208269.2970	2275
0Safe_safe_PROT_208276.2977	2679
0Safe_safe_PROT_208288.2989	3386
0Safe_safe_PROT_208299.3000	3876
0Safe_safe_TMMO_208300.1	2071
0Safe_safe_TMMO_208309.107	3228
0Safe_safe_TMMO_208317.114	4433
0Safe_safe_TMMO_208324.120	3033
0Safe_safe_TMMO_208335.130	2973
0Safe_safe_TMMO_208340.135	2365
0Safe_safe_TMMO_208349.143	2663
0Safe_safe_TMMO_208368.160	3531
0Safe_safe_TMMO_208381.172	1896
0Safe_safe_TMMO_208382.173	2998
0Safe_safe_TMMO_208393.183	1898
0Safe_safe_TMMO_208399.189	3931
0Safe_safe_TMMO_208401.190	2853
0Safe_safe_TMMO_208403.192	2583
0Safe_safe_TMMO_208410.199	1708
0Safe_safe_TMMO_208416.203	1984
0Safe_safe_TMMO_208429.215	826
0Safe_safe_TMMO_208438.223	2596
0Safe_safe_TMMO_208439.224	4132
0Safe_safe_TMMO_208451.235	2781
0Safe_safe_TMMO_208454.238	2049
0Safe_safe_TMMO_208475.257	2834
0Safe_safe_TMMO_208485.266	1732
0Safe_safe_TMMO_208492.272	3710
0Safe_safe_TMMO_208506.285	3859
0Safe_safe_TMMO_208531.307	1761
0Safe_safe_TMMO_208535.310	1605
0Safe_safe_TMMO_208541.316	2223
0Safe_safe_TMMO_208549.323	3918
0Safe_safe_TMMO_208574.346	2769
0Safe_safe_TMMO_208576.348	4198
0Safe_safe_TMMO_208577.349	3065
0Safe_safe_TMMO_208582.353	3862
0Safe_safe_TMMO_208583.354	2868
0Safe_safe_TMMO_208590.360	2912
0Safe_safe_TMMO_208611.38	1867
0Safe_safe_TMMO_208614.382	1697
0Safe_safe_TMMO_208616.384	2801
0Safe_safe_TMMO_208618.386	1535
0Safe_safe_TMMO_208628.395	3581
0Safe_safe_TMMO_208630.397	1046
0Safe_safe_TMMO_208631.398	4355
0Safe_safe_TMMO_208634.40	1498
0Safe_safe_TMMO_208649.413	2011
0Safe_safe_TMMO_208654.418	2759
0Safe_safe_TMMO_208657.420	2246
0Safe_safe_TMMO_208677.439	2352
0Safe_safe_TMMO_208691.451	1927
0Safe_safe_TMMO_208697.457	2639
0Safe_safe_TMMO_208704.463	2577
0Safe_safe_TMMO_208707.466	310
0Safe_safe_TMMO_208710.469	2271
0Safe_safe_TMMO_208724.481	2344
0Safe_safe_TMMO_208726.483	2871
0Safe_safe_TMMO_208727.484	2159
0Safe_safe_TMMO_208730.487	2924
0Safe_safe_TMMO_208735.491	2315
0Safe_safe_TMMO_208737.493	3354
0Safe_safe_TMMO_208739.495	1117
0Safe_safe_TMMO_208756.51	2758
0Safe_safe_TMMO_208773.525	3914
0Safe_safe_TMMO_208778.53	3419
0Safe_safe_TMMO_208786.537	2408
0Safe_safe_TMMO_208793.543	3287
0Safe_safe_TMMO_208794.544	1821
0Safe_safe_TMMO_208799.549	2411
0Safe_safe_TMMO_208802.551	2013
0Safe_safe_TMMO_208805.554	3927
0Safe_safe_TMMO_208812.560	3059
0Safe_safe_TMMO_208831.578	2413
0Safe_safe_TMMO_208832.579	2610
0Safe_safe_TMMO_208854.599	2628
0Safe_safe_TMMO_208867.61	3621
0Safe_safe_TMMO_208868.610	2591
0Safe_safe_TMMO_208882.623	2269
0Safe_safe_TMMO_208886.627	2879
0Safe_safe_TMMO_208911.65	2824
0Safe_safe_TMMO_208913.651	3495
0Safe_safe_TMMO_208917.655	4353
0Safe_safe_TMMO_208918.656	3038
0Safe_safe_TMMO_208919.657	1034
0Safe_safe_TMMO_208926.663	5520
0Safe_safe_TMMO_208939.675	3636
0Safe_safe_TMMO_208947.682	2057
0Safe_safe_TMMO_208958.692	2563
0Safe_safe_TMMO_208962.696	1963
0Safe_safe_TMMO_208963.697	1517
0Safe_safe_TMMO_208980.711	2267
0Safe_safe_TMMO_208983.714	2897
0Safe_safe_TMMO_208990.720	3266
0Safe_safe_TMMO_208993.723	2198
0Safe_safe_TMMO_208997.727	1764
0Safe_safe_TMMO_209005.734	1167
0Safe_safe_TMMO_209012.740	1970
0Safe_safe_TMMO_209013.741	2159
0Safe_safe_TMMO_209016.744	2080
0Safe_safe_TMMO_209019.747	2528
0Safe_safe_TMMO_209022.75	2091
0Safe_safe_TMMO_209024.76	3582
0Safe_safe_TMMO_209025.77	2978
0Safe_safe_TMMO_209031.82	3021
0Safe_safe_TMMO_209036.87	967
0Safe_safe_TMMO_209039.9	1372
0Safe_safe_TMMO_209043.93	1686
0Safe_safe_UNA1_209066.3767	2641
0Safe_safe_UNA1_209072.3773	3132
0Safe_safe_UNA1_209089.3790	3047
0Safe_safe_UNA1_209095.3796	3084
0Safe_safe_UNA1_209107.3808	3819
0Safe_safe_UNA1_209114.3815	2959
0Safe_safe_UNA1_209119.3820	2145
0Safe_safe_UNA1_209126.3827	1938
0Safe_safe_UNA1_209127.3828	2059
0Safe_safe_UNA1_209137.3838	1957
0Safe_safe_UNA1_209150.3851	3821
0Safe_safe_UNA1_209153.3854	4355
0Safe_safe_UNA1_209162.3863	3491
0Safe_safe_UNA1_209166.3867	4012
0Safe_safe_UNA1_209181.3882	2469
0Safe_safe_UNA1_209182.3883	1379
0Safe_safe_UNA1_209187.3888	1937
0Safe_safe_UNA1_209191.3892	2472
0Safe_safe_UNA1_209192.3893	1973
0Safe_safe_UNA1_209194.3895	2785
0Safe_safe_UNA1_209198.3899	1836
0Safe_safe_UNA1_209205.3906	4317
0Safe_safe_UNA1_209206.3907	1375
0Safe_safe_UNA1_209208.3909	3497
0Safe_safe_UNA1_209212.3913	3114
0Safe_safe_UNA1_209217.3918	60
0Safe_safe_UNA1_209218.3919	1609
0Safe_safe_UNA1_209236.3937	5184
0Safe_safe_UNA1_209245.3946	2418
0Safe_safe_UNA1_209266.3967	3480
0Safe_safe_UNA1_209280.3981	1545
0Safe_safe_UNA1_209283.3984	1907
0Safe_safe_UNA1_209289.3990	2461
0Safe_safe_UNA1_209292.3993	1904
0Safe_safe_UNA1_209294.3995	3544
0Safe_safe_UNA1_209313.4014	2780
0Safe_safe_UNA1_209320.4021	3589
0Safe_safe_UNA1_209331.4032	3211
0Safe_safe_UNA1_209340.4041	1929
0Safe_safe_UNA1_209344.4045	4159
0Safe_safe_UNA1_209349.4050	2001
0Safe_safe_UNA1_209352.4053	3265
0Safe_safe_UNA1_209353.4054	2233
0Safe_safe_UNA1_209355.4056	534
0Safe_safe_UNA1_209358.4059	2021
0Safe_safe_UNA1_209365.4066	1514
0Safe_safe_UNA1_209366.4067	1653
0Safe_safe_UNA1_209372.4073	1374
0Safe_safe_UNA1_209373.4074	2655
0Safe_safe_UNA1_209380.4081	3731
0Safe_safe_UNA1_209387.4088	2199
0Safe_safe_UNA1_209411.4112	2606
0Safe_safe_UNA1_209413.4114	3778
0Safe_safe_UNA1_209424.4125	3431
0Safe_safe_UNA1_209433.4134	1824
0Safe_safe_UNA1_209436.4137	2193
0Safe_safe_UNA1_209441.4142	2932
0Safe_safe_UNA1_209445.4146	2044
0Safe_safe_UNA1_209446.4147	3625
0Safe_safe_UNA1_209464.4165	898
0Safe_safe_UNA1_209467.4168	2831
0Safe_safe_UNA1_209471.4172	1082
0Safe_safe_UNA1_209473.4174	1885
0Safe_safe_UNA1_209474.4175	2186
0Safe_safe_UNA1_209477.4178	2585
0Safe_safe_UNA1_209479.4180	1821
0Safe_safe_UNA1_209485.4186	2407
0Safe_safe_UNA1_209487.4188	2274
0Safe_safe_UNA1_209508.4209	2403
0Safe_safe_UNA1_209510.4211	2162
0Safe_safe_UNA1_209513.4214	2414
0Safe_safe_UNA1_209517.4218	3866
0Safe_safe_UNA1_209523.4224	1695
0Safe_safe_UNA1_209524.4225	2809
0Safe_safe_UNA1_209525.4226	2707
0Safe_safe_UNA1_209533.4234	3235
0Safe_safe_UNA1_209546.4247	3573
0Safe_safe_UNA1_209548.4249	1872
0Safe_safe_UNA1_209564.4265	3753
0Safe_safe_UNA1_209580.4281	3455
0Safe_safe_UNA1_209583.4284	3649
0Safe_safe_UNA1_209591.4292	1110
0Safe_safe_UNA1_209595.4296	1735
0Safe_safe_UNA1_209603.4304	1741
0Safe_safe_UNA1_209608.4309	2747
0Safe_safe_UNA1_209612.4313	3497
0Safe_safe_UNA1_209627.4328	3234
0Safe_safe_UNA1_209631.4332	1714
0Safe_safe_UNA1_209633.4334	1584
0Safe_safe_UNA1_209639.4340	3410
0Safe_safe_UNA1_209642.4343	2845
0Safe_safe_UNA1_209645.4346	2432
0Safe_safe_UNA1_209646.4347	2483
0Safe_safe_UNA1_209661.4362	1193
0Safe_safe_UNA1_209678.4379	2877
0Safe_safe_UNA1_209684.4385	1851
0Safe_safe_UNA1_209685.4386	3394
0Safe_safe_UNA1_209692.4393	2805
0Safe_safe_UNA1_209693.4394	4713
0Safe_safe_UNA1_209702.4403	2841
0Safe_safe_UNA1_209707.4408	4114
0Safe_safe_UNA1_209708.4409	3729
0Safe_safe_UNA1_209714.4415	1524
0Safe_safe_UNA1_209718.4419	2651
0Safe_safe_UNA1_209726.4427	1543
0Safe_safe_UNA1_209732.4433	1831
0Safe_safe_UNA1_209735.4436	3936
0Safe_safe_UNA1_209738.4439	1806
0Safe_safe_UNA1_209753.4454	2545
0Safe_safe_UNA1_209776.4477	2121
0Safe_safe_UNA1_209779.4480	3189
0Safe_safe_UNA1_209781.4482	1624
0Safe_safe_UNA2_209806.3007	3708
0Safe_safe_UNA2_209807.3008	3068
0Safe_safe_UNA2_209811.3012	60
0Safe_safe_UNA2_209817.3018	2775
0Safe_safe_UNA2_209819.3020	3416
0Safe_safe_UNA2_209840.3041	3679
0Safe_safe_UNA2_209851.3052	1299
0Safe_safe_UNA2_209866.3067	1778
0Safe_safe_UNA2_209870.3071	1976
0Safe_safe_UNA2_209872.3073	3569
0Safe_safe_UNA2_209888.3089	2369
0Safe_safe_UNA2_209890.3091	970
0Safe_safe_UNA2_209891.3092	2527
0Safe_safe_UNA2_209896.3097	2750
0Safe_safe_UNA2_209912.3113	3293
0Safe_safe_UNA2_209918.3119	1447
0Safe_safe_UNA2_209924.3125	3688
0Safe_safe_UNA2_209925.3126	2323
0Safe_safe_UNA2_209936.3137	3834
0Safe_safe_UNA2_209941.3142	2850
0Safe_safe_UNA2_209947.3148	2587
0Safe_safe_UNA2_209950.3151	2652
0Safe_safe_UNA2_209958.3159	2209
0Safe_safe_UNA2_209977.3178	3260
0Safe_safe_UNA2_209981.3182	3990
0Safe_safe_UNA2_210003.3204	3796
0Safe_safe_UNA2_210034.3235	2448
0Safe_safe_UNA2_210050.3251	1768
0Safe_safe_UNA2_210057.3258	1912
0Safe_safe_UNA2_210059.3260	2106
0Safe_safe_UNA2_210077.3278	947
0Safe_safe_UNA2_210081.3282	2627
0Safe_safe_UNA2_210083.3284	3580
0Safe_safe_UNA2_210085.3286	3851
0Safe_safe_UNA2_210091.3292	2120
0Safe_safe_UNA2_210094.3295	2074
0Safe_safe_UNA2_210096.3297	1157
0Safe_safe_UNA2_210101.3302	1934
0Safe_safe_UNA2_210120.3321	942
0Safe_safe_UNA2_210135.3336	2610
0Safe_safe_UNA2_210139.3340	2013
0Safe_safe_UNA2_210153.3354	3366
0Safe_safe_UNA2_210155.3356	3710
0Safe_safe_UNA2_210156.3357	2485
0Safe_safe_UNA2_210166.3367	1797
0Safe_safe_UNA2_210168.3369	2671
0Safe_safe_UNA2_210183.3384	1486
0Safe_safe_UNA2_210185.3386	3408
0Safe_safe_UNA2_210192.3393	2549
0Safe_safe_UNA2_210193.3394	1983
0Safe_safe_UNA2_210200.3401	2387
0Safe_safe_UNA2_210202.3403	3185
0Safe_safe_UNA2_210204.3405	2484
0Safe_safe_UNA2_210206.3407	2539
0Safe_safe_UNA2_210221.3422	2002
0Safe_safe_UNA2_210223.3424	2983
0Safe_safe_UNA2_210226.3427	1370
0Safe_safe_UNA2_210227.3428	3271
0Safe_safe_UNA2_210236.3437	2201
0Safe_safe_UNA2_210241.3442	1722
0Safe_safe_UNA2_210247.3448	2764
0Safe_safe_UNA2_210258.3459	2736
0Safe_safe_UNA2_210265.3466	2005
0Safe_safe_UNA2_210283.3484	1526
0Safe_safe_UNA2_210288.3489	3036
0Safe_safe_UNA2_210292.3493	3134
0Safe_safe_UNA2_210294.3495	2051
0Safe_safe_UNA2_210298.3499	2166
0Safe_safe_UNA2_210299.3500	2711
0Safe_safe_UNA2_210312.3513	957
0Safe_safe_UNA2_210313.3514	2688
0Safe_safe_UNA2_210321.3522	2383
0Safe_safe_UNA2_210327.3528	2267
0Safe_safe_UNA2_210337.3538	2808
0Safe_safe_UNA2_210341.3542	2105
0Safe_safe_UNA2_210351.3552	3853
0Safe_safe_UNA2_210357.3558	2079
0Safe_safe_UNA2_210358.3559	2736
0Safe_safe_UNA2_210363.3564	2175
0Safe_safe_UNA2_210373.3574	3200
0Safe_safe_UNA2_210378.3579	1653
0Safe_safe_UNA2_210388.3589	1988
0Safe_safe_UNA2_210402.3603	3706
0Safe_safe_UNA2_210419.3620	2890
0Safe_safe_UNA2_210420.3621	2612
0Safe_safe_UNA2_210434.3635	1908
0Safe_safe_UNA2_210459.3660	1957
0Safe_safe_UNA2_210478.3679	2253
0Safe_safe_UNA2_210480.3681	749
0Safe_safe_UNA2_210483.3684	3943
0Safe_safe_UNA2_210487.3688	3155
0Safe_safe_UNA2_210489.3690	3296
0Safe_safe_UNA2_210490.3691	2881
0Safe_safe_UNA2_210500.3701	3314
0Safe_safe_UNA2_210512.3713	3216
0Safe_safe_UNA2_210521.3722	2713
0Safe_safe_UNA2_210527.3728	2271
0Safe_safe_UNA2_210538.3739	2708
0Safe_safe_UNA2_210547.3748	1666
0Safe_safe_UNA3_210560.6011	1499
0Safe_safe_UNA3_210582.6033	2384
0Safe_safe_UNA3_210586.6037	1459
0Safe_safe_UNA3_210593.6044	2603
0Safe_safe_UNA3_210599.6050	3431
0Safe_safe_UNA3_210601.6052	1782
0Safe_safe_UNA3_210606.6057	2354
0Safe_safe_UNA3_210607.6058	2338
0Safe_safe_UNA3_210612.6063	4724
0Safe_safe_UNA3_210622.6073	2027
0Safe_safe_UNA3_210628.6079	1747
0Safe_safe_UNA3_210633.6084	2743
0Safe_safe_UNA3_210634.6085	1937
0Safe_safe_UNA3_210643.6094	1033
0Safe_safe_UNA3_210644.6095	603
0Safe_safe_UNA3_210648.6099	1544
0Safe_safe_UNA3_210676.6127	2871
0Safe_safe_UNA3_210679.6130	2758
0Safe_safe_UNA3_210709.6160	3681
0Safe_safe_UNA3_210711.6162	2776
0Safe_safe_UNA3_210714.6165	2408
0Safe_safe_UNA3_210717.6168	1976
0Safe_safe_UNA3_210719.6170	2801
0Safe_safe_UNA3_210721.6172	4059
0Safe_safe_UNA3_210723.6174	2503
0Safe_safe_UNA3_210725.6176	2032
0Safe_safe_UNA3_210728.6179	2730
0Safe_safe_UNA3_210733.6184	1684
0Safe_safe_UNA3_210737.6188	2186
0Safe_safe_UNA3_210738.6189	2178
0Safe_safe_UNA3_210739.6190	3034
0Safe_safe_UNA3_210753.6204	3361
0Safe_safe_UNA3_210756.6207	2557
0Safe_safe_UNA3_210758.6209	1703
0Safe_safe_UNA3_210759.6210	3526
0Safe_safe_UNA3_210760.6211	2276
0Safe_safe_UNA3_210768.6219	2393
0Safe_safe_UNA3_210772.6223	1689
0Safe_safe_UNA3_210780.6231	2675
0Safe_safe_UNA3_210781.6232	1522
0Safe_safe_UNA3_210785.6236	2813
0Safe_safe_UNA3_210792.6243	2078
0Safe_safe_UNA3_210794.6245	1614
0Safe_safe_UNA3_210797.6248	2385
0Safe_safe_UNA3_210799.6250	1941
0Safe_safe_UNA3_210800.6251	1993
0Safe_safe_UNA3_210804.6255	2021
0Safe_safe_UNA3_210807.6258	1875
0Safe_safe_UNA3_210808.6259	1329
0Safe_safe_UNA3_210813.6264	2466
0Safe_safe_UNA3_210814.6265	2213
0Safe_safe_UNA3_210819.6270	2478
0Safe_safe_UNA3_210825.6276	1375
0Safe_safe_UNA3_210840.6291	654
0Safe_safe_UNA3_210845.6296	2740
0Safe_safe_UNA3_210850.6301	2355
0Safe_safe_UNA3_210861.6312	3439
0Safe_safe_UNA3_210867.6318	3033
0Safe_safe_UNA3_210880.6331	1702
0Safe_safe_UNA3_210882.6333	1851
0Safe_safe_UNA3_210889.6340	2996
0Safe_safe_UNA3_210913.6364	2225
0Safe_safe_UNA3_210915.6366	3712
0Safe_safe_UNA3_210936.6387	1818
0Safe_safe_UNA3_210939.6390	2542
0Safe_safe_UNA3_210944.6395	2091
0Safe_safe_UNA3_210947.6398	2755
0Safe_safe_UNA3_210949.6400	545
0Safe_safe_UNA3_210951.6402	2850
0Safe_safe_UNA3_210963.6414	2205
0Safe_safe_UNA3_210969.6420	2039
0Safe_safe_UNA3_210978.6429	2546
0Safe_safe_UNA3_210989.6440	1672
0Safe_safe_UNA3_210995.6446	1666
0Safe_safe_UNA3_211003.6454	931
0Safe_safe_UNA3_211009.6460	1270
0Safe_safe_UNA3_211011.6462	1981
0Safe_safe_UNA3_211017.6468	4870
0Safe_safe_UNA3_211022.6473	5599
0Safe_safe_UNA3_211027.6478	1865
0Safe_safe_UNA3_211034.6485	1156
0Safe_safe_UNA3_211037.6488	4338
0Safe_safe_UNA3_211051.6502	2256
0Safe_safe_UNA3_211057.6508	3961
0Safe_safe_UNA3_211063.6514	2493
0Safe_safe_UNA3_211077.6528	3606
0Safe_safe_UNA3_211078.6529	987
0Safe_safe_UNA3_211082.6533	3779
0Safe_safe_UNA3_211086.6537	3451
0Safe_safe_UNA3_211091.6542	3200
0Safe_safe_UNA3_211093.6544	2746
0Safe_safe_UNA3_211100.6551	3283
0Safe_safe_UNA3_211107.6558	2032
0Safe_safe_UNA3_211123.6574	2543
0Safe_safe_UNA3_211129.6580	3091
0Safe_safe_UNA3_211142.6593	2579
0Safe_safe_UNA3_211144.6595	2392
0Safe_safe_UNA3_211149.6600	3273
0Safe_safe_UNA3_211150.6601	2635
0Safe_safe_UNA3_211165.6616	1533
0Safe_safe_UNA3_211166.6617	3379
0Safe_safe_UNA3_211172.6623	1620
0Safe_safe_UNA3_211175.6626	3821
0Safe_safe_UNA3_211183.6634	2181
0Safe_safe_UNA3_211184.6635	2344
0Safe_safe_UNA3_211186.6637	1909
0Safe_safe_UNA3_211187.6638	1618
0Safe_safe_UNA3_211188.6639	2835
0Safe_safe_UNA3_211197.6648	1338
0Safe_safe_UNA3_211204.6655	2531
0Safe_safe_UNA3_211217.6668	2764
0Safe_safe_UNA3_211223.6674	1946
0Safe_safe_UNA3_211230.6681	2052
0Safe_safe_UNA3_211231.6682	2420
0Safe_safe_UNA3_211232.6683	5236
0Safe_safe_UNA3_211233.6684	3756
0Safe_safe_UNA3_211242.6693	1617
0Safe_safe_UNA3_211266.6717	3049
0Safe_safe_UNA3_211270.6721	3470
0Safe_safe_UNA3_211271.6722	1607
0Safe_safe_UNA3_211272.6723	2943
0Safe_safe_UNA3_211278.6729	3176
0Safe_safe_UNA3_211290.6741	2550
ABCB11_P1P2_crispri_491	2868
[truncated: 2,924 more rows]

## Sheet: Ricin rep 1
0NONE_na_crispri_205283	1744
0NONE_na_crispri_205288	621
0NONE_na_crispri_205289	929
0NONE_na_crispri_205291	1559
0NONE_na_crispri_205292	927
0NONE_na_crispri_205296	1019
0NONE_na_crispri_205298	1019
0NONE_na_crispri_205299	731
0NONE_na_crispri_205300	1168
0NONE_na_crispri_205301	2250
0NONE_na_crispri_205304	1482
0NONE_na_crispri_205305	1429
0NONE_na_crispri_205308	269
0NONE_na_crispri_205313	1566
0NONE_na_crispri_205320	1226
0NONE_na_crispri_205327	1616
0NONE_na_crispri_205330	963
0NONE_na_crispri_205334	1211
0NONE_na_crispri_205335	1721
0NONE_na_crispri_205336	1809
0NONE_na_crispri_205338	1760
0NONE_na_crispri_205340	662
0NONE_na_crispri_205347	1435
0NONE_na_crispri_205348	994
0NONE_na_crispri_205353	855
0NONE_na_crispri_205363	1453
0NONE_na_crispri_205364	1343
0NONE_na_crispri_205366	1360
0NONE_na_crispri_205367	1279
0NONE_na_crispri_205369	1524
0NONE_na_crispri_205372	1504
0NONE_na_crispri_205375	1327
0NONE_na_crispri_205376	759
0NONE_na_crispri_205393	2456
0NONE_na_crispri_205395	1416
0NONE_na_crispri_205399	1764
0NONE_na_crispri_205401	1212
0NONE_na_crispri_205403	1775
0NONE_na_crispri_205408	1240
0NONE_na_crispri_205415	1585
0NONE_na_crispri_205418	1352
0NONE_na_crispri_205420	773
0NONE_na_crispri_205425	1504
0NONE_na_crispri_205427	1305
0NONE_na_crispri_205436	1118
0NONE_na_crispri_205439	799
0NONE_na_crispri_205442	951
0NONE_na_crispri_205446	596
0NONE_na_crispri_205449	1612
0NONE_na_crispri_205450	557
0NONE_na_crispri_205451	1865
0NONE_na_crispri_205452	1106
0NONE_na_crispri_205458	1736
0NONE_na_crispri_205459	1489
0NONE_na_crispri_205460	1911
0NONE_na_crispri_205463	1466
0NONE_na_crispri_205469	2119
0NONE_na_crispri_205474	198
0NONE_na_crispri_205477	1502
0NONE_na_crispri_205478	1277
0NONE_na_crispri_205479	1644
0NONE_na_crispri_205481	2082
0NONE_na_crispri_205484	1704
0NONE_na_crispri_205498	1597
0NONE_na_crispri_205499	969
0NONE_na_crispri_205512	1193
0NONE_na_crispri_205513	1824
0NONE_na_crispri_205514	963
0NONE_na_crispri_205524	1324
0NONE_na_crispri_205526	1024
0NONE_na_crispri_205530	1034
0NONE_na_crispri_205537	658
0NONE_na_crispri_205540	746
0NONE_na_crispri_205546	8
0NONE_na_crispri_205562	522
0NONE_na_crispri_205563	1543
0NONE_na_crispri_205565	1528
0NONE_na_crispri_205566	1128
0NONE_na_crispri_205569	1162
0NONE_na_crispri_205576	2009
0NONE_na_crispri_205588	1045
0NONE_na_crispri_205596	1342
0NONE_na_crispri_205605	3212
0NONE_na_crispri_205606	2049
0NONE_na_crispri_205615	2529
0NONE_na_crispri_205619	1801
0NONE_na_crispri_205624	342
0NONE_na_crispri_205635	1397
0NONE_na_crispri_205639	1199
0NONE_na_crispri_205640	1265
0NONE_na_crispri_205647	1994
0NONE_na_crispri_205648	756
0NONE_na_crispri_205652	884
0NONE_na_crispri_205654	1363
0NONE_na_crispri_205667	1011
0NONE_na_crispri_205669	2346
0NONE_na_crispri_205670	2288
0NONE_na_crispri_205672	826
0NONE_na_crispri_205689	1734
0NONE_na_crispri_205690	1359
0NONE_na_crispri_205691	759
0NONE_na_crispri_205692	823
0NONE_na_crispri_205695	1783
0NONE_na_crispri_205698	2153
0NONE_na_crispri_205702	1379
0NONE_na_crispri_205704	1039
0NONE_na_crispri_205706	2428
0NONE_na_crispri_205708	2065
0NONE_na_crispri_205709	1253
0NONE_na_crispri_205717	1961
0NONE_na_crispri_205718	1556
0NONE_na_crispri_205723	944
0NONE_na_crispri_205734	650
0NONE_na_crispri_205736	940
0NONE_na_crispri_205739	1059
0NONE_na_crispri_205743	1186
0NONE_na_crispri_205746	1937
0NONE_na_crispri_205749	2281
0NONE_na_crispri_205750	1672
0NONE_na_crispri_205751	656
0NONE_na_crispri_205759	759
0NONE_na_crispri_205764	759
0NONE_na_crispri_205765	1101
0NONE_na_crispri_205769	1076
0NONE_na_crispri_205778	1408
0NONE_na_crispri_205783	1017
0NONE_na_crispri_205784	1190
0NONE_na_crispri_205786	824
0NONE_na_crispri_205787	1058
0NONE_na_crispri_205789	1181
0NONE_na_crispri_205790	2645
0NONE_na_crispri_205806	1302
0NONE_na_crispri_205807	1672
0NONE_na_crispri_205812	3179
0NONE_na_crispri_205813	1022
0NONE_na_crispri_205814	968
0NONE_na_crispri_205823	1940
0NONE_na_crispri_205825	811
0NONE_na_crispri_205827	1149
0NONE_na_crispri_205828	1865
0NONE_na_crispri_205829	1811
0NONE_na_crispri_205830	465
0NONE_na_crispri_205833	1469
0NONE_na_crispri_205840	1129
0NONE_na_crispri_205842	1448
0NONE_na_crispri_205845	1524
0NONE_na_crispri_205855	1493
0NONE_na_crispri_205856	958
0NONE_na_crispri_205865	1071
0NONE_na_crispri_205866	1504
0NONE_na_crispri_205868	1507
0NONE_na_crispri_205874	896
0NONE_na_crispri_205875	2354
0NONE_na_crispri_205881	1164
0NONE_na_crispri_205894	1700
0NONE_na_crispri_205897	1640
0NONE_na_crispri_205901	1542
0NONE_na_crispri_205903	2118
0NONE_na_crispri_205906	1036
0NONE_na_crispri_205907	2002
0NONE_na_crispri_205908	1571
0NONE_na_crispri_205909	651
0NONE_na_crispri_205911	638
0NONE_na_crispri_205917	2103
0NONE_na_crispri_205927	729
0NONE_na_crispri_205933	1819
0NONE_na_crispri_205934	2124
0NONE_na_crispri_205937	1284
0NONE_na_crispri_205947	1285
0NONE_na_crispri_205949	1352
0NONE_na_crispri_205951	1199
0NONE_na_crispri_205955	1764
0NONE_na_crispri_205956	2056
0NONE_na_crispri_205959	970
0NONE_na_crispri_205961	1246
0NONE_na_crispri_205966	1781
0NONE_na_crispri_205973	174
0NONE_na_crispri_205975	1005
0NONE_na_crispri_205981	1954
0NONE_na_crispri_205984	1363
0NONE_na_crispri_205985	1404
0NONE_na_crispri_205989	1574
0NONE_na_crispri_205990	1350
0NONE_na_crispri_205992	1328
0NONE_na_crispri_205993	1228
0NONE_na_crispri_205994	2647
0NONE_na_crispri_206004	1756
0NONE_na_crispri_206010	1081
0NONE_na_crispri_206014	1171
0NONE_na_crispri_206022	1206
0NONE_na_crispri_206024	1195
0NONE_na_crispri_206027	1731
0NONE_na_crispri_206030	851
0NONE_na_crispri_206032	979
0NONE_na_crispri_206037	1556
0NONE_na_crispri_206039	1951
0NONE_na_crispri_206040	1534
0NONE_na_crispri_206047	1009
0NONE_na_crispri_206051	1549
0NONE_na_crispri_206054	1080
0NONE_na_crispri_206056	1279
0NONE_na_crispri_206062	1111
0NONE_na_crispri_206066	1419
0NONE_na_crispri_206077	1321
0NONE_na_crispri_206079	140
0NONE_na_crispri_206086	1090
0NONE_na_crispri_206092	876
0NONE_na_crispri_206100	979
0NONE_na_crispri_206101	1990
0NONE_na_crispri_206104	1271
0NONE_na_crispri_206106	1093
0NONE_na_crispri_206107	984
0NONE_na_crispri_206110	2040
0NONE_na_crispri_206113	1561
0NONE_na_crispri_206114	735
0NONE_na_crispri_206117	962
0NONE_na_crispri_206119	1333
0NONE_na_crispri_206123	30
0NONE_na_crispri_206124	1529
0NONE_na_crispri_206128	741
0NONE_na_crispri_206137	1300
0NONE_na_crispri_206139	2216
0NONE_na_crispri_206148	1535
0NONE_na_crispri_206149	436
0NONE_na_crispri_206158	1239
0NONE_na_crispri_206166	1483
0NONE_na_crispri_206167	1541
0NONE_na_crispri_206170	915
0NONE_na_crispri_206173	1897
0NONE_na_crispri_206175	1214
0NONE_na_crispri_206177	1008
0NONE_na_crispri_206180	1300
0NONE_na_crispri_206188	942
0NONE_na_crispri_206189	735
0NONE_na_crispri_206190	1542
0NONE_na_crispri_206191	2243
0NONE_na_crispri_206193	2795
0NONE_na_crispri_206199	1082
0NONE_na_crispri_206212	1241
0NONE_na_crispri_206218	1365
0NONE_na_crispri_206219	555
0NONE_na_crispri_206220	1800
0NONE_na_crispri_206231	1167
0NONE_na_crispri_206233	1554
0NONE_na_crispri_206244	651
0NONE_na_crispri_206245	1975
0NONE_na_crispri_206246	1321
0NONE_na_crispri_206251	1040
0NONE_na_crispri_206252	2661
0NONE_na_crispri_206253	1432
0NONE_na_crispri_206259	1413
0NONE_na_crispri_206262	1580
0NONE_na_crispri_206263	1988
0NONE_na_crispri_206264	2294
0NONE_na_crispri_206274	1126
0NONE_na_crispri_206276	1061
0NONE_na_crispri_206281	1410
0NONE_na_crispri_206284	1844
0NONE_na_crispri_206285	1385
0NONE_na_crispri_206291	976
0NONE_na_crispri_206292	1753
0NONE_na_crispri_206293	2160
0NONE_na_crispri_206294	1312
0NONE_na_crispri_206296	2105
0NONE_na_crispri_206298	1488
0NONE_na_crispri_206307	1275
0NONE_na_crispri_206310	1605
0NONE_na_crispri_206312	654
0NONE_na_crispri_206317	1295
0NONE_na_crispri_206319	2287
0NONE_na_crispri_206321	1413
0NONE_na_crispri_206324	1739
0NONE_na_crispri_206331	1146
0NONE_na_crispri_206332	1091
0NONE_na_crispri_206335	1470
0NONE_na_crispri_206336	786
0NONE_na_crispri_206338	2113
0NONE_na_crispri_206345	1176
0NONE_na_crispri_206346	1440
0NONE_na_crispri_206347	1466
0NONE_na_crispri_206351	1121
0NONE_na_crispri_206353	1467
0NONE_na_crispri_206355	2297
0NONE_na_crispri_206358	1602
0NONE_na_crispri_206361	1771
0NONE_na_crispri_206364	2018
0NONE_na_crispri_206369	678
0NONE_na_crispri_206370	2107
0NONE_na_crispri_206371	1256
0NONE_na_crispri_206373	2450
0NONE_na_crispri_206374	1794
0NONE_na_crispri_206378	877
0NONE_na_crispri_206379	1636
0NONE_na_crispri_206383	2062
0NONE_na_crispri_206388	1491
0NONE_na_crispri_206390	2150
0NONE_na_crispri_206392	1309
0NONE_na_crispri_206397	68
0NONE_na_crispri_206398	2183
0NONE_na_crispri_206412	883
0NONE_na_crispri_206417	1720
0NONE_na_crispri_206425	1376
0NONE_na_crispri_206436	1832
0NONE_na_crispri_206438	1808
0NONE_na_crispri_206439	1490
0NONE_na_crispri_206443	1260
0NONE_na_crispri_206444	1294
0NONE_na_crispri_206449	1524
0NONE_na_crispri_206453	1374
0NONE_na_crispri_206454	2198
0NONE_na_crispri_206457	1141
0NONE_na_crispri_206459	1254
0NONE_na_crispri_206460	1570
0NONE_na_crispri_206462	1103
0NONE_na_crispri_206463	668
0NONE_na_crispri_206465	1629
0NONE_na_crispri_206466	1877
0NONE_na_crispri_206475	1954
0NONE_na_crispri_206480	1438
0NONE_na_crispri_206481	2547
0NONE_na_crispri_206484	829
0NONE_na_crispri_206485	1989
0NONE_na_crispri_206486	1680
0NONE_na_crispri_206493	1692
0NONE_na_crispri_206496	1350
0NONE_na_crispri_206500	1162
0NONE_na_crispri_206505	635
0NONE_na_crispri_206506	232
0NONE_na_crispri_206507	1635
0NONE_na_crispri_206514	936
0NONE_na_crispri_206517	1955
0NONE_na_crispri_206520	695
0NONE_na_crispri_206524	954
0NONE_na_crispri_206530	1173
0NONE_na_crispri_206534	1618
0NONE_na_crispri_206537	1566
0NONE_na_crispri_206542	1407
0NONE_na_crispri_206549	1680
0NONE_na_crispri_206555	845
0NONE_na_crispri_206556	1712
0NONE_na_crispri_206558	1348
0NONE_na_crispri_206560	1062
0NONE_na_crispri_206562	2483
0NONE_na_crispri_206567	1369
0NONE_na_crispri_206573	1364
0NONE_na_crispri_206575	1060
0NONE_na_crispri_206579	1767
0NONE_na_crispri_206583	943
0NONE_na_crispri_206584	1371
0NONE_na_crispri_206585	2191
0NONE_na_crispri_206592	1817
0NONE_na_crispri_206597	1701
0NONE_na_crispri_206598	2002
0NONE_na_crispri_206607	1732
0NONE_na_crispri_206611	47
0NONE_na_crispri_206613	1213
0NONE_na_crispri_206622	1493
0NONE_na_crispri_206625	1263
0NONE_na_crispri_206633	755
0NONE_na_crispri_206634	1469
0NONE_na_crispri_206639	2145
0NONE_na_crispri_206642	882
0NONE_na_crispri_206647	1224
0NONE_na_crispri_206652	1263
0NONE_na_crispri_206657	1161
0NONE_na_crispri_206659	700
0NONE_na_crispri_206667	1201
0NONE_na_crispri_206670	2105
0NONE_na_crispri_206675	1523
0NONE_na_crispri_206681	1595
0NONE_na_crispri_206683	1294
0NONE_na_crispri_206694	758
0NONE_na_crispri_206695	1897
0NONE_na_crispri_206697	860
0NONE_na_crispri_206699	582
0NONE_na_crispri_206701	1088
0NONE_na_crispri_206702	907
0NONE_na_crispri_206704	1086
0NONE_na_crispri_206709	1139
0NONE_na_crispri_206710	667
0NONE_na_crispri_206723	1140
0NONE_na_crispri_206728	762
0NONE_na_crispri_206729	1477
0NONE_na_crispri_206730	1215
0NONE_na_crispri_206741	1525
0NONE_na_crispri_206754	1660
0NONE_na_crispri_206756	261
0NONE_na_crispri_206757	756
0NONE_na_crispri_206760	1249
0NONE_na_crispri_206764	904
0NONE_na_crispri_206765	1647
0NONE_na_crispri_206766	1334
0NONE_na_crispri_206767	1287
0NONE_na_crispri_206773	1087
0NONE_na_crispri_206774	1059
0NONE_na_crispri_206777	1159
0NONE_na_crispri_206778	1252
0NONE_na_crispri_206781	1064
0NONE_na_crispri_206782	156
0NONE_na_crispri_206784	836
0NONE_na_crispri_206787	565
0NONE_na_crispri_206806	1316
0NONE_na_crispri_206809	1513
0NONE_na_crispri_206812	1310
0NONE_na_crispri_206815	1214
0NONE_na_crispri_206821	1629
0NONE_na_crispri_206822	1888
0NONE_na_crispri_206823	1212
0NONE_na_crispri_206824	2792
0NONE_na_crispri_206825	754
0NONE_na_crispri_206826	476
0NONE_na_crispri_206829	2003
0NONE_na_crispri_206831	1280
0NONE_na_crispri_206834	1349
0NONE_na_crispri_206840	1648
0NONE_na_crispri_206844	2445
0NONE_na_crispri_206848	1230
0NONE_na_crispri_206852	750
0NONE_na_crispri_206854	2427
0NONE_na_crispri_206856	1139
0NONE_na_crispri_206860	1548
0NONE_na_crispri_206861	2003
0NONE_na_crispri_206862	1554
0NONE_na_crispri_206865	1907
0NONE_na_crispri_206866	1567
0NONE_na_crispri_206869	992
0NONE_na_crispri_206872	2419
0NONE_na_crispri_206878	627
0NONE_na_crispri_206879	1347
0NONE_na_crispri_206882	2550
0NONE_na_crispri_206885	1131
0NONE_na_crispri_206897	1511
0NONE_na_crispri_206903	2113
0NONE_na_crispri_206904	1423
0NONE_na_crispri_206906	1477
0NONE_na_crispri_206909	1142
0NONE_na_crispri_206910	1884
0NONE_na_crispri_206914	1885
0NONE_na_crispri_206917	412
0NONE_na_crispri_206919	957
0NONE_na_crispri_206920	1378
0NONE_na_crispri_206923	1106
0NONE_na_crispri_206926	611
0NONE_na_crispri_206929	709
0NONE_na_crispri_206933	940
0NONE_na_crispri_206935	686
0NONE_na_crispri_206936	1303
0NONE_na_crispri_206938	1269
0NONE_na_crispri_206945	1539
0NONE_na_crispri_206946	1838
0NONE_na_crispri_206947	1000
0NONE_na_crispri_206949	1884
0NONE_na_crispri_206954	2316
0NONE_na_crispri_206956	1194
0NONE_na_crispri_206958	1717
0NONE_na_crispri_206962	1803
0NONE_na_crispri_206963	1370
0NONE_na_crispri_206965	1252
0NONE_na_crispri_206972	1431
0NONE_na_crispri_206976	1241
0NONE_na_crispri_206985	1637
0NONE_na_crispri_206991	996
0NONE_na_crispri_206992	3185
0NONE_na_crispri_206993	1045
0NONE_na_crispri_207005	1052
0NONE_na_crispri_207007	1112
0NONE_na_crispri_207008	1238
0NONE_na_crispri_207016	2506
0NONE_na_crispri_207019	1389
0NONE_na_crispri_207021	1836
0NONE_na_crispri_207022	1255
0NONE_na_crispri_207029	436
0NONE_na_crispri_207043	1260
0NONE_na_crispri_207044	2540
0NONE_na_crispri_207053	1453
0NONE_na_crispri_207059	499
0NONE_na_crispri_207063	1435
0NONE_na_crispri_207069	1885
0NONE_na_crispri_207070	1461
0NONE_na_crispri_207074	2138
0NONE_na_crispri_207080	735
0NONE_na_crispri_207084	1058
0NONE_na_crispri_207090	1472
0NONE_na_crispri_207103	1796
0NONE_na_crispri_207108	1511
0NONE_na_crispri_207110	1664
0NONE_na_crispri_207118	1256
0NONE_na_crispri_207119	2109
0NONE_na_crispri_207126	1457
0NONE_na_crispri_207128	900
0NONE_na_crispri_207131	1103
0NONE_na_crispri_207132	1352
0NONE_na_crispri_207140	1414
0NONE_na_crispri_207141	1183
0NONE_na_crispri_207144	1120
0NONE_na_crispri_207147	709
0NONE_na_crispri_207149	1283
0NONE_na_crispri_207154	683
0NONE_na_crispri_207158	1834
0NONE_na_crispri_207160	789
0NONE_na_crispri_207162	1959
0NONE_na_crispri_207163	1458
0NONE_na_crispri_207173	1418
0NONE_na_crispri_207183	1598
0NONE_na_crispri_207185	1888
0NONE_na_crispri_207186	1138
0NONE_na_crispri_207187	938
0NONE_na_crispri_207192	1893
0NONE_na_crispri_207196	1410
0NONE_na_crispri_207200	1138
0NONE_na_crispri_207203	1660
0NONE_na_crispri_207204	849
0NONE_na_crispri_207206	1759
0NONE_na_crispri_207208	1381
0NONE_na_crispri_207211	2145
0NONE_na_crispri_207212	1075
0NONE_na_crispri_207213	1287
0NONE_na_crispri_207214	1121
0NONE_na_crispri_207215	651
0NONE_na_crispri_207216	869
0NONE_na_crispri_207218	917
0NONE_na_crispri_207219	2010
0NONE_na_crispri_207222	926
0NONE_na_crispri_207224	1260
0NONE_na_crispri_207225	1726
0NONE_na_crispri_207226	993
0NONE_na_crispri_207228	595
0NONE_na_crispri_207230	1127
0NONE_na_crispri_207239	1587
0NONE_na_crispri_207245	2119
0NONE_na_crispri_207257	1011
0NONE_na_crispri_207271	947
0NONE_na_crispri_207272	1362
0NONE_na_crispri_207273	2251
0NONE_na_crispri_207274	473
0NONE_na_crispri_207282	1523
0NONE_na_crispri_207289	944
0NONE_na_crispri_207297	1688
0NONE_na_crispri_207300	1317
0NONE_na_crispri_207302	683
0NONE_na_crispri_207305	1313
0NONE_na_crispri_207318	2378
0NONE_na_crispri_207319	607
0NONE_na_crispri_207330	693
0NONE_na_crispri_207334	2201
0NONE_na_crispri_207338	830
0NONE_na_crispri_207339	1331
0NONE_na_crispri_207348	894
0NONE_na_crispri_207351	1388
0NONE_na_crispri_207354	1025
0NONE_na_crispri_207355	2042
0NONE_na_crispri_207356	1040
0NONE_na_crispri_207363	739
0NONE_na_crispri_207366	1471
0NONE_na_crispri_207370	1670
0NONE_na_crispri_207371	1077
0NONE_na_crispri_207372	1716
0NONE_na_crispri_207373	1513
0NONE_na_crispri_207375	1611
0NONE_na_crispri_207389	1641
0NONE_na_crispri_207390	1487
0NONE_na_crispri_207394	1527
0NONE_na_crispri_207395	2408
0NONE_na_crispri_207400	1341
0NONE_na_crispri_207406	1774
0NONE_na_crispri_207408	1141
0NONE_na_crispri_207413	1629
0NONE_na_crispri_207427	1188
0NONE_na_crispri_207428	1331
0NONE_na_crispri_207431	1254
0NONE_na_crispri_207432	943
0NONE_na_crispri_207434	1421
0NONE_na_crispri_207435	1942
0NONE_na_crispri_207437	1381
0NONE_na_crispri_207444	1250
0NONE_na_crispri_207450	2543
0NONE_na_crispri_207452	668
0NONE_na_crispri_207457	1373
0NONE_na_crispri_207459	1573
0NONE_na_crispri_207461	2316
0NONE_na_crispri_207462	1155
0NONE_na_crispri_207468	1048
0NONE_na_crispri_207471	1217
0NONE_na_crispri_207475	1178
0NONE_na_crispri_207479	1956
0NONE_na_crispri_207482	954
0NONE_na_crispri_207483	994
0NONE_na_crispri_207487	1327
0NONE_na_crispri_207489	1359
0NONE_na_crispri_207493	1223
0NONE_na_crispri_207494	1198
0NONE_na_crispri_207508	758
0NONE_na_crispri_207510	1439
0NONE_na_crispri_207511	1401
0NONE_na_crispri_207512	1685
0NONE_na_crispri_207514	1589
0NONE_na_crispri_207516	477
0NONE_na_crispri_207522	460
0NONE_na_crispri_207534	836
0NONE_na_crispri_207542	1710
0NONE_na_crispri_207553	641
0NONE_na_crispri_207555	1586
0NONE_na_crispri_207560	1589
0NONE_na_crispri_207566	1205
0NONE_na_crispri_207570	1042
0NONE_na_crispri_207571	1761
0NONE_na_crispri_207576	1714
0NONE_na_crispri_207582	1539
0NONE_na_crispri_207589	776
0NONE_na_crispri_207590	1061
0NONE_na_crispri_207597	1028
0NONE_na_crispri_207599	754
0NONE_na_crispri_207602	1789
0NONE_na_crispri_207608	799
0NONE_na_crispri_207613	1308
0NONE_na_crispri_207614	1923
0NONE_na_crispri_207615	1262
0NONE_na_crispri_207617	1182
0NONE_na_crispri_207618	861
0NONE_na_crispri_207627	2057
0NONE_na_crispri_207631	1339
0NONE_na_crispri_207632	1442
0NONE_na_crispri_207636	1271
0NONE_na_crispri_207637	1271
0NONE_na_crispri_207639	947
0NONE_na_crispri_207640	824
0NONE_na_crispri_207641	408
0NONE_na_crispri_207642	1407
0NONE_na_crispri_207643	1616
0NONE_na_crispri_207644	2195
0NONE_na_crispri_207646	1012
0NONE_na_crispri_207647	2952
0NONE_na_crispri_207649	831
0NONE_na_crispri_207655	1549
0NONE_na_crispri_207658	988
0NONE_na_crispri_207660	798
0NONE_na_crispri_207662	1136
0NONE_na_crispri_207669	1473
0NONE_na_crispri_207672	1554
0NONE_na_crispri_207673	1334
0NONE_na_crispri_207679	276
0NONE_na_crispri_207684	2009
0NONE_na_crispri_207694	990
0NONE_na_crispri_207696	1176
0NONE_na_crispri_207704	1576
0NONE_na_crispri_207709	1153
0NONE_na_crispri_207710	1478
0NONE_na_crispri_207711	2108
0NONE_na_crispri_207721	244
0NONE_na_crispri_207728	1226
0NONE_na_crispri_207740	1644
0NONE_na_crispri_207743	1358
0NONE_na_crispri_207744	304
0NONE_na_crispri_207747	1138
0NONE_na_crispri_207753	531
0NONE_na_crispri_207757	1546
0NONE_na_crispri_207771	728
0NONE_na_crispri_207774	384
0NONE_na_crispri_207777	1564
0NONE_na_crispri_207778	908
0NONE_na_crispri_207780	1313
0NONE_na_crispri_207786	1990
0NONE_na_crispri_207788	2046
0NONE_na_crispri_207789	1318
0NONE_na_crispri_207793	846
0NONE_na_crispri_207800	1941
0NONE_na_crispri_207803	496
0NONE_na_crispri_207804	1861
0NONE_na_crispri_207805	1514
0NONE_na_crispri_207809	574
0NONE_na_crispri_207813	1106
0NONE_na_crispri_207814	2121
0NONE_na_crispri_207817	1384
0NONE_na_crispri_207819	857
0NONE_na_crispri_207820	542
0NONE_na_crispri_207821	1115
0NONE_na_crispri_207824	648
0NONE_na_crispri_207830	1338
0NONE_na_crispri_207833	1580
0NONE_na_crispri_207834	2180
0NONE_na_crispri_207837	1235
0NONE_na_crispri_207838	1166
0NONE_na_crispri_207839	1002
0NONE_na_crispri_207843	922
0NONE_na_crispri_207844	2151
0NONE_na_crispri_207845	1200
0NONE_na_crispri_207852	1098
0NONE_na_crispri_207853	124
0NONE_na_crispri_207857	1373
0NONE_na_crispri_207859	1087
0NONE_na_crispri_207870	1489
0NONE_na_crispri_207874	1350
0NONE_na_crispri_207875	732
0NONE_na_crispri_207876	1381
0NONE_na_crispri_207878	1016
0NONE_na_crispri_207882	1965
0NONE_na_crispri_207889	1518
0NONE_na_crispri_207891	1256
0NONE_na_crispri_207893	1508
0NONE_na_crispri_207897	1332
0NONE_na_crispri_207900	1062
0NONE_na_crispri_207902	856
0NONE_na_crispri_207909	1606
0NONE_na_crispri_207912	2705
0NONE_na_crispri_207913	922
0NONE_na_crispri_207914	1471
0NONE_na_crispri_207915	1813
0NONE_na_crispri_207916	198
0NONE_na_crispri_207917	1168
0NONE_na_crispri_207918	1514
0NONE_na_crispri_207928	1288
0NONE_na_crispri_207931	2638
0NONE_na_crispri_207937	1185
0NONE_na_crispri_207942	1496
0NONE_na_crispri_207944	1510
0NONE_na_crispri_207945	1174
0NONE_na_crispri_207946	851
0NONE_na_crispri_207948	1193
0NONE_na_crispri_207952	1002
0NONE_na_crispri_207956	774
0NONE_na_crispri_207958	1134
0NONE_na_crispri_207960	1253
0NONE_na_crispri_207961	1922
0NONE_na_crispri_207971	1430
0NONE_na_crispri_207975	1253
0NONE_na_crispri_207977	1955
0NONE_na_crispri_207978	1458
0NONE_na_crispri_207982	484
0NONE_na_crispri_207985	2236
0NONE_na_crispri_207991	1778
0NONE_na_crispri_207995	873
0NONE_na_crispri_208000	1235
0NONE_na_crispri_208003	2552
0NONE_na_crispri_208004	1064
0NONE_na_crispri_208011	1654
0NONE_na_crispri_208016	852
0NONE_na_crispri_208018	1323
0NONE_na_crispri_208019	2491
0NONE_na_crispri_208020	1084
0NONE_na_crispri_208027	1351
0NONE_na_crispri_208030	1373
0NONE_na_crispri_208040	1593
0NONE_na_crispri_208042	2769
0NONE_na_crispri_208044	1561
0NONE_na_crispri_208045	962
0NONE_na_crispri_208046	2053
0NONE_na_crispri_208047	1404
0NONE_na_crispri_208050	1086
0NONE_na_crispri_208059	1285
0NONE_na_crispri_208060	709
0NONE_na_crispri_208063	892
0NONE_na_crispri_208068	481
0NONE_na_crispri_208069	1219
0NONE_na_crispri_208071	800
0NONE_na_crispri_208072	1639
0NONE_na_crispri_208081	1691
0NONE_na_crispri_208082	1008
0NONE_na_crispri_208083	2139
0NONE_na_crispri_208085	2240
0NONE_na_crispri_208087	1736
0NONE_na_crispri_208091	1982
0NONE_na_crispri_208092	2227
0NONE_na_crispri_208093	130
0NONE_na_crispri_208103	1484
0NONE_na_crispri_208104	1
0NONE_na_crispri_208107	816
0NONE_na_crispri_208110	2154
0NONE_na_crispri_208118	1507
0NONE_na_crispri_208120	1216
0NONE_na_crispri_208123	765
0NONE_na_crispri_208127	1621
0NONE_na_crispri_208131	1079
0NONE_na_crispri_208135	997
0NONE_na_crispri_208138	1465
0NONE_na_crispri_208139	1736
0NONE_na_crispri_208140	1819
0NONE_na_crispri_208142	1204
0NONE_na_crispri_208174	952
0NONE_na_crispri_208175	1399
0NONE_na_crispri_208177	894
0NONE_na_crispri_208180	984
0NONE_na_crispri_208181	1593
0NONE_na_crispri_208184	1172
0NONE_na_crispri_208186	1434
0NONE_na_crispri_208191	1036
0NONE_na_crispri_208198	1043
0NONE_na_crispri_208202	1417
0NONE_na_crispri_208206	537
0NONE_na_crispri_208212	739
0NONE_na_crispri_208219	1742
0NONE_na_crispri_208224	1261
0NONE_na_crispri_208229	2798
0NONE_na_crispri_208236	648
0NONE_na_crispri_208237	817
0NONE_na_crispri_208241	1387
0NONE_na_crispri_208255	1527
0NONE_na_crispri_208259	1168
0NONE_na_crispri_208261	3123
0NONE_na_crispri_208265	1283
0NONE_na_crispri_208267	1165
0NONE_na_crispri_208277	2400
0NONE_na_crispri_208278	1726
0NONE_na_crispri_208279	246
0NONE_na_crispri_208290	2015
0NONE_na_crispri_208294	1127
0NONE_na_crispri_208296	1417
0NONE_na_crispri_208297	2087
0NONE_na_crispri_208301	1220
0NONE_na_crispri_208308	1465
0NONE_na_crispri_208310	1278
0NONE_na_crispri_208313	1566
0NONE_na_crispri_208321	1750
0NONE_na_crispri_208330	1003
0NONE_na_crispri_208331	2741
0NONE_na_crispri_208336	1089
0NONE_na_crispri_208339	1160
0NONE_na_crispri_208342	453
0NONE_na_crispri_208343	1835
0NONE_na_crispri_208345	2486
0NONE_na_crispri_208351	1154
0NONE_na_crispri_208371	1161
0NONE_na_crispri_208377	1732
0NONE_na_crispri_208381	1104
0NONE_na_crispri_208383	824
0NONE_na_crispri_208385	2192
0NONE_na_crispri_208386	1057
0NONE_na_crispri_208396	135
0NONE_na_crispri_208399	1211
0NONE_na_crispri_208403	1187
0NONE_na_crispri_208409	1178
0NONE_na_crispri_208417	1595
0NONE_na_crispri_208429	760
0NONE_na_crispri_208434	2010
0NONE_na_crispri_208440	2481
0NONE_na_crispri_208446	1308
0NONE_na_crispri_208449	1723
0NONE_na_crispri_208455	2481
0NONE_na_crispri_208457	1503
0NONE_na_crispri_208463	1590
0NONE_na_crispri_208464	1717
0NONE_na_crispri_208465	2832
0NONE_na_crispri_208471	1785
0NONE_na_crispri_208473	1009
0NONE_na_crispri_208476	909
0NONE_na_crispri_208482	1244
0NONE_na_crispri_208485	989
0NONE_na_crispri_208487	1514
0NONE_na_crispri_208488	936
0NONE_na_crispri_208490	1268
0NONE_na_crispri_208492	1008
0NONE_na_crispri_208493	900
0NONE_na_crispri_208495	1003
0NONE_na_crispri_208500	1788
0NONE_na_crispri_208505	1239
0NONE_na_crispri_208514	1371
0NONE_na_crispri_208515	1420
0NONE_na_crispri_208518	797
0NONE_na_crispri_208521	721
0NONE_na_crispri_208533	182
0NONE_na_crispri_208536	1179
0NONE_na_crispri_208543	2540
0NONE_na_crispri_208546	1603
0NONE_na_crispri_208547	1865
0NONE_na_crispri_208548	353
0NONE_na_crispri_208558	1712
0NONE_na_crispri_208559	1674
0NONE_na_crispri_208560	4187
0NONE_na_crispri_208561	1629
0NONE_na_crispri_208564	2467
0NONE_na_crispri_208565	747
0NONE_na_crispri_208569	1314
0NONE_na_crispri_208572	1435
0NONE_na_crispri_208575	728
0NONE_na_crispri_208578	1346
0NONE_na_crispri_208588	1260
0NONE_na_crispri_208589	1369
0NONE_na_crispri_208590	1903
0NONE_na_crispri_208608	6
0NONE_na_crispri_208610	2109
0NONE_na_crispri_208615	1972
0NONE_na_crispri_208616	1169
0NONE_na_crispri_208618	2499
0NONE_na_crispri_208619	1547
0NONE_na_crispri_208621	1545
0NONE_na_crispri_208627	1279
0NONE_na_crispri_208629	1239
0NONE_na_crispri_208633	1628
0NONE_na_crispri_208637	906
0NONE_na_crispri_208640	2978
0NONE_na_crispri_208644	1799
0NONE_na_crispri_208646	1369
0NONE_na_crispri_208650	2467
0NONE_na_crispri_208652	952
0NONE_na_crispri_208659	791
0NONE_na_crispri_208660	2049
0NONE_na_crispri_208662	2218
0NONE_na_crispri_208665	1951
0NONE_na_crispri_208671	2301
0NONE_na_crispri_208678	1952
0NONE_na_crispri_208681	1032
0NONE_na_crispri_208685	2022
0NONE_na_crispri_208687	2093
0NONE_na_crispri_208689	1622
0NONE_na_crispri_208691	853
0NONE_na_crispri_208694	61
0NONE_na_crispri_208700	1269
0NONE_na_crispri_208701	1364
0NONE_na_crispri_208702	1980
0NONE_na_crispri_208703	1213
0NONE_na_crispri_208707	1476
0NONE_na_crispri_208708	1489
0NONE_na_crispri_208715	1101
0NONE_na_crispri_208717	1280
0NONE_na_crispri_208720	1083
0NONE_na_crispri_208724	1131
0NONE_na_crispri_208734	1327
0NONE_na_crispri_208740	1300
0NONE_na_crispri_208747	928
0NONE_na_crispri_208750	1210
0NONE_na_crispri_208753	1121
0NONE_na_crispri_208756	910
0NONE_na_crispri_208758	914
0NONE_na_crispri_208763	897
0NONE_na_crispri_208766	1696
0NONE_na_crispri_208776	1520
0NONE_na_crispri_208777	1138
0NONE_na_crispri_208791	606
0NONE_na_crispri_208796	2023
0NONE_na_crispri_208799	2422
0NONE_na_crispri_208803	647
0NONE_na_crispri_208804	1316
0NONE_na_crispri_208805	2203
0NONE_na_crispri_208808	1299
0NONE_na_crispri_208810	1450
0NONE_na_crispri_208812	1327
0NONE_na_crispri_208813	1633
0NONE_na_crispri_208818	1283
0NONE_na_crispri_208819	1377
0NONE_na_crispri_208833	574
0NONE_na_crispri_208834	909
0NONE_na_crispri_208837	1171
0NONE_na_crispri_208839	1592
0NONE_na_crispri_208842	1698
0NONE_na_crispri_208843	658
0NONE_na_crispri_208849	1346
0NONE_na_crispri_208850	538
0NONE_na_crispri_208852	1282
0NONE_na_crispri_208859	1516
0NONE_na_crispri_208861	1074
0NONE_na_crispri_208871	1527
0NONE_na_crispri_208874	1017
0NONE_na_crispri_208877	956
0NONE_na_crispri_208882	1034
0NONE_na_crispri_208901	1465
0NONE_na_crispri_208902	1272
0NONE_na_crispri_208903	955
0NONE_na_crispri_208904	2045
0NONE_na_crispri_208906	1409
0NONE_na_crispri_208907	974
0NONE_na_crispri_208909	986
0NONE_na_crispri_208910	1794
0NONE_na_crispri_208912	1277
0NONE_na_crispri_208914	705
0NONE_na_crispri_208918	801
0NONE_na_crispri_208926	1859
0NONE_na_crispri_208927	2290
0NONE_na_crispri_208929	1232
0NONE_na_crispri_208931	75
0NONE_na_crispri_208934	106
0NONE_na_crispri_208936	1918
0NONE_na_crispri_208938	971
0NONE_na_crispri_208944	1417
0NONE_na_crispri_208954	1039
0NONE_na_crispri_208958	926
0NONE_na_crispri_208963	1694
0NONE_na_crispri_208969	1045
0NONE_na_crispri_208974	1890
0NONE_na_crispri_208977	1154
0NONE_na_crispri_208978	1146
0NONE_na_crispri_208992	1477
0NONE_na_crispri_208996	1452
0NONE_na_crispri_209000	1911
0NONE_na_crispri_209004	2193
0NONE_na_crispri_209006	2347
0NONE_na_crispri_209014	841
0NONE_na_crispri_209016	1545
0NONE_na_crispri_209018	1123
0NONE_na_crispri_209021	978
0NONE_na_crispri_209022	1067
0NONE_na_crispri_209027	1016
0NONE_na_crispri_209030	1296
0NONE_na_crispri_209033	1546
0NONE_na_crispri_209034	1525
0NONE_na_crispri_209036	2563
0NONE_na_crispri_209038	1400
0NONE_na_crispri_209042	1301
0NONE_na_crispri_209064	1668
0NONE_na_crispri_209065	1444
0NONE_na_crispri_209068	1087
0Safe_safe_ACOC_204555.4506	2146
0Safe_safe_ACOC_204560.4511	3148
0Safe_safe_ACOC_204571.4522	2087
0Safe_safe_ACOC_204575.4526	867
0Safe_safe_ACOC_204590.4541	2145
0Safe_safe_ACOC_204599.4550	1406
0Safe_safe_ACOC_204608.4559	1213
0Safe_safe_ACOC_204611.4562	2248
0Safe_safe_ACOC_204625.4576	1912
0Safe_safe_ACOC_204627.4578	2238
0Safe_safe_ACOC_204629.4580	1234
0Safe_safe_ACOC_204632.4583	2564
0Safe_safe_ACOC_204663.4614	2347
0Safe_safe_ACOC_204669.4620	1125
0Safe_safe_ACOC_204672.4623	2123
0Safe_safe_ACOC_204678.4629	143
0Safe_safe_ACOC_204679.4630	1760
0Safe_safe_ACOC_204680.4631	2447
0Safe_safe_ACOC_204684.4635	3266
0Safe_safe_ACOC_204715.4666	1083
0Safe_safe_ACOC_204720.4671	2329
0Safe_safe_ACOC_204731.4682	1372
0Safe_safe_ACOC_204737.4688	2056
0Safe_safe_ACOC_204740.4691	2208
0Safe_safe_ACOC_204745.4696	2081
0Safe_safe_ACOC_204746.4697	1352
0Safe_safe_ACOC_204749.4700	1218
0Safe_safe_ACOC_204764.4715	1647
0Safe_safe_ACOC_204770.4721	1986
0Safe_safe_ACOC_204772.4723	3424
0Safe_safe_ACOC_204785.4736	1514
0Safe_safe_ACOC_204788.4739	2937
0Safe_safe_ACOC_204790.4741	2221
0Safe_safe_ACOC_204800.4751	1754
0Safe_safe_ACOC_204802.4753	1662
0Safe_safe_ACOC_204808.4759	1315
0Safe_safe_ACOC_204809.4760	2635
0Safe_safe_ACOC_204825.4776	2215
0Safe_safe_ACOC_204827.4778	1569
0Safe_safe_ACOC_204850.4801	1582
0Safe_safe_ACOC_204854.4805	1871
0Safe_safe_ACOC_204872.4823	938
0Safe_safe_ACOC_204876.4827	1995
0Safe_safe_ACOC_204877.4828	1972
0Safe_safe_ACOC_204887.4838	1604
0Safe_safe_ACOC_204889.4840	1519
0Safe_safe_ACOC_204891.4842	1496
0Safe_safe_ACOC_204905.4856	1624
0Safe_safe_ACOC_204906.4857	1335
0Safe_safe_ACOC_204910.4861	1336
0Safe_safe_ACOC_204921.4872	2045
0Safe_safe_ACOC_204930.4881	1710
0Safe_safe_ACOC_204934.4885	1265
0Safe_safe_ACOC_204937.4888	1371
0Safe_safe_ACOC_204941.4892	1510
0Safe_safe_ACOC_204947.4898	1615
0Safe_safe_ACOC_204950.4901	1757
0Safe_safe_ACOC_204958.4909	1269
0Safe_safe_ACOC_204960.4911	2076
0Safe_safe_ACOC_204964.4915	2394
0Safe_safe_ACOC_204965.4916	2232
0Safe_safe_ACOC_204975.4926	2031
0Safe_safe_ACOC_205005.4956	1705
0Safe_safe_ACOC_205024.4975	2254
0Safe_safe_ACOC_205030.4981	1872
0Safe_safe_ACOC_205036.4987	1738
0Safe_safe_ACOC_205038.4989	1393
0Safe_safe_ACOC_205049.5000	1310
0Safe_safe_ACOC_205050.5001	3363
0Safe_safe_ACOC_205053.5004	2694
0Safe_safe_ACOC_205060.5011	1318
0Safe_safe_ACOC_205064.5015	1168
0Safe_safe_ACOC_205065.5016	2846
0Safe_safe_ACOC_205066.5017	2034
0Safe_safe_ACOC_205072.5023	1766
0Safe_safe_ACOC_205080.5031	1420
0Safe_safe_ACOC_205084.5035	1786
0Safe_safe_ACOC_205094.5045	1230
0Safe_safe_ACOC_205100.5051	1540
0Safe_safe_ACOC_205107.5058	1520
0Safe_safe_ACOC_205109.5060	1568
0Safe_safe_ACOC_205129.5080	1357
0Safe_safe_ACOC_205133.5084	1601
0Safe_safe_ACOC_205135.5086	1503
0Safe_safe_ACOC_205137.5088	2357
0Safe_safe_ACOC_205139.5090	1799
0Safe_safe_ACOC_205142.5093	2665
0Safe_safe_ACOC_205144.5095	2284
0Safe_safe_ACOC_205150.5101	2422
0Safe_safe_ACOC_205162.5113	1462
0Safe_safe_ACOC_205163.5114	2272
0Safe_safe_ACOC_205174.5125	2657
0Safe_safe_ACOC_205189.5140	2228
0Safe_safe_ACOC_205192.5143	1593
0Safe_safe_ACOC_205196.5147	2124
0Safe_safe_ACOC_205201.5152	1873
0Safe_safe_ACOC_205211.5162	2510
0Safe_safe_ACOC_205221.5172	2425
0Safe_safe_ACOC_205237.5188	2118
0Safe_safe_ACOC_205243.5194	1404
0Safe_safe_ACOC_205250.5201	1573
0Safe_safe_ACOC_205261.5212	1833
0Safe_safe_ACOC_205265.5216	2185
0Safe_safe_ACOC_205270.5221	1270
0Safe_safe_ACOC_205272.5223	2060
0Safe_safe_ACOC_205278.5229	1742
0Safe_safe_ACOC_205285.5236	1502
0Safe_safe_ACOC_205297.5248	1915
0Safe_safe_ACOC_205299.5250	2368
0Safe_safe_DTKP_205310.5261	1336
0Safe_safe_DTKP_205314.5265	1677
0Safe_safe_DTKP_205318.5269	1483
0Safe_safe_DTKP_205319.5270	2715
0Safe_safe_DTKP_205324.5275	2330
0Safe_safe_DTKP_205325.5276	2167
0Safe_safe_DTKP_205340.5291	2575
0Safe_safe_DTKP_205341.5292	2042
0Safe_safe_DTKP_205342.5293	1684
0Safe_safe_DTKP_205343.5294	885
0Safe_safe_DTKP_205348.5299	960
0Safe_safe_DTKP_205368.5319	1218
0Safe_safe_DTKP_205373.5324	1972
0Safe_safe_DTKP_205380.5331	2258
0Safe_safe_DTKP_205390.5341	1508
0Safe_safe_DTKP_205391.5342	1394
0Safe_safe_DTKP_205392.5343	1982
0Safe_safe_DTKP_205393.5344	491
0Safe_safe_DTKP_205411.5362	1332
0Safe_safe_DTKP_205422.5373	1836
0Safe_safe_DTKP_205423.5374	1557
0Safe_safe_DTKP_205424.5375	2531
0Safe_safe_DTKP_205448.5399	2022
0Safe_safe_DTKP_205449.5400	2334
0Safe_safe_DTKP_205477.5428	1803
0Safe_safe_DTKP_205480.5431	1836
0Safe_safe_DTKP_205483.5434	849
0Safe_safe_DTKP_205488.5439	3003
0Safe_safe_DTKP_205490.5441	2927
0Safe_safe_DTKP_205492.5443	1347
0Safe_safe_DTKP_205504.5455	1226
0Safe_safe_DTKP_205505.5456	1432
0Safe_safe_DTKP_205509.5460	1759
0Safe_safe_DTKP_205511.5462	1661
0Safe_safe_DTKP_205513.5464	1750
0Safe_safe_DTKP_205521.5472	1331
0Safe_safe_DTKP_205529.5480	2336
0Safe_safe_DTKP_205533.5484	1863
0Safe_safe_DTKP_205538.5489	1417
0Safe_safe_DTKP_205539.5490	906
0Safe_safe_DTKP_205542.5493	2594
0Safe_safe_DTKP_205543.5494	2630
0Safe_safe_DTKP_205554.5505	2675
0Safe_safe_DTKP_205556.5507	2069
0Safe_safe_DTKP_205558.5509	2100
0Safe_safe_DTKP_205562.5513	3762
0Safe_safe_DTKP_205563.5514	1506
0Safe_safe_DTKP_205569.5520	658
0Safe_safe_DTKP_205574.5525	556
0Safe_safe_DTKP_205581.5532	1003
0Safe_safe_DTKP_205584.5535	2206
0Safe_safe_DTKP_205585.5536	2357
0Safe_safe_DTKP_205591.5542	1409
0Safe_safe_DTKP_205599.5550	2003
0Safe_safe_DTKP_205613.5564	987
0Safe_safe_DTKP_205620.5571	2985
0Safe_safe_DTKP_205640.5591	1096
0Safe_safe_DTKP_205681.5632	1645
0Safe_safe_DTKP_205686.5637	2323
0Safe_safe_DTKP_205711.5662	2185
0Safe_safe_DTKP_205718.5669	3092
0Safe_safe_DTKP_205723.5674	1141
0Safe_safe_DTKP_205727.5678	1606
0Safe_safe_DTKP_205733.5684	1025
0Safe_safe_DTKP_205749.5700	1950
0Safe_safe_DTKP_205753.5704	2257
0Safe_safe_DTKP_205761.5712	1065
0Safe_safe_DTKP_205768.5719	2967
0Safe_safe_DTKP_205774.5725	2146
0Safe_safe_DTKP_205778.5729	1407
0Safe_safe_DTKP_205789.5740	2178
0Safe_safe_DTKP_205790.5741	923
0Safe_safe_DTKP_205794.5745	3136
0Safe_safe_DTKP_205803.5754	1454
0Safe_safe_DTKP_205818.5769	1974
0Safe_safe_DTKP_205820.5771	2195
0Safe_safe_DTKP_205822.5773	631
0Safe_safe_DTKP_205839.5790	2510
0Safe_safe_DTKP_205872.5823	1809
0Safe_safe_DTKP_205877.5828	1639
0Safe_safe_DTKP_205884.5835	2459
0Safe_safe_DTKP_205900.5851	1320
0Safe_safe_DTKP_205926.5877	1534
0Safe_safe_DTKP_205940.5891	1437
0Safe_safe_DTKP_205944.5895	1255
0Safe_safe_DTKP_205950.5901	3531
0Safe_safe_DTKP_205963.5914	2723
0Safe_safe_DTKP_205983.5934	2116
0Safe_safe_DTKP_205986.5937	2530
0Safe_safe_DTKP_205988.5939	2392
0Safe_safe_DTKP_205992.5943	967
0Safe_safe_DTKP_205998.5949	1214
0Safe_safe_DTKP_206016.5967	2027
0Safe_safe_DTKP_206017.5968	1506
0Safe_safe_DTKP_206021.5972	1727
0Safe_safe_DTKP_206023.5974	1980
0Safe_safe_DTKP_206030.5981	1665
0Safe_safe_DTKP_206036.5987	1369
0Safe_safe_DTKP_206045.5996	2028
0Safe_safe_DTKP_206046.5997	2906
0Safe_safe_GEEX_206053.1504	1421
0Safe_safe_GEEX_206056.1507	2804
0Safe_safe_GEEX_206061.1512	1861
0Safe_safe_GEEX_206067.1518	2484
0Safe_safe_GEEX_206081.1532	2382
0Safe_safe_GEEX_206095.1546	1519
0Safe_safe_GEEX_206113.1564	946
0Safe_safe_GEEX_206119.1570	1804
0Safe_safe_GEEX_206123.1574	1406
0Safe_safe_GEEX_206125.1576	1321
0Safe_safe_GEEX_206126.1577	2523
0Safe_safe_GEEX_206141.1592	3140
0Safe_safe_GEEX_206146.1597	2408
0Safe_safe_GEEX_206147.1598	1752
0Safe_safe_GEEX_206148.1599	1808
0Safe_safe_GEEX_206149.1600	1346
0Safe_safe_GEEX_206154.1605	1906
0Safe_safe_GEEX_206155.1606	453
0Safe_safe_GEEX_206156.1607	2355
0Safe_safe_GEEX_206164.1615	2864
0Safe_safe_GEEX_206167.1618	2426
0Safe_safe_GEEX_206170.1621	2058
0Safe_safe_GEEX_206192.1643	2001
0Safe_safe_GEEX_206199.1650	1727
0Safe_safe_GEEX_206206.1657	1137
0Safe_safe_GEEX_206210.1661	1729
0Safe_safe_GEEX_206217.1668	3072
0Safe_safe_GEEX_206232.1683	1725
0Safe_safe_GEEX_206235.1686	2551
0Safe_safe_GEEX_206236.1687	1486
0Safe_safe_GEEX_206238.1689	2283
0Safe_safe_GEEX_206242.1693	723
0Safe_safe_GEEX_206243.1694	1613
0Safe_safe_GEEX_206251.1702	1662
0Safe_safe_GEEX_206253.1704	2369
0Safe_safe_GEEX_206254.1705	1623
0Safe_safe_GEEX_206258.1709	1303
0Safe_safe_GEEX_206259.1710	1239
0Safe_safe_GEEX_206268.1719	3133
0Safe_safe_GEEX_206273.1724	1989
0Safe_safe_GEEX_206276.1727	1270
0Safe_safe_GEEX_206290.1741	1281
0Safe_safe_GEEX_206293.1744	2386
0Safe_safe_GEEX_206294.1745	1559
0Safe_safe_GEEX_206301.1752	1434
0Safe_safe_GEEX_206305.1756	2361
0Safe_safe_GEEX_206311.1762	994
0Safe_safe_GEEX_206321.1772	1379
0Safe_safe_GEEX_206325.1776	2199
0Safe_safe_GEEX_206329.1780	1856
0Safe_safe_GEEX_206335.1786	1177
0Safe_safe_GEEX_206336.1787	2751
0Safe_safe_GEEX_206338.1789	1192
0Safe_safe_GEEX_206346.1797	1076
0Safe_safe_GEEX_206352.1803	2708
0Safe_safe_GEEX_206359.1810	1235
0Safe_safe_GEEX_206374.1825	1100
0Safe_safe_GEEX_206375.1826	2705
0Safe_safe_GEEX_206383.1834	2059
0Safe_safe_GEEX_206391.1842	1377
0Safe_safe_GEEX_206394.1845	2503
0Safe_safe_GEEX_206399.1850	2348
0Safe_safe_GEEX_206400.1851	1059
0Safe_safe_GEEX_206405.1856	3186
0Safe_safe_GEEX_206411.1862	1801
0Safe_safe_GEEX_206415.1866	1429
0Safe_safe_GEEX_206417.1868	1632
0Safe_safe_GEEX_206421.1872	2152
0Safe_safe_GEEX_206440.1891	2769
0Safe_safe_GEEX_206443.1894	3746
0Safe_safe_GEEX_206445.1896	2814
0Safe_safe_GEEX_206451.1902	2142
0Safe_safe_GEEX_206463.1914	1674
0Safe_safe_GEEX_206501.1952	2144
0Safe_safe_GEEX_206502.1953	1968
0Safe_safe_GEEX_206507.1958	2052
0Safe_safe_GEEX_206510.1961	527
0Safe_safe_GEEX_206522.1973	1334
0Safe_safe_GEEX_206526.1977	1968
0Safe_safe_GEEX_206530.1981	1716
0Safe_safe_GEEX_206541.1992	1751
0Safe_safe_GEEX_206547.1998	1169
0Safe_safe_GEEX_206551.2002	3276
0Safe_safe_GEEX_206552.2003	1744
0Safe_safe_GEEX_206553.2004	2184
0Safe_safe_GEEX_206557.2008	1715
0Safe_safe_GEEX_206565.2016	1047
0Safe_safe_GEEX_206580.2031	2656
0Safe_safe_GEEX_206583.2034	2401
0Safe_safe_GEEX_206585.2036	1882
0Safe_safe_GEEX_206587.2038	2441
0Safe_safe_GEEX_206588.2039	1944
0Safe_safe_GEEX_206597.2048	2199
0Safe_safe_GEEX_206613.2064	968
0Safe_safe_GEEX_206626.2077	2760
0Safe_safe_GEEX_206642.2093	1228
0Safe_safe_GEEX_206648.2099	1623
0Safe_safe_GEEX_206649.2100	1565
0Safe_safe_GEEX_206676.2127	2199
0Safe_safe_GEEX_206685.2136	2192
0Safe_safe_GEEX_206705.2156	2587
0Safe_safe_GEEX_206720.2171	1381
0Safe_safe_GEEX_206730.2181	1177
0Safe_safe_GEEX_206731.2182	1691
0Safe_safe_GEEX_206743.2194	1032
0Safe_safe_GEEX_206747.2198	1273
0Safe_safe_GEEX_206753.2204	1326
0Safe_safe_GEEX_206760.2211	2471
0Safe_safe_GEEX_206774.2225	1714
0Safe_safe_GEEX_206778.2229	750
0Safe_safe_GEEX_206781.2232	2578
0Safe_safe_GEEX_206784.2235	1876
0Safe_safe_GEEX_206792.2243	2005
0Safe_safe_GEEX_206793.2244	1516
0Safe_safe_MEPR_206803.1003	1957
0Safe_safe_MEPR_206804.1004	1314
0Safe_safe_MEPR_206807.1007	1342
0Safe_safe_MEPR_206810.1010	1586
0Safe_safe_MEPR_206814.1014	2804
0Safe_safe_MEPR_206826.1026	2793
0Safe_safe_MEPR_206827.1027	2852
0Safe_safe_MEPR_206843.1043	1994
0Safe_safe_MEPR_206857.1057	2618
0Safe_safe_MEPR_206859.1059	2895
0Safe_safe_MEPR_206869.1069	1921
0Safe_safe_MEPR_206870.1070	1931
0Safe_safe_MEPR_206876.1076	1893
0Safe_safe_MEPR_206891.1091	1682
0Safe_safe_MEPR_206892.1092	2175
0Safe_safe_MEPR_206896.1096	871
0Safe_safe_MEPR_206901.1101	2416
0Safe_safe_MEPR_206914.1114	1359
0Safe_safe_MEPR_206916.1116	1710
0Safe_safe_MEPR_206918.1118	1671
0Safe_safe_MEPR_206921.1121	2079
0Safe_safe_MEPR_206930.1130	1164
0Safe_safe_MEPR_206935.1135	2171
0Safe_safe_MEPR_206938.1138	1779
0Safe_safe_MEPR_206951.1151	2655
0Safe_safe_MEPR_206960.1160	2182
0Safe_safe_MEPR_206961.1161	956
0Safe_safe_MEPR_206965.1165	1971
0Safe_safe_MEPR_206968.1168	605
0Safe_safe_MEPR_206970.1170	3125
0Safe_safe_MEPR_206976.1176	1943
0Safe_safe_MEPR_206979.1179	2175
0Safe_safe_MEPR_206983.1183	1845
0Safe_safe_MEPR_206989.1189	1129
0Safe_safe_MEPR_207012.1212	1893
0Safe_safe_MEPR_207015.1215	1986
0Safe_safe_MEPR_207019.1219	2086
0Safe_safe_MEPR_207025.1225	971
0Safe_safe_MEPR_207028.1228	2012
0Safe_safe_MEPR_207030.1230	381
0Safe_safe_MEPR_207031.1231	490
0Safe_safe_MEPR_207036.1236	2017
0Safe_safe_MEPR_207037.1237	1863
0Safe_safe_MEPR_207042.1242	1197
0Safe_safe_MEPR_207045.1245	2269
0Safe_safe_MEPR_207057.1257	2385
0Safe_safe_MEPR_207060.1260	2305
0Safe_safe_MEPR_207070.1270	1401
0Safe_safe_MEPR_207071.1271	1912
0Safe_safe_MEPR_207073.1273	1592
0Safe_safe_MEPR_207101.1301	769
0Safe_safe_MEPR_207106.1306	557
0Safe_safe_MEPR_207108.1308	1264
0Safe_safe_MEPR_207112.1312	997
0Safe_safe_MEPR_207133.1333	1758
0Safe_safe_MEPR_207148.1348	3012
0Safe_safe_MEPR_207151.1351	1744
0Safe_safe_MEPR_207158.1358	1175
0Safe_safe_MEPR_207162.1362	1136
0Safe_safe_MEPR_207168.1368	2430
0Safe_safe_MEPR_207169.1369	1486
0Safe_safe_MEPR_207173.1373	910
0Safe_safe_MEPR_207175.1375	770
0Safe_safe_MEPR_207181.1381	2903
0Safe_safe_MEPR_207196.1396	3957
0Safe_safe_MEPR_207198.1398	2379
0Safe_safe_MEPR_207203.1403	1890
0Safe_safe_MEPR_207215.1415	1863
0Safe_safe_MEPR_207254.1454	1644
0Safe_safe_MEPR_207260.1460	1942
0Safe_safe_MEPR_207271.1471	2346
0Safe_safe_MEPR_207273.1473	1793
0Safe_safe_MEPR_207276.1476	2846
0Safe_safe_MEPR_207297.1497	974
0Safe_safe_MEPR_207300.1500	2952
0Safe_safe_MEPR_207304.754	2045
0Safe_safe_MEPR_207323.773	2041
0Safe_safe_MEPR_207325.775	3759
0Safe_safe_MEPR_207329.779	2442
0Safe_safe_MEPR_207331.781	1721
0Safe_safe_MEPR_207334.784	1402
0Safe_safe_MEPR_207339.789	413
0Safe_safe_MEPR_207347.797	1999
0Safe_safe_MEPR_207348.798	1857
0Safe_safe_MEPR_207351.801	542
0Safe_safe_MEPR_207381.831	1103
0Safe_safe_MEPR_207386.836	1132
0Safe_safe_MEPR_207387.837	2815
0Safe_safe_MEPR_207389.839	3116
0Safe_safe_MEPR_207392.842	1698
0Safe_safe_MEPR_207397.847	1939
0Safe_safe_MEPR_207402.852	2693
0Safe_safe_MEPR_207413.863	1736
0Safe_safe_MEPR_207414.864	1816
0Safe_safe_MEPR_207429.879	2971
0Safe_safe_MEPR_207454.904	2600
0Safe_safe_MEPR_207455.905	1500
0Safe_safe_MEPR_207456.906	1470
0Safe_safe_MEPR_207462.912	2877
0Safe_safe_MEPR_207467.917	1793
0Safe_safe_MEPR_207471.921	1833
0Safe_safe_MEPR_207478.928	2324
0Safe_safe_MEPR_207481.931	728
0Safe_safe_MEPR_207484.934	1027
0Safe_safe_MEPR_207486.936	874
0Safe_safe_MEPR_207487.937	1620
0Safe_safe_MEPR_207488.938	1725
0Safe_safe_MEPR_207490.940	641
0Safe_safe_MEPR_207491.941	1358
0Safe_safe_MEPR_207494.944	1637
0Safe_safe_MEPR_207495.945	1119
0Safe_safe_MEPR_207497.947	1556
0Safe_safe_MEPR_207500.950	2164
0Safe_safe_MEPR_207502.952	2228
0Safe_safe_MEPR_207518.968	1543
0Safe_safe_MEPR_207534.984	2494
0Safe_safe_MEPR_207542.992	1637
0Safe_safe_MEPR_207544.994	2028
0Safe_safe_PROT_207550.2251	2495
0Safe_safe_PROT_207553.2254	1968
0Safe_safe_PROT_207554.2255	1282
0Safe_safe_PROT_207559.2260	1078
0Safe_safe_PROT_207566.2267	1612
0Safe_safe_PROT_207578.2279	1523
0Safe_safe_PROT_207581.2282	1568
0Safe_safe_PROT_207597.2298	955
0Safe_safe_PROT_207600.2301	1353
0Safe_safe_PROT_207604.2305	2196
0Safe_safe_PROT_207605.2306	2579
0Safe_safe_PROT_207610.2311	1019
0Safe_safe_PROT_207611.2312	2001
0Safe_safe_PROT_207617.2318	925
0Safe_safe_PROT_207628.2329	1258
0Safe_safe_PROT_207631.2332	2145
0Safe_safe_PROT_207634.2335	1508
0Safe_safe_PROT_207643.2344	2562
0Safe_safe_PROT_207645.2346	2603
0Safe_safe_PROT_207653.2354	2658
0Safe_safe_PROT_207662.2363	2754
0Safe_safe_PROT_207675.2376	1744
0Safe_safe_PROT_207698.2399	2327
0Safe_safe_PROT_207700.2401	3032
0Safe_safe_PROT_207702.2403	939
0Safe_safe_PROT_207703.2404	2240
0Safe_safe_PROT_207730.2431	1899
0Safe_safe_PROT_207734.2435	1374
0Safe_safe_PROT_207736.2437	2008
0Safe_safe_PROT_207737.2438	3311
0Safe_safe_PROT_207739.2440	1320
0Safe_safe_PROT_207741.2442	846
0Safe_safe_PROT_207786.2487	1636
0Safe_safe_PROT_207794.2495	399
0Safe_safe_PROT_207801.2502	890
0Safe_safe_PROT_207802.2503	2783
0Safe_safe_PROT_207827.2528	1784
0Safe_safe_PROT_207833.2534	1252
0Safe_safe_PROT_207836.2537	1335
0Safe_safe_PROT_207841.2542	1028
0Safe_safe_PROT_207844.2545	2739
0Safe_safe_PROT_207847.2548	1719
0Safe_safe_PROT_207854.2555	1318
0Safe_safe_PROT_207862.2563	1798
0Safe_safe_PROT_207863.2564	1537
0Safe_safe_PROT_207876.2577	1363
0Safe_safe_PROT_207878.2579	2170
0Safe_safe_PROT_207887.2588	757
0Safe_safe_PROT_207896.2597	1466
0Safe_safe_PROT_207901.2602	983
0Safe_safe_PROT_207908.2609	1154
0Safe_safe_PROT_207912.2613	2451
0Safe_safe_PROT_207914.2615	2144
0Safe_safe_PROT_207916.2617	1630
0Safe_safe_PROT_207926.2627	1737
0Safe_safe_PROT_207928.2629	1321
0Safe_safe_PROT_207931.2632	1663
0Safe_safe_PROT_207932.2633	1676
0Safe_safe_PROT_207933.2634	3404
0Safe_safe_PROT_207936.2637	1471
0Safe_safe_PROT_207937.2638	1131
0Safe_safe_PROT_207949.2650	1443
0Safe_safe_PROT_207952.2653	1296
0Safe_safe_PROT_207960.2661	2078
0Safe_safe_PROT_207962.2663	1550
0Safe_safe_PROT_207973.2674	2104
0Safe_safe_PROT_207980.2681	4164
0Safe_safe_PROT_207983.2684	1466
0Safe_safe_PROT_207986.2687	2360
0Safe_safe_PROT_207990.2691	2236
0Safe_safe_PROT_207992.2693	2180
0Safe_safe_PROT_208008.2709	1491
0Safe_safe_PROT_208009.2710	1497
0Safe_safe_PROT_208013.2714	2533
0Safe_safe_PROT_208021.2722	1521
0Safe_safe_PROT_208030.2731	1280
0Safe_safe_PROT_208031.2732	1818
0Safe_safe_PROT_208032.2733	1609
0Safe_safe_PROT_208035.2736	2592
0Safe_safe_PROT_208041.2742	1499
0Safe_safe_PROT_208044.2745	1756
0Safe_safe_PROT_208046.2747	3301
0Safe_safe_PROT_208050.2751	1593
0Safe_safe_PROT_208051.2752	1840
0Safe_safe_PROT_208054.2755	2029
0Safe_safe_PROT_208062.2763	2307
0Safe_safe_PROT_208082.2783	1273
0Safe_safe_PROT_208086.2787	2486
0Safe_safe_PROT_208087.2788	3193
0Safe_safe_PROT_208095.2796	2512
0Safe_safe_PROT_208096.2797	1126
0Safe_safe_PROT_208101.2802	2720
0Safe_safe_PROT_208106.2807	1763
0Safe_safe_PROT_208111.2812	1642
0Safe_safe_PROT_208127.2828	3825
0Safe_safe_PROT_208148.2849	1745
0Safe_safe_PROT_208165.2866	2479
0Safe_safe_PROT_208166.2867	1910
0Safe_safe_PROT_208174.2875	1481
0Safe_safe_PROT_208177.2878	2721
0Safe_safe_PROT_208180.2881	2509
0Safe_safe_PROT_208181.2882	2205
0Safe_safe_PROT_208190.2891	1343
0Safe_safe_PROT_208213.2914	1963
0Safe_safe_PROT_208219.2920	2222
0Safe_safe_PROT_208220.2921	1224
0Safe_safe_PROT_208222.2923	2935
0Safe_safe_PROT_208232.2933	1615
0Safe_safe_PROT_208233.2934	3363
0Safe_safe_PROT_208235.2936	1515
0Safe_safe_PROT_208237.2938	3999
0Safe_safe_PROT_208247.2948	2878
0Safe_safe_PROT_208248.2949	1590
0Safe_safe_PROT_208262.2963	1703
0Safe_safe_PROT_208263.2964	2728
0Safe_safe_PROT_208267.2968	1810
0Safe_safe_PROT_208268.2969	1590
0Safe_safe_PROT_208269.2970	1897
0Safe_safe_PROT_208276.2977	1737
0Safe_safe_PROT_208288.2989	2375
0Safe_safe_PROT_208299.3000	2534
0Safe_safe_TMMO_208300.1	1466
0Safe_safe_TMMO_208309.107	2451
0Safe_safe_TMMO_208317.114	3816
0Safe_safe_TMMO_208324.120	2248
0Safe_safe_TMMO_208335.130	1765
0Safe_safe_TMMO_208340.135	2039
0Safe_safe_TMMO_208349.143	1618
0Safe_safe_TMMO_208368.160	3059
0Safe_safe_TMMO_208381.172	1184
0Safe_safe_TMMO_208382.173	2096
0Safe_safe_TMMO_208393.183	1567
0Safe_safe_TMMO_208399.189	2426
0Safe_safe_TMMO_208401.190	1618
0Safe_safe_TMMO_208403.192	1728
0Safe_safe_TMMO_208410.199	1258
0Safe_safe_TMMO_208416.203	1486
0Safe_safe_TMMO_208429.215	1026
0Safe_safe_TMMO_208438.223	1947
0Safe_safe_TMMO_208439.224	3243
0Safe_safe_TMMO_208451.235	2255
0Safe_safe_TMMO_208454.238	1363
0Safe_safe_TMMO_208475.257	2142
0Safe_safe_TMMO_208485.266	1040
0Safe_safe_TMMO_208492.272	2519
0Safe_safe_TMMO_208506.285	2315
0Safe_safe_TMMO_208531.307	1609
0Safe_safe_TMMO_208535.310	1597
0Safe_safe_TMMO_208541.316	1534
0Safe_safe_TMMO_208549.323	2676
0Safe_safe_TMMO_208574.346	1774
0Safe_safe_TMMO_208576.348	3213
0Safe_safe_TMMO_208577.349	1873
0Safe_safe_TMMO_208582.353	2276
0Safe_safe_TMMO_208583.354	2276
0Safe_safe_TMMO_208590.360	1790
0Safe_safe_TMMO_208611.38	1287
0Safe_safe_TMMO_208614.382	1130
0Safe_safe_TMMO_208616.384	1779
0Safe_safe_TMMO_208618.386	1329
0Safe_safe_TMMO_208628.395	2843
0Safe_safe_TMMO_208630.397	586
0Safe_safe_TMMO_208631.398	3305
0Safe_safe_TMMO_208634.40	833
0Safe_safe_TMMO_208649.413	1340
0Safe_safe_TMMO_208654.418	1818
0Safe_safe_TMMO_208657.420	1569
0Safe_safe_TMMO_208677.439	1626
0Safe_safe_TMMO_208691.451	1213
0Safe_safe_TMMO_208697.457	2328
0Safe_safe_TMMO_208704.463	2223
0Safe_safe_TMMO_208707.466	195
0Safe_safe_TMMO_208710.469	1763
0Safe_safe_TMMO_208724.481	1851
0Safe_safe_TMMO_208726.483	2081
0Safe_safe_TMMO_208727.484	1606
0Safe_safe_TMMO_208730.487	1693
0Safe_safe_TMMO_208735.491	1895
0Safe_safe_TMMO_208737.493	2498
0Safe_safe_TMMO_208739.495	969
0Safe_safe_TMMO_208756.51	2029
0Safe_safe_TMMO_208773.525	2518
0Safe_safe_TMMO_208778.53	2230
0Safe_safe_TMMO_208786.537	1700
0Safe_safe_TMMO_208793.543	1899
0Safe_safe_TMMO_208794.544	1316
0Safe_safe_TMMO_208799.549	2134
0Safe_safe_TMMO_208802.551	1443
0Safe_safe_TMMO_208805.554	2324
0Safe_safe_TMMO_208812.560	2571
0Safe_safe_TMMO_208831.578	1726
0Safe_safe_TMMO_208832.579	1950
0Safe_safe_TMMO_208854.599	1842
0Safe_safe_TMMO_208867.61	2686
0Safe_safe_TMMO_208868.610	1782
0Safe_safe_TMMO_208882.623	1648
0Safe_safe_TMMO_208886.627	2071
0Safe_safe_TMMO_208911.65	2059
0Safe_safe_TMMO_208913.651	2160
0Safe_safe_TMMO_208917.655	2644
0Safe_safe_TMMO_208918.656	2258
0Safe_safe_TMMO_208919.657	936
0Safe_safe_TMMO_208926.663	3471
0Safe_safe_TMMO_208939.675	3017
0Safe_safe_TMMO_208947.682	1774
0Safe_safe_TMMO_208958.692	2103
0Safe_safe_TMMO_208962.696	1663
0Safe_safe_TMMO_208963.697	891
0Safe_safe_TMMO_208980.711	2305
0Safe_safe_TMMO_208983.714	1325
0Safe_safe_TMMO_208990.720	1990
0Safe_safe_TMMO_208993.723	1813
0Safe_safe_TMMO_208997.727	1509
0Safe_safe_TMMO_209005.734	1205
0Safe_safe_TMMO_209012.740	1271
0Safe_safe_TMMO_209013.741	2010
0Safe_safe_TMMO_209016.744	1592
0Safe_safe_TMMO_209019.747	1923
0Safe_safe_TMMO_209022.75	1629
0Safe_safe_TMMO_209024.76	2446
0Safe_safe_TMMO_209025.77	2667
0Safe_safe_TMMO_209031.82	2465
0Safe_safe_TMMO_209036.87	735
0Safe_safe_TMMO_209039.9	813
0Safe_safe_TMMO_209043.93	1418
0Safe_safe_UNA1_209066.3767	1845
0Safe_safe_UNA1_209072.3773	2090
0Safe_safe_UNA1_209089.3790	3120
0Safe_safe_UNA1_209095.3796	2380
0Safe_safe_UNA1_209107.3808	2354
0Safe_safe_UNA1_209114.3815	1972
0Safe_safe_UNA1_209119.3820	1383
0Safe_safe_UNA1_209126.3827	1412
0Safe_safe_UNA1_209127.3828	1575
0Safe_safe_UNA1_209137.3838	1581
0Safe_safe_UNA1_209150.3851	2457
0Safe_safe_UNA1_209153.3854	3111
0Safe_safe_UNA1_209162.3863	2025
0Safe_safe_UNA1_209166.3867	2603
0Safe_safe_UNA1_209181.3882	1733
0Safe_safe_UNA1_209182.3883	1131
0Safe_safe_UNA1_209187.3888	1500
0Safe_safe_UNA1_209191.3892	1821
0Safe_safe_UNA1_209192.3893	1481
0Safe_safe_UNA1_209194.3895	1902
0Safe_safe_UNA1_209198.3899	1368
0Safe_safe_UNA1_209205.3906	3753
0Safe_safe_UNA1_209206.3907	1364
0Safe_safe_UNA1_209208.3909	2950
0Safe_safe_UNA1_209212.3913	1986
0Safe_safe_UNA1_209217.3918	103
0Safe_safe_UNA1_209218.3919	1054
0Safe_safe_UNA1_209236.3937	3675
0Safe_safe_UNA1_209245.3946	1679
0Safe_safe_UNA1_209266.3967	2752
0Safe_safe_UNA1_209280.3981	1056
0Safe_safe_UNA1_209283.3984	1429
0Safe_safe_UNA1_209289.3990	1641
0Safe_safe_UNA1_209292.3993	1342
0Safe_safe_UNA1_209294.3995	2230
0Safe_safe_UNA1_209313.4014	1603
0Safe_safe_UNA1_209320.4021	2719
0Safe_safe_UNA1_209331.4032	2278
0Safe_safe_UNA1_209340.4041	1460
0Safe_safe_UNA1_209344.4045	2708
0Safe_safe_UNA1_209349.4050	1904
0Safe_safe_UNA1_209352.4053	2115
0Safe_safe_UNA1_209353.4054	2112
0Safe_safe_UNA1_209355.4056	381
0Safe_safe_UNA1_209358.4059	1222
0Safe_safe_UNA1_209365.4066	1447
0Safe_safe_UNA1_209366.4067	1372
0Safe_safe_UNA1_209372.4073	989
0Safe_safe_UNA1_209373.4074	2316
0Safe_safe_UNA1_209380.4081	2915
0Safe_safe_UNA1_209387.4088	1555
0Safe_safe_UNA1_209411.4112	2078
0Safe_safe_UNA1_209413.4114	2533
0Safe_safe_UNA1_209424.4125	2250
0Safe_safe_UNA1_209433.4134	1283
0Safe_safe_UNA1_209436.4137	1278
0Safe_safe_UNA1_209441.4142	2315
0Safe_safe_UNA1_209445.4146	1711
0Safe_safe_UNA1_209446.4147	2211
0Safe_safe_UNA1_209464.4165	587
0Safe_safe_UNA1_209467.4168	2220
0Safe_safe_UNA1_209471.4172	655
0Safe_safe_UNA1_209473.4174	1278
0Safe_safe_UNA1_209474.4175	1700
0Safe_safe_UNA1_209477.4178	2125
0Safe_safe_UNA1_209479.4180	1107
0Safe_safe_UNA1_209485.4186	2111
0Safe_safe_UNA1_209487.4188	1607
0Safe_safe_UNA1_209508.4209	1962
0Safe_safe_UNA1_209510.4211	1431
0Safe_safe_UNA1_209513.4214	1502
0Safe_safe_UNA1_209517.4218	2858
0Safe_safe_UNA1_209523.4224	1267
0Safe_safe_UNA1_209524.4225	2036
0Safe_safe_UNA1_209525.4226	1911
0Safe_safe_UNA1_209533.4234	2113
0Safe_safe_UNA1_209546.4247	2670
0Safe_safe_UNA1_209548.4249	1639
0Safe_safe_UNA1_209564.4265	2406
0Safe_safe_UNA1_209580.4281	2853
0Safe_safe_UNA1_209583.4284	2296
0Safe_safe_UNA1_209591.4292	860
0Safe_safe_UNA1_209595.4296	1187
0Safe_safe_UNA1_209603.4304	1259
0Safe_safe_UNA1_209608.4309	2483
0Safe_safe_UNA1_209612.4313	2340
0Safe_safe_UNA1_209627.4328	2250
0Safe_safe_UNA1_209631.4332	1624
0Safe_safe_UNA1_209633.4334	1469
0Safe_safe_UNA1_209639.4340	2879
0Safe_safe_UNA1_209642.4343	2000
0Safe_safe_UNA1_209645.4346	1907
0Safe_safe_UNA1_209646.4347	1474
0Safe_safe_UNA1_209661.4362	927
0Safe_safe_UNA1_209678.4379	2106
0Safe_safe_UNA1_209684.4385	1533
0Safe_safe_UNA1_209685.4386	2063
0Safe_safe_UNA1_209692.4393	1724
0Safe_safe_UNA1_209693.4394	2686
0Safe_safe_UNA1_209702.4403	1766
0Safe_safe_UNA1_209707.4408	2270
0Safe_safe_UNA1_209708.4409	2101
0Safe_safe_UNA1_209714.4415	1439
0Safe_safe_UNA1_209718.4419	1683
0Safe_safe_UNA1_209726.4427	905
0Safe_safe_UNA1_209732.4433	1158
0Safe_safe_UNA1_209735.4436	2657
0Safe_safe_UNA1_209738.4439	1290
0Safe_safe_UNA1_209753.4454	2021
0Safe_safe_UNA1_209776.4477	1335
0Safe_safe_UNA1_209779.4480	2065
0Safe_safe_UNA1_209781.4482	1433
0Safe_safe_UNA2_209806.3007	2584
0Safe_safe_UNA2_209807.3008	1511
0Safe_safe_UNA2_209811.3012	83
0Safe_safe_UNA2_209817.3018	1873
0Safe_safe_UNA2_209819.3020	2363
0Safe_safe_UNA2_209840.3041	2625
0Safe_safe_UNA2_209851.3052	1127
0Safe_safe_UNA2_209866.3067	1389
0Safe_safe_UNA2_209870.3071	1390
0Safe_safe_UNA2_209872.3073	2386
0Safe_safe_UNA2_209888.3089	1706
0Safe_safe_UNA2_209890.3091	478
0Safe_safe_UNA2_209891.3092	1816
0Safe_safe_UNA2_209896.3097	2038
0Safe_safe_UNA2_209912.3113	2207
0Safe_safe_UNA2_209918.3119	1294
0Safe_safe_UNA2_209924.3125	2856
0Safe_safe_UNA2_209925.3126	1982
0Safe_safe_UNA2_209936.3137	2278
0Safe_safe_UNA2_209941.3142	2296
0Safe_safe_UNA2_209947.3148	2244
0Safe_safe_UNA2_209950.3151	1426
0Safe_safe_UNA2_209958.3159	1844
0Safe_safe_UNA2_209977.3178	2643
0Safe_safe_UNA2_209981.3182	2496
0Safe_safe_UNA2_210003.3204	2790
0Safe_safe_UNA2_210034.3235	1443
0Safe_safe_UNA2_210050.3251	1144
0Safe_safe_UNA2_210057.3258	1646
0Safe_safe_UNA2_210059.3260	1400
0Safe_safe_UNA2_210077.3278	806
0Safe_safe_UNA2_210081.3282	1812
0Safe_safe_UNA2_210083.3284	2278
0Safe_safe_UNA2_210085.3286	2760
0Safe_safe_UNA2_210091.3292	1922
0Safe_safe_UNA2_210094.3295	1945
0Safe_safe_UNA2_210096.3297	652
0Safe_safe_UNA2_210101.3302	1252
0Safe_safe_UNA2_210120.3321	814
0Safe_safe_UNA2_210135.3336	1640
0Safe_safe_UNA2_210139.3340	1549
0Safe_safe_UNA2_210153.3354	2140
0Safe_safe_UNA2_210155.3356	2747
0Safe_safe_UNA2_210156.3357	1818
0Safe_safe_UNA2_210166.3367	1184
0Safe_safe_UNA2_210168.3369	1673
0Safe_safe_UNA2_210183.3384	1024
0Safe_safe_UNA2_210185.3386	2310
0Safe_safe_UNA2_210192.3393	1486
0Safe_safe_UNA2_210193.3394	984
0Safe_safe_UNA2_210200.3401	1231
0Safe_safe_UNA2_210202.3403	1907
0Safe_safe_UNA2_210204.3405	1891
0Safe_safe_UNA2_210206.3407	1945
0Safe_safe_UNA2_210221.3422	1340
0Safe_safe_UNA2_210223.3424	1810
0Safe_safe_UNA2_210226.3427	908
0Safe_safe_UNA2_210227.3428	2879
0Safe_safe_UNA2_210236.3437	1532
0Safe_safe_UNA2_210241.3442	1310
0Safe_safe_UNA2_210247.3448	1944
0Safe_safe_UNA2_210258.3459	1825
0Safe_safe_UNA2_210265.3466	1520
0Safe_safe_UNA2_210283.3484	1327
0Safe_safe_UNA2_210288.3489	2317
0Safe_safe_UNA2_210292.3493	2565
0Safe_safe_UNA2_210294.3495	1202
0Safe_safe_UNA2_210298.3499	1030
0Safe_safe_UNA2_210299.3500	2014
0Safe_safe_UNA2_210312.3513	569
0Safe_safe_UNA2_210313.3514	1996
0Safe_safe_UNA2_210321.3522	1929
0Safe_safe_UNA2_210327.3528	1549
0Safe_safe_UNA2_210337.3538	1948
0Safe_safe_UNA2_210341.3542	1070
0Safe_safe_UNA2_210351.3552	2618
0Safe_safe_UNA2_210357.3558	1753
0Safe_safe_UNA2_210358.3559	2243
0Safe_safe_UNA2_210363.3564	1630
0Safe_safe_UNA2_210373.3574	2333
0Safe_safe_UNA2_210378.3579	1615
0Safe_safe_UNA2_210388.3589	1053
0Safe_safe_UNA2_210402.3603	2364
0Safe_safe_UNA2_210419.3620	1926
0Safe_safe_UNA2_210420.3621	1641
0Safe_safe_UNA2_210434.3635	1335
0Safe_safe_UNA2_210459.3660	1270
0Safe_safe_UNA2_210478.3679	1986
0Safe_safe_UNA2_210480.3681	526
0Safe_safe_UNA2_210483.3684	2966
0Safe_safe_UNA2_210487.3688	1816
0Safe_safe_UNA2_210489.3690	2051
0Safe_safe_UNA2_210490.3691	2025
0Safe_safe_UNA2_210500.3701	2353
0Safe_safe_UNA2_210512.3713	2300
0Safe_safe_UNA2_210521.3722	1975
0Safe_safe_UNA2_210527.3728	1665
0Safe_safe_UNA2_210538.3739	2293
0Safe_safe_UNA2_210547.3748	1151
0Safe_safe_UNA3_210560.6011	1054
0Safe_safe_UNA3_210582.6033	2107
0Safe_safe_UNA3_210586.6037	1282
0Safe_safe_UNA3_210593.6044	1481
0Safe_safe_UNA3_210599.6050	2177
0Safe_safe_UNA3_210601.6052	1344
0Safe_safe_UNA3_210606.6057	1737
0Safe_safe_UNA3_210607.6058	2312
0Safe_safe_UNA3_210612.6063	2973
0Safe_safe_UNA3_210622.6073	1254
0Safe_safe_UNA3_210628.6079	1314
0Safe_safe_UNA3_210633.6084	2035
0Safe_safe_UNA3_210634.6085	1932
0Safe_safe_UNA3_210643.6094	769
0Safe_safe_UNA3_210644.6095	441
0Safe_safe_UNA3_210648.6099	1081
0Safe_safe_UNA3_210676.6127	2058
0Safe_safe_UNA3_210679.6130	1922
0Safe_safe_UNA3_210709.6160	2294
0Safe_safe_UNA3_210711.6162	1856
0Safe_safe_UNA3_210714.6165	1619
0Safe_safe_UNA3_210717.6168	1717
0Safe_safe_UNA3_210719.6170	1575
0Safe_safe_UNA3_210721.6172	2410
0Safe_safe_UNA3_210723.6174	1808
0Safe_safe_UNA3_210725.6176	2085
0Safe_safe_UNA3_210728.6179	1987
0Safe_safe_UNA3_210733.6184	1065
0Safe_safe_UNA3_210737.6188	1699
0Safe_safe_UNA3_210738.6189	1650
0Safe_safe_UNA3_210739.6190	2015
0Safe_safe_UNA3_210753.6204	2164
0Safe_safe_UNA3_210756.6207	1940
0Safe_safe_UNA3_210758.6209	1265
0Safe_safe_UNA3_210759.6210	2529
0Safe_safe_UNA3_210760.6211	1797
0Safe_safe_UNA3_210768.6219	1079
0Safe_safe_UNA3_210772.6223	1011
0Safe_safe_UNA3_210780.6231	2015
0Safe_safe_UNA3_210781.6232	1307
0Safe_safe_UNA3_210785.6236	2324
0Safe_safe_UNA3_210792.6243	1802
0Safe_safe_UNA3_210794.6245	1429
0Safe_safe_UNA3_210797.6248	2451
0Safe_safe_UNA3_210799.6250	1773
0Safe_safe_UNA3_210800.6251	1258
0Safe_safe_UNA3_210804.6255	1527
0Safe_safe_UNA3_210807.6258	1579
0Safe_safe_UNA3_210808.6259	897
0Safe_safe_UNA3_210813.6264	1619
0Safe_safe_UNA3_210814.6265	1548
0Safe_safe_UNA3_210819.6270	1874
0Safe_safe_UNA3_210825.6276	1076
0Safe_safe_UNA3_210840.6291	627
0Safe_safe_UNA3_210845.6296	2335
0Safe_safe_UNA3_210850.6301	1966
0Safe_safe_UNA3_210861.6312	2277
0Safe_safe_UNA3_210867.6318	2261
0Safe_safe_UNA3_210880.6331	1348
0Safe_safe_UNA3_210882.6333	1555
0Safe_safe_UNA3_210889.6340	2309
0Safe_safe_UNA3_210913.6364	1913
0Safe_safe_UNA3_210915.6366	2720
0Safe_safe_UNA3_210936.6387	1440
0Safe_safe_UNA3_210939.6390	1581
0Safe_safe_UNA3_210944.6395	1937
0Safe_safe_UNA3_210947.6398	1772
0Safe_safe_UNA3_210949.6400	426
0Safe_safe_UNA3_210951.6402	1794
0Safe_safe_UNA3_210963.6414	1666
0Safe_safe_UNA3_210969.6420	1603
0Safe_safe_UNA3_210978.6429	1417
0Safe_safe_UNA3_210989.6440	1241
0Safe_safe_UNA3_210995.6446	1154
0Safe_safe_UNA3_211003.6454	843
0Safe_safe_UNA3_211009.6460	706
0Safe_safe_UNA3_211011.6462	1387
0Safe_safe_UNA3_211017.6468	3588
0Safe_safe_UNA3_211022.6473	4138
0Safe_safe_UNA3_211027.6478	1461
0Safe_safe_UNA3_211034.6485	1133
0Safe_safe_UNA3_211037.6488	2953
0Safe_safe_UNA3_211051.6502	1762
0Safe_safe_UNA3_211057.6508	3212
0Safe_safe_UNA3_211063.6514	2141
0Safe_safe_UNA3_211077.6528	2633
0Safe_safe_UNA3_211078.6529	575
0Safe_safe_UNA3_211082.6533	2304
0Safe_safe_UNA3_211086.6537	2135
0Safe_safe_UNA3_211091.6542	2891
0Safe_safe_UNA3_211093.6544	1979
0Safe_safe_UNA3_211100.6551	2094
0Safe_safe_UNA3_211107.6558	1220
0Safe_safe_UNA3_211123.6574	2496
0Safe_safe_UNA3_211129.6580	2176
0Safe_safe_UNA3_211142.6593	1868
0Safe_safe_UNA3_211144.6595	1925
0Safe_safe_UNA3_211149.6600	2591
0Safe_safe_UNA3_211150.6601	1662
0Safe_safe_UNA3_211165.6616	1417
0Safe_safe_UNA3_211166.6617	1982
0Safe_safe_UNA3_211172.6623	1233
0Safe_safe_UNA3_211175.6626	2948
0Safe_safe_UNA3_211183.6634	1472
0Safe_safe_UNA3_211184.6635	1584
0Safe_safe_UNA3_211186.6637	1384
0Safe_safe_UNA3_211187.6638	957
0Safe_safe_UNA3_211188.6639	1839
0Safe_safe_UNA3_211197.6648	1104
0Safe_safe_UNA3_211204.6655	1574
0Safe_safe_UNA3_211217.6668	1888
0Safe_safe_UNA3_211223.6674	1478
0Safe_safe_UNA3_211230.6681	1817
0Safe_safe_UNA3_211231.6682	1610
0Safe_safe_UNA3_211232.6683	3465
0Safe_safe_UNA3_211233.6684	2965
0Safe_safe_UNA3_211242.6693	1408
0Safe_safe_UNA3_211266.6717	1697
0Safe_safe_UNA3_211270.6721	2277
0Safe_safe_UNA3_211271.6722	1008
0Safe_safe_UNA3_211272.6723	1705
0Safe_safe_UNA3_211278.6729	2172
0Safe_safe_UNA3_211290.6741	2539
ABCB11_P1P2_crispri_491	2332
[truncated: 2,887 more rows]

## Sheet: Ricin rep 2
0NONE_na_crispri_205283	1617
0NONE_na_crispri_205288	339
0NONE_na_crispri_205289	804
0NONE_na_crispri_205291	1309
0NONE_na_crispri_205292	956
0NONE_na_crispri_205296	988
0NONE_na_crispri_205298	1229
0NONE_na_crispri_205299	714
0NONE_na_crispri_205300	1008
0NONE_na_crispri_205301	2335
0NONE_na_crispri_205304	1350
0NONE_na_crispri_205305	1580
0NONE_na_crispri_205308	333
0NONE_na_crispri_205313	1543
0NONE_na_crispri_205320	1084
0NONE_na_crispri_205327	1463
0NONE_na_crispri_205330	1294
0NONE_na_crispri_205334	1325
0NONE_na_crispri_205335	1529
0NONE_na_crispri_205336	2056
0NONE_na_crispri_205338	1408
0NONE_na_crispri_205340	520
0NONE_na_crispri_205347	1500
0NONE_na_crispri_205348	1054
0NONE_na_crispri_205353	831
0NONE_na_crispri_205363	1365
0NONE_na_crispri_205364	1030
0NONE_na_crispri_205366	1317
0NONE_na_crispri_205367	1187
0NONE_na_crispri_205369	1541
0NONE_na_crispri_205372	1982
0NONE_na_crispri_205375	1369
0NONE_na_crispri_205376	724
0NONE_na_crispri_205393	1985
0NONE_na_crispri_205395	1368
0NONE_na_crispri_205399	1486
0NONE_na_crispri_205401	1331
0NONE_na_crispri_205403	2130
0NONE_na_crispri_205408	746
0NONE_na_crispri_205415	1458
0NONE_na_crispri_205418	1219
0NONE_na_crispri_205420	762
0NONE_na_crispri_205425	2016
0NONE_na_crispri_205427	1370
0NONE_na_crispri_205436	1147
0NONE_na_crispri_205439	738
0NONE_na_crispri_205442	821
0NONE_na_crispri_205446	653
0NONE_na_crispri_205449	1701
0NONE_na_crispri_205450	743
0NONE_na_crispri_205451	1247
0NONE_na_crispri_205452	1068
0NONE_na_crispri_205458	1393
0NONE_na_crispri_205459	1207
0NONE_na_crispri_205460	1549
0NONE_na_crispri_205463	1788
0NONE_na_crispri_205469	2286
0NONE_na_crispri_205474	309
0NONE_na_crispri_205477	1646
0NONE_na_crispri_205478	795
0NONE_na_crispri_205479	1179
0NONE_na_crispri_205481	2111
0NONE_na_crispri_205484	1455
0NONE_na_crispri_205498	1491
0NONE_na_crispri_205499	1167
0NONE_na_crispri_205512	1343
0NONE_na_crispri_205513	1659
0NONE_na_crispri_205514	1183
0NONE_na_crispri_205524	1578
0NONE_na_crispri_205526	822
0NONE_na_crispri_205530	441
0NONE_na_crispri_205537	986
0NONE_na_crispri_205540	756
0NONE_na_crispri_205546	9
0NONE_na_crispri_205562	497
0NONE_na_crispri_205563	2078
0NONE_na_crispri_205565	1679
0NONE_na_crispri_205566	1147
0NONE_na_crispri_205569	1079
0NONE_na_crispri_205576	1756
0NONE_na_crispri_205588	1003
0NONE_na_crispri_205596	1531
0NONE_na_crispri_205605	2474
0NONE_na_crispri_205606	1713
0NONE_na_crispri_205615	2656
0NONE_na_crispri_205619	1673
0NONE_na_crispri_205624	304
0NONE_na_crispri_205635	1265
0NONE_na_crispri_205639	1368
0NONE_na_crispri_205640	1334
0NONE_na_crispri_205647	2038
0NONE_na_crispri_205648	933
0NONE_na_crispri_205652	465
0NONE_na_crispri_205654	1164
0NONE_na_crispri_205667	974
0NONE_na_crispri_205669	2052
0NONE_na_crispri_205670	2225
0NONE_na_crispri_205672	681
0NONE_na_crispri_205689	1546
0NONE_na_crispri_205690	1200
0NONE_na_crispri_205691	1130
0NONE_na_crispri_205692	1137
0NONE_na_crispri_205695	1898
0NONE_na_crispri_205698	2419
0NONE_na_crispri_205702	1430
0NONE_na_crispri_205704	1147
0NONE_na_crispri_205706	2376
0NONE_na_crispri_205708	1994
0NONE_na_crispri_205709	1120
0NONE_na_crispri_205717	1641
0NONE_na_crispri_205718	1353
0NONE_na_crispri_205723	1061
0NONE_na_crispri_205734	593
0NONE_na_crispri_205736	1228
0NONE_na_crispri_205739	819
0NONE_na_crispri_205743	1529
0NONE_na_crispri_205746	2213
0NONE_na_crispri_205749	2096
0NONE_na_crispri_205750	1664
0NONE_na_crispri_205751	477
0NONE_na_crispri_205759	635
0NONE_na_crispri_205764	795
0NONE_na_crispri_205765	724
0NONE_na_crispri_205769	1493
0NONE_na_crispri_205778	1509
0NONE_na_crispri_205783	880
0NONE_na_crispri_205784	1020
0NONE_na_crispri_205786	718
0NONE_na_crispri_205787	1458
0NONE_na_crispri_205789	1383
0NONE_na_crispri_205790	2333
0NONE_na_crispri_205806	998
0NONE_na_crispri_205807	1574
0NONE_na_crispri_205812	2684
0NONE_na_crispri_205813	1060
0NONE_na_crispri_205814	680
0NONE_na_crispri_205823	1681
0NONE_na_crispri_205825	1085
0NONE_na_crispri_205827	1299
0NONE_na_crispri_205828	1646
0NONE_na_crispri_205829	1792
0NONE_na_crispri_205830	804
0NONE_na_crispri_205833	1075
0NONE_na_crispri_205840	609
0NONE_na_crispri_205842	1334
0NONE_na_crispri_205845	1380
0NONE_na_crispri_205855	1482
0NONE_na_crispri_205856	866
0NONE_na_crispri_205865	802
0NONE_na_crispri_205866	1579
0NONE_na_crispri_205868	1460
0NONE_na_crispri_205874	1114
0NONE_na_crispri_205875	2391
0NONE_na_crispri_205881	1053
0NONE_na_crispri_205894	1969
0NONE_na_crispri_205897	1639
0NONE_na_crispri_205901	1569
0NONE_na_crispri_205903	2192
0NONE_na_crispri_205906	1381
0NONE_na_crispri_205907	1557
0NONE_na_crispri_205908	1458
0NONE_na_crispri_205909	707
0NONE_na_crispri_205911	593
0NONE_na_crispri_205917	1989
0NONE_na_crispri_205927	759
0NONE_na_crispri_205933	1641
0NONE_na_crispri_205934	2016
0NONE_na_crispri_205937	1480
0NONE_na_crispri_205947	1089
0NONE_na_crispri_205949	835
0NONE_na_crispri_205951	1085
0NONE_na_crispri_205955	1338
0NONE_na_crispri_205956	1593
0NONE_na_crispri_205959	911
0NONE_na_crispri_205961	1018
0NONE_na_crispri_205966	2146
0NONE_na_crispri_205973	160
0NONE_na_crispri_205975	765
0NONE_na_crispri_205981	2054
0NONE_na_crispri_205984	1559
0NONE_na_crispri_205985	1814
0NONE_na_crispri_205989	1573
0NONE_na_crispri_205990	1517
0NONE_na_crispri_205992	1234
0NONE_na_crispri_205993	963
0NONE_na_crispri_205994	2030
0NONE_na_crispri_206004	1277
0NONE_na_crispri_206010	1018
0NONE_na_crispri_206014	1379
0NONE_na_crispri_206022	1260
0NONE_na_crispri_206024	1484
0NONE_na_crispri_206027	1317
0NONE_na_crispri_206030	914
0NONE_na_crispri_206032	1099
0NONE_na_crispri_206037	2070
0NONE_na_crispri_206039	2020
0NONE_na_crispri_206040	1525
0NONE_na_crispri_206047	1086
0NONE_na_crispri_206051	1772
0NONE_na_crispri_206054	904
0NONE_na_crispri_206056	800
0NONE_na_crispri_206062	1190
0NONE_na_crispri_206066	944
0NONE_na_crispri_206077	1125
0NONE_na_crispri_206079	98
0NONE_na_crispri_206086	831
0NONE_na_crispri_206092	963
0NONE_na_crispri_206100	1287
0NONE_na_crispri_206101	1753
0NONE_na_crispri_206104	1194
0NONE_na_crispri_206106	1279
0NONE_na_crispri_206107	954
0NONE_na_crispri_206110	2134
0NONE_na_crispri_206113	1431
0NONE_na_crispri_206114	777
0NONE_na_crispri_206117	1128
0NONE_na_crispri_206119	966
0NONE_na_crispri_206123	15
0NONE_na_crispri_206124	1705
0NONE_na_crispri_206128	817
0NONE_na_crispri_206137	915
0NONE_na_crispri_206139	2522
0NONE_na_crispri_206148	1539
0NONE_na_crispri_206149	526
0NONE_na_crispri_206158	1390
0NONE_na_crispri_206166	1773
0NONE_na_crispri_206167	1934
0NONE_na_crispri_206170	1015
0NONE_na_crispri_206173	1967
0NONE_na_crispri_206175	1379
0NONE_na_crispri_206177	1139
0NONE_na_crispri_206180	1003
0NONE_na_crispri_206188	906
0NONE_na_crispri_206189	714
0NONE_na_crispri_206190	1218
0NONE_na_crispri_206191	1837
0NONE_na_crispri_206193	2343
0NONE_na_crispri_206199	994
0NONE_na_crispri_206212	1127
0NONE_na_crispri_206218	1302
0NONE_na_crispri_206219	371
0NONE_na_crispri_206220	1959
0NONE_na_crispri_206231	1338
0NONE_na_crispri_206233	1855
0NONE_na_crispri_206244	676
0NONE_na_crispri_206245	1733
0NONE_na_crispri_206246	1104
0NONE_na_crispri_206251	915
0NONE_na_crispri_206252	2101
0NONE_na_crispri_206253	1203
0NONE_na_crispri_206259	1241
0NONE_na_crispri_206262	1703
0NONE_na_crispri_206263	2083
0NONE_na_crispri_206264	1835
0NONE_na_crispri_206274	1104
0NONE_na_crispri_206276	862
0NONE_na_crispri_206281	1553
0NONE_na_crispri_206284	2068
0NONE_na_crispri_206285	1245
0NONE_na_crispri_206291	934
0NONE_na_crispri_206292	2008
0NONE_na_crispri_206293	1754
0NONE_na_crispri_206294	1409
0NONE_na_crispri_206296	1897
0NONE_na_crispri_206298	1573
0NONE_na_crispri_206307	1181
0NONE_na_crispri_206310	1591
0NONE_na_crispri_206312	935
0NONE_na_crispri_206317	1297
0NONE_na_crispri_206319	1965
0NONE_na_crispri_206321	1506
0NONE_na_crispri_206324	1425
0NONE_na_crispri_206331	1462
0NONE_na_crispri_206332	1128
0NONE_na_crispri_206335	1246
0NONE_na_crispri_206336	813
0NONE_na_crispri_206338	2013
0NONE_na_crispri_206345	1064
0NONE_na_crispri_206346	1439
0NONE_na_crispri_206347	1300
0NONE_na_crispri_206351	1283
0NONE_na_crispri_206353	698
0NONE_na_crispri_206355	2052
0NONE_na_crispri_206358	1490
0NONE_na_crispri_206361	1444
0NONE_na_crispri_206364	1828
0NONE_na_crispri_206369	701
0NONE_na_crispri_206370	1850
0NONE_na_crispri_206371	1298
0NONE_na_crispri_206373	2559
0NONE_na_crispri_206374	1512
0NONE_na_crispri_206378	1175
0NONE_na_crispri_206379	1669
0NONE_na_crispri_206383	2359
0NONE_na_crispri_206388	1835
0NONE_na_crispri_206390	2500
0NONE_na_crispri_206392	1658
0NONE_na_crispri_206397	42
0NONE_na_crispri_206398	1321
0NONE_na_crispri_206412	812
0NONE_na_crispri_206417	1421
0NONE_na_crispri_206425	1028
0NONE_na_crispri_206436	1788
0NONE_na_crispri_206438	1703
0NONE_na_crispri_206439	1344
0NONE_na_crispri_206443	874
0NONE_na_crispri_206444	927
0NONE_na_crispri_206449	1799
0NONE_na_crispri_206453	1303
0NONE_na_crispri_206454	1873
0NONE_na_crispri_206457	1219
0NONE_na_crispri_206459	1162
0NONE_na_crispri_206460	1666
0NONE_na_crispri_206462	1128
0NONE_na_crispri_206463	555
0NONE_na_crispri_206465	1613
0NONE_na_crispri_206466	1638
0NONE_na_crispri_206475	1799
0NONE_na_crispri_206480	1544
0NONE_na_crispri_206481	2093
0NONE_na_crispri_206484	840
0NONE_na_crispri_206485	1718
0NONE_na_crispri_206486	1690
0NONE_na_crispri_206493	1346
0NONE_na_crispri_206496	1082
0NONE_na_crispri_206500	1169
0NONE_na_crispri_206505	585
0NONE_na_crispri_206506	298
0NONE_na_crispri_206507	2077
0NONE_na_crispri_206514	915
0NONE_na_crispri_206517	1664
0NONE_na_crispri_206520	536
0NONE_na_crispri_206524	1322
0NONE_na_crispri_206530	1173
0NONE_na_crispri_206534	1282
0NONE_na_crispri_206537	1574
0NONE_na_crispri_206542	1116
0NONE_na_crispri_206549	1432
0NONE_na_crispri_206555	848
0NONE_na_crispri_206556	1943
0NONE_na_crispri_206558	1348
0NONE_na_crispri_206560	1125
0NONE_na_crispri_206562	3099
0NONE_na_crispri_206567	1270
0NONE_na_crispri_206573	1350
0NONE_na_crispri_206575	754
0NONE_na_crispri_206579	1980
0NONE_na_crispri_206583	684
0NONE_na_crispri_206584	1458
0NONE_na_crispri_206585	1782
0NONE_na_crispri_206592	2062
0NONE_na_crispri_206597	1245
0NONE_na_crispri_206598	2057
0NONE_na_crispri_206607	1799
0NONE_na_crispri_206611	99
0NONE_na_crispri_206613	1010
0NONE_na_crispri_206622	1052
0NONE_na_crispri_206625	1011
0NONE_na_crispri_206633	743
0NONE_na_crispri_206634	1832
0NONE_na_crispri_206639	2119
0NONE_na_crispri_206642	925
0NONE_na_crispri_206647	1142
0NONE_na_crispri_206652	1351
0NONE_na_crispri_206657	1322
0NONE_na_crispri_206659	891
0NONE_na_crispri_206667	1219
0NONE_na_crispri_206670	1890
0NONE_na_crispri_206675	1388
0NONE_na_crispri_206681	1389
0NONE_na_crispri_206683	1057
0NONE_na_crispri_206694	765
0NONE_na_crispri_206695	2138
0NONE_na_crispri_206697	966
0NONE_na_crispri_206699	456
0NONE_na_crispri_206701	1203
0NONE_na_crispri_206702	1037
0NONE_na_crispri_206704	1023
0NONE_na_crispri_206709	983
0NONE_na_crispri_206710	846
0NONE_na_crispri_206723	1290
0NONE_na_crispri_206728	964
0NONE_na_crispri_206729	1676
0NONE_na_crispri_206730	1210
0NONE_na_crispri_206741	1618
0NONE_na_crispri_206754	1184
0NONE_na_crispri_206756	272
0NONE_na_crispri_206757	643
0NONE_na_crispri_206760	1657
0NONE_na_crispri_206764	825
0NONE_na_crispri_206765	1651
0NONE_na_crispri_206766	1530
0NONE_na_crispri_206767	1462
0NONE_na_crispri_206773	951
0NONE_na_crispri_206774	1071
0NONE_na_crispri_206777	1305
0NONE_na_crispri_206778	1021
0NONE_na_crispri_206781	1667
0NONE_na_crispri_206782	123
0NONE_na_crispri_206784	1002
0NONE_na_crispri_206787	467
0NONE_na_crispri_206806	1140
0NONE_na_crispri_206809	1705
0NONE_na_crispri_206812	1310
0NONE_na_crispri_206815	1342
0NONE_na_crispri_206821	1598
0NONE_na_crispri_206822	1819
0NONE_na_crispri_206823	1315
0NONE_na_crispri_206824	2246
0NONE_na_crispri_206825	600
0NONE_na_crispri_206826	440
0NONE_na_crispri_206829	1601
0NONE_na_crispri_206831	1331
0NONE_na_crispri_206834	1221
0NONE_na_crispri_206840	1249
0NONE_na_crispri_206844	1818
0NONE_na_crispri_206848	1512
0NONE_na_crispri_206852	1050
0NONE_na_crispri_206854	2341
0NONE_na_crispri_206856	1414
0NONE_na_crispri_206860	1271
0NONE_na_crispri_206861	2063
0NONE_na_crispri_206862	1742
0NONE_na_crispri_206865	1659
0NONE_na_crispri_206866	1596
0NONE_na_crispri_206869	1373
0NONE_na_crispri_206872	2087
0NONE_na_crispri_206878	588
0NONE_na_crispri_206879	1312
0NONE_na_crispri_206882	2331
0NONE_na_crispri_206885	1209
0NONE_na_crispri_206897	1713
0NONE_na_crispri_206903	2208
0NONE_na_crispri_206904	1371
0NONE_na_crispri_206906	1000
0NONE_na_crispri_206909	961
0NONE_na_crispri_206910	1644
0NONE_na_crispri_206914	1987
0NONE_na_crispri_206917	447
0NONE_na_crispri_206919	959
0NONE_na_crispri_206920	1622
0NONE_na_crispri_206923	1042
0NONE_na_crispri_206926	496
0NONE_na_crispri_206929	609
0NONE_na_crispri_206933	944
0NONE_na_crispri_206935	804
0NONE_na_crispri_206936	958
0NONE_na_crispri_206938	1192
0NONE_na_crispri_206945	1627
0NONE_na_crispri_206946	1958
0NONE_na_crispri_206947	943
0NONE_na_crispri_206949	2222
0NONE_na_crispri_206954	2610
0NONE_na_crispri_206956	884
0NONE_na_crispri_206958	1488
0NONE_na_crispri_206962	1386
0NONE_na_crispri_206963	1282
0NONE_na_crispri_206965	1285
0NONE_na_crispri_206972	1203
0NONE_na_crispri_206976	1315
0NONE_na_crispri_206985	1322
0NONE_na_crispri_206991	869
0NONE_na_crispri_206992	2856
0NONE_na_crispri_206993	817
0NONE_na_crispri_207005	949
0NONE_na_crispri_207007	1114
0NONE_na_crispri_207008	1068
0NONE_na_crispri_207016	2537
0NONE_na_crispri_207019	1370
0NONE_na_crispri_207021	1390
0NONE_na_crispri_207022	1122
0NONE_na_crispri_207029	428
0NONE_na_crispri_207043	1426
0NONE_na_crispri_207044	2704
0NONE_na_crispri_207053	873
0NONE_na_crispri_207059	476
0NONE_na_crispri_207063	1482
0NONE_na_crispri_207069	1740
0NONE_na_crispri_207070	1661
0NONE_na_crispri_207074	1422
0NONE_na_crispri_207080	879
0NONE_na_crispri_207084	1269
0NONE_na_crispri_207090	1742
0NONE_na_crispri_207103	1638
0NONE_na_crispri_207108	1625
0NONE_na_crispri_207110	1879
0NONE_na_crispri_207118	1024
0NONE_na_crispri_207119	2008
0NONE_na_crispri_207126	1274
0NONE_na_crispri_207128	1008
0NONE_na_crispri_207131	941
0NONE_na_crispri_207132	1196
0NONE_na_crispri_207140	1607
0NONE_na_crispri_207141	813
0NONE_na_crispri_207144	987
0NONE_na_crispri_207147	855
0NONE_na_crispri_207149	1557
0NONE_na_crispri_207154	567
0NONE_na_crispri_207158	1629
0NONE_na_crispri_207160	719
0NONE_na_crispri_207162	1747
0NONE_na_crispri_207163	1744
0NONE_na_crispri_207173	1225
0NONE_na_crispri_207183	1544
0NONE_na_crispri_207185	1757
0NONE_na_crispri_207186	1040
0NONE_na_crispri_207187	768
0NONE_na_crispri_207192	1704
0NONE_na_crispri_207196	1173
0NONE_na_crispri_207200	952
0NONE_na_crispri_207203	1229
0NONE_na_crispri_207204	824
0NONE_na_crispri_207206	1833
0NONE_na_crispri_207208	1451
0NONE_na_crispri_207211	2228
0NONE_na_crispri_207212	1114
0NONE_na_crispri_207213	1289
0NONE_na_crispri_207214	1175
0NONE_na_crispri_207215	949
0NONE_na_crispri_207216	708
0NONE_na_crispri_207218	795
0NONE_na_crispri_207219	1857
0NONE_na_crispri_207222	822
0NONE_na_crispri_207224	1176
0NONE_na_crispri_207225	1351
0NONE_na_crispri_207226	869
0NONE_na_crispri_207228	970
0NONE_na_crispri_207230	1195
0NONE_na_crispri_207239	1483
0NONE_na_crispri_207245	1741
0NONE_na_crispri_207257	1176
0NONE_na_crispri_207271	928
0NONE_na_crispri_207272	1392
0NONE_na_crispri_207273	2056
0NONE_na_crispri_207274	703
0NONE_na_crispri_207282	1672
0NONE_na_crispri_207289	820
0NONE_na_crispri_207297	1951
0NONE_na_crispri_207300	1251
0NONE_na_crispri_207302	903
0NONE_na_crispri_207305	1241
0NONE_na_crispri_207318	2859
0NONE_na_crispri_207319	648
0NONE_na_crispri_207330	778
0NONE_na_crispri_207334	1705
0NONE_na_crispri_207338	967
0NONE_na_crispri_207339	838
0NONE_na_crispri_207348	660
0NONE_na_crispri_207351	1515
0NONE_na_crispri_207354	1142
0NONE_na_crispri_207355	1676
0NONE_na_crispri_207356	884
0NONE_na_crispri_207363	809
0NONE_na_crispri_207366	1177
0NONE_na_crispri_207370	1867
0NONE_na_crispri_207371	732
0NONE_na_crispri_207372	1812
0NONE_na_crispri_207373	1589
0NONE_na_crispri_207375	1705
0NONE_na_crispri_207389	1538
0NONE_na_crispri_207390	1145
0NONE_na_crispri_207394	1626
0NONE_na_crispri_207395	2473
0NONE_na_crispri_207400	1341
0NONE_na_crispri_207406	1909
0NONE_na_crispri_207408	1399
0NONE_na_crispri_207413	1794
0NONE_na_crispri_207427	923
0NONE_na_crispri_207428	1209
0NONE_na_crispri_207431	945
0NONE_na_crispri_207432	816
0NONE_na_crispri_207434	1624
0NONE_na_crispri_207435	1721
0NONE_na_crispri_207437	1309
0NONE_na_crispri_207444	1059
0NONE_na_crispri_207450	2291
0NONE_na_crispri_207452	584
0NONE_na_crispri_207457	1825
0NONE_na_crispri_207459	1495
0NONE_na_crispri_207461	1761
0NONE_na_crispri_207462	1001
0NONE_na_crispri_207468	1080
0NONE_na_crispri_207471	1226
0NONE_na_crispri_207475	1040
0NONE_na_crispri_207479	1847
0NONE_na_crispri_207482	556
0NONE_na_crispri_207483	901
0NONE_na_crispri_207487	1547
0NONE_na_crispri_207489	1718
0NONE_na_crispri_207493	1141
0NONE_na_crispri_207494	1136
0NONE_na_crispri_207508	598
0NONE_na_crispri_207510	1272
0NONE_na_crispri_207511	1731
0NONE_na_crispri_207512	1633
0NONE_na_crispri_207514	1058
0NONE_na_crispri_207516	478
0NONE_na_crispri_207522	449
0NONE_na_crispri_207534	783
0NONE_na_crispri_207542	2011
0NONE_na_crispri_207553	602
0NONE_na_crispri_207555	1807
0NONE_na_crispri_207560	1287
0NONE_na_crispri_207566	1642
0NONE_na_crispri_207570	1221
0NONE_na_crispri_207571	1490
0NONE_na_crispri_207576	1747
0NONE_na_crispri_207582	1465
0NONE_na_crispri_207589	638
0NONE_na_crispri_207590	1002
0NONE_na_crispri_207597	1362
0NONE_na_crispri_207599	833
0NONE_na_crispri_207602	1689
0NONE_na_crispri_207608	869
0NONE_na_crispri_207613	1310
0NONE_na_crispri_207614	2346
0NONE_na_crispri_207615	1332
0NONE_na_crispri_207617	1320
0NONE_na_crispri_207618	770
0NONE_na_crispri_207627	1966
0NONE_na_crispri_207631	1555
0NONE_na_crispri_207632	1320
0NONE_na_crispri_207636	1228
0NONE_na_crispri_207637	1086
0NONE_na_crispri_207639	1015
0NONE_na_crispri_207640	957
0NONE_na_crispri_207641	511
0NONE_na_crispri_207642	1490
0NONE_na_crispri_207643	1497
0NONE_na_crispri_207644	1859
0NONE_na_crispri_207646	1303
0NONE_na_crispri_207647	2542
0NONE_na_crispri_207649	1098
0NONE_na_crispri_207655	1536
0NONE_na_crispri_207658	976
0NONE_na_crispri_207660	739
0NONE_na_crispri_207662	1276
0NONE_na_crispri_207669	1400
0NONE_na_crispri_207672	1507
0NONE_na_crispri_207673	1166
0NONE_na_crispri_207679	326
0NONE_na_crispri_207684	1678
0NONE_na_crispri_207694	731
0NONE_na_crispri_207696	1068
0NONE_na_crispri_207704	1580
0NONE_na_crispri_207709	1582
0NONE_na_crispri_207710	1576
0NONE_na_crispri_207711	1568
0NONE_na_crispri_207721	181
0NONE_na_crispri_207728	1157
0NONE_na_crispri_207740	1524
0NONE_na_crispri_207743	1358
0NONE_na_crispri_207744	244
0NONE_na_crispri_207747	1647
0NONE_na_crispri_207753	447
0NONE_na_crispri_207757	1756
0NONE_na_crispri_207771	478
0NONE_na_crispri_207774	279
0NONE_na_crispri_207777	1116
0NONE_na_crispri_207778	1167
0NONE_na_crispri_207780	1266
0NONE_na_crispri_207786	1716
0NONE_na_crispri_207788	1903
0NONE_na_crispri_207789	1696
0NONE_na_crispri_207793	961
0NONE_na_crispri_207800	1839
0NONE_na_crispri_207803	663
0NONE_na_crispri_207804	1421
0NONE_na_crispri_207805	1190
0NONE_na_crispri_207809	655
0NONE_na_crispri_207813	741
0NONE_na_crispri_207814	1823
0NONE_na_crispri_207817	1088
0NONE_na_crispri_207819	745
0NONE_na_crispri_207820	507
0NONE_na_crispri_207821	1030
0NONE_na_crispri_207824	742
0NONE_na_crispri_207830	1196
0NONE_na_crispri_207833	1338
0NONE_na_crispri_207834	1819
0NONE_na_crispri_207837	1273
0NONE_na_crispri_207838	1260
0NONE_na_crispri_207839	1057
0NONE_na_crispri_207843	578
0NONE_na_crispri_207844	1855
0NONE_na_crispri_207845	1119
0NONE_na_crispri_207852	1399
0NONE_na_crispri_207853	206
0NONE_na_crispri_207857	1374
0NONE_na_crispri_207859	1072
0NONE_na_crispri_207870	1203
0NONE_na_crispri_207874	1233
0NONE_na_crispri_207875	770
0NONE_na_crispri_207876	1397
0NONE_na_crispri_207878	1046
0NONE_na_crispri_207882	1826
0NONE_na_crispri_207889	1405
0NONE_na_crispri_207891	1324
0NONE_na_crispri_207893	1300
0NONE_na_crispri_207897	1967
0NONE_na_crispri_207900	1114
0NONE_na_crispri_207902	1002
0NONE_na_crispri_207909	1426
0NONE_na_crispri_207912	2955
0NONE_na_crispri_207913	881
0NONE_na_crispri_207914	1079
0NONE_na_crispri_207915	1965
0NONE_na_crispri_207916	142
0NONE_na_crispri_207917	1111
0NONE_na_crispri_207918	1729
0NONE_na_crispri_207928	1140
0NONE_na_crispri_207931	2666
0NONE_na_crispri_207937	1811
0NONE_na_crispri_207942	1223
0NONE_na_crispri_207944	1385
0NONE_na_crispri_207945	1389
0NONE_na_crispri_207946	1078
0NONE_na_crispri_207948	1387
0NONE_na_crispri_207952	731
0NONE_na_crispri_207956	796
0NONE_na_crispri_207958	1174
0NONE_na_crispri_207960	1163
0NONE_na_crispri_207961	1980
0NONE_na_crispri_207971	1259
0NONE_na_crispri_207975	1314
0NONE_na_crispri_207977	1714
0NONE_na_crispri_207978	1443
0NONE_na_crispri_207982	597
0NONE_na_crispri_207985	2027
0NONE_na_crispri_207991	1346
0NONE_na_crispri_207995	771
0NONE_na_crispri_208000	1286
0NONE_na_crispri_208003	2299
0NONE_na_crispri_208004	1029
0NONE_na_crispri_208011	1733
0NONE_na_crispri_208016	713
0NONE_na_crispri_208018	920
0NONE_na_crispri_208019	2112
0NONE_na_crispri_208020	1360
0NONE_na_crispri_208027	1739
0NONE_na_crispri_208030	1252
0NONE_na_crispri_208040	1569
0NONE_na_crispri_208042	3177
0NONE_na_crispri_208044	1301
0NONE_na_crispri_208045	537
0NONE_na_crispri_208046	1869
0NONE_na_crispri_208047	1616
0NONE_na_crispri_208050	953
0NONE_na_crispri_208059	1348
0NONE_na_crispri_208060	793
0NONE_na_crispri_208063	919
0NONE_na_crispri_208068	268
0NONE_na_crispri_208069	920
0NONE_na_crispri_208071	869
0NONE_na_crispri_208072	1864
0NONE_na_crispri_208081	1828
0NONE_na_crispri_208082	810
0NONE_na_crispri_208083	1987
0NONE_na_crispri_208085	2118
0NONE_na_crispri_208087	1708
0NONE_na_crispri_208091	1661
0NONE_na_crispri_208092	2536
0NONE_na_crispri_208093	289
0NONE_na_crispri_208103	1908
0NONE_na_crispri_208107	1160
0NONE_na_crispri_208110	2172
0NONE_na_crispri_208118	1098
0NONE_na_crispri_208120	1466
0NONE_na_crispri_208123	1006
0NONE_na_crispri_208127	1466
0NONE_na_crispri_208131	996
0NONE_na_crispri_208135	1199
0NONE_na_crispri_208138	1307
0NONE_na_crispri_208139	2064
0NONE_na_crispri_208140	1178
0NONE_na_crispri_208142	929
0NONE_na_crispri_208174	795
0NONE_na_crispri_208175	1513
0NONE_na_crispri_208177	935
0NONE_na_crispri_208180	756
0NONE_na_crispri_208181	1628
0NONE_na_crispri_208184	1161
0NONE_na_crispri_208186	1422
0NONE_na_crispri_208191	924
0NONE_na_crispri_208198	1185
0NONE_na_crispri_208202	1490
0NONE_na_crispri_208206	371
0NONE_na_crispri_208212	754
0NONE_na_crispri_208219	1601
0NONE_na_crispri_208224	1076
0NONE_na_crispri_208229	2916
0NONE_na_crispri_208236	600
0NONE_na_crispri_208237	928
0NONE_na_crispri_208241	1321
0NONE_na_crispri_208255	1581
0NONE_na_crispri_208259	1151
0NONE_na_crispri_208261	3169
0NONE_na_crispri_208265	1464
0NONE_na_crispri_208267	1337
0NONE_na_crispri_208277	2444
0NONE_na_crispri_208278	1776
0NONE_na_crispri_208279	253
0NONE_na_crispri_208290	2309
0NONE_na_crispri_208294	1077
0NONE_na_crispri_208296	1216
0NONE_na_crispri_208297	1813
0NONE_na_crispri_208301	1281
0NONE_na_crispri_208308	1591
0NONE_na_crispri_208310	1035
0NONE_na_crispri_208313	1576
0NONE_na_crispri_208321	1443
0NONE_na_crispri_208330	984
0NONE_na_crispri_208331	2395
0NONE_na_crispri_208336	1424
0NONE_na_crispri_208339	1067
0NONE_na_crispri_208342	420
0NONE_na_crispri_208343	1387
0NONE_na_crispri_208345	2694
0NONE_na_crispri_208351	1054
0NONE_na_crispri_208371	1180
0NONE_na_crispri_208377	2393
0NONE_na_crispri_208381	1380
0NONE_na_crispri_208383	662
0NONE_na_crispri_208385	1973
0NONE_na_crispri_208386	1069
0NONE_na_crispri_208396	159
0NONE_na_crispri_208399	1322
0NONE_na_crispri_208403	1208
0NONE_na_crispri_208409	1488
0NONE_na_crispri_208417	1882
0NONE_na_crispri_208429	667
0NONE_na_crispri_208434	1853
0NONE_na_crispri_208440	2155
0NONE_na_crispri_208446	1281
0NONE_na_crispri_208449	1541
0NONE_na_crispri_208455	2037
0NONE_na_crispri_208457	1371
0NONE_na_crispri_208463	1536
0NONE_na_crispri_208464	1898
0NONE_na_crispri_208465	3224
0NONE_na_crispri_208471	1837
0NONE_na_crispri_208473	806
0NONE_na_crispri_208476	921
0NONE_na_crispri_208482	1361
0NONE_na_crispri_208485	979
0NONE_na_crispri_208487	1445
0NONE_na_crispri_208488	858
0NONE_na_crispri_208490	1150
0NONE_na_crispri_208492	958
0NONE_na_crispri_208493	898
0NONE_na_crispri_208495	1012
0NONE_na_crispri_208500	1419
0NONE_na_crispri_208505	1251
0NONE_na_crispri_208514	1322
0NONE_na_crispri_208515	1353
0NONE_na_crispri_208518	985
0NONE_na_crispri_208521	544
0NONE_na_crispri_208533	57
0NONE_na_crispri_208536	1121
0NONE_na_crispri_208543	2163
0NONE_na_crispri_208546	1482
0NONE_na_crispri_208547	1638
0NONE_na_crispri_208548	285
0NONE_na_crispri_208558	1550
0NONE_na_crispri_208559	1462
0NONE_na_crispri_208560	3895
0NONE_na_crispri_208561	1867
0NONE_na_crispri_208564	1984
0NONE_na_crispri_208565	639
0NONE_na_crispri_208569	1099
0NONE_na_crispri_208572	1099
0NONE_na_crispri_208575	659
0NONE_na_crispri_208578	1201
0NONE_na_crispri_208588	1825
0NONE_na_crispri_208589	1056
0NONE_na_crispri_208590	1759
0NONE_na_crispri_208608	15
0NONE_na_crispri_208610	2317
0NONE_na_crispri_208615	1870
0NONE_na_crispri_208616	1223
0NONE_na_crispri_208618	2016
0NONE_na_crispri_208619	1321
0NONE_na_crispri_208621	1571
0NONE_na_crispri_208627	1066
0NONE_na_crispri_208629	872
0NONE_na_crispri_208633	1110
0NONE_na_crispri_208637	766
0NONE_na_crispri_208640	2287
0NONE_na_crispri_208644	2120
0NONE_na_crispri_208646	1185
0NONE_na_crispri_208650	2128
0NONE_na_crispri_208652	890
0NONE_na_crispri_208659	723
0NONE_na_crispri_208660	1506
0NONE_na_crispri_208662	2214
0NONE_na_crispri_208665	1919
0NONE_na_crispri_208671	2300
0NONE_na_crispri_208678	2054
0NONE_na_crispri_208681	1114
0NONE_na_crispri_208685	1898
0NONE_na_crispri_208687	1583
0NONE_na_crispri_208689	1364
0NONE_na_crispri_208691	1081
0NONE_na_crispri_208694	41
0NONE_na_crispri_208700	1488
0NONE_na_crispri_208701	1508
0NONE_na_crispri_208702	2466
0NONE_na_crispri_208703	1138
0NONE_na_crispri_208707	1640
0NONE_na_crispri_208708	1629
0NONE_na_crispri_208715	891
0NONE_na_crispri_208717	1158
0NONE_na_crispri_208720	863
0NONE_na_crispri_208724	1032
0NONE_na_crispri_208734	1381
0NONE_na_crispri_208740	1529
0NONE_na_crispri_208747	910
0NONE_na_crispri_208750	1288
0NONE_na_crispri_208753	915
0NONE_na_crispri_208756	691
0NONE_na_crispri_208758	941
0NONE_na_crispri_208763	824
0NONE_na_crispri_208766	1540
0NONE_na_crispri_208776	1196
0NONE_na_crispri_208777	1114
0NONE_na_crispri_208791	410
0NONE_na_crispri_208796	1867
0NONE_na_crispri_208799	2015
0NONE_na_crispri_208803	940
0NONE_na_crispri_208804	1311
0NONE_na_crispri_208805	2679
0NONE_na_crispri_208808	1402
0NONE_na_crispri_208810	1606
0NONE_na_crispri_208812	1755
0NONE_na_crispri_208813	1556
0NONE_na_crispri_208818	1228
0NONE_na_crispri_208819	1738
0NONE_na_crispri_208833	569
0NONE_na_crispri_208834	1317
0NONE_na_crispri_208837	1477
0NONE_na_crispri_208839	1331
0NONE_na_crispri_208842	1381
0NONE_na_crispri_208843	787
0NONE_na_crispri_208849	1207
0NONE_na_crispri_208850	343
0NONE_na_crispri_208852	965
0NONE_na_crispri_208859	1093
0NONE_na_crispri_208861	1089
0NONE_na_crispri_208871	1717
0NONE_na_crispri_208874	850
0NONE_na_crispri_208877	1496
0NONE_na_crispri_208882	1686
0NONE_na_crispri_208901	1176
0NONE_na_crispri_208902	1635
0NONE_na_crispri_208903	1104
0NONE_na_crispri_208904	1686
0NONE_na_crispri_208906	1494
0NONE_na_crispri_208907	992
0NONE_na_crispri_208909	810
0NONE_na_crispri_208910	1307
0NONE_na_crispri_208912	1580
0NONE_na_crispri_208914	794
0NONE_na_crispri_208918	550
0NONE_na_crispri_208926	2017
0NONE_na_crispri_208927	2658
0NONE_na_crispri_208929	1063
0NONE_na_crispri_208931	136
0NONE_na_crispri_208934	160
0NONE_na_crispri_208936	2086
0NONE_na_crispri_208938	1249
0NONE_na_crispri_208944	1683
0NONE_na_crispri_208954	1013
0NONE_na_crispri_208958	837
0NONE_na_crispri_208963	1198
0NONE_na_crispri_208969	1036
0NONE_na_crispri_208974	2145
0NONE_na_crispri_208977	841
0NONE_na_crispri_208978	1006
0NONE_na_crispri_208992	1401
0NONE_na_crispri_208996	1719
0NONE_na_crispri_209000	1749
0NONE_na_crispri_209004	1963
0NONE_na_crispri_209006	2132
0NONE_na_crispri_209014	789
0NONE_na_crispri_209016	1198
0NONE_na_crispri_209018	1055
0NONE_na_crispri_209021	793
0NONE_na_crispri_209022	1432
0NONE_na_crispri_209027	1219
0NONE_na_crispri_209030	888
0NONE_na_crispri_209033	1166
0NONE_na_crispri_209034	1472
0NONE_na_crispri_209036	2431
0NONE_na_crispri_209038	1278
0NONE_na_crispri_209042	1137
0NONE_na_crispri_209064	1135
0NONE_na_crispri_209065	1517
0NONE_na_crispri_209068	977
0Safe_safe_ACOC_204555.4506	2242
0Safe_safe_ACOC_204560.4511	3125
0Safe_safe_ACOC_204571.4522	2192
0Safe_safe_ACOC_204575.4526	635
0Safe_safe_ACOC_204590.4541	1977
0Safe_safe_ACOC_204599.4550	1295
0Safe_safe_ACOC_204608.4559	1102
0Safe_safe_ACOC_204611.4562	1737
0Safe_safe_ACOC_204625.4576	1658
0Safe_safe_ACOC_204627.4578	1399
0Safe_safe_ACOC_204629.4580	1599
0Safe_safe_ACOC_204632.4583	2511
0Safe_safe_ACOC_204663.4614	2945
0Safe_safe_ACOC_204669.4620	858
0Safe_safe_ACOC_204672.4623	2084
0Safe_safe_ACOC_204678.4629	232
0Safe_safe_ACOC_204679.4630	1769
0Safe_safe_ACOC_204680.4631	1884
0Safe_safe_ACOC_204684.4635	3107
0Safe_safe_ACOC_204715.4666	1395
0Safe_safe_ACOC_204720.4671	3086
0Safe_safe_ACOC_204731.4682	1418
0Safe_safe_ACOC_204737.4688	2507
0Safe_safe_ACOC_204740.4691	1908
0Safe_safe_ACOC_204745.4696	1604
0Safe_safe_ACOC_204746.4697	1248
0Safe_safe_ACOC_204749.4700	1187
0Safe_safe_ACOC_204764.4715	2004
0Safe_safe_ACOC_204770.4721	2601
0Safe_safe_ACOC_204772.4723	2943
0Safe_safe_ACOC_204785.4736	1254
0Safe_safe_ACOC_204788.4739	2777
0Safe_safe_ACOC_204790.4741	2249
0Safe_safe_ACOC_204800.4751	1923
0Safe_safe_ACOC_204802.4753	1395
0Safe_safe_ACOC_204808.4759	896
0Safe_safe_ACOC_204809.4760	2856
0Safe_safe_ACOC_204825.4776	2228
0Safe_safe_ACOC_204827.4778	2246
0Safe_safe_ACOC_204850.4801	1921
0Safe_safe_ACOC_204854.4805	1739
0Safe_safe_ACOC_204872.4823	954
0Safe_safe_ACOC_204876.4827	1964
0Safe_safe_ACOC_204877.4828	2075
0Safe_safe_ACOC_204887.4838	1852
0Safe_safe_ACOC_204889.4840	1659
0Safe_safe_ACOC_204891.4842	1277
0Safe_safe_ACOC_204905.4856	1333
0Safe_safe_ACOC_204906.4857	1640
0Safe_safe_ACOC_204910.4861	1478
0Safe_safe_ACOC_204921.4872	2401
0Safe_safe_ACOC_204930.4881	1609
0Safe_safe_ACOC_204934.4885	1517
0Safe_safe_ACOC_204937.4888	1396
0Safe_safe_ACOC_204941.4892	1548
0Safe_safe_ACOC_204947.4898	1512
0Safe_safe_ACOC_204950.4901	1745
0Safe_safe_ACOC_204958.4909	1512
0Safe_safe_ACOC_204960.4911	2351
0Safe_safe_ACOC_204964.4915	2097
0Safe_safe_ACOC_204965.4916	2070
0Safe_safe_ACOC_204975.4926	2054
0Safe_safe_ACOC_205005.4956	1945
0Safe_safe_ACOC_205024.4975	2170
0Safe_safe_ACOC_205030.4981	2105
0Safe_safe_ACOC_205036.4987	1621
0Safe_safe_ACOC_205038.4989	1358
0Safe_safe_ACOC_205049.5000	1003
0Safe_safe_ACOC_205050.5001	3607
0Safe_safe_ACOC_205053.5004	2735
0Safe_safe_ACOC_205060.5011	1397
0Safe_safe_ACOC_205064.5015	1650
0Safe_safe_ACOC_205065.5016	2515
0Safe_safe_ACOC_205066.5017	2044
0Safe_safe_ACOC_205072.5023	1797
0Safe_safe_ACOC_205080.5031	1377
0Safe_safe_ACOC_205084.5035	1739
0Safe_safe_ACOC_205094.5045	1319
0Safe_safe_ACOC_205100.5051	1728
0Safe_safe_ACOC_205107.5058	1332
0Safe_safe_ACOC_205109.5060	1725
0Safe_safe_ACOC_205129.5080	1687
0Safe_safe_ACOC_205133.5084	1410
0Safe_safe_ACOC_205135.5086	1508
0Safe_safe_ACOC_205137.5088	2231
0Safe_safe_ACOC_205139.5090	2103
0Safe_safe_ACOC_205142.5093	3039
0Safe_safe_ACOC_205144.5095	2661
0Safe_safe_ACOC_205150.5101	2583
0Safe_safe_ACOC_205162.5113	1677
0Safe_safe_ACOC_205163.5114	2280
0Safe_safe_ACOC_205174.5125	2721
0Safe_safe_ACOC_205189.5140	2304
0Safe_safe_ACOC_205192.5143	1761
0Safe_safe_ACOC_205196.5147	2012
0Safe_safe_ACOC_205201.5152	1421
0Safe_safe_ACOC_205211.5162	1641
0Safe_safe_ACOC_205221.5172	2258
0Safe_safe_ACOC_205237.5188	1464
0Safe_safe_ACOC_205243.5194	1354
0Safe_safe_ACOC_205250.5201	1336
0Safe_safe_ACOC_205261.5212	1746
0Safe_safe_ACOC_205265.5216	2344
0Safe_safe_ACOC_205270.5221	1139
0Safe_safe_ACOC_205272.5223	1770
0Safe_safe_ACOC_205278.5229	1863
0Safe_safe_ACOC_205285.5236	1527
0Safe_safe_ACOC_205297.5248	1764
0Safe_safe_ACOC_205299.5250	1766
0Safe_safe_DTKP_205310.5261	1830
0Safe_safe_DTKP_205314.5265	1781
0Safe_safe_DTKP_205318.5269	1263
0Safe_safe_DTKP_205319.5270	2239
0Safe_safe_DTKP_205324.5275	2439
0Safe_safe_DTKP_205325.5276	2052
0Safe_safe_DTKP_205340.5291	2170
0Safe_safe_DTKP_205341.5292	2302
0Safe_safe_DTKP_205342.5293	1722
0Safe_safe_DTKP_205343.5294	855
0Safe_safe_DTKP_205348.5299	1083
0Safe_safe_DTKP_205368.5319	1008
0Safe_safe_DTKP_205373.5324	1964
0Safe_safe_DTKP_205380.5331	2549
0Safe_safe_DTKP_205390.5341	1904
0Safe_safe_DTKP_205391.5342	1560
0Safe_safe_DTKP_205392.5343	2544
0Safe_safe_DTKP_205393.5344	267
0Safe_safe_DTKP_205411.5362	1318
0Safe_safe_DTKP_205422.5373	1496
0Safe_safe_DTKP_205423.5374	1619
0Safe_safe_DTKP_205424.5375	1806
0Safe_safe_DTKP_205448.5399	2167
0Safe_safe_DTKP_205449.5400	1982
0Safe_safe_DTKP_205477.5428	2354
0Safe_safe_DTKP_205480.5431	2089
0Safe_safe_DTKP_205483.5434	791
0Safe_safe_DTKP_205488.5439	3078
0Safe_safe_DTKP_205490.5441	2289
0Safe_safe_DTKP_205492.5443	1246
0Safe_safe_DTKP_205504.5455	1271
0Safe_safe_DTKP_205505.5456	1648
0Safe_safe_DTKP_205509.5460	2069
0Safe_safe_DTKP_205511.5462	1166
0Safe_safe_DTKP_205513.5464	1434
0Safe_safe_DTKP_205521.5472	1267
0Safe_safe_DTKP_205529.5480	2284
0Safe_safe_DTKP_205533.5484	2032
0Safe_safe_DTKP_205538.5489	1465
0Safe_safe_DTKP_205539.5490	783
0Safe_safe_DTKP_205542.5493	2587
0Safe_safe_DTKP_205543.5494	2455
0Safe_safe_DTKP_205554.5505	3401
0Safe_safe_DTKP_205556.5507	1825
0Safe_safe_DTKP_205558.5509	2301
0Safe_safe_DTKP_205562.5513	3612
0Safe_safe_DTKP_205563.5514	1512
0Safe_safe_DTKP_205569.5520	759
0Safe_safe_DTKP_205574.5525	655
0Safe_safe_DTKP_205581.5532	760
0Safe_safe_DTKP_205584.5535	1724
0Safe_safe_DTKP_205585.5536	2247
0Safe_safe_DTKP_205591.5542	1211
0Safe_safe_DTKP_205599.5550	2089
0Safe_safe_DTKP_205613.5564	602
0Safe_safe_DTKP_205620.5571	2999
0Safe_safe_DTKP_205640.5591	1057
0Safe_safe_DTKP_205681.5632	1205
0Safe_safe_DTKP_205686.5637	2208
0Safe_safe_DTKP_205711.5662	1810
0Safe_safe_DTKP_205718.5669	3254
0Safe_safe_DTKP_205723.5674	1276
0Safe_safe_DTKP_205727.5678	1666
0Safe_safe_DTKP_205733.5684	1279
0Safe_safe_DTKP_205749.5700	2028
0Safe_safe_DTKP_205753.5704	2573
0Safe_safe_DTKP_205761.5712	1201
0Safe_safe_DTKP_205768.5719	2567
0Safe_safe_DTKP_205774.5725	1735
0Safe_safe_DTKP_205778.5729	1542
0Safe_safe_DTKP_205789.5740	2449
0Safe_safe_DTKP_205790.5741	822
0Safe_safe_DTKP_205794.5745	3395
0Safe_safe_DTKP_205803.5754	1239
0Safe_safe_DTKP_205818.5769	1497
0Safe_safe_DTKP_205820.5771	2224
0Safe_safe_DTKP_205822.5773	632
0Safe_safe_DTKP_205839.5790	3021
0Safe_safe_DTKP_205872.5823	2087
0Safe_safe_DTKP_205877.5828	1573
0Safe_safe_DTKP_205884.5835	2313
0Safe_safe_DTKP_205900.5851	1529
0Safe_safe_DTKP_205926.5877	1565
0Safe_safe_DTKP_205940.5891	1590
0Safe_safe_DTKP_205944.5895	1188
0Safe_safe_DTKP_205950.5901	3195
0Safe_safe_DTKP_205963.5914	2599
0Safe_safe_DTKP_205983.5934	2339
0Safe_safe_DTKP_205986.5937	2206
0Safe_safe_DTKP_205988.5939	2018
0Safe_safe_DTKP_205992.5943	1270
0Safe_safe_DTKP_205998.5949	994
0Safe_safe_DTKP_206016.5967	1602
0Safe_safe_DTKP_206017.5968	1104
0Safe_safe_DTKP_206021.5972	1673
0Safe_safe_DTKP_206023.5974	1864
0Safe_safe_DTKP_206030.5981	1731
0Safe_safe_DTKP_206036.5987	1617
0Safe_safe_DTKP_206045.5996	1910
0Safe_safe_DTKP_206046.5997	2853
0Safe_safe_GEEX_206053.1504	1913
0Safe_safe_GEEX_206056.1507	2611
0Safe_safe_GEEX_206061.1512	2184
0Safe_safe_GEEX_206067.1518	2433
0Safe_safe_GEEX_206081.1532	2521
0Safe_safe_GEEX_206095.1546	1817
0Safe_safe_GEEX_206113.1564	812
0Safe_safe_GEEX_206119.1570	1601
0Safe_safe_GEEX_206123.1574	1191
0Safe_safe_GEEX_206125.1576	1346
0Safe_safe_GEEX_206126.1577	2598
0Safe_safe_GEEX_206141.1592	2758
0Safe_safe_GEEX_206146.1597	2788
0Safe_safe_GEEX_206147.1598	2312
0Safe_safe_GEEX_206148.1599	1934
0Safe_safe_GEEX_206149.1600	913
0Safe_safe_GEEX_206154.1605	2071
0Safe_safe_GEEX_206155.1606	528
0Safe_safe_GEEX_206156.1607	2258
0Safe_safe_GEEX_206164.1615	2841
0Safe_safe_GEEX_206167.1618	3099
0Safe_safe_GEEX_206170.1621	2269
0Safe_safe_GEEX_206192.1643	1901
0Safe_safe_GEEX_206199.1650	1315
0Safe_safe_GEEX_206206.1657	1204
0Safe_safe_GEEX_206210.1661	2116
0Safe_safe_GEEX_206217.1668	3088
0Safe_safe_GEEX_206232.1683	1744
0Safe_safe_GEEX_206235.1686	2683
0Safe_safe_GEEX_206236.1687	1584
0Safe_safe_GEEX_206238.1689	2209
0Safe_safe_GEEX_206242.1693	701
0Safe_safe_GEEX_206243.1694	1846
0Safe_safe_GEEX_206251.1702	1542
0Safe_safe_GEEX_206253.1704	2283
0Safe_safe_GEEX_206254.1705	1537
0Safe_safe_GEEX_206258.1709	1349
0Safe_safe_GEEX_206259.1710	1508
0Safe_safe_GEEX_206268.1719	2550
0Safe_safe_GEEX_206273.1724	1852
0Safe_safe_GEEX_206276.1727	1315
0Safe_safe_GEEX_206290.1741	1386
0Safe_safe_GEEX_206293.1744	2261
0Safe_safe_GEEX_206294.1745	1554
0Safe_safe_GEEX_206301.1752	1565
0Safe_safe_GEEX_206305.1756	2217
0Safe_safe_GEEX_206311.1762	1006
0Safe_safe_GEEX_206321.1772	1431
0Safe_safe_GEEX_206325.1776	2686
0Safe_safe_GEEX_206329.1780	1475
0Safe_safe_GEEX_206335.1786	1212
0Safe_safe_GEEX_206336.1787	2692
0Safe_safe_GEEX_206338.1789	1149
0Safe_safe_GEEX_206346.1797	1340
0Safe_safe_GEEX_206352.1803	2534
0Safe_safe_GEEX_206359.1810	1449
0Safe_safe_GEEX_206374.1825	1647
0Safe_safe_GEEX_206375.1826	2816
0Safe_safe_GEEX_206383.1834	2239
0Safe_safe_GEEX_206391.1842	1370
0Safe_safe_GEEX_206394.1845	2448
0Safe_safe_GEEX_206399.1850	2736
0Safe_safe_GEEX_206400.1851	1702
0Safe_safe_GEEX_206405.1856	3044
0Safe_safe_GEEX_206411.1862	2219
0Safe_safe_GEEX_206415.1866	1548
0Safe_safe_GEEX_206417.1868	1259
0Safe_safe_GEEX_206421.1872	2100
0Safe_safe_GEEX_206440.1891	2661
0Safe_safe_GEEX_206443.1894	3754
0Safe_safe_GEEX_206445.1896	2951
0Safe_safe_GEEX_206451.1902	1956
0Safe_safe_GEEX_206463.1914	1758
0Safe_safe_GEEX_206501.1952	1938
0Safe_safe_GEEX_206502.1953	1967
0Safe_safe_GEEX_206507.1958	1855
0Safe_safe_GEEX_206510.1961	573
0Safe_safe_GEEX_206522.1973	1323
0Safe_safe_GEEX_206526.1977	1405
0Safe_safe_GEEX_206530.1981	1498
0Safe_safe_GEEX_206541.1992	1737
0Safe_safe_GEEX_206547.1998	1448
0Safe_safe_GEEX_206551.2002	3015
0Safe_safe_GEEX_206552.2003	1692
0Safe_safe_GEEX_206553.2004	2391
0Safe_safe_GEEX_206557.2008	1943
0Safe_safe_GEEX_206565.2016	959
0Safe_safe_GEEX_206580.2031	2655
0Safe_safe_GEEX_206583.2034	3100
0Safe_safe_GEEX_206585.2036	1810
0Safe_safe_GEEX_206587.2038	2230
0Safe_safe_GEEX_206588.2039	1779
0Safe_safe_GEEX_206597.2048	2478
0Safe_safe_GEEX_206613.2064	1112
0Safe_safe_GEEX_206626.2077	2864
0Safe_safe_GEEX_206642.2093	1409
0Safe_safe_GEEX_206648.2099	1864
0Safe_safe_GEEX_206649.2100	1464
0Safe_safe_GEEX_206676.2127	2247
0Safe_safe_GEEX_206685.2136	2305
0Safe_safe_GEEX_206705.2156	2044
0Safe_safe_GEEX_206720.2171	1392
0Safe_safe_GEEX_206730.2181	1230
0Safe_safe_GEEX_206731.2182	1942
0Safe_safe_GEEX_206743.2194	1272
0Safe_safe_GEEX_206747.2198	1251
0Safe_safe_GEEX_206753.2204	1252
0Safe_safe_GEEX_206760.2211	2696
0Safe_safe_GEEX_206774.2225	1430
0Safe_safe_GEEX_206778.2229	599
0Safe_safe_GEEX_206781.2232	2584
0Safe_safe_GEEX_206784.2235	1660
0Safe_safe_GEEX_206792.2243	1982
0Safe_safe_GEEX_206793.2244	1669
0Safe_safe_MEPR_206803.1003	1338
0Safe_safe_MEPR_206804.1004	1274
0Safe_safe_MEPR_206807.1007	1286
0Safe_safe_MEPR_206810.1010	1363
0Safe_safe_MEPR_206814.1014	3055
0Safe_safe_MEPR_206826.1026	2360
0Safe_safe_MEPR_206827.1027	2817
0Safe_safe_MEPR_206843.1043	1927
0Safe_safe_MEPR_206857.1057	2825
0Safe_safe_MEPR_206859.1059	2927
0Safe_safe_MEPR_206869.1069	1739
0Safe_safe_MEPR_206870.1070	1738
0Safe_safe_MEPR_206876.1076	1882
0Safe_safe_MEPR_206891.1091	1629
0Safe_safe_MEPR_206892.1092	1852
0Safe_safe_MEPR_206896.1096	988
0Safe_safe_MEPR_206901.1101	2001
0Safe_safe_MEPR_206914.1114	1340
0Safe_safe_MEPR_206916.1116	1713
0Safe_safe_MEPR_206918.1118	2080
0Safe_safe_MEPR_206921.1121	2951
0Safe_safe_MEPR_206930.1130	1351
0Safe_safe_MEPR_206935.1135	2609
0Safe_safe_MEPR_206938.1138	1716
0Safe_safe_MEPR_206951.1151	2942
0Safe_safe_MEPR_206960.1160	1940
0Safe_safe_MEPR_206961.1161	499
0Safe_safe_MEPR_206965.1165	1966
0Safe_safe_MEPR_206968.1168	662
0Safe_safe_MEPR_206970.1170	2884
0Safe_safe_MEPR_206976.1176	1928
0Safe_safe_MEPR_206979.1179	2455
0Safe_safe_MEPR_206983.1183	1818
0Safe_safe_MEPR_206989.1189	978
0Safe_safe_MEPR_207012.1212	1893
0Safe_safe_MEPR_207015.1215	2014
0Safe_safe_MEPR_207019.1219	2576
0Safe_safe_MEPR_207025.1225	1082
0Safe_safe_MEPR_207028.1228	1892
0Safe_safe_MEPR_207030.1230	280
0Safe_safe_MEPR_207031.1231	525
0Safe_safe_MEPR_207036.1236	2016
0Safe_safe_MEPR_207037.1237	1881
0Safe_safe_MEPR_207042.1242	965
0Safe_safe_MEPR_207045.1245	2306
0Safe_safe_MEPR_207057.1257	2741
0Safe_safe_MEPR_207060.1260	2001
0Safe_safe_MEPR_207070.1270	1290
0Safe_safe_MEPR_207071.1271	1734
0Safe_safe_MEPR_207073.1273	1238
0Safe_safe_MEPR_207101.1301	1021
0Safe_safe_MEPR_207106.1306	487
0Safe_safe_MEPR_207108.1308	1253
0Safe_safe_MEPR_207112.1312	1036
0Safe_safe_MEPR_207133.1333	1773
0Safe_safe_MEPR_207148.1348	2640
0Safe_safe_MEPR_207151.1351	1991
0Safe_safe_MEPR_207158.1358	1308
0Safe_safe_MEPR_207162.1362	877
0Safe_safe_MEPR_207168.1368	1897
0Safe_safe_MEPR_207169.1369	1588
0Safe_safe_MEPR_207173.1373	1140
0Safe_safe_MEPR_207175.1375	1301
0Safe_safe_MEPR_207181.1381	2155
0Safe_safe_MEPR_207196.1396	3883
0Safe_safe_MEPR_207198.1398	1882
0Safe_safe_MEPR_207203.1403	1342
0Safe_safe_MEPR_207215.1415	1372
0Safe_safe_MEPR_207254.1454	1734
0Safe_safe_MEPR_207260.1460	1851
0Safe_safe_MEPR_207271.1471	2151
0Safe_safe_MEPR_207273.1473	2186
0Safe_safe_MEPR_207276.1476	2515
0Safe_safe_MEPR_207297.1497	815
0Safe_safe_MEPR_207300.1500	2332
0Safe_safe_MEPR_207304.754	2625
0Safe_safe_MEPR_207323.773	2203
0Safe_safe_MEPR_207325.775	3155
0Safe_safe_MEPR_207329.779	2589
0Safe_safe_MEPR_207331.781	1537
0Safe_safe_MEPR_207334.784	1452
0Safe_safe_MEPR_207339.789	352
0Safe_safe_MEPR_207347.797	1896
0Safe_safe_MEPR_207348.798	2292
0Safe_safe_MEPR_207351.801	672
0Safe_safe_MEPR_207381.831	997
0Safe_safe_MEPR_207386.836	1125
0Safe_safe_MEPR_207387.837	2972
0Safe_safe_MEPR_207389.839	2715
0Safe_safe_MEPR_207392.842	2088
0Safe_safe_MEPR_207397.847	2121
0Safe_safe_MEPR_207402.852	2309
0Safe_safe_MEPR_207413.863	1683
0Safe_safe_MEPR_207414.864	1920
0Safe_safe_MEPR_207429.879	2669
0Safe_safe_MEPR_207454.904	2964
0Safe_safe_MEPR_207455.905	1286
0Safe_safe_MEPR_207456.906	1090
0Safe_safe_MEPR_207462.912	3155
0Safe_safe_MEPR_207467.917	1730
0Safe_safe_MEPR_207471.921	1782
0Safe_safe_MEPR_207478.928	2221
0Safe_safe_MEPR_207481.931	1017
0Safe_safe_MEPR_207484.934	1080
0Safe_safe_MEPR_207486.936	961
0Safe_safe_MEPR_207487.937	1555
0Safe_safe_MEPR_207488.938	1823
0Safe_safe_MEPR_207490.940	540
0Safe_safe_MEPR_207491.941	1239
0Safe_safe_MEPR_207494.944	1472
0Safe_safe_MEPR_207495.945	1008
0Safe_safe_MEPR_207497.947	1313
0Safe_safe_MEPR_207500.950	2053
0Safe_safe_MEPR_207502.952	1919
0Safe_safe_MEPR_207518.968	1343
0Safe_safe_MEPR_207534.984	3208
0Safe_safe_MEPR_207542.992	1676
0Safe_safe_MEPR_207544.994	1813
0Safe_safe_PROT_207550.2251	2737
0Safe_safe_PROT_207553.2254	2147
0Safe_safe_PROT_207554.2255	1096
0Safe_safe_PROT_207559.2260	635
0Safe_safe_PROT_207566.2267	1586
0Safe_safe_PROT_207578.2279	1570
0Safe_safe_PROT_207581.2282	1270
0Safe_safe_PROT_207597.2298	1132
0Safe_safe_PROT_207600.2301	1257
0Safe_safe_PROT_207604.2305	2487
0Safe_safe_PROT_207605.2306	2597
0Safe_safe_PROT_207610.2311	1041
0Safe_safe_PROT_207611.2312	1824
0Safe_safe_PROT_207617.2318	1577
0Safe_safe_PROT_207628.2329	1379
0Safe_safe_PROT_207631.2332	2000
0Safe_safe_PROT_207634.2335	1070
0Safe_safe_PROT_207643.2344	2439
0Safe_safe_PROT_207645.2346	2122
0Safe_safe_PROT_207653.2354	2679
0Safe_safe_PROT_207662.2363	3125
0Safe_safe_PROT_207675.2376	1808
0Safe_safe_PROT_207698.2399	1724
0Safe_safe_PROT_207700.2401	3294
0Safe_safe_PROT_207702.2403	896
0Safe_safe_PROT_207703.2404	1774
0Safe_safe_PROT_207730.2431	1738
0Safe_safe_PROT_207734.2435	1373
0Safe_safe_PROT_207736.2437	1820
0Safe_safe_PROT_207737.2438	3323
0Safe_safe_PROT_207739.2440	1193
0Safe_safe_PROT_207741.2442	837
0Safe_safe_PROT_207786.2487	1790
0Safe_safe_PROT_207794.2495	328
0Safe_safe_PROT_207801.2502	718
0Safe_safe_PROT_207802.2503	2396
0Safe_safe_PROT_207827.2528	1773
0Safe_safe_PROT_207833.2534	1282
0Safe_safe_PROT_207836.2537	1492
0Safe_safe_PROT_207841.2542	1393
0Safe_safe_PROT_207844.2545	2264
0Safe_safe_PROT_207847.2548	2204
0Safe_safe_PROT_207854.2555	1612
0Safe_safe_PROT_207862.2563	2065
0Safe_safe_PROT_207863.2564	1362
0Safe_safe_PROT_207876.2577	844
0Safe_safe_PROT_207878.2579	2399
0Safe_safe_PROT_207887.2588	950
0Safe_safe_PROT_207896.2597	1823
0Safe_safe_PROT_207901.2602	844
0Safe_safe_PROT_207908.2609	1111
0Safe_safe_PROT_207912.2613	2182
0Safe_safe_PROT_207914.2615	2149
0Safe_safe_PROT_207916.2617	1288
0Safe_safe_PROT_207926.2627	2023
0Safe_safe_PROT_207928.2629	1136
0Safe_safe_PROT_207931.2632	1582
0Safe_safe_PROT_207932.2633	1611
0Safe_safe_PROT_207933.2634	3313
0Safe_safe_PROT_207936.2637	1356
0Safe_safe_PROT_207937.2638	1232
0Safe_safe_PROT_207949.2650	1418
0Safe_safe_PROT_207952.2653	1009
0Safe_safe_PROT_207960.2661	2126
0Safe_safe_PROT_207962.2663	1263
0Safe_safe_PROT_207973.2674	2306
0Safe_safe_PROT_207980.2681	3303
0Safe_safe_PROT_207983.2684	1579
0Safe_safe_PROT_207986.2687	2175
0Safe_safe_PROT_207990.2691	2727
0Safe_safe_PROT_207992.2693	1930
0Safe_safe_PROT_208008.2709	1557
0Safe_safe_PROT_208009.2710	1684
0Safe_safe_PROT_208013.2714	2454
0Safe_safe_PROT_208021.2722	1330
0Safe_safe_PROT_208030.2731	1321
0Safe_safe_PROT_208031.2732	1836
0Safe_safe_PROT_208032.2733	1518
0Safe_safe_PROT_208035.2736	2369
0Safe_safe_PROT_208041.2742	1194
0Safe_safe_PROT_208044.2745	1593
0Safe_safe_PROT_208046.2747	2961
0Safe_safe_PROT_208050.2751	1937
0Safe_safe_PROT_208051.2752	1730
0Safe_safe_PROT_208054.2755	1719
0Safe_safe_PROT_208062.2763	2402
0Safe_safe_PROT_208082.2783	1220
0Safe_safe_PROT_208086.2787	1797
0Safe_safe_PROT_208087.2788	3696
0Safe_safe_PROT_208095.2796	3057
0Safe_safe_PROT_208096.2797	1327
0Safe_safe_PROT_208101.2802	2305
0Safe_safe_PROT_208106.2807	1592
0Safe_safe_PROT_208111.2812	1590
0Safe_safe_PROT_208127.2828	3632
0Safe_safe_PROT_208148.2849	1845
0Safe_safe_PROT_208165.2866	2574
0Safe_safe_PROT_208166.2867	1706
0Safe_safe_PROT_208174.2875	1435
0Safe_safe_PROT_208177.2878	1939
0Safe_safe_PROT_208180.2881	2158
0Safe_safe_PROT_208181.2882	1823
0Safe_safe_PROT_208190.2891	996
0Safe_safe_PROT_208213.2914	1568
0Safe_safe_PROT_208219.2920	1823
0Safe_safe_PROT_208220.2921	1865
0Safe_safe_PROT_208222.2923	2627
0Safe_safe_PROT_208232.2933	1905
0Safe_safe_PROT_208233.2934	3683
0Safe_safe_PROT_208235.2936	1684
0Safe_safe_PROT_208237.2938	3970
0Safe_safe_PROT_208247.2948	2446
0Safe_safe_PROT_208248.2949	1403
0Safe_safe_PROT_208262.2963	1603
0Safe_safe_PROT_208263.2964	3184
0Safe_safe_PROT_208267.2968	1563
0Safe_safe_PROT_208268.2969	1824
0Safe_safe_PROT_208269.2970	1827
0Safe_safe_PROT_208276.2977	1844
0Safe_safe_PROT_208288.2989	2479
0Safe_safe_PROT_208299.3000	2963
0Safe_safe_TMMO_208300.1	1175
0Safe_safe_TMMO_208309.107	2172
0Safe_safe_TMMO_208317.114	3326
0Safe_safe_TMMO_208324.120	2130
0Safe_safe_TMMO_208335.130	1992
0Safe_safe_TMMO_208340.135	1424
0Safe_safe_TMMO_208349.143	1879
0Safe_safe_TMMO_208368.160	3366
0Safe_safe_TMMO_208381.172	1354
0Safe_safe_TMMO_208382.173	1942
0Safe_safe_TMMO_208393.183	1233
0Safe_safe_TMMO_208399.189	2901
0Safe_safe_TMMO_208401.190	2200
0Safe_safe_TMMO_208403.192	1827
0Safe_safe_TMMO_208410.199	1075
0Safe_safe_TMMO_208416.203	1974
0Safe_safe_TMMO_208429.215	1093
0Safe_safe_TMMO_208438.223	1552
0Safe_safe_TMMO_208439.224	3179
0Safe_safe_TMMO_208451.235	2092
0Safe_safe_TMMO_208454.238	1555
0Safe_safe_TMMO_208475.257	2007
0Safe_safe_TMMO_208485.266	1443
0Safe_safe_TMMO_208492.272	2639
0Safe_safe_TMMO_208506.285	2583
0Safe_safe_TMMO_208531.307	1628
0Safe_safe_TMMO_208535.310	1130
0Safe_safe_TMMO_208541.316	1608
0Safe_safe_TMMO_208549.323	2738
0Safe_safe_TMMO_208574.346	1934
0Safe_safe_TMMO_208576.348	3235
0Safe_safe_TMMO_208577.349	1976
0Safe_safe_TMMO_208582.353	1918
0Safe_safe_TMMO_208583.354	2091
0Safe_safe_TMMO_208590.360	2218
0Safe_safe_TMMO_208611.38	1103
0Safe_safe_TMMO_208614.382	1143
0Safe_safe_TMMO_208616.384	1763
0Safe_safe_TMMO_208618.386	1188
0Safe_safe_TMMO_208628.395	2585
0Safe_safe_TMMO_208630.397	877
0Safe_safe_TMMO_208631.398	2867
0Safe_safe_TMMO_208634.40	1443
0Safe_safe_TMMO_208649.413	1593
0Safe_safe_TMMO_208654.418	1594
0Safe_safe_TMMO_208657.420	2024
0Safe_safe_TMMO_208677.439	1633
0Safe_safe_TMMO_208691.451	1312
0Safe_safe_TMMO_208697.457	2456
0Safe_safe_TMMO_208704.463	1997
0Safe_safe_TMMO_208707.466	133
0Safe_safe_TMMO_208710.469	1691
0Safe_safe_TMMO_208724.481	1239
0Safe_safe_TMMO_208726.483	1991
0Safe_safe_TMMO_208727.484	1587
0Safe_safe_TMMO_208730.487	1785
0Safe_safe_TMMO_208735.491	2288
0Safe_safe_TMMO_208737.493	2974
0Safe_safe_TMMO_208739.495	794
0Safe_safe_TMMO_208756.51	2211
0Safe_safe_TMMO_208773.525	2643
0Safe_safe_TMMO_208778.53	2786
0Safe_safe_TMMO_208786.537	1501
0Safe_safe_TMMO_208793.543	1868
0Safe_safe_TMMO_208794.544	1273
0Safe_safe_TMMO_208799.549	1726
0Safe_safe_TMMO_208802.551	1401
0Safe_safe_TMMO_208805.554	2706
0Safe_safe_TMMO_208812.560	1681
0Safe_safe_TMMO_208831.578	1545
0Safe_safe_TMMO_208832.579	2262
0Safe_safe_TMMO_208854.599	1686
0Safe_safe_TMMO_208867.61	2676
0Safe_safe_TMMO_208868.610	2101
0Safe_safe_TMMO_208882.623	1695
0Safe_safe_TMMO_208886.627	1919
0Safe_safe_TMMO_208911.65	2168
0Safe_safe_TMMO_208913.651	2349
0Safe_safe_TMMO_208917.655	2668
0Safe_safe_TMMO_208918.656	2646
0Safe_safe_TMMO_208919.657	681
0Safe_safe_TMMO_208926.663	3662
0Safe_safe_TMMO_208939.675	3054
0Safe_safe_TMMO_208947.682	1725
0Safe_safe_TMMO_208958.692	1995
0Safe_safe_TMMO_208962.696	1453
0Safe_safe_TMMO_208963.697	1037
0Safe_safe_TMMO_208980.711	1824
0Safe_safe_TMMO_208983.714	1595
0Safe_safe_TMMO_208990.720	2389
0Safe_safe_TMMO_208993.723	2036
0Safe_safe_TMMO_208997.727	1401
0Safe_safe_TMMO_209005.734	970
0Safe_safe_TMMO_209012.740	1552
0Safe_safe_TMMO_209013.741	1717
0Safe_safe_TMMO_209016.744	1599
0Safe_safe_TMMO_209019.747	1842
0Safe_safe_TMMO_209022.75	1600
0Safe_safe_TMMO_209024.76	2305
0Safe_safe_TMMO_209025.77	2059
0Safe_safe_TMMO_209031.82	2157
0Safe_safe_TMMO_209036.87	738
0Safe_safe_TMMO_209039.9	706
0Safe_safe_TMMO_209043.93	1573
0Safe_safe_UNA1_209066.3767	2336
0Safe_safe_UNA1_209072.3773	1893
0Safe_safe_UNA1_209089.3790	1931
0Safe_safe_UNA1_209095.3796	2043
0Safe_safe_UNA1_209107.3808	2410
0Safe_safe_UNA1_209114.3815	2004
0Safe_safe_UNA1_209119.3820	1906
0Safe_safe_UNA1_209126.3827	1365
0Safe_safe_UNA1_209127.3828	1585
0Safe_safe_UNA1_209137.3838	1701
0Safe_safe_UNA1_209150.3851	2675
0Safe_safe_UNA1_209153.3854	2759
0Safe_safe_UNA1_209162.3863	2277
0Safe_safe_UNA1_209166.3867	2757
0Safe_safe_UNA1_209181.3882	2173
0Safe_safe_UNA1_209182.3883	1330
0Safe_safe_UNA1_209187.3888	1446
0Safe_safe_UNA1_209191.3892	1828
0Safe_safe_UNA1_209192.3893	1242
0Safe_safe_UNA1_209194.3895	2012
0Safe_safe_UNA1_209198.3899	1338
0Safe_safe_UNA1_209205.3906	2793
0Safe_safe_UNA1_209206.3907	1187
0Safe_safe_UNA1_209208.3909	2329
0Safe_safe_UNA1_209212.3913	2307
0Safe_safe_UNA1_209217.3918	113
0Safe_safe_UNA1_209218.3919	1554
0Safe_safe_UNA1_209236.3937	3318
0Safe_safe_UNA1_209245.3946	1825
0Safe_safe_UNA1_209266.3967	2407
0Safe_safe_UNA1_209280.3981	1054
0Safe_safe_UNA1_209283.3984	1472
0Safe_safe_UNA1_209289.3990	1660
0Safe_safe_UNA1_209292.3993	1280
0Safe_safe_UNA1_209294.3995	2695
0Safe_safe_UNA1_209313.4014	1676
0Safe_safe_UNA1_209320.4021	2406
0Safe_safe_UNA1_209331.4032	2288
0Safe_safe_UNA1_209340.4041	1419
0Safe_safe_UNA1_209344.4045	2231
0Safe_safe_UNA1_209349.4050	1773
0Safe_safe_UNA1_209352.4053	2223
0Safe_safe_UNA1_209353.4054	1767
0Safe_safe_UNA1_209355.4056	474
0Safe_safe_UNA1_209358.4059	1483
0Safe_safe_UNA1_209365.4066	1239
0Safe_safe_UNA1_209366.4067	1372
0Safe_safe_UNA1_209372.4073	1028
0Safe_safe_UNA1_209373.4074	2013
0Safe_safe_UNA1_209380.4081	3262
0Safe_safe_UNA1_209387.4088	1551
0Safe_safe_UNA1_209411.4112	1840
0Safe_safe_UNA1_209413.4114	2536
0Safe_safe_UNA1_209424.4125	2637
0Safe_safe_UNA1_209433.4134	1186
0Safe_safe_UNA1_209436.4137	1613
0Safe_safe_UNA1_209441.4142	2182
0Safe_safe_UNA1_209445.4146	1398
0Safe_safe_UNA1_209446.4147	1946
0Safe_safe_UNA1_209464.4165	552
0Safe_safe_UNA1_209467.4168	1827
0Safe_safe_UNA1_209471.4172	621
0Safe_safe_UNA1_209473.4174	1045
0Safe_safe_UNA1_209474.4175	1658
0Safe_safe_UNA1_209477.4178	1962
0Safe_safe_UNA1_209479.4180	1196
0Safe_safe_UNA1_209485.4186	1743
0Safe_safe_UNA1_209487.4188	1466
0Safe_safe_UNA1_209508.4209	2591
0Safe_safe_UNA1_209510.4211	1530
0Safe_safe_UNA1_209513.4214	1474
0Safe_safe_UNA1_209517.4218	2433
0Safe_safe_UNA1_209523.4224	1378
0Safe_safe_UNA1_209524.4225	1543
0Safe_safe_UNA1_209525.4226	2283
0Safe_safe_UNA1_209533.4234	2197
0Safe_safe_UNA1_209546.4247	2344
0Safe_safe_UNA1_209548.4249	1418
0Safe_safe_UNA1_209564.4265	2582
0Safe_safe_UNA1_209580.4281	2249
0Safe_safe_UNA1_209583.4284	2159
0Safe_safe_UNA1_209591.4292	1032
0Safe_safe_UNA1_209595.4296	1035
0Safe_safe_UNA1_209603.4304	1154
0Safe_safe_UNA1_209608.4309	1608
0Safe_safe_UNA1_209612.4313	2094
0Safe_safe_UNA1_209627.4328	2132
0Safe_safe_UNA1_209631.4332	1452
0Safe_safe_UNA1_209633.4334	1268
0Safe_safe_UNA1_209639.4340	2820
0Safe_safe_UNA1_209642.4343	1965
0Safe_safe_UNA1_209645.4346	1678
0Safe_safe_UNA1_209646.4347	1512
0Safe_safe_UNA1_209661.4362	786
0Safe_safe_UNA1_209678.4379	2284
0Safe_safe_UNA1_209684.4385	1600
0Safe_safe_UNA1_209685.4386	2281
0Safe_safe_UNA1_209692.4393	1421
0Safe_safe_UNA1_209693.4394	2572
0Safe_safe_UNA1_209702.4403	1793
0Safe_safe_UNA1_209707.4408	2681
0Safe_safe_UNA1_209708.4409	2660
0Safe_safe_UNA1_209714.4415	1466
0Safe_safe_UNA1_209718.4419	1798
0Safe_safe_UNA1_209726.4427	880
0Safe_safe_UNA1_209732.4433	1121
0Safe_safe_UNA1_209735.4436	2703
0Safe_safe_UNA1_209738.4439	1417
0Safe_safe_UNA1_209753.4454	1594
0Safe_safe_UNA1_209776.4477	1285
0Safe_safe_UNA1_209779.4480	2123
0Safe_safe_UNA1_209781.4482	1119
0Safe_safe_UNA2_209806.3007	2855
0Safe_safe_UNA2_209807.3008	2385
0Safe_safe_UNA2_209811.3012	41
0Safe_safe_UNA2_209817.3018	1873
0Safe_safe_UNA2_209819.3020	2732
0Safe_safe_UNA2_209840.3041	2040
0Safe_safe_UNA2_209851.3052	1010
0Safe_safe_UNA2_209866.3067	1272
0Safe_safe_UNA2_209870.3071	1172
0Safe_safe_UNA2_209872.3073	2574
0Safe_safe_UNA2_209888.3089	1692
0Safe_safe_UNA2_209890.3091	476
0Safe_safe_UNA2_209891.3092	1844
0Safe_safe_UNA2_209896.3097	2119
0Safe_safe_UNA2_209912.3113	2449
0Safe_safe_UNA2_209918.3119	1357
0Safe_safe_UNA2_209924.3125	2755
0Safe_safe_UNA2_209925.3126	1857
0Safe_safe_UNA2_209936.3137	2917
0Safe_safe_UNA2_209941.3142	2801
0Safe_safe_UNA2_209947.3148	2022
0Safe_safe_UNA2_209950.3151	1571
0Safe_safe_UNA2_209958.3159	1981
0Safe_safe_UNA2_209977.3178	2601
0Safe_safe_UNA2_209981.3182	2629
0Safe_safe_UNA2_210003.3204	2439
0Safe_safe_UNA2_210034.3235	1476
0Safe_safe_UNA2_210050.3251	1052
0Safe_safe_UNA2_210057.3258	1350
0Safe_safe_UNA2_210059.3260	1476
0Safe_safe_UNA2_210077.3278	702
0Safe_safe_UNA2_210081.3282	1872
0Safe_safe_UNA2_210083.3284	2994
0Safe_safe_UNA2_210085.3286	2740
0Safe_safe_UNA2_210091.3292	1612
0Safe_safe_UNA2_210094.3295	1431
0Safe_safe_UNA2_210096.3297	1050
0Safe_safe_UNA2_210101.3302	1291
0Safe_safe_UNA2_210120.3321	1264
0Safe_safe_UNA2_210135.3336	1411
0Safe_safe_UNA2_210139.3340	1640
0Safe_safe_UNA2_210153.3354	2167
0Safe_safe_UNA2_210155.3356	2529
0Safe_safe_UNA2_210156.3357	1877
0Safe_safe_UNA2_210166.3367	967
0Safe_safe_UNA2_210168.3369	1521
0Safe_safe_UNA2_210183.3384	1010
0Safe_safe_UNA2_210185.3386	2192
0Safe_safe_UNA2_210192.3393	1892
0Safe_safe_UNA2_210193.3394	1447
0Safe_safe_UNA2_210200.3401	1611
0Safe_safe_UNA2_210202.3403	2198
0Safe_safe_UNA2_210204.3405	1910
0Safe_safe_UNA2_210206.3407	1971
0Safe_safe_UNA2_210221.3422	1237
0Safe_safe_UNA2_210223.3424	1643
0Safe_safe_UNA2_210226.3427	741
0Safe_safe_UNA2_210227.3428	2148
0Safe_safe_UNA2_210236.3437	1643
0Safe_safe_UNA2_210241.3442	1653
0Safe_safe_UNA2_210247.3448	2141
0Safe_safe_UNA2_210258.3459	1612
0Safe_safe_UNA2_210265.3466	1096
0Safe_safe_UNA2_210283.3484	1016
0Safe_safe_UNA2_210288.3489	2170
0Safe_safe_UNA2_210292.3493	2566
0Safe_safe_UNA2_210294.3495	1467
0Safe_safe_UNA2_210298.3499	889
0Safe_safe_UNA2_210299.3500	1958
0Safe_safe_UNA2_210312.3513	566
0Safe_safe_UNA2_210313.3514	1960
0Safe_safe_UNA2_210321.3522	1532
0Safe_safe_UNA2_210327.3528	1492
0Safe_safe_UNA2_210337.3538	1952
0Safe_safe_UNA2_210341.3542	1223
0Safe_safe_UNA2_210351.3552	3009
0Safe_safe_UNA2_210357.3558	1461
0Safe_safe_UNA2_210358.3559	2008
0Safe_safe_UNA2_210363.3564	1486
0Safe_safe_UNA2_210373.3574	2021
0Safe_safe_UNA2_210378.3579	1636
0Safe_safe_UNA2_210388.3589	1014
0Safe_safe_UNA2_210402.3603	2607
0Safe_safe_UNA2_210419.3620	2346
0Safe_safe_UNA2_210420.3621	1433
0Safe_safe_UNA2_210434.3635	1082
0Safe_safe_UNA2_210459.3660	1542
0Safe_safe_UNA2_210478.3679	1546
0Safe_safe_UNA2_210480.3681	677
0Safe_safe_UNA2_210483.3684	2696
0Safe_safe_UNA2_210487.3688	1935
0Safe_safe_UNA2_210489.3690	2160
0Safe_safe_UNA2_210490.3691	1690
0Safe_safe_UNA2_210500.3701	2696
0Safe_safe_UNA2_210512.3713	2583
0Safe_safe_UNA2_210521.3722	1695
0Safe_safe_UNA2_210527.3728	1721
0Safe_safe_UNA2_210538.3739	1801
0Safe_safe_UNA2_210547.3748	1541
0Safe_safe_UNA3_210560.6011	937
0Safe_safe_UNA3_210582.6033	1708
0Safe_safe_UNA3_210586.6037	1052
0Safe_safe_UNA3_210593.6044	1629
0Safe_safe_UNA3_210599.6050	2094
0Safe_safe_UNA3_210601.6052	1918
0Safe_safe_UNA3_210606.6057	1450
0Safe_safe_UNA3_210607.6058	1920
0Safe_safe_UNA3_210612.6063	3044
0Safe_safe_UNA3_210622.6073	1980
0Safe_safe_UNA3_210628.6079	947
0Safe_safe_UNA3_210633.6084	2122
0Safe_safe_UNA3_210634.6085	1542
0Safe_safe_UNA3_210643.6094	839
0Safe_safe_UNA3_210644.6095	363
0Safe_safe_UNA3_210648.6099	1317
0Safe_safe_UNA3_210676.6127	1784
0Safe_safe_UNA3_210679.6130	2212
0Safe_safe_UNA3_210709.6160	2125
0Safe_safe_UNA3_210711.6162	1835
0Safe_safe_UNA3_210714.6165	1981
0Safe_safe_UNA3_210717.6168	1310
0Safe_safe_UNA3_210719.6170	1589
0Safe_safe_UNA3_210721.6172	2761
0Safe_safe_UNA3_210723.6174	1927
0Safe_safe_UNA3_210725.6176	1524
0Safe_safe_UNA3_210728.6179	1819
0Safe_safe_UNA3_210733.6184	1548
0Safe_safe_UNA3_210737.6188	1465
0Safe_safe_UNA3_210738.6189	1936
0Safe_safe_UNA3_210739.6190	2844
0Safe_safe_UNA3_210753.6204	1966
0Safe_safe_UNA3_210756.6207	1833
0Safe_safe_UNA3_210758.6209	1296
0Safe_safe_UNA3_210759.6210	2688
0Safe_safe_UNA3_210760.6211	2117
0Safe_safe_UNA3_210768.6219	1534
0Safe_safe_UNA3_210772.6223	860
0Safe_safe_UNA3_210780.6231	1644
0Safe_safe_UNA3_210781.6232	1269
0Safe_safe_UNA3_210785.6236	2048
0Safe_safe_UNA3_210792.6243	1488
0Safe_safe_UNA3_210794.6245	1341
0Safe_safe_UNA3_210797.6248	2030
0Safe_safe_UNA3_210799.6250	1765
0Safe_safe_UNA3_210800.6251	1600
0Safe_safe_UNA3_210804.6255	1283
0Safe_safe_UNA3_210807.6258	1733
0Safe_safe_UNA3_210808.6259	1005
0Safe_safe_UNA3_210813.6264	1320
0Safe_safe_UNA3_210814.6265	1317
0Safe_safe_UNA3_210819.6270	1848
0Safe_safe_UNA3_210825.6276	1005
0Safe_safe_UNA3_210840.6291	636
0Safe_safe_UNA3_210845.6296	2233
0Safe_safe_UNA3_210850.6301	1553
0Safe_safe_UNA3_210861.6312	2443
0Safe_safe_UNA3_210867.6318	2132
0Safe_safe_UNA3_210880.6331	1312
0Safe_safe_UNA3_210882.6333	1529
0Safe_safe_UNA3_210889.6340	2126
0Safe_safe_UNA3_210913.6364	1677
0Safe_safe_UNA3_210915.6366	2526
0Safe_safe_UNA3_210936.6387	2048
0Safe_safe_UNA3_210939.6390	1616
0Safe_safe_UNA3_210944.6395	2268
0Safe_safe_UNA3_210947.6398	1575
0Safe_safe_UNA3_210949.6400	516
0Safe_safe_UNA3_210951.6402	2237
0Safe_safe_UNA3_210963.6414	1251
0Safe_safe_UNA3_210969.6420	1500
0Safe_safe_UNA3_210978.6429	1737
0Safe_safe_UNA3_210989.6440	1171
0Safe_safe_UNA3_210995.6446	1344
0Safe_safe_UNA3_211003.6454	832
0Safe_safe_UNA3_211009.6460	932
0Safe_safe_UNA3_211011.6462	1230
0Safe_safe_UNA3_211017.6468	3733
0Safe_safe_UNA3_211022.6473	4236
0Safe_safe_UNA3_211027.6478	1308
0Safe_safe_UNA3_211034.6485	1081
0Safe_safe_UNA3_211037.6488	2682
0Safe_safe_UNA3_211051.6502	2077
0Safe_safe_UNA3_211057.6508	2962
0Safe_safe_UNA3_211063.6514	1851
0Safe_safe_UNA3_211077.6528	2437
0Safe_safe_UNA3_211078.6529	644
0Safe_safe_UNA3_211082.6533	2705
0Safe_safe_UNA3_211086.6537	2118
0Safe_safe_UNA3_211091.6542	2425
0Safe_safe_UNA3_211093.6544	2018
0Safe_safe_UNA3_211100.6551	2085
0Safe_safe_UNA3_211107.6558	1573
0Safe_safe_UNA3_211123.6574	2105
0Safe_safe_UNA3_211129.6580	1630
0Safe_safe_UNA3_211142.6593	2118
0Safe_safe_UNA3_211144.6595	1894
0Safe_safe_UNA3_211149.6600	1969
0Safe_safe_UNA3_211150.6601	2000
0Safe_safe_UNA3_211165.6616	1253
0Safe_safe_UNA3_211166.6617	2159
0Safe_safe_UNA3_211172.6623	1022
0Safe_safe_UNA3_211175.6626	2684
0Safe_safe_UNA3_211183.6634	1433
0Safe_safe_UNA3_211184.6635	2092
0Safe_safe_UNA3_211186.6637	1594
0Safe_safe_UNA3_211187.6638	970
0Safe_safe_UNA3_211188.6639	2033
0Safe_safe_UNA3_211197.6648	976
0Safe_safe_UNA3_211204.6655	1737
0Safe_safe_UNA3_211217.6668	1921
0Safe_safe_UNA3_211223.6674	1269
0Safe_safe_UNA3_211230.6681	1431
0Safe_safe_UNA3_211231.6682	1575
0Safe_safe_UNA3_211232.6683	3744
0Safe_safe_UNA3_211233.6684	2804
0Safe_safe_UNA3_211242.6693	1100
0Safe_safe_UNA3_211266.6717	1834
0Safe_safe_UNA3_211270.6721	2506
0Safe_safe_UNA3_211271.6722	1278
0Safe_safe_UNA3_211272.6723	1618
0Safe_safe_UNA3_211278.6729	2105
0Safe_safe_UNA3_211290.6741	2278
ABCB11_P1P2_crispri_491	1914
ABCB11_P1P2_crispri_492	1542
[truncated: 2,830 more rows]

## Sheet: T0
0NONE_na_crispri_205283	2082
0NONE_na_crispri_205288	878
0NONE_na_crispri_205289	1483
0NONE_na_crispri_205291	2057
0NONE_na_crispri_205292	1311
0NONE_na_crispri_205296	1433
0NONE_na_crispri_205298	1639
0NONE_na_crispri_205299	2146
0NONE_na_crispri_205300	1390
0NONE_na_crispri_205301	3158
0NONE_na_crispri_205304	1461
0NONE_na_crispri_205305	2152
0NONE_na_crispri_205308	667
0NONE_na_crispri_205313	2268
0NONE_na_crispri_205320	1313
0NONE_na_crispri_205327	1995
0NONE_na_crispri_205330	1602
0NONE_na_crispri_205334	1650
0NONE_na_crispri_205335	2085
0NONE_na_crispri_205336	2368
0NONE_na_crispri_205338	1973
0NONE_na_crispri_205340	1056
0NONE_na_crispri_205347	2414
0NONE_na_crispri_205348	1645
0NONE_na_crispri_205353	1487
0NONE_na_crispri_205363	2422
0NONE_na_crispri_205364	2205
0NONE_na_crispri_205366	2134
0NONE_na_crispri_205367	2078
0NONE_na_crispri_205369	1863
0NONE_na_crispri_205372	2527
0NONE_na_crispri_205375	1520
0NONE_na_crispri_205376	887
0NONE_na_crispri_205393	2542
0NONE_na_crispri_205395	1704
0NONE_na_crispri_205399	1892
0NONE_na_crispri_205401	1784
0NONE_na_crispri_205403	1941
0NONE_na_crispri_205408	1374
0NONE_na_crispri_205415	1817
0NONE_na_crispri_205418	1939
0NONE_na_crispri_205420	960
0NONE_na_crispri_205425	2125
0NONE_na_crispri_205427	1608
0NONE_na_crispri_205436	1798
0NONE_na_crispri_205439	1156
0NONE_na_crispri_205442	1792
0NONE_na_crispri_205446	1098
0NONE_na_crispri_205449	2271
0NONE_na_crispri_205450	832
0NONE_na_crispri_205451	2083
0NONE_na_crispri_205452	1564
0NONE_na_crispri_205458	1669
0NONE_na_crispri_205459	1853
0NONE_na_crispri_205460	2280
0NONE_na_crispri_205463	2272
0NONE_na_crispri_205469	2820
0NONE_na_crispri_205474	369
0NONE_na_crispri_205477	1964
0NONE_na_crispri_205478	1669
0NONE_na_crispri_205479	1901
0NONE_na_crispri_205481	2849
0NONE_na_crispri_205484	1920
0NONE_na_crispri_205498	2285
0NONE_na_crispri_205499	1835
0NONE_na_crispri_205512	1681
0NONE_na_crispri_205513	2529
0NONE_na_crispri_205514	1289
0NONE_na_crispri_205524	1363
0NONE_na_crispri_205526	1397
0NONE_na_crispri_205530	988
0NONE_na_crispri_205537	1175
0NONE_na_crispri_205540	1374
0NONE_na_crispri_205546	108
0NONE_na_crispri_205562	1053
0NONE_na_crispri_205563	2047
0NONE_na_crispri_205565	1590
0NONE_na_crispri_205566	1510
0NONE_na_crispri_205569	1520
0NONE_na_crispri_205576	2829
0NONE_na_crispri_205588	1628
0NONE_na_crispri_205596	2158
0NONE_na_crispri_205605	1813
0NONE_na_crispri_205606	3017
0NONE_na_crispri_205615	3066
0NONE_na_crispri_205619	2556
0NONE_na_crispri_205624	1209
0NONE_na_crispri_205635	1656
0NONE_na_crispri_205639	1566
0NONE_na_crispri_205640	1617
0NONE_na_crispri_205647	2777
0NONE_na_crispri_205648	1163
0NONE_na_crispri_205652	1392
0NONE_na_crispri_205654	1580
0NONE_na_crispri_205667	1451
0NONE_na_crispri_205669	2439
0NONE_na_crispri_205670	2113
0NONE_na_crispri_205672	949
0NONE_na_crispri_205689	2097
0NONE_na_crispri_205690	2000
0NONE_na_crispri_205691	1201
0NONE_na_crispri_205692	1346
0NONE_na_crispri_205695	3218
0NONE_na_crispri_205698	3250
0NONE_na_crispri_205702	1796
0NONE_na_crispri_205704	984
0NONE_na_crispri_205706	2920
0NONE_na_crispri_205708	2630
0NONE_na_crispri_205709	1557
0NONE_na_crispri_205717	2217
0NONE_na_crispri_205718	2203
0NONE_na_crispri_205723	1786
0NONE_na_crispri_205734	1010
0NONE_na_crispri_205736	1562
0NONE_na_crispri_205739	1166
0NONE_na_crispri_205743	1349
0NONE_na_crispri_205746	2763
0NONE_na_crispri_205749	2857
0NONE_na_crispri_205750	1920
0NONE_na_crispri_205751	1441
0NONE_na_crispri_205759	869
0NONE_na_crispri_205764	1310
0NONE_na_crispri_205765	1504
0NONE_na_crispri_205769	1818
0NONE_na_crispri_205778	2019
0NONE_na_crispri_205783	1545
0NONE_na_crispri_205784	1501
0NONE_na_crispri_205786	1185
0NONE_na_crispri_205787	1932
0NONE_na_crispri_205789	1382
0NONE_na_crispri_205790	3238
0NONE_na_crispri_205806	1606
0NONE_na_crispri_205807	2233
0NONE_na_crispri_205812	3618
0NONE_na_crispri_205813	1525
0NONE_na_crispri_205814	1049
0NONE_na_crispri_205823	3128
0NONE_na_crispri_205825	2169
0NONE_na_crispri_205827	1382
0NONE_na_crispri_205828	1418
0NONE_na_crispri_205829	2641
0NONE_na_crispri_205830	883
0NONE_na_crispri_205833	2052
0NONE_na_crispri_205840	1216
0NONE_na_crispri_205842	1916
0NONE_na_crispri_205845	1899
0NONE_na_crispri_205855	1866
0NONE_na_crispri_205856	1666
0NONE_na_crispri_205865	1503
0NONE_na_crispri_205866	1803
0NONE_na_crispri_205868	2211
0NONE_na_crispri_205874	1352
0NONE_na_crispri_205875	2579
0NONE_na_crispri_205881	1783
0NONE_na_crispri_205894	2368
0NONE_na_crispri_205897	2239
0NONE_na_crispri_205901	2327
0NONE_na_crispri_205903	2851
0NONE_na_crispri_205906	1498
0NONE_na_crispri_205907	2723
0NONE_na_crispri_205908	1876
0NONE_na_crispri_205909	988
0NONE_na_crispri_205911	1105
0NONE_na_crispri_205917	2526
0NONE_na_crispri_205927	2432
0NONE_na_crispri_205933	1543
0NONE_na_crispri_205934	2441
0NONE_na_crispri_205937	1829
0NONE_na_crispri_205947	1438
0NONE_na_crispri_205949	1422
0NONE_na_crispri_205951	1599
0NONE_na_crispri_205955	1871
0NONE_na_crispri_205956	2950
0NONE_na_crispri_205959	1636
0NONE_na_crispri_205961	1354
0NONE_na_crispri_205966	2726
0NONE_na_crispri_205973	681
0NONE_na_crispri_205975	1164
0NONE_na_crispri_205981	2727
0NONE_na_crispri_205984	1823
0NONE_na_crispri_205985	2193
0NONE_na_crispri_205989	1706
0NONE_na_crispri_205990	1965
0NONE_na_crispri_205992	1924
0NONE_na_crispri_205993	1682
0NONE_na_crispri_205994	2581
0NONE_na_crispri_206004	2065
0NONE_na_crispri_206010	1324
0NONE_na_crispri_206014	1638
0NONE_na_crispri_206022	2229
0NONE_na_crispri_206024	1723
0NONE_na_crispri_206027	2038
0NONE_na_crispri_206030	1495
0NONE_na_crispri_206032	1493
0NONE_na_crispri_206037	1964
0NONE_na_crispri_206039	2642
0NONE_na_crispri_206040	2329
0NONE_na_crispri_206047	1255
0NONE_na_crispri_206051	2091
0NONE_na_crispri_206054	1021
0NONE_na_crispri_206056	1098
0NONE_na_crispri_206062	1459
0NONE_na_crispri_206066	1400
0NONE_na_crispri_206077	1721
0NONE_na_crispri_206079	1030
0NONE_na_crispri_206086	1354
0NONE_na_crispri_206092	1266
0NONE_na_crispri_206100	1673
0NONE_na_crispri_206101	2578
0NONE_na_crispri_206104	1729
0NONE_na_crispri_206106	1287
0NONE_na_crispri_206107	1532
0NONE_na_crispri_206110	2342
0NONE_na_crispri_206113	1748
0NONE_na_crispri_206114	1172
0NONE_na_crispri_206117	1637
0NONE_na_crispri_206119	1239
0NONE_na_crispri_206123	611
0NONE_na_crispri_206124	2043
0NONE_na_crispri_206128	1237
0NONE_na_crispri_206137	1431
0NONE_na_crispri_206139	3351
0NONE_na_crispri_206148	1929
0NONE_na_crispri_206149	927
0NONE_na_crispri_206158	1889
0NONE_na_crispri_206166	2150
0NONE_na_crispri_206167	2290
0NONE_na_crispri_206170	1271
0NONE_na_crispri_206173	2158
0NONE_na_crispri_206175	2387
0NONE_na_crispri_206177	1588
0NONE_na_crispri_206180	1573
0NONE_na_crispri_206188	3110
0NONE_na_crispri_206189	1094
0NONE_na_crispri_206190	2386
0NONE_na_crispri_206191	3013
0NONE_na_crispri_206193	3260
0NONE_na_crispri_206199	1381
0NONE_na_crispri_206212	1857
0NONE_na_crispri_206218	1543
0NONE_na_crispri_206219	1137
0NONE_na_crispri_206220	2689
0NONE_na_crispri_206231	1495
0NONE_na_crispri_206233	2328
0NONE_na_crispri_206244	1077
0NONE_na_crispri_206245	2423
0NONE_na_crispri_206246	1516
0NONE_na_crispri_206251	1606
0NONE_na_crispri_206252	2702
0NONE_na_crispri_206253	1817
0NONE_na_crispri_206259	1652
0NONE_na_crispri_206262	2067
0NONE_na_crispri_206263	2645
0NONE_na_crispri_206264	2362
0NONE_na_crispri_206274	1901
0NONE_na_crispri_206276	1347
0NONE_na_crispri_206281	1884
0NONE_na_crispri_206284	2697
0NONE_na_crispri_206285	1738
0NONE_na_crispri_206291	1466
0NONE_na_crispri_206292	2755
0NONE_na_crispri_206293	2039
0NONE_na_crispri_206294	1814
0NONE_na_crispri_206296	2912
0NONE_na_crispri_206298	2162
0NONE_na_crispri_206307	1868
0NONE_na_crispri_206310	2113
0NONE_na_crispri_206312	1406
0NONE_na_crispri_206317	1817
0NONE_na_crispri_206319	2698
0NONE_na_crispri_206321	2723
0NONE_na_crispri_206324	2048
0NONE_na_crispri_206331	1841
0NONE_na_crispri_206332	1475
0NONE_na_crispri_206335	1908
0NONE_na_crispri_206336	1106
0NONE_na_crispri_206338	2889
0NONE_na_crispri_206345	1505
0NONE_na_crispri_206346	1506
0NONE_na_crispri_206347	1614
0NONE_na_crispri_206351	1901
0NONE_na_crispri_206353	1715
0NONE_na_crispri_206355	2721
0NONE_na_crispri_206358	2181
0NONE_na_crispri_206361	2879
0NONE_na_crispri_206364	2180
0NONE_na_crispri_206369	1344
0NONE_na_crispri_206370	2561
0NONE_na_crispri_206371	1445
0NONE_na_crispri_206373	2564
0NONE_na_crispri_206374	2083
0NONE_na_crispri_206378	1021
0NONE_na_crispri_206379	2115
0NONE_na_crispri_206383	2766
0NONE_na_crispri_206388	2496
0NONE_na_crispri_206390	3162
0NONE_na_crispri_206392	1681
0NONE_na_crispri_206397	604
0NONE_na_crispri_206398	2814
0NONE_na_crispri_206412	1868
0NONE_na_crispri_206417	2161
0NONE_na_crispri_206425	1874
0NONE_na_crispri_206436	2045
0NONE_na_crispri_206438	1613
0NONE_na_crispri_206439	2302
0NONE_na_crispri_206443	1851
0NONE_na_crispri_206444	1546
0NONE_na_crispri_206449	2232
0NONE_na_crispri_206453	1678
0NONE_na_crispri_206454	3024
0NONE_na_crispri_206457	1887
0NONE_na_crispri_206459	1623
0NONE_na_crispri_206460	2370
0NONE_na_crispri_206462	1392
0NONE_na_crispri_206463	1050
0NONE_na_crispri_206465	1947
0NONE_na_crispri_206466	2564
0NONE_na_crispri_206475	2965
0NONE_na_crispri_206480	1742
0NONE_na_crispri_206481	2203
0NONE_na_crispri_206484	1283
0NONE_na_crispri_206485	2402
0NONE_na_crispri_206486	2702
0NONE_na_crispri_206493	2201
0NONE_na_crispri_206496	1685
0NONE_na_crispri_206500	1659
0NONE_na_crispri_206505	1454
0NONE_na_crispri_206506	593
0NONE_na_crispri_206507	2196
0NONE_na_crispri_206514	1637
0NONE_na_crispri_206517	2241
0NONE_na_crispri_206520	681
0NONE_na_crispri_206524	1695
0NONE_na_crispri_206530	1601
0NONE_na_crispri_206534	2238
0NONE_na_crispri_206537	2061
0NONE_na_crispri_206542	1798
0NONE_na_crispri_206549	1902
0NONE_na_crispri_206555	1545
0NONE_na_crispri_206556	2469
0NONE_na_crispri_206558	1746
0NONE_na_crispri_206560	1510
0NONE_na_crispri_206562	3817
0NONE_na_crispri_206567	1785
0NONE_na_crispri_206573	1951
0NONE_na_crispri_206575	1771
0NONE_na_crispri_206579	2701
0NONE_na_crispri_206583	1243
0NONE_na_crispri_206584	2172
0NONE_na_crispri_206585	3673
0NONE_na_crispri_206592	2059
0NONE_na_crispri_206597	2185
0NONE_na_crispri_206598	2359
0NONE_na_crispri_206607	2972
0NONE_na_crispri_206611	954
0NONE_na_crispri_206613	1537
0NONE_na_crispri_206622	1507
0NONE_na_crispri_206625	1686
0NONE_na_crispri_206633	1224
0NONE_na_crispri_206634	2716
0NONE_na_crispri_206639	2951
0NONE_na_crispri_206642	1205
0NONE_na_crispri_206647	1631
0NONE_na_crispri_206652	1664
0NONE_na_crispri_206657	1613
0NONE_na_crispri_206659	988
0NONE_na_crispri_206667	1986
0NONE_na_crispri_206670	2443
0NONE_na_crispri_206675	1479
0NONE_na_crispri_206681	1964
0NONE_na_crispri_206683	1786
0NONE_na_crispri_206694	1107
0NONE_na_crispri_206695	2424
0NONE_na_crispri_206697	1597
0NONE_na_crispri_206699	893
0NONE_na_crispri_206701	1799
0NONE_na_crispri_206702	1650
0NONE_na_crispri_206704	1566
0NONE_na_crispri_206709	1956
0NONE_na_crispri_206710	756
0NONE_na_crispri_206723	1476
0NONE_na_crispri_206728	1425
0NONE_na_crispri_206729	2059
0NONE_na_crispri_206730	1453
0NONE_na_crispri_206741	2272
0NONE_na_crispri_206754	1769
0NONE_na_crispri_206756	475
0NONE_na_crispri_206757	1171
0NONE_na_crispri_206760	2102
0NONE_na_crispri_206764	1411
0NONE_na_crispri_206765	2546
0NONE_na_crispri_206766	1882
0NONE_na_crispri_206767	1936
0NONE_na_crispri_206773	1591
0NONE_na_crispri_206774	1927
0NONE_na_crispri_206777	1993
0NONE_na_crispri_206778	1455
0NONE_na_crispri_206781	1581
0NONE_na_crispri_206782	1458
0NONE_na_crispri_206784	1071
0NONE_na_crispri_206787	598
0NONE_na_crispri_206806	1828
0NONE_na_crispri_206809	2722
0NONE_na_crispri_206812	1593
0NONE_na_crispri_206815	1551
0NONE_na_crispri_206821	2408
0NONE_na_crispri_206822	2552
0NONE_na_crispri_206823	1953
0NONE_na_crispri_206824	3175
0NONE_na_crispri_206825	981
0NONE_na_crispri_206826	616
0NONE_na_crispri_206829	1941
0NONE_na_crispri_206831	1546
0NONE_na_crispri_206834	1812
0NONE_na_crispri_206840	1922
0NONE_na_crispri_206844	2575
0NONE_na_crispri_206848	1698
0NONE_na_crispri_206852	1289
0NONE_na_crispri_206854	2967
0NONE_na_crispri_206856	2050
0NONE_na_crispri_206860	1873
0NONE_na_crispri_206861	2980
0NONE_na_crispri_206862	1852
0NONE_na_crispri_206865	2302
0NONE_na_crispri_206866	1871
0NONE_na_crispri_206869	1689
0NONE_na_crispri_206872	3084
0NONE_na_crispri_206878	925
0NONE_na_crispri_206879	1837
0NONE_na_crispri_206882	3709
0NONE_na_crispri_206885	1940
0NONE_na_crispri_206897	2293
0NONE_na_crispri_206903	2163
0NONE_na_crispri_206904	1488
0NONE_na_crispri_206906	1894
0NONE_na_crispri_206909	1475
0NONE_na_crispri_206910	2597
0NONE_na_crispri_206914	2365
0NONE_na_crispri_206917	787
0NONE_na_crispri_206919	1470
0NONE_na_crispri_206920	2280
0NONE_na_crispri_206923	1581
0NONE_na_crispri_206926	1334
0NONE_na_crispri_206929	1018
0NONE_na_crispri_206933	1666
0NONE_na_crispri_206935	1173
0NONE_na_crispri_206936	2097
0NONE_na_crispri_206938	1583
0NONE_na_crispri_206945	2070
0NONE_na_crispri_206946	2699
0NONE_na_crispri_206947	1674
0NONE_na_crispri_206949	2938
0NONE_na_crispri_206954	3150
0NONE_na_crispri_206956	1432
0NONE_na_crispri_206958	1923
0NONE_na_crispri_206962	2163
0NONE_na_crispri_206963	1536
0NONE_na_crispri_206965	1733
0NONE_na_crispri_206972	2114
0NONE_na_crispri_206976	1535
0NONE_na_crispri_206985	2099
0NONE_na_crispri_206991	1127
0NONE_na_crispri_206992	3535
0NONE_na_crispri_206993	1659
0NONE_na_crispri_207005	1220
0NONE_na_crispri_207007	1376
0NONE_na_crispri_207008	2083
0NONE_na_crispri_207016	3571
0NONE_na_crispri_207019	1571
0NONE_na_crispri_207021	2268
0NONE_na_crispri_207022	1611
0NONE_na_crispri_207029	856
0NONE_na_crispri_207043	1527
0NONE_na_crispri_207044	3327
0NONE_na_crispri_207053	1812
0NONE_na_crispri_207059	1490
0NONE_na_crispri_207063	1902
0NONE_na_crispri_207069	2404
0NONE_na_crispri_207070	1592
0NONE_na_crispri_207074	2370
0NONE_na_crispri_207080	1394
0NONE_na_crispri_207084	1625
0NONE_na_crispri_207090	1741
0NONE_na_crispri_207103	2116
0NONE_na_crispri_207108	1868
0NONE_na_crispri_207110	1869
0NONE_na_crispri_207118	1681
0NONE_na_crispri_207119	2591
0NONE_na_crispri_207126	1475
0NONE_na_crispri_207128	1775
0NONE_na_crispri_207131	1409
0NONE_na_crispri_207132	1570
0NONE_na_crispri_207140	2040
0NONE_na_crispri_207141	1769
0NONE_na_crispri_207144	1874
0NONE_na_crispri_207147	1789
0NONE_na_crispri_207149	1599
0NONE_na_crispri_207154	877
0NONE_na_crispri_207158	2273
0NONE_na_crispri_207160	1338
0NONE_na_crispri_207162	2104
0NONE_na_crispri_207163	1343
0NONE_na_crispri_207173	1872
0NONE_na_crispri_207183	2055
0NONE_na_crispri_207185	2179
0NONE_na_crispri_207186	1576
0NONE_na_crispri_207187	1364
0NONE_na_crispri_207192	2640
0NONE_na_crispri_207196	1537
0NONE_na_crispri_207200	1361
0NONE_na_crispri_207203	1733
0NONE_na_crispri_207204	897
0NONE_na_crispri_207206	2652
0NONE_na_crispri_207208	1657
0NONE_na_crispri_207211	2765
0NONE_na_crispri_207212	1334
0NONE_na_crispri_207213	1263
0NONE_na_crispri_207214	1426
0NONE_na_crispri_207215	1055
0NONE_na_crispri_207216	1718
0NONE_na_crispri_207218	1299
0NONE_na_crispri_207219	2841
0NONE_na_crispri_207222	1090
0NONE_na_crispri_207224	1827
0NONE_na_crispri_207225	1982
0NONE_na_crispri_207226	1304
0NONE_na_crispri_207228	485
0NONE_na_crispri_207230	2003
0NONE_na_crispri_207239	2115
0NONE_na_crispri_207245	2163
0NONE_na_crispri_207257	1715
0NONE_na_crispri_207271	1447
0NONE_na_crispri_207272	1875
0NONE_na_crispri_207273	2355
0NONE_na_crispri_207274	778
0NONE_na_crispri_207282	2152
0NONE_na_crispri_207289	1417
0NONE_na_crispri_207297	2718
0NONE_na_crispri_207300	2012
0NONE_na_crispri_207302	1197
0NONE_na_crispri_207305	1782
0NONE_na_crispri_207318	2403
0NONE_na_crispri_207319	747
0NONE_na_crispri_207330	1038
0NONE_na_crispri_207334	2483
0NONE_na_crispri_207338	1102
0NONE_na_crispri_207339	1450
0NONE_na_crispri_207348	1496
0NONE_na_crispri_207351	2174
0NONE_na_crispri_207354	1608
0NONE_na_crispri_207355	2757
0NONE_na_crispri_207356	1112
0NONE_na_crispri_207363	754
0NONE_na_crispri_207366	1582
0NONE_na_crispri_207370	1789
0NONE_na_crispri_207371	1399
0NONE_na_crispri_207372	1717
0NONE_na_crispri_207373	2257
0NONE_na_crispri_207375	1822
0NONE_na_crispri_207389	2154
0NONE_na_crispri_207390	2334
0NONE_na_crispri_207394	2445
0NONE_na_crispri_207395	3372
0NONE_na_crispri_207400	1574
0NONE_na_crispri_207406	2501
0NONE_na_crispri_207408	1671
0NONE_na_crispri_207413	2044
0NONE_na_crispri_207427	1479
0NONE_na_crispri_207428	1935
0NONE_na_crispri_207431	1625
0NONE_na_crispri_207432	1434
0NONE_na_crispri_207434	2414
0NONE_na_crispri_207435	2205
0NONE_na_crispri_207437	1777
0NONE_na_crispri_207444	1408
0NONE_na_crispri_207450	3596
0NONE_na_crispri_207452	1487
0NONE_na_crispri_207457	1811
0NONE_na_crispri_207459	2107
0NONE_na_crispri_207461	2393
0NONE_na_crispri_207462	1812
0NONE_na_crispri_207468	1552
0NONE_na_crispri_207471	1714
0NONE_na_crispri_207475	1665
0NONE_na_crispri_207479	2160
0NONE_na_crispri_207482	943
0NONE_na_crispri_207483	1786
0NONE_na_crispri_207487	2286
0NONE_na_crispri_207489	2145
0NONE_na_crispri_207493	1807
0NONE_na_crispri_207494	1874
0NONE_na_crispri_207508	1486
0NONE_na_crispri_207510	2159
0NONE_na_crispri_207511	1924
0NONE_na_crispri_207512	2390
0NONE_na_crispri_207514	2126
0NONE_na_crispri_207516	551
0NONE_na_crispri_207522	777
0NONE_na_crispri_207534	859
0NONE_na_crispri_207542	2587
0NONE_na_crispri_207553	1021
0NONE_na_crispri_207555	2438
0NONE_na_crispri_207560	2049
0NONE_na_crispri_207566	2205
0NONE_na_crispri_207570	1704
0NONE_na_crispri_207571	2116
0NONE_na_crispri_207576	2150
0NONE_na_crispri_207582	2182
0NONE_na_crispri_207589	842
0NONE_na_crispri_207590	1315
0NONE_na_crispri_207597	1842
0NONE_na_crispri_207599	1421
0NONE_na_crispri_207602	2246
0NONE_na_crispri_207608	1010
0NONE_na_crispri_207613	1690
0NONE_na_crispri_207614	2587
0NONE_na_crispri_207615	2172
0NONE_na_crispri_207617	2129
0NONE_na_crispri_207618	1060
0NONE_na_crispri_207627	2590
0NONE_na_crispri_207631	2261
0NONE_na_crispri_207632	1770
0NONE_na_crispri_207636	1840
0NONE_na_crispri_207637	1691
0NONE_na_crispri_207639	1529
0NONE_na_crispri_207640	1497
0NONE_na_crispri_207641	1884
0NONE_na_crispri_207642	2171
0NONE_na_crispri_207643	1519
0NONE_na_crispri_207644	2431
0NONE_na_crispri_207646	1281
0NONE_na_crispri_207647	4031
0NONE_na_crispri_207649	1141
0NONE_na_crispri_207655	2476
0NONE_na_crispri_207658	1705
0NONE_na_crispri_207660	1497
0NONE_na_crispri_207662	1512
0NONE_na_crispri_207669	2043
0NONE_na_crispri_207672	2402
0NONE_na_crispri_207673	2594
0NONE_na_crispri_207679	490
0NONE_na_crispri_207684	2406
0NONE_na_crispri_207694	1485
0NONE_na_crispri_207696	1691
0NONE_na_crispri_207704	2370
0NONE_na_crispri_207709	1973
0NONE_na_crispri_207710	1935
0NONE_na_crispri_207711	2475
0NONE_na_crispri_207721	1460
0NONE_na_crispri_207728	1496
0NONE_na_crispri_207740	1735
0NONE_na_crispri_207743	2123
0NONE_na_crispri_207744	594
0NONE_na_crispri_207747	2014
0NONE_na_crispri_207753	673
0NONE_na_crispri_207757	2093
0NONE_na_crispri_207771	767
0NONE_na_crispri_207774	1043
0NONE_na_crispri_207777	2044
0NONE_na_crispri_207778	1396
0NONE_na_crispri_207780	1843
0NONE_na_crispri_207786	2268
0NONE_na_crispri_207788	2805
0NONE_na_crispri_207789	1961
0NONE_na_crispri_207793	1483
0NONE_na_crispri_207800	2528
0NONE_na_crispri_207803	979
0NONE_na_crispri_207804	2401
0NONE_na_crispri_207805	1937
0NONE_na_crispri_207809	864
0NONE_na_crispri_207813	1494
0NONE_na_crispri_207814	2258
0NONE_na_crispri_207817	2370
0NONE_na_crispri_207819	1224
0NONE_na_crispri_207820	1161
0NONE_na_crispri_207821	1441
0NONE_na_crispri_207824	970
0NONE_na_crispri_207830	1985
0NONE_na_crispri_207833	2102
0NONE_na_crispri_207834	1949
0NONE_na_crispri_207837	1366
0NONE_na_crispri_207838	1421
0NONE_na_crispri_207839	1387
0NONE_na_crispri_207843	1206
0NONE_na_crispri_207844	2120
0NONE_na_crispri_207845	2052
0NONE_na_crispri_207852	1440
0NONE_na_crispri_207853	692
0NONE_na_crispri_207857	1907
0NONE_na_crispri_207859	1165
0NONE_na_crispri_207870	2390
0NONE_na_crispri_207874	1366
0NONE_na_crispri_207875	931
0NONE_na_crispri_207876	2123
0NONE_na_crispri_207878	1365
0NONE_na_crispri_207882	2472
0NONE_na_crispri_207889	2134
0NONE_na_crispri_207891	1990
0NONE_na_crispri_207893	1699
0NONE_na_crispri_207897	2133
0NONE_na_crispri_207900	2141
0NONE_na_crispri_207902	1087
0NONE_na_crispri_207909	2551
0NONE_na_crispri_207912	3373
0NONE_na_crispri_207913	1903
0NONE_na_crispri_207914	1945
0NONE_na_crispri_207915	2722
0NONE_na_crispri_207916	1672
0NONE_na_crispri_207917	1354
0NONE_na_crispri_207918	1982
0NONE_na_crispri_207928	1769
0NONE_na_crispri_207931	2802
0NONE_na_crispri_207937	2075
0NONE_na_crispri_207942	2060
0NONE_na_crispri_207944	2456
0NONE_na_crispri_207945	1910
0NONE_na_crispri_207946	1221
0NONE_na_crispri_207948	1848
0NONE_na_crispri_207952	1126
0NONE_na_crispri_207956	1381
0NONE_na_crispri_207958	1631
0NONE_na_crispri_207960	1757
0NONE_na_crispri_207961	2057
0NONE_na_crispri_207971	1704
0NONE_na_crispri_207975	1433
0NONE_na_crispri_207977	2830
0NONE_na_crispri_207978	1864
0NONE_na_crispri_207982	1216
0NONE_na_crispri_207985	2468
0NONE_na_crispri_207991	2528
0NONE_na_crispri_207995	1145
0NONE_na_crispri_208000	1604
0NONE_na_crispri_208003	3486
0NONE_na_crispri_208004	1310
0NONE_na_crispri_208011	1924
0NONE_na_crispri_208016	1131
0NONE_na_crispri_208018	1683
0NONE_na_crispri_208019	2667
0NONE_na_crispri_208020	1658
0NONE_na_crispri_208027	2126
0NONE_na_crispri_208030	1365
0NONE_na_crispri_208040	2195
0NONE_na_crispri_208042	2758
0NONE_na_crispri_208044	1892
0NONE_na_crispri_208045	1432
0NONE_na_crispri_208046	2682
0NONE_na_crispri_208047	1957
0NONE_na_crispri_208050	2552
0NONE_na_crispri_208059	1697
0NONE_na_crispri_208060	1173
0NONE_na_crispri_208063	1519
0NONE_na_crispri_208068	1212
0NONE_na_crispri_208069	1650
0NONE_na_crispri_208071	1359
0NONE_na_crispri_208072	2011
0NONE_na_crispri_208081	2545
0NONE_na_crispri_208082	1497
0NONE_na_crispri_208083	3045
0NONE_na_crispri_208085	2765
0NONE_na_crispri_208087	2405
0NONE_na_crispri_208091	2474
0NONE_na_crispri_208092	3331
0NONE_na_crispri_208093	1440
0NONE_na_crispri_208103	1765
0NONE_na_crispri_208104	4
0NONE_na_crispri_208107	1278
0NONE_na_crispri_208110	2870
0NONE_na_crispri_208118	2423
0NONE_na_crispri_208120	1412
0NONE_na_crispri_208123	1641
0NONE_na_crispri_208127	1757
0NONE_na_crispri_208131	1432
0NONE_na_crispri_208135	1582
0NONE_na_crispri_208138	1519
0NONE_na_crispri_208139	2712
0NONE_na_crispri_208140	1795
0NONE_na_crispri_208142	1681
0NONE_na_crispri_208174	1652
0NONE_na_crispri_208175	1691
0NONE_na_crispri_208177	917
0NONE_na_crispri_208180	1124
0NONE_na_crispri_208181	2026
0NONE_na_crispri_208184	1453
0NONE_na_crispri_208186	1608
0NONE_na_crispri_208191	1475
0NONE_na_crispri_208198	1437
0NONE_na_crispri_208202	1936
0NONE_na_crispri_208206	477
0NONE_na_crispri_208212	1322
0NONE_na_crispri_208219	2133
0NONE_na_crispri_208224	1792
0NONE_na_crispri_208229	3400
0NONE_na_crispri_208236	1102
0NONE_na_crispri_208237	1755
0NONE_na_crispri_208241	1788
0NONE_na_crispri_208255	2177
0NONE_na_crispri_208259	1506
0NONE_na_crispri_208261	3313
0NONE_na_crispri_208265	2030
0NONE_na_crispri_208267	2162
0NONE_na_crispri_208277	3558
0NONE_na_crispri_208278	2328
0NONE_na_crispri_208279	1279
0NONE_na_crispri_208290	2819
0NONE_na_crispri_208294	1643
0NONE_na_crispri_208296	2118
0NONE_na_crispri_208297	2252
0NONE_na_crispri_208301	1540
0NONE_na_crispri_208308	1639
0NONE_na_crispri_208310	1879
0NONE_na_crispri_208313	2496
0NONE_na_crispri_208321	2435
0NONE_na_crispri_208330	1592
0NONE_na_crispri_208331	3354
0NONE_na_crispri_208336	1617
0NONE_na_crispri_208339	1382
0NONE_na_crispri_208342	656
0NONE_na_crispri_208343	2498
0NONE_na_crispri_208345	3228
0NONE_na_crispri_208351	1696
0NONE_na_crispri_208371	1391
0NONE_na_crispri_208377	2626
0NONE_na_crispri_208381	1544
0NONE_na_crispri_208383	1010
0NONE_na_crispri_208385	3016
0NONE_na_crispri_208386	1645
0NONE_na_crispri_208396	1347
0NONE_na_crispri_208399	1447
0NONE_na_crispri_208403	1859
0NONE_na_crispri_208409	1737
0NONE_na_crispri_208417	1966
0NONE_na_crispri_208429	744
0NONE_na_crispri_208434	2558
0NONE_na_crispri_208440	3372
0NONE_na_crispri_208446	2154
0NONE_na_crispri_208449	1873
0NONE_na_crispri_208455	2773
0NONE_na_crispri_208457	1927
0NONE_na_crispri_208463	2015
0NONE_na_crispri_208464	2372
0NONE_na_crispri_208465	4345
0NONE_na_crispri_208471	2057
0NONE_na_crispri_208473	1513
0NONE_na_crispri_208476	1221
0NONE_na_crispri_208482	1867
0NONE_na_crispri_208485	2193
0NONE_na_crispri_208487	1556
0NONE_na_crispri_208488	1234
0NONE_na_crispri_208490	1652
0NONE_na_crispri_208492	1513
0NONE_na_crispri_208493	960
0NONE_na_crispri_208495	2011
0NONE_na_crispri_208500	1916
0NONE_na_crispri_208505	1625
0NONE_na_crispri_208514	1915
0NONE_na_crispri_208515	1898
0NONE_na_crispri_208518	1007
0NONE_na_crispri_208521	967
0NONE_na_crispri_208533	1936
0NONE_na_crispri_208536	1739
0NONE_na_crispri_208543	2807
0NONE_na_crispri_208546	2486
0NONE_na_crispri_208547	2138
0NONE_na_crispri_208548	1059
0NONE_na_crispri_208558	2161
0NONE_na_crispri_208559	1946
0NONE_na_crispri_208560	5507
0NONE_na_crispri_208561	2234
0NONE_na_crispri_208564	2613
0NONE_na_crispri_208565	1118
0NONE_na_crispri_208569	1674
[truncated: 4,203 more rows]

## Sheet: Untreated rep 1
0NONE_na_crispri_205283	1593
[truncated: 4,909 more rows]

[truncated: 1 more sheets: Untreated rep 2]
