# Supplementary material for: Retro-2 protects cells from ricin toxicity by inhibiting ASNA1-mediated ER targeting and insertion of tail-anchored proteins
Source: eLife. 2019 Nov 1;8:e48434. doi: 10.7554/eLife.48434 (PMC6858068; doi:10.7554/eLife.48434)
Supplement: Figure 1—source data 2. [file elife-48434-fig1-data2.xlsx]

## Sheet: Legend
		Sheets	Description								Columns	#GeneID	Symbol	GeneInfo	casTLE Effect	Combo casTLE Score	Minimum Effect Estimate	Maximum Effect Estimate
		Retro vs Retro plus Ricin rep 1	casTLE results for Retro vs Retro plus Ricin rep 1 comparison									Entrez ID	Gene Symbol	Gene info	Estimated gene effect size	Confidence score for estimated gene effect size	95% effect size credible interval lower bound	95% effect size credible interval upper bound
		Retro vs Retro plus Ricin rep 2	casTLE results for Retro vs Retro plus Ricin rep 2 comparison
		Retro vs Retro plus Ricin combo	casTLE results for Retro vs Retro plus Ricin combo comparison
		Ricin vs Retro plus Ricin rep 1	casTLE results for Ricin vs Retro plus Ricin rep1 comparision
		Ricin vs Retro plus Ricin rep 2	casTLE results for Ricin vs Retro plus Ricin rep2 comparision
		Ricin vs Retro plus Ricin combo	casTLE results for Ricin vs Retro plus Ricin combo comparision
		Ricin vs Retro,Ricin norm rep 1	casTLE results for Ricin vs Retro plus Ricin rep1 comparison, growth normalized
		Ricin vs Retro,Ricin norm rep 2	casTLE results for Ricin vs Retro plus Ricin rep2 comparison, growth normalized
		Ricin vs Retro,Ricin norm combo	casTLE results for Ricin vs Retro plus Ricin combocomparison, growth normalized
		Unt vs Ricin rep 1	casTLE results for Untreated vs Ricin rep1 comparision
		Unt vs Ricin rep 2	casTLE results for Untreated vs Ricin rep2 comparision
		Unt vs Ricin combo	casTLE results for Untreated vs Ricin combo comparision
		Unt vs Retro rep 1	casTLE results for Untreated vs Retro rep1 comparision
		Unt vs Retro rep 2	casTLE results for Untreated vs Retro rep2 comparision
		Unt vs Retro combo	casTLE results for Untreated vs Retro combo comparision

## Sheet: Unt vs Ricin combo
#GeneID	Symbol	GeneInfo	Combo casTLE Effect	Combo casTLE Score	Minimum Effect Estimate	Maximum Effect Estimate
11196	SEC23IP	SEC23 interacting protein	2.6	513	2.4	3.1
4249	MGAT5	mannosyl (alpha-1,6-)-glycoprotein beta-1,6-N-acetyl-glucosaminyltransferase	-5.9	482	-7	-5.5
55717	WDR11	WD repeat domain 11	-5	477	-5.8	-4.6
22878	TRAPPC8	trafficking protein particle complex 8	3.1	466	2.8	3.6
2762	GMDS	GDP-mannose 4,6-dehydratase	5	449	4.7	5.9
10483	SEC23B	Sec23 homolog B (S. cerevisiae)	3.4	448	3.2	4.1
51542	VPS54	vacuolar protein sorting 54 homolog (S. cerevisiae)	3.8	425	3.4	4.6
2683	B4GALT1	UDP-Gal:betaGlcNAc beta 1,4- galactosyltransferase, polypeptide 1	2.4	412	2.2	2.9
23071	ERP44	endoplasmic reticulum protein 44	2.8	370	2.5	3.3
9632	SEC24C	SEC24 family member C	3	342	2.8	3.6
5885	RAD21	RAD21 homolog (S. pombe)	-4.8	323	-5.7	-4.4
400	ARL1	ADP-ribosylation factor-like 1	-4	323	-4.8	-3.5
121665	SPPL3	signal peptide peptidase like 3	2.6	321	2.4	3.1
4247	MGAT2	mannosyl (alpha-1,6-)-glycoprotein beta-1,2-N-acetylglucosaminyltransferase	4	312	3.7	4.8
10802	SEC24A	SEC24 family member A	1.8	304	1.7	2.2
55275	VPS53	vacuolar protein sorting 53 homolog (S. cerevisiae)	2.5	303	2.2	3
27095	TRAPPC3	trafficking protein particle complex 3	2.8	286	2.5	3.4
6293	VPS52	vacuolar protein sorting 52 homolog (S. cerevisiae)	2.2	268	2	2.7
51430	SUCO	SUN domain containing ossification factor	3.6	265	3	4.3
7360	UGP2	UDP-glucose pyrophosphorylase 2	4	259	3.6	4.8
8907	AP1M1	adaptor-related protein complex 1, mu 1 subunit	-5.7	247	-6.8	-4.4
5861	RAB1A	RAB1A, member RAS oncogene family	3.1	245	2.9	3.9
56681	SAR1A	secretion associated, Ras related GTPase 1A	2.4	243	2.1	2.9
169714	QSOX2	quiescin Q6 sulfhydryl oxidase 2	4	243	3.5	4.9
6185	RPN2	ribophorin II	3.3	236	2.9	4.2
6484	ST3GAL4	ST3 beta-galactoside alpha-2,3-sialyltransferase 4	-2.7	228	-3.2	-2.4
6836	SURF4	surfeit 4	1.8	223	1.6	2.3
10498	CARM1	coactivator-associated arginine methyltransferase 1	2	222	1.7	2.4
9554	SEC22B	SEC22 vesicle trafficking protein homolog B (S. cerevisiae) (gene/pseudogene)	3.5	220	2.3	4.2
4170	MCL1	myeloid cell leukemia 1	-3.2	210	-3.7	-2.1
9126	SMC3	structural maintenance of chromosomes 3	-4.4	209	-5.4	-3.1
60559	SPCS3	signal peptidase complex subunit 3 homolog (S. cerevisiae)	2.9	209	2.6	3.7
25839	COG4	component of oligomeric golgi complex 4	-4.2	194	-5	-2.9
5591	PRKDC	protein kinase, DNA-activated, catalytic polypeptide	-3	191	-3.6	-2.6
10642	IGF2BP1	insulin-like growth factor 2 mRNA binding protein 1	1.6	177	1.4	2
439	ASNA1	arsA arsenite transporter, ATP-binding, homolog 1 (bacterial)	3.4	175	2.2	4.4
5862	RAB2A	RAB2A, member RAS oncogene family	1.7	172	1.4	2.2
60684	TRAPPC11	trafficking protein particle complex 11	2.9	166	2	3.5
890	CCNA2	cyclin A2	-2.1	162	-2.6	-1.8
10427	SEC24B	SEC24 family member B	1.9	157	1.4	2.4
1457	CSNK2A1	casein kinase 2, alpha 1 polypeptide	-1.9	154	-2.4	-1.6
2800	GOLGA1	golgin A1	1.2	149	1	1.5
50999	TMED5	transmembrane emp24 protein transport domain containing 5	1.2	148	1	1.5
3326	HSP90AB1	heat shock protein 90kDa alpha (cytosolic), class B member 1	1.5	146	1.3	1.9
126003	TRAPPC5	trafficking protein particle complex 5	2.1	145	1.9	2.9
83548	COG3	component of oligomeric golgi complex 3	-3.5	143	-4.4	-2.9
1981	EIF4G1	eukaryotic translation initiation factor 4 gamma, 1	2	142	1.5	2.5
81876	RAB1B	RAB1B, member RAS oncogene family	2.9	142	2.5	3.7
3692	EIF6	eukaryotic translation initiation factor 6	-3.9	141	-5.3	-3.3
9777	TM9SF4	transmembrane 9 superfamily protein member 4	-1.9	140	-2.3	-1.5
51138	COPS4	COP9 signalosome subunit 4	2.9	136	2.3	3.7
80018	NAA25	N(alpha)-acetyltransferase 25, NatB auxiliary subunit	-3.1	135	-3.8	-2.5
8570	KHSRP	KH-type splicing regulatory protein	1.4	134	1.3	1.9
375	ARF1	ADP-ribosylation factor 1	2.5	134	2.1	3.4
27333	GOLIM4	golgi integral membrane protein 4	-1.4	124	-1.8	-1.2
26225	ARL5A	ADP-ribosylation factor-like 5A	1.4	124	1.1	1.8
65264	UBE2Z	ubiquitin-conjugating enzyme E2Z	-2.3	116	-2.8	-1.9
221079	ARL5B	ADP-ribosylation factor-like 5B	1.3	115	1.2	1.8
10484	SEC23A	Sec23 homolog A (S. cerevisiae)	-2.5	114	-3.1	-1.9
8675	STX16	syntaxin 16	1	114	0.8	1.3
10142	AKAP9	A kinase (PRKA) anchor protein 9	-2	112	-2.5	-1.6
5770	PTPN1	protein tyrosine phosphatase, non-receptor type 1	-2.1	110	-2.8	-1.5
55015	PRPF39	pre-mRNA processing factor 39	-3.1	109	-3.9	-2.8
51693	TRAPPC2L	trafficking protein particle complex 2-like	2.5	108	2.2	3.6
3190	HNRNPK	heterogeneous nuclear ribonucleoprotein K	-2.6	106	-3.3	-2
6240	RRM1	ribonucleotide reductase M1	2.6	104	2.2	4
80218	NAA50	N(alpha)-acetyltransferase 50, NatE catalytic subunit	1.8	104	1.5	2.3
60481	ELOVL5	ELOVL fatty acid elongase 5	2.9	94.4	2.4	3.8
1315	COPB1	coatomer protein complex, subunit beta 1	-4.8	94.2	-8.2	-4.1
124245	ZC3H18	zinc finger CCCH-type containing 18	-2.1	92.1	-2.7	-1.6
9559	VPS26A	vacuolar protein sorting 26 homolog A (S. pombe)	-1.7	89.7	-2.1	-1.3
506	ATP5B	ATP synthase, H+ transporting, mitochondrial F1 complex, beta polypeptide	3.5	88.1	3.1	5.7
6124	RPL4	ribosomal protein L4	-3.4	86.5	-4.7	-1.9
6599	SMARCC1	SWI/SNF related, matrix associated, actin dependent regulator of chromatin, subfamily c, member 1	1.1	82.8	0.9	1.5
63035	BCORL1	BCL6 corepressor-like 1	-1.4	81.1	-2.7	-1
10146	G3BP1	GTPase activating protein (SH3 domain) binding protein 1	-1.4	80.7	-1.7	-1.1
5688	PSMA7	proteasome (prosome, macropain) subunit, alpha type, 7	3.2	80.2	2.1	4.7
9919	SEC16A	SEC16 homolog A (S. cerevisiae)	2.5	79.8	1.9	3.6
9039	UBA3	ubiquitin-like modifier activating enzyme 3	2.4	76.1	1.5	3
1639	DCTN1	dynactin 1	-1.7	76.1	-2.5	-1.4
7203	CCT3	chaperonin containing TCP1, subunit 3 (gamma)	-2.9	72	-4	-2.2
23256	SCFD1	sec1 family domain containing 1	2.9	71	2.5	5
1387	CREBBP	CREB binding protein	-1	70.9	-1.4	-0.8
23119	HIC2	hypermethylated in cancer 2	2.6	70.1	2.2	3.7
51552	RAB14	RAB14, member RAS oncogene family	0.9	69.4	0.7	1.2
58477	SRPRB	signal recognition particle receptor, B subunit	2.6	68.8	2	3.7
219988	PATL1	protein associated with topoisomerase II homolog 1 (yeast)	-1.3	68.1	-3.1	-1.2
152559	PAQR3	progestin and adipoQ receptor family member III	0.9	67.7	0.7	1.2
51096	UTP18	UTP18 small subunit (SSU) processome component homolog (yeast)	3.1	67.6	2.3	4.8
4738	NEDD8	neural precursor cell expressed, developmentally down-regulated 8	1.8	67.5	1.4	2.8
2804	GOLGB1	golgin B1	-4	67	-5.4	-3.5
5707	PSMD1	proteasome (prosome, macropain) 26S subunit, non-ATPase, 1	-2.4	66.7	-3.2	-1.3
51386	EIF3L	eukaryotic translation initiation factor 3, subunit L	-1.5	66.6	-2.3	-1.2
5694	PSMB6	proteasome (prosome, macropain) subunit, beta type, 6	2.6	65.9	2.2	4.5
5709	PSMD3	proteasome (prosome, macropain) 26S subunit, non-ATPase, 3	-0.8	64.6	-2.5	-0.7
85446	ZFHX2	zinc finger homeobox 2	-3.8	64.6	-6.4	-3.4
23352	UBR4	ubiquitin protein ligase E3 component n-recognin 4	1	62.8	0.8	1.5
51575	ESF1	ESF1, nucleolar pre-rRNA processing protein, homolog (S. cerevisiae)	-2	60.2	-3.2	-1.7
9054	NFS1	NFS1 cysteine desulfurase	-2.4	59.5	-3.7	-0.9
1314	COPA	coatomer protein complex, subunit alpha	-1.5	56.3	-2.1	-1.2
5706	PSMC6	proteasome (prosome, macropain) 26S subunit, ATPase, 6	-2.9	56.2	-4.1	-1.7
55837	EAPP	E2F-associated phosphoprotein	-1.9	56.2	-2.4	-1.4
54808	DYM	dymeclin	-1.8	55.2	-2.4	-0.8
10291	SF3A1	splicing factor 3a, subunit 1, 120kDa	-1.7	55	-2.1	-1.4
5717	PSMD11	proteasome (prosome, macropain) 26S subunit, non-ATPase, 11	-2.7	54.9	-3.3	-1.5
10575	CCT4	chaperonin containing TCP1, subunit 4 (delta)	-2.2	54.1	-3.5	-1.7
10036	CHAF1A	chromatin assembly factor 1, subunit A (p150)	2.4	53.9	2	4.3
55737	VPS35	vacuolar protein sorting 35 homolog (S. cerevisiae)	-1.4	53.8	-2	-1.1
10492	SYNCRIP	synaptotagmin binding, cytoplasmic RNA interacting protein	-0.9	52.8	-1.3	-0.7
3609	ILF3	interleukin enhancer binding factor 3, 90kDa	1.4	51.8	1.1	2
4904	YBX1	Y box binding protein 1	2	51.6	1.4	2.9
23212	RRS1	RRS1 ribosome biogenesis regulator homolog (S. cerevisiae)	-3.3	51.5	-5	-1.6
6634	SNRPD3	small nuclear ribonucleoprotein D3 polypeptide 18kDa	2.9	49.7	2.5	5.5
55610	CCDC132	coiled-coil domain containing 132	-1	49	-1.5	-0.8
4248	MGAT3	mannosyl (beta-1,4-)-glycoprotein beta-1,4-N-acetylglucosaminyltransferase	-1.5	48.8	-2.1	-1.1
5868	RAB5A	RAB5A, member RAS oncogene family	1.1	48.1	0.8	1.5
6729	SRP54	signal recognition particle 54kDa	0.8	46.8	0.6	1.2
4605	MYBL2	v-myb avian myeloblastosis viral oncogene homolog-like 2	-2.4	46	-3.5	-1
10342	TFG	TRK-fused gene	-1	45.9	-1.6	-0.8
6194	RPS6	ribosomal protein S6	1.5	45.7	1.1	2.4
1660	DHX9	DEAH (Asp-Glu-Ala-His) box helicase 9	-1.7	45.2	-2.3	-1.3
10992	SF3B2	splicing factor 3b, subunit 2, 145kDa	1.8	45.2	-2.7	3
5708	PSMD2	proteasome (prosome, macropain) 26S subunit, non-ATPase, 2	-1.9	45.1	-2.6	-1.4
5426	POLE	polymerase (DNA directed), epsilon, catalytic subunit	2.9	44.8	2.5	4.9
1350	COX7C	cytochrome c oxidase subunit VIIc	-2.1	43.9	-3.3	-1.6
3608	ILF2	interleukin enhancer binding factor 2	2.2	43.5	1.4	3.8
7026	NR2F2	nuclear receptor subfamily 2, group F, member 2	-2.4	43.1	-4	-1.9
7371	UCK2	uridine-cytidine kinase 2	-3.7	42.7	-6.7	-3.3
23160	WDR43	WD repeat domain 43	-1.8	42.5	-2.8	-1.3
8667	EIF3H	eukaryotic translation initiation factor 3, subunit H	3.7	42.4	-3.1	7
8661	EIF3A	eukaryotic translation initiation factor 3, subunit A	-2	41.2	-3.1	-1.5
51258	MRPL51	mitochondrial ribosomal protein L51	-2.1	40.3	-3.4	-0.9
27430	MAT2B	methionine adenosyltransferase II, beta	-3.1	40.2	-5.8	-2.4
5511	PPP1R8	protein phosphatase 1, regulatory subunit 8	1.1	38.7	0.7	1.8
7272	TTK	TTK protein kinase	-2.1	38.6	-4	1.8
6165	RPL35A	ribosomal protein L35a	-2.5	38.2	-4.1	-1.1
3006	HIST1H1C	histone cluster 1, H1c	-1	37.9	-1.3	-0.6
6301	SARS	seryl-tRNA synthetase	1.6	36.9	1.3	2.6
9276	COPB2	coatomer protein complex, subunit beta 2 (beta prime)	2.4	35.9	1.4	5
10972	TMED10	transmembrane emp24-like trafficking protein 10 (yeast)	-0.7	35.7	-1	-0.5
6651	SON	SON DNA binding protein	-2.7	35.6	-4.3	-1.6
285855	RPL7L1	ribosomal protein L7-like 1	-2.9	32.9	-3.8	-1
64746	ACBD3	acyl-CoA binding domain containing 3	0.6	32.3	0.5	1
55699	IARS2	isoleucyl-tRNA synthetase 2, mitochondrial	3	32	-3.9	6
1137	CHRNA4	cholinergic receptor, nicotinic, alpha 4 (neuronal)	-2.8	31	-5	-1.9
498	ATP5A1	ATP synthase, H+ transporting, mitochondrial F1 complex, alpha subunit 1, cardiac muscle	-1.9	30.9	-2.8	-1.4
79029	SPATA5L1	spermatogenesis associated 5-like 1	-1.2	30.7	-3.4	-1
6230	RPS25	ribosomal protein S25	1.1	29.9	0.8	1.7
643641	ZNF862	zinc finger protein 862	1.4	29.9	1	2.4
5700	PSMC1	proteasome (prosome, macropain) 26S subunit, ATPase, 1	-1.7	29.7	-2.5	-1
6721	SREBF2	sterol regulatory element binding transcription factor 2	0.7	27.9	0.4	1.1
5518	PPP2R1A	protein phosphatase 2, regulatory subunit A, alpha	2.2	27.5	1.1	3.8
9262	STK17B	serine/threonine kinase 17b	-3	26.9	-5.7	-2.4
25813	SAMM50	SAMM50 sorting and assembly machinery component	2	26.6	1	3.8
25879	DCAF13	DDB1 and CUL4 associated factor 13	-3.1	26.6	-5.9	-2.6
8664	EIF3D	eukaryotic translation initiation factor 3, subunit D	2.2	26.3	1.8	3.9
2091	FBL	fibrillarin	-1.8	26.1	-2.9	-0.8
8665	EIF3F	eukaryotic translation initiation factor 3, subunit F	-1.9	25.8	-3.8	-1.4
283870	BRICD5	BRICHOS domain containing 5	1.6	25.3	0.9	3
6160	RPL31	ribosomal protein L31	1.5	25.1	1.1	3
203068	TUBB	tubulin, beta class I	-0.9	24.3	-1.5	-0.5
6156	RPL30	ribosomal protein L30	2.8	24	2.4	5
372	ARCN1	archain 1	-1.8	23.3	-3	-1.2
84304	NUDT22	nudix (nucleoside diphosphate linked moiety X)-type motif 22	-1.7	23.2	-2.7	-1.3
10885	WDR3	WD repeat domain 3	-2.3	23.1	-3.8	-1.9
29882	ANAPC2	anaphase promoting complex subunit 2	-2.6	21.2	-5	-1.9
160	AP2A1	adaptor-related protein complex 2, alpha 1 subunit	1	20.8	0.6	1.6
27340	UTP20	UTP20, small subunit (SSU) processome component, homolog (yeast)	1.8	20.5	1.2	3.1
84548	TMEM185A	transmembrane protein 185A	1.7	20.4	1.4	3
29117	BRD7	bromodomain containing 7	-1	20	-1.5	-0.6
5704	PSMC4	proteasome (prosome, macropain) 26S subunit, ATPase, 4	-1.8	20	-3	2.1
23168	RTF1	Rtf1, Paf1/RNA polymerase II complex component, homolog (S. cerevisiae)	2	20	1.4	4
10075	HUWE1	HECT, UBA and WWE domain containing 1, E3 ubiquitin protein ligase	0.8	19.7	0.4	1.5
23028	KDM1A	lysine (K)-specific demethylase 1A	1	19.1	0.6	3.3
150946	GAREML	GRB2 associated, regulator of MAPK1-like	-0.6	18.8	-3.7	-0.5
10541	ANP32B	acidic (leucine-rich) nuclear phosphoprotein 32 family, member B	-2.2	18.7	-3.4	-1.2
8563	THOC5	THO complex 5	-0.9	18.4	-1.8	-0.5
23760	PITPNB	phosphatidylinositol transfer protein, beta	-1.4	18.4	-2.4	-0.8
6129	RPL7	ribosomal protein L7	1.8	17.8	-1	4
6154	RPL26	ribosomal protein L26	-0.8	17.8	-1.6	-0.4
8694	DGAT1	diacylglycerol O-acyltransferase 1	-0.5	17.5	-1	-0.3
1296	COL8A2	collagen, type VIII, alpha 2	0.6	16.5	0.3	1
259282	BOD1L1	biorientation of chromosomes in cell division 1-like 1	-2.1	16.3	-4	-0.4
9782	MATR3	matrin 3	-0.7	16	-1.1	-0.3
23469	PHF3	PHD finger protein 3	-0.7	15.8	-1.3	-0.4
10959	TMED2	transmembrane emp24 domain trafficking protein 2	-0.7	15.2	-1.3	-0.3
7917	BAG6	BCL2-associated athanogene 6	1.2	14.9	0.5	1.8
1984	EIF5A	eukaryotic translation initiation factor 5A	-2.7	14.6	-5	1.4
25853	DCAF12	DDB1 and CUL4 associated factor 12	-0.4	14.5	-0.7	-0.2
9399	STOML1	stomatin (EPB72)-like 1	-2.5	13.1	-4.2	-1
25900	IFFO1	intermediate filament family orphan 1	-1.5	12.6	-2.4	-1
8450	CUL4B	cullin 4B	0.4	11.8	0.2	0.8
7415	VCP	valosin containing protein	1.1	11.6	-1.6	2
23277	CLUH	clustered mitochondria (cluA/CLU1) homolog	-0.4	10.7	-1.2	-0.2
6181	RPLP2	ribosomal protein, large, P2	-1.6	10.6	-2.9	-0.8
646960	PRSS56	protease, serine, 56	0.9	10.4	0.5	1.9
116541	MRPL54	mitochondrial ribosomal protein L54	1	10.4	0.4	1.8
387264	KRTAP5-1	keratin associated protein 5-1	2.8	9.56	0.2	5
50807	ASAP1	ArfGAP with SH3 domain, ankyrin repeat and PH domain 1	-1.3	9.29	-2.3	-0.3
58533	SNX6	sorting nexin 6	0.3	9.07	0.1	1.9
55806	HR	hair growth associated	1.4	8.22	0.3	3
6449	SGTA	small glutamine-rich tetratricopeptide repeat (TPR)-containing, alpha	1.3	7.84	0.9	3
2302	FOXJ1	forkhead box J1	0.5	7.32	0.1	1.4
5031	P2RY6	pyrimidinergic receptor P2Y, G-protein coupled, 6	0.7	6.76	0.2	1.9
8943	AP3D1	adaptor-related protein complex 3, delta 1 subunit	0.4	6.67	0.1	1.4
1056	CEL	carboxyl ester lipase	1.2	6.37	-2.4	2
149699	GTSF1L	gametocyte specific factor 1-like	0.8	6.26	0.2	1.9
90933	TRIM41	tripartite motif containing 41	-0.4	5.64	-1.1	0.1
84283	TMEM79	transmembrane protein 79	-1.3	5.6	-2	-0.2
64130	LIN7B	lin-7 homolog B (C. elegans)	-0.5	5.59	-1.3	0.2
91419	XRCC6BP1	XRCC6 binding protein 1	0.5	4.67	-0.4	1.5
1139	CHRNA7	cholinergic receptor, nicotinic, alpha 7 (neuronal)	-0.3	4.5	-1.5	0.7
4677	NARS	asparaginyl-tRNA synthetase	-0.4	4.42	-1.4	0.9
11224	RPL35	ribosomal protein L35	-0.4	4.34	-2	0.3
3201	HOXA4	homeobox A4	0.5	3.93	-0.4	1.7
440270	GOLGA8B	golgin A8 family, member B	-1.1	3.9	-2	0.3
8295	TRRAP	transformation/transcription domain-associated protein	-0.6	3.83	-1.9	0.5
3320	HSP90AA1	heat shock protein 90kDa alpha (cytosolic), class A member 1	0.3	3.81	-0.2	1.3
10861	SLC26A1	solute carrier family 26 (anion exchanger), member 1	-1.4	3.44	-3	0.2
8989	TRPA1	transient receptor potential cation channel, subfamily A, member 1	-0.3	3.27	-1.5	0.3
10290	SPEG	SPEG complex locus	-0.2	3.17	-1	0.3
79979	TRMT2B	tRNA methyltransferase 2 homolog B (S. cerevisiae)	-0.6	3.11	-1.8	0.5
112609	MRAP2	melanocortin 2 receptor accessory protein 2	0.4	3.1	-0.3	1.5
3141	HLCS	holocarboxylase synthetase (biotin-(proprionyl-CoA-carboxylase (ATP-hydrolysing)) ligase)	-0.2	3.08	-1.2	0.4
283171	C11ORF44	chromosome 11 open reading frame 44	-1.3	2.99	-2	1.1
727940	RHOXF2B	Rhox homeobox family, member 2B	0.3	2.96	-0.5	1.6
166614	DCLK2	doublecortin-like kinase 2	0.3	2.95	-0.7	1.5
22930	RAB3GAP1	RAB3 GTPase activating protein subunit 1 (catalytic)	0.4	2.94	-0.4	1.6
6399	TRAPPC2	trafficking protein particle complex 2	0.2	2.93	-0.5	1.3
9706	ULK2	unc-51 like autophagy activating kinase 2	0.2	2.82	-0.8	1.4
23163	GGA3	golgi-associated, gamma adaptin ear containing, ARF binding protein 3	0.3	2.38	-2	0.9
81493	SYNC	syncoilin, intermediate filament protein	-0.6	2.37	-1.8	0.5
64283	ARHGEF28	Rho guanine nucleotide exchange factor (GEF) 28	-0.3	2.28	-1.7	0.8
55163	PNPO	pyridoxamine 5'-phosphate oxidase	0.3	2.22	-2	1.1
5867	RAB4A	RAB4A, member RAS oncogene family	0.2	2.21	-0.4	1.6
79822	ARHGAP28	Rho GTPase activating protein 28	-1.6	1.98	-3	0.4
6571	SLC18A2	solute carrier family 18 (vesicular monoamine transporter), member 2	0.3	1.95	-1.1	1.6
4897	NRCAM	neuronal cell adhesion molecule	-0.2	1.94	-1.6	0.8
8412	BCAR3	breast cancer anti-estrogen resistance 3	-0.2	1.84	-0.9	0.3
6596	HLTF	helicase-like transcription factor	-0.7	1.8	-1.9	0.4
196415	C12ORF77	chromosome 12 open reading frame 77	-1.7	1.74	-3	0.3
6155	RPL27	ribosomal protein L27	1.7	1.72	-0.6	3
55288	RHOT1	ras homolog family member T1	0.3	1.69	-0.8	1.7
100129520	LOC100129520	testis expressed sequence 13-like	-0.5	1.55	-1.8	0.4
27439	CECR6	cat eye syndrome chromosome region, candidate 6	-0.2	1.46	-2	0.3
56850	GRIPAP1	GRIP1 associated protein 1	-0.2	1.46	-1.6	0.7
8653	DDX3Y	DEAD (Asp-Glu-Ala-Asp) box helicase 3, Y-linked	0.2	1.29	-0.9	1.5
140032	RPS4Y2	ribosomal protein S4, Y-linked 2	-0.2	1.16	-1.9	0.4
353324	SPATA12	spermatogenesis associated 12	0.2	1.07	-1.2	1.5
51566	ARMCX3	armadillo repeat containing, X-linked 3	-0.1	1.05	-1.9	0.6
255488	RNF144B	ring finger protein 144B	-0.2	1	-1.5	1.1
118670	FAM24A	family with sequence similarity 24, member A	-0.1	0.794	-1.8	0.9
139324	HDX	highly divergent homeobox	0.3	0.782	-0.8	1.8
869	CBLN1	cerebellin 1 precursor	-0.1	0.64	-1.5	1.2
23526	HMHA1	histocompatibility (minor) HA-1	-0.1	0.62	-1.5	1.3
55504	TNFRSF19	tumor necrosis factor receptor superfamily, member 19	0.2	0.61	-0.3	1.4
51177	PLEKHO1	pleckstrin homology domain containing, family O member 1	0.1	0.499	-1.2	1.6
55244	SLC47A1	solute carrier family 47 (multidrug and toxin extrusion), member 1	-0.2	0.47	-1.5	1.3
9465	AKAP7	A kinase (PRKA) anchor protein 7	-0.1	0.462	-2	1
279	AMY2A	amylase, alpha 2A (pancreatic)	0.1	0.437	-2	0.7
5757	PTMA	prothymosin, alpha	-0.1	0.431	-1.8	1
221091	LRRN4CL	LRRN4 C-terminal like	0.1	0.379	-2	1.1
56124	PCDHB12	protocadherin beta 12	-0.1	0.323	-1.7	1.2
51495	PTPLAD1	protein tyrosine phosphatase-like A domain containing 1	0.2	0.314	-1.3	1.5
642517	AGAP9	ArfGAP with GTPase domain, ankyrin repeat and PH domain 9	-0.2	0.292	-1.8	0.9
79690	GAL3ST4	galactose-3-O-sulfotransferase 4	1.2	0.26	-0.3	2
25818	KLK5	kallikrein-related peptidase 5	0.1	0.203	-0.8	1.9
2939	GSTA2	glutathione S-transferase alpha 2	0.1	0.189	-1.3	1.6
64224	HERPUD2	HERPUD family member 2	-0.1	0.121	-1.4	1.5
147199	SCGB1C1	secretoglobin, family 1C, member 1	-0.2	0.0211	-1.6	1.2
84720	PIGO	phosphatidylinositol glycan anchor biosynthesis, class O	-0.1	0.0151	-2	0.4
10297	APC2	adenomatosis polyposis coli 2	0	0	-0.4	2
84189	SLITRK6	SLIT and NTRK-like family, member 6	0	0	-2	1.1
361	AQP4	aquaporin 4	0	0	-1.7	1.2
2134	EXTL1	exostosin-like glycosyltransferase 1	0	0	-1.5	1.4
89866	SEC16B	SEC16 homolog B (S. cerevisiae)	0	0	-1.8	1.2
100132146	LOC100132146	uncharacterized LOC100132146	0	0	-1.6	1.6
57661	PHRF1	PHD and ring finger domains 1	0	0	-1.2	1.8
8647	ABCB11	ATP-binding cassette, sub-family B (MDR/TAP), member 11	0	0	-1.7	1.2
59272	ACE2	angiotensin I converting enzyme 2	0	0	-1.7	1.4
LOC100289187	LOC100289187	N/A	0	0	-1.9	0.9
9457	FHL5	four and a half LIM domains 5	0	0	-1.5	1.5
6996	TDG	thymine-DNA glycosylase	0	0	-1.3	1.8
386682	KRTAP10-3	keratin associated protein 10-3	0	0	-0.6	3
23341	DNAJC16	DnaJ (Hsp40) homolog, subfamily C, member 16	0	0	-1.3	1.7
338328	GPIHBP1	glycosylphosphatidylinositol anchored high density lipoprotein binding protein 1	0	0	-1.2	1.8
285605	DTWD2	DTW domain containing 2	0	0	-1.3	1.6

## Sheet: Unt vs Ricin rep 1
#GeneID	Symbol	GeneInfo	Element #	casTLE Effect	casTLE Score	Minimum Effect Estimate	Maximum Effect Estimate
4249	MGAT5	mannosyl (alpha-1,6-)-glycoprotein beta-1,6-N-acetyl-glucosaminyltransferase	10	-6	260	-8.4	-5.4
51542	VPS54	vacuolar protein sorting 54 homolog (S. cerevisiae)	10	4	243	3.5	5.7
55717	WDR11	WD repeat domain 11	10	-4.8	243	-6.7	-4.4
11196	SEC23IP	SEC23 interacting protein	10	2.4	239	2.2	3.5
10483	SEC23B	Sec23 homolog B (S. cerevisiae)	10	3.4	232	3.1	4.9
2762	GMDS	GDP-mannose 4,6-dehydratase	10	5.1	230	4.7	7.2
22878	TRAPPC8	trafficking protein particle complex 8	10	3.1	203	2.8	4.4
2683	B4GALT1	UDP-Gal:betaGlcNAc beta 1,4- galactosyltransferase, polypeptide 1	10	2.4	196	2.1	3.5
4247	MGAT2	mannosyl (alpha-1,6-)-glycoprotein beta-1,2-N-acetylglucosaminyltransferase	10	4.1	184	3.7	5.9
5885	RAD21	RAD21 homolog (S. pombe)	10	-4.6	170	-6.7	-4.2
23071	ERP44	endoplasmic reticulum protein 44	10	2.8	165	2.5	4
9554	SEC22B	SEC22 vesicle trafficking protein homolog B (S. cerevisiae) (gene/pseudogene)	9	2.3	165	2	3.4
6293	VPS52	vacuolar protein sorting 52 homolog (S. cerevisiae)	10	2.3	151	1.9	3.3
121665	SPPL3	signal peptide peptidase like 3	10	2.7	151	2.3	3.8
6484	ST3GAL4	ST3 beta-galactoside alpha-2,3-sialyltransferase 4	10	-2.7	150	-3.9	-2.4
400	ARL1	ADP-ribosylation factor-like 1	10	-4.1	142	-6	-3.5
27095	TRAPPC3	trafficking protein particle complex 3	10	2.8	134	2.3	4
55275	VPS53	vacuolar protein sorting 53 homolog (S. cerevisiae)	10	2.4	134	2	3.4
8907	AP1M1	adaptor-related protein complex 1, mu 1 subunit	10	-5.8	130	-8.6	-5
10802	SEC24A	SEC24 family member A	10	1.8	130	1.6	2.6
4170	MCL1	myeloid cell leukemia 1	10	-3.3	128	-4.8	-2.1
56681	SAR1A	secretion associated, Ras related GTPase 1A	10	2.5	120	2.1	3.6
5591	PRKDC	protein kinase, DNA-activated, catalytic polypeptide	10	-3.1	120	-4.4	-2.6
9632	SEC24C	SEC24 family member C	10	2.9	119	2.6	4.2
51430	SUCO	SUN domain containing ossification factor	10	3.2	115	2.6	4.6
5861	RAB1A	RAB1A, member RAS oncogene family	10	3.2	112	2.7	4.7
10498	CARM1	coactivator-associated arginine methyltransferase 1	10	1.9	109	1.6	2.9
7360	UGP2	UDP-glucose pyrophosphorylase 2	10	3.9	105	3.2	5.6
10427	SEC24B	SEC24 family member B	10	2	105	1.6	3.1
9126	SMC3	structural maintenance of chromosomes 3	8	-3.2	105	-5.1	-2.7
25839	COG4	component of oligomeric golgi complex 4	10	-4.3	104	-6.4	-2.6
6836	SURF4	surfeit 4	10	1.8	104	1.5	2.8
60559	SPCS3	signal peptidase complex subunit 3 homolog (S. cerevisiae)	18	3.1	97.6	2.4	4.6
6185	RPN2	ribophorin II	10	3	95.5	2.7	4.9
169714	QSOX2	quiescin Q6 sulfhydryl oxidase 2	10	4.2	95.5	3.3	6.7
890	CCNA2	cyclin A2	10	-2.1	88.7	-3.1	-1.6
3190	HNRNPK	heterogeneous nuclear ribonucleoprotein K	9	-2.7	88.5	-4	-2
81876	RAB1B	RAB1B, member RAS oncogene family	9	2.9	86.2	2.1	4.4
1457	CSNK2A1	casein kinase 2, alpha 1 polypeptide	10	-2.1	85.5	-3.1	-1.6
126003	TRAPPC5	trafficking protein particle complex 5	10	2.3	83.4	1.8	3.4
50999	TMED5	transmembrane emp24 protein transport domain containing 5	10	1.2	82.4	1	1.7
5862	RAB2A	RAB2A, member RAS oncogene family	10	1.5	80.7	1.2	2.3
2800	GOLGA1	golgin A1	10	1.2	79.3	0.9	1.7
439	ASNA1	arsA arsenite transporter, ATP-binding, homolog 1 (bacterial)	10	2.3	78.8	1.7	3.6
5770	PTPN1	protein tyrosine phosphatase, non-receptor type 1	10	-2.5	78.6	-3.5	-1.6
3326	HSP90AB1	heat shock protein 90kDa alpha (cytosolic), class B member 1	10	1.5	78.3	1.3	2.3
9777	TM9SF4	transmembrane 9 superfamily protein member 4	10	-1.8	77.4	-2.7	-1.4
60684	TRAPPC11	trafficking protein particle complex 11	9	2	73.6	1.6	3.2
83548	COG3	component of oligomeric golgi complex 3	8	-3.3	73.4	-5.5	-2.7
27333	GOLIM4	golgi integral membrane protein 4	10	-1.3	67.5	-2.1	-1.1
1639	DCTN1	dynactin 1	10	-1.9	67.2	-2.8	-1.3
65264	UBE2Z	ubiquitin-conjugating enzyme E2Z	10	-2.4	66.5	-3.6	-1.7
8675	STX16	syntaxin 16	10	1.1	66.3	0.9	1.7
375	ARF1	ADP-ribosylation factor 1	10	2.5	66.3	2	4.3
10642	IGF2BP1	insulin-like growth factor 2 mRNA binding protein 1	10	1.7	64.8	1.4	2.5
26225	ARL5A	ADP-ribosylation factor-like 5A	10	1.4	64.4	1.1	2.3
10484	SEC23A	Sec23 homolog A (S. cerevisiae)	10	-2.5	63.5	-3.7	-1.5
10142	AKAP9	A kinase (PRKA) anchor protein 9	10	-1.8	62.6	-2.6	-1.3
1981	EIF4G1	eukaryotic translation initiation factor 4 gamma, 1	9	2.2	62.6	1.6	3.4
3692	EIF6	eukaryotic translation initiation factor 6	6	-4	62.1	-7.4	-3.4
55015	PRPF39	pre-mRNA processing factor 39	10	-3	59.3	-4.5	-2.6
221079	ARL5B	ADP-ribosylation factor-like 5B	10	1.5	58.8	1.2	2.3
51138	COPS4	COP9 signalosome subunit 4	10	3.1	57	2.3	5.5
6124	RPL4	ribosomal protein L4	9	-2	55.4	-3.6	-1.7
8570	KHSRP	KH-type splicing regulatory protein	9	1.4	55.3	1.1	2.3
51575	ESF1	ESF1, nucleolar pre-rRNA processing protein, homolog (S. cerevisiae)	17	-2.1	54.2	-3.7	-1.8
10575	CCT4	chaperonin containing TCP1, subunit 4 (delta)	7	-2.3	53.3	-3.7	-1.8
506	ATP5B	ATP synthase, H+ transporting, mitochondrial F1 complex, beta polypeptide	6	-2.5	52.9	-5	5.6
80218	NAA50	N(alpha)-acetyltransferase 50, NatE catalytic subunit	10	1.6	52.8	1	2.4
4738	NEDD8	neural precursor cell expressed, developmentally down-regulated 8	8	1.9	51.7	1.5	3.5
7203	CCT3	chaperonin containing TCP1, subunit 3 (gamma)	9	-3	51.3	-5.3	-2.4
10146	G3BP1	GTPase activating protein (SH3 domain) binding protein 1	10	-1.4	49.7	-2.2	-1.1
58477	SRPRB	signal recognition particle receptor, B subunit	10	2.8	49.3	2.3	4.6
9559	VPS26A	vacuolar protein sorting 26 homolog A (S. pombe)	9	-1.7	49.2	-2.5	-1
80018	NAA25	N(alpha)-acetyltransferase 25, NatB auxiliary subunit	8	-2.5	48.8	-4.2	-1.4
51552	RAB14	RAB14, member RAS oncogene family	10	1	47.7	0.7	1.6
5709	PSMD3	proteasome (prosome, macropain) 26S subunit, non-ATPase, 3	9	-2.4	46.8	-3.8	-0.7
51693	TRAPPC2L	trafficking protein particle complex 2-like	10	2.6	46.2	2.1	4.5
6599	SMARCC1	SWI/SNF related, matrix associated, actin dependent regulator of chromatin, subfamily c, member 1	9	1.2	44.8	0.9	1.8
85446	ZFHX2	zinc finger homeobox 2	20	-3.7	44.5	-6.9	-3.3
124245	ZC3H18	zinc finger CCCH-type containing 18	10	-1.5	44.3	-2.3	-1.1
23212	RRS1	RRS1 ribosome biogenesis regulator homolog (S. cerevisiae)	6	-3.4	43.4	-5.9	-2.8
60481	ELOVL5	ELOVL fatty acid elongase 5	10	2.7	42.2	1.2	4.6
4605	MYBL2	v-myb avian myeloblastosis viral oncogene homolog-like 2	8	-2.4	41.9	-4.6	-1.5
6240	RRM1	ribonucleotide reductase M1	6	2.4	41.3	2	4
152559	PAQR3	progestin and adipoQ receptor family member III	10	0.9	41.1	0.6	1.5
51258	MRPL51	mitochondrial ribosomal protein L51	8	-2.1	40.2	-4	-1.3
63035	BCORL1	BCL6 corepressor-like 1	10	-1	40.2	-1.7	-0.8
1387	CREBBP	CREB binding protein	10	-1	39.2	-1.6	-0.7
2804	GOLGB1	golgin B1	10	-1.1	38.8	-6	-0.4
10992	SF3B2	splicing factor 3b, subunit 2, 145kDa	8	-2	38.5	-3.6	-1.4
6165	RPL35A	ribosomal protein L35a	8	-2.5	38.4	-4.8	-1.8
9054	NFS1	NFS1 cysteine desulfurase	10	-2.3	37.3	-3.9	-1.1
1350	COX7C	cytochrome c oxidase subunit VIIc	10	-2.1	36.9	-3.9	-1.4
3609	ILF3	interleukin enhancer binding factor 3, 90kDa	10	1.5	35.9	1.1	2.5
51096	UTP18	UTP18 small subunit (SSU) processome component homolog (yeast)	10	3.2	35.8	2.6	5.8
6651	SON	SON DNA binding protein	17	-2.7	35.6	-4.7	-2.1
55737	VPS35	vacuolar protein sorting 35 homolog (S. cerevisiae)	8	3.8	35.2	3.4	6.9
4904	YBX1	Y box binding protein 1	10	2.2	34.6	0.7	4
54808	DYM	dymeclin	9	-1.8	34.5	-2.8	-0.6
55837	EAPP	E2F-associated phosphoprotein	10	-1.5	34.4	-2.3	-0.9
23352	UBR4	ubiquitin protein ligase E3 component n-recognin 4	10	1.1	32.7	0.8	1.9
1315	COPB1	coatomer protein complex, subunit beta 1	3	-3	32.5	-5.7	-2.7
7026	NR2F2	nuclear receptor subfamily 2, group F, member 2	10	-2.2	32.5	-3.9	-1.8
5688	PSMA7	proteasome (prosome, macropain) subunit, alpha type, 7	8	2.2	31.3	1.8	4
5707	PSMD1	proteasome (prosome, macropain) 26S subunit, non-ATPase, 1	6	-1.7	31.2	-2.8	-1.2
1314	COPA	coatomer protein complex, subunit alpha	8	2.2	31.1	-1.7	4
8661	EIF3A	eukaryotic translation initiation factor 3, subunit A	6	-1.9	30.6	-3.7	-1.3
5717	PSMD11	proteasome (prosome, macropain) 26S subunit, non-ATPase, 11	10	-2.8	30.5	-4.3	-1.5
6194	RPS6	ribosomal protein S6	8	1.5	30.2	0.9	2.6
10036	CHAF1A	chromatin assembly factor 1, subunit A (p150)	8	2.3	29.8	1.8	4
1660	DHX9	DEAH (Asp-Glu-Ala-His) box helicase 9	10	-1.8	28.9	-2.8	-1.3
5706	PSMC6	proteasome (prosome, macropain) 26S subunit, ATPase, 6	7	-2.9	28.7	-5.6	-2.3
4248	MGAT3	mannosyl (beta-1,4-)-glycoprotein beta-1,4-N-acetylglucosaminyltransferase	9	-1.5	27.7	-2.5	-0.9
25879	DCAF13	DDB1 and CUL4 associated factor 13	9	-3.2	27.5	-5.9	-2.8
10492	SYNCRIP	synaptotagmin binding, cytoplasmic RNA interacting protein	9	-1	27.4	-1.7	-0.6
8665	EIF3F	eukaryotic translation initiation factor 3, subunit F	8	-1.9	26	-3.7	-1.5
5708	PSMD2	proteasome (prosome, macropain) 26S subunit, non-ATPase, 2	9	1.7	25.9	-1.1	3
9039	UBA3	ubiquitin-like modifier activating enzyme 3	9	1.3	24.8	0.9	2.5
283870	BRICD5	BRICHOS domain containing 5	10	1.8	24.4	1.2	3
29882	ANAPC2	anaphase promoting complex subunit 2	8	-2.6	23.8	-5	-2.1
5700	PSMC1	proteasome (prosome, macropain) 26S subunit, ATPase, 1	7	2.2	23.5	-2.3	4
3006	HIST1H1C	histone cluster 1, H1c	10	-1.1	23.5	-1.7	-0.6
5511	PPP1R8	protein phosphatase 1, regulatory subunit 8	10	1.4	23.3	0.6	2.4
5868	RAB5A	RAB5A, member RAS oncogene family	10	1	23.3	0.6	1.8
23168	RTF1	Rtf1, Paf1/RNA polymerase II complex component, homolog (S. cerevisiae)	8	2	22.9	1.6	4
27430	MAT2B	methionine adenosyltransferase II, beta	20	-2.2	22	-4	-0.6
9919	SEC16A	SEC16 homolog A (S. cerevisiae)	10	2.7	21.7	2	4.9
5694	PSMB6	proteasome (prosome, macropain) subunit, beta type, 6	17	1.9	21.5	1.4	4
23160	WDR43	WD repeat domain 43	7	-1.9	21.4	-4	-1.4
7371	UCK2	uridine-cytidine kinase 2	9	-3.5	21.3	-7	-3.3
25813	SAMM50	SAMM50 sorting and assembly machinery component	5	-1.7	21.3	-2.9	-1.4
150946	GAREML	GRB2 associated, regulator of MAPK1-like	20	-2.4	20.7	-4	-1.7
79029	SPATA5L1	spermatogenesis associated 5-like 1	9	-1.2	20.5	-2	-1
51386	EIF3L	eukaryotic translation initiation factor 3, subunit L	10	-1.4	20.4	-2.5	-1
6634	SNRPD3	small nuclear ribonucleoprotein D3 polypeptide 18kDa	7	-1.3	20.4	-2	-1
10291	SF3A1	splicing factor 3a, subunit 1, 120kDa	17	-1.6	20	-2.7	-1.1
55610	CCDC132	coiled-coil domain containing 132	10	-1.2	19.8	-1.8	-0.5
259282	BOD1L1	biorientation of chromosomes in cell division 1-like 1	20	-2.1	19.4	-4	-1.7
6721	SREBF2	sterol regulatory element binding transcription factor 2	10	0.7	19.4	0.4	1.6
6729	SRP54	signal recognition particle 54kDa	10	0.7	19.2	0.4	1.3
219988	PATL1	protein associated with topoisomerase II homolog 1 (yeast)	10	-1.7	19	-2.7	-1.2
6301	SARS	seryl-tRNA synthetase	6	1.7	19	-3.2	3
8563	THOC5	THO complex 5	7	-1.2	18.6	-1.9	-0.7
8667	EIF3H	eukaryotic translation initiation factor 3, subunit H	9	3	18.4	-1.4	5
6156	RPL30	ribosomal protein L30	7	-0.7	18.1	-1.7	-0.5
203068	TUBB	tubulin, beta class I	16	-0.9	17.9	-2	-0.5
64746	ACBD3	acyl-CoA binding domain containing 3	10	0.7	17.8	0.4	1.3
6230	RPS25	ribosomal protein S25	10	1.1	17.7	0.7	1.9
23119	HIC2	hypermethylated in cancer 2	20	2.7	17.7	2.2	4.6
8694	DGAT1	diacylglycerol O-acyltransferase 1	10	-0.6	17.6	-1.2	-0.3
10342	TFG	TRK-fused gene	10	-0.9	16.7	-1.7	-0.5
7272	TTK	TTK protein kinase	8	-1.3	16.3	-2	1.5
23028	KDM1A	lysine (K)-specific demethylase 1A	10	2.6	15.8	0.9	4.8
160	AP2A1	adaptor-related protein complex 2, alpha 1 subunit	10	0.8	15.7	0.4	1.6
5426	POLE	polymerase (DNA directed), epsilon, catalytic subunit	9	-1.6	14.1	-2.9	-1
498	ATP5A1	ATP synthase, H+ transporting, mitochondrial F1 complex, alpha subunit 1, cardiac muscle	20	-1.6	13.9	-2.8	-1.1
10972	TMED10	transmembrane emp24-like trafficking protein 10 (yeast)	9	-0.5	13.7	-1.2	-0.2
10075	HUWE1	HECT, UBA and WWE domain containing 1, E3 ubiquitin protein ligase	10	1	13.6	0.7	2
643641	ZNF862	zinc finger protein 862	10	1.3	12.8	0.8	2
285855	RPL7L1	ribosomal protein L7-like 1	10	-3	12.7	-6	-1.3
9782	MATR3	matrin 3	10	-0.7	12.1	-1.6	-0.3
2091	FBL	fibrillarin	6	-0.8	11.9	-2	1.2
84304	NUDT22	nudix (nucleoside diphosphate linked moiety X)-type motif 22	10	-1.8	11.7	-3	-1.3
116541	MRPL54	mitochondrial ribosomal protein L54	10	1.2	11.7	0.5	1.9
23469	PHF3	PHD finger protein 3	9	-0.8	11.5	-1.7	-0.4
29117	BRD7	bromodomain containing 7	10	-1	11.2	-1.9	-0.6
10885	WDR3	WD repeat domain 3	8	0.9	10.7	-1.7	2
646960	PRSS56	protease, serine, 56	10	1	10.5	0.6	2
1296	COL8A2	collagen, type VIII, alpha 2	10	0.6	10.5	0.3	1.6
23256	SCFD1	sec1 family domain containing 1	7	0.9	10.2	-1.3	2
372	ARCN1	archain 1	3	-1.2	10	-2	-0.7
55699	IARS2	isoleucyl-tRNA synthetase 2, mitochondrial	5	-2.9	9.86	-5	-2.3
1984	EIF5A	eukaryotic translation initiation factor 5A	9	-2.8	9.8	-5	-0.9
387264	KRTAP5-1	keratin associated protein 5-1	10	2.9	9.79	2.3	5
3608	ILF2	interleukin enhancer binding factor 2	6	-1.8	9.63	-3	-0.9
10541	ANP32B	acidic (leucine-rich) nuclear phosphoprotein 32 family, member B	10	-1.5	9.5	-3	-0.6
10959	TMED2	transmembrane emp24 domain trafficking protein 2	10	-0.4	9.28	-1.4	-0.2
5704	PSMC4	proteasome (prosome, macropain) 26S subunit, ATPase, 4	5	0.9	8.56	-2.5	2
5518	PPP2R1A	protein phosphatase 2, regulatory subunit A, alpha	20	1	8.52	0.5	2
7415	VCP	valosin containing protein	6	0.8	8.3	-1.6	2
9399	STOML1	stomatin (EPB72)-like 1	10	-1.4	7.94	-3	-0.9
7917	BAG6	BCL2-associated athanogene 6	10	0.5	7.93	0.1	1.5
23760	PITPNB	phosphatidylinositol transfer protein, beta	10	-1	7.81	-2	-0.6
1137	CHRNA4	cholinergic receptor, nicotinic, alpha 4 (neuronal)	10	-1.4	7.48	-3	-0.7
8943	AP3D1	adaptor-related protein complex 3, delta 1 subunit	9	0.6	7.1	0.2	1.8
6129	RPL7	ribosomal protein L7	9	1.1	6.58	-1.1	2
64130	LIN7B	lin-7 homolog B (C. elegans)	10	-0.5	6.39	-1.8	0
6160	RPL31	ribosomal protein L31	4	-0.6	6.36	-2	-0.1
8450	CUL4B	cullin 4B	10	0.3	6.2	0	1.5
11224	RPL35	ribosomal protein L35	9	-1.2	5.69	-2	0.6
9276	COPB2	coatomer protein complex, subunit beta 2 (beta prime)	5	-0.8	5.41	-2	-0.1
8664	EIF3D	eukaryotic translation initiation factor 3, subunit D	7	-1.1	5.3	-2	2.6
23277	CLUH	clustered mitochondria (cluA/CLU1) homolog	10	-0.3	5.16	-1.7	0.2
3320	HSP90AA1	heat shock protein 90kDa alpha (cytosolic), class A member 1	10	0.4	5	-0.2	1.8
6154	RPL26	ribosomal protein L26	8	-0.4	4.96	-2	0.2
84548	TMEM185A	transmembrane protein 185A	10	-1.1	4.66	-2	2.8
6155	RPL27	ribosomal protein L27	7	1.7	4.65	0	3
5031	P2RY6	pyrimidinergic receptor P2Y, G-protein coupled, 6	10	1	4.63	-0.1	2
149699	GTSF1L	gametocyte specific factor 1-like	10	1	4.41	-0.2	2
50807	ASAP1	ArfGAP with SH3 domain, ankyrin repeat and PH domain 1	10	-1.4	4.25	-3	-0.1
58533	SNX6	sorting nexin 6	10	1.5	4.2	0.1	3
166614	DCLK2	doublecortin-like kinase 2	10	0.4	3.91	-0.3	2
6571	SLC18A2	solute carrier family 18 (vesicular monoamine transporter), member 2	9	0.3	3.9	-0.3	2
27340	UTP20	UTP20, small subunit (SSU) processome component, homolog (yeast)	9	1.5	3.6	-1.6	3
25853	DCAF12	DDB1 and CUL4 associated factor 12	10	-0.3	3.43	-2	0.6
6399	TRAPPC2	trafficking protein particle complex 2	10	0.3	3.36	-0.6	2
283171	C11ORF44	chromosome 11 open reading frame 44	10	0.7	3.33	-1.2	2
6449	SGTA	small glutamine-rich tetratricopeptide repeat (TPR)-containing, alpha	10	1.1	3.1	-0.7	2
55163	PNPO	pyridoxamine 5'-phosphate oxidase	10	0.4	2.77	-1.8	2
112609	MRAP2	melanocortin 2 receptor accessory protein 2	10	0.4	2.67	-0.7	2
8295	TRRAP	transformation/transcription domain-associated protein	9	-1	2.66	-2	0.5
1139	CHRNA7	cholinergic receptor, nicotinic, alpha 7 (neuronal)	10	-0.6	2.64	-2	1.3
25900	IFFO1	intermediate filament family orphan 1	20	-1.6	2.51	-3	0.6
56850	GRIPAP1	GRIP1 associated protein 1	10	-0.3	2.5	-2	0.7
3141	HLCS	holocarboxylase synthetase (biotin-(proprionyl-CoA-carboxylase (ATP-hydrolysing)) ligase)	19	-0.4	2.4	-2	0.6
22930	RAB3GAP1	RAB3 GTPase activating protein subunit 1 (catalytic)	10	0.4	2.34	-0.8	2
727940	RHOXF2B	Rhox homeobox family, member 2B	10	0.3	2.32	-1	2
10290	SPEG	SPEG complex locus	19	-0.2	2.26	-1.6	1
90933	TRIM41	tripartite motif containing 41	10	-0.5	2.25	-2	0.8
2302	FOXJ1	forkhead box J1	10	0.5	2.21	-0.6	2
27439	CECR6	cat eye syndrome chromosome region, candidate 6	10	-1.1	2.19	-2	0.7
8989	TRPA1	transient receptor potential cation channel, subfamily A, member 1	10	-0.3	2.18	-2	0.9
4677	NARS	asparaginyl-tRNA synthetase	8	-0.3	2.07	-1.8	1.6
279	AMY2A	amylase, alpha 2A (pancreatic)	10	-0.8	2.04	-2	1
64283	ARHGEF28	Rho guanine nucleotide exchange factor (GEF) 28	10	-0.7	2.01	-2	1.1
84283	TMEM79	transmembrane protein 79	10	-1.4	1.97	-2	0.9
147199	SCGB1C1	secretoglobin, family 1C, member 1	10	-0.2	1.78	-1.9	1.3
869	CBLN1	cerebellin 1 precursor	10	-0.2	1.75	-2	1
84720	PIGO	phosphatidylinositol glycan anchor biosynthesis, class O	10	-0.9	1.7	-2	0.7
9262	STK17B	serine/threonine kinase 17b	10	-1.7	1.67	-3	0.5
9706	ULK2	unc-51 like autophagy activating kinase 2	10	0.3	1.66	-1.1	2
386682	KRTAP10-3	keratin associated protein 10-3	10	1.5	1.63	-0.6	3
23163	GGA3	golgi-associated, gamma adaptin ear containing, ARF binding protein 3	10	0.3	1.62	-1.8	1.6
196415	C12ORF77	chromosome 12 open reading frame 77	10	-1.8	1.54	-3	1
79979	TRMT2B	tRNA methyltransferase 2 homolog B (S. cerevisiae)	10	-0.6	1.49	-2	1.2
55244	SLC47A1	solute carrier family 47 (multidrug and toxin extrusion), member 1	10	-0.2	1.46	-2	1.3
642517	AGAP9	ArfGAP with GTPase domain, ankyrin repeat and PH domain 9	10	-0.4	1.46	-2	1
2134	EXTL1	exostosin-like glycosyltransferase 1	10	-0.2	1.45	-2	1
1056	CEL	carboxyl ester lipase	10	0.3	1.41	-2	1.2
79822	ARHGAP28	Rho GTPase activating protein 28	10	-1.2	1.4	-2	1.1
4897	NRCAM	neuronal cell adhesion molecule	10	-0.3	1.29	-2	1.3
6181	RPLP2	ribosomal protein, large, P2	8	0.3	1.26	-1.4	2
8412	BCAR3	breast cancer anti-estrogen resistance 3	20	-0.1	1.24	-1.7	1.1
55504	TNFRSF19	tumor necrosis factor receptor superfamily, member 19	20	0.2	1.21	-0.5	2
440270	GOLGA8B	golgin A8 family, member B	10	-1.2	1.18	-2	1.3
10861	SLC26A1	solute carrier family 26 (anion exchanger), member 1	10	-1.4	1.1	-3	0.7
6596	HLTF	helicase-like transcription factor	10	-0.2	1.1	-1.8	1.6
91419	XRCC6BP1	XRCC6 binding protein 1	10	0.5	1.1	-1	2
51177	PLEKHO1	pleckstrin homology domain containing, family O member 1	10	0.2	1.07	-1.2	2
51495	PTPLAD1	protein tyrosine phosphatase-like A domain containing 1	10	0.2	0.927	-1.3	2
57661	PHRF1	PHD and ring finger domains 1	10	0.4	0.923	-1.3	2
51566	ARMCX3	armadillo repeat containing, X-linked 3	10	-0.2	0.872	-2	1.1
255488	RNF144B	ring finger protein 144B	10	-0.2	0.804	-2	1.4
81493	SYNC	syncoilin, intermediate filament protein	10	-0.6	0.758	-2	1.2
221091	LRRN4CL	LRRN4 C-terminal like	10	-1.2	0.68	-2	1.1
23526	HMHA1	histocompatibility (minor) HA-1	10	-0.1	0.631	-1.9	1.5
55806	HR	hair growth associated	20	1.4	0.572	-1.7	2
8653	DDX3Y	DEAD (Asp-Glu-Ala-Asp) box helicase 3, Y-linked	10	0.2	0.508	-1.5	1.9
353324	SPATA12	spermatogenesis associated 12	10	0.1	0.448	-1.4	2
3201	HOXA4	homeobox A4	10	0.2	0.366	-1.4	2
285605	DTWD2	DTW domain containing 2	10	-0.1	0.314	-1.8	1.7
118670	FAM24A	family with sequence similarity 24, member A	10	-0.1	0.27	-1.5	2
55288	RHOT1	ras homolog family member T1	10	-0.2	0.246	-2	1.4
2939	GSTA2	glutathione S-transferase alpha 2	10	0.1	0.142	-1.7	1.8
5867	RAB4A	RAB4A, member RAS oncogene family	10	0.2	0.133	-1.3	2
140032	RPS4Y2	ribosomal protein S4, Y-linked 2	10	-0.1	0.0837	-2	1.3
64224	HERPUD2	HERPUD family member 2	10	0.1	0.0535	-1.7	1.8
5757	PTMA	prothymosin, alpha	10	-0.1	0.0412	-1.9	1.6
25818	KLK5	kallikrein-related peptidase 5	10	0.2	0.0307	-1.4	2
9457	FHL5	four and a half LIM domains 5	10	-0.1	0.0197	-1.7	1.8
84189	SLITRK6	SLIT and NTRK-like family, member 6	10	0	0	-2	1.4
361	AQP4	aquaporin 4	10	0	0	-2	1.5
9465	AKAP7	A kinase (PRKA) anchor protein 7	10	0	0	-1.6	1.9
100129520	LOC100129520	testis expressed sequence 13-like	10	0	0	-1.6	1.9
139324	HDX	highly divergent homeobox	10	0	0	-1.7	1.8
89866	SEC16B	SEC16 homolog B (S. cerevisiae)	10	0	0	-2	1.5
59272	ACE2	angiotensin I converting enzyme 2	10	0	0	-1.9	1.7
8647	ABCB11	ATP-binding cassette, sub-family B (MDR/TAP), member 11	10	0	0	-1.9	1.6
LOC100289187	LOC100289187	N/A	10	0	0	-1.8	1.8
56124	PCDHB12	protocadherin beta 12	10	0	0	-1.9	1.6
6996	TDG	thymine-DNA glycosylase	10	0	0	-1.7	1.9
100132146	LOC100132146	uncharacterized LOC100132146	10	0	0	-1.8	1.8
79690	GAL3ST4	galactose-3-O-sulfotransferase 4	20	0	0	-0.6	2
23341	DNAJC16	DnaJ (Hsp40) homolog, subfamily C, member 16	10	0	0	-1.5	2
10297	APC2	adenomatosis polyposis coli 2	19	0	0	-1.1	2
338328	GPIHBP1	glycosylphosphatidylinositol anchored high density lipoprotein binding protein 1	10	0	0	-1.5	2

## Sheet: Unt vs Ricin rep 2
#GeneID	Symbol	GeneInfo	Element #	casTLE Effect	casTLE Score	Minimum Effect Estimate	Maximum Effect Estimate
11196	SEC23IP	SEC23 interacting protein	10	2.7	276	2.4	3.8
22878	TRAPPC8	trafficking protein particle complex 8	10	2.8	264	2.6	4
55717	WDR11	WD repeat domain 11	10	-5.1	235	-7.1	-4.5
9632	SEC24C	SEC24 family member C	10	3.1	224	2.7	4.4
4249	MGAT5	mannosyl (alpha-1,6-)-glycoprotein beta-1,6-N-acetyl-glucosaminyltransferase	10	-5.8	223	-8.1	-5.2
2762	GMDS	GDP-mannose 4,6-dehydratase	10	4.8	220	4.5	6.9
2683	B4GALT1	UDP-Gal:betaGlcNAc beta 1,4- galactosyltransferase, polypeptide 1	10	2.4	217	2.2	3.6
10483	SEC23B	Sec23 homolog B (S. cerevisiae)	10	3.4	217	3.1	4.9
23071	ERP44	endoplasmic reticulum protein 44	10	2.7	206	2.4	3.8
51542	VPS54	vacuolar protein sorting 54 homolog (S. cerevisiae)	10	2.5	189	2.3	3.7
400	ARL1	ADP-ribosylation factor-like 1	10	-3.5	183	-5.2	-3.2
10802	SEC24A	SEC24 family member A	10	1.7	174	1.5	2.5
55275	VPS53	vacuolar protein sorting 53 homolog (S. cerevisiae)	10	2.5	170	2.2	3.8
121665	SPPL3	signal peptide peptidase like 3	10	2.6	170	2.3	3.8
7360	UGP2	UDP-glucose pyrophosphorylase 2	10	4	154	3.4	5.8
5885	RAD21	RAD21 homolog (S. pombe)	10	-4.8	154	-7	-4.4
27095	TRAPPC3	trafficking protein particle complex 3	10	2.8	152	2.4	4.1
51430	SUCO	SUN domain containing ossification factor	10	3.7	152	2.7	5.2
169714	QSOX2	quiescin Q6 sulfhydryl oxidase 2	10	3.9	148	2.8	5.6
6185	RPN2	ribophorin II	10	3.4	142	2.9	5.5
5861	RAB1A	RAB1A, member RAS oncogene family	10	3.1	134	2.8	4.8
4247	MGAT2	mannosyl (alpha-1,6-)-glycoprotein beta-1,2-N-acetylglucosaminyltransferase	10	3.9	129	3.5	5.7
56681	SAR1A	secretion associated, Ras related GTPase 1A	10	2.3	124	1.9	3.4
8907	AP1M1	adaptor-related protein complex 1, mu 1 subunit	10	-4.2	121	-6.1	-3.5
6836	SURF4	surfeit 4	9	1.9	119	1.5	2.8
6293	VPS52	vacuolar protein sorting 52 homolog (S. cerevisiae)	10	2.2	118	1.9	3.2
10498	CARM1	coactivator-associated arginine methyltransferase 1	10	2	114	1.6	2.9
10642	IGF2BP1	insulin-like growth factor 2 mRNA binding protein 1	10	1.6	113	1.3	2.4
60559	SPCS3	signal peptidase complex subunit 3 homolog (S. cerevisiae)	19	2.9	112	2.4	4.2
9126	SMC3	structural maintenance of chromosomes 3	8	-4.5	108	-7.2	-3.6
439	ASNA1	arsA arsenite transporter, ATP-binding, homolog 1 (bacterial)	10	3.5	101	2.2	6.5
60684	TRAPPC11	trafficking protein particle complex 11	10	3	96.5	2.3	4.6
25839	COG4	component of oligomeric golgi complex 4	10	-3.2	93.7	-5	-2.8
5862	RAB2A	RAB2A, member RAS oncogene family	10	2	93	1.5	2.9
80018	NAA25	N(alpha)-acetyltransferase 25, NatB auxiliary subunit	10	-3.2	88.6	-4.6	-2.5
4170	MCL1	myeloid cell leukemia 1	10	-2.6	85.6	-3.7	-2
1981	EIF4G1	eukaryotic translation initiation factor 4 gamma, 1	9	1.7	81.5	1.3	2.5
51138	COPS4	COP9 signalosome subunit 4	9	2.5	81.1	2	3.9
6484	ST3GAL4	ST3 beta-galactoside alpha-2,3-sialyltransferase 4	10	-2.4	79.9	-3.4	-1.9
3692	EIF6	eukaryotic translation initiation factor 6	7	-3.6	79.9	-5.9	-3
8570	KHSRP	KH-type splicing regulatory protein	9	1.4	79	1.2	2.3
890	CCNA2	cyclin A2	10	-2.3	74.4	-3.2	-1.8
5591	PRKDC	protein kinase, DNA-activated, catalytic polypeptide	10	-2.6	73	-3.9	-2.2
2800	GOLGA1	golgin A1	10	1.2	70	1	1.8
83548	COG3	component of oligomeric golgi complex 3	9	-3.5	70	-5.5	-2.1
1457	CSNK2A1	casein kinase 2, alpha 1 polypeptide	10	-1.8	70	-2.6	-1.5
375	ARF1	ADP-ribosylation factor 1	10	2.5	68.3	2.1	4.5
3326	HSP90AB1	heat shock protein 90kDa alpha (cytosolic), class B member 1	10	1.5	68.1	1.2	2.3
50999	TMED5	transmembrane emp24 protein transport domain containing 5	10	1.1	66.4	0.8	1.8
23256	SCFD1	sec1 family domain containing 1	10	3	65.9	2.5	5.5
1315	COPB1	coatomer protein complex, subunit beta 1	3	-4.9	64.5	-8.7	-4.4
6240	RRM1	ribonucleotide reductase M1	7	2.6	63.5	2.3	4.6
9777	TM9SF4	transmembrane 9 superfamily protein member 4	10	-1.9	63.3	-2.8	-1.4
126003	TRAPPC5	trafficking protein particle complex 5	10	2.1	62	1.7	3.5
51693	TRAPPC2L	trafficking protein particle complex 2-like	10	2.5	61.9	2	4.4
9554	SEC22B	SEC22 vesicle trafficking protein homolog B (S. cerevisiae) (gene/pseudogene)	8	3.6	61.5	2.9	6.4
26225	ARL5A	ADP-ribosylation factor-like 5A	10	1.3	60.8	1	2
9919	SEC16A	SEC16 homolog A (S. cerevisiae)	10	2.1	60.5	1.5	3.5
27333	GOLIM4	golgi integral membrane protein 4	10	-1.5	57.6	-2.3	-1.2
10427	SEC24B	SEC24 family member B	10	1.3	57.3	1	2.1
221079	ARL5B	ADP-ribosylation factor-like 5B	10	1.2	57.3	1	1.8
9039	UBA3	ubiquitin-like modifier activating enzyme 3	9	2.5	56.8	1.8	4
81876	RAB1B	RAB1B, member RAS oncogene family	9	2.9	56	1.9	4.8
23119	HIC2	hypermethylated in cancer 2	19	2.4	53.4	2	4.4
60481	ELOVL5	ELOVL fatty acid elongase 5	10	3	53	2.2	5.7
124245	ZC3H18	zinc finger CCCH-type containing 18	10	-2.3	52.8	-3.5	-1.8
219988	PATL1	protein associated with topoisomerase II homolog 1 (yeast)	10	-2.7	52.8	-3.9	-1
80218	NAA50	N(alpha)-acetyltransferase 50, NatE catalytic subunit	10	1.9	52.6	1.5	2.9
6634	SNRPD3	small nuclear ribonucleoprotein D3 polypeptide 18kDa	8	3	51.7	2.5	5.6
10142	AKAP9	A kinase (PRKA) anchor protein 9	10	-2.1	51.4	-3.2	-1.6
5688	PSMA7	proteasome (prosome, macropain) subunit, alpha type, 7	10	3.3	51.3	2.7	5.7
10484	SEC23A	Sec23 homolog A (S. cerevisiae)	10	-2.5	51.1	-3.6	-1.4
55015	PRPF39	pre-mRNA processing factor 39	10	-3.3	51	-5.1	-1.5
65264	UBE2Z	ubiquitin-conjugating enzyme E2Z	10	-2.2	50.6	-3.2	-1.7
8675	STX16	syntaxin 16	10	0.9	49.8	0.6	1.4
5426	POLE	polymerase (DNA directed), epsilon, catalytic subunit	10	2.9	48.4	2.6	5
51386	EIF3L	eukaryotic translation initiation factor 3, subunit L	10	-2	48.1	-2.8	-1
63035	BCORL1	BCL6 corepressor-like 1	10	-2.7	48	-4.3	-1.4
3608	ILF2	interleukin enhancer binding factor 2	8	2.2	46.4	1.5	3.9
5694	PSMB6	proteasome (prosome, macropain) subunit, beta type, 6	17	2.7	46	2.4	4.9
9559	VPS26A	vacuolar protein sorting 26 homolog A (S. pombe)	9	-1.7	40.9	-2.6	-1.3
6599	SMARCC1	SWI/SNF related, matrix associated, actin dependent regulator of chromatin, subfamily c, member 1	9	1.1	38.7	0.8	1.7
9276	COPB2	coatomer protein complex, subunit beta 2 (beta prime)	8	2.4	38.7	1.9	4.9
506	ATP5B	ATP synthase, H+ transporting, mitochondrial F1 complex, beta polypeptide	6	3.5	38.6	3	6.6
5707	PSMD1	proteasome (prosome, macropain) 26S subunit, non-ATPase, 1	7	-2.6	38.6	-4.1	-1.2
6124	RPL4	ribosomal protein L4	9	-3.4	35.9	-6.6	-2.8
10291	SF3A1	splicing factor 3a, subunit 1, 120kDa	16	-1.7	35.7	-2.5	-1.3
5770	PTPN1	protein tyrosine phosphatase, non-receptor type 1	10	-1.7	35.1	-2.6	-1.1
51096	UTP18	UTP18 small subunit (SSU) processome component homolog (yeast)	10	2.4	33.9	1.9	4.9
55699	IARS2	isoleucyl-tRNA synthetase 2, mitochondrial	7	3	33.3	2.6	5.8
10146	G3BP1	GTPase activating protein (SH3 domain) binding protein 1	10	-1.1	32.2	-1.8	-0.8
1387	CREBBP	CREB binding protein	10	-1	32.1	-1.7	-0.7
10342	TFG	TRK-fused gene	10	-1.3	31.9	-1.9	-0.8
2804	GOLGB1	golgin B1	10	-3.9	31.3	-8	-1.8
23352	UBR4	ubiquitin protein ligase E3 component n-recognin 4	9	0.9	31	0.6	1.6
5706	PSMC6	proteasome (prosome, macropain) 26S subunit, ATPase, 6	6	-1.9	30.9	-3.6	-1.4
6729	SRP54	signal recognition particle 54kDa	10	1	29.9	0.6	1.6
55610	CCDC132	coiled-coil domain containing 132	10	-1	29.7	-1.7	-0.7
8667	EIF3H	eukaryotic translation initiation factor 3, subunit H	9	-3.5	28.9	-7	5.1
55737	VPS35	vacuolar protein sorting 35 homolog (S. cerevisiae)	8	-1.2	28.4	-1.9	-0.9
1314	COPA	coatomer protein complex, subunit alpha	7	-1.6	27.9	-2.7	-1.2
23212	RRS1	RRS1 ribosome biogenesis regulator homolog (S. cerevisiae)	6	3.1	27.7	2.7	5.9
6160	RPL31	ribosomal protein L31	3	1.5	27.4	1.2	3
6156	RPL30	ribosomal protein L30	7	2.9	27.4	2.5	5
5717	PSMD11	proteasome (prosome, macropain) 26S subunit, non-ATPase, 11	10	-2.1	27.3	-3.3	-1
5708	PSMD2	proteasome (prosome, macropain) 26S subunit, non-ATPase, 2	8	-2	27.2	-3.4	-1.6
9262	STK17B	serine/threonine kinase 17b	10	-3	27.1	-5.9	-2.6
58477	SRPRB	signal recognition particle receptor, B subunit	9	1.2	27.1	0.8	1.9
152559	PAQR3	progestin and adipoQ receptor family member III	10	0.9	27	0.5	1.6
1137	CHRNA4	cholinergic receptor, nicotinic, alpha 4 (neuronal)	10	-2.8	27	-5	-2.4
10992	SF3B2	splicing factor 3b, subunit 2, 145kDa	8	1.5	26.1	1.2	2.9
10492	SYNCRIP	synaptotagmin binding, cytoplasmic RNA interacting protein	10	-0.9	26	-1.5	-0.5
6165	RPL35A	ribosomal protein L35a	8	1.5	25.4	0.9	3
7272	TTK	TTK protein kinase	8	-2.1	25.3	-4	2.6
5868	RAB5A	RAB5A, member RAS oncogene family	10	1.1	25.2	0.8	1.8
285855	RPL7L1	ribosomal protein L7-like 1	10	-1.8	25.1	-2.7	-0.9
7203	CCT3	chaperonin containing TCP1, subunit 3 (gamma)	9	-1.9	24.8	-3.6	-1
55837	EAPP	E2F-associated phosphoprotein	10	-2	24.7	-3.3	-1.5
10036	CHAF1A	chromatin assembly factor 1, subunit A (p150)	10	2.5	24.6	2	5
8664	EIF3D	eukaryotic translation initiation factor 3, subunit D	6	2.3	24.3	1.9	4
9054	NFS1	NFS1 cysteine desulfurase	10	-0.9	24	-3.9	-0.5
10972	TMED10	transmembrane emp24-like trafficking protein 10 (yeast)	9	-0.8	23.9	-1.4	-0.5
3190	HNRNPK	heterogeneous nuclear ribonucleoprotein K	10	1.5	23.8	-2.1	3
51552	RAB14	RAB14, member RAS oncogene family	10	0.6	23.3	0.4	1.3
5518	PPP2R1A	protein phosphatase 2, regulatory subunit A, alpha	20	2.3	23.3	1.8	4
10575	CCT4	chaperonin containing TCP1, subunit 4 (delta)	9	1.5	23.2	0.9	3
23160	WDR43	WD repeat domain 43	7	-1.5	22.6	-2.7	-1
25813	SAMM50	SAMM50 sorting and assembly machinery component	6	2	22.6	1.6	4
4605	MYBL2	v-myb avian myeloblastosis viral oncogene homolog-like 2	9	1.1	22	0.8	1.9
7371	UCK2	uridine-cytidine kinase 2	9	-3.7	21.9	-7	-3.4
4248	MGAT3	mannosyl (beta-1,4-)-glycoprotein beta-1,4-N-acetylglucosaminyltransferase	9	-1.7	21.9	-2.8	-1.1
54808	DYM	dymeclin	9	-1.9	21.4	-3	-0.6
85446	ZFHX2	zinc finger homeobox 2	20	-3.9	20.7	-6.9	-3.5
51575	ESF1	ESF1, nucleolar pre-rRNA processing protein, homolog (S. cerevisiae)	16	2.4	20.7	2	4
5709	PSMD3	proteasome (prosome, macropain) 26S subunit, non-ATPase, 3	8	-1.1	20.2	-1.9	-0.7
27430	MAT2B	methionine adenosyltransferase II, beta	20	-3.2	20.1	-6	-1.2
498	ATP5A1	ATP synthase, H+ transporting, mitochondrial F1 complex, alpha subunit 1, cardiac muscle	20	-2.3	19.6	-3.6	-1.4
6301	SARS	seryl-tRNA synthetase	8	1.4	19.2	0.9	2.8
2091	FBL	fibrillarin	6	-1.9	18.6	-3.7	-1.2
3609	ILF3	interleukin enhancer binding factor 3, 90kDa	10	1.1	18.1	0.8	1.9
4738	NEDD8	neural precursor cell expressed, developmentally down-regulated 8	8	1.3	18	0.9	3
4904	YBX1	Y box binding protein 1	10	1.9	17.9	1.1	3.6
10885	WDR3	WD repeat domain 3	7	-2.4	17.7	-3.9	-2.1
27340	UTP20	UTP20, small subunit (SSU) processome component, homolog (yeast)	9	1.9	17.7	1.2	3.6
643641	ZNF862	zinc finger protein 862	10	1.4	17.5	1	2.9
84548	TMEM185A	transmembrane protein 185A	10	1.5	17.4	1.1	3
51258	MRPL51	mitochondrial ribosomal protein L51	9	1.7	17.1	1.2	3
1660	DHX9	DEAH (Asp-Glu-Ala-His) box helicase 9	10	-1.6	17.1	-2.9	-1.2
372	ARCN1	archain 1	3	1.5	17	-2.5	3
5511	PPP1R8	protein phosphatase 1, regulatory subunit 8	10	1	16.9	0.5	1.7
6154	RPL26	ribosomal protein L26	7	-1.1	16.7	-1.9	-0.6
6194	RPS6	ribosomal protein S6	8	1.5	16	0.9	3
7026	NR2F2	nuclear receptor subfamily 2, group F, member 2	10	0.6	15.5	-3.9	2
3006	HIST1H1C	histone cluster 1, H1c	10	-0.7	15.5	-1.5	-0.3
79029	SPATA5L1	spermatogenesis associated 5-like 1	9	-2.6	15.3	-5	-1.7
64746	ACBD3	acyl-CoA binding domain containing 3	10	0.6	14.9	0.3	1.4
5704	PSMC4	proteasome (prosome, macropain) 26S subunit, ATPase, 4	6	-1.8	14.1	-3	2.3
6129	RPL7	ribosomal protein L7	9	1.9	13.5	-1.3	4
6181	RPLP2	ribosomal protein, large, P2	8	-1.6	13.2	-2.9	-0.9
23760	PITPNB	phosphatidylinositol transfer protein, beta	10	-1.7	12.9	-2.9	-1
7917	BAG6	BCL2-associated athanogene 6	10	1.2	12.7	0.9	2
6230	RPS25	ribosomal protein S25	10	1.1	12.6	0.7	1.9
25879	DCAF13	DDB1 and CUL4 associated factor 13	10	1.8	12.6	1.1	3
84304	NUDT22	nudix (nucleoside diphosphate linked moiety X)-type motif 22	10	-1.6	12.4	-2.9	-1.1
5700	PSMC1	proteasome (prosome, macropain) 26S subunit, ATPase, 1	7	-0.7	12.4	-1.6	-0.3
10541	ANP32B	acidic (leucine-rich) nuclear phosphoprotein 32 family, member B	10	-2.3	11.8	-4	-1.4
25853	DCAF12	DDB1 and CUL4 associated factor 12	10	-0.4	11.8	-1	-0.2
25900	IFFO1	intermediate filament family orphan 1	20	-1.4	11.4	-2	-1
8661	EIF3A	eukaryotic translation initiation factor 3, subunit A	7	-2.1	11.3	-4	-0.7
160	AP2A1	adaptor-related protein complex 2, alpha 1 subunit	10	-2.1	11.3	-4	1.1
1639	DCTN1	dynactin 1	8	-1.6	10.1	-2.7	-0.3
29117	BRD7	bromodomain containing 7	10	-0.8	9.43	-1.8	-0.3
6721	SREBF2	sterol regulatory element binding transcription factor 2	10	0.6	9.41	0.2	1.5
10075	HUWE1	HECT, UBA and WWE domain containing 1, E3 ubiquitin protein ligase	10	0.6	8.75	0.2	1.6
8563	THOC5	THO complex 5	8	1.4	8.61	0.5	3
1056	CEL	carboxyl ester lipase	10	1.3	8.55	-2.4	2
9399	STOML1	stomatin (EPB72)-like 1	10	-2.5	8.28	-5	-1.6
55806	HR	hair growth associated	19	1.4	7.89	0.2	3
203068	TUBB	tubulin, beta class I	16	-0.6	7.86	-1.7	-0.1
10959	TMED2	transmembrane emp24 domain trafficking protein 2	10	-1	7.55	-2	-0.3
1350	COX7C	cytochrome c oxidase subunit VIIc	9	-2.1	7.36	-4	-0.6
58533	SNX6	sorting nexin 6	10	0.4	7.08	0.1	1.5
8665	EIF3F	eukaryotic translation initiation factor 3, subunit F	9	-0.5	7.02	-1.9	0.1
1296	COL8A2	collagen, type VIII, alpha 2	10	0.5	6.78	-0.9	2
23168	RTF1	Rtf1, Paf1/RNA polymerase II complex component, homolog (S. cerevisiae)	6	-2.3	6.55	-4	-1.4
1984	EIF5A	eukaryotic translation initiation factor 5A	9	1.4	6.48	-4.2	3
23277	CLUH	clustered mitochondria (cluA/CLU1) homolog	10	-1.1	6.47	-1.9	-0.2
50807	ASAP1	ArfGAP with SH3 domain, ankyrin repeat and PH domain 1	10	-1.1	6.43	-2	-0.3
23028	KDM1A	lysine (K)-specific demethylase 1A	10	0.9	6.34	0.3	2
8450	CUL4B	cullin 4B	10	0.4	6.06	0	1.7
6449	SGTA	small glutamine-rich tetratricopeptide repeat (TPR)-containing, alpha	10	1.4	5.59	0.3	3
2302	FOXJ1	forkhead box J1	10	0.5	5.42	-0.1	2
6651	SON	SON DNA binding protein	18	-1.1	5.01	-2	1.6
23469	PHF3	PHD finger protein 3	10	-0.6	4.83	-2	0
3201	HOXA4	homeobox A4	10	0.7	4.75	-0.3	2
7415	VCP	valosin containing protein	5	1.2	4.64	-1.8	2
9782	MATR3	matrin 3	10	-0.5	4.58	-2	0
387264	KRTAP5-1	keratin associated protein 5-1	10	1	4.58	-0.9	2
283870	BRICD5	BRICHOS domain containing 5	10	0.7	4.56	-0.5	2
283171	C11ORF44	chromosome 11 open reading frame 44	10	-1.3	4.35	-2	0.4
100129520	LOC100129520	testis expressed sequence 13-like	10	-0.6	4.22	-2	0.1
84283	TMEM79	transmembrane protein 79	10	-1.2	4.03	-2	-0.1
90933	TRIM41	tripartite motif containing 41	10	-0.4	4	-2	0.4
91419	XRCC6BP1	XRCC6 binding protein 1	10	0.4	3.9	-1	1.9
6596	HLTF	helicase-like transcription factor	10	-0.8	3.46	-2	0.4
9465	AKAP7	A kinase (PRKA) anchor protein 7	10	-1	3.34	-2	1.2
440270	GOLGA8B	golgin A8 family, member B	10	-1	3.32	-2	0.4
8295	TRRAP	transformation/transcription domain-associated protein	10	-0.5	3.21	-2	1.2
5031	P2RY6	pyrimidinergic receptor P2Y, G-protein coupled, 6	10	0.6	3.17	-0.4	2
55288	RHOT1	ras homolog family member T1	10	0.5	3.1	-0.7	2
4677	NARS	asparaginyl-tRNA synthetase	8	-0.5	2.93	-2	1.2
10861	SLC26A1	solute carrier family 26 (anion exchanger), member 1	10	-1.3	2.8	-2	1.1
1139	CHRNA7	cholinergic receptor, nicotinic, alpha 7 (neuronal)	10	-0.2	2.76	-1.9	1.2
149699	GTSF1L	gametocyte specific factor 1-like	10	0.7	2.61	-0.7	2
150946	GAREML	GRB2 associated, regulator of MAPK1-like	20	-0.8	2.33	-2	1.4
5867	RAB4A	RAB4A, member RAS oncogene family	10	0.2	2.22	-0.9	2
79979	TRMT2B	tRNA methyltransferase 2 homolog B (S. cerevisiae)	10	-0.8	2.09	-2	0.7
8694	DGAT1	diacylglycerol O-acyltransferase 1	10	0.9	1.99	-1	2
29882	ANAPC2	anaphase promoting complex subunit 2	8	0.5	1.95	-1.4	2
139324	HDX	highly divergent homeobox	10	0.6	1.84	-1	2
118670	FAM24A	family with sequence similarity 24, member A	10	-0.5	1.82	-2	1
81493	SYNC	syncoilin, intermediate filament protein	10	-0.6	1.79	-2	1
3141	HLCS	holocarboxylase synthetase (biotin-(proprionyl-CoA-carboxylase (ATP-hydrolysing)) ligase)	19	-0.2	1.77	-1.7	1.1
196415	C12ORF77	chromosome 12 open reading frame 77	10	-1.1	1.7	-2	0.6
56850	GRIPAP1	GRIP1 associated protein 1	10	0.2	1.61	-1.6	1.8
79822	ARHGAP28	Rho GTPase activating protein 28	10	-1.7	1.5	-3	0.9
27439	CECR6	cat eye syndrome chromosome region, candidate 6	10	-0.3	1.5	-2	1.2
9706	ULK2	unc-51 like autophagy activating kinase 2	10	0.2	1.48	-1.6	1.7
6155	RPL27	ribosomal protein L27	7	-0.3	1.44	-2	1.4
11224	RPL35	ribosomal protein L35	9	-0.3	1.44	-2	1.3
64283	ARHGEF28	Rho guanine nucleotide exchange factor (GEF) 28	10	-0.2	1.4	-2	1.3
8943	AP3D1	adaptor-related protein complex 3, delta 1 subunit	10	0.2	1.31	-1.3	2
8989	TRPA1	transient receptor potential cation channel, subfamily A, member 1	10	-0.3	1.31	-2	0.9
140032	RPS4Y2	ribosomal protein S4, Y-linked 2	10	-0.2	1.28	-2	0.9
10290	SPEG	SPEG complex locus	20	-0.3	1.27	-2	0.7
LOC100289187	LOC100289187	N/A	10	-0.3	1.16	-2	1.2
23163	GGA3	golgi-associated, gamma adaptin ear containing, ARF binding protein 3	10	-1.2	1.16	-2	1.2
2134	EXTL1	exostosin-like glycosyltransferase 1	10	0.2	1.12	-1.1	2
8412	BCAR3	breast cancer anti-estrogen resistance 3	20	-0.4	1.08	-1.9	0.6
727940	RHOXF2B	Rhox homeobox family, member 2B	10	0.2	1.06	-1.2	2
8653	DDX3Y	DEAD (Asp-Glu-Ala-Asp) box helicase 3, Y-linked	10	0.3	1.05	-1.3	2
869	CBLN1	cerebellin 1 precursor	10	0.2	1.01	-1.3	2
646960	PRSS56	protease, serine, 56	10	0.6	0.961	-1.1	2
112609	MRAP2	melanocortin 2 receptor accessory protein 2	10	0.2	0.922	-1.1	2
6571	SLC18A2	solute carrier family 18 (vesicular monoamine transporter), member 2	9	-0.5	0.89	-2	1.2
22930	RAB3GAP1	RAB3 GTPase activating protein subunit 1 (catalytic)	10	0.2	0.835	-1.1	2
4897	NRCAM	neuronal cell adhesion molecule	10	-0.2	0.823	-2	1.3
353324	SPATA12	spermatogenesis associated 12	10	0.2	0.723	-1.8	1.6
5757	PTMA	prothymosin, alpha	10	-0.2	0.595	-2	1.3
51177	PLEKHO1	pleckstrin homology domain containing, family O member 1	10	-0.2	0.546	-2	1.4
79690	GAL3ST4	galactose-3-O-sulfotransferase 4	20	0.1	0.517	-0.6	2
56124	PCDHB12	protocadherin beta 12	10	-0.1	0.498	-2	1.4
51566	ARMCX3	armadillo repeat containing, X-linked 3	10	-0.1	0.343	-2	1.5
255488	RNF144B	ring finger protein 144B	10	-0.1	0.342	-2	1.5
55163	PNPO	pyridoxamine 5'-phosphate oxidase	10	0.1	0.317	-2	1.3
221091	LRRN4CL	LRRN4 C-terminal like	10	0.1	0.307	-1.4	2
25818	KLK5	kallikrein-related peptidase 5	10	0.1	0.292	-1.4	2
51495	PTPLAD1	protein tyrosine phosphatase-like A domain containing 1	10	-0.1	0.28	-2	1.4
259282	BOD1L1	biorientation of chromosomes in cell division 1-like 1	20	-0.5	0.251	-2	0.8
642517	AGAP9	ArfGAP with GTPase domain, ankyrin repeat and PH domain 9	10	0.1	0.17	-1.6	1.9
116541	MRPL54	mitochondrial ribosomal protein L54	10	0.5	0.158	-1.3	2
166614	DCLK2	doublecortin-like kinase 2	10	-0.2	0.143	-2	1.4
59272	ACE2	angiotensin I converting enzyme 2	10	-0.1	0.121	-2	1.5
64224	HERPUD2	HERPUD family member 2	10	-0.1	0.103	-1.8	1.7
64130	LIN7B	lin-7 homolog B (C. elegans)	10	0.1	0.0933	-2	1.4
361	AQP4	aquaporin 4	10	-0.1	0.0926	-2	1.5
2939	GSTA2	glutathione S-transferase alpha 2	10	0.1	0.0656	-1.5	2
23341	DNAJC16	DnaJ (Hsp40) homolog, subfamily C, member 16	10	0.1	0.0485	-1.6	1.9
23526	HMHA1	histocompatibility (minor) HA-1	10	-0.1	0.0425	-1.7	1.8
6996	TDG	thymine-DNA glycosylase	10	0.1	0.0209	-1.5	2
89866	SEC16B	SEC16 homolog B (S. cerevisiae)	10	-0.1	0.0177	-2	1.5
55244	SLC47A1	solute carrier family 47 (multidrug and toxin extrusion), member 1	10	0	0	-1.5	2
84189	SLITRK6	SLIT and NTRK-like family, member 6	10	0	0	-1.9	1.7
147199	SCGB1C1	secretoglobin, family 1C, member 1	10	0	0	-1.6	2
6399	TRAPPC2	trafficking protein particle complex 2	10	0	0	-1.5	2
55504	TNFRSF19	tumor necrosis factor receptor superfamily, member 19	20	0	0	-0.8	2
100132146	LOC100132146	uncharacterized LOC100132146	10	0	0	-1.9	1.7
57661	PHRF1	PHD and ring finger domains 1	10	0	0	-1.8	1.7
8647	ABCB11	ATP-binding cassette, sub-family B (MDR/TAP), member 11	10	0	0	-2	1.5
9457	FHL5	four and a half LIM domains 5	10	0	0	-1.7	1.9
386682	KRTAP10-3	keratin associated protein 10-3	10	0	0	-1.6	1.9
3320	HSP90AA1	heat shock protein 90kDa alpha (cytosolic), class A member 1	10	0	0	-1.5	2
279	AMY2A	amylase, alpha 2A (pancreatic)	10	0	0	-2	1.5
84720	PIGO	phosphatidylinositol glycan anchor biosynthesis, class O	10	0	0	-2	1.5
10297	APC2	adenomatosis polyposis coli 2	19	0	0	-0.7	2
338328	GPIHBP1	glycosylphosphatidylinositol anchored high density lipoprotein binding protein 1	10	0	0	-1.5	2
285605	DTWD2	DTW domain containing 2	10	0	0	-1.5	2

## Sheet: Unt vs Retro combo
#GeneID	Symbol	GeneInfo	Combo casTLE Effect	Combo casTLE Score	Minimum Effect Estimate	Maximum Effect Estimate
22878	TRAPPC8	trafficking protein particle complex 8	-3.5	277	-4.2	-3.1
439	ASNA1	arsA arsenite transporter, ATP-binding, homolog 1 (bacterial)	-2.2	256	-2.7	-2
51552	RAB14	RAB14, member RAS oncogene family	-1.4	245	-1.8	-1.3
9554	SEC22B	SEC22 vesicle trafficking protein homolog B (S. cerevisiae) (gene/pseudogene)	-3.3	237	-4.2	-3
51542	VPS54	vacuolar protein sorting 54 homolog (S. cerevisiae)	-2.5	189	-3.1	-2.2
64746	ACBD3	acyl-CoA binding domain containing 3	-1.4	186	-1.7	-1.1
55275	VPS53	vacuolar protein sorting 53 homolog (S. cerevisiae)	-1.7	174	-2.2	-1.4
6729	SRP54	signal recognition particle 54kDa	-1.1	161	-1.3	-0.8
23256	SCFD1	sec1 family domain containing 1	-2.5	158	-3.4	-2.2
60684	TRAPPC11	trafficking protein particle complex 11	-2.3	141	-2.8	-1.4
1981	EIF4G1	eukaryotic translation initiation factor 4 gamma, 1	1.8	132	1.2	2.4
9632	SEC24C	SEC24 family member C	-1.5	131	-2	-1.3
9777	TM9SF4	transmembrane 9 superfamily protein member 4	-1.2	128	-1.5	-1
55737	VPS35	vacuolar protein sorting 35 homolog (S. cerevisiae)	1.1	122	0.9	1.5
6194	RPS6	ribosomal protein S6	3.3	119	2.9	5.2
5688	PSMA7	proteasome (prosome, macropain) subunit, alpha type, 7	3	115	2.4	4.6
83548	COG3	component of oligomeric golgi complex 3	-3.8	112	-5.5	-3.4
27095	TRAPPC3	trafficking protein particle complex 3	-2.8	111	-4	-2
27340	UTP20	UTP20, small subunit (SSU) processome component, homolog (yeast)	-2.1	109	-3	-1.8
5717	PSMD11	proteasome (prosome, macropain) 26S subunit, non-ATPase, 11	-2.4	108	-3.5	-2
10036	CHAF1A	chromatin assembly factor 1, subunit A (p150)	2.6	108	2.2	4
3190	HNRNPK	heterogeneous nuclear ribonucleoprotein K	1.5	107	1.1	2.2
5862	RAB2A	RAB2A, member RAS oncogene family	-0.9	106	-1.4	-0.8
5770	PTPN1	protein tyrosine phosphatase, non-receptor type 1	1	105	0.7	1.3
4738	NEDD8	neural precursor cell expressed, developmentally down-regulated 8	-1.9	104	-2.8	-1.6
8667	EIF3H	eukaryotic translation initiation factor 3, subunit H	-1.6	99.5	-2.3	-1.3
23212	RRS1	RRS1 ribosome biogenesis regulator homolog (S. cerevisiae)	-1.7	99	-2.7	-1.5
8664	EIF3D	eukaryotic translation initiation factor 3, subunit D	1.5	98.5	1.3	2.5
6160	RPL31	ribosomal protein L31	2.9	98.2	2.5	4.6
400	ARL1	ADP-ribosylation factor-like 1	-1.9	95.6	-2.8	-1.5
5706	PSMC6	proteasome (prosome, macropain) 26S subunit, ATPase, 6	-2.3	95.3	-4	1.5
6301	SARS	seryl-tRNA synthetase	1.4	94.7	1.1	2.2
10992	SF3B2	splicing factor 3b, subunit 2, 145kDa	2.4	94.1	1.9	3.8
25813	SAMM50	SAMM50 sorting and assembly machinery component	1.6	93.1	1.4	2.7
6634	SNRPD3	small nuclear ribonucleoprotein D3 polypeptide 18kDa	1.8	92.8	1.3	2.7
23352	UBR4	ubiquitin protein ligase E3 component n-recognin 4	-0.8	89.5	-2	-0.8
2091	FBL	fibrillarin	-2.1	84.8	-3	-1.7
203068	TUBB	tubulin, beta class I	2.6	84.5	2	4.1
7415	VCP	valosin containing protein	2.4	84.5	1.9	3.7
5518	PPP2R1A	protein phosphatase 2, regulatory subunit A, alpha	-1.8	82.3	-2.5	-1.3
10575	CCT4	chaperonin containing TCP1, subunit 4 (delta)	-2.4	80.8	-3.8	-2
7917	BAG6	BCL2-associated athanogene 6	2.1	79.2	1.7	3
5694	PSMB6	proteasome (prosome, macropain) subunit, beta type, 6	2	78	1.7	3.5
4605	MYBL2	v-myb avian myeloblastosis viral oncogene homolog-like 2	-2.2	77.5	-3.5	-1.9
5704	PSMC4	proteasome (prosome, macropain) 26S subunit, ATPase, 4	1.6	74.7	1.4	2.6
10291	SF3A1	splicing factor 3a, subunit 1, 120kDa	-2.1	73.6	-3.5	-1.8
80018	NAA25	N(alpha)-acetyltransferase 25, NatB auxiliary subunit	1.4	70.1	1.2	2.4
51575	ESF1	ESF1, nucleolar pre-rRNA processing protein, homolog (S. cerevisiae)	2.3	69.3	1.7	3.4
6124	RPL4	ribosomal protein L4	1.3	68.5	-1.6	2
51138	COPS4	COP9 signalosome subunit 4	1.5	64.5	1.2	2.5
6240	RRM1	ribonucleotide reductase M1	-2.8	64.4	-4.9	-2.4
1350	COX7C	cytochrome c oxidase subunit VIIc	-1	60.8	-2.4	-0.9
5426	POLE	polymerase (DNA directed), epsilon, catalytic subunit	-1.6	60	-2.8	-1.3
55699	IARS2	isoleucyl-tRNA synthetase 2, mitochondrial	-1.4	59.3	-1.9	-1.1
6836	SURF4	surfeit 4	-0.9	59	-1.2	-0.7
7203	CCT3	chaperonin containing TCP1, subunit 3 (gamma)	-2.9	58.7	-5	2.7
23028	KDM1A	lysine (K)-specific demethylase 1A	1.5	58	1	2.4
285855	RPL7L1	ribosomal protein L7-like 1	-2	57.3	-3.5	-1.7
5707	PSMD1	proteasome (prosome, macropain) 26S subunit, non-ATPase, 1	2	57.3	1.5	3.7
79029	SPATA5L1	spermatogenesis associated 5-like 1	-3.4	57.2	-5.6	-2.9
506	ATP5B	ATP synthase, H+ transporting, mitochondrial F1 complex, beta polypeptide	-2.5	56.8	-4.3	-2.1
8295	TRRAP	transformation/transcription domain-associated protein	1.2	56.6	0.9	1.8
80218	NAA50	N(alpha)-acetyltransferase 50, NatE catalytic subunit	1.2	54.9	0.9	1.9
1315	COPB1	coatomer protein complex, subunit beta 1	2	54.6	1.6	3.7
5709	PSMD3	proteasome (prosome, macropain) 26S subunit, non-ATPase, 3	1.6	54.3	1.1	2.7
51430	SUCO	SUN domain containing ossification factor	-0.7	53.8	-1	-0.5
51258	MRPL51	mitochondrial ribosomal protein L51	-2.1	53	-4	-1.7
6156	RPL30	ribosomal protein L30	-1.7	52.8	-2.8	-1.3
6651	SON	SON DNA binding protein	-2.7	52.6	-4.9	-2.3
23168	RTF1	Rtf1, Paf1/RNA polymerase II complex component, homolog (S. cerevisiae)	1.9	52.2	1.4	3.6
3608	ILF2	interleukin enhancer binding factor 2	-1.3	52.2	-2	5.4
6293	VPS52	vacuolar protein sorting 52 homolog (S. cerevisiae)	-1.7	51.4	-2.8	-1.4
5700	PSMC1	proteasome (prosome, macropain) 26S subunit, ATPase, 1	-1.6	49.9	-2.7	-1.2
25879	DCAF13	DDB1 and CUL4 associated factor 13	-2.5	49.2	-4.5	-2.1
23160	WDR43	WD repeat domain 43	1.6	48.8	1.3	2.5
7272	TTK	TTK protein kinase	-1.7	48.8	-2.9	-0.9
126003	TRAPPC5	trafficking protein particle complex 5	-1.2	47.8	-1.7	-0.8
1314	COPA	coatomer protein complex, subunit alpha	-2.5	46.9	-5	1.4
6165	RPL35A	ribosomal protein L35a	2.8	44.1	2.3	4.1
8563	THOC5	THO complex 5	1.2	43.9	1.1	2
58477	SRPRB	signal recognition particle receptor, B subunit	0.8	43.9	0.6	1.5
55015	PRPF39	pre-mRNA processing factor 39	1.3	43.4	0.5	2
160	AP2A1	adaptor-related protein complex 2, alpha 1 subunit	-0.4	43.2	-3.7	-0.2
8661	EIF3A	eukaryotic translation initiation factor 3, subunit A	-1.2	42.4	-1.9	-0.9
9039	UBA3	ubiquitin-like modifier activating enzyme 3	1.1	41.9	0.7	1.9
6599	SMARCC1	SWI/SNF related, matrix associated, actin dependent regulator of chromatin, subfamily c, member 1	0.6	41.4	0.4	0.9
498	ATP5A1	ATP synthase, H+ transporting, mitochondrial F1 complex, alpha subunit 1, cardiac muscle	-0.8	41.1	-1.1	-0.6
5511	PPP1R8	protein phosphatase 1, regulatory subunit 8	-2.8	40.7	-5	-2.1
9559	VPS26A	vacuolar protein sorting 26 homolog A (S. pombe)	1.8	39.8	0.5	3
25839	COG4	component of oligomeric golgi complex 4	-1.1	39.7	-1.6	-0.8
9054	NFS1	NFS1 cysteine desulfurase	-2.4	39	-3.8	-2
6129	RPL7	ribosomal protein L7	0.7	37.4	0.4	1
10075	HUWE1	HECT, UBA and WWE domain containing 1, E3 ubiquitin protein ligase	0.5	37.2	0.4	0.8
6449	SGTA	small glutamine-rich tetratricopeptide repeat (TPR)-containing, alpha	0.5	37	0.4	0.7
6181	RPLP2	ribosomal protein, large, P2	0.9	36.8	0.6	1.5
9276	COPB2	coatomer protein complex, subunit beta 2 (beta prime)	-1.4	34.3	-2	1.5
3692	EIF6	eukaryotic translation initiation factor 6	-2.4	29.8	-4	1.5
29882	ANAPC2	anaphase promoting complex subunit 2	1	29.6	0.7	1.9
60559	SPCS3	signal peptidase complex subunit 3 homolog (S. cerevisiae)	1.9	29.6	1.4	3.4
1639	DCTN1	dynactin 1	-0.8	29.5	-2	1.3
10484	SEC23A	Sec23 homolog A (S. cerevisiae)	2.1	28.9	1.8	3.9
7026	NR2F2	nuclear receptor subfamily 2, group F, member 2	-1.4	28.2	-2	-1.1
6155	RPL27	ribosomal protein L27	-1.4	28.2	-2	-1.2
372	ARCN1	archain 1	0.9	27.9	-4.6	2
6721	SREBF2	sterol regulatory element binding transcription factor 2	-1.2	26.7	-2	-0.9
10297	APC2	adenomatosis polyposis coli 2	2.3	26.3	2.1	4
11224	RPL35	ribosomal protein L35	0.8	25.2	0.5	1.5
9919	SEC16A	SEC16 homolog A (S. cerevisiae)	-1.2	25	-2	-0.3
10885	WDR3	WD repeat domain 3	0.8	22.8	-0.7	2
7371	UCK2	uridine-cytidine kinase 2	-1.7	22.5	-3	-1.4
7360	UGP2	UDP-glucose pyrophosphorylase 2	-0.2	22.2	-1.5	-0.2
8665	EIF3F	eukaryotic translation initiation factor 3, subunit F	-2.8	21.4	-4.9	-2.5
219988	PATL1	protein associated with topoisomerase II homolog 1 (yeast)	0.6	20.8	0.3	0.9
116541	MRPL54	mitochondrial ribosomal protein L54	1.5	20.5	1.2	3
9126	SMC3	structural maintenance of chromosomes 3	2	20	1.3	4
387264	KRTAP5-1	keratin associated protein 5-1	-1.7	19.3	-3	-1.4
81876	RAB1B	RAB1B, member RAS oncogene family	-0.6	19.1	-1.2	-0.4
9262	STK17B	serine/threonine kinase 17b	1.9	18.9	0.4	3
121665	SPPL3	signal peptide peptidase like 3	-0.5	17.8	-1	-0.3
5885	RAD21	RAD21 homolog (S. pombe)	-1	17.5	-2	0.8
65264	UBE2Z	ubiquitin-conjugating enzyme E2Z	-3.2	17.4	-5.9	-2.9
2800	GOLGA1	golgin A1	-0.4	17.3	-0.8	-0.2
646960	PRSS56	protease, serine, 56	0.8	17.1	0.2	1.5
4677	NARS	asparaginyl-tRNA synthetase	0.6	17	0.3	1.7
22930	RAB3GAP1	RAB3 GTPase activating protein subunit 1 (catalytic)	-0.5	16.7	-1	-0.3
5708	PSMD2	proteasome (prosome, macropain) 26S subunit, non-ATPase, 2	2.2	16.2	1.9	4
10342	TFG	TRK-fused gene	0.2	15.9	-1.1	4.7
259282	BOD1L1	biorientation of chromosomes in cell division 1-like 1	-3.6	15	-6.9	-3.3
51096	UTP18	UTP18 small subunit (SSU) processome component homolog (yeast)	1.3	14.5	0.7	2
11196	SEC23IP	SEC23 interacting protein	-0.5	14.3	-0.9	-0.2
85446	ZFHX2	zinc finger homeobox 2	3.4	14	3.2	5.9
5591	PRKDC	protein kinase, DNA-activated, catalytic polypeptide	0.4	13.5	0.2	0.8
6185	RPN2	ribophorin II	0.4	13.4	0.2	0.7
1984	EIF5A	eukaryotic translation initiation factor 5A	0.6	13.1	0.2	1.5
5861	RAB1A	RAB1A, member RAS oncogene family	-0.4	12.8	-1.4	-0.2
10959	TMED2	transmembrane emp24 domain trafficking protein 2	-0.3	12.6	-0.7	-0.2
51386	EIF3L	eukaryotic translation initiation factor 3, subunit L	0.8	12.1	0.2	1.6
169714	QSOX2	quiescin Q6 sulfhydryl oxidase 2	-0.6	11.5	-1.3	-0.2
152559	PAQR3	progestin and adipoQ receptor family member III	0.4	11.3	0.2	1.5
10427	SEC24B	SEC24 family member B	-0.4	11.2	-0.9	-0.2
51693	TRAPPC2L	trafficking protein particle complex 2-like	-0.7	11.1	-1.6	-0.3
1660	DHX9	DEAH (Asp-Glu-Ala-His) box helicase 9	-0.9	10.9	-2	0.4
56681	SAR1A	secretion associated, Ras related GTPase 1A	-0.3	10.7	-0.6	-0.1
1387	CREBBP	CREB binding protein	-0.3	10.2	-1	-0.1
89866	SEC16B	SEC16 homolog B (S. cerevisiae)	-0.8	9.72	-1.9	-0.5
10802	SEC24A	SEC24 family member A	-0.3	9.63	-0.6	-0.1
1137	CHRNA4	cholinergic receptor, nicotinic, alpha 4 (neuronal)	-0.9	9.46	-1.8	-0.5
10972	TMED10	transmembrane emp24-like trafficking protein 10 (yeast)	-0.4	9.4	-0.9	-0.1
5868	RAB5A	RAB5A, member RAS oncogene family	-0.4	9.11	-1	-0.1
8675	STX16	syntaxin 16	-0.3	8.89	-0.7	-0.1
55288	RHOT1	ras homolog family member T1	-0.8	8.4	-2	-0.4
1457	CSNK2A1	casein kinase 2, alpha 1 polypeptide	-0.3	8.09	-0.6	-0.1
58533	SNX6	sorting nexin 6	0.3	8.06	0	1.1
5757	PTMA	prothymosin, alpha	0.3	7.44	0.1	1.3
54808	DYM	dymeclin	-0.3	7.27	-0.8	-0.1
8570	KHSRP	KH-type splicing regulatory protein	0.7	7.14	0.4	2
84304	NUDT22	nudix (nucleoside diphosphate linked moiety X)-type motif 22	-1	6.82	-2	0.4
6154	RPL26	ribosomal protein L26	0.3	6.55	-1.5	1.4
255488	RNF144B	ring finger protein 144B	-0.3	6.49	-0.9	0.1
890	CCNA2	cyclin A2	-0.9	6.37	-2	0.6
10498	CARM1	coactivator-associated arginine methyltransferase 1	-0.3	5.53	-0.9	1.8
8907	AP1M1	adaptor-related protein complex 1, mu 1 subunit	0.2	5.39	-0.1	0.9
23163	GGA3	golgi-associated, gamma adaptin ear containing, ARF binding protein 3	-0.4	5.22	-1.4	0.2
51566	ARMCX3	armadillo repeat containing, X-linked 3	0.2	5.17	-0.2	0.9
283171	C11ORF44	chromosome 11 open reading frame 44	0.5	4.64	-1.5	1.8
10483	SEC23B	Sec23 homolog B (S. cerevisiae)	-0.2	4.61	-1.3	0.8
150946	GAREML	GRB2 associated, regulator of MAPK1-like	0.4	4.56	-0.5	0.9
51495	PTPLAD1	protein tyrosine phosphatase-like A domain containing 1	0.3	4.5	-0.4	1.2
9782	MATR3	matrin 3	-0.3	4.48	-1.3	0.2
81493	SYNC	syncoilin, intermediate filament protein	-1.5	4.46	-3	-0.4
10541	ANP32B	acidic (leucine-rich) nuclear phosphoprotein 32 family, member B	0.2	4.14	-1.9	0.7
285605	DTWD2	DTW domain containing 2	-0.2	4.01	-1.1	0.2
79822	ARHGAP28	Rho GTPase activating protein 28	0.2	3.97	-0.2	1.2
3609	ILF3	interleukin enhancer binding factor 3, 90kDa	-0.6	3.96	-1.8	0
60481	ELOVL5	ELOVL fatty acid elongase 5	-0.4	3.82	-1.5	0.8
55837	EAPP	E2F-associated phosphoprotein	0.3	3.79	-0.1	1.4
8694	DGAT1	diacylglycerol O-acyltransferase 1	0.2	3.62	-0.6	1.4
84720	PIGO	phosphatidylinositol glycan anchor biosynthesis, class O	-0.4	3.51	-1.5	0.5
6399	TRAPPC2	trafficking protein particle complex 2	-0.2	3.45	-1.3	0.2
23277	CLUH	clustered mitochondria (cluA/CLU1) homolog	-0.3	3.42	-1.5	0.2
27439	CECR6	cat eye syndrome chromosome region, candidate 6	-0.2	3.39	-1.5	0.4
91419	XRCC6BP1	XRCC6 binding protein 1	0.5	3.39	-0.2	1.7
23760	PITPNB	phosphatidylinositol transfer protein, beta	0.2	3.37	-0.1	2
23469	PHF3	PHD finger protein 3	-0.2	3.23	-1.5	0.2
4170	MCL1	myeloid cell leukemia 1	-0.2	3.22	-1.2	0.5
25900	IFFO1	intermediate filament family orphan 1	-0.2	3.08	-0.9	1.5
3141	HLCS	holocarboxylase synthetase (biotin-(proprionyl-CoA-carboxylase (ATP-hydrolysing)) ligase)	-0.2	3.08	-1.3	0.4
6596	HLTF	helicase-like transcription factor	0.4	2.91	-0.3	1.6
57661	PHRF1	PHD and ring finger domains 1	-0.3	2.87	-1.1	1.4
124245	ZC3H18	zinc finger CCCH-type containing 18	0.2	2.84	-1.2	1
9399	STOML1	stomatin (EPB72)-like 1	0.2	2.82	-0.8	1.3
3326	HSP90AB1	heat shock protein 90kDa alpha (cytosolic), class B member 1	0.2	2.77	-0.9	1.2
1056	CEL	carboxyl ester lipase	1.3	2.73	-0.2	2
6230	RPS25	ribosomal protein S25	0.3	2.7	-0.7	1.5
643641	ZNF862	zinc finger protein 862	0.2	2.7	-0.7	1.3
23071	ERP44	endoplasmic reticulum protein 44	-0.2	2.65	-1.4	0.3
2804	GOLGB1	golgin B1	-0.2	2.44	-1.5	0.3
23526	HMHA1	histocompatibility (minor) HA-1	-0.3	2.05	-1.6	0.6
25853	DCAF12	DDB1 and CUL4 associated factor 12	-0.3	1.98	-1.5	0.7
8943	AP3D1	adaptor-related protein complex 3, delta 1 subunit	-0.3	1.8	-1.6	0.6
10642	IGF2BP1	insulin-like growth factor 2 mRNA binding protein 1	0.2	1.72	-0.7	1.6
90933	TRIM41	tripartite motif containing 41	-0.1	1.66	-1.6	0.8
84548	TMEM185A	transmembrane protein 185A	-0.2	1.63	-1.5	0.8
26225	ARL5A	ADP-ribosylation factor-like 5A	-0.1	1.63	-1.5	0.9
2683	B4GALT1	UDP-Gal:betaGlcNAc beta 1,4- galactosyltransferase, polypeptide 1	0.2	1.62	-0.7	1.6
140032	RPS4Y2	ribosomal protein S4, Y-linked 2	-0.1	1.55	-1.5	0.9
5031	P2RY6	pyrimidinergic receptor P2Y, G-protein coupled, 6	0.1	1.48	-0.5	1.7
3320	HSP90AA1	heat shock protein 90kDa alpha (cytosolic), class A member 1	-0.2	1.44	-1.6	0.7
869	CBLN1	cerebellin 1 precursor	0.2	1.43	-1	1.4
4904	YBX1	Y box binding protein 1	-0.3	1.41	-1.8	0.5
4897	NRCAM	neuronal cell adhesion molecule	0.2	1.4	-0.8	1.5
2134	EXTL1	exostosin-like glycosyltransferase 1	-0.2	1.34	-1.5	0.8
55244	SLC47A1	solute carrier family 47 (multidrug and toxin extrusion), member 1	-0.2	1.28	-1.6	0.8
375	ARF1	ADP-ribosylation factor 1	0.1	1.24	-0.5	1.9
139324	HDX	highly divergent homeobox	0.1	1.22	-1.1	1.5
166614	DCLK2	doublecortin-like kinase 2	-0.8	1.21	-2	0.1
9706	ULK2	unc-51 like autophagy activating kinase 2	0.1	1.2	-1.3	1.4
283870	BRICD5	BRICHOS domain containing 5	0.2	1.17	-0.6	1.7
149699	GTSF1L	gametocyte specific factor 1-like	0.1	1.16	-0.8	1.8
23119	HIC2	hypermethylated in cancer 2	-0.1	0.998	-0.9	0.8
4248	MGAT3	mannosyl (beta-1,4-)-glycoprotein beta-1,4-N-acetylglucosaminyltransferase	0.1	0.98	-1.1	1.7
279	AMY2A	amylase, alpha 2A (pancreatic)	0.1	0.964	-0.9	1.8
56850	GRIPAP1	GRIP1 associated protein 1	0.1	0.912	-1.4	1.3
8450	CUL4B	cullin 4B	0.1	0.899	-1	1.6
2762	GMDS	GDP-mannose 4,6-dehydratase	-0.2	0.896	-1.2	1.5
221079	ARL5B	ADP-ribosylation factor-like 5B	0.1	0.867	-0.5	2
221091	LRRN4CL	LRRN4 C-terminal like	0.1	0.78	-0.9	1.9
147199	SCGB1C1	secretoglobin, family 1C, member 1	0.3	0.749	-1.3	1.4
5867	RAB4A	RAB4A, member RAS oncogene family	0.1	0.696	-1	1.7
LOC100289187	LOC100289187	N/A	-0.1	0.599	-1.5	1.4
50999	TMED5	transmembrane emp24 protein transport domain containing 5	-0.1	0.573	-1.3	1.6
100129520	LOC100129520	testis expressed sequence 13-like	0.1	0.545	-1.5	1.3
6996	TDG	thymine-DNA glycosylase	-0.1	0.537	-1.6	1.3
8412	BCAR3	breast cancer anti-estrogen resistance 3	0.1	0.497	-0.7	0.9
2302	FOXJ1	forkhead box J1	0.2	0.485	-0.7	1.8
8653	DDX3Y	DEAD (Asp-Glu-Ala-Asp) box helicase 3, Y-linked	0.1	0.443	-1	1.7
10146	G3BP1	GTPase activating protein (SH3 domain) binding protein 1	0.2	0.439	-1.1	1.6
55163	PNPO	pyridoxamine 5'-phosphate oxidase	0.1	0.425	-1.3	1.5
10142	AKAP9	A kinase (PRKA) anchor protein 9	-0.1	0.395	-0.9	2
8989	TRPA1	transient receptor potential cation channel, subfamily A, member 1	-0.1	0.373	-1.5	1.2
63035	BCORL1	BCL6 corepressor-like 1	0.1	0.362	-1.2	1.6
3006	HIST1H1C	histone cluster 1, H1c	0.1	0.332	-1.2	1.7
4247	MGAT2	mannosyl (alpha-1,6-)-glycoprotein beta-1,2-N-acetylglucosaminyltransferase	0.1	0.33	-1.1	1.7
84283	TMEM79	transmembrane protein 79	0.1	0.287	-1	1.7
27430	MAT2B	methionine adenosyltransferase II, beta	0.1	0.235	-0.8	1
9465	AKAP7	A kinase (PRKA) anchor protein 7	0.1	0.223	-1.6	1
100132146	LOC100132146	uncharacterized LOC100132146	-0.1	0.192	-1.7	1.3
118670	FAM24A	family with sequence similarity 24, member A	0.1	0.184	-0.9	1.8
79979	TRMT2B	tRNA methyltransferase 2 homolog B (S. cerevisiae)	-0.1	0.179	-1.3	1.6
27333	GOLIM4	golgi integral membrane protein 4	0.4	0.159	-0.7	1.9
55504	TNFRSF19	tumor necrosis factor receptor superfamily, member 19	0.1	0.146	-0.5	1.1
9457	FHL5	four and a half LIM domains 5	-0.1	0.0922	-1.9	0.9
29117	BRD7	bromodomain containing 7	-0.1	0.0774	-1.2	1.6
353324	SPATA12	spermatogenesis associated 12	-0.1	0.064	-1.7	1.1
55717	WDR11	WD repeat domain 11	0.1	0.00893	-1.3	1.5
6484	ST3GAL4	ST3 beta-galactoside alpha-2,3-sialyltransferase 4	-0.2	0.00465	-4.4	2
64130	LIN7B	lin-7 homolog B (C. elegans)	-0.1	0.00264	-1.7	1.2
10492	SYNCRIP	synaptotagmin binding, cytoplasmic RNA interacting protein	-0.1	0.00239	-1.4	1.5
2939	GSTA2	glutathione S-transferase alpha 2	0	0	-1.5	1.6
642517	AGAP9	ArfGAP with GTPase domain, ankyrin repeat and PH domain 9	0	0	-1.5	1.6
84189	SLITRK6	SLIT and NTRK-like family, member 6	0	0	-0.9	1.9
361	AQP4	aquaporin 4	0	0	-1.6	1.4
25818	KLK5	kallikrein-related peptidase 5	0	0	-1.6	1.5
10290	SPEG	SPEG complex locus	0	0	-1	1
440270	GOLGA8B	golgin A8 family, member B	0	0	-1.2	1.7
196415	C12ORF77	chromosome 12 open reading frame 77	0	0	-0.9	2
55806	HR	hair growth associated	0	0	-0.7	1.6
10861	SLC26A1	solute carrier family 26 (anion exchanger), member 1	0	0	-1.5	1.3
8647	ABCB11	ATP-binding cassette, sub-family B (MDR/TAP), member 11	0	0	-1.6	1.5
59272	ACE2	angiotensin I converting enzyme 2	0	0	-1.6	1.4
55610	CCDC132	coiled-coil domain containing 132	0	0	-1.4	1.6
112609	MRAP2	melanocortin 2 receptor accessory protein 2	0	0	-1.6	1.4
727940	RHOXF2B	Rhox homeobox family, member 2B	0	0	-1.7	1.3
56124	PCDHB12	protocadherin beta 12	0	0	-1.7	1.3
64224	HERPUD2	HERPUD family member 2	0	0	-1.6	1.5
50807	ASAP1	ArfGAP with SH3 domain, ankyrin repeat and PH domain 1	0	0	-1.4	1.6
64283	ARHGEF28	Rho guanine nucleotide exchange factor (GEF) 28	0	0	-0.9	2
3201	HOXA4	homeobox A4	0	0	-1.5	1.5
79690	GAL3ST4	galactose-3-O-sulfotransferase 4	0	0	-0.7	1.5
386682	KRTAP10-3	keratin associated protein 10-3	0	0	-0.7	2
23341	DNAJC16	DnaJ (Hsp40) homolog, subfamily C, member 16	0	0	-1.8	1.2
1296	COL8A2	collagen, type VIII, alpha 2	0	0	-1.7	1.4
338328	GPIHBP1	glycosylphosphatidylinositol anchored high density lipoprotein binding protein 1	0	0	-1.6	1.4
4249	MGAT5	mannosyl (alpha-1,6-)-glycoprotein beta-1,6-N-acetyl-glucosaminyltransferase	0	0	-1.5	1.5
6571	SLC18A2	solute carrier family 18 (vesicular monoamine transporter), member 2	0	0	-1.5	1.7
51177	PLEKHO1	pleckstrin homology domain containing, family O member 1	0	0	-0.9	2
1139	CHRNA7	cholinergic receptor, nicotinic, alpha 7 (neuronal)	0	0	-1.3	1.7

## Sheet: Unt vs Retro rep 1
#GeneID	Symbol	GeneInfo	Element #	casTLE Effect	casTLE Score	Minimum Effect Estimate	Maximum Effect Estimate
439	ASNA1	arsA arsenite transporter, ATP-binding, homolog 1 (bacterial)	10	-2.3	172	-3.2	-1.9
22878	TRAPPC8	trafficking protein particle complex 8	10	-3.6	168	-5.3	-3.1
51552	RAB14	RAB14, member RAS oncogene family	10	-1.5	157	-2.2	-1.2
51542	VPS54	vacuolar protein sorting 54 homolog (S. cerevisiae)	10	-2.5	126	-4	-2.1
55275	VPS53	vacuolar protein sorting 53 homolog (S. cerevisiae)	10	-1.8	117	-2.7	-1.4
64746	ACBD3	acyl-CoA binding domain containing 3	10	-1.3	105	-1.9	-1.1
6729	SRP54	signal recognition particle 54kDa	10	-1.1	104	-1.6	-0.8
9554	SEC22B	SEC22 vesicle trafficking protein homolog B (S. cerevisiae) (gene/pseudogene)	7	-3.3	94.9	-5.4	-2.9
60684	TRAPPC11	trafficking protein particle complex 11	9	-1.6	93.9	-2.5	-1.2
23256	SCFD1	sec1 family domain containing 1	6	-1.4	92.7	-2.6	-1.1
10992	SF3B2	splicing factor 3b, subunit 2, 145kDa	8	-2	89.4	-3.6	-1.6
5717	PSMD11	proteasome (prosome, macropain) 26S subunit, non-ATPase, 11	10	-2	87.4	-3.5	-1.6
8664	EIF3D	eukaryotic translation initiation factor 3, subunit D	8	-1.9	81	-2.9	-1.6
8667	EIF3H	eukaryotic translation initiation factor 3, subunit H	9	-1.7	80.6	-2.7	-1.4
23352	UBR4	ubiquitin protein ligase E3 component n-recognin 4	10	-1.7	77	-2.5	-1.2
5704	PSMC4	proteasome (prosome, macropain) 26S subunit, ATPase, 4	8	1.6	76.4	1.4	2.7
27340	UTP20	UTP20, small subunit (SSU) processome component, homolog (yeast)	9	-1.9	75.2	-3.4	-1.5
9632	SEC24C	SEC24 family member C	10	-1.4	67.1	-2.3	-1
10036	CHAF1A	chromatin assembly factor 1, subunit A (p150)	9	2.7	67.1	2.4	4.7
27095	TRAPPC3	trafficking protein particle complex 3	10	-1.6	66.5	-2.7	-1.3
5862	RAB2A	RAB2A, member RAS oncogene family	10	-1.2	65.8	-1.8	-0.9
9777	TM9SF4	transmembrane 9 superfamily protein member 4	10	-1.2	65.6	-1.7	-0.8
5706	PSMC6	proteasome (prosome, macropain) 26S subunit, ATPase, 6	8	-2.3	65.1	-3.8	-2
5518	PPP2R1A	protein phosphatase 2, regulatory subunit A, alpha	20	-1.4	61.9	-2.4	-1.1
5707	PSMD1	proteasome (prosome, macropain) 26S subunit, non-ATPase, 1	8	2	60.6	1.5	3.7
23028	KDM1A	lysine (K)-specific demethylase 1A	10	1.5	60.3	1.1	2.5
23212	RRS1	RRS1 ribosome biogenesis regulator homolog (S. cerevisiae)	7	-1.7	56.5	-2.9	-1.3
6156	RPL30	ribosomal protein L30	8	-1.7	55.8	-2.8	-1.3
6124	RPL4	ribosomal protein L4	9	-1.5	54.3	-2.6	-1.1
1350	COX7C	cytochrome c oxidase subunit VIIc	10	-1.9	54.3	-2.9	-1.5
4738	NEDD8	neural precursor cell expressed, developmentally down-regulated 8	8	-1.9	54	-3	-1.6
7203	CCT3	chaperonin containing TCP1, subunit 3 (gamma)	10	-2.9	51.8	-4.9	-2.7
51258	MRPL51	mitochondrial ribosomal protein L51	8	-2.2	50.9	-3.9	-1.9
10575	CCT4	chaperonin containing TCP1, subunit 4 (delta)	9	-2.4	50.6	-4	-2.2
6651	SON	SON DNA binding protein	19	1.6	49.4	1.2	2.9
55737	VPS35	vacuolar protein sorting 35 homolog (S. cerevisiae)	8	1.1	47.6	0.9	1.8
10291	SF3A1	splicing factor 3a, subunit 1, 120kDa	17	-2.1	47.3	-3.9	-1.9
58477	SRPRB	signal recognition particle receptor, B subunit	10	0.8	47.2	0.6	1.5
6634	SNRPD3	small nuclear ribonucleoprotein D3 polypeptide 18kDa	8	1	45	0.8	1.8
23168	RTF1	Rtf1, Paf1/RNA polymerase II complex component, homolog (S. cerevisiae)	8	1.9	43.2	1.6	3.8
83548	COG3	component of oligomeric golgi complex 3	9	1.6	43.1	1.3	3
498	ATP5A1	ATP synthase, H+ transporting, mitochondrial F1 complex, alpha subunit 1, cardiac muscle	20	-0.8	43	-1.2	-0.6
1981	EIF4G1	eukaryotic translation initiation factor 4 gamma, 1	9	1.9	40.8	1.6	3
2091	FBL	fibrillarin	6	-1.3	39.6	-2	-1
6194	RPS6	ribosomal protein S6	8	-1.9	38.4	-3.9	-1.6
3608	ILF2	interleukin enhancer binding factor 2	7	-1.4	38.4	-2	-1
55699	IARS2	isoleucyl-tRNA synthetase 2, mitochondrial	6	3	38.1	2.7	5.8
5426	POLE	polymerase (DNA directed), epsilon, catalytic subunit	9	-1.5	37.2	-2.9	-1.2
400	ARL1	ADP-ribosylation factor-like 1	10	-1.3	35.3	-2	-0.9
6599	SMARCC1	SWI/SNF related, matrix associated, actin dependent regulator of chromatin, subfamily c, member 1	9	0.7	33.3	0.4	1.3
506	ATP5B	ATP synthase, H+ transporting, mitochondrial F1 complex, beta polypeptide	8	-2.5	33.3	-5	2.2
8295	TRRAP	transformation/transcription domain-associated protein	9	1.2	33	0.8	1.9
5511	PPP1R8	protein phosphatase 1, regulatory subunit 8	10	0.8	32.2	0.5	1.5
6181	RPLP2	ribosomal protein, large, P2	7	0.9	31.6	0.7	1.8
7415	VCP	valosin containing protein	7	1	30.8	0.7	1.8
3190	HNRNPK	heterogeneous nuclear ribonucleoprotein K	9	0.8	30.1	-1.9	2
25813	SAMM50	SAMM50 sorting and assembly machinery component	6	-1.3	29.4	-2	-1
25879	DCAF13	DDB1 and CUL4 associated factor 13	9	-2.5	29.4	-4.9	-2.2
6836	SURF4	surfeit 4	10	-1	29.3	-1.7	-0.6
9559	VPS26A	vacuolar protein sorting 26 homolog A (S. pombe)	10	1.9	29.2	1.5	3
51138	COPS4	COP9 signalosome subunit 4	10	1.6	29	-2.1	3
5700	PSMC1	proteasome (prosome, macropain) 26S subunit, ATPase, 1	8	-1.7	28.6	-3	-1.4
7917	BAG6	BCL2-associated athanogene 6	10	2.1	28.4	1	4
9919	SEC16A	SEC16 homolog A (S. cerevisiae)	10	-1.2	28.3	-2	-0.6
4605	MYBL2	v-myb avian myeloblastosis viral oncogene homolog-like 2	7	-2.3	28.3	-4	-2.1
25839	COG4	component of oligomeric golgi complex 4	10	-1.1	28	-2	-0.9
6240	RRM1	ribonucleotide reductase M1	6	-1.5	28	-3	1.2
23160	WDR43	WD repeat domain 43	10	1.4	26.5	0.8	2.6
51575	ESF1	ESF1, nucleolar pre-rRNA processing protein, homolog (S. cerevisiae)	18	-1.4	26.3	-2	-1.1
1315	COPB1	coatomer protein complex, subunit beta 1	5	2.1	25.9	1.9	4
6301	SARS	seryl-tRNA synthetase	5	1	25.8	0.8	2
51430	SUCO	SUN domain containing ossification factor	10	-0.8	25.2	-1.4	-0.5
1639	DCTN1	dynactin 1	10	1.5	25.1	1.2	3
9276	COPB2	coatomer protein complex, subunit beta 2 (beta prime)	6	-1.3	25	-2	-1.1
5770	PTPN1	protein tyrosine phosphatase, non-receptor type 1	10	0.7	25	0.4	1.2
6721	SREBF2	sterol regulatory element binding transcription factor 2	10	-1.2	24.7	-2	-0.9
285855	RPL7L1	ribosomal protein L7-like 1	10	-2	24.3	-4	-1.8
6155	RPL27	ribosomal protein L27	7	-1.3	24.3	-2	-1.1
372	ARCN1	archain 1	4	-1.2	24.2	-2	-0.9
5709	PSMD3	proteasome (prosome, macropain) 26S subunit, non-ATPase, 3	10	-1.5	24	-3	-1.2
80218	NAA50	N(alpha)-acetyltransferase 50, NatE catalytic subunit	10	-2.4	23.7	-4	-2.2
9054	NFS1	NFS1 cysteine desulfurase	10	-2.4	23.5	-4	-2.2
1314	COPA	coatomer protein complex, subunit alpha	6	-2.5	23.5	-5	-2.2
6293	VPS52	vacuolar protein sorting 52 homolog (S. cerevisiae)	10	-1.8	23	-3	-1.5
9126	SMC3	structural maintenance of chromosomes 3	9	2	23	1.8	4
5688	PSMA7	proteasome (prosome, macropain) subunit, alpha type, 7	10	1.5	22.7	-0.6	3
8665	EIF3F	eukaryotic translation initiation factor 3, subunit F	8	-2.8	22.3	-5	-2.6
9262	STK17B	serine/threonine kinase 17b	10	1.9	22.1	1.6	3
8661	EIF3A	eukaryotic translation initiation factor 3, subunit A	6	-1.1	21.6	-2	-0.8
7026	NR2F2	nuclear receptor subfamily 2, group F, member 2	10	-1.2	21.4	-2	-0.8
10885	WDR3	WD repeat domain 3	8	-0.6	20.8	-1.6	-0.3
4677	NARS	asparaginyl-tRNA synthetase	10	0.6	19.5	0.4	1.3
5708	PSMD2	proteasome (prosome, macropain) 26S subunit, non-ATPase, 2	8	2.2	19.3	2	4
7360	UGP2	UDP-glucose pyrophosphorylase 2	10	-0.2	19.2	-1.8	-0.2
8563	THOC5	THO complex 5	7	1.2	18.9	1	2
6129	RPL7	ribosomal protein L7	8	0.7	18.7	-1.6	2
55015	PRPF39	pre-mRNA processing factor 39	10	0.6	18.1	0.3	1.9
51096	UTP18	UTP18 small subunit (SSU) processome component homolog (yeast)	10	1.3	17.6	0.8	2
9039	UBA3	ubiquitin-like modifier activating enzyme 3	8	-1	17.4	-2	-0.8
10342	TFG	TRK-fused gene	10	2.6	17.2	2.3	5
646960	PRSS56	protease, serine, 56	10	0.8	16.8	0.5	2
10075	HUWE1	HECT, UBA and WWE domain containing 1, E3 ubiquitin protein ligase	10	0.5	16.4	0.3	1.2
6165	RPL35A	ribosomal protein L35a	10	1.3	15.9	-1.1	2
6160	RPL31	ribosomal protein L31	4	1.2	15.8	1	2
7272	TTK	TTK protein kinase	7	-0.8	15.7	-2	4.1
2800	GOLGA1	golgin A1	10	-0.4	13.5	-1.1	-0.2
1660	DHX9	DEAH (Asp-Glu-Ala-His) box helicase 9	10	-1	13.4	-2	-0.6
51386	EIF3L	eukaryotic translation initiation factor 3, subunit L	10	0.9	13.2	0.3	1.9
152559	PAQR3	progestin and adipoQ receptor family member III	10	1	12.7	0.3	1.7
126003	TRAPPC5	trafficking protein particle complex 5	9	-0.5	12.6	-1.5	-0.2
203068	TUBB	tubulin, beta class I	18	1.5	12.6	1.2	3
160	AP2A1	adaptor-related protein complex 2, alpha 1 subunit	10	-0.5	12.4	-1.4	-0.2
29882	ANAPC2	anaphase promoting complex subunit 2	8	0.8	12.1	-1.4	2
79029	SPATA5L1	spermatogenesis associated 5-like 1	10	-0.7	11.5	-2	2.8
80018	NAA25	N(alpha)-acetyltransferase 25, NatB auxiliary subunit	8	-1	11.2	-2	1.9
51693	TRAPPC2L	trafficking protein particle complex 2-like	10	-0.7	10.9	-1.8	-0.3
5868	RAB5A	RAB5A, member RAS oncogene family	10	-0.4	10.8	-1.2	-0.1
11224	RPL35	ribosomal protein L35	9	0.9	10.4	-0.5	2
219988	PATL1	protein associated with topoisomerase II homolog 1 (yeast)	10	0.5	10	0.1	1.8
169714	QSOX2	quiescin Q6 sulfhydryl oxidase 2	10	-0.5	9.99	-1.5	-0.2
6185	RPN2	ribophorin II	10	0.4	9.96	0.2	1.1
5591	PRKDC	protein kinase, DNA-activated, catalytic polypeptide	10	0.5	9.53	0.1	1.4
11196	SEC23IP	SEC23 interacting protein	10	-0.5	9.52	-1.5	-0.2
5885	RAD21	RAD21 homolog (S. pombe)	10	-1	9.27	-2	0.6
121665	SPPL3	signal peptide peptidase like 3	10	-0.5	8.68	-1.6	-0.2
5861	RAB1A	RAB1A, member RAS oncogene family	10	-0.4	8.01	-1.5	-0.1
10498	CARM1	coactivator-associated arginine methyltransferase 1	10	0.8	7.69	-0.4	2
283171	C11ORF44	chromosome 11 open reading frame 44	10	0.5	7.23	0.1	1.8
10959	TMED2	transmembrane emp24 domain trafficking protein 2	10	-0.4	7.18	-1.6	-0.1
8570	KHSRP	KH-type splicing regulatory protein	9	0.8	7.09	0.3	2
22930	RAB3GAP1	RAB3 GTPase activating protein subunit 1 (catalytic)	10	-0.6	7.03	-1.8	-0.2
10802	SEC24A	SEC24 family member A	10	-0.3	6.94	-1.4	0
55288	RHOT1	ras homolog family member T1	10	-0.7	6.76	-2	0.4
259282	BOD1L1	biorientation of chromosomes in cell division 1-like 1	20	0.3	6.29	-0.9	2
89866	SEC16B	SEC16 homolog B (S. cerevisiae)	10	-0.8	6.2	-2	-0.4
150946	GAREML	GRB2 associated, regulator of MAPK1-like	20	-0.3	6.14	-0.9	0.3
60559	SPCS3	signal peptidase complex subunit 3 homolog (S. cerevisiae)	20	0.3	5.98	0.1	1.9
6449	SGTA	small glutamine-rich tetratricopeptide repeat (TPR)-containing, alpha	10	0.4	5.91	0	1.6
6154	RPL26	ribosomal protein L26	8	-0.7	5.89	-2	0.4
91419	XRCC6BP1	XRCC6 binding protein 1	10	0.5	5.8	0.1	2
890	CCNA2	cyclin A2	10	0.5	5.79	-1.6	2
10484	SEC23A	Sec23 homolog A (S. cerevisiae)	10	1.5	5.61	1	3
8907	AP1M1	adaptor-related protein complex 1, mu 1 subunit	10	0.3	5.45	-0.2	1.6
10541	ANP32B	acidic (leucine-rich) nuclear phosphoprotein 32 family, member B	10	0.3	5.44	-0.2	1.7
51495	PTPLAD1	protein tyrosine phosphatase-like A domain containing 1	10	0.3	5.44	-0.1	1.7
56681	SAR1A	secretion associated, Ras related GTPase 1A	10	-0.3	5.39	-1.8	0.1
6230	RPS25	ribosomal protein S25	10	0.4	5.36	-0.2	1.7
7371	UCK2	uridine-cytidine kinase 2	10	2.5	5.35	-0.8	5
55837	EAPP	E2F-associated phosphoprotein	10	0.4	5.34	0	1.8
3692	EIF6	eukaryotic translation initiation factor 6	6	-0.6	5.31	-2	1.3
54808	DYM	dymeclin	9	-0.3	5.24	-1.8	0.2
1984	EIF5A	eukaryotic translation initiation factor 5A	9	0.4	4.83	-1.9	2
23760	PITPNB	phosphatidylinositol transfer protein, beta	10	1.3	4.77	0.1	2
58533	SNX6	sorting nexin 6	10	0.5	4.71	-0.6	2
9782	MATR3	matrin 3	10	-0.4	4.7	-2	0
84304	NUDT22	nudix (nucleoside diphosphate linked moiety X)-type motif 22	10	0.6	4.66	-0.1	2
81876	RAB1B	RAB1B, member RAS oncogene family	9	-0.5	4.62	-1.8	1.6
1056	CEL	carboxyl ester lipase	10	1.3	4.58	0	2
1457	CSNK2A1	casein kinase 2, alpha 1 polypeptide	10	-0.3	4.41	-1.9	0.2
1137	CHRNA4	cholinergic receptor, nicotinic, alpha 4 (neuronal)	10	-1	4.36	-2	0
1387	CREBBP	CREB binding protein	10	-0.2	4.35	-1.9	0.5
10483	SEC23B	Sec23 homolog B (S. cerevisiae)	10	-0.2	4.07	-2	0.2
3141	HLCS	holocarboxylase synthetase (biotin-(proprionyl-CoA-carboxylase (ATP-hydrolysing)) ligase)	20	-0.2	3.72	-1.8	0.2
79822	ARHGAP28	Rho GTPase activating protein 28	10	0.3	3.65	-0.5	2
387264	KRTAP5-1	keratin associated protein 5-1	10	0.6	3.54	-0.7	2
9399	STOML1	stomatin (EPB72)-like 1	10	0.3	3.5	-1.1	1.8
27439	CECR6	cat eye syndrome chromosome region, candidate 6	10	-0.4	3.39	-2	0.7
3326	HSP90AB1	heat shock protein 90kDa alpha (cytosolic), class B member 1	10	0.2	3.3	-1.5	1.5
285605	DTWD2	DTW domain containing 2	10	-0.3	3.18	-2	0.5
51566	ARMCX3	armadillo repeat containing, X-linked 3	10	0.2	3.09	-0.9	2
84720	PIGO	phosphatidylinositol glycan anchor biosynthesis, class O	10	-0.4	3.06	-2	0.9
25853	DCAF12	DDB1 and CUL4 associated factor 12	10	0.2	3.05	-0.8	2
57661	PHRF1	PHD and ring finger domains 1	10	-0.3	2.93	-1.3	2
5757	PTMA	prothymosin, alpha	10	0.2	2.84	-1	2
10642	IGF2BP1	insulin-like growth factor 2 mRNA binding protein 1	10	0.2	2.71	-0.9	2
116541	MRPL54	mitochondrial ribosomal protein L54	10	0.2	2.64	-2	1.1
25900	IFFO1	intermediate filament family orphan 1	20	1	2.55	-0.3	2
2683	B4GALT1	UDP-Gal:betaGlcNAc beta 1,4- galactosyltransferase, polypeptide 1	10	0.3	2.51	-0.8	2
55504	TNFRSF19	tumor necrosis factor receptor superfamily, member 19	20	0.2	2.49	-0.5	1.7
23163	GGA3	golgi-associated, gamma adaptin ear containing, ARF binding protein 3	10	-0.2	2.48	-1.8	1.4
643641	ZNF862	zinc finger protein 862	10	0.2	2.4	-1.3	1.9
23526	HMHA1	histocompatibility (minor) HA-1	10	-0.3	2.38	-2	1
85446	ZFHX2	zinc finger homeobox 2	20	0.4	2.37	-0.2	1.8
55244	SLC47A1	solute carrier family 47 (multidrug and toxin extrusion), member 1	10	-0.2	2.32	-2	1
166614	DCLK2	doublecortin-like kinase 2	10	-0.9	2.31	-2	0.5
386682	KRTAP10-3	keratin associated protein 10-3	10	1.1	2.18	-0.6	2
5031	P2RY6	pyrimidinergic receptor P2Y, G-protein coupled, 6	10	0.2	2.09	-1.1	2
10142	AKAP9	A kinase (PRKA) anchor protein 9	10	0.7	1.96	-1	2
221079	ARL5B	ADP-ribosylation factor-like 5B	10	0.5	1.94	-0.7	2
283870	BRICD5	BRICHOS domain containing 5	10	0.3	1.85	-1	2
51177	PLEKHO1	pleckstrin homology domain containing, family O member 1	10	0.6	1.73	-0.7	2
10146	G3BP1	GTPase activating protein (SH3 domain) binding protein 1	10	0.2	1.61	-1.2	2
375	ARF1	ADP-ribosylation factor 1	10	0.4	1.61	-0.8	2
8653	DDX3Y	DEAD (Asp-Glu-Ala-Asp) box helicase 3, Y-linked	10	0.2	1.56	-1.1	2
29117	BRD7	bromodomain containing 7	10	0.2	1.51	-1.2	2
65264	UBE2Z	ubiquitin-conjugating enzyme E2Z	10	-0.2	1.46	-2	1.1
279	AMY2A	amylase, alpha 2A (pancreatic)	10	0.1	1.45	-1.4	2
8943	AP3D1	adaptor-related protein complex 3, delta 1 subunit	10	-0.3	1.4	-2	1.2
4248	MGAT3	mannosyl (beta-1,4-)-glycoprotein beta-1,4-N-acetylglucosaminyltransferase	9	0.2	1.37	-1.3	2
8694	DGAT1	diacylglycerol O-acyltransferase 1	10	0.2	1.16	-1.4	1.9
2804	GOLGB1	golgin B1	10	-0.1	1.16	-2	1
4247	MGAT2	mannosyl (alpha-1,6-)-glycoprotein beta-1,2-N-acetylglucosaminyltransferase	10	0.2	1.11	-1.3	2
6596	HLTF	helicase-like transcription factor	10	0.5	1.03	-1.1	2
84283	TMEM79	transmembrane protein 79	10	0.2	0.976	-1.2	2
6996	TDG	thymine-DNA glycosylase	10	-0.1	0.953	-2	1.4
3320	HSP90AA1	heat shock protein 90kDa alpha (cytosolic), class A member 1	10	-0.2	0.95	-2	1.3
2762	GMDS	GDP-mannose 4,6-dehydratase	10	0.3	0.941	-1.2	2
353324	SPATA12	spermatogenesis associated 12	10	0.1	0.915	-2	1.4
124245	ZC3H18	zinc finger CCCH-type containing 18	10	-0.1	0.914	-1.6	1.8
90933	TRIM41	tripartite motif containing 41	10	-0.1	0.909	-2	1.4
27430	MAT2B	methionine adenosyltransferase II, beta	20	0.2	0.885	-1.2	1.7
3609	ILF3	interleukin enhancer binding factor 3, 90kDa	10	-0.1	0.873	-1.7	1.7
8450	CUL4B	cullin 4B	10	0.2	0.872	-1.4	2
64283	ARHGEF28	Rho guanine nucleotide exchange factor (GEF) 28	10	0.5	0.841	-1	2
5867	RAB4A	RAB4A, member RAS oncogene family	10	0.2	0.82	-1.4	2
84189	SLITRK6	SLIT and NTRK-like family, member 6	10	0.3	0.777	-1.2	2
5694	PSMB6	proteasome (prosome, macropain) subunit, beta type, 6	17	-1	0.741	-2	0.6
23469	PHF3	PHD finger protein 3	10	-0.1	0.723	-2	1.4
84548	TMEM185A	transmembrane protein 185A	10	-0.2	0.693	-2	1.3
2302	FOXJ1	forkhead box J1	10	0.3	0.692	-1.2	2
100132146	LOC100132146	uncharacterized LOC100132146	10	-0.1	0.665	-2	1.5
4904	YBX1	Y box binding protein 1	10	0.2	0.627	-1.7	1.7
56850	GRIPAP1	GRIP1 associated protein 1	10	0.1	0.597	-2	1.3
LOC100289187	LOC100289187	N/A	10	-0.1	0.575	-1.8	1.7
8412	BCAR3	breast cancer anti-estrogen resistance 3	20	0.1	0.547	-1.3	1.6
869	CBLN1	cerebellin 1 precursor	10	-0.1	0.52	-2	1.4
149699	GTSF1L	gametocyte specific factor 1-like	10	0.1	0.517	-1.5	2
10427	SEC24B	SEC24 family member B	10	0.1	0.46	-1.6	1.8
64130	LIN7B	lin-7 homolog B (C. elegans)	10	-0.1	0.445	-2	1.4
8675	STX16	syntaxin 16	10	0.1	0.388	-2	1.3
8989	TRPA1	transient receptor potential cation channel, subfamily A, member 1	10	0.1	0.388	-1.7	1.8
9706	ULK2	unc-51 like autophagy activating kinase 2	10	0.1	0.357	-1.5	2
23119	HIC2	hypermethylated in cancer 2	20	0.1	0.33	-1.6	1.5
55163	PNPO	pyridoxamine 5'-phosphate oxidase	10	-0.1	0.31	-2	1.4
112609	MRAP2	melanocortin 2 receptor accessory protein 2	10	-0.1	0.299	-1.9	1.6
23071	ERP44	endoplasmic reticulum protein 44	10	-0.1	0.288	-2	1.5
255488	RNF144B	ring finger protein 144B	10	0.1	0.288	-2	1.5
10297	APC2	adenomatosis polyposis coli 2	20	0.1	0.266	-0.6	2
6484	ST3GAL4	ST3 beta-galactoside alpha-2,3-sialyltransferase 4	10	0.4	0.262	-1.3	2
4170	MCL1	myeloid cell leukemia 1	10	0.1	0.226	-2	1.4
63035	BCORL1	BCL6 corepressor-like 1	10	-0.2	0.189	-2	1.5
79979	TRMT2B	tRNA methyltransferase 2 homolog B (S. cerevisiae)	10	-0.1	0.181	-1.4	2
23277	CLUH	clustered mitochondria (cluA/CLU1) homolog	10	-0.1	0.138	-2	1.5
196415	C12ORF77	chromosome 12 open reading frame 77	10	0.1	0.0929	-1.4	2
1139	CHRNA7	cholinergic receptor, nicotinic, alpha 7 (neuronal)	10	-0.1	0.0828	-1.9	1.6
50807	ASAP1	ArfGAP with SH3 domain, ankyrin repeat and PH domain 1	10	0.1	0.068	-1.5	2
4897	NRCAM	neuronal cell adhesion molecule	10	-0.1	0.0652	-2	1.5
10492	SYNCRIP	synaptotagmin binding, cytoplasmic RNA interacting protein	9	-0.1	0.00787	-1.9	1.6
2939	GSTA2	glutathione S-transferase alpha 2	10	0	0	-1.8	1.8
10972	TMED10	transmembrane emp24-like trafficking protein 10 (yeast)	9	0	0	-2	1.6
361	AQP4	aquaporin 4	10	0	0	-1.6	2
2134	EXTL1	exostosin-like glycosyltransferase 1	10	0	0	-2	1.6
147199	SCGB1C1	secretoglobin, family 1C, member 1	10	0	0	-1.8	1.8
27333	GOLIM4	golgi integral membrane protein 4	10	0	0	-2	1.6
25818	KLK5	kallikrein-related peptidase 5	10	0	0	-1.9	1.7
9465	AKAP7	A kinase (PRKA) anchor protein 7	10	0	0	-1.9	1.7
6399	TRAPPC2	trafficking protein particle complex 2	10	0	0	-2	1.5
10290	SPEG	SPEG complex locus	19	0	0	-1.6	1.5
440270	GOLGA8B	golgin A8 family, member B	10	0	0	-1.5	2
100129520	LOC100129520	testis expressed sequence 13-like	10	0	0	-1.4	2
55806	HR	hair growth associated	20	0	0	-1.9	1.4
81493	SYNC	syncoilin, intermediate filament protein	10	0	0	-1.9	1.7
139324	HDX	highly divergent homeobox	10	0	0	-1.9	1.6
221091	LRRN4CL	LRRN4 C-terminal like	10	0	0	-1.7	1.9
55717	WDR11	WD repeat domain 11	10	0	0	-1.6	1.9
59272	ACE2	angiotensin I converting enzyme 2	10	0	0	-1.7	1.8
10861	SLC26A1	solute carrier family 26 (anion exchanger), member 1	10	0	0	-1.5	2
8647	ABCB11	ATP-binding cassette, sub-family B (MDR/TAP), member 11	10	0	0	-1.9	1.7
118670	FAM24A	family with sequence similarity 24, member A	10	0	0	-1.5	2
727940	RHOXF2B	Rhox homeobox family, member 2B	10	0	0	-1.8	1.8
26225	ARL5A	ADP-ribosylation factor-like 5A	10	0	0	-1.9	1.6
55610	CCDC132	coiled-coil domain containing 132	10	0	0	-1.6	2
60481	ELOVL5	ELOVL fatty acid elongase 5	10	0	0	-1.4	2
4249	MGAT5	mannosyl (alpha-1,6-)-glycoprotein beta-1,6-N-acetyl-glucosaminyltransferase	10	0	0	-2	1.6
140032	RPS4Y2	ribosomal protein S4, Y-linked 2	10	0	0	-1.9	1.6
50999	TMED5	transmembrane emp24 protein transport domain containing 5	10	0	0	-1.4	2
56124	PCDHB12	protocadherin beta 12	10	0	0	-2	1.5
9457	FHL5	four and a half LIM domains 5	10	0	0	-1.9	1.7
642517	AGAP9	ArfGAP with GTPase domain, ankyrin repeat and PH domain 9	10	0	0	-2	1.5
3006	HIST1H1C	histone cluster 1, H1c	10	0	0	-1.9	1.7
3201	HOXA4	homeobox A4	10	0	0	-1.9	1.6
79690	GAL3ST4	galactose-3-O-sulfotransferase 4	20	0	0	-2	1.2
64224	HERPUD2	HERPUD family member 2	10	0	0	-1.9	1.6
23341	DNAJC16	DnaJ (Hsp40) homolog, subfamily C, member 16	10	0	0	-2	1.5
1296	COL8A2	collagen, type VIII, alpha 2	10	0	0	-1.9	1.6
6571	SLC18A2	solute carrier family 18 (vesicular monoamine transporter), member 2	9	0	0	-1.8	1.8
338328	GPIHBP1	glycosylphosphatidylinositol anchored high density lipoprotein binding protein 1	10	0	0	-1.7	1.8

## Sheet: Unt vs Retro rep 2
#GeneID	Symbol	GeneInfo	Element #	casTLE Effect	casTLE Score	Minimum Effect Estimate	Maximum Effect Estimate
23256	SCFD1	sec1 family domain containing 1	7	-2.6	70.2	-4.1	-2.2
25900	IFFO1	intermediate filament family orphan 1	20	-0.3	4.85	-1.2	0.1
6185	RPN2	ribophorin II	10	0.4	3.79	-0.7	2
64130	LIN7B	lin-7 homolog B (C. elegans)	10	0.1	0.211	-1.6	1.9
5867	RAB4A	RAB4A, member RAS oncogene family	10	0.1	0.00851	-1.5	2
4897	NRCAM	neuronal cell adhesion molecule	10	0.3	3.69	-0.7	2
8907	AP1M1	adaptor-related protein complex 1, mu 1 subunit	10	0.1	0.578	-1.2	2
2939	GSTA2	glutathione S-transferase alpha 2	10	0	0	-1.6	1.9
6599	SMARCC1	SWI/SNF related, matrix associated, actin dependent regulator of chromatin, subfamily c, member 1	9	0.4	10.7	0.1	1
10541	ANP32B	acidic (leucine-rich) nuclear phosphoprotein 32 family, member B	10	-0.7	4.6	-2	0
4677	NARS	asparaginyl-tRNA synthetase	8	-1	4.56	-2	0.1
11196	SEC23IP	SEC23 interacting protein	10	-0.5	5.17	-1.9	-0.1
56681	SAR1A	secretion associated, Ras related GTPase 1A	10	-0.3	5.64	-1.7	0
84304	NUDT22	nudix (nucleoside diphosphate linked moiety X)-type motif 22	10	-1.1	9.89	-2	-0.6
84548	TMEM185A	transmembrane protein 185A	10	-0.2	1.07	-2	1.3
90933	TRIM41	tripartite motif containing 41	10	-0.2	0.964	-2	1.3
7360	UGP2	UDP-glucose pyrophosphorylase 2	10	-0.4	5.2	-2	0.1
10972	TMED10	transmembrane emp24-like trafficking protein 10 (yeast)	9	-0.4	11.3	-1.1	-0.2
10075	HUWE1	HECT, UBA and WWE domain containing 1, E3 ubiquitin protein ligase	10	0.5	21.2	0.3	1.2
55015	PRPF39	pre-mRNA processing factor 39	10	1.3	31	0.9	2
51386	EIF3L	eukaryotic translation initiation factor 3, subunit L	10	0.5	0.311	-1.2	2
8667	EIF3H	eukaryotic translation initiation factor 3, subunit H	9	-1	22.5	-1.8	-0.7
54808	DYM	dymeclin	9	-0.2	2.38	-2	0.9
8661	EIF3A	eukaryotic translation initiation factor 3, subunit A	8	2.1	27.5	1.8	4
285855	RPL7L1	ribosomal protein L7-like 1	10	-1.9	33.7	-3	-1.6
8664	EIF3D	eukaryotic translation initiation factor 3, subunit D	7	1.5	90.3	1.3	2.8
5511	PPP1R8	protein phosphatase 1, regulatory subunit 8	10	-2.8	25.6	-4.9	-2.4
8665	EIF3F	eukaryotic translation initiation factor 3, subunit F	10	-0.6	5.13	-2	0.2
3326	HSP90AB1	heat shock protein 90kDa alpha (cytosolic), class B member 1	10	0	0	-1.4	2
2800	GOLGA1	golgin A1	10	-0.4	4.14	-2	0.2
149699	GTSF1L	gametocyte specific factor 1-like	10	0.1	0.741	-1.3	2
51258	MRPL51	mitochondrial ribosomal protein L51	8	2.5	45.4	2.2	4.8
124245	ZC3H18	zinc finger CCCH-type containing 18	10	0.3	3.6	-1.7	1.4
55244	SLC47A1	solute carrier family 47 (multidrug and toxin extrusion), member 1	10	0	0	-1.7	1.8
79822	ARHGAP28	Rho GTPase activating protein 28	10	0.5	0.969	-1	2
166614	DCLK2	doublecortin-like kinase 2	10	-0.3	0.821	-2	1.1
84189	SLITRK6	SLIT and NTRK-like family, member 6	10	0	0	-1.6	2
1660	DHX9	DEAH (Asp-Glu-Ala-His) box helicase 9	10	0.6	3.38	-0.6	2
361	AQP4	aquaporin 4	10	-0.1	0.681	-2	1.4
283870	BRICD5	BRICHOS domain containing 5	10	0.1	0.226	-1.5	2
5868	RAB5A	RAB5A, member RAS oncogene family	10	-0.1	0.352	-2	1.5
8653	DDX3Y	DEAD (Asp-Glu-Ala-Asp) box helicase 3, Y-linked	10	0	0	-1.9	1.7
10492	SYNCRIP	synaptotagmin binding, cytoplasmic RNA interacting protein	10	0	0	-1.5	2
83548	COG3	component of oligomeric golgi complex 3	9	-2.3	85.2	-3.5	-1.9
2134	EXTL1	exostosin-like glycosyltransferase 1	10	-0.3	2.65	-2	0.9
56850	GRIPAP1	GRIP1 associated protein 1	10	0.1	0.397	-1.5	2
25839	COG4	component of oligomeric golgi complex 4	10	-0.9	13.1	-1.8	-0.5
147199	SCGB1C1	secretoglobin, family 1C, member 1	10	0.3	2.72	-1.6	1.7
27333	GOLIM4	golgi integral membrane protein 4	10	0.4	2.92	-0.8	2
10802	SEC24A	SEC24 family member A	10	-0.2	3.27	-2	0.6
25818	KLK5	kallikrein-related peptidase 5	10	0	0	-1.9	1.7
9632	SEC24C	SEC24 family member C	10	-1.6	64.4	-2.6	-1.3
5700	PSMC1	proteasome (prosome, macropain) 26S subunit, ATPase, 1	8	2.3	42.8	1.9	3.8
55737	VPS35	vacuolar protein sorting 35 homolog (S. cerevisiae)	9	1.1	74.9	0.8	1.8
29117	BRD7	bromodomain containing 7	10	-0.1	0.663	-2	1.4
9262	STK17B	serine/threonine kinase 17b	10	-0.5	4.14	-2	0.6
8563	THOC5	THO complex 5	8	1.2	25.4	0.9	2
23352	UBR4	ubiquitin protein ligase E3 component n-recognin 4	10	-0.6	20.3	-1.2	-0.3
22878	TRAPPC8	trafficking protein particle complex 8	10	-3.1	111	-4.7	-2.5
9465	AKAP7	A kinase (PRKA) anchor protein 7	10	-0.2	1.41	-2	1.2
6634	SNRPD3	small nuclear ribonucleoprotein D3 polypeptide 18kDa	8	1.8	52.1	1.6	3
5757	PTMA	prothymosin, alpha	10	0.6	5.89	0.1	1.9
6194	RPS6	ribosomal protein S6	8	3.4	92.7	3	5.6
27095	TRAPPC3	trafficking protein particle complex 3	10	-2.8	49.5	-4.7	-2.4
6399	TRAPPC2	trafficking protein particle complex 2	10	-0.3	4.47	-1.9	0.2
126003	TRAPPC5	trafficking protein particle complex 5	9	-1.2	39.8	-2	-1
10142	AKAP9	A kinase (PRKA) anchor protein 9	10	-0.2	1.02	-2	1.3
372	ARCN1	archain 1	5	0.9	22.2	0.6	1.9
5694	PSMB6	proteasome (prosome, macropain) subunit, beta type, 6	18	2	82.2	1.7	3.5
9054	NFS1	NFS1 cysteine desulfurase	10	-1.4	20.1	-2	-1
55163	PNPO	pyridoxamine 5'-phosphate oxidase	10	0.2	0.895	-1.3	2
1315	COPB1	coatomer protein complex, subunit beta 1	4	1	32.7	0.8	2
10290	SPEG	SPEG complex locus	20	0.1	0.102	-1.5	1.5
9276	COPB2	coatomer protein complex, subunit beta 2 (beta prime)	7	1.3	26	1	2
4904	YBX1	Y box binding protein 1	10	-0.6	2.66	-2	0.5
1981	EIF4G1	eukaryotic translation initiation factor 4 gamma, 1	10	1.2	96.1	1	1.8
440270	GOLGA8B	golgin A8 family, member B	10	-0.1	0.193	-1.5	1.9
100129520	LOC100129520	testis expressed sequence 13-like	10	-0.3	1.28	-2	1.1
196415	C12ORF77	chromosome 12 open reading frame 77	10	0	0	-1.6	2
55806	HR	hair growth associated	20	0.2	1.89	-0.7	2
6129	RPL7	ribosomal protein L7	9	0.6	19.1	0.2	1.4
6124	RPL4	ribosomal protein L4	8	1.4	45.5	1.1	2
51495	PTPLAD1	protein tyrosine phosphatase-like A domain containing 1	10	0.1	0.591	-2	1.3
1984	EIF5A	eukaryotic translation initiation factor 5A	9	0.7	10.4	0.3	2
81493	SYNC	syncoilin, intermediate filament protein	10	-1.5	8.01	-3	-1.1
51138	COPS4	COP9 signalosome subunit 4	9	1.4	36.5	0.9	2
139324	HDX	highly divergent homeobox	10	0.1	1.72	-1.2	2
221091	LRRN4CL	LRRN4 C-terminal like	10	0.1	1.55	-1.2	2
1314	COPA	coatomer protein complex, subunit alpha	9	1.2	27.4	-3.1	2
80218	NAA50	N(alpha)-acetyltransferase 50, NatE catalytic subunit	10	1.2	56.8	1	2
9782	MATR3	matrin 3	10	0.1	1.13	-2	1.3
63035	BCORL1	BCL6 corepressor-like 1	10	0.2	1	-1.2	2
9919	SEC16A	SEC16 homolog A (S. cerevisiae)	10	0.3	4.43	-0.5	1.8
4249	MGAT5	mannosyl (alpha-1,6-)-glycoprotein beta-1,6-N-acetyl-glucosaminyltransferase	10	0.1	0.824	-1.5	2
51430	SUCO	SUN domain containing ossification factor	10	-0.6	29.3	-1.2	-0.5
55504	TNFRSF19	tumor necrosis factor receptor superfamily, member 19	20	0	0	-1.7	1.5
85446	ZFHX2	zinc finger homeobox 2	20	3.4	17.8	3.3	6
55699	IARS2	isoleucyl-tRNA synthetase 2, mitochondrial	7	-1.4	34.8	-2	-1.1
23160	WDR43	WD repeat domain 43	8	1.7	23.8	1.3	3
8694	DGAT1	diacylglycerol O-acyltransferase 1	10	0.5	2.92	-0.8	2
7203	CCT3	chaperonin containing TCP1, subunit 3 (gamma)	10	2.3	32.2	2	3.9
6484	ST3GAL4	ST3 beta-galactoside alpha-2,3-sialyltransferase 4	10	-2.6	1.37	-5	0.8
100132146	LOC100132146	uncharacterized LOC100132146	10	0	0	-1.8	1.8
10575	CCT4	chaperonin containing TCP1, subunit 4 (delta)	8	-1.6	33.1	-3	0.9
7272	TTK	TTK protein kinase	8	-1.8	37	-3	-1.4
84283	TMEM79	transmembrane protein 79	10	-0.1	0.886	-1.9	1.5
2762	GMDS	GDP-mannose 4,6-dehydratase	10	-0.2	2.25	-2	1
10291	SF3A1	splicing factor 3a, subunit 1, 120kDa	18	2.4	45.6	2.2	4
59272	ACE2	angiotensin I converting enzyme 2	10	0	0	-2	1.6
2683	B4GALT1	UDP-Gal:betaGlcNAc beta 1,4- galactosyltransferase, polypeptide 1	10	0	0	-1.7	1.8
6836	SURF4	surfeit 4	10	-0.9	30.4	-1.5	-0.6
10885	WDR3	WD repeat domain 3	7	0.8	11.5	0.3	1.8
2302	FOXJ1	forkhead box J1	10	0.1	0.108	-1.4	2
23277	CLUH	clustered mitochondria (cluA/CLU1) homolog	10	-0.4	5.12	-1.8	0.2
646960	PRSS56	protease, serine, 56	10	0.3	4.1	-1.3	1.7
22930	RAB3GAP1	RAB3 GTPase activating protein subunit 1 (catalytic)	10	-0.5	10.3	-1.4	-0.2
79690	GAL3ST4	galactose-3-O-sulfotransferase 4	20	0.3	1.38	-0.3	2
10427	SEC24B	SEC24 family member B	10	-0.5	13.2	-1.1	-0.2
7371	UCK2	uridine-cytidine kinase 2	9	-1.7	23	-3	-1.5
57661	PHRF1	PHD and ring finger domains 1	10	0.1	1.32	-1.9	1.4
8295	TRRAP	transformation/transcription domain-associated protein	9	1.2	24	0.6	2
25813	SAMM50	SAMM50 sorting and assembly machinery component	7	1.6	88.9	1.4	2.8
10861	SLC26A1	solute carrier family 26 (anion exchanger), member 1	10	-0.1	0.831	-1.9	1.5
8647	ABCB11	ATP-binding cassette, sub-family B (MDR/TAP), member 11	10	0	0	-1.8	1.7
9039	UBA3	ubiquitin-like modifier activating enzyme 3	9	1.1	36.9	0.8	2
118670	FAM24A	family with sequence similarity 24, member A	10	0.1	0.25	-1.3	2
6301	SARS	seryl-tRNA synthetase	7	1.4	70.8	1.2	2.7
LOC100289187	LOC100289187	N/A	10	-0.1	0.077	-1.7	1.8
727940	RHOXF2B	Rhox homeobox family, member 2B	10	-0.1	0.531	-2	1.5
5770	PTPN1	protein tyrosine phosphatase, non-receptor type 1	10	1	83.8	0.8	1.7
29882	ANAPC2	anaphase promoting complex subunit 2	8	1	18.2	-3	2
26225	ARL5A	ADP-ribosylation factor-like 5A	10	-0.2	2.25	-2	1.1
8412	BCAR3	breast cancer anti-estrogen resistance 3	20	0	0	-1.4	1.7
10959	TMED2	transmembrane emp24 domain trafficking protein 2	10	-0.3	6.64	-1.2	0
10483	SEC23B	Sec23 homolog B (S. cerevisiae)	9	0.2	2.23	-1	2
55610	CCDC132	coiled-coil domain containing 132	10	-0.1	0.556	-1.6	1.8
10342	TFG	TRK-fused gene	10	-0.5	2.61	-2	1.3
112609	MRAP2	melanocortin 2 receptor accessory protein 2	10	0	0	-1.9	1.7
3141	HLCS	holocarboxylase synthetase (biotin-(proprionyl-CoA-carboxylase (ATP-hydrolysing)) ligase)	19	-0.1	0.593	-1.1	1.9
5717	PSMD11	proteasome (prosome, macropain) 26S subunit, non-ATPase, 11	10	-2.5	22.1	-4	-2.2
203068	TUBB	tubulin, beta class I	18	2.6	74.5	2.2	4.6
221079	ARL5B	ADP-ribosylation factor-like 5B	10	-0.1	0.253	-1.9	1.6
50807	ASAP1	ArfGAP with SH3 domain, ankyrin repeat and PH domain 1	10	0	0	-1.7	1.9
65264	UBE2Z	ubiquitin-conjugating enzyme E2Z	10	-3.2	20.9	-6	-3
27340	UTP20	UTP20, small subunit (SSU) processome component, homolog (yeast)	10	-2.2	35	-3.8	-1.9
1639	DCTN1	dynactin 1	10	-0.9	15.4	-1.8	-0.6
6293	VPS52	vacuolar protein sorting 52 homolog (S. cerevisiae)	10	-1.6	29.1	-3	-1.3
6596	HLTF	helicase-like transcription factor	10	0.4	2.35	-0.7	2
1457	CSNK2A1	casein kinase 2, alpha 1 polypeptide	10	-0.3	4.03	-1.9	0.6
9126	SMC3	structural maintenance of chromosomes 3	9	-2.1	12.8	-4	-1.2
6449	SGTA	small glutamine-rich tetratricopeptide repeat (TPR)-containing, alpha	10	0.5	32.2	0.4	0.9
51542	VPS54	vacuolar protein sorting 54 homolog (S. cerevisiae)	10	-2.4	64.3	-3.6	-2.1
23028	KDM1A	lysine (K)-specific demethylase 1A	10	-0.8	24	-1.6	-0.6
7917	BAG6	BCL2-associated athanogene 6	10	1.9	52	1.5	2.9
439	ASNA1	arsA arsenite transporter, ATP-binding, homolog 1 (bacterial)	10	-2.1	85.4	-3.1	-1.8
6181	RPLP2	ribosomal protein, large, P2	9	0.4	8.65	-3.8	2
6165	RPL35A	ribosomal protein L35a	9	2.9	35.1	2.5	4.7
5591	PRKDC	protein kinase, DNA-activated, catalytic polypeptide	10	0.4	4.67	-0.5	2
23526	HMHA1	histocompatibility (minor) HA-1	10	0.1	0.067	-2	1.3
5426	POLE	polymerase (DNA directed), epsilon, catalytic subunit	9	1.7	26.4	-2.5	3
55288	RHOT1	ras homolog family member T1	10	-0.9	2.17	-2	0.6
506	ATP5B	ATP synthase, H+ transporting, mitochondrial F1 complex, beta polypeptide	6	-2	24.8	-4	-1.7
869	CBLN1	cerebellin 1 precursor	10	0.3	3.01	-0.8	2
283171	C11ORF44	chromosome 11 open reading frame 44	10	-1	3.6	-2	0.2
58533	SNX6	sorting nexin 6	10	0.2	4.29	-0.8	1.8
140032	RPS4Y2	ribosomal protein S4, Y-linked 2	10	-0.2	2.29	-2	1.1
116541	MRPL54	mitochondrial ribosomal protein L54	10	1.5	23.3	1.3	3
50999	TMED5	transmembrane emp24 protein transport domain containing 5	10	-0.1	0.651	-2	1.4
58477	SRPRB	signal recognition particle receptor, B subunit	10	-0.3	5.28	-1.7	0.1
10484	SEC23A	Sec23 homolog A (S. cerevisiae)	10	2.1	24.6	1.9	4
80018	NAA25	N(alpha)-acetyltransferase 25, NatB auxiliary subunit	10	1.4	60.4	1.1	2.8
9777	TM9SF4	transmembrane 9 superfamily protein member 4	10	-1.3	63.5	-1.8	-1
498	ATP5A1	ATP synthase, H+ transporting, mitochondrial F1 complex, alpha subunit 1, cardiac muscle	20	0.6	14	0.2	1.5
7026	NR2F2	nuclear receptor subfamily 2, group F, member 2	10	-1.4	7.62	-2	-0.6
56124	PCDHB12	protocadherin beta 12	10	-0.1	0.13	-2	1.5
3190	HNRNPK	heterogeneous nuclear ribonucleoprotein K	9	1.6	81.1	1.2	2.7
60684	TRAPPC11	trafficking protein particle complex 11	10	-2.4	52.1	-4	2.7
5688	PSMA7	proteasome (prosome, macropain) subunit, alpha type, 7	9	3	95.9	2.5	5.2
9457	FHL5	four and a half LIM domains 5	10	-0.2	0.969	-2	1.3
8943	AP3D1	adaptor-related protein complex 3, delta 1 subunit	10	-0.2	0.594	-2	1.2
51096	UTP18	UTP18 small subunit (SSU) processome component homolog (yeast)	10	-0.4	7.18	-1.7	-0.1
51552	RAB14	RAB14, member RAS oncogene family	10	-1.3	88.4	-1.9	-1.2
219988	PATL1	protein associated with topoisomerase II homolog 1 (yeast)	10	0.6	11.8	0.2	1.7
6230	RPS25	ribosomal protein S25	10	-0.2	0.731	-2	1.2
387264	KRTAP5-1	keratin associated protein 5-1	10	-1.7	22.4	-3	-1.4
27439	CECR6	cat eye syndrome chromosome region, candidate 6	10	-0.1	0.687	-2	1.4
6160	RPL31	ribosomal protein L31	7	2.9	84.7	2.5	4.7
23212	RRS1	RRS1 ribosome biogenesis regulator homolog (S. cerevisiae)	7	1.4	56	1.2	2.8
152559	PAQR3	progestin and adipoQ receptor family member III	10	0.2	3.27	-1.1	1.9
81876	RAB1B	RAB1B, member RAS oncogene family	9	-0.7	16	-1.5	-0.4
10498	CARM1	coactivator-associated arginine methyltransferase 1	10	-0.4	1.58	-2	0.9
1137	CHRNA4	cholinergic receptor, nicotinic, alpha 4 (neuronal)	10	-0.8	5.87	-2	-0.3
23071	ERP44	endoplasmic reticulum protein 44	10	-0.3	3.56	-2	0.4
1139	CHRNA7	cholinergic receptor, nicotinic, alpha 7 (neuronal)	10	0.1	0.346	-1.4	2
3692	EIF6	eukaryotic translation initiation factor 6	7	-2.4	28.1	-4	2.2
386682	KRTAP10-3	keratin associated protein 10-3	10	0	0	-1.9	1.7
10642	IGF2BP1	insulin-like growth factor 2 mRNA binding protein 1	10	0	0	-1.7	1.8
642517	AGAP9	ArfGAP with GTPase domain, ankyrin repeat and PH domain 9	10	0	0	-1.5	2
353324	SPATA12	spermatogenesis associated 12	10	-0.1	0.714	-2	1.4
5708	PSMD2	proteasome (prosome, macropain) 26S subunit, non-ATPase, 2	8	-0.8	4.95	-2	0.1
3006	HIST1H1C	histone cluster 1, H1c	10	0.2	1.47	-1.3	2
23168	RTF1	Rtf1, Paf1/RNA polymerase II complex component, homolog (S. cerevisiae)	7	0.7	12.4	0.4	2
9559	VPS26A	vacuolar protein sorting 26 homolog A (S. pombe)	9	0.7	15.1	0.3	1.8
91419	XRCC6BP1	XRCC6 binding protein 1	10	0	0	-1.5	2
25853	DCAF12	DDB1 and CUL4 associated factor 12	10	-0.4	4.75	-1.9	0
150946	GAREML	GRB2 associated, regulator of MAPK1-like	20	0.5	7.27	0	1.4
6996	TDG	thymine-DNA glycosylase	10	0	0	-1.6	1.9
9399	STOML1	stomatin (EPB72)-like 1	10	0.1	0.211	-1.6	1.9
259282	BOD1L1	biorientation of chromosomes in cell division 1-like 1	20	-3.6	17.9	-6.9	-3.4
6721	SREBF2	sterol regulatory element binding transcription factor 2	10	-1	2.8	-2	0.3
64283	ARHGEF28	Rho guanine nucleotide exchange factor (GEF) 28	10	0	0	-1.9	1.7
55717	WDR11	WD repeat domain 11	10	0.2	0.484	-1.6	1.8
3201	HOXA4	homeobox A4	10	0.1	0.421	-1.6	1.9
255488	RNF144B	ring finger protein 144B	10	-0.3	7.7	-1.4	0
8675	STX16	syntaxin 16	10	-0.3	8.89	-1	-0.1
3320	HSP90AA1	heat shock protein 90kDa alpha (cytosolic), class A member 1	10	-0.1	0.627	-2	1.3
169714	QSOX2	quiescin Q6 sulfhydryl oxidase 2	10	-0.8	3.47	-2	0.2
1350	COX7C	cytochrome c oxidase subunit VIIc	10	-0.5	16.5	-1.2	-0.3
2091	FBL	fibrillarin	8	-2.1	48.4	-3.6	-1.8
23119	HIC2	hypermethylated in cancer 2	19	-0.1	1.14	-1.8	1.2
5518	PPP2R1A	protein phosphatase 2, regulatory subunit A, alpha	20	-2	23.6	-4	-1
60559	SPCS3	signal peptidase complex subunit 3 homolog (S. cerevisiae)	20	1.9	27.8	1.6	3.8
400	ARL1	ADP-ribosylation factor-like 1	10	-2	63.8	-3.5	-1.6
643641	ZNF862	zinc finger protein 862	10	0.1	0.567	-1.4	2
5707	PSMD1	proteasome (prosome, macropain) 26S subunit, non-ATPase, 1	7	-1	19.4	-1.9	-0.7
5709	PSMD3	proteasome (prosome, macropain) 26S subunit, non-ATPase, 3	9	1.6	57.5	1.1	2.7
10992	SF3B2	splicing factor 3b, subunit 2, 145kDa	9	2.4	80.6	2.1	3.9
25879	DCAF13	DDB1 and CUL4 associated factor 13	10	-1.3	23.2	-2	-1.1
5862	RAB2A	RAB2A, member RAS oncogene family	10	-0.8	43.2	-1.3	-0.6
10036	CHAF1A	chromatin assembly factor 1, subunit A (p150)	10	2.2	42.4	1.9	3.9
4170	MCL1	myeloid cell leukemia 1	10	-0.2	3.2	-2	0.8
6240	RRM1	ribonucleotide reductase M1	6	-2.8	38.9	-5	3.3
79979	TRMT2B	tRNA methyltransferase 2 homolog B (S. cerevisiae)	10	-0.1	0.0155	-1.8	1.7
8989	TRPA1	transient receptor potential cation channel, subfamily A, member 1	10	-0.1	1.09	-2	1.3
4605	MYBL2	v-myb avian myeloblastosis viral oncogene homolog-like 2	9	-1.9	50.8	-2.9	-1.6
89866	SEC16B	SEC16 homolog B (S. cerevisiae)	10	-0.7	3.98	-2	0
64224	HERPUD2	HERPUD family member 2	10	0	0	-1.8	1.8
6729	SRP54	signal recognition particle 54kDa	10	-1	57.2	-1.6	-0.7
890	CCNA2	cyclin A2	10	-0.9	2.45	-2	0.3
51693	TRAPPC2L	trafficking protein particle complex 2-like	10	-0.4	1.21	-2	0.9
5885	RAD21	RAD21 homolog (S. pombe)	10	0.7	9.46	-1.5	2
6155	RPL27	ribosomal protein L27	7	-1.5	4.33	-2	0.9
6154	RPL26	ribosomal protein L26	7	0.5	4.75	0	2
6651	SON	SON DNA binding protein	17	-2.1	36.4	-3.6	-1.8
23341	DNAJC16	DnaJ (Hsp40) homolog, subfamily C, member 16	10	0	0	-2	1.5
5861	RAB1A	RAB1A, member RAS oncogene family	10	-1	7.74	-2	-0.3
60481	ELOVL5	ELOVL fatty acid elongase 5	10	-0.4	6.01	-1.8	0.5
2804	GOLGB1	golgin B1	10	-0.2	1.52	-2	1.2
23760	PITPNB	phosphatidylinositol transfer protein, beta	10	0.1	2.03	-1.4	1.9
5704	PSMC4	proteasome (prosome, macropain) 26S subunit, ATPase, 4	6	-0.9	14.2	-1.9	-0.5
5706	PSMC6	proteasome (prosome, macropain) 26S subunit, ATPase, 6	7	1.1	42	0.9	2
9706	ULK2	unc-51 like autophagy activating kinase 2	10	0.1	0.939	-1.7	1.7
1296	COL8A2	collagen, type VIII, alpha 2	10	0	0	-1.9	1.7
51575	ESF1	ESF1, nucleolar pre-rRNA processing protein, homolog (S. cerevisiae)	19	2.3	64.3	1.9	3.7
279	AMY2A	amylase, alpha 2A (pancreatic)	10	0	0	-1.5	2
27430	MAT2B	methionine adenosyltransferase II, beta	20	-0.1	0.00485	-1.7	1.4
8570	KHSRP	KH-type splicing regulatory protein	9	0.6	1	-1	2
4738	NEDD8	neural precursor cell expressed, developmentally down-regulated 8	9	-2	50.7	-3.5	-1.4
84720	PIGO	phosphatidylinositol glycan anchor biosynthesis, class O	10	-0.3	0.653	-2	1.1
7415	VCP	valosin containing protein	7	2.5	61.2	2.1	4.7
55275	VPS53	vacuolar protein sorting 53 homolog (S. cerevisiae)	10	-1.5	58.9	-2.7	-1.3
4247	MGAT2	mannosyl (alpha-1,6-)-glycoprotein beta-1,2-N-acetylglucosaminyltransferase	10	0	0	-1.7	1.8
4248	MGAT3	mannosyl (beta-1,4-)-glycoprotein beta-1,4-N-acetylglucosaminyltransferase	9	0	0	-1.7	1.9
160	AP2A1	adaptor-related protein complex 2, alpha 1 subunit	10	-3	35.3	-6	-2.5
79029	SPATA5L1	spermatogenesis associated 5-like 1	10	-3.4	53.7	-5.8	-3.1
6571	SLC18A2	solute carrier family 18 (vesicular monoamine transporter), member 2	9	0	0	-1.6	2
10297	APC2	adenomatosis polyposis coli 2	19	2.3	30.1	2.1	4
51177	PLEKHO1	pleckstrin homology domain containing, family O member 1	10	-0.1	0.225	-2	1.3
5031	P2RY6	pyrimidinergic receptor P2Y, G-protein coupled, 6	10	0	0	-1.3	2
9554	SEC22B	SEC22 vesicle trafficking protein homolog B (S. cerevisiae) (gene/pseudogene)	9	-3.3	142	-5	-2.9
1056	CEL	carboxyl ester lipase	10	-0.1	0.414	-1.3	2
121665	SPPL3	signal peptide peptidase like 3	10	-0.5	9.51	-1.6	-0.2
338328	GPIHBP1	glycosylphosphatidylinositol anchored high density lipoprotein binding protein 1	10	0	0	-2	1.6
11224	RPL35	ribosomal protein L35	9	0.7	16.5	0.3	1.7
51566	ARMCX3	armadillo repeat containing, X-linked 3	10	0.2	2.37	-1.1	2
23163	GGA3	golgi-associated, gamma adaptin ear containing, ARF binding protein 3	10	-0.6	5.97	-2	0
6156	RPL30	ribosomal protein L30	8	1.2	42.6	0.9	1.9
23469	PHF3	PHD finger protein 3	10	-0.5	3.62	-2	0.1
64746	ACBD3	acyl-CoA binding domain containing 3	10	-1.5	81.5	-2.1	-0.7
8450	CUL4B	cullin 4B	10	0.1	0.219	-1.4	2
10146	G3BP1	GTPase activating protein (SH3 domain) binding protein 1	10	-0.1	0.594	-1.8	1.7
1387	CREBBP	CREB binding protein	10	-0.6	8.37	-1.7	-0.1
55837	EAPP	E2F-associated phosphoprotein	10	0	0	-1.5	2
375	ARF1	ADP-ribosylation factor 1	10	0.1	0.55	-1.5	2
285605	DTWD2	DTW domain containing 2	10	-0.2	1.43	-2	1.3
3609	ILF3	interleukin enhancer binding factor 3, 90kDa	10	-0.7	6.44	-1.9	-0.1
3608	ILF2	interleukin enhancer binding factor 2	7	2.2	31	2	4

## Sheet: Ricin vs Retro,Ricin norm rep 2
#GeneID	Symbol	GeneInfo	Element #	casTLE Effect	casTLE Score	Minimum Effect Estimate	Maximum Effect Estimate
23256	SCFD1	sec1 family domain containing 1	10	3.3	45.1	2.16	5.17
25900	IFFO1	intermediate filament family orphan 1	20	-1.92	21.1	-4	3.12
6185	RPN2	ribophorin II	10	-1.01	9.35	-1.95	-0.49
6599	SMARCC1	SWI/SNF related, matrix associated, actin dependent regulator of chromatin, subfamily c, member 1	9	0.34	0.402	-1.28	2
353324	SPATA12	spermatogenesis associated 12	10	0.39	2.68	-0.99	2
5867	RAB4A	RAB4A, member RAS oncogene family	10	-0.04	0.0169	-2	1.47
4897	NRCAM	neuronal cell adhesion molecule	10	-0.23	1.02	-1.81	1.54
8907	AP1M1	adaptor-related protein complex 1, mu 1 subunit	10	-2.22	30.2	-3.96	-1.67
2939	GSTA2	glutathione S-transferase alpha 2	10	-0.01	0.0012	-1.7	1.78
64130	LIN7B	lin-7 homolog B (C. elegans)	10	-0.87	2.9	-2	0.71
10541	ANP32B	acidic (leucine-rich) nuclear phosphoprotein 32 family, member B	10	1.97	2.14	-0.51	4
4677	NARS	asparaginyl-tRNA synthetase	8	0.33	1.29	-1.73	1.71
11196	SEC23IP	SEC23 interacting protein	10	-0.59	15.4	-1.26	-0.29
56681	SAR1A	secretion associated, Ras related GTPase 1A	10	0	0	-2	1.41
84304	NUDT22	nudix (nucleoside diphosphate linked moiety X)-type motif 22	10	0.55	2.85	-0.46	2
84548	TMEM185A	transmembrane protein 185A	10	0.86	2.31	-0.47	2
90933	TRIM41	tripartite motif containing 41	10	0.25	1.43	-1.25	2
7360	UGP2	UDP-glucose pyrophosphorylase 2	10	-1.72	37	-2.67	-0.63
10972	TMED10	transmembrane emp24-like trafficking protein 10 (yeast)	9	-1.69	11.8	-3	-1.03
10075	HUWE1	HECT, UBA and WWE domain containing 1, E3 ubiquitin protein ligase	10	-1.4	8.09	-2.87	-0.3
55015	PRPF39	pre-mRNA processing factor 39	9	-2.33	66.1	-3.7	-1.65
51386	EIF3L	eukaryotic translation initiation factor 3, subunit L	10	1.07	20.3	0.68	1.89
8667	EIF3H	eukaryotic translation initiation factor 3, subunit H	9	-3.52	22	-7	3
54808	DYM	dymeclin	9	0.36	1.43	-1.09	2
8661	EIF3A	eukaryotic translation initiation factor 3, subunit A	7	-2.19	37.9	-3.86	-1.62
285855	RPL7L1	ribosomal protein L7-like 1	10	1.09	4.19	0	2
8664	EIF3D	eukaryotic translation initiation factor 3, subunit D	5	-2.97	24.3	-5	-2.58
5511	PPP1R8	protein phosphatase 1, regulatory subunit 8	10	2.51	13.5	-0.22	5
8665	EIF3F	eukaryotic translation initiation factor 3, subunit F	8	-0.9	1.81	-2	0.9
116541	MRPL54	mitochondrial ribosomal protein L54	10	-0.25	1.85	-2	0.98
2800	GOLGA1	golgin A1	10	-1	3.46	-2	0.13
149699	GTSF1L	gametocyte specific factor 1-like	10	-0.25	1.1	-2	1.23
51258	MRPL51	mitochondrial ribosomal protein L51	9	-4.26	34.9	-7.52	-3.6
124245	ZC3H18	zinc finger CCCH-type containing 18	10	1.7	10.7	0.97	3
55244	SLC47A1	solute carrier family 47 (multidrug and toxin extrusion), member 1	10	0	0	-1.65	1.86
79822	ARHGAP28	Rho GTPase activating protein 28	10	-0.49	2	-2	0.99
166614	DCLK2	doublecortin-like kinase 2	10	1.55	12.9	0.94	3
84189	SLITRK6	SLIT and NTRK-like family, member 6	10	-0.06	0.0611	-1.87	1.59
1660	DHX9	DEAH (Asp-Glu-Ala-His) box helicase 9	10	-0.69	5.95	-2	1.41
361	AQP4	aquaporin 4	10	0.29	1.39	-1.25	1.98
283870	BRICD5	BRICHOS domain containing 5	10	-0.99	4.61	-2	-0.07
5868	RAB5A	RAB5A, member RAS oncogene family	10	-0.02	0.00399	-1.89	1.58
8653	DDX3Y	DEAD (Asp-Glu-Ala-Asp) box helicase 3, Y-linked	10	0.14	0.174	-1.28	2
10492	SYNCRIP	synaptotagmin binding, cytoplasmic RNA interacting protein	10	0.28	0.558	-1.3	2
83548	COG3	component of oligomeric golgi complex 3	7	2.21	75.8	1.5	3.58
2134	EXTL1	exostosin-like glycosyltransferase 1	10	-0.23	1.01	-1.91	1.41
25839	COG4	component of oligomeric golgi complex 4	10	2.31	18.2	1.6	4
147199	SCGB1C1	secretoglobin, family 1C, member 1	10	-0.09	0.181	-2	1.35
27333	GOLIM4	golgi integral membrane protein 4	10	0.62	13.2	0.24	1.37
10802	SEC24A	SEC24 family member A	10	-0.58	7.22	-1.56	-0.08
25818	KLK5	kallikrein-related peptidase 5	10	-0.24	0.937	-2	1.25
9632	SEC24C	SEC24 family member C	10	-0.71	13.7	-1.67	-0.39
10427	SEC24B	SEC24 family member B	10	-0.3	1.41	-2	1.02
5700	PSMC1	proteasome (prosome, macropain) 26S subunit, ATPase, 1	7	-2.35	65.9	-3.75	-1.76
55737	VPS35	vacuolar protein sorting 35 homolog (S. cerevisiae)	9	-1.68	25.3	-2.88	-0.89
29117	BRD7	bromodomain containing 7	10	0.47	3.28	-0.36	2
9262	STK17B	serine/threonine kinase 17b	9	-0.3	1.62	-1.62	1.75
8563	THOC5	THO complex 5	7	-2.39	32.6	-4	-1.9
23352	UBR4	ubiquitin protein ligase E3 component n-recognin 4	9	1.11	3.67	-0.32	2
22878	TRAPPC8	trafficking protein particle complex 8	10	-0.53	2.76	-1.84	3.68
9465	AKAP7	A kinase (PRKA) anchor protein 7	10	0.92	1.32	-1.08	2
6634	SNRPD3	small nuclear ribonucleoprotein D3 polypeptide 18kDa	5	-3.43	81.4	-6.58	-2.8
5757	PTMA	prothymosin, alpha	10	0	0	-1.67	1.83
6194	RPS6	ribosomal protein S6	8	-4.37	29.3	-7.75	-3.84
1981	EIF4G1	eukaryotic translation initiation factor 4 gamma, 1	9	-1.22	27	-2.17	-0.67
6399	TRAPPC2	trafficking protein particle complex 2	10	0.11	0.539	-1.33	2
126003	TRAPPC5	trafficking protein particle complex 5	10	0.06	0.0423	-1.67	1.8
10142	AKAP9	A kinase (PRKA) anchor protein 9	10	0.81	13.1	0.34	1.74
372	ARCN1	archain 1	2	-0.89	4.35	-2	0.78
5694	PSMB6	proteasome (prosome, macropain) subunit, beta type, 6	17	-3.76	70.7	-6.62	-3.38
9054	NFS1	NFS1 cysteine desulfurase	9	1.71	10.5	0.95	3
55163	PNPO	pyridoxamine 5'-phosphate oxidase	10	0	0	-1.9	1.65
1315	COPB1	coatomer protein complex, subunit beta 1	5	2.84	18.7	2.27	4.94
10290	SPEG	SPEG complex locus	20	0.15	0.626	-2	1.33
9276	COPB2	coatomer protein complex, subunit beta 2 (beta prime)	6	-1.25	9.58	-2	-0.67
4904	YBX1	Y box binding protein 1	10	0.03	0.0192	-1.84	1.61
118670	FAM24A	family with sequence similarity 24, member A	10	0.05	0.0381	-1.64	1.82
440270	GOLGA8B	golgin A8 family, member B	10	0.14	0.249	-1.84	1.56
100129520	LOC100129520	testis expressed sequence 13-like	10	0.96	2.35	-0.45	2
196415	C12ORF77	chromosome 12 open reading frame 77	10	0.11	0.0666	-1.35	2
55806	HR	hair growth associated	19	1.61	14.5	1.03	3
6129	RPL7	ribosomal protein L7	10	-2.78	24.3	-4.97	-2.26
6124	RPL4	ribosomal protein L4	8	1.62	30.2	-3.56	3
51495	PTPLAD1	protein tyrosine phosphatase-like A domain containing 1	10	-0.11	0.12	-2	1.4
1984	EIF5A	eukaryotic translation initiation factor 5A	9	0.52	5.09	-1.71	2
81493	SYNC	syncoilin, intermediate filament protein	10	1.31	7.26	0.46	2
51138	COPS4	COP9 signalosome subunit 4	10	-1.54	20.7	-2.79	-1.14
139324	HDX	highly divergent homeobox	10	-0.18	0.461	-2	1.19
221091	LRRN4CL	LRRN4 C-terminal like	10	-0.03	0.0204	-2	1.5
1314	COPA	coatomer protein complex, subunit alpha	8	-2.07	23.9	-4	-1.58
80218	NAA50	N(alpha)-acetyltransferase 50, NatE catalytic subunit	10	-1.19	3.75	-2	0.94
9782	MATR3	matrin 3	10	0.59	3.99	-0.2	2
506	ATP5B	ATP synthase, H+ transporting, mitochondrial F1 complex, beta polypeptide	5	-3.24	91.8	-5.58	-2.76
9919	SEC16A	SEC16 homolog A (S. cerevisiae)	10	-0.39	5.2	-1.79	0.63
89866	SEC16B	SEC16 homolog B (S. cerevisiae)	10	0	0	-1.68	1.82
51430	SUCO	SUN domain containing ossification factor	10	-0.62	6.51	-1.88	-0.06
55504	TNFRSF19	tumor necrosis factor receptor superfamily, member 19	20	0	0	-1.8	1.41
85446	ZFHX2	zinc finger homeobox 2	20	-5.16	17	-9.83	-4.81
55699	IARS2	isoleucyl-tRNA synthetase 2, mitochondrial	6	-1.31	9.27	-2	1.51
23160	WDR43	WD repeat domain 43	6	-1.14	4.34	-2	1.64
8694	DGAT1	diacylglycerol O-acyltransferase 1	10	0.16	0.528	-2	1.38
7203	CCT3	chaperonin containing TCP1, subunit 3 (gamma)	8	-2.18	27.9	-4	-1.55
6484	ST3GAL4	ST3 beta-galactoside alpha-2,3-sialyltransferase 4	10	2.25	37.5	0.96	3.5
100132146	LOC100132146	uncharacterized LOC100132146	10	0	0	-1.79	1.73
10575	CCT4	chaperonin containing TCP1, subunit 4 (delta)	8	-1.67	21	-2.94	-1.18
7272	TTK	TTK protein kinase	6	2.46	43.4	1.99	4.66
84283	TMEM79	transmembrane protein 79	10	0.27	1.16	-1.09	2
2762	GMDS	GDP-mannose 4,6-dehydratase	10	-0.77	22.9	-1.4	-0.44
10291	SF3A1	splicing factor 3a, subunit 1, 120kDa	16	0.85	11.3	-2.64	2
59272	ACE2	angiotensin I converting enzyme 2	10	0	0	-1.67	1.87
2683	B4GALT1	UDP-Gal:betaGlcNAc beta 1,4- galactosyltransferase, polypeptide 1	10	-0.58	9.43	-1.48	-0.16
6836	SURF4	surfeit 4	9	-0.38	0.975	-1.88	1.44
10885	WDR3	WD repeat domain 3	8	1.61	42.2	1.11	2.62
2302	FOXJ1	forkhead box J1	10	-0.18	0.614	-2	1.35
23277	CLUH	clustered mitochondria (cluA/CLU1) homolog	10	1.19	9.51	0.59	2
646960	PRSS56	protease, serine, 56	10	-0.13	0.286	-1.98	1.45
22930	RAB3GAP1	RAB3 GTPase activating protein subunit 1 (catalytic)	10	0.49	6.64	0.09	1.76
7371	UCK2	uridine-cytidine kinase 2	8	0	0	-2	1.44
57661	PHRF1	PHD and ring finger domains 1	10	-0.09	0.156	-1.73	1.7
8295	TRRAP	transformation/transcription domain-associated protein	8	-0.37	1.55	-2	1.24
25813	SAMM50	SAMM50 sorting and assembly machinery component	7	-3.14	36	-5.79	-2.55
10861	SLC26A1	solute carrier family 26 (anion exchanger), member 1	10	0.45	4.33	-0.57	1.94
8647	ABCB11	ATP-binding cassette, sub-family B (MDR/TAP), member 11	10	0.12	0.314	-1.4	2
9039	UBA3	ubiquitin-like modifier activating enzyme 3	9	-1.99	32.1	-3.94	-1.1
5885	RAD21	RAD21 homolog (S. pombe)	7	1.44	24.6	0.96	2.78
6301	SARS	seryl-tRNA synthetase	7	-1.69	26.3	-2.91	-1.07
LOC100289187	LOC100289187	N/A	10	0.08	0.134	-1.65	1.78
727940	RHOXF2B	Rhox homeobox family, member 2B	10	0	0	-1.65	1.83
5770	PTPN1	protein tyrosine phosphatase, non-receptor type 1	10	-4.79	55.3	-8.23	-4.04
29882	ANAPC2	anaphase promoting complex subunit 2	9	-1.34	15.8	-2	-0.93
26225	ARL5A	ADP-ribosylation factor-like 5A	10	0	0	-1.87	1.65
8412	BCAR3	breast cancer anti-estrogen resistance 3	20	0.2	0.552	-0.9	1.93
10959	TMED2	transmembrane emp24 domain trafficking protein 2	10	-0.48	2.72	-2	0.81
23119	HIC2	hypermethylated in cancer 2	20	0.16	0.269	-1.95	1.08
55610	CCDC132	coiled-coil domain containing 132	10	0.29	1.12	-1.13	2
10342	TFG	TRK-fused gene	10	0.65	8.42	0.23	1.73
112609	MRAP2	melanocortin 2 receptor accessory protein 2	10	-0.16	0.259	-1.95	1.44
3141	HLCS	holocarboxylase synthetase (biotin-(proprionyl-CoA-carboxylase (ATP-hydrolysing)) ligase)	19	0.07	0.31	-1.62	1.53
5717	PSMD11	proteasome (prosome, macropain) 26S subunit, non-ATPase, 11	10	2.29	17.4	1	4
203068	TUBB	tubulin, beta class I	16	-1.97	32	-3.65	-0.86
221079	ARL5B	ADP-ribosylation factor-like 5B	10	-0.2	0.19	-2	1.33
50807	ASAP1	ArfGAP with SH3 domain, ankyrin repeat and PH domain 1	10	0.36	2.23	-1.29	1.94
60481	ELOVL5	ELOVL fatty acid elongase 5	10	-0.96	4.58	-2	0.33
27340	UTP20	UTP20, small subunit (SSU) processome component, homolog (yeast)	10	-3.09	36.6	-5.56	-2.29
1639	DCTN1	dynactin 1	10	-0.83	5.09	-2	0.29
6293	VPS52	vacuolar protein sorting 52 homolog (S. cerevisiae)	10	-0.42	3.99	-2	1.74
6596	HLTF	helicase-like transcription factor	10	-0.16	0.418	-2	1.27
1457	CSNK2A1	casein kinase 2, alpha 1 polypeptide	10	0.36	2.8	-0.61	2
375	ARF1	ADP-ribosylation factor 1	10	-0.23	1.17	-1.39	1.9
6449	SGTA	small glutamine-rich tetratricopeptide repeat (TPR)-containing, alpha	10	-0.83	39.7	-1.42	-0.53
4249	MGAT5	mannosyl (alpha-1,6-)-glycoprotein beta-1,6-N-acetyl-glucosaminyltransferase	10	2.51	28.4	1.19	4.08
23028	KDM1A	lysine (K)-specific demethylase 1A	10	3.02	13.8	2.48	6
7917	BAG6	BCL2-associated athanogene 6	10	-1.77	73.3	-2.68	-1.33
439	ASNA1	arsA arsenite transporter, ATP-binding, homolog 1 (bacterial)	10	2.92	29.5	2.14	5.69
6181	RPLP2	ribosomal protein, large, P2	8	1.84	11.4	-1.32	3
6165	RPL35A	ribosomal protein L35a	7	-3.37	56.3	-5.82	-2.79
5591	PRKDC	protein kinase, DNA-activated, catalytic polypeptide	10	-1.32	8.86	-2.87	-0.48
23526	HMHA1	histocompatibility (minor) HA-1	10	0.36	1.56	-1.11	2
5426	POLE	polymerase (DNA directed), epsilon, catalytic subunit	10	-2.23	53.6	-3.79	-1.75
55288	RHOT1	ras homolog family member T1	10	0.31	2.18	-0.93	2
63035	BCORL1	BCL6 corepressor-like 1	10	0.8	9.83	0.35	1.78
7026	NR2F2	nuclear receptor subfamily 2, group F, member 2	10	2.12	4.39	0.1	4
283171	C11ORF44	chromosome 11 open reading frame 44	10	0.29	2.01	-1.84	1.47
58533	SNX6	sorting nexin 6	10	0.65	2.81	-0.81	2
140032	RPS4Y2	ribosomal protein S4, Y-linked 2	10	0.31	2.77	-0.88	2
3326	HSP90AB1	heat shock protein 90kDa alpha (cytosolic), class B member 1	10	0.24	1.78	-1.19	2
50999	TMED5	transmembrane emp24 protein transport domain containing 5	10	-0.05	0.0484	-2	1.37
58477	SRPRB	signal recognition particle receptor, B subunit	9	-0.14	0.506	-2	1.32
10484	SEC23A	Sec23 homolog A (S. cerevisiae)	10	-2.26	35.6	-3.78	-1.52
10483	SEC23B	Sec23 homolog B (S. cerevisiae)	10	-1.02	36.8	-1.67	-0.68
9777	TM9SF4	transmembrane 9 superfamily protein member 4	9	0.71	21.1	0.39	1.43
498	ATP5A1	ATP synthase, H+ transporting, mitochondrial F1 complex, alpha subunit 1, cardiac muscle	20	-2.9	34.3	-4.93	-2.33
869	CBLN1	cerebellin 1 precursor	10	-0.35	2.2	-2	0.52
56124	PCDHB12	protocadherin beta 12	10	0.28	2.69	-0.8	2
3190	HNRNPK	heterogeneous nuclear ribonucleoprotein K	10	-1.27	29.2	-1.92	-0.97
60684	TRAPPC11	trafficking protein particle complex 11	9	-3.47	22.1	-6	-3.11
5688	PSMA7	proteasome (prosome, macropain) subunit, alpha type, 7	10	-2.98	96.2	-4.84	-2.15
9457	FHL5	four and a half LIM domains 5	10	0	0	-1.8	1.69
8943	AP3D1	adaptor-related protein complex 3, delta 1 subunit	10	0.72	1.23	-0.91	2
51096	UTP18	UTP18 small subunit (SSU) processome component homolog (yeast)	10	0.44	5.41	-0.83	1.72
51552	RAB14	RAB14, member RAS oncogene family	10	0.61	14.1	0.29	1.37
219988	PATL1	protein associated with topoisomerase II homolog 1 (yeast)	10	1.07	14.7	0.58	1.87
6230	RPS25	ribosomal protein S25	10	0.05	0.0493	-1.45	2
387264	KRTAP5-1	keratin associated protein 5-1	10	-0.45	1.95	-2	0.83
27439	CECR6	cat eye syndrome chromosome region, candidate 6	10	0.13	0.34	-1.42	2
6160	RPL31	ribosomal protein L31	4	-1	12.2	-2	-0.66
5861	RAB1A	RAB1A, member RAS oncogene family	10	-0.18	1.4	-1.08	2
152559	PAQR3	progestin and adipoQ receptor family member III	10	-0.32	0.884	-2	1.24
81876	RAB1B	RAB1B, member RAS oncogene family	9	-1.18	1.66	-2	0.88
10498	CARM1	coactivator-associated arginine methyltransferase 1	10	-0.26	1.04	-2	1.21
1137	CHRNA4	cholinergic receptor, nicotinic, alpha 4 (neuronal)	9	2.57	5.91	2.03	5
23071	ERP44	endoplasmic reticulum protein 44	10	-0.5	10.6	-1.18	-0.16
56850	GRIPAP1	GRIP1 associated protein 1	10	-0.47	6.67	-1.6	0
3692	EIF6	eukaryotic translation initiation factor 6	4	1.83	31	1.45	2.98
386682	KRTAP10-3	keratin associated protein 10-3	10	-0.03	0.0298	-1.86	1.63
10642	IGF2BP1	insulin-like growth factor 2 mRNA binding protein 1	10	-0.29	2.26	-2	0.9
642517	AGAP9	ArfGAP with GTPase domain, ankyrin repeat and PH domain 9	10	-0.04	0.0295	-1.63	1.83
27095	TRAPPC3	trafficking protein particle complex 3	10	-0.09	0.0931	-1.65	1.81
5708	PSMD2	proteasome (prosome, macropain) 26S subunit, non-ATPase, 2	8	3.03	15.3	2.52	5.93
3006	HIST1H1C	histone cluster 1, H1c	10	-0.18	0.404	-1.54	1.85
23168	RTF1	Rtf1, Paf1/RNA polymerase II complex component, homolog (S. cerevisiae)	7	1.88	28.5	1.42	2.96
9559	VPS26A	vacuolar protein sorting 26 homolog A (S. pombe)	9	-0.72	2.62	-2	1.38
91419	XRCC6BP1	XRCC6 binding protein 1	10	-0.1	0.0241	-2	1.43
5862	RAB2A	RAB2A, member RAS oncogene family	10	0.23	0.48	-1.39	1.97
150946	GAREML	GRB2 associated, regulator of MAPK1-like	20	-0.17	1.01	-0.82	1.98
6996	TDG	thymine-DNA glycosylase	10	0.04	0.041	-2	1.36
9399	STOML1	stomatin (EPB72)-like 1	10	0.18	0.673	-1.31	2
259282	BOD1L1	biorientation of chromosomes in cell division 1-like 1	20	-0.71	4.67	-2	4
6721	SREBF2	sterol regulatory element binding transcription factor 2	10	-0.1	0.157	-1.56	1.91
64283	ARHGEF28	Rho guanine nucleotide exchange factor (GEF) 28	10	0.24	0.336	-1.3	2
55717	WDR11	WD repeat domain 11	10	2.08	28.2	0.99	3.33
3201	HOXA4	homeobox A4	10	-0.27	1.41	-2	1.09
255488	RNF144B	ring finger protein 144B	10	0.41	1.89	-1.05	2
8675	STX16	syntaxin 16	10	0.02	0.00351	-1.65	1.83
3320	HSP90AA1	heat shock protein 90kDa alpha (cytosolic), class A member 1	10	0.04	0.0646	-1.52	1.99
169714	QSOX2	quiescin Q6 sulfhydryl oxidase 2	10	-0.65	4.94	-1.95	-0.03
9126	SMC3	structural maintenance of chromosomes 3	8	3.56	39.6	2.96	6.74
1350	COX7C	cytochrome c oxidase subunit VIIc	9	1.82	15.6	1.47	3
2091	FBL	fibrillarin	6	2.41	26.4	1.83	4
80018	NAA25	N(alpha)-acetyltransferase 25, NatB auxiliary subunit	9	2.36	66	1.67	3.78
5518	PPP2R1A	protein phosphatase 2, regulatory subunit A, alpha	20	1.56	18.2	-1.81	3
60559	SPCS3	signal peptidase complex subunit 3 homolog (S. cerevisiae)	19	-0.4	6.11	-1.45	1.16
400	ARL1	ADP-ribosylation factor-like 1	9	1.86	10.6	-1.66	3
643641	ZNF862	zinc finger protein 862	10	-0.09	0.175	-2	1.41
5707	PSMD1	proteasome (prosome, macropain) 26S subunit, non-ATPase, 1	7	2.86	7.06	2.17	5
5709	PSMD3	proteasome (prosome, macropain) 26S subunit, non-ATPase, 3	8	-2.6	30.5	-4.86	-1.96
10992	SF3B2	splicing factor 3b, subunit 2, 145kDa	8	-2.72	58.2	-4.61	-1.93
25879	DCAF13	DDB1 and CUL4 associated factor 13	9	-2.89	25.9	-4.98	-2.42
25853	DCAF12	DDB1 and CUL4 associated factor 12	10	0.14	0.234	-1.32	2
10036	CHAF1A	chromatin assembly factor 1, subunit A (p150)	10	-2.7	33.1	-4.82	-2
4170	MCL1	myeloid cell leukemia 1	10	0.9	3.75	-0.51	2
6240	RRM1	ribonucleotide reductase M1	7	-3.15	49.9	-5.83	-2.6
79979	TRMT2B	tRNA methyltransferase 2 homolog B (S. cerevisiae)	10	0.8	0.959	-1.02	2
8989	TRPA1	transient receptor potential cation channel, subfamily A, member 1	10	0.9	0.788	-0.96	2
4605	MYBL2	v-myb avian myeloblastosis viral oncogene homolog-like 2	8	-1.9	41.2	-3.66	-1.36
79690	GAL3ST4	galactose-3-O-sulfotransferase 4	20	-0.36	1.41	-2	0.57
64224	HERPUD2	HERPUD family member 2	10	0	0	-1.86	1.63
6729	SRP54	signal recognition particle 54kDa	10	-0.52	3.13	-2	0.79
890	CCNA2	cyclin A2	10	1.19	45.7	0.8	2.25
51693	TRAPPC2L	trafficking protein particle complex 2-like	10	-0.15	0.44	-2	1.37
6155	RPL27	ribosomal protein L27	7	1.04	2.39	-1.06	2
6154	RPL26	ribosomal protein L26	7	0.45	1.33	-1.43	2
6651	SON	SON DNA binding protein	19	4.34	68.3	3.31	6.85
23341	DNAJC16	DnaJ (Hsp40) homolog, subfamily C, member 16	10	0.09	0.111	-1.66	1.8
23212	RRS1	RRS1 ribosome biogenesis regulator homolog (S. cerevisiae)	5	-2.89	23.9	-5	3.72
65264	UBE2Z	ubiquitin-conjugating enzyme E2Z	10	3.44	5.57	0.55	6
2804	GOLGB1	golgin B1	10	1.19	4.23	-0.55	2
1139	CHRNA7	cholinergic receptor, nicotinic, alpha 7 (neuronal)	10	0	0	-2	1.48
23760	PITPNB	phosphatidylinositol transfer protein, beta	10	-0.98	3.4	-2	1.13
5704	PSMC4	proteasome (prosome, macropain) 26S subunit, ATPase, 4	4	1.5	17.8	0.96	2.99
5706	PSMC6	proteasome (prosome, macropain) 26S subunit, ATPase, 6	4	-0.62	4.37	-2	0.65
9706	ULK2	unc-51 like autophagy activating kinase 2	10	0.35	0.746	-1.33	1.98
1296	COL8A2	collagen, type VIII, alpha 2	10	0.25	1.43	-1.73	1.63
51575	ESF1	ESF1, nucleolar pre-rRNA processing protein, homolog (S. cerevisiae)	17	-2.21	30.3	-3.91	-1.58
279	AMY2A	amylase, alpha 2A (pancreatic)	10	-0.03	0.0165	-2	1.37
27430	MAT2B	methionine adenosyltransferase II, beta	20	1.61	14.3	0.5	2.93
8570	KHSRP	KH-type splicing regulatory protein	9	-0.22	1.31	-2	1.28
4738	NEDD8	neural precursor cell expressed, developmentally down-regulated 8	7	1.83	6.01	0.59	3
84720	PIGO	phosphatidylinositol glycan anchor biosynthesis, class O	10	0.49	0.777	-1.18	2
7415	VCP	valosin containing protein	5	0.8	4.36	-0.22	2
55275	VPS53	vacuolar protein sorting 53 homolog (S. cerevisiae)	10	-1.03	3.07	-2	1.53
4247	MGAT2	mannosyl (alpha-1,6-)-glycoprotein beta-1,2-N-acetylglucosaminyltransferase	10	-0.32	3.98	-1.96	0.43
4248	MGAT3	mannosyl (beta-1,4-)-glycoprotein beta-1,4-N-acetylglucosaminyltransferase	9	0.93	2.62	-0.39	2
160	AP2A1	adaptor-related protein complex 2, alpha 1 subunit	10	5.31	44.4	4.72	9.49
79029	SPATA5L1	spermatogenesis associated 5-like 1	10	2.95	46	1.89	4.98
6571	SLC18A2	solute carrier family 18 (vesicular monoamine transporter), member 2	9	0.04	0.0362	-1.8	1.71
10297	APC2	adenomatosis polyposis coli 2	19	-1.43	0.886	-3	0.12
51177	PLEKHO1	pleckstrin homology domain containing, family O member 1	10	0.25	0.747	-1.32	2
5031	P2RY6	pyrimidinergic receptor P2Y, G-protein coupled, 6	10	-1.21	1.56	-2	0.85
9554	SEC22B	SEC22 vesicle trafficking protein homolog B (S. cerevisiae) (gene/pseudogene)	8	-3.32	31.1	-5.83	-2.74
1056	CEL	carboxyl ester lipase	10	-1.15	1.58	-2	0.95
121665	SPPL3	signal peptide peptidase like 3	10	-0.71	20.1	-1.32	-0.36
338328	GPIHBP1	glycosylphosphatidylinositol anchored high density lipoprotein binding protein 1	10	-0.02	0.00764	-1.94	1.55
11224	RPL35	ribosomal protein L35	9	-0.9	6.22	-2	1.69
51566	ARMCX3	armadillo repeat containing, X-linked 3	10	-1.48	3.22	-3	0.14
23163	GGA3	golgi-associated, gamma adaptin ear containing, ARF binding protein 3	10	1.02	0.728	-1.03	2
6156	RPL30	ribosomal protein L30	6	-3.91	22.6	-6.98	-3.59
23469	PHF3	PHD finger protein 3	10	-0.44	0.896	-2	1.11
64746	ACBD3	acyl-CoA binding domain containing 3	10	0.97	40.5	0.64	1.62
8450	CUL4B	cullin 4B	10	-0.4	2.18	-2	0.8
10146	G3BP1	GTPase activating protein (SH3 domain) binding protein 1	10	0.1	0.174	-1.43	2
1387	CREBBP	CREB binding protein	10	-0.69	1.48	-1.93	1.75
55837	EAPP	E2F-associated phosphoprotein	10	0.9	7.36	0.39	1.97
51542	VPS54	vacuolar protein sorting 54 homolog (S. cerevisiae)	10	-1.72	29.6	-2.9	-0.98
285605	DTWD2	DTW domain containing 2	10	0.3	0.955	-1.09	2
3609	ILF3	interleukin enhancer binding factor 3, 90kDa	10	0.37	1.89	-0.74	2
3608	ILF2	interleukin enhancer binding factor 2	7	-2.23	36.1	-3.88	-1.53

## Sheet: Ricin vs Retro,Ricin norm rep 1
#GeneID	Symbol	GeneInfo	Element #	casTLE Effect	casTLE Score	Minimum Effect Estimate	Maximum Effect Estimate
23256	SCFD1	sec1 family domain containing 1	8	2.22	31.5	-1.28	4
25900	IFFO1	intermediate filament family orphan 1	20	-1.58	5.4	-3	-0.54
6185	RPN2	ribophorin II	10	-1.01	34.1	-1.65	-0.62
64130	LIN7B	lin-7 homolog B (C. elegans)	10	-0.12	0.534	-1.25	2
5867	RAB4A	RAB4A, member RAS oncogene family	10	-0.1	0.185	-2	1.46
4897	NRCAM	neuronal cell adhesion molecule	10	0.31	1.9	-1.12	2
8907	AP1M1	adaptor-related protein complex 1, mu 1 subunit	10	1.21	17.4	0.76	1.99
2939	GSTA2	glutathione S-transferase alpha 2	10	0.06	0.0511	-1.42	2
6599	SMARCC1	SWI/SNF related, matrix associated, actin dependent regulator of chromatin, subfamily c, member 1	9	0.29	0.533	-1.26	2
10541	ANP32B	acidic (leucine-rich) nuclear phosphoprotein 32 family, member B	10	0.44	1.58	-0.92	2
4677	NARS	asparaginyl-tRNA synthetase	9	-3.23	32.7	-5.86	-2.7
11196	SEC23IP	SEC23 interacting protein	10	-0.35	4.16	-1.95	0.27
56681	SAR1A	secretion associated, Ras related GTPase 1A	10	0	0	-2	1.49
84304	NUDT22	nudix (nucleoside diphosphate linked moiety X)-type motif 22	10	-0.22	0.861	-2	1.22
84548	TMEM185A	transmembrane protein 185A	10	0	0	-2	1.43
90933	TRIM41	tripartite motif containing 41	10	0.11	0.394	-1.39	2
7360	UGP2	UDP-glucose pyrophosphorylase 2	10	1.85	4.42	-1.02	3
10972	TMED10	transmembrane emp24-like trafficking protein 10 (yeast)	9	-1.29	27.8	-2.41	-0.73
10075	HUWE1	HECT, UBA and WWE domain containing 1, E3 ubiquitin protein ligase	10	-0.75	6.92	-2	-0.14
55015	PRPF39	pre-mRNA processing factor 39	10	1.36	10.4	0.59	2.88
51386	EIF3L	eukaryotic translation initiation factor 3, subunit L	10	-0.26	0.736	-1.31	2
8667	EIF3H	eukaryotic translation initiation factor 3, subunit H	9	3.17	55.3	2.6	5.64
54808	DYM	dymeclin	9	0.79	4.48	0.08	2
8661	EIF3A	eukaryotic translation initiation factor 3, subunit A	5	-1.55	9.73	-3	1.01
285855	RPL7L1	ribosomal protein L7-like 1	10	1.56	15.3	1.09	2.85
8664	EIF3D	eukaryotic translation initiation factor 3, subunit D	7	2.53	40.3	1.92	4.61
5511	PPP1R8	protein phosphatase 1, regulatory subunit 8	10	-1.64	15.9	-2.74	-0.65
8665	EIF3F	eukaryotic translation initiation factor 3, subunit F	8	2.1	15.5	-3.08	4
3326	HSP90AB1	heat shock protein 90kDa alpha (cytosolic), class B member 1	10	0.35	3.05	-0.59	2
2800	GOLGA1	golgin A1	10	-0.02	0.0231	-1.93	1.58
149699	GTSF1L	gametocyte specific factor 1-like	10	-0.59	2.82	-2	0.49
51258	MRPL51	mitochondrial ribosomal protein L51	7	-1.44	15.8	-3	1.17
124245	ZC3H18	zinc finger CCCH-type containing 18	9	-0.72	13.4	-1.69	-0.33
55244	SLC47A1	solute carrier family 47 (multidrug and toxin extrusion), member 1	10	0.28	0.895	-1.26	2
79822	ARHGAP28	Rho GTPase activating protein 28	10	0	0	-1.85	1.66
84189	SLITRK6	SLIT and NTRK-like family, member 6	10	-0.03	0.00827	-1.46	1.97
1660	DHX9	DEAH (Asp-Glu-Ala-His) box helicase 9	9	0.74	6.62	0.17	2
361	AQP4	aquaporin 4	10	0	0	-1.86	1.67
283870	BRICD5	BRICHOS domain containing 5	10	-1.49	11.5	-2.88	-0.72
5868	RAB5A	RAB5A, member RAS oncogene family	10	-0.86	1.19	-2	0.99
8653	DDX3Y	DEAD (Asp-Glu-Ala-Asp) box helicase 3, Y-linked	10	0.18	0.618	-1.5	1.89
10492	SYNCRIP	synaptotagmin binding, cytoplasmic RNA interacting protein	9	0.28	1.08	-1.25	2
83548	COG3	component of oligomeric golgi complex 3	6	-1.6	15.9	-2.93	-1.15
2134	EXTL1	exostosin-like glycosyltransferase 1	10	0.64	6.66	0.12	1.79
56850	GRIPAP1	GRIP1 associated protein 1	10	0.22	0.854	-1.26	2
25839	COG4	component of oligomeric golgi complex 4	10	3.21	22.8	2.73	5.91
147199	SCGB1C1	secretoglobin, family 1C, member 1	10	-0.17	0.427	-2	1.37
27333	GOLIM4	golgi integral membrane protein 4	10	0.58	12.1	0.18	1.27
10802	SEC24A	SEC24 family member A	10	-0.36	4.54	-1.85	0.27
25818	KLK5	kallikrein-related peptidase 5	10	0	0	-1.73	1.8
9632	SEC24C	SEC24 family member C	10	-0.76	17.9	-1.51	-0.35
5700	PSMC1	proteasome (prosome, macropain) 26S subunit, ATPase, 1	6	-4.01	24	-8	4.52
55737	VPS35	vacuolar protein sorting 35 homolog (S. cerevisiae)	8	-2.86	62.2	-4.56	-2.23
29117	BRD7	bromodomain containing 7	10	0.41	3.4	-0.3	2
9262	STK17B	serine/threonine kinase 17b	9	0.25	1.28	-1.26	2
8563	THOC5	THO complex 5	7	-1.24	5.35	-2	1.03
23352	UBR4	ubiquitin protein ligase E3 component n-recognin 4	9	0.62	0.689	-1.35	2
22878	TRAPPC8	trafficking protein particle complex 8	10	2.06	14.7	1.51	4
9465	AKAP7	A kinase (PRKA) anchor protein 7	10	0	0	-2	1.4
6634	SNRPD3	small nuclear ribonucleoprotein D3 polypeptide 18kDa	6	-1.68	13.6	-3	-1.29
5757	PTMA	prothymosin, alpha	10	0	0	-1.81	1.68
6194	RPS6	ribosomal protein S6	7	-2.61	32.3	-4.85	-1.99
27095	TRAPPC3	trafficking protein particle complex 3	10	-0.65	2.01	-2	0.92
6399	TRAPPC2	trafficking protein particle complex 2	10	0	0	-1.74	1.8
126003	TRAPPC5	trafficking protein particle complex 5	10	-1.59	7.64	-3	-0.91
10142	AKAP9	A kinase (PRKA) anchor protein 9	10	0.73	14.3	0.32	1.51
372	ARCN1	archain 1	2	-0.32	1.06	-2	1.64
9054	NFS1	NFS1 cysteine desulfurase	9	0.8	3.42	-0.52	2
55163	PNPO	pyridoxamine 5'-phosphate oxidase	10	0	0	-1.83	1.69
1315	COPB1	coatomer protein complex, subunit beta 1	3	0.9	8	-1.81	2
10290	SPEG	SPEG complex locus	20	2.76	19	2.34	5
9276	COPB2	coatomer protein complex, subunit beta 2 (beta prime)	5	-0.93	4.5	-2	0.36
4904	YBX1	Y box binding protein 1	10	-0.7	5.02	-1.95	-0.09
1981	EIF4G1	eukaryotic translation initiation factor 4 gamma, 1	9	-1.88	17.8	-3.64	-1.05
440270	GOLGA8B	golgin A8 family, member B	10	0.29	0.571	-1.19	2
100129520	LOC100129520	testis expressed sequence 13-like	10	-0.07	0.0969	-1.95	1.5
196415	C12ORF77	chromosome 12 open reading frame 77	10	-0.61	2.22	-2	1.76
55806	HR	hair growth associated	20	-0.11	0.937	-1.65	1.82
6129	RPL7	ribosomal protein L7	9	-1.39	18.3	-2.72	-0.78
6124	RPL4	ribosomal protein L4	8	1.77	22.4	-4.72	3
51495	PTPLAD1	protein tyrosine phosphatase-like A domain containing 1	10	-0.27	2.89	-1.94	1.04
1984	EIF5A	eukaryotic translation initiation factor 5A	9	0.62	6.06	0.19	1.99
81493	SYNC	syncoilin, intermediate filament protein	10	0	0	-1.79	1.74
51138	COPS4	COP9 signalosome subunit 4	8	-4.03	32	-7.73	-3.52
139324	HDX	highly divergent homeobox	10	0	0	-1.79	1.71
221091	LRRN4CL	LRRN4 C-terminal like	10	1.19	2.11	-0.66	2
1314	COPA	coatomer protein complex, subunit alpha	8	2.38	32.3	-4.99	4
80218	NAA50	N(alpha)-acetyltransferase 50, NatE catalytic subunit	10	-0.72	9.16	-2	2.66
9782	MATR3	matrin 3	10	0.24	0.447	-1.29	2
63035	BCORL1	BCL6 corepressor-like 1	10	0.7	5.7	-0.73	2
9919	SEC16A	SEC16 homolog A (S. cerevisiae)	10	0.38	2.1	-0.86	2
89866	SEC16B	SEC16 homolog B (S. cerevisiae)	10	0.02	0.00339	-1.5	1.99
51430	SUCO	SUN domain containing ossification factor	10	-0.71	6.85	-1.81	-0.13
55504	TNFRSF19	tumor necrosis factor receptor superfamily, member 19	20	-0.81	2.88	-2	0.04
85446	ZFHX2	zinc finger homeobox 2	19	-0.67	1.77	-2	0.31
55699	IARS2	isoleucyl-tRNA synthetase 2, mitochondrial	6	2.79	29.6	2.31	4.95
23160	WDR43	WD repeat domain 43	6	-3.32	50.3	-5.82	-2.93
8694	DGAT1	diacylglycerol O-acyltransferase 1	10	0.38	3.59	-0.39	2
7203	CCT3	chaperonin containing TCP1, subunit 3 (gamma)	8	5.13	24.9	4.63	9.87
6484	ST3GAL4	ST3 beta-galactoside alpha-2,3-sialyltransferase 4	10	0.9	27.1	0.56	1.65
100132146	LOC100132146	uncharacterized LOC100132146	10	0	0	-1.8	1.72
10575	CCT4	chaperonin containing TCP1, subunit 4 (delta)	7	2.85	43.1	2.22	4.75
10992	SF3B2	splicing factor 3b, subunit 2, 145kDa	8	3.6	38.7	-2.79	7
7272	TTK	TTK protein kinase	8	-1.52	26.4	-2.79	-1.06
84283	TMEM79	transmembrane protein 79	10	-0.71	6.81	-1.89	-0.18
2762	GMDS	GDP-mannose 4,6-dehydratase	10	-0.77	28.8	-1.44	-0.45
10291	SF3A1	splicing factor 3a, subunit 1, 120kDa	17	1.12	21.4	0.62	2.05
59272	ACE2	angiotensin I converting enzyme 2	10	-0.12	0.288	-1.5	1.89
2683	B4GALT1	UDP-Gal:betaGlcNAc beta 1,4- galactosyltransferase, polypeptide 1	10	-0.66	10	-1.49	-0.21
6836	SURF4	surfeit 4	10	0.78	3.45	-0.65	2
10885	WDR3	WD repeat domain 3	8	-2.98	49.7	-5.75	-2.6
2302	FOXJ1	forkhead box J1	10	-0.33	3.44	-1.75	1.38
23277	CLUH	clustered mitochondria (cluA/CLU1) homolog	10	0.31	2.75	-0.57	2
646960	PRSS56	protease, serine, 56	10	-0.69	3.42	-2	0.65
22930	RAB3GAP1	RAB3 GTPase activating protein subunit 1 (catalytic)	10	0.31	1.85	-1.14	2
10427	SEC24B	SEC24 family member B	10	-0.85	8.61	-1.83	-0.26
7371	UCK2	uridine-cytidine kinase 2	9	-2.65	22.6	-5	-2.25
57661	PHRF1	PHD and ring finger domains 1	10	0.71	8.34	-2.65	2
8295	TRRAP	transformation/transcription domain-associated protein	8	1.72	12.8	1.04	3
25813	SAMM50	SAMM50 sorting and assembly machinery component	6	2.94	46.9	2.26	5.45
10861	SLC26A1	solute carrier family 26 (anion exchanger), member 1	10	0.74	0.821	-0.92	2
8647	ABCB11	ATP-binding cassette, sub-family B (MDR/TAP), member 11	10	0	0	-1.68	1.84
9039	UBA3	ubiquitin-like modifier activating enzyme 3	10	1.52	10.3	-1.48	3
118670	FAM24A	family with sequence similarity 24, member A	10	-0.02	0.00882	-1.75	1.74
5694	PSMB6	proteasome (prosome, macropain) subunit, beta type, 6	17	-2.23	31.2	-3.83	-1.63
LOC100289187	LOC100289187	N/A	10	0	0	-1.86	1.69
727940	RHOXF2B	Rhox homeobox family, member 2B	10	0.06	0.0678	-1.63	1.82
5770	PTPN1	protein tyrosine phosphatase, non-receptor type 1	10	2.3	41.3	1.94	3.91
29882	ANAPC2	anaphase promoting complex subunit 2	7	-2.46	23.1	-4.98	-2.07
26225	ARL5A	ADP-ribosylation factor-like 5A	10	-0.29	1.72	-2	1.08
8412	BCAR3	breast cancer anti-estrogen resistance 3	20	0.27	2.76	-0.55	1.78
10959	TMED2	transmembrane emp24 domain trafficking protein 2	10	-0.41	0.96	-2	1.11
80018	NAA25	N(alpha)-acetyltransferase 25, NatB auxiliary subunit	9	-2.15	41.9	-3.64	-1.58
55610	CCDC132	coiled-coil domain containing 132	10	0.25	0.477	-1.24	2
10342	TFG	TRK-fused gene	10	-4.85	21.5	-8.84	-4.44
112609	MRAP2	melanocortin 2 receptor accessory protein 2	10	0.3	1.27	-1.23	2
3141	HLCS	holocarboxylase synthetase (biotin-(proprionyl-CoA-carboxylase (ATP-hydrolysing)) ligase)	19	-0.07	0.0655	-0.83	2
5717	PSMD11	proteasome (prosome, macropain) 26S subunit, non-ATPase, 11	10	2.57	80.8	2.09	4.42
203068	TUBB	tubulin, beta class I	16	-2.26	29.5	-4	-1.4
221079	ARL5B	ADP-ribosylation factor-like 5B	10	-0.4	3.55	-2	0.42
50807	ASAP1	ArfGAP with SH3 domain, ankyrin repeat and PH domain 1	10	0.27	1.37	-1.21	2
65264	UBE2Z	ubiquitin-conjugating enzyme E2Z	10	1.45	20	0.75	2.58
27340	UTP20	UTP20, small subunit (SSU) processome component, homolog (yeast)	9	1.7	17.6	1.37	2.9
1639	DCTN1	dynactin 1	9	0.6	9.42	0.15	1.58
6293	VPS52	vacuolar protein sorting 52 homolog (S. cerevisiae)	10	3.13	21.1	2.76	5.97
6596	HLTF	helicase-like transcription factor	10	0.07	0.116	-1.6	1.85
2091	FBL	fibrillarin	6	2.3	25.2	1.77	4
1457	CSNK2A1	casein kinase 2, alpha 1 polypeptide	10	0.47	3.59	-0.38	2
375	ARF1	ADP-ribosylation factor 1	10	-1.06	3.97	-2	0.05
6449	SGTA	small glutamine-rich tetratricopeptide repeat (TPR)-containing, alpha	10	-0.77	14.3	-1.56	-0.27
4249	MGAT5	mannosyl (alpha-1,6-)-glycoprotein beta-1,6-N-acetyl-glucosaminyltransferase	10	1.95	25.9	1.2	3.5
23028	KDM1A	lysine (K)-specific demethylase 1A	10	-1.23	22	-2.61	-0.73
7917	BAG6	BCL2-associated athanogene 6	9	-1.2	46.8	-1.82	-0.86
439	ASNA1	arsA arsenite transporter, ATP-binding, homolog 1 (bacterial)	10	2.1	35.9	1.53	3.5
6181	RPLP2	ribosomal protein, large, P2	8	-0.9	14.3	-1.88	-0.55
6165	RPL35A	ribosomal protein L35a	8	2.66	37.4	2.04	4.77
5591	PRKDC	protein kinase, DNA-activated, catalytic polypeptide	10	1.15	7.59	-2.13	2
23526	HMHA1	histocompatibility (minor) HA-1	10	0.62	3.24	-0.33	2
5426	POLE	polymerase (DNA directed), epsilon, catalytic subunit	9	1.27	11	0.71	2
55288	RHOT1	ras homolog family member T1	10	-0.12	0.32	-2	1.37
506	ATP5B	ATP synthase, H+ transporting, mitochondrial F1 complex, beta polypeptide	5	-3.97	46.2	-7.72	-3.47
869	CBLN1	cerebellin 1 precursor	10	0	0	-1.53	1.99
283171	C11ORF44	chromosome 11 open reading frame 44	10	-1.69	8.83	-3	-0.94
58533	SNX6	sorting nexin 6	10	-1.71	2.34	-3	0.42
140032	RPS4Y2	ribosomal protein S4, Y-linked 2	10	0	0	-1.87	1.65
116541	MRPL54	mitochondrial ribosomal protein L54	10	-1.55	14.6	-2.89	-1.08
50999	TMED5	transmembrane emp24 protein transport domain containing 5	10	-0.15	0.542	-2	1.37
58477	SRPRB	signal recognition particle receptor, B subunit	10	-2.87	57.4	-4.64	-2.36
10484	SEC23A	Sec23 homolog A (S. cerevisiae)	10	-2.21	25.9	-4	-1.63
10483	SEC23B	Sec23 homolog B (S. cerevisiae)	10	-2.09	49	-3.72	-0.89
9777	TM9SF4	transmembrane 9 superfamily protein member 4	9	1.02	19.1	0.56	1.82
498	ATP5A1	ATP synthase, H+ transporting, mitochondrial F1 complex, alpha subunit 1, cardiac muscle	20	1.46	16.3	0.84	2.78
7026	NR2F2	nuclear receptor subfamily 2, group F, member 2	9	1.88	3.66	-0.84	3
56124	PCDHB12	protocadherin beta 12	10	0.09	0.211	-1.53	1.94
3190	HNRNPK	heterogeneous nuclear ribonucleoprotein K	9	1.72	13.3	0.96	3
60684	TRAPPC11	trafficking protein particle complex 11	8	1.06	31.2	0.76	1.9
5688	PSMA7	proteasome (prosome, macropain) subunit, alpha type, 7	8	-2.23	38.5	-3.9	-1.52
9457	FHL5	four and a half LIM domains 5	10	0	0	-2	1.46
8943	AP3D1	adaptor-related protein complex 3, delta 1 subunit	9	0.33	1.22	-1.72	1.66
51096	UTP18	UTP18 small subunit (SSU) processome component homolog (yeast)	10	-1.89	16.7	-3.68	-1.09
51552	RAB14	RAB14, member RAS oncogene family	10	0.45	6.56	0.03	1.59
219988	PATL1	protein associated with topoisomerase II homolog 1 (yeast)	10	-0.94	15.5	-1.76	-0.4
6230	RPS25	ribosomal protein S25	10	0	0	-1.79	1.7
387264	KRTAP5-1	keratin associated protein 5-1	10	-0.71	3.96	-2	0.86
27439	CECR6	cat eye syndrome chromosome region, candidate 6	10	1.7	3.33	-0.2	3
6160	RPL31	ribosomal protein L31	4	1.27	12.9	0.72	2
23212	RRS1	RRS1 ribosome biogenesis regulator homolog (S. cerevisiae)	4	3.32	32.3	2.84	5.88
152559	PAQR3	progestin and adipoQ receptor family member III	10	-1.25	6.59	-2	-0.46
81876	RAB1B	RAB1B, member RAS oncogene family	9	-0.12	0.4	-1.9	1.57
10498	CARM1	coactivator-associated arginine methyltransferase 1	10	-1.22	4.5	-2	-0.05
1137	CHRNA4	cholinergic receptor, nicotinic, alpha 4 (neuronal)	10	1.45	3.57	-0.31	3
23071	ERP44	endoplasmic reticulum protein 44	10	-0.56	14.6	-1.17	-0.24
1139	CHRNA7	cholinergic receptor, nicotinic, alpha 7 (neuronal)	10	-0.1	0.287	-1.57	1.86
3692	EIF6	eukaryotic translation initiation factor 6	5	1.64	3.28	-0.56	3
386682	KRTAP10-3	keratin associated protein 10-3	10	-0.04	0.0573	-2	1.21
10642	IGF2BP1	insulin-like growth factor 2 mRNA binding protein 1	10	-0.26	2.29	-2	1.01
642517	AGAP9	ArfGAP with GTPase domain, ankyrin repeat and PH domain 9	10	0.42	2.71	-0.6	2
353324	SPATA12	spermatogenesis associated 12	10	-0.14	0.242	-1.22	2
166614	DCLK2	doublecortin-like kinase 2	10	1.52	2.01	-0.58	3
3006	HIST1H1C	histone cluster 1, H1c	10	0.38	2.62	-0.59	2
23168	RTF1	Rtf1, Paf1/RNA polymerase II complex component, homolog (S. cerevisiae)	8	-3.49	14.6	-6.81	-2.98
9559	VPS26A	vacuolar protein sorting 26 homolog A (S. pombe)	9	0	0	-1.65	1.88
91419	XRCC6BP1	XRCC6 binding protein 1	10	-1.36	8.69	-2.92	-0.51
5862	RAB2A	RAB2A, member RAS oncogene family	10	0.43	7.4	0.04	1.47
150946	GAREML	GRB2 associated, regulator of MAPK1-like	20	2.84	20.3	2.36	5
6996	TDG	thymine-DNA glycosylase	10	0	0	-1.65	1.84
9399	STOML1	stomatin (EPB72)-like 1	10	1.19	2.33	-0.88	2
259282	BOD1L1	biorientation of chromosomes in cell division 1-like 1	20	-0.89	12.3	-1.75	-0.37
6721	SREBF2	sterol regulatory element binding transcription factor 2	10	0.46	2.07	-1.09	2
64283	ARHGEF28	Rho guanine nucleotide exchange factor (GEF) 28	10	0.16	0.0932	-1.35	2
55717	WDR11	WD repeat domain 11	10	1.33	19.8	0.88	2.56
3201	HOXA4	homeobox A4	10	-0.11	0.193	-1.8	1.64
255488	RNF144B	ring finger protein 144B	10	0	0	-1.83	1.69
8675	STX16	syntaxin 16	10	-0.24	1.25	-2	1.18
3320	HSP90AA1	heat shock protein 90kDa alpha (cytosolic), class A member 1	10	0	0	-1.7	1.81
169714	QSOX2	quiescin Q6 sulfhydryl oxidase 2	10	-0.48	2.28	-2	0.89
9126	SMC3	structural maintenance of chromosomes 3	7	2.66	38	1.07	5
1350	COX7C	cytochrome c oxidase subunit VIIc	10	2.62	62.9	2.14	4.54
6301	SARS	seryl-tRNA synthetase	6	-1.57	17.8	-2.93	-1.16
23119	HIC2	hypermethylated in cancer 2	20	-0.49	6.13	-1.43	0
5518	PPP2R1A	protein phosphatase 2, regulatory subunit A, alpha	20	0.84	4.39	-1.9	2
60559	SPCS3	signal peptidase complex subunit 3 homolog (S. cerevisiae)	20	-0.48	8.14	-1.76	-0.12
400	ARL1	ADP-ribosylation factor-like 1	9	3.08	45.8	2.19	6
643641	ZNF862	zinc finger protein 862	10	-0.09	0.306	-2	1.41
5707	PSMD1	proteasome (prosome, macropain) 26S subunit, non-ATPase, 1	6	-2.33	23.9	-4	-1.9
5709	PSMD3	proteasome (prosome, macropain) 26S subunit, non-ATPase, 3	8	-1.68	3.39	-3	3.61
5708	PSMD2	proteasome (prosome, macropain) 26S subunit, non-ATPase, 2	9	-1.35	23.6	-2.62	-0.83
25879	DCAF13	DDB1 and CUL4 associated factor 13	9	4.64	47.1	4.13	8.67
25853	DCAF12	DDB1 and CUL4 associated factor 12	10	-0.02	0.0065	-2	1.43
10036	CHAF1A	chromatin assembly factor 1, subunit A (p150)	8	-2.78	43.8	-4.75	-2.05
4170	MCL1	myeloid cell leukemia 1	10	-1.16	13.3	-2	0.1
6240	RRM1	ribonucleotide reductase M1	5	-3.59	35.4	-6.66	-2.97
79979	TRMT2B	tRNA methyltransferase 2 homolog B (S. cerevisiae)	10	-0.26	1.96	-1.84	1.34
8989	TRPA1	transient receptor potential cation channel, subfamily A, member 1	10	-0.04	0.0309	-1.55	1.91
4605	MYBL2	v-myb avian myeloblastosis viral oncogene homolog-like 2	9	-3.25	36.8	-6	3.77
79690	GAL3ST4	galactose-3-O-sulfotransferase 4	20	0	0	-1.73	1.5
64224	HERPUD2	HERPUD family member 2	10	0.17	0.266	-1.35	2
6729	SRP54	signal recognition particle 54kDa	10	0.41	6.65	-0.05	1.51
890	CCNA2	cyclin A2	9	-1.24	5.68	-2	1.39
51693	TRAPPC2L	trafficking protein particle complex 2-like	10	-0.19	0.989	-1.5	1.8
5885	RAD21	RAD21 homolog (S. pombe)	6	-1.17	6.82	-2	1.56
6155	RPL27	ribosomal protein L27	7	-2.21	24.5	-4	-1.72
6154	RPL26	ribosomal protein L26	7	-0.99	5.07	-2	-0.13
6651	SON	SON DNA binding protein	18	-2.77	28.5	-5	-2.18
23341	DNAJC16	DnaJ (Hsp40) homolog, subfamily C, member 16	10	0	0	-1.65	1.88
5861	RAB1A	RAB1A, member RAS oncogene family	10	0	0	-1.99	1.54
60481	ELOVL5	ELOVL fatty acid elongase 5	10	-0.37	1.99	-2	1.02
2804	GOLGB1	golgin B1	10	1.57	3.48	-0.46	3
23760	PITPNB	phosphatidylinositol transfer protein, beta	10	-1.3	10.7	-2	-0.74
5704	PSMC4	proteasome (prosome, macropain) 26S subunit, ATPase, 4	5	1.25	5.76	-2.7	2
5706	PSMC6	proteasome (prosome, macropain) 26S subunit, ATPase, 6	5	-4.64	34.7	-8.57	-4.07
9706	ULK2	unc-51 like autophagy activating kinase 2	10	0.15	0.249	-1.35	2
1296	COL8A2	collagen, type VIII, alpha 2	10	-0.5	4.01	-2	0.33
51575	ESF1	ESF1, nucleolar pre-rRNA processing protein, homolog (S. cerevisiae)	18	1.9	17	1.3	3.55
279	AMY2A	amylase, alpha 2A (pancreatic)	10	-0.24	0.903	-2	1.27
27430	MAT2B	methionine adenosyltransferase II, beta	20	-0.19	1.39	-1.18	1.58
8570	KHSRP	KH-type splicing regulatory protein	9	-0.13	0.663	-2	1.4
4738	NEDD8	neural precursor cell expressed, developmentally down-regulated 8	8	1.74	23.4	1.21	2.9
84720	PIGO	phosphatidylinositol glycan anchor biosynthesis, class O	10	0	0	-1.52	1.99
7415	VCP	valosin containing protein	6	2.13	23.4	1.61	3.91
55275	VPS53	vacuolar protein sorting 53 homolog (S. cerevisiae)	10	1.67	11.2	1.12	2.95
4247	MGAT2	mannosyl (alpha-1,6-)-glycoprotein beta-1,2-N-acetylglucosaminyltransferase	10	-0.34	3.15	-2	0.5
4248	MGAT3	mannosyl (beta-1,4-)-glycoprotein beta-1,4-N-acetylglucosaminyltransferase	9	0.4	1.79	-1.02	2
160	AP2A1	adaptor-related protein complex 2, alpha 1 subunit	10	-1.16	21.1	-2.32	-0.56
79029	SPATA5L1	spermatogenesis associated 5-like 1	9	1.25	14.4	-1.62	2
6571	SLC18A2	solute carrier family 18 (vesicular monoamine transporter), member 2	9	-0.86	5.52	-2	-0.19
10297	APC2	adenomatosis polyposis coli 2	19	-0.08	0.203	-1.87	1.18
51177	PLEKHO1	pleckstrin homology domain containing, family O member 1	10	-0.15	0.679	-2	1.33
5031	P2RY6	pyrimidinergic receptor P2Y, G-protein coupled, 6	10	-0.14	0.516	-1.45	1.95
9554	SEC22B	SEC22 vesicle trafficking protein homolog B (S. cerevisiae) (gene/pseudogene)	9	-2	63.7	-3.3	-1.47
1056	CEL	carboxyl ester lipase	10	-1.23	3.18	-2	0.84
121665	SPPL3	signal peptide peptidase like 3	10	-0.64	15.1	-1.4	-0.31
338328	GPIHBP1	glycosylphosphatidylinositol anchored high density lipoprotein binding protein 1	10	0	0	-1.63	1.9
11224	RPL35	ribosomal protein L35	9	1.48	3.29	-2.72	3
51566	ARMCX3	armadillo repeat containing, X-linked 3	10	-0.35	1.02	-2	1.11
23163	GGA3	golgi-associated, gamma adaptin ear containing, ARF binding protein 3	10	0.37	3.01	-1.18	1.91
6156	RPL30	ribosomal protein L30	6	1.7	12.6	0.94	3
23469	PHF3	PHD finger protein 3	9	0.29	1.46	-1.44	1.98
64746	ACBD3	acyl-CoA binding domain containing 3	10	1.2	46.6	0.82	1.81
8450	CUL4B	cullin 4B	10	-0.18	1.12	-2	1.28
10146	G3BP1	GTPase activating protein (SH3 domain) binding protein 1	10	0.54	8.03	-1.14	2
1387	CREBBP	CREB binding protein	10	0.4	3.86	-0.3	2
55837	EAPP	E2F-associated phosphoprotein	10	0.8	6.1	-0.73	2
51542	VPS54	vacuolar protein sorting 54 homolog (S. cerevisiae)	10	-3.48	15.2	-6.69	-2.84
285605	DTWD2	DTW domain containing 2	10	0	0	-1.46	2
3609	ILF3	interleukin enhancer binding factor 3, 90kDa	10	-0.35	4.45	-1.9	0.44
3608	ILF2	interleukin enhancer binding factor 2	6	1.14	12.7	0.74	2

## Sheet: Ricin vs Retro,Ricin norm combo
#GeneID	Symbol	GeneInfo	Combo casTLE Effect	Combo casTLE Score	Minimum Effect Estimate	Maximum Effect Estimate
506	ATP5B	ATP synthase, H+ transporting, mitochondrial F1 complex, beta polypeptide	-3.91	136	-6.29	-3.1
5688	PSMA7	proteasome (prosome, macropain) subunit, alpha type, 7	-2.89	133	-3.98	-2.1
7917	BAG6	BCL2-associated athanogene 6	-1.62	116	-2.13	-1.2
5694	PSMB6	proteasome (prosome, macropain) subunit, beta type, 6	-3.72	98.4	-5.87	-3.2
5717	PSMD11	proteasome (prosome, macropain) 26S subunit, non-ATPase, 11	2.52	97.4	2.07	4
10992	SF3B2	splicing factor 3b, subunit 2, 145kDa	-2.66	92.2	-3.99	-1.96
80018	NAA25	N(alpha)-acetyltransferase 25, NatB auxiliary subunit	-2.34	91.7	-5	2.57
6634	SNRPD3	small nuclear ribonucleoprotein D3 polypeptide 18kDa	-3.38	91.6	-5.91	-2.51
9554	SEC22B	SEC22 vesicle trafficking protein homolog B (S. cerevisiae) (gene/pseudogene)	-3.19	89.4	-4.31	-1.79
6651	SON	SON DNA binding protein	4.31	87.2	3.03	6.36
64746	ACBD3	acyl-CoA binding domain containing 3	1.12	86	0.82	1.48
5700	PSMC1	proteasome (prosome, macropain) 26S subunit, ATPase, 1	-3.94	85.2	-6.75	-3.01
6240	RRM1	ribonucleotide reductase M1	-3.54	84.3	-5.81	-2.83
55737	VPS35	vacuolar protein sorting 35 homolog (S. cerevisiae)	-2.66	84	-3.93	-2.07
10483	SEC23B	Sec23 homolog B (S. cerevisiae)	-1.02	82.4	-2.41	-0.78
10036	CHAF1A	chromatin assembly factor 1, subunit A (p150)	-2.75	76.4	-4.08	-2.18
1350	COX7C	cytochrome c oxidase subunit VIIc	2.57	76.2	2.03	3.96
83548	COG3	component of oligomeric golgi complex 3	2.17	75.4	1.41	3.41
9126	SMC3	structural maintenance of chromosomes 3	3.49	75.2	2.47	5.33
4605	MYBL2	v-myb avian myeloblastosis viral oncogene homolog-like 2	-3.19	74.2	-5.33	-2.29
8667	EIF3H	eukaryotic translation initiation factor 3, subunit H	3.08	73.9	2.38	4.78
23256	SCFD1	sec1 family domain containing 1	3.19	73.7	1.99	4.25
55015	PRPF39	pre-mRNA processing factor 39	-2.29	67.1	-3.48	-1.57
5770	PTPN1	protein tyrosine phosphatase, non-receptor type 1	-4.74	66.7	-7.33	-3.82
439	ASNA1	arsA arsenite transporter, ATP-binding, homolog 1 (bacterial)	2.73	62.4	1.77	3.78
10484	SEC23A	Sec23 homolog A (S. cerevisiae)	-2.23	61	-3.47	-1.69
203068	TUBB	tubulin, beta class I	-2.06	60.7	-3.13	-1.43
6484	ST3GAL4	ST3 beta-galactoside alpha-2,3-sialyltransferase 4	1.03	60.5	0.86	2.33
6194	RPS6	ribosomal protein S6	-4.31	58.4	-7.17	-3.49
6165	RPL35A	ribosomal protein L35a	-3.33	58.2	-5.61	-2.52
79029	SPATA5L1	spermatogenesis associated 5-like 1	2.87	55.9	1.67	4.12
58477	SRPRB	signal recognition particle receptor, B subunit	-2.86	54.3	-4.58	-2.33
6449	SGTA	small glutamine-rich tetratricopeptide repeat (TPR)-containing, alpha	-0.8	53.6	-1.17	-0.56
1314	COPA	coatomer protein complex, subunit alpha	-3.04	53.6	-5.3	-2.21
400	ARL1	ADP-ribosylation factor-like 1	2.99	53.3	1.51	5.27
4249	MGAT5	mannosyl (alpha-1,6-)-glycoprotein beta-1,6-N-acetyl-glucosaminyltransferase	2.17	52.6	1.42	3.16
6124	RPL4	ribosomal protein L4	1.68	52.1	-4.24	3
23160	WDR43	WD repeat domain 43	-3.3	51.2	-5.67	-2.83
2762	GMDS	GDP-mannose 4,6-dehydratase	-0.77	51.2	-1.11	-0.55
23212	RRS1	RRS1 ribosome biogenesis regulator homolog (S. cerevisiae)	3.27	51.2	2.72	5.5
2091	FBL	fibrillarin	2.36	51.1	1.88	3.7
7272	TTK	TTK protein kinase	-3.27	50.8	-6	3.06
5426	POLE	polymerase (DNA directed), epsilon, catalytic subunit	-2.22	50.2	-3.76	-1.73
25813	SAMM50	SAMM50 sorting and assembly machinery component	2.91	48.2	2.08	5.17
890	CCNA2	cyclin A2	1.16	47.6	0.77	2.02
8661	EIF3A	eukaryotic translation initiation factor 3, subunit A	-2.15	46.4	-3.65	-1.48
10885	WDR3	WD repeat domain 3	-2.98	46.2	-6	1.83
51138	COPS4	COP9 signalosome subunit 4	-3.98	45.9	-7.01	-3.11
7203	CCT3	chaperonin containing TCP1, subunit 3 (gamma)	-2.04	45.6	-4	5.21
55717	WDR11	WD repeat domain 11	1.73	45.6	1.03	2.52
25879	DCAF13	DDB1 and CUL4 associated factor 13	4.63	45.3	4.06	8.56
51258	MRPL51	mitochondrial ribosomal protein L51	-4.22	45	-6.99	-3.35
6301	SARS	seryl-tRNA synthetase	-1.63	43.7	-2.64	-1.17
6185	RPN2	ribophorin II	-1.01	43	-1.45	-0.68
10575	CCT4	chaperonin containing TCP1, subunit 4 (delta)	2.81	42.7	1.99	4.57
1981	EIF4G1	eukaryotic translation initiation factor 4 gamma, 1	-1.53	42.7	-2.27	-0.97
160	AP2A1	adaptor-related protein complex 2, alpha 1 subunit	5.31	40.8	4.7	9.47
8664	EIF3D	eukaryotic translation initiation factor 3, subunit D	2.5	40.2	1.84	4.43
51542	VPS54	vacuolar protein sorting 54 homolog (S. cerevisiae)	-3.42	40.2	-6.51	-1.77
25839	COG4	component of oligomeric golgi complex 4	3.17	39.6	2.54	5.67
9777	TM9SF4	transmembrane 9 superfamily protein member 4	0.82	38.8	0.55	1.31
27340	UTP20	UTP20, small subunit (SSU) processome component, homolog (yeast)	-3.06	38.8	-5.37	-1.91
60684	TRAPPC11	trafficking protein particle complex 11	1.34	38.7	0.82	2.16
6129	RPL7	ribosomal protein L7	-2.69	38.5	-4.38	-1.37
10972	TMED10	transmembrane emp24-like trafficking protein 10 (yeast)	-1.55	38.4	-2.42	-0.97
9039	UBA3	ubiquitin-like modifier activating enzyme 3	-0.86	38	-2.68	-0.53
7360	UGP2	UDP-glucose pyrophosphorylase 2	-0.68	36.8	-2.3	-0.41
51575	ESF1	ESF1, nucleolar pre-rRNA processing protein, homolog (S. cerevisiae)	-2.16	36	-3.62	-1.59
8563	THOC5	THO complex 5	-2.35	35.6	-3.83	-1.61
121665	SPPL3	signal peptide peptidase like 3	-0.69	34.8	-1.02	-0.46
29882	ANAPC2	anaphase promoting complex subunit 2	-2.37	34.7	-4.32	-1.5
3692	EIF6	eukaryotic translation initiation factor 6	1.79	33.7	1.41	2.88
5706	PSMC6	proteasome (prosome, macropain) 26S subunit, ATPase, 6	-4.63	33.7	-8.43	-3.96
3608	ILF2	interleukin enhancer binding factor 2	-2.22	33.3	-3.85	-1.46
55699	IARS2	isoleucyl-tRNA synthetase 2, mitochondrial	2.74	32.6	1.25	5
5709	PSMD3	proteasome (prosome, macropain) 26S subunit, non-ATPase, 3	-2.56	32.3	-4.57	-1.71
10291	SF3A1	splicing factor 3a, subunit 1, 120kDa	1.08	31.9	0.68	1.59
9632	SEC24C	SEC24 family member C	-0.74	31.2	-1.24	-0.48
3190	HNRNPK	heterogeneous nuclear ribonucleoprotein K	-1.24	30.7	-2	1.85
498	ATP5A1	ATP synthase, H+ transporting, mitochondrial F1 complex, alpha subunit 1, cardiac muscle	-2.89	30.1	-4.94	-2.31
4677	NARS	asparaginyl-tRNA synthetase	-3.22	29.8	-5.84	-2.64
4738	NEDD8	neural precursor cell expressed, developmentally down-regulated 8	1.79	29	1.29	2.74
5708	PSMD2	proteasome (prosome, macropain) 26S subunit, non-ATPase, 2	-1.54	28.7	-2.55	-1.02
5885	RAD21	RAD21 homolog (S. pombe)	1.36	28	0.89	2.49
10142	AKAP9	A kinase (PRKA) anchor protein 9	0.78	27	0.44	1.27
8907	AP1M1	adaptor-related protein complex 1, mu 1 subunit	-2.21	26.7	-3.95	-1.63
25900	IFFO1	intermediate filament family orphan 1	-1.81	25.4	-3.42	-1.12
23168	RTF1	Rtf1, Paf1/RNA polymerase II complex component, homolog (S. cerevisiae)	1.87	25.2	1.4	2.96
27333	GOLIM4	golgi integral membrane protein 4	0.6	24.8	0.33	0.94
23071	ERP44	endoplasmic reticulum protein 44	-0.53	24.6	-0.81	-0.31
7415	VCP	valosin containing protein	2.08	24.6	1.4	3.77
6156	RPL30	ribosomal protein L30	-3.89	24.1	-6.97	-3.42
6181	RPLP2	ribosomal protein, large, P2	-0.89	23.8	-1.55	-0.56
1315	COPB1	coatomer protein complex, subunit beta 1	2.81	23.2	1.72	5
5704	PSMC4	proteasome (prosome, macropain) 26S subunit, ATPase, 4	1.44	22.8	0.91	2.77
6155	RPL27	ribosomal protein L27	-2.2	21.7	-4	-1.36
5511	PPP1R8	protein phosphatase 1, regulatory subunit 8	-1.08	21.4	-2.16	-0.47
6293	VPS52	vacuolar protein sorting 52 homolog (S. cerevisiae)	3.09	21.3	2.55	5.86
23028	KDM1A	lysine (K)-specific demethylase 1A	-1.18	21.1	-2.38	-0.57
5707	PSMD1	proteasome (prosome, macropain) 26S subunit, non-ATPase, 1	-2.32	21	-4	-1.82
5518	PPP2R1A	protein phosphatase 2, regulatory subunit A, alpha	1.19	20.8	0.29	2.47
51386	EIF3L	eukaryotic translation initiation factor 3, subunit L	1	20.1	0.61	1.79
51552	RAB14	RAB14, member RAS oncogene family	0.55	20.1	0.31	0.97
7371	UCK2	uridine-cytidine kinase 2	-2.64	19.7	-4.99	-2.18
2683	B4GALT1	UDP-Gal:betaGlcNAc beta 1,4- galactosyltransferase, polypeptide 1	-0.62	19	-1.01	-0.33
11196	SEC23IP	SEC23 interacting protein	-0.55	18.6	-0.94	-0.29
65264	UBE2Z	ubiquitin-conjugating enzyme E2Z	3.37	18.5	0.7	5.05
219988	PATL1	protein associated with topoisomerase II homolog 1 (yeast)	-0.97	18.1	-2	0.97
285855	RPL7L1	ribosomal protein L7-like 1	1.46	18	0.96	2.55
10342	TFG	TRK-fused gene	-4.85	17.7	-9	0.62
22878	TRAPPC8	trafficking protein particle complex 8	2.02	17	1.52	3.77
150946	GAREML	GRB2 associated, regulator of MAPK1-like	2.82	16.8	1.32	5
259282	BOD1L1	biorientation of chromosomes in cell division 1-like 1	-0.85	16.4	-1.36	-0.41
10290	SPEG	SPEG complex locus	2.74	15.3	2.22	5
63035	BCORL1	BCL6 corepressor-like 1	0.77	15.1	0.38	1.39
283870	BRICD5	BRICHOS domain containing 5	-1.26	14.8	-2.48	-0.62
166614	DCLK2	doublecortin-like kinase 2	1.54	14.6	1.07	2.9
51096	UTP18	UTP18 small subunit (SSU) processome component homolog (yeast)	-1.86	13.9	-3.72	-1.01
60559	SPCS3	signal peptidase complex subunit 3 homolog (S. cerevisiae)	-0.44	13.7	-0.88	-0.19
85446	ZFHX2	zinc finger homeobox 2	-5.15	13.6	-9.77	-4.73
23760	PITPNB	phosphatidylinositol transfer protein, beta	-1.1	13.5	-1.94	-0.71
10075	HUWE1	HECT, UBA and WWE domain containing 1, E3 ubiquitin protein ligase	-0.98	13.3	-2.06	-0.33
8665	EIF3F	eukaryotic translation initiation factor 3, subunit F	-1.89	13.3	-4	3.33
9276	COPB2	coatomer protein complex, subunit beta 2 (beta prime)	-1.16	13.1	-1.94	-0.66
55837	EAPP	E2F-associated phosphoprotein	0.86	13	0.41	1.61
51430	SUCO	SUN domain containing ossification factor	-0.66	12.9	-1.24	-0.21
116541	MRPL54	mitochondrial ribosomal protein L54	-1.4	12.8	-2.8	-0.92
124245	ZC3H18	zinc finger CCCH-type containing 18	-0.68	12.6	-2	2.32
55806	HR	hair growth associated	1.57	12.2	0.74	3
5591	PRKDC	protein kinase, DNA-activated, catalytic polypeptide	-1.45	11.8	-3	0.89
27430	MAT2B	methionine adenosyltransferase II, beta	0.36	11.6	0.22	2.58
80218	NAA50	N(alpha)-acetyltransferase 50, NatE catalytic subunit	-0.98	11.5	-1.74	-0.31
9054	NFS1	NFS1 cysteine desulfurase	1.63	11.4	0.44	2.76
6160	RPL31	ribosomal protein L31	1.24	11.3	-1.62	2
10802	SEC24A	SEC24 family member A	-0.43	11	-0.91	-0.15
55275	VPS53	vacuolar protein sorting 53 homolog (S. cerevisiae)	1.58	11	0.9	2.82
4170	MCL1	myeloid cell leukemia 1	-1.12	10.8	-2	1.64
1984	EIF5A	eukaryotic translation initiation factor 5A	0.57	10.7	0.23	1.46
1660	DHX9	DEAH (Asp-Glu-Ala-His) box helicase 9	0.76	10.6	-0.42	2
8295	TRRAP	transformation/transcription domain-associated protein	1.7	9.84	-0.67	3
23277	CLUH	clustered mitochondria (cluA/CLU1) homolog	0.88	9.72	0.28	1.77
1639	DCTN1	dynactin 1	0.58	8.78	-0.77	1.9
10427	SEC24B	SEC24 family member B	-0.63	8.71	-1.55	-0.19
22930	RAB3GAP1	RAB3 GTPase activating protein subunit 1 (catalytic)	0.45	7.86	0.08	1.22
1137	CHRNA4	cholinergic receptor, nicotinic, alpha 4 (neuronal)	2.54	7.68	1.93	5
7026	NR2F2	nuclear receptor subfamily 2, group F, member 2	2.08	7.46	1.58	3.95
5862	RAB2A	RAB2A, member RAS oncogene family	0.36	7.19	0.03	1.06
11224	RPL35	ribosomal protein L35	1.39	6.97	-2.45	3
4247	MGAT2	mannosyl (alpha-1,6-)-glycoprotein beta-1,2-N-acetylglucosaminyltransferase	-0.33	6.79	-0.9	-0.01
2804	GOLGB1	golgin B1	1.29	6.78	0.13	2.67
169714	QSOX2	quiescin Q6 sulfhydryl oxidase 2	-0.57	6.74	-1.42	-0.06
10146	G3BP1	GTPase activating protein (SH3 domain) binding protein 1	0.38	6.54	-0.6	1.7
283171	C11ORF44	chromosome 11 open reading frame 44	-1.53	6.47	-3	-0.37
29117	BRD7	bromodomain containing 7	0.43	6.35	0.03	1.2
1457	CSNK2A1	casein kinase 2, alpha 1 polypeptide	0.43	6	-0.02	1.32
57661	PHRF1	PHD and ring finger domains 1	0.66	5.93	-2.5	2
91419	XRCC6BP1	XRCC6 binding protein 1	-1.19	5.83	-2.69	-0.08
6729	SRP54	signal recognition particle 54kDa	0.39	5.78	-0.85	1.1
60481	ELOVL5	ELOVL fatty acid elongase 5	-0.55	5.66	-1.85	-0.04
54808	DYM	dymeclin	0.52	5.36	0.02	1.67
23119	HIC2	hypermethylated in cancer 2	-0.47	5.33	-1.15	0.08
387264	KRTAP5-1	keratin associated protein 5-1	-0.53	5.14	-1.8	0.12
10861	SLC26A1	solute carrier family 26 (anion exchanger), member 1	0.46	4.79	-0.12	1.49
2134	EXTL1	exostosin-like glycosyltransferase 1	0.49	4.68	-0.22	1.65
9919	SEC16A	SEC16 homolog A (S. cerevisiae)	-0.32	4.51	-1.19	1.16
1056	CEL	carboxyl ester lipase	-1.2	4.46	-2	0.25
152559	PAQR3	progestin and adipoQ receptor family member III	-1.07	4.43	-1.99	-0.22
56850	GRIPAP1	GRIP1 associated protein 1	-0.42	4.4	-1.33	0.49
3326	HSP90AB1	heat shock protein 90kDa alpha (cytosolic), class B member 1	0.3	4.39	-0.25	1.17
372	ARCN1	archain 1	-0.84	4.35	-2	0.35
126003	TRAPPC5	trafficking protein particle complex 5	-1.57	4.33	-3	-0.41
10642	IGF2BP1	insulin-like growth factor 2 mRNA binding protein 1	-0.27	4.27	-1.12	0.25
23526	HMHA1	histocompatibility (minor) HA-1	0.46	4.22	-0.23	1.59
6154	RPL26	ribosomal protein L26	-0.76	4.06	-2	0.46
81493	SYNC	syncoilin, intermediate filament protein	1.28	3.97	0.07	2
84283	TMEM79	transmembrane protein 79	-0.68	3.8	-1.94	0.3
2302	FOXJ1	forkhead box J1	-0.27	3.59	-1.31	0.81
6836	SURF4	surfeit 4	0.43	3.5	-0.78	1.74
23352	UBR4	ubiquitin protein ligase E3 component n-recognin 4	0.77	3.46	-0.26	2
10959	TMED2	transmembrane emp24 domain trafficking protein 2	-0.43	3.44	-1.48	0.43
1296	COL8A2	collagen, type VIII, alpha 2	-0.48	3.44	-1.57	0.65
4248	MGAT3	mannosyl (beta-1,4-)-glycoprotein beta-1,4-N-acetylglucosaminyltransferase	0.53	3.44	-0.12	1.77
8694	DGAT1	diacylglycerol O-acyltransferase 1	0.29	3.42	-0.74	1.35
221079	ARL5B	ADP-ribosylation factor-like 5B	-0.37	3.36	-1.44	0.28
9782	MATR3	matrin 3	0.54	3.34	-0.22	1.75
50807	ASAP1	ArfGAP with SH3 domain, ankyrin repeat and PH domain 1	0.33	3.32	-0.84	1.4
4904	YBX1	Y box binding protein 1	-0.54	3.3	-1.81	0.15
8412	BCAR3	breast cancer anti-estrogen resistance 3	0.24	3.05	-0.28	1
6571	SLC18A2	solute carrier family 18 (vesicular monoamine transporter), member 2	-0.81	3.03	-1.97	0.13
10498	CARM1	coactivator-associated arginine methyltransferase 1	-0.99	2.98	-2	0.05
149699	GTSF1L	gametocyte specific factor 1-like	-0.37	2.85	-1.65	0.33
375	ARF1	ADP-ribosylation factor 1	-0.32	2.84	-2	0.38
51495	PTPLAD1	protein tyrosine phosphatase-like A domain containing 1	-0.26	2.83	-1.38	0.75
353324	SPATA12	spermatogenesis associated 12	0.36	2.72	-0.66	1.6
8450	CUL4B	cullin 4B	-0.27	2.68	-1.48	0.45
1387	CREBBP	CREB binding protein	0.44	2.68	-0.99	1.84
3609	ILF3	interleukin enhancer binding factor 3, 90kDa	-0.31	2.55	-1.3	1.31
3006	HIST1H1C	histone cluster 1, H1c	0.39	2.54	-0.63	1.65
56124	PCDHB12	protocadherin beta 12	0.2	2.27	-0.62	1.52
64130	LIN7B	lin-7 homolog B (C. elegans)	-0.29	2.25	-1.88	1.05
8943	AP3D1	adaptor-related protein complex 3, delta 1 subunit	0.42	2.09	-0.88	1.78
23163	GGA3	golgi-associated, gamma adaptin ear containing, ARF binding protein 3	0.4	2.01	-0.51	1.91
9262	STK17B	serine/threonine kinase 17b	0.29	1.81	-1.15	1.53
642517	AGAP9	ArfGAP with GTPase domain, ankyrin repeat and PH domain 9	0.28	1.72	-0.58	1.67
8570	KHSRP	KH-type splicing regulatory protein	-0.18	1.72	-1.66	0.79
27439	CECR6	cat eye syndrome chromosome region, candidate 6	0.12	1.57	-0.42	2.93
55288	RHOT1	ras homolog family member T1	0.24	1.55	-1.03	1.46
6721	SREBF2	sterol regulatory element binding transcription factor 2	0.44	1.55	-0.96	1.76
10492	SYNCRIP	synaptotagmin binding, cytoplasmic RNA interacting protein	0.28	1.52	-0.8	1.6
55610	CCDC132	coiled-coil domain containing 132	0.27	1.47	-0.67	1.77
90933	TRIM41	tripartite motif containing 41	0.18	1.42	-0.94	1.57
23469	PHF3	PHD finger protein 3	0.21	1.39	-1.6	1.26
51693	TRAPPC2L	trafficking protein particle complex 2-like	-0.17	1.31	-1.35	1.25
646960	PRSS56	protease, serine, 56	-0.62	1.29	-1.92	0.51
4897	NRCAM	neuronal cell adhesion molecule	0.28	1.26	-1.06	1.37
51566	ARMCX3	armadillo repeat containing, X-linked 3	-1.42	1.26	-2.95	0.16
3201	HOXA4	homeobox A4	-0.2	1.24	-1.65	0.89
2800	GOLGA1	golgin A1	-0.25	1.2	-2	0.2
140032	RPS4Y2	ribosomal protein S4, Y-linked 2	0.22	1.14	-0.9	1.57
27095	TRAPPC3	trafficking protein particle complex 3	-0.16	1.13	-1.91	0.78
79979	TRMT2B	tRNA methyltransferase 2 homolog B (S. cerevisiae)	-0.2	1.06	-0.95	1.75
84304	NUDT22	nudix (nucleoside diphosphate linked moiety X)-type motif 22	0.25	0.966	-0.97	1.74
6599	SMARCC1	SWI/SNF related, matrix associated, actin dependent regulator of chromatin, subfamily c, member 1	0.29	0.856	-0.7	1.89
112609	MRAP2	melanocortin 2 receptor accessory protein 2	0.2	0.85	-1.2	1.42
10541	ANP32B	acidic (leucine-rich) nuclear phosphoprotein 32 family, member B	1.93	0.756	-0.43	3.85
5861	RAB1A	RAB1A, member RAS oncogene family	-0.12	0.754	-0.9	2
8653	DDX3Y	DEAD (Asp-Glu-Ala-Asp) box helicase 3, Y-linked	0.17	0.719	-0.92	1.7
440270	GOLGA8B	golgin A8 family, member B	0.24	0.654	-1.04	1.71
9706	ULK2	unc-51 like autophagy activating kinase 2	0.21	0.649	-1	1.6
79822	ARHGAP28	Rho GTPase activating protein 28	-0.21	0.616	-1.88	0.79
255488	RNF144B	ring finger protein 144B	0.16	0.585	-0.97	1.73
9559	VPS26A	vacuolar protein sorting 26 homolog A (S. pombe)	0.21	0.566	-1.77	1.34
279	AMY2A	amylase, alpha 2A (pancreatic)	-0.14	0.545	-1.82	0.81
26225	ARL5A	ADP-ribosylation factor-like 5A	-0.19	0.541	-1.73	0.9
8675	STX16	syntaxin 16	-0.14	0.533	-1.66	1.06
285605	DTWD2	DTW domain containing 2	0.21	0.525	-0.73	1.91
147199	SCGB1C1	secretoglobin, family 1C, member 1	-0.15	0.522	-1.8	0.86
50999	TMED5	transmembrane emp24 protein transport domain containing 5	-0.13	0.442	-1.82	0.9
643641	ZNF862	zinc finger protein 862	-0.09	0.439	-1.76	1.02
58533	SNX6	sorting nexin 6	0.47	0.367	-2.72	1.63
64283	ARHGEF28	Rho guanine nucleotide exchange factor (GEF) 28	0.19	0.365	-0.82	1.84
9399	STOML1	stomatin (EPB72)-like 1	0.06	0.298	-0.58	2
84548	TMEM185A	transmembrane protein 185A	0.5	0.28	-0.62	2
79690	GAL3ST4	galactose-3-O-sulfotransferase 4	-0.25	0.253	-1.82	0.53
869	CBLN1	cerebellin 1 precursor	-0.14	0.249	-2	0.55
5868	RAB5A	RAB5A, member RAS oncogene family	-0.1	0.231	-2	0.7
361	AQP4	aquaporin 4	0.08	0.215	-1.2	1.6
139324	HDX	highly divergent homeobox	-0.08	0.211	-1.92	0.91
6596	HLTF	helicase-like transcription factor	-0.09	0.17	-1.71	1.13
100129520	LOC100129520	testis expressed sequence 13-like	0.06	0.169	-0.55	2
6399	TRAPPC2	trafficking protein particle complex 2	0.06	0.163	-1.1	1.84
5867	RAB4A	RAB4A, member RAS oncogene family	-0.08	0.158	-1.76	1.15
5031	P2RY6	pyrimidinergic receptor P2Y, G-protein coupled, 6	-0.05	0.129	-2	0.89
9465	AKAP7	A kinase (PRKA) anchor protein 7	-0.15	0.116	-1	1.96
386682	KRTAP10-3	keratin associated protein 10-3	-0.04	0.079	-2	0.83
25818	KLK5	kallikrein-related peptidase 5	-0.05	0.0722	-1.74	1.11
51177	PLEKHO1	pleckstrin homology domain containing, family O member 1	-0.06	0.0706	-1.42	1.38
84189	SLITRK6	SLIT and NTRK-like family, member 6	-0.05	0.0573	-1.38	1.52
55244	SLC47A1	solute carrier family 47 (multidrug and toxin extrusion), member 1	0.03	0.0404	-1.06	1.75
10297	APC2	adenomatosis polyposis coli 2	-0.02	0.027	-2.86	0.28
6996	TDG	thymine-DNA glycosylase	0.02	0.0195	-1.8	1.17
221091	LRRN4CL	LRRN4 C-terminal like	-0.02	0.0129	-0.72	2
8989	TRPA1	transient receptor potential cation channel, subfamily A, member 1	0.01	0.00731	-0.69	2
8647	ABCB11	ATP-binding cassette, sub-family B (MDR/TAP), member 11	0.01	0.00691	-1.26	1.7
84720	PIGO	phosphatidylinositol glycan anchor biosynthesis, class O	0.01	0.00646	-0.9	1.91
1139	CHRNA7	cholinergic receptor, nicotinic, alpha 7 (neuronal)	-0.01	0.00512	-1.5	1.44
81876	RAB1B	RAB1B, member RAS oncogene family	-0.01	0.00462	-2	0.72
23341	DNAJC16	DnaJ (Hsp40) homolog, subfamily C, member 16	0.01	0.00193	-1.42	1.57
727940	RHOXF2B	Rhox homeobox family, member 2B	-0.01	0.00134	-1.38	1.53
2939	GSTA2	glutathione S-transferase alpha 2	0	0	-1.25	1.68
5757	PTMA	prothymosin, alpha	0	0	-1.5	1.51
55163	PNPO	pyridoxamine 5'-phosphate oxidase	0	0	-1.65	1.48
196415	C12ORF77	chromosome 12 open reading frame 77	0	0	-1.32	2
89866	SEC16B	SEC16 homolog B (S. cerevisiae)	0	0	-1.38	1.65
59272	ACE2	angiotensin I converting enzyme 2	0	0	-1.33	1.62
LOC100289187	LOC100289187	N/A	0	0	-1.49	1.51
3141	HLCS	holocarboxylase synthetase (biotin-(proprionyl-CoA-carboxylase (ATP-hydrolysing)) ligase)	0	0	-0.67	1.89
118670	FAM24A	family with sequence similarity 24, member A	0	0	-1.42	1.51
9457	FHL5	four and a half LIM domains 5	0	0	-1.72	1.28
64224	HERPUD2	HERPUD family member 2	0	0	-1.24	1.67
6230	RPS25	ribosomal protein S25	0	0	-1.39	1.6
56681	SAR1A	secretion associated, Ras related GTPase 1A	0	0	-1.83	1.13
25853	DCAF12	DDB1 and CUL4 associated factor 12	0	0	-1.35	1.73
100132146	LOC100132146	uncharacterized LOC100132146	0	0	-1.56	1.51
55504	TNFRSF19	tumor necrosis factor receptor superfamily, member 19	0	0	-1.88	0.21
338328	GPIHBP1	glycosylphosphatidylinositol anchored high density lipoprotein binding protein 1	0	0	-1.56	1.5
3320	HSP90AA1	heat shock protein 90kDa alpha (cytosolic), class A member 1	0	0	-1.41	1.65

[truncated: 6 more sheets: Ricin vs Retro plus Ricin rep 1, Ricin vs Retro plus Ricin rep 2, Ricin vs Retro plus Ricin combo, Retro vs Retro plus Ricin rep 2, Retro vs Retro plus Ricin rep 1, Retro vs Retro plus Ricin combo]
