# Supplementary material for: Retro-2 protects cells from ricin toxicity by inhibiting ASNA1-mediated ER targeting and insertion of tail-anchored proteins
Source: eLife. 2019 Nov 1;8:e48434. doi: 10.7554/eLife.48434 (PMC6858068; doi:10.7554/eLife.48434)
Supplement: Figure 1—source data 3. [file elife-48434-fig1-data3.xlsx]

## Sheet: Legend
										Two columns
	Sheet	Legend								Name of guide	Number of counts observed
	Plasmid	Raw sequencing counts for each element in the starting plasmid library
	Untreated rep 1	Raw sequencing counts for each element in untreated replicate 1
	Untreated rep 2	Raw sequencing counts for each element in untreated replicate 2								Naming scheme indicates pair of guides
	Ricin rep 1	Raw sequencing counts for each element in ricin treated replicate 1								Symbol 1 + symbol 2	add info	add info	guide ID 1 + guide ID 2
	Ricin rep 2	Raw sequencing counts for each element in ricin treated replicate 2
										"0Safe" indicates safe-targeting guides
										Examples
										0Safe+0Safe_safe+safe_204603.4554+204603.4554
										IFFO1+PSMD3_P1+P1P2_140836+81592
										Reciprocal guides have been combined (AB vs BA)
										Gene-targeting guides paired with safe-targeting guides have been filtered

## Sheet: Ricin rep 1
0Safe+0Safe_safe+safe_204603.4554+204603.4554	168
0Safe+0Safe_safe+safe_204603.4554+204750.4701	258
0Safe+0Safe_safe+safe_204603.4554+204798.4749	355
0Safe+0Safe_safe+safe_204603.4554+204895.4846	253
0Safe+0Safe_safe+safe_204603.4554+205190.5141	239
0Safe+0Safe_safe+safe_204603.4554+205244.5195	151
0Safe+0Safe_safe+safe_204603.4554+205896.5847	187
0Safe+0Safe_safe+safe_204603.4554+205926.5877	298
0Safe+0Safe_safe+safe_204603.4554+206014.5965	170
0Safe+0Safe_safe+safe_204603.4554+206141.1592	300
0Safe+0Safe_safe+safe_204603.4554+206175.1626	198
0Safe+0Safe_safe+safe_204603.4554+206180.1631	228
0Safe+0Safe_safe+safe_204603.4554+206276.1727	206
0Safe+0Safe_safe+safe_204603.4554+207086.1286	382
0Safe+0Safe_safe+safe_204603.4554+207133.1333	366
0Safe+0Safe_safe+safe_204603.4554+207268.1468	274
0Safe+0Safe_safe+safe_204603.4554+207272.1472	345
0Safe+0Safe_safe+safe_204603.4554+207295.1495	252
0Safe+0Safe_safe+safe_204603.4554+207412.862	292
0Safe+0Safe_safe+safe_204603.4554+207644.2345	415
0Safe+0Safe_safe+safe_204603.4554+207736.2437	191
0Safe+0Safe_safe+safe_204603.4554+207762.2463	161
0Safe+0Safe_safe+safe_204603.4554+207933.2634	276
0Safe+0Safe_safe+safe_204603.4554+208027.2728	257
0Safe+0Safe_safe+safe_204603.4554+208233.2934	329
0Safe+0Safe_safe+safe_204603.4554+208249.2950	165
0Safe+0Safe_safe+safe_204603.4554+208251.2952	269
0Safe+0Safe_safe+safe_204603.4554+208266.2967	284
0Safe+0Safe_safe+safe_204603.4554+208280.2981	558
0Safe+0Safe_safe+safe_204603.4554+208288.2989	406
0Safe+0Safe_safe+safe_204603.4554+208334.13	164
0Safe+0Safe_safe+safe_204603.4554+208691.451	276
0Safe+0Safe_safe+safe_204603.4554+208974.706	392
0Safe+0Safe_safe+safe_204603.4554+209014.742	182
0Safe+0Safe_safe+safe_204603.4554+209157.3858	214
0Safe+0Safe_safe+safe_204603.4554+209400.4101	335
0Safe+0Safe_safe+safe_204603.4554+209597.4298	374
0Safe+0Safe_safe+safe_204603.4554+209963.3164	299
0Safe+0Safe_safe+safe_204603.4554+209973.3174	528
0Safe+0Safe_safe+safe_204603.4554+209990.3191	215
0Safe+0Safe_safe+safe_204603.4554+210140.3341	430
0Safe+0Safe_safe+safe_204603.4554+210313.3514	337
0Safe+0Safe_safe+safe_204603.4554+210540.3741	418
0Safe+0Safe_safe+safe_204603.4554+210725.6176	175
0Safe+0Safe_safe+safe_204603.4554+210743.6194	351
0Safe+0Safe_safe+safe_204603.4554+210809.6260	260
0Safe+0Safe_safe+safe_204603.4554+210925.6376	245
0Safe+0Safe_safe+safe_204603.4554+210935.6386	199
0Safe+0Safe_safe+safe_204603.4554+210946.6397	207
0Safe+0Safe_safe+safe_204603.4554+211135.6586	471
0Safe+0Safe_safe+safe_204750.4701+204750.4701	113
0Safe+0Safe_safe+safe_204750.4701+204798.4749	302
0Safe+0Safe_safe+safe_204750.4701+204895.4846	167
0Safe+0Safe_safe+safe_204750.4701+205190.5141	352
0Safe+0Safe_safe+safe_204750.4701+205244.5195	315
0Safe+0Safe_safe+safe_204750.4701+205896.5847	233
0Safe+0Safe_safe+safe_204750.4701+205926.5877	235
0Safe+0Safe_safe+safe_204750.4701+206014.5965	166
0Safe+0Safe_safe+safe_204750.4701+206141.1592	184
0Safe+0Safe_safe+safe_204750.4701+206175.1626	318
0Safe+0Safe_safe+safe_204750.4701+206180.1631	285
0Safe+0Safe_safe+safe_204750.4701+206276.1727	323
0Safe+0Safe_safe+safe_204750.4701+207086.1286	354
0Safe+0Safe_safe+safe_204750.4701+207133.1333	273
0Safe+0Safe_safe+safe_204750.4701+207268.1468	238
0Safe+0Safe_safe+safe_204750.4701+207272.1472	249
0Safe+0Safe_safe+safe_204750.4701+207295.1495	293
0Safe+0Safe_safe+safe_204750.4701+207412.862	427
0Safe+0Safe_safe+safe_204750.4701+207644.2345	331
0Safe+0Safe_safe+safe_204750.4701+207736.2437	240
0Safe+0Safe_safe+safe_204750.4701+207762.2463	216
0Safe+0Safe_safe+safe_204750.4701+207933.2634	240
0Safe+0Safe_safe+safe_204750.4701+208027.2728	156
0Safe+0Safe_safe+safe_204750.4701+208233.2934	201
0Safe+0Safe_safe+safe_204750.4701+208249.2950	265
0Safe+0Safe_safe+safe_204750.4701+208251.2952	307
0Safe+0Safe_safe+safe_204750.4701+208266.2967	272
0Safe+0Safe_safe+safe_204750.4701+208280.2981	344
0Safe+0Safe_safe+safe_204750.4701+208288.2989	317
0Safe+0Safe_safe+safe_204750.4701+208334.13	277
0Safe+0Safe_safe+safe_204750.4701+208691.451	333
0Safe+0Safe_safe+safe_204750.4701+208974.706	301
0Safe+0Safe_safe+safe_204750.4701+209014.742	287
0Safe+0Safe_safe+safe_204750.4701+209157.3858	621
0Safe+0Safe_safe+safe_204750.4701+209400.4101	428
0Safe+0Safe_safe+safe_204750.4701+209597.4298	218
0Safe+0Safe_safe+safe_204750.4701+209963.3164	161
0Safe+0Safe_safe+safe_204750.4701+209973.3174	344
0Safe+0Safe_safe+safe_204750.4701+209990.3191	446
0Safe+0Safe_safe+safe_204750.4701+210140.3341	326
0Safe+0Safe_safe+safe_204750.4701+210313.3514	500
0Safe+0Safe_safe+safe_204750.4701+210540.3741	401
0Safe+0Safe_safe+safe_204750.4701+210725.6176	506
0Safe+0Safe_safe+safe_204750.4701+210743.6194	292
0Safe+0Safe_safe+safe_204750.4701+210809.6260	192
0Safe+0Safe_safe+safe_204750.4701+210925.6376	199
0Safe+0Safe_safe+safe_204750.4701+210935.6386	162
0Safe+0Safe_safe+safe_204750.4701+210946.6397	364
0Safe+0Safe_safe+safe_204750.4701+211135.6586	196
0Safe+0Safe_safe+safe_204798.4749+204798.4749	53
0Safe+0Safe_safe+safe_204798.4749+204895.4846	320
0Safe+0Safe_safe+safe_204798.4749+205190.5141	249
0Safe+0Safe_safe+safe_204798.4749+205244.5195	246
0Safe+0Safe_safe+safe_204798.4749+205896.5847	324
0Safe+0Safe_safe+safe_204798.4749+205926.5877	248
0Safe+0Safe_safe+safe_204798.4749+206014.5965	233
0Safe+0Safe_safe+safe_204798.4749+206141.1592	354
0Safe+0Safe_safe+safe_204798.4749+206175.1626	271
0Safe+0Safe_safe+safe_204798.4749+206180.1631	276
0Safe+0Safe_safe+safe_204798.4749+206276.1727	394
0Safe+0Safe_safe+safe_204798.4749+207086.1286	263
0Safe+0Safe_safe+safe_204798.4749+207133.1333	341
0Safe+0Safe_safe+safe_204798.4749+207268.1468	107
0Safe+0Safe_safe+safe_204798.4749+207272.1472	188
0Safe+0Safe_safe+safe_204798.4749+207295.1495	292
0Safe+0Safe_safe+safe_204798.4749+207412.862	278
0Safe+0Safe_safe+safe_204798.4749+207644.2345	466
0Safe+0Safe_safe+safe_204798.4749+207736.2437	493
0Safe+0Safe_safe+safe_204798.4749+207762.2463	372
0Safe+0Safe_safe+safe_204798.4749+207933.2634	152
0Safe+0Safe_safe+safe_204798.4749+208027.2728	188
0Safe+0Safe_safe+safe_204798.4749+208233.2934	327
0Safe+0Safe_safe+safe_204798.4749+208249.2950	348
0Safe+0Safe_safe+safe_204798.4749+208251.2952	325
0Safe+0Safe_safe+safe_204798.4749+208266.2967	371
0Safe+0Safe_safe+safe_204798.4749+208280.2981	371
0Safe+0Safe_safe+safe_204798.4749+208288.2989	390
0Safe+0Safe_safe+safe_204798.4749+208334.13	273
0Safe+0Safe_safe+safe_204798.4749+208691.451	470
0Safe+0Safe_safe+safe_204798.4749+208974.706	310
0Safe+0Safe_safe+safe_204798.4749+209014.742	160
0Safe+0Safe_safe+safe_204798.4749+209157.3858	514
0Safe+0Safe_safe+safe_204798.4749+209400.4101	380
0Safe+0Safe_safe+safe_204798.4749+209597.4298	347
0Safe+0Safe_safe+safe_204798.4749+209963.3164	243
0Safe+0Safe_safe+safe_204798.4749+209973.3174	411
0Safe+0Safe_safe+safe_204798.4749+209990.3191	177
0Safe+0Safe_safe+safe_204798.4749+210140.3341	433
0Safe+0Safe_safe+safe_204798.4749+210313.3514	233
0Safe+0Safe_safe+safe_204798.4749+210540.3741	306
0Safe+0Safe_safe+safe_204798.4749+210725.6176	393
0Safe+0Safe_safe+safe_204798.4749+210743.6194	204
0Safe+0Safe_safe+safe_204798.4749+210809.6260	197
0Safe+0Safe_safe+safe_204798.4749+210925.6376	405
0Safe+0Safe_safe+safe_204798.4749+210935.6386	252
0Safe+0Safe_safe+safe_204798.4749+210946.6397	226
0Safe+0Safe_safe+safe_204798.4749+211135.6586	211
0Safe+0Safe_safe+safe_204895.4846+204895.4846	192
0Safe+0Safe_safe+safe_204895.4846+205190.5141	277
0Safe+0Safe_safe+safe_204895.4846+205244.5195	246
0Safe+0Safe_safe+safe_204895.4846+205896.5847	246
0Safe+0Safe_safe+safe_204895.4846+205926.5877	305
0Safe+0Safe_safe+safe_204895.4846+206014.5965	121
0Safe+0Safe_safe+safe_204895.4846+206141.1592	313
0Safe+0Safe_safe+safe_204895.4846+206175.1626	212
0Safe+0Safe_safe+safe_204895.4846+206180.1631	169
0Safe+0Safe_safe+safe_204895.4846+206276.1727	136
0Safe+0Safe_safe+safe_204895.4846+207086.1286	389
0Safe+0Safe_safe+safe_204895.4846+207133.1333	307
0Safe+0Safe_safe+safe_204895.4846+207268.1468	179
0Safe+0Safe_safe+safe_204895.4846+207272.1472	227
0Safe+0Safe_safe+safe_204895.4846+207295.1495	264
0Safe+0Safe_safe+safe_204895.4846+207412.862	172
0Safe+0Safe_safe+safe_204895.4846+207644.2345	216
0Safe+0Safe_safe+safe_204895.4846+207736.2437	374
0Safe+0Safe_safe+safe_204895.4846+207762.2463	303
0Safe+0Safe_safe+safe_204895.4846+207933.2634	180
0Safe+0Safe_safe+safe_204895.4846+208027.2728	268
0Safe+0Safe_safe+safe_204895.4846+208233.2934	229
0Safe+0Safe_safe+safe_204895.4846+208249.2950	341
0Safe+0Safe_safe+safe_204895.4846+208251.2952	312
0Safe+0Safe_safe+safe_204895.4846+208266.2967	237
0Safe+0Safe_safe+safe_204895.4846+208280.2981	372
0Safe+0Safe_safe+safe_204895.4846+208288.2989	212
0Safe+0Safe_safe+safe_204895.4846+208334.13	262
0Safe+0Safe_safe+safe_204895.4846+208691.451	405
0Safe+0Safe_safe+safe_204895.4846+208974.706	388
0Safe+0Safe_safe+safe_204895.4846+209014.742	150
0Safe+0Safe_safe+safe_204895.4846+209157.3858	464
0Safe+0Safe_safe+safe_204895.4846+209400.4101	247
0Safe+0Safe_safe+safe_204895.4846+209597.4298	265
0Safe+0Safe_safe+safe_204895.4846+209963.3164	150
0Safe+0Safe_safe+safe_204895.4846+209973.3174	437
0Safe+0Safe_safe+safe_204895.4846+209990.3191	198
0Safe+0Safe_safe+safe_204895.4846+210140.3341	295
0Safe+0Safe_safe+safe_204895.4846+210313.3514	226
0Safe+0Safe_safe+safe_204895.4846+210540.3741	276
0Safe+0Safe_safe+safe_204895.4846+210725.6176	205
0Safe+0Safe_safe+safe_204895.4846+210743.6194	117
0Safe+0Safe_safe+safe_204895.4846+210809.6260	202
0Safe+0Safe_safe+safe_204895.4846+210925.6376	443
0Safe+0Safe_safe+safe_204895.4846+210935.6386	146
0Safe+0Safe_safe+safe_204895.4846+210946.6397	299
0Safe+0Safe_safe+safe_204895.4846+211135.6586	255
0Safe+0Safe_safe+safe_205190.5141+205190.5141	60
0Safe+0Safe_safe+safe_205190.5141+205244.5195	243
0Safe+0Safe_safe+safe_205190.5141+205896.5847	299
0Safe+0Safe_safe+safe_205190.5141+205926.5877	282
0Safe+0Safe_safe+safe_205190.5141+206014.5965	210
0Safe+0Safe_safe+safe_205190.5141+206141.1592	217
0Safe+0Safe_safe+safe_205190.5141+206175.1626	204
0Safe+0Safe_safe+safe_205190.5141+206180.1631	375
0Safe+0Safe_safe+safe_205190.5141+206276.1727	273
0Safe+0Safe_safe+safe_205190.5141+207086.1286	375
0Safe+0Safe_safe+safe_205190.5141+207133.1333	340
0Safe+0Safe_safe+safe_205190.5141+207268.1468	142
0Safe+0Safe_safe+safe_205190.5141+207272.1472	212
0Safe+0Safe_safe+safe_205190.5141+207295.1495	199
0Safe+0Safe_safe+safe_205190.5141+207412.862	239
0Safe+0Safe_safe+safe_205190.5141+207644.2345	236
0Safe+0Safe_safe+safe_205190.5141+207736.2437	519
0Safe+0Safe_safe+safe_205190.5141+207762.2463	204
0Safe+0Safe_safe+safe_205190.5141+207933.2634	218
0Safe+0Safe_safe+safe_205190.5141+208027.2728	207
0Safe+0Safe_safe+safe_205190.5141+208233.2934	385
0Safe+0Safe_safe+safe_205190.5141+208249.2950	174
0Safe+0Safe_safe+safe_205190.5141+208251.2952	246
0Safe+0Safe_safe+safe_205190.5141+208266.2967	256
0Safe+0Safe_safe+safe_205190.5141+208280.2981	340
0Safe+0Safe_safe+safe_205190.5141+208288.2989	343
0Safe+0Safe_safe+safe_205190.5141+208334.13	347
0Safe+0Safe_safe+safe_205190.5141+208691.451	267
0Safe+0Safe_safe+safe_205190.5141+208974.706	338
0Safe+0Safe_safe+safe_205190.5141+209014.742	345
0Safe+0Safe_safe+safe_205190.5141+209157.3858	254
0Safe+0Safe_safe+safe_205190.5141+209400.4101	332
0Safe+0Safe_safe+safe_205190.5141+209597.4298	245
0Safe+0Safe_safe+safe_205190.5141+209963.3164	287
0Safe+0Safe_safe+safe_205190.5141+209973.3174	236
0Safe+0Safe_safe+safe_205190.5141+209990.3191	233
0Safe+0Safe_safe+safe_205190.5141+210140.3341	366
0Safe+0Safe_safe+safe_205190.5141+210313.3514	136
0Safe+0Safe_safe+safe_205190.5141+210540.3741	341
0Safe+0Safe_safe+safe_205190.5141+210725.6176	222
0Safe+0Safe_safe+safe_205190.5141+210743.6194	295
0Safe+0Safe_safe+safe_205190.5141+210809.6260	241
0Safe+0Safe_safe+safe_205190.5141+210925.6376	264
0Safe+0Safe_safe+safe_205190.5141+210935.6386	345
0Safe+0Safe_safe+safe_205190.5141+210946.6397	387
0Safe+0Safe_safe+safe_205190.5141+211135.6586	294
0Safe+0Safe_safe+safe_205244.5195+205244.5195	85
0Safe+0Safe_safe+safe_205244.5195+205896.5847	172
0Safe+0Safe_safe+safe_205244.5195+205926.5877	304
0Safe+0Safe_safe+safe_205244.5195+206014.5965	362
0Safe+0Safe_safe+safe_205244.5195+206141.1592	316
0Safe+0Safe_safe+safe_205244.5195+206175.1626	249
0Safe+0Safe_safe+safe_205244.5195+206180.1631	303
0Safe+0Safe_safe+safe_205244.5195+206276.1727	212
0Safe+0Safe_safe+safe_205244.5195+207086.1286	198
0Safe+0Safe_safe+safe_205244.5195+207133.1333	329
0Safe+0Safe_safe+safe_205244.5195+207268.1468	173
0Safe+0Safe_safe+safe_205244.5195+207272.1472	300
0Safe+0Safe_safe+safe_205244.5195+207295.1495	546
0Safe+0Safe_safe+safe_205244.5195+207412.862	228
0Safe+0Safe_safe+safe_205244.5195+207644.2345	346
0Safe+0Safe_safe+safe_205244.5195+207736.2437	384
0Safe+0Safe_safe+safe_205244.5195+207762.2463	295
0Safe+0Safe_safe+safe_205244.5195+207933.2634	133
0Safe+0Safe_safe+safe_205244.5195+208027.2728	310
0Safe+0Safe_safe+safe_205244.5195+208233.2934	203
0Safe+0Safe_safe+safe_205244.5195+208249.2950	201
0Safe+0Safe_safe+safe_205244.5195+208251.2952	262
0Safe+0Safe_safe+safe_205244.5195+208266.2967	216
0Safe+0Safe_safe+safe_205244.5195+208280.2981	452
0Safe+0Safe_safe+safe_205244.5195+208288.2989	228
0Safe+0Safe_safe+safe_205244.5195+208334.13	211
0Safe+0Safe_safe+safe_205244.5195+208691.451	335
0Safe+0Safe_safe+safe_205244.5195+208974.706	299
0Safe+0Safe_safe+safe_205244.5195+209014.742	138
0Safe+0Safe_safe+safe_205244.5195+209157.3858	260
0Safe+0Safe_safe+safe_205244.5195+209400.4101	308
0Safe+0Safe_safe+safe_205244.5195+209597.4298	204
0Safe+0Safe_safe+safe_205244.5195+209963.3164	186
0Safe+0Safe_safe+safe_205244.5195+209973.3174	587
0Safe+0Safe_safe+safe_205244.5195+209990.3191	120
0Safe+0Safe_safe+safe_205244.5195+210140.3341	430
0Safe+0Safe_safe+safe_205244.5195+210313.3514	367
0Safe+0Safe_safe+safe_205244.5195+210540.3741	389
0Safe+0Safe_safe+safe_205244.5195+210725.6176	350
0Safe+0Safe_safe+safe_205244.5195+210743.6194	296
0Safe+0Safe_safe+safe_205244.5195+210809.6260	256
0Safe+0Safe_safe+safe_205244.5195+210925.6376	365
0Safe+0Safe_safe+safe_205244.5195+210935.6386	116
0Safe+0Safe_safe+safe_205244.5195+210946.6397	252
0Safe+0Safe_safe+safe_205244.5195+211135.6586	285
0Safe+0Safe_safe+safe_205896.5847+205896.5847	117
0Safe+0Safe_safe+safe_205896.5847+205926.5877	276
0Safe+0Safe_safe+safe_205896.5847+206014.5965	368
0Safe+0Safe_safe+safe_205896.5847+206141.1592	358
0Safe+0Safe_safe+safe_205896.5847+206175.1626	298
0Safe+0Safe_safe+safe_205896.5847+206180.1631	458
0Safe+0Safe_safe+safe_205896.5847+206276.1727	153
0Safe+0Safe_safe+safe_205896.5847+207086.1286	299
0Safe+0Safe_safe+safe_205896.5847+207133.1333	268
0Safe+0Safe_safe+safe_205896.5847+207268.1468	120
0Safe+0Safe_safe+safe_205896.5847+207272.1472	203
0Safe+0Safe_safe+safe_205896.5847+207295.1495	200
0Safe+0Safe_safe+safe_205896.5847+207412.862	216
0Safe+0Safe_safe+safe_205896.5847+207644.2345	367
0Safe+0Safe_safe+safe_205896.5847+207736.2437	163
0Safe+0Safe_safe+safe_205896.5847+207762.2463	230
0Safe+0Safe_safe+safe_205896.5847+207933.2634	267
0Safe+0Safe_safe+safe_205896.5847+208027.2728	168
0Safe+0Safe_safe+safe_205896.5847+208233.2934	224
0Safe+0Safe_safe+safe_205896.5847+208249.2950	340
0Safe+0Safe_safe+safe_205896.5847+208251.2952	427
0Safe+0Safe_safe+safe_205896.5847+208266.2967	199
0Safe+0Safe_safe+safe_205896.5847+208280.2981	368
0Safe+0Safe_safe+safe_205896.5847+208288.2989	578
0Safe+0Safe_safe+safe_205896.5847+208334.13	221
0Safe+0Safe_safe+safe_205896.5847+208691.451	409
0Safe+0Safe_safe+safe_205896.5847+208974.706	257
0Safe+0Safe_safe+safe_205896.5847+209014.742	343
0Safe+0Safe_safe+safe_205896.5847+209157.3858	338
0Safe+0Safe_safe+safe_205896.5847+209400.4101	460
0Safe+0Safe_safe+safe_205896.5847+209597.4298	338
0Safe+0Safe_safe+safe_205896.5847+209963.3164	282
0Safe+0Safe_safe+safe_205896.5847+209973.3174	374
0Safe+0Safe_safe+safe_205896.5847+209990.3191	191
0Safe+0Safe_safe+safe_205896.5847+210140.3341	410
0Safe+0Safe_safe+safe_205896.5847+210313.3514	363
0Safe+0Safe_safe+safe_205896.5847+210540.3741	231
0Safe+0Safe_safe+safe_205896.5847+210725.6176	172
0Safe+0Safe_safe+safe_205896.5847+210743.6194	301
0Safe+0Safe_safe+safe_205896.5847+210809.6260	299
0Safe+0Safe_safe+safe_205896.5847+210925.6376	165
0Safe+0Safe_safe+safe_205896.5847+210935.6386	347
0Safe+0Safe_safe+safe_205896.5847+210946.6397	207
0Safe+0Safe_safe+safe_205896.5847+211135.6586	156
0Safe+0Safe_safe+safe_205926.5877+205926.5877	65
0Safe+0Safe_safe+safe_205926.5877+206014.5965	212
0Safe+0Safe_safe+safe_205926.5877+206141.1592	353
0Safe+0Safe_safe+safe_205926.5877+206175.1626	247
0Safe+0Safe_safe+safe_205926.5877+206180.1631	252
0Safe+0Safe_safe+safe_205926.5877+206276.1727	179
0Safe+0Safe_safe+safe_205926.5877+207086.1286	372
0Safe+0Safe_safe+safe_205926.5877+207133.1333	226
0Safe+0Safe_safe+safe_205926.5877+207268.1468	241
0Safe+0Safe_safe+safe_205926.5877+207272.1472	419
0Safe+0Safe_safe+safe_205926.5877+207295.1495	351
0Safe+0Safe_safe+safe_205926.5877+207412.862	368
0Safe+0Safe_safe+safe_205926.5877+207644.2345	409
0Safe+0Safe_safe+safe_205926.5877+207736.2437	365
0Safe+0Safe_safe+safe_205926.5877+207762.2463	229
0Safe+0Safe_safe+safe_205926.5877+207933.2634	243
0Safe+0Safe_safe+safe_205926.5877+208027.2728	203
0Safe+0Safe_safe+safe_205926.5877+208233.2934	224
0Safe+0Safe_safe+safe_205926.5877+208249.2950	413
0Safe+0Safe_safe+safe_205926.5877+208251.2952	204
0Safe+0Safe_safe+safe_205926.5877+208266.2967	307
0Safe+0Safe_safe+safe_205926.5877+208280.2981	266
0Safe+0Safe_safe+safe_205926.5877+208288.2989	463
0Safe+0Safe_safe+safe_205926.5877+208334.13	247
0Safe+0Safe_safe+safe_205926.5877+208691.451	254
0Safe+0Safe_safe+safe_205926.5877+208974.706	512
0Safe+0Safe_safe+safe_205926.5877+209014.742	354
0Safe+0Safe_safe+safe_205926.5877+209157.3858	303
0Safe+0Safe_safe+safe_205926.5877+209400.4101	445
0Safe+0Safe_safe+safe_205926.5877+209597.4298	379
0Safe+0Safe_safe+safe_205926.5877+209963.3164	225
0Safe+0Safe_safe+safe_205926.5877+209973.3174	340
0Safe+0Safe_safe+safe_205926.5877+209990.3191	237
0Safe+0Safe_safe+safe_205926.5877+210140.3341	333
0Safe+0Safe_safe+safe_205926.5877+210313.3514	397
0Safe+0Safe_safe+safe_205926.5877+210540.3741	320
0Safe+0Safe_safe+safe_205926.5877+210725.6176	488
0Safe+0Safe_safe+safe_205926.5877+210743.6194	381
0Safe+0Safe_safe+safe_205926.5877+210809.6260	183
0Safe+0Safe_safe+safe_205926.5877+210925.6376	246
0Safe+0Safe_safe+safe_205926.5877+210935.6386	348
0Safe+0Safe_safe+safe_205926.5877+210946.6397	152
0Safe+0Safe_safe+safe_205926.5877+211135.6586	207
0Safe+0Safe_safe+safe_206014.5965+206014.5965	193
0Safe+0Safe_safe+safe_206014.5965+206141.1592	244
0Safe+0Safe_safe+safe_206014.5965+206175.1626	337
0Safe+0Safe_safe+safe_206014.5965+206180.1631	156
0Safe+0Safe_safe+safe_206014.5965+206276.1727	195
0Safe+0Safe_safe+safe_206014.5965+207086.1286	371
0Safe+0Safe_safe+safe_206014.5965+207133.1333	302
0Safe+0Safe_safe+safe_206014.5965+207268.1468	111
0Safe+0Safe_safe+safe_206014.5965+207272.1472	254
0Safe+0Safe_safe+safe_206014.5965+207295.1495	398
0Safe+0Safe_safe+safe_206014.5965+207412.862	291
0Safe+0Safe_safe+safe_206014.5965+207644.2345	274
0Safe+0Safe_safe+safe_206014.5965+207736.2437	313
0Safe+0Safe_safe+safe_206014.5965+207762.2463	183
0Safe+0Safe_safe+safe_206014.5965+207933.2634	175
0Safe+0Safe_safe+safe_206014.5965+208027.2728	374
0Safe+0Safe_safe+safe_206014.5965+208233.2934	210
0Safe+0Safe_safe+safe_206014.5965+208249.2950	508
0Safe+0Safe_safe+safe_206014.5965+208251.2952	254
0Safe+0Safe_safe+safe_206014.5965+208266.2967	323
0Safe+0Safe_safe+safe_206014.5965+208280.2981	304
0Safe+0Safe_safe+safe_206014.5965+208288.2989	342
0Safe+0Safe_safe+safe_206014.5965+208334.13	499
0Safe+0Safe_safe+safe_206014.5965+208691.451	297
0Safe+0Safe_safe+safe_206014.5965+208974.706	383
0Safe+0Safe_safe+safe_206014.5965+209014.742	247
0Safe+0Safe_safe+safe_206014.5965+209157.3858	470
0Safe+0Safe_safe+safe_206014.5965+209400.4101	389
0Safe+0Safe_safe+safe_206014.5965+209597.4298	237
0Safe+0Safe_safe+safe_206014.5965+209963.3164	203
0Safe+0Safe_safe+safe_206014.5965+209973.3174	397
0Safe+0Safe_safe+safe_206014.5965+209990.3191	337
0Safe+0Safe_safe+safe_206014.5965+210140.3341	574
0Safe+0Safe_safe+safe_206014.5965+210313.3514	190
0Safe+0Safe_safe+safe_206014.5965+210540.3741	398
0Safe+0Safe_safe+safe_206014.5965+210725.6176	238
0Safe+0Safe_safe+safe_206014.5965+210743.6194	219
0Safe+0Safe_safe+safe_206014.5965+210809.6260	389
0Safe+0Safe_safe+safe_206014.5965+210925.6376	253
0Safe+0Safe_safe+safe_206014.5965+210935.6386	381
0Safe+0Safe_safe+safe_206014.5965+210946.6397	333
0Safe+0Safe_safe+safe_206014.5965+211135.6586	249
0Safe+0Safe_safe+safe_206141.1592+206141.1592	83
0Safe+0Safe_safe+safe_206141.1592+206175.1626	326
0Safe+0Safe_safe+safe_206141.1592+206180.1631	201
0Safe+0Safe_safe+safe_206141.1592+206276.1727	223
0Safe+0Safe_safe+safe_206141.1592+207086.1286	515
0Safe+0Safe_safe+safe_206141.1592+207133.1333	473
0Safe+0Safe_safe+safe_206141.1592+207268.1468	146
0Safe+0Safe_safe+safe_206141.1592+207272.1472	285
0Safe+0Safe_safe+safe_206141.1592+207295.1495	260
0Safe+0Safe_safe+safe_206141.1592+207412.862	320
0Safe+0Safe_safe+safe_206141.1592+207644.2345	433
0Safe+0Safe_safe+safe_206141.1592+207736.2437	389
0Safe+0Safe_safe+safe_206141.1592+207762.2463	269
0Safe+0Safe_safe+safe_206141.1592+207933.2634	257
0Safe+0Safe_safe+safe_206141.1592+208027.2728	291
0Safe+0Safe_safe+safe_206141.1592+208233.2934	372
0Safe+0Safe_safe+safe_206141.1592+208249.2950	488
0Safe+0Safe_safe+safe_206141.1592+208251.2952	396
0Safe+0Safe_safe+safe_206141.1592+208266.2967	247
0Safe+0Safe_safe+safe_206141.1592+208280.2981	423
0Safe+0Safe_safe+safe_206141.1592+208288.2989	459
0Safe+0Safe_safe+safe_206141.1592+208334.13	296
0Safe+0Safe_safe+safe_206141.1592+208691.451	358
0Safe+0Safe_safe+safe_206141.1592+208974.706	335
0Safe+0Safe_safe+safe_206141.1592+209014.742	393
0Safe+0Safe_safe+safe_206141.1592+209157.3858	483
0Safe+0Safe_safe+safe_206141.1592+209400.4101	319
0Safe+0Safe_safe+safe_206141.1592+209597.4298	341
0Safe+0Safe_safe+safe_206141.1592+209963.3164	254
0Safe+0Safe_safe+safe_206141.1592+209973.3174	426
0Safe+0Safe_safe+safe_206141.1592+209990.3191	272
0Safe+0Safe_safe+safe_206141.1592+210140.3341	684
0Safe+0Safe_safe+safe_206141.1592+210313.3514	289
0Safe+0Safe_safe+safe_206141.1592+210540.3741	476
0Safe+0Safe_safe+safe_206141.1592+210725.6176	459
0Safe+0Safe_safe+safe_206141.1592+210743.6194	266
0Safe+0Safe_safe+safe_206141.1592+210809.6260	255
0Safe+0Safe_safe+safe_206141.1592+210925.6376	349
0Safe+0Safe_safe+safe_206141.1592+210935.6386	301
0Safe+0Safe_safe+safe_206141.1592+210946.6397	359
0Safe+0Safe_safe+safe_206141.1592+211135.6586	301
0Safe+0Safe_safe+safe_206175.1626+206175.1626	71
0Safe+0Safe_safe+safe_206175.1626+206180.1631	345
0Safe+0Safe_safe+safe_206175.1626+206276.1727	207
0Safe+0Safe_safe+safe_206175.1626+207086.1286	262
0Safe+0Safe_safe+safe_206175.1626+207133.1333	400
0Safe+0Safe_safe+safe_206175.1626+207268.1468	125
0Safe+0Safe_safe+safe_206175.1626+207272.1472	256
0Safe+0Safe_safe+safe_206175.1626+207295.1495	195
0Safe+0Safe_safe+safe_206175.1626+207412.862	356
0Safe+0Safe_safe+safe_206175.1626+207644.2345	281
0Safe+0Safe_safe+safe_206175.1626+207736.2437	264
0Safe+0Safe_safe+safe_206175.1626+207762.2463	404
0Safe+0Safe_safe+safe_206175.1626+207933.2634	215
0Safe+0Safe_safe+safe_206175.1626+208027.2728	162
0Safe+0Safe_safe+safe_206175.1626+208233.2934	271
0Safe+0Safe_safe+safe_206175.1626+208249.2950	331
0Safe+0Safe_safe+safe_206175.1626+208251.2952	323
0Safe+0Safe_safe+safe_206175.1626+208266.2967	273
0Safe+0Safe_safe+safe_206175.1626+208280.2981	215
0Safe+0Safe_safe+safe_206175.1626+208288.2989	327
0Safe+0Safe_safe+safe_206175.1626+208334.13	251
0Safe+0Safe_safe+safe_206175.1626+208691.451	404
0Safe+0Safe_safe+safe_206175.1626+208974.706	718
0Safe+0Safe_safe+safe_206175.1626+209014.742	320
0Safe+0Safe_safe+safe_206175.1626+209157.3858	321
0Safe+0Safe_safe+safe_206175.1626+209400.4101	379
0Safe+0Safe_safe+safe_206175.1626+209597.4298	276
0Safe+0Safe_safe+safe_206175.1626+209963.3164	195
0Safe+0Safe_safe+safe_206175.1626+209973.3174	416
0Safe+0Safe_safe+safe_206175.1626+209990.3191	385
0Safe+0Safe_safe+safe_206175.1626+210140.3341	446
0Safe+0Safe_safe+safe_206175.1626+210313.3514	297
0Safe+0Safe_safe+safe_206175.1626+210540.3741	335
0Safe+0Safe_safe+safe_206175.1626+210725.6176	213
0Safe+0Safe_safe+safe_206175.1626+210743.6194	160
0Safe+0Safe_safe+safe_206175.1626+210809.6260	332
0Safe+0Safe_safe+safe_206175.1626+210925.6376	154
0Safe+0Safe_safe+safe_206175.1626+210935.6386	210
0Safe+0Safe_safe+safe_206175.1626+210946.6397	162
0Safe+0Safe_safe+safe_206175.1626+211135.6586	404
0Safe+0Safe_safe+safe_206180.1631+206180.1631	107
0Safe+0Safe_safe+safe_206180.1631+206276.1727	165
0Safe+0Safe_safe+safe_206180.1631+207086.1286	372
0Safe+0Safe_safe+safe_206180.1631+207133.1333	416
0Safe+0Safe_safe+safe_206180.1631+207268.1468	142
0Safe+0Safe_safe+safe_206180.1631+207272.1472	376
0Safe+0Safe_safe+safe_206180.1631+207295.1495	236
0Safe+0Safe_safe+safe_206180.1631+207412.862	266
0Safe+0Safe_safe+safe_206180.1631+207644.2345	309
0Safe+0Safe_safe+safe_206180.1631+207736.2437	162
0Safe+0Safe_safe+safe_206180.1631+207762.2463	292
0Safe+0Safe_safe+safe_206180.1631+207933.2634	333
0Safe+0Safe_safe+safe_206180.1631+208027.2728	300
0Safe+0Safe_safe+safe_206180.1631+208233.2934	246
0Safe+0Safe_safe+safe_206180.1631+208249.2950	141
0Safe+0Safe_safe+safe_206180.1631+208251.2952	307
0Safe+0Safe_safe+safe_206180.1631+208266.2967	351
0Safe+0Safe_safe+safe_206180.1631+208280.2981	481
0Safe+0Safe_safe+safe_206180.1631+208288.2989	232
0Safe+0Safe_safe+safe_206180.1631+208334.13	349
0Safe+0Safe_safe+safe_206180.1631+208691.451	209
0Safe+0Safe_safe+safe_206180.1631+208974.706	284
0Safe+0Safe_safe+safe_206180.1631+209014.742	290
0Safe+0Safe_safe+safe_206180.1631+209157.3858	303
0Safe+0Safe_safe+safe_206180.1631+209400.4101	351
0Safe+0Safe_safe+safe_206180.1631+209597.4298	286
0Safe+0Safe_safe+safe_206180.1631+209963.3164	304
0Safe+0Safe_safe+safe_206180.1631+209973.3174	274
0Safe+0Safe_safe+safe_206180.1631+209990.3191	200
0Safe+0Safe_safe+safe_206180.1631+210140.3341	209
0Safe+0Safe_safe+safe_206180.1631+210313.3514	133
0Safe+0Safe_safe+safe_206180.1631+210540.3741	406
0Safe+0Safe_safe+safe_206180.1631+210725.6176	466
0Safe+0Safe_safe+safe_206180.1631+210743.6194	329
0Safe+0Safe_safe+safe_206180.1631+210809.6260	337
0Safe+0Safe_safe+safe_206180.1631+210925.6376	177
0Safe+0Safe_safe+safe_206180.1631+210935.6386	131
0Safe+0Safe_safe+safe_206180.1631+210946.6397	254
0Safe+0Safe_safe+safe_206180.1631+211135.6586	235
0Safe+0Safe_safe+safe_206276.1727+206276.1727	41
0Safe+0Safe_safe+safe_206276.1727+207086.1286	295
0Safe+0Safe_safe+safe_206276.1727+207133.1333	296
0Safe+0Safe_safe+safe_206276.1727+207268.1468	136
0Safe+0Safe_safe+safe_206276.1727+207272.1472	330
0Safe+0Safe_safe+safe_206276.1727+207295.1495	278
0Safe+0Safe_safe+safe_206276.1727+207412.862	257
0Safe+0Safe_safe+safe_206276.1727+207644.2345	424
0Safe+0Safe_safe+safe_206276.1727+207736.2437	441
0Safe+0Safe_safe+safe_206276.1727+207762.2463	246
0Safe+0Safe_safe+safe_206276.1727+207933.2634	246
0Safe+0Safe_safe+safe_206276.1727+208027.2728	102
0Safe+0Safe_safe+safe_206276.1727+208233.2934	180
0Safe+0Safe_safe+safe_206276.1727+208249.2950	299
0Safe+0Safe_safe+safe_206276.1727+208251.2952	268
0Safe+0Safe_safe+safe_206276.1727+208266.2967	255
0Safe+0Safe_safe+safe_206276.1727+208280.2981	383
0Safe+0Safe_safe+safe_206276.1727+208288.2989	275
0Safe+0Safe_safe+safe_206276.1727+208334.13	207
0Safe+0Safe_safe+safe_206276.1727+208691.451	211
0Safe+0Safe_safe+safe_206276.1727+208974.706	465
0Safe+0Safe_safe+safe_206276.1727+209014.742	261
0Safe+0Safe_safe+safe_206276.1727+209157.3858	362
0Safe+0Safe_safe+safe_206276.1727+209400.4101	227
0Safe+0Safe_safe+safe_206276.1727+209597.4298	291
0Safe+0Safe_safe+safe_206276.1727+209963.3164	214
0Safe+0Safe_safe+safe_206276.1727+209973.3174	447
0Safe+0Safe_safe+safe_206276.1727+209990.3191	141
0Safe+0Safe_safe+safe_206276.1727+210140.3341	205
0Safe+0Safe_safe+safe_206276.1727+210313.3514	213
0Safe+0Safe_safe+safe_206276.1727+210540.3741	201
0Safe+0Safe_safe+safe_206276.1727+210725.6176	177
0Safe+0Safe_safe+safe_206276.1727+210743.6194	252
0Safe+0Safe_safe+safe_206276.1727+210809.6260	252
0Safe+0Safe_safe+safe_206276.1727+210925.6376	200
0Safe+0Safe_safe+safe_206276.1727+210935.6386	181
0Safe+0Safe_safe+safe_206276.1727+210946.6397	246
0Safe+0Safe_safe+safe_206276.1727+211135.6586	224
0Safe+0Safe_safe+safe_207086.1286+207086.1286	111
0Safe+0Safe_safe+safe_207086.1286+207133.1333	593
0Safe+0Safe_safe+safe_207086.1286+207268.1468	151
0Safe+0Safe_safe+safe_207086.1286+207272.1472	288
0Safe+0Safe_safe+safe_207086.1286+207295.1495	419
0Safe+0Safe_safe+safe_207086.1286+207412.862	436
0Safe+0Safe_safe+safe_207086.1286+207644.2345	524
0Safe+0Safe_safe+safe_207086.1286+207736.2437	415
0Safe+0Safe_safe+safe_207086.1286+207762.2463	315
0Safe+0Safe_safe+safe_207086.1286+207933.2634	193
0Safe+0Safe_safe+safe_207086.1286+208027.2728	324
0Safe+0Safe_safe+safe_207086.1286+208233.2934	322
0Safe+0Safe_safe+safe_207086.1286+208249.2950	136
0Safe+0Safe_safe+safe_207086.1286+208251.2952	307
0Safe+0Safe_safe+safe_207086.1286+208266.2967	252
0Safe+0Safe_safe+safe_207086.1286+208280.2981	418
0Safe+0Safe_safe+safe_207086.1286+208288.2989	306
0Safe+0Safe_safe+safe_207086.1286+208334.13	215
0Safe+0Safe_safe+safe_207086.1286+208691.451	220
0Safe+0Safe_safe+safe_207086.1286+208974.706	348
0Safe+0Safe_safe+safe_207086.1286+209014.742	268
0Safe+0Safe_safe+safe_207086.1286+209157.3858	363
0Safe+0Safe_safe+safe_207086.1286+209400.4101	308
0Safe+0Safe_safe+safe_207086.1286+209597.4298	330
0Safe+0Safe_safe+safe_207086.1286+209963.3164	289
0Safe+0Safe_safe+safe_207086.1286+209973.3174	314
0Safe+0Safe_safe+safe_207086.1286+209990.3191	182
0Safe+0Safe_safe+safe_207086.1286+210140.3341	408
0Safe+0Safe_safe+safe_207086.1286+210313.3514	183
0Safe+0Safe_safe+safe_207086.1286+210540.3741	353
0Safe+0Safe_safe+safe_207086.1286+210725.6176	284
0Safe+0Safe_safe+safe_207086.1286+210743.6194	231
0Safe+0Safe_safe+safe_207086.1286+210809.6260	215
0Safe+0Safe_safe+safe_207086.1286+210925.6376	228
0Safe+0Safe_safe+safe_207086.1286+210935.6386	366
0Safe+0Safe_safe+safe_207086.1286+210946.6397	364
0Safe+0Safe_safe+safe_207086.1286+211135.6586	327
0Safe+0Safe_safe+safe_207133.1333+207133.1333	183
0Safe+0Safe_safe+safe_207133.1333+207268.1468	186
0Safe+0Safe_safe+safe_207133.1333+207272.1472	324
0Safe+0Safe_safe+safe_207133.1333+207295.1495	487
0Safe+0Safe_safe+safe_207133.1333+207412.862	346
0Safe+0Safe_safe+safe_207133.1333+207644.2345	354
0Safe+0Safe_safe+safe_207133.1333+207736.2437	358
0Safe+0Safe_safe+safe_207133.1333+207762.2463	251
0Safe+0Safe_safe+safe_207133.1333+207933.2634	454
0Safe+0Safe_safe+safe_207133.1333+208027.2728	213
0Safe+0Safe_safe+safe_207133.1333+208233.2934	301
0Safe+0Safe_safe+safe_207133.1333+208249.2950	410
0Safe+0Safe_safe+safe_207133.1333+208251.2952	344
0Safe+0Safe_safe+safe_207133.1333+208266.2967	345
0Safe+0Safe_safe+safe_207133.1333+208280.2981	530
0Safe+0Safe_safe+safe_207133.1333+208288.2989	285
0Safe+0Safe_safe+safe_207133.1333+208334.13	235
0Safe+0Safe_safe+safe_207133.1333+208691.451	350
0Safe+0Safe_safe+safe_207133.1333+208974.706	309
0Safe+0Safe_safe+safe_207133.1333+209014.742	220
0Safe+0Safe_safe+safe_207133.1333+209157.3858	541
0Safe+0Safe_safe+safe_207133.1333+209400.4101	487
0Safe+0Safe_safe+safe_207133.1333+209597.4298	392
0Safe+0Safe_safe+safe_207133.1333+209963.3164	318
0Safe+0Safe_safe+safe_207133.1333+209973.3174	506
0Safe+0Safe_safe+safe_207133.1333+209990.3191	165
0Safe+0Safe_safe+safe_207133.1333+210140.3341	435
0Safe+0Safe_safe+safe_207133.1333+210313.3514	509
0Safe+0Safe_safe+safe_207133.1333+210540.3741	560
0Safe+0Safe_safe+safe_207133.1333+210725.6176	362
0Safe+0Safe_safe+safe_207133.1333+210743.6194	298
0Safe+0Safe_safe+safe_207133.1333+210809.6260	189
0Safe+0Safe_safe+safe_207133.1333+210925.6376	231
0Safe+0Safe_safe+safe_207133.1333+210935.6386	387
0Safe+0Safe_safe+safe_207133.1333+210946.6397	292
0Safe+0Safe_safe+safe_207133.1333+211135.6586	285
0Safe+0Safe_safe+safe_207268.1468+207268.1468	32
0Safe+0Safe_safe+safe_207268.1468+207272.1472	238
0Safe+0Safe_safe+safe_207268.1468+207295.1495	327
0Safe+0Safe_safe+safe_207268.1468+207412.862	287
0Safe+0Safe_safe+safe_207268.1468+207644.2345	249
0Safe+0Safe_safe+safe_207268.1468+207736.2437	252
0Safe+0Safe_safe+safe_207268.1468+207762.2463	122
0Safe+0Safe_safe+safe_207268.1468+207933.2634	97
0Safe+0Safe_safe+safe_207268.1468+208027.2728	199
0Safe+0Safe_safe+safe_207268.1468+208233.2934	122
0Safe+0Safe_safe+safe_207268.1468+208249.2950	113
0Safe+0Safe_safe+safe_207268.1468+208251.2952	202
0Safe+0Safe_safe+safe_207268.1468+208266.2967	138
0Safe+0Safe_safe+safe_207268.1468+208280.2981	272
0Safe+0Safe_safe+safe_207268.1468+208288.2989	203
0Safe+0Safe_safe+safe_207268.1468+208334.13	195
0Safe+0Safe_safe+safe_207268.1468+208691.451	240
0Safe+0Safe_safe+safe_207268.1468+208974.706	401
0Safe+0Safe_safe+safe_207268.1468+209014.742	166
0Safe+0Safe_safe+safe_207268.1468+209157.3858	173
0Safe+0Safe_safe+safe_207268.1468+209400.4101	167
0Safe+0Safe_safe+safe_207268.1468+209597.4298	208
0Safe+0Safe_safe+safe_207268.1468+209963.3164	261
0Safe+0Safe_safe+safe_207268.1468+209973.3174	312
0Safe+0Safe_safe+safe_207268.1468+209990.3191	128
0Safe+0Safe_safe+safe_207268.1468+210140.3341	216
0Safe+0Safe_safe+safe_207268.1468+210313.3514	158
0Safe+0Safe_safe+safe_207268.1468+210540.3741	317
0Safe+0Safe_safe+safe_207268.1468+210725.6176	372
0Safe+0Safe_safe+safe_207268.1468+210743.6194	181
0Safe+0Safe_safe+safe_207268.1468+210809.6260	164
0Safe+0Safe_safe+safe_207268.1468+210925.6376	259
0Safe+0Safe_safe+safe_207268.1468+210935.6386	164
0Safe+0Safe_safe+safe_207268.1468+210946.6397	184
0Safe+0Safe_safe+safe_207268.1468+211135.6586	344
0Safe+0Safe_safe+safe_207272.1472+207272.1472	98
0Safe+0Safe_safe+safe_207272.1472+207295.1495	447
0Safe+0Safe_safe+safe_207272.1472+207412.862	202
0Safe+0Safe_safe+safe_207272.1472+207644.2345	281
0Safe+0Safe_safe+safe_207272.1472+207736.2437	301
0Safe+0Safe_safe+safe_207272.1472+207762.2463	257
0Safe+0Safe_safe+safe_207272.1472+207933.2634	333
0Safe+0Safe_safe+safe_207272.1472+208027.2728	196
0Safe+0Safe_safe+safe_207272.1472+208233.2934	345
0Safe+0Safe_safe+safe_207272.1472+208249.2950	327
0Safe+0Safe_safe+safe_207272.1472+208251.2952	292
0Safe+0Safe_safe+safe_207272.1472+208266.2967	259
0Safe+0Safe_safe+safe_207272.1472+208280.2981	427
0Safe+0Safe_safe+safe_207272.1472+208288.2989	284
0Safe+0Safe_safe+safe_207272.1472+208334.13	334
0Safe+0Safe_safe+safe_207272.1472+208691.451	275
0Safe+0Safe_safe+safe_207272.1472+208974.706	329
0Safe+0Safe_safe+safe_207272.1472+209014.742	260
0Safe+0Safe_safe+safe_207272.1472+209157.3858	201
0Safe+0Safe_safe+safe_207272.1472+209400.4101	402
0Safe+0Safe_safe+safe_207272.1472+209597.4298	194
0Safe+0Safe_safe+safe_207272.1472+209963.3164	302
0Safe+0Safe_safe+safe_207272.1472+209973.3174	305
0Safe+0Safe_safe+safe_207272.1472+209990.3191	255
0Safe+0Safe_safe+safe_207272.1472+210140.3341	352
0Safe+0Safe_safe+safe_207272.1472+210313.3514	377
0Safe+0Safe_safe+safe_207272.1472+210540.3741	352
0Safe+0Safe_safe+safe_207272.1472+210725.6176	685
0Safe+0Safe_safe+safe_207272.1472+210743.6194	323
0Safe+0Safe_safe+safe_207272.1472+210809.6260	332
0Safe+0Safe_safe+safe_207272.1472+210925.6376	286
0Safe+0Safe_safe+safe_207272.1472+210935.6386	509
0Safe+0Safe_safe+safe_207272.1472+210946.6397	333
0Safe+0Safe_safe+safe_207272.1472+211135.6586	254
0Safe+0Safe_safe+safe_207295.1495+207295.1495	87
0Safe+0Safe_safe+safe_207295.1495+207412.862	371
0Safe+0Safe_safe+safe_207295.1495+207644.2345	373
0Safe+0Safe_safe+safe_207295.1495+207736.2437	374
0Safe+0Safe_safe+safe_207295.1495+207762.2463	255
0Safe+0Safe_safe+safe_207295.1495+207933.2634	432
0Safe+0Safe_safe+safe_207295.1495+208027.2728	248
0Safe+0Safe_safe+safe_207295.1495+208233.2934	347
0Safe+0Safe_safe+safe_207295.1495+208249.2950	404
0Safe+0Safe_safe+safe_207295.1495+208251.2952	317
0Safe+0Safe_safe+safe_207295.1495+208266.2967	361
0Safe+0Safe_safe+safe_207295.1495+208280.2981	336
0Safe+0Safe_safe+safe_207295.1495+208288.2989	205
0Safe+0Safe_safe+safe_207295.1495+208334.13	250
0Safe+0Safe_safe+safe_207295.1495+208691.451	328
0Safe+0Safe_safe+safe_207295.1495+208974.706	430
0Safe+0Safe_safe+safe_207295.1495+209014.742	207
0Safe+0Safe_safe+safe_207295.1495+209157.3858	289
0Safe+0Safe_safe+safe_207295.1495+209400.4101	412
0Safe+0Safe_safe+safe_207295.1495+209597.4298	318
0Safe+0Safe_safe+safe_207295.1495+209963.3164	284
0Safe+0Safe_safe+safe_207295.1495+209973.3174	633
0Safe+0Safe_safe+safe_207295.1495+209990.3191	163
0Safe+0Safe_safe+safe_207295.1495+210140.3341	343
0Safe+0Safe_safe+safe_207295.1495+210313.3514	329
0Safe+0Safe_safe+safe_207295.1495+210540.3741	409
0Safe+0Safe_safe+safe_207295.1495+210725.6176	311
0Safe+0Safe_safe+safe_207295.1495+210743.6194	442
0Safe+0Safe_safe+safe_207295.1495+210809.6260	159
0Safe+0Safe_safe+safe_207295.1495+210925.6376	250
0Safe+0Safe_safe+safe_207295.1495+210935.6386	397
0Safe+0Safe_safe+safe_207295.1495+210946.6397	398
0Safe+0Safe_safe+safe_207295.1495+211135.6586	337
0Safe+0Safe_safe+safe_207412.862+207412.862	62
0Safe+0Safe_safe+safe_207412.862+207644.2345	336
0Safe+0Safe_safe+safe_207412.862+207736.2437	194
0Safe+0Safe_safe+safe_207412.862+207762.2463	262
0Safe+0Safe_safe+safe_207412.862+207933.2634	393
0Safe+0Safe_safe+safe_207412.862+208027.2728	190
0Safe+0Safe_safe+safe_207412.862+208233.2934	172
0Safe+0Safe_safe+safe_207412.862+208249.2950	237
0Safe+0Safe_safe+safe_207412.862+208251.2952	393
0Safe+0Safe_safe+safe_207412.862+208266.2967	251
0Safe+0Safe_safe+safe_207412.862+208280.2981	212
0Safe+0Safe_safe+safe_207412.862+208288.2989	193
0Safe+0Safe_safe+safe_207412.862+208334.13	306
0Safe+0Safe_safe+safe_207412.862+208691.451	148
0Safe+0Safe_safe+safe_207412.862+208974.706	311
0Safe+0Safe_safe+safe_207412.862+209014.742	230
0Safe+0Safe_safe+safe_207412.862+209157.3858	456
0Safe+0Safe_safe+safe_207412.862+209400.4101	394
0Safe+0Safe_safe+safe_207412.862+209597.4298	227
0Safe+0Safe_safe+safe_207412.862+209963.3164	255
0Safe+0Safe_safe+safe_207412.862+209973.3174	420
0Safe+0Safe_safe+safe_207412.862+209990.3191	287
0Safe+0Safe_safe+safe_207412.862+210140.3341	317
0Safe+0Safe_safe+safe_207412.862+210313.3514	523
0Safe+0Safe_safe+safe_207412.862+210540.3741	393
0Safe+0Safe_safe+safe_207412.862+210725.6176	302
0Safe+0Safe_safe+safe_207412.862+210743.6194	185
0Safe+0Safe_safe+safe_207412.862+210809.6260	327
0Safe+0Safe_safe+safe_207412.862+210925.6376	172
0Safe+0Safe_safe+safe_207412.862+210935.6386	448
0Safe+0Safe_safe+safe_207412.862+210946.6397	264
0Safe+0Safe_safe+safe_207412.862+211135.6586	196
0Safe+0Safe_safe+safe_207644.2345+207644.2345	254
0Safe+0Safe_safe+safe_207644.2345+207736.2437	229
0Safe+0Safe_safe+safe_207644.2345+207762.2463	327
0Safe+0Safe_safe+safe_207644.2345+207933.2634	260
0Safe+0Safe_safe+safe_207644.2345+208027.2728	337
0Safe+0Safe_safe+safe_207644.2345+208233.2934	388
0Safe+0Safe_safe+safe_207644.2345+208249.2950	333
0Safe+0Safe_safe+safe_207644.2345+208251.2952	355
0Safe+0Safe_safe+safe_207644.2345+208266.2967	296
0Safe+0Safe_safe+safe_207644.2345+208280.2981	413
0Safe+0Safe_safe+safe_207644.2345+208288.2989	457
0Safe+0Safe_safe+safe_207644.2345+208334.13	357
0Safe+0Safe_safe+safe_207644.2345+208691.451	365
0Safe+0Safe_safe+safe_207644.2345+208974.706	217
0Safe+0Safe_safe+safe_207644.2345+209014.742	251
0Safe+0Safe_safe+safe_207644.2345+209157.3858	274
0Safe+0Safe_safe+safe_207644.2345+209400.4101	404
0Safe+0Safe_safe+safe_207644.2345+209597.4298	465
0Safe+0Safe_safe+safe_207644.2345+209963.3164	251
0Safe+0Safe_safe+safe_207644.2345+209973.3174	553
0Safe+0Safe_safe+safe_207644.2345+209990.3191	286
0Safe+0Safe_safe+safe_207644.2345+210140.3341	477
0Safe+0Safe_safe+safe_207644.2345+210313.3514	316
0Safe+0Safe_safe+safe_207644.2345+210540.3741	420
0Safe+0Safe_safe+safe_207644.2345+210725.6176	306
0Safe+0Safe_safe+safe_207644.2345+210743.6194	263
0Safe+0Safe_safe+safe_207644.2345+210809.6260	211
0Safe+0Safe_safe+safe_207644.2345+210925.6376	401
0Safe+0Safe_safe+safe_207644.2345+210935.6386	225
0Safe+0Safe_safe+safe_207644.2345+210946.6397	391
0Safe+0Safe_safe+safe_207644.2345+211135.6586	293
0Safe+0Safe_safe+safe_207736.2437+207736.2437	66
0Safe+0Safe_safe+safe_207736.2437+207762.2463	276
0Safe+0Safe_safe+safe_207736.2437+207933.2634	360
0Safe+0Safe_safe+safe_207736.2437+208027.2728	194
0Safe+0Safe_safe+safe_207736.2437+208233.2934	259
0Safe+0Safe_safe+safe_207736.2437+208249.2950	353
0Safe+0Safe_safe+safe_207736.2437+208251.2952	123
0Safe+0Safe_safe+safe_207736.2437+208266.2967	569
0Safe+0Safe_safe+safe_207736.2437+208280.2981	287
0Safe+0Safe_safe+safe_207736.2437+208288.2989	286
0Safe+0Safe_safe+safe_207736.2437+208334.13	219
0Safe+0Safe_safe+safe_207736.2437+208691.451	313
0Safe+0Safe_safe+safe_207736.2437+208974.706	298
0Safe+0Safe_safe+safe_207736.2437+209014.742	310
0Safe+0Safe_safe+safe_207736.2437+209157.3858	330
0Safe+0Safe_safe+safe_207736.2437+209400.4101	333
0Safe+0Safe_safe+safe_207736.2437+209597.4298	313
0Safe+0Safe_safe+safe_207736.2437+209963.3164	372
0Safe+0Safe_safe+safe_207736.2437+209973.3174	322
0Safe+0Safe_safe+safe_207736.2437+209990.3191	341
0Safe+0Safe_safe+safe_207736.2437+210140.3341	425
0Safe+0Safe_safe+safe_207736.2437+210313.3514	150
0Safe+0Safe_safe+safe_207736.2437+210540.3741	460
0Safe+0Safe_safe+safe_207736.2437+210725.6176	341
0Safe+0Safe_safe+safe_207736.2437+210743.6194	225
0Safe+0Safe_safe+safe_207736.2437+210809.6260	153
0Safe+0Safe_safe+safe_207736.2437+210925.6376	182
0Safe+0Safe_safe+safe_207736.2437+210935.6386	231
0Safe+0Safe_safe+safe_207736.2437+210946.6397	246
0Safe+0Safe_safe+safe_207736.2437+211135.6586	308
0Safe+0Safe_safe+safe_207762.2463+207762.2463	102
0Safe+0Safe_safe+safe_207762.2463+207933.2634	146
0Safe+0Safe_safe+safe_207762.2463+208027.2728	275
0Safe+0Safe_safe+safe_207762.2463+208233.2934	194
0Safe+0Safe_safe+safe_207762.2463+208249.2950	344
0Safe+0Safe_safe+safe_207762.2463+208251.2952	180
0Safe+0Safe_safe+safe_207762.2463+208266.2967	198
0Safe+0Safe_safe+safe_207762.2463+208280.2981	368
0Safe+0Safe_safe+safe_207762.2463+208288.2989	294
0Safe+0Safe_safe+safe_207762.2463+208334.13	213
0Safe+0Safe_safe+safe_207762.2463+208691.451	214
0Safe+0Safe_safe+safe_207762.2463+208974.706	262
0Safe+0Safe_safe+safe_207762.2463+209014.742	174
0Safe+0Safe_safe+safe_207762.2463+209157.3858	302
0Safe+0Safe_safe+safe_207762.2463+209400.4101	259
0Safe+0Safe_safe+safe_207762.2463+209597.4298	220
0Safe+0Safe_safe+safe_207762.2463+209963.3164	174
0Safe+0Safe_safe+safe_207762.2463+209973.3174	387
0Safe+0Safe_safe+safe_207762.2463+209990.3191	243
0Safe+0Safe_safe+safe_207762.2463+210140.3341	429
0Safe+0Safe_safe+safe_207762.2463+210313.3514	172
0Safe+0Safe_safe+safe_207762.2463+210540.3741	301
0Safe+0Safe_safe+safe_207762.2463+210725.6176	216
0Safe+0Safe_safe+safe_207762.2463+210743.6194	263
0Safe+0Safe_safe+safe_207762.2463+210809.6260	229
0Safe+0Safe_safe+safe_207762.2463+210925.6376	223
0Safe+0Safe_safe+safe_207762.2463+210935.6386	231
0Safe+0Safe_safe+safe_207762.2463+210946.6397	334
0Safe+0Safe_safe+safe_207762.2463+211135.6586	241
0Safe+0Safe_safe+safe_207933.2634+207933.2634	139
0Safe+0Safe_safe+safe_207933.2634+208027.2728	206
0Safe+0Safe_safe+safe_207933.2634+208233.2934	254
0Safe+0Safe_safe+safe_207933.2634+208249.2950	165
0Safe+0Safe_safe+safe_207933.2634+208251.2952	385
0Safe+0Safe_safe+safe_207933.2634+208266.2967	404
0Safe+0Safe_safe+safe_207933.2634+208280.2981	287
0Safe+0Safe_safe+safe_207933.2634+208288.2989	420
0Safe+0Safe_safe+safe_207933.2634+208334.13	256
0Safe+0Safe_safe+safe_207933.2634+208691.451	157
0Safe+0Safe_safe+safe_207933.2634+208974.706	319
0Safe+0Safe_safe+safe_207933.2634+209014.742	102
0Safe+0Safe_safe+safe_207933.2634+209157.3858	219
0Safe+0Safe_safe+safe_207933.2634+209400.4101	276
0Safe+0Safe_safe+safe_207933.2634+209597.4298	257
0Safe+0Safe_safe+safe_207933.2634+209963.3164	205
0Safe+0Safe_safe+safe_207933.2634+209973.3174	388
0Safe+0Safe_safe+safe_207933.2634+209990.3191	291
0Safe+0Safe_safe+safe_207933.2634+210140.3341	363
0Safe+0Safe_safe+safe_207933.2634+210313.3514	329
0Safe+0Safe_safe+safe_207933.2634+210540.3741	370
0Safe+0Safe_safe+safe_207933.2634+210725.6176	280
0Safe+0Safe_safe+safe_207933.2634+210743.6194	178
0Safe+0Safe_safe+safe_207933.2634+210809.6260	419
0Safe+0Safe_safe+safe_207933.2634+210925.6376	193
0Safe+0Safe_safe+safe_207933.2634+210935.6386	251
0Safe+0Safe_safe+safe_207933.2634+210946.6397	235
0Safe+0Safe_safe+safe_207933.2634+211135.6586	318
0Safe+0Safe_safe+safe_208027.2728+208027.2728	59
0Safe+0Safe_safe+safe_208027.2728+208233.2934	162
0Safe+0Safe_safe+safe_208027.2728+208249.2950	310
0Safe+0Safe_safe+safe_208027.2728+208251.2952	432
0Safe+0Safe_safe+safe_208027.2728+208266.2967	283
0Safe+0Safe_safe+safe_208027.2728+208280.2981	299
0Safe+0Safe_safe+safe_208027.2728+208288.2989	282
0Safe+0Safe_safe+safe_208027.2728+208334.13	220
0Safe+0Safe_safe+safe_208027.2728+208691.451	181
0Safe+0Safe_safe+safe_208027.2728+208974.706	232
0Safe+0Safe_safe+safe_208027.2728+209014.742	235
0Safe+0Safe_safe+safe_208027.2728+209157.3858	323
0Safe+0Safe_safe+safe_208027.2728+209400.4101	283
0Safe+0Safe_safe+safe_208027.2728+209597.4298	221
0Safe+0Safe_safe+safe_208027.2728+209963.3164	110
0Safe+0Safe_safe+safe_208027.2728+209973.3174	395
0Safe+0Safe_safe+safe_208027.2728+209990.3191	164
0Safe+0Safe_safe+safe_208027.2728+210140.3341	307
0Safe+0Safe_safe+safe_208027.2728+210313.3514	156
0Safe+0Safe_safe+safe_208027.2728+210540.3741	321
0Safe+0Safe_safe+safe_208027.2728+210725.6176	219
0Safe+0Safe_safe+safe_208027.2728+210743.6194	209
0Safe+0Safe_safe+safe_208027.2728+210809.6260	400
0Safe+0Safe_safe+safe_208027.2728+210925.6376	234
0Safe+0Safe_safe+safe_208027.2728+210935.6386	171
0Safe+0Safe_safe+safe_208027.2728+210946.6397	221
0Safe+0Safe_safe+safe_208027.2728+211135.6586	261
0Safe+0Safe_safe+safe_208233.2934+208233.2934	61
0Safe+0Safe_safe+safe_208233.2934+208249.2950	348
0Safe+0Safe_safe+safe_208233.2934+208251.2952	276
0Safe+0Safe_safe+safe_208233.2934+208266.2967	293
0Safe+0Safe_safe+safe_208233.2934+208280.2981	414
0Safe+0Safe_safe+safe_208233.2934+208288.2989	285
0Safe+0Safe_safe+safe_208233.2934+208334.13	311
0Safe+0Safe_safe+safe_208233.2934+208691.451	186
0Safe+0Safe_safe+safe_208233.2934+208974.706	342
0Safe+0Safe_safe+safe_208233.2934+209014.742	178
0Safe+0Safe_safe+safe_208233.2934+209157.3858	252
0Safe+0Safe_safe+safe_208233.2934+209400.4101	206
0Safe+0Safe_safe+safe_208233.2934+209597.4298	292
0Safe+0Safe_safe+safe_208233.2934+209963.3164	226
0Safe+0Safe_safe+safe_208233.2934+209973.3174	594
0Safe+0Safe_safe+safe_208233.2934+209990.3191	132
0Safe+0Safe_safe+safe_208233.2934+210140.3341	437
0Safe+0Safe_safe+safe_208233.2934+210313.3514	306
0Safe+0Safe_safe+safe_208233.2934+210540.3741	376
0Safe+0Safe_safe+safe_208233.2934+210725.6176	234
0Safe+0Safe_safe+safe_208233.2934+210743.6194	298
0Safe+0Safe_safe+safe_208233.2934+210809.6260	242
0Safe+0Safe_safe+safe_208233.2934+210925.6376	195
0Safe+0Safe_safe+safe_208233.2934+210935.6386	153
0Safe+0Safe_safe+safe_208233.2934+210946.6397	272
0Safe+0Safe_safe+safe_208233.2934+211135.6586	243
0Safe+0Safe_safe+safe_208249.2950+208249.2950	116
0Safe+0Safe_safe+safe_208249.2950+208251.2952	208
0Safe+0Safe_safe+safe_208249.2950+208266.2967	295
0Safe+0Safe_safe+safe_208249.2950+208280.2981	359
0Safe+0Safe_safe+safe_208249.2950+208288.2989	356
0Safe+0Safe_safe+safe_208249.2950+208334.13	124
0Safe+0Safe_safe+safe_208249.2950+208691.451	322
0Safe+0Safe_safe+safe_208249.2950+208974.706	327
0Safe+0Safe_safe+safe_208249.2950+209014.742	411
0Safe+0Safe_safe+safe_208249.2950+209157.3858	343
0Safe+0Safe_safe+safe_208249.2950+209400.4101	394
0Safe+0Safe_safe+safe_208249.2950+209597.4298	255
0Safe+0Safe_safe+safe_208249.2950+209963.3164	461
0Safe+0Safe_safe+safe_208249.2950+209973.3174	279
0Safe+0Safe_safe+safe_208249.2950+209990.3191	291
0Safe+0Safe_safe+safe_208249.2950+210140.3341	440
0Safe+0Safe_safe+safe_208249.2950+210313.3514	272
0Safe+0Safe_safe+safe_208249.2950+210540.3741	285
0Safe+0Safe_safe+safe_208249.2950+210725.6176	391
0Safe+0Safe_safe+safe_208249.2950+210743.6194	413
0Safe+0Safe_safe+safe_208249.2950+210809.6260	211
0Safe+0Safe_safe+safe_208249.2950+210925.6376	218
0Safe+0Safe_safe+safe_208249.2950+210935.6386	165
0Safe+0Safe_safe+safe_208249.2950+210946.6397	263
0Safe+0Safe_safe+safe_208249.2950+211135.6586	395
0Safe+0Safe_safe+safe_208251.2952+208251.2952	65
0Safe+0Safe_safe+safe_208251.2952+208266.2967	418
0Safe+0Safe_safe+safe_208251.2952+208280.2981	335
0Safe+0Safe_safe+safe_208251.2952+208288.2989	303
0Safe+0Safe_safe+safe_208251.2952+208334.13	323
0Safe+0Safe_safe+safe_208251.2952+208691.451	267
0Safe+0Safe_safe+safe_208251.2952+208974.706	485
0Safe+0Safe_safe+safe_208251.2952+209014.742	207
0Safe+0Safe_safe+safe_208251.2952+209157.3858	1069
0Safe+0Safe_safe+safe_208251.2952+209400.4101	322
0Safe+0Safe_safe+safe_208251.2952+209597.4298	245
0Safe+0Safe_safe+safe_208251.2952+209963.3164	172
0Safe+0Safe_safe+safe_208251.2952+209973.3174	680
0Safe+0Safe_safe+safe_208251.2952+209990.3191	380
0Safe+0Safe_safe+safe_208251.2952+210140.3341	366
0Safe+0Safe_safe+safe_208251.2952+210313.3514	442
0Safe+0Safe_safe+safe_208251.2952+210540.3741	337
0Safe+0Safe_safe+safe_208251.2952+210725.6176	340
0Safe+0Safe_safe+safe_208251.2952+210743.6194	299
0Safe+0Safe_safe+safe_208251.2952+210809.6260	334
0Safe+0Safe_safe+safe_208251.2952+210925.6376	241
0Safe+0Safe_safe+safe_208251.2952+210935.6386	391
0Safe+0Safe_safe+safe_208251.2952+210946.6397	302
0Safe+0Safe_safe+safe_208251.2952+211135.6586	626
0Safe+0Safe_safe+safe_208266.2967+208266.2967	134
0Safe+0Safe_safe+safe_208266.2967+208280.2981	353
0Safe+0Safe_safe+safe_208266.2967+208288.2989	236
0Safe+0Safe_safe+safe_208266.2967+208334.13	267
0Safe+0Safe_safe+safe_208266.2967+208691.451	365
0Safe+0Safe_safe+safe_208266.2967+208974.706	291
0Safe+0Safe_safe+safe_208266.2967+209014.742	240
0Safe+0Safe_safe+safe_208266.2967+209157.3858	518
0Safe+0Safe_safe+safe_208266.2967+209400.4101	324
0Safe+0Safe_safe+safe_208266.2967+209597.4298	353
0Safe+0Safe_safe+safe_208266.2967+209963.3164	356
0Safe+0Safe_safe+safe_208266.2967+209973.3174	432
0Safe+0Safe_safe+safe_208266.2967+209990.3191	279
0Safe+0Safe_safe+safe_208266.2967+210140.3341	487
0Safe+0Safe_safe+safe_208266.2967+210313.3514	250
0Safe+0Safe_safe+safe_208266.2967+210540.3741	420
0Safe+0Safe_safe+safe_208266.2967+210725.6176	422
0Safe+0Safe_safe+safe_208266.2967+210743.6194	323
0Safe+0Safe_safe+safe_208266.2967+210809.6260	364
0Safe+0Safe_safe+safe_208266.2967+210925.6376	135
0Safe+0Safe_safe+safe_208266.2967+210935.6386	239
0Safe+0Safe_safe+safe_208266.2967+210946.6397	292
0Safe+0Safe_safe+safe_208266.2967+211135.6586	312
0Safe+0Safe_safe+safe_208280.2981+208280.2981	158
0Safe+0Safe_safe+safe_208280.2981+208288.2989	363
0Safe+0Safe_safe+safe_208280.2981+208334.13	402
0Safe+0Safe_safe+safe_208280.2981+208691.451	330
0Safe+0Safe_safe+safe_208280.2981+208974.706	354
0Safe+0Safe_safe+safe_208280.2981+209014.742	463
0Safe+0Safe_safe+safe_208280.2981+209157.3858	331
0Safe+0Safe_safe+safe_208280.2981+209400.4101	260
0Safe+0Safe_safe+safe_208280.2981+209597.4298	371
0Safe+0Safe_safe+safe_208280.2981+209963.3164	466
0Safe+0Safe_safe+safe_208280.2981+209973.3174	539
0Safe+0Safe_safe+safe_208280.2981+209990.3191	305
0Safe+0Safe_safe+safe_208280.2981+210140.3341	494
0Safe+0Safe_safe+safe_208280.2981+210313.3514	330
0Safe+0Safe_safe+safe_208280.2981+210540.3741	402
0Safe+0Safe_safe+safe_208280.2981+210725.6176	247
0Safe+0Safe_safe+safe_208280.2981+210743.6194	583
0Safe+0Safe_safe+safe_208280.2981+210809.6260	360
0Safe+0Safe_safe+safe_208280.2981+210925.6376	348
0Safe+0Safe_safe+safe_208280.2981+210935.6386	360
0Safe+0Safe_safe+safe_208280.2981+210946.6397	270
0Safe+0Safe_safe+safe_208280.2981+211135.6586	349
0Safe+0Safe_safe+safe_208288.2989+208288.2989	219
0Safe+0Safe_safe+safe_208288.2989+208334.13	270
0Safe+0Safe_safe+safe_208288.2989+208691.451	270
0Safe+0Safe_safe+safe_208288.2989+208974.706	418
0Safe+0Safe_safe+safe_208288.2989+209014.742	393
0Safe+0Safe_safe+safe_208288.2989+209157.3858	299
0Safe+0Safe_safe+safe_208288.2989+209400.4101	412
0Safe+0Safe_safe+safe_208288.2989+209597.4298	392
0Safe+0Safe_safe+safe_208288.2989+209963.3164	574
0Safe+0Safe_safe+safe_208288.2989+209973.3174	517
0Safe+0Safe_safe+safe_208288.2989+209990.3191	192
0Safe+0Safe_safe+safe_208288.2989+210140.3341	265
0Safe+0Safe_safe+safe_208288.2989+210313.3514	467
0Safe+0Safe_safe+safe_208288.2989+210540.3741	344
0Safe+0Safe_safe+safe_208288.2989+210725.6176	236
0Safe+0Safe_safe+safe_208288.2989+210743.6194	517
0Safe+0Safe_safe+safe_208288.2989+210809.6260	429
0Safe+0Safe_safe+safe_208288.2989+210925.6376	284
0Safe+0Safe_safe+safe_208288.2989+210935.6386	208
0Safe+0Safe_safe+safe_208288.2989+210946.6397	384
0Safe+0Safe_safe+safe_208288.2989+211135.6586	202
0Safe+0Safe_safe+safe_208334.13+208334.13	124
0Safe+0Safe_safe+safe_208334.13+208691.451	259
0Safe+0Safe_safe+safe_208334.13+208974.706	458
0Safe+0Safe_safe+safe_208334.13+209014.742	244
0Safe+0Safe_safe+safe_208334.13+209157.3858	383
0Safe+0Safe_safe+safe_208334.13+209400.4101	395
0Safe+0Safe_safe+safe_208334.13+209597.4298	297
0Safe+0Safe_safe+safe_208334.13+209963.3164	234
0Safe+0Safe_safe+safe_208334.13+209973.3174	313
0Safe+0Safe_safe+safe_208334.13+209990.3191	313
0Safe+0Safe_safe+safe_208334.13+210140.3341	369
0Safe+0Safe_safe+safe_208334.13+210313.3514	241
0Safe+0Safe_safe+safe_208334.13+210540.3741	381
0Safe+0Safe_safe+safe_208334.13+210725.6176	344
0Safe+0Safe_safe+safe_208334.13+210743.6194	245
0Safe+0Safe_safe+safe_208334.13+210809.6260	175
0Safe+0Safe_safe+safe_208334.13+210925.6376	306
0Safe+0Safe_safe+safe_208334.13+210935.6386	275
0Safe+0Safe_safe+safe_208334.13+210946.6397	260
0Safe+0Safe_safe+safe_208334.13+211135.6586	172
0Safe+0Safe_safe+safe_208691.451+208691.451	99
0Safe+0Safe_safe+safe_208691.451+208974.706	274
0Safe+0Safe_safe+safe_208691.451+209014.742	173
0Safe+0Safe_safe+safe_208691.451+209157.3858	431
0Safe+0Safe_safe+safe_208691.451+209400.4101	394
0Safe+0Safe_safe+safe_208691.451+209597.4298	308
0Safe+0Safe_safe+safe_208691.451+209963.3164	285
0Safe+0Safe_safe+safe_208691.451+209973.3174	377
0Safe+0Safe_safe+safe_208691.451+209990.3191	277
0Safe+0Safe_safe+safe_208691.451+210140.3341	298
0Safe+0Safe_safe+safe_208691.451+210313.3514	156
0Safe+0Safe_safe+safe_208691.451+210540.3741	305
0Safe+0Safe_safe+safe_208691.451+210725.6176	226
0Safe+0Safe_safe+safe_208691.451+210743.6194	206
0Safe+0Safe_safe+safe_208691.451+210809.6260	256
0Safe+0Safe_safe+safe_208691.451+210925.6376	327
0Safe+0Safe_safe+safe_208691.451+210935.6386	335
0Safe+0Safe_safe+safe_208691.451+210946.6397	156
0Safe+0Safe_safe+safe_208691.451+211135.6586	200
0Safe+0Safe_safe+safe_208974.706+208974.706	147
0Safe+0Safe_safe+safe_208974.706+209014.742	173
0Safe+0Safe_safe+safe_208974.706+209157.3858	348
0Safe+0Safe_safe+safe_208974.706+209400.4101	438
0Safe+0Safe_safe+safe_208974.706+209597.4298	309
0Safe+0Safe_safe+safe_208974.706+209963.3164	567
0Safe+0Safe_safe+safe_208974.706+209973.3174	423
0Safe+0Safe_safe+safe_208974.706+209990.3191	515
0Safe+0Safe_safe+safe_208974.706+210140.3341	332
0Safe+0Safe_safe+safe_208974.706+210313.3514	321
0Safe+0Safe_safe+safe_208974.706+210540.3741	640
0Safe+0Safe_safe+safe_208974.706+210725.6176	522
0Safe+0Safe_safe+safe_208974.706+210743.6194	379
0Safe+0Safe_safe+safe_208974.706+210809.6260	293
0Safe+0Safe_safe+safe_208974.706+210925.6376	276
0Safe+0Safe_safe+safe_208974.706+210935.6386	534
0Safe+0Safe_safe+safe_208974.706+210946.6397	369
0Safe+0Safe_safe+safe_208974.706+211135.6586	436
0Safe+0Safe_safe+safe_209014.742+209014.742	30
0Safe+0Safe_safe+safe_209014.742+209157.3858	243
0Safe+0Safe_safe+safe_209014.742+209400.4101	294
0Safe+0Safe_safe+safe_209014.742+209597.4298	407
0Safe+0Safe_safe+safe_209014.742+209963.3164	205
0Safe+0Safe_safe+safe_209014.742+209973.3174	271
0Safe+0Safe_safe+safe_209014.742+209990.3191	197
0Safe+0Safe_safe+safe_209014.742+210140.3341	320
0Safe+0Safe_safe+safe_209014.742+210313.3514	110
0Safe+0Safe_safe+safe_209014.742+210540.3741	307
0Safe+0Safe_safe+safe_209014.742+210725.6176	186
0Safe+0Safe_safe+safe_209014.742+210743.6194	203
0Safe+0Safe_safe+safe_209014.742+210809.6260	166
0Safe+0Safe_safe+safe_209014.742+210925.6376	187
0Safe+0Safe_safe+safe_209014.742+210935.6386	194
0Safe+0Safe_safe+safe_209014.742+210946.6397	375
0Safe+0Safe_safe+safe_209014.742+211135.6586	443
0Safe+0Safe_safe+safe_209157.3858+209157.3858	132
0Safe+0Safe_safe+safe_209157.3858+209400.4101	218
0Safe+0Safe_safe+safe_209157.3858+209597.4298	407
0Safe+0Safe_safe+safe_209157.3858+209963.3164	356
0Safe+0Safe_safe+safe_209157.3858+209973.3174	449
0Safe+0Safe_safe+safe_209157.3858+209990.3191	370
0Safe+0Safe_safe+safe_209157.3858+210140.3341	590
0Safe+0Safe_safe+safe_209157.3858+210313.3514	238
0Safe+0Safe_safe+safe_209157.3858+210540.3741	327
0Safe+0Safe_safe+safe_209157.3858+210725.6176	322
0Safe+0Safe_safe+safe_209157.3858+210743.6194	471
0Safe+0Safe_safe+safe_209157.3858+210809.6260	436
0Safe+0Safe_safe+safe_209157.3858+210925.6376	215
0Safe+0Safe_safe+safe_209157.3858+210935.6386	288
0Safe+0Safe_safe+safe_209157.3858+210946.6397	435
0Safe+0Safe_safe+safe_209157.3858+211135.6586	314
0Safe+0Safe_safe+safe_209400.4101+209400.4101	120
0Safe+0Safe_safe+safe_209400.4101+209597.4298	198
0Safe+0Safe_safe+safe_209400.4101+209963.3164	405
0Safe+0Safe_safe+safe_209400.4101+209973.3174	435
0Safe+0Safe_safe+safe_209400.4101+209990.3191	339
0Safe+0Safe_safe+safe_209400.4101+210140.3341	365
0Safe+0Safe_safe+safe_209400.4101+210313.3514	309
0Safe+0Safe_safe+safe_209400.4101+210540.3741	413
0Safe+0Safe_safe+safe_209400.4101+210725.6176	221
0Safe+0Safe_safe+safe_209400.4101+210743.6194	215
0Safe+0Safe_safe+safe_209400.4101+210809.6260	321
0Safe+0Safe_safe+safe_209400.4101+210925.6376	200
0Safe+0Safe_safe+safe_209400.4101+210935.6386	196
0Safe+0Safe_safe+safe_209400.4101+210946.6397	405
0Safe+0Safe_safe+safe_209400.4101+211135.6586	208
0Safe+0Safe_safe+safe_209597.4298+209597.4298	44
0Safe+0Safe_safe+safe_209597.4298+209963.3164	406
0Safe+0Safe_safe+safe_209597.4298+209973.3174	515
0Safe+0Safe_safe+safe_209597.4298+209990.3191	255
0Safe+0Safe_safe+safe_209597.4298+210140.3341	403
0Safe+0Safe_safe+safe_209597.4298+210313.3514	194
0Safe+0Safe_safe+safe_209597.4298+210540.3741	412
0Safe+0Safe_safe+safe_209597.4298+210725.6176	263
0Safe+0Safe_safe+safe_209597.4298+210743.6194	351
0Safe+0Safe_safe+safe_209597.4298+210809.6260	224
0Safe+0Safe_safe+safe_209597.4298+210925.6376	222
0Safe+0Safe_safe+safe_209597.4298+210935.6386	477
0Safe+0Safe_safe+safe_209597.4298+210946.6397	362
0Safe+0Safe_safe+safe_209597.4298+211135.6586	644
0Safe+0Safe_safe+safe_209963.3164+209963.3164	49
0Safe+0Safe_safe+safe_209963.3164+209973.3174	302
0Safe+0Safe_safe+safe_209963.3164+209990.3191	148
0Safe+0Safe_safe+safe_209963.3164+210140.3341	197
0Safe+0Safe_safe+safe_209963.3164+210313.3514	194
0Safe+0Safe_safe+safe_209963.3164+210540.3741	366
0Safe+0Safe_safe+safe_209963.3164+210725.6176	168
0Safe+0Safe_safe+safe_209963.3164+210743.6194	139
0Safe+0Safe_safe+safe_209963.3164+210809.6260	288
0Safe+0Safe_safe+safe_209963.3164+210925.6376	317
0Safe+0Safe_safe+safe_209963.3164+210935.6386	203
0Safe+0Safe_safe+safe_209963.3164+210946.6397	360
0Safe+0Safe_safe+safe_209963.3164+211135.6586	313
0Safe+0Safe_safe+safe_209973.3174+209973.3174	147
0Safe+0Safe_safe+safe_209973.3174+209990.3191	325
0Safe+0Safe_safe+safe_209973.3174+210140.3341	454
0Safe+0Safe_safe+safe_209973.3174+210313.3514	412
0Safe+0Safe_safe+safe_209973.3174+210540.3741	510
0Safe+0Safe_safe+safe_209973.3174+210725.6176	737
0Safe+0Safe_safe+safe_209973.3174+210743.6194	499
0Safe+0Safe_safe+safe_209973.3174+210809.6260	312
0Safe+0Safe_safe+safe_209973.3174+210925.6376	370
0Safe+0Safe_safe+safe_209973.3174+210935.6386	345
0Safe+0Safe_safe+safe_209973.3174+210946.6397	578
0Safe+0Safe_safe+safe_209973.3174+211135.6586	340
0Safe+0Safe_safe+safe_209990.3191+209990.3191	86
0Safe+0Safe_safe+safe_209990.3191+210140.3341	239
0Safe+0Safe_safe+safe_209990.3191+210313.3514	185
0Safe+0Safe_safe+safe_209990.3191+210540.3741	350
0Safe+0Safe_safe+safe_209990.3191+210725.6176	162
0Safe+0Safe_safe+safe_209990.3191+210743.6194	274
0Safe+0Safe_safe+safe_209990.3191+210809.6260	196
0Safe+0Safe_safe+safe_209990.3191+210925.6376	266
0Safe+0Safe_safe+safe_209990.3191+210935.6386	257
0Safe+0Safe_safe+safe_209990.3191+210946.6397	391
0Safe+0Safe_safe+safe_209990.3191+211135.6586	116
0Safe+0Safe_safe+safe_210140.3341+210140.3341	127
0Safe+0Safe_safe+safe_210140.3341+210313.3514	290
0Safe+0Safe_safe+safe_210140.3341+210540.3741	715
0Safe+0Safe_safe+safe_210140.3341+210725.6176	348
0Safe+0Safe_safe+safe_210140.3341+210743.6194	460
0Safe+0Safe_safe+safe_210140.3341+210809.6260	398
0Safe+0Safe_safe+safe_210140.3341+210925.6376	221
0Safe+0Safe_safe+safe_210140.3341+210935.6386	396
0Safe+0Safe_safe+safe_210140.3341+210946.6397	493
0Safe+0Safe_safe+safe_210140.3341+211135.6586	380
0Safe+0Safe_safe+safe_210313.3514+210313.3514	113
0Safe+0Safe_safe+safe_210313.3514+210540.3741	277
0Safe+0Safe_safe+safe_210313.3514+210725.6176	288
0Safe+0Safe_safe+safe_210313.3514+210743.6194	225
0Safe+0Safe_safe+safe_210313.3514+210809.6260	213
0Safe+0Safe_safe+safe_210313.3514+210925.6376	221
0Safe+0Safe_safe+safe_210313.3514+210935.6386	245
0Safe+0Safe_safe+safe_210313.3514+210946.6397	289
0Safe+0Safe_safe+safe_210313.3514+211135.6586	326
0Safe+0Safe_safe+safe_210540.3741+210540.3741	45
0Safe+0Safe_safe+safe_210540.3741+210725.6176	254
0Safe+0Safe_safe+safe_210540.3741+210743.6194	329
0Safe+0Safe_safe+safe_210540.3741+210809.6260	308
0Safe+0Safe_safe+safe_210540.3741+210925.6376	332
0Safe+0Safe_safe+safe_210540.3741+210935.6386	321
0Safe+0Safe_safe+safe_210540.3741+210946.6397	318
0Safe+0Safe_safe+safe_210540.3741+211135.6586	331
0Safe+0Safe_safe+safe_210725.6176+210725.6176	135
0Safe+0Safe_safe+safe_210725.6176+210743.6194	144
0Safe+0Safe_safe+safe_210725.6176+210809.6260	194
0Safe+0Safe_safe+safe_210725.6176+210925.6376	188
0Safe+0Safe_safe+safe_210725.6176+210935.6386	195
0Safe+0Safe_safe+safe_210725.6176+210946.6397	301
0Safe+0Safe_safe+safe_210725.6176+211135.6586	293
0Safe+0Safe_safe+safe_210743.6194+210743.6194	76
0Safe+0Safe_safe+safe_210743.6194+210809.6260	217
0Safe+0Safe_safe+safe_210743.6194+210925.6376	310
0Safe+0Safe_safe+safe_210743.6194+210935.6386	142
0Safe+0Safe_safe+safe_210743.6194+210946.6397	374
0Safe+0Safe_safe+safe_210743.6194+211135.6586	203
0Safe+0Safe_safe+safe_210809.6260+210809.6260	56
0Safe+0Safe_safe+safe_210809.6260+210925.6376	195
0Safe+0Safe_safe+safe_210809.6260+210935.6386	332
0Safe+0Safe_safe+safe_210809.6260+210946.6397	273
0Safe+0Safe_safe+safe_210809.6260+211135.6586	253
0Safe+0Safe_safe+safe_210925.6376+210925.6376	21
0Safe+0Safe_safe+safe_210925.6376+210935.6386	285
0Safe+0Safe_safe+safe_210925.6376+210946.6397	271
0Safe+0Safe_safe+safe_210925.6376+211135.6586	220
0Safe+0Safe_safe+safe_210935.6386+210935.6386	124
0Safe+0Safe_safe+safe_210935.6386+210946.6397	364
0Safe+0Safe_safe+safe_210935.6386+211135.6586	247
0Safe+0Safe_safe+safe_210946.6397+210946.6397	152
0Safe+0Safe_safe+safe_210946.6397+211135.6586	243
0Safe+0Safe_safe+safe_211135.6586+211135.6586	112
AKAP9+AKAP9_P1P2+P1P2_5225+5225	23
AKAP9+AKAP9_P1P2+P1P2_5225+5229	70
AKAP9+AKAP9_P1P2+P1P2_5225+5230	122
AKAP9+AKAP9_P1P2+P1P2_5229+5229	13
AKAP9+AKAP9_P1P2+P1P2_5229+5230	7
AKAP9+AKAP9_P1P2+P1P2_5230+5230	12
AKAP9+ANAPC2_P1P2+P1P2_5225+6711	33
AKAP9+ANAPC2_P1P2+P1P2_5225+6716	59
AKAP9+ANAPC2_P1P2+P1P2_5225+6719	2
AKAP9+ANAPC2_P1P2+P1P2_5229+6711	11
AKAP9+ANAPC2_P1P2+P1P2_5229+6716	38
AKAP9+ANAPC2_P1P2+P1P2_5229+6719	4
AKAP9+ANAPC2_P1P2+P1P2_5230+6711	28
AKAP9+ANAPC2_P1P2+P1P2_5230+6716	51
AKAP9+ANAPC2_P1P2+P1P2_5230+6719	12
AKAP9+AP1M1_P1P2+P1P2_5225+8191	6
AKAP9+AP1M1_P1P2+P1P2_5225+8195	18
AKAP9+AP1M1_P1P2+P1P2_5225+8199	108
AKAP9+AP1M1_P1P2+P1P2_5229+8191	10
AKAP9+AP1M1_P1P2+P1P2_5229+8195	40
AKAP9+AP1M1_P1P2+P1P2_5229+8199	68
AKAP9+AP1M1_P1P2+P1P2_5230+8191	11
AKAP9+AP1M1_P1P2+P1P2_5230+8195	43
AKAP9+AP1M1_P1P2+P1P2_5230+8199	8
AKAP9+AP2A1_P1P2+P1P2_5225+8241	92
AKAP9+AP2A1_P1P2+P1P2_5225+8243	68
AKAP9+AP2A1_P1P2+P1P2_5225+8244	1
AKAP9+AP2A1_P1P2+P1P2_5229+8241	29
AKAP9+AP2A1_P1P2+P1P2_5229+8243	42
AKAP9+AP2A1_P1P2+P1P2_5229+8244	6
AKAP9+AP2A1_P1P2+P1P2_5230+8241	66
AKAP9+AP2A1_P1P2+P1P2_5230+8243	72
AKAP9+AP2A1_P1P2+P1P2_5230+8244	54
AKAP9+ARL1_P1P2+P1P2_10491+5225	11
AKAP9+ARL1_P1P2+P1P2_10491+5229	7
AKAP9+ARL1_P1P2+P1P2_10491+5230	19
AKAP9+ARL1_P1P2+P1P2_10492+5225	6
AKAP9+ARL1_P1P2+P1P2_10492+5229	1
AKAP9+ARL1_P1P2+P1P2_10492+5230	1
AKAP9+ARL1_P1P2+P1P2_10498+5225	19
AKAP9+ARL1_P1P2+P1P2_10498+5229	17
AKAP9+ARL1_P1P2+P1P2_10498+5230	33
AKAP9+ASNA1_P1P2+P1P2_11971+5225	1172
AKAP9+ASNA1_P1P2+P1P2_11971+5229	861
AKAP9+ASNA1_P1P2+P1P2_11971+5230	1241
AKAP9+ASNA1_P1P2+P1P2_11973+5225	389
AKAP9+ASNA1_P1P2+P1P2_11973+5229	180
AKAP9+ASNA1_P1P2+P1P2_11973+5230	292
AKAP9+ASNA1_P1P2+P1P2_11977+5225	1972
AKAP9+ASNA1_P1P2+P1P2_11977+5229	860
AKAP9+ASNA1_P1P2+P1P2_11977+5230	687
AKAP9+ATP5A1_P1+P1P2_13072+5225	21
AKAP9+ATP5A1_P1+P1P2_13072+5229	18
AKAP9+ATP5A1_P1+P1P2_13072+5230	33
AKAP9+ATP5A1_P1+P1P2_13073+5225	58
AKAP9+ATP5A1_P1+P1P2_13073+5229	34
AKAP9+ATP5A1_P1+P1P2_13073+5230	31
AKAP9+ATP5A1_P1+P1P2_13076+5225	42
AKAP9+ATP5A1_P1+P1P2_13076+5229	49
AKAP9+ATP5A1_P1+P1P2_13076+5230	43
AKAP9+ATP5B_P1P2+P1P2_13092+5225	7
AKAP9+ATP5B_P1P2+P1P2_13092+5229	6
AKAP9+ATP5B_P1P2+P1P2_13092+5230	18
AKAP9+ATP5B_P1P2+P1P2_13096+5225	3
AKAP9+ATP5B_P1P2+P1P2_13096+5229	5
AKAP9+ATP5B_P1P2+P1P2_13096+5230	5
AKAP9+ATP5B_P1P2+P1P2_13098+5225	2
AKAP9+ATP5B_P1P2+P1P2_13098+5229	3
AKAP9+ATP5B_P1P2+P1P2_13098+5230	2
AKAP9+BAG6_P1P2+P1P2_14691+5225	300
AKAP9+BAG6_P1P2+P1P2_14691+5229	120
AKAP9+BAG6_P1P2+P1P2_14691+5230	317
AKAP9+BAG6_P1P2+P1P2_14692+5225	15
AKAP9+BAG6_P1P2+P1P2_14692+5229	10
AKAP9+BAG6_P1P2+P1P2_14692+5230	9
AKAP9+BAG6_P1P2+P1P2_14694+5225	140
AKAP9+BAG6_P1P2+P1P2_14694+5229	74
AKAP9+BAG6_P1P2+P1P2_14694+5230	160
AKAP9+CAMLG_P1P2+P1P2_25801+5225	644
AKAP9+CAMLG_P1P2+P1P2_25801+5229	446
AKAP9+CAMLG_P1P2+P1P2_25801+5230	378
AKAP9+CAMLG_P1P2+P1P2_25802+5225	984
AKAP9+CAMLG_P1P2+P1P2_25802+5229	820
AKAP9+CAMLG_P1P2+P1P2_25802+5230	532
AKAP9+CAMLG_P1P2+P1P2_25803+5225	768
AKAP9+CAMLG_P1P2+P1P2_25803+5229	370
AKAP9+CAMLG_P1P2+P1P2_25803+5230	594
AKAP9+CCNA2_P1P2+P1P2_29242+5225	115
AKAP9+CCNA2_P1P2+P1P2_29242+5229	36
AKAP9+CCNA2_P1P2+P1P2_29242+5230	35
AKAP9+CCNA2_P1P2+P1P2_29248+5225	5
AKAP9+CCNA2_P1P2+P1P2_29248+5229	3
AKAP9+CCNA2_P1P2+P1P2_29248+5230	106
AKAP9+CCNA2_P1P2+P1P2_29250+5225	31
AKAP9+CCNA2_P1P2+P1P2_29250+5229	4
AKAP9+CCNA2_P1P2+P1P2_29250+5230	3
AKAP9+CCT3_P1P2+P1P2_29751+5225	1
AKAP9+CCT3_P1P2+P1P2_29751+5229	1
AKAP9+CCT3_P1P2+P1P2_29751+5230	1
AKAP9+CCT3_P1P2+P1P2_29755+5225	1
AKAP9+CCT3_P1P2+P1P2_29755+5229	3
AKAP9+CCT3_P1P2+P1P2_29755+5230	2
AKAP9+CCT3_P1P2+P1P2_29758+5225	6
AKAP9+CCT3_P1P2+P1P2_29758+5229	9
AKAP9+CCT3_P1P2+P1P2_29758+5230	6
AKAP9+CCT4_P1P2+P1P2_29763+5225	20
AKAP9+CCT4_P1P2+P1P2_29763+5229	72
AKAP9+CCT4_P1P2+P1P2_29763+5230	7
AKAP9+CCT4_P1P2+P1P2_29768+5225	7
AKAP9+CCT4_P1P2+P1P2_29768+5229	1
AKAP9+CCT4_P1P2+P1P2_29768+5230	5
AKAP9+CCT4_P1P2+P1P2_29770+5225	3
AKAP9+CCT4_P1P2+P1P2_29770+5229	12
AKAP9+CCT4_P1P2+P1P2_29770+5230	13
AKAP9+CHAF1A_P1P2+P1P2_33862+5225	16
AKAP9+CHAF1A_P1P2+P1P2_33862+5229	15
AKAP9+CHAF1A_P1P2+P1P2_33862+5230	20
AKAP9+CHAF1A_P1P2+P1P2_33863+5225	46
AKAP9+CHAF1A_P1P2+P1P2_33863+5229	29
AKAP9+CHAF1A_P1P2+P1P2_33863+5230	6
AKAP9+CHAF1A_P1P2+P1P2_33869+5225	63
AKAP9+CHAF1A_P1P2+P1P2_33869+5229	2
AKAP9+CHAF1A_P1P2+P1P2_33869+5230	24
AKAP9+COG3_P1P2+P1P2_37961+5225	11
AKAP9+COG3_P1P2+P1P2_37961+5229	9
AKAP9+COG3_P1P2+P1P2_37961+5230	16
AKAP9+COG3_P1P2+P1P2_37963+5225	25
AKAP9+COG3_P1P2+P1P2_37963+5229	7
AKAP9+COG3_P1P2+P1P2_37963+5230	15
AKAP9+COG3_P1P2+P1P2_37964+5229	3
AKAP9+COG3_P1P2+P1P2_37964+5230	6
AKAP9+COG4_P1P2+P1P2_37974+5225	5
AKAP9+COG4_P1P2+P1P2_37974+5229	7
AKAP9+COG4_P1P2+P1P2_37974+5230	32
AKAP9+COG4_P1P2+P1P2_37976+5225	16
AKAP9+COG4_P1P2+P1P2_37976+5229	3
AKAP9+COG4_P1P2+P1P2_37976+5230	3
AKAP9+COG4_P1P2+P1P2_37980+5225	6
AKAP9+COG4_P1P2+P1P2_37980+5229	17
AKAP9+COG4_P1P2+P1P2_37980+5230	18
AKAP9+COPA_P1P2+P1P2_38732+5229	1
AKAP9+COPA_P1P2+P1P2_38732+5230	7
AKAP9+COPA_P1P2+P1P2_38734+5225	34
AKAP9+COPA_P1P2+P1P2_38734+5229	6
AKAP9+COPA_P1P2+P1P2_38734+5230	10
AKAP9+COPA_P1P2+P1P2_38738+5225	66
AKAP9+COPA_P1P2+P1P2_38738+5229	47
AKAP9+COPA_P1P2+P1P2_38738+5230	19
AKAP9+COPB1_P1P2+P1P2_38741+5229	1
AKAP9+COPB1_P1P2+P1P2_38741+5230	1
AKAP9+COPB1_P1P2+P1P2_38742+5225	2
AKAP9+COPB1_P1P2+P1P2_38742+5229	7
AKAP9+COPB1_P1P2+P1P2_38742+5230	1
AKAP9+COPB1_P1P2+P1P2_38743+5225	23
AKAP9+COPB1_P1P2+P1P2_38743+5230	3
AKAP9+COPS4_P1P2+P1P2_38833+5225	55
AKAP9+COPS4_P1P2+P1P2_38833+5229	26
AKAP9+COPS4_P1P2+P1P2_38833+5230	89
AKAP9+COPS4_P1P2+P1P2_38834+5225	75
AKAP9+COPS4_P1P2+P1P2_38834+5229	46
AKAP9+COPS4_P1P2+P1P2_38834+5230	139
AKAP9+COPS4_P1P2+P1P2_38835+5225	46
AKAP9+COPS4_P1P2+P1P2_38835+5229	6
AKAP9+COPS4_P1P2+P1P2_38835+5230	18
AKAP9+COX7C_P1P2+P1P2_39372+5225	31
AKAP9+COX7C_P1P2+P1P2_39372+5229	16
AKAP9+COX7C_P1P2+P1P2_39372+5230	18
AKAP9+COX7C_P1P2+P1P2_39375+5225	14
AKAP9+COX7C_P1P2+P1P2_39375+5229	5
AKAP9+COX7C_P1P2+P1P2_39375+5230	40
AKAP9+COX7C_P1P2+P1P2_39376+5225	74
AKAP9+COX7C_P1P2+P1P2_39376+5229	27
AKAP9+COX7C_P1P2+P1P2_39376+5230	88
AKAP9+DCAF13_P1P2+P1P2_44661+5225	8
AKAP9+DCAF13_P1P2+P1P2_44661+5229	8
AKAP9+DCAF13_P1P2+P1P2_44661+5230	55
AKAP9+DCAF13_P1P2+P1P2_44662+5225	76
AKAP9+DCAF13_P1P2+P1P2_44662+5229	29
AKAP9+DCAF13_P1P2+P1P2_44662+5230	23
AKAP9+DCAF13_P1P2+P1P2_44668+5225	14
AKAP9+DCAF13_P1P2+P1P2_44668+5229	1
AKAP9+DCAF13_P1P2+P1P2_44668+5230	4
AKAP9+DCTN1_P1P2+P1P2_45121+5225	34
AKAP9+DCTN1_P1P2+P1P2_45121+5229	21
AKAP9+DCTN1_P1P2+P1P2_45121+5230	12
AKAP9+DCTN1_P1P2+P1P2_45122+5225	202
AKAP9+DCTN1_P1P2+P1P2_45122+5229	157
AKAP9+DCTN1_P1P2+P1P2_45122+5230	122
AKAP9+DCTN1_P1P2+P1P2_45130+5225	99
AKAP9+DCTN1_P1P2+P1P2_45130+5229	82
AKAP9+DCTN1_P1P2+P1P2_45130+5230	63
AKAP9+EIF3A_P1P2+P1P2_5225+53046	12
AKAP9+EIF3A_P1P2+P1P2_5225+53047	9
AKAP9+EIF3A_P1P2+P1P2_5225+53050	19
AKAP9+EIF3A_P1P2+P1P2_5229+53046	8
AKAP9+EIF3A_P1P2+P1P2_5229+53047	5
AKAP9+EIF3A_P1P2+P1P2_5229+53050	19
AKAP9+EIF3A_P1P2+P1P2_5230+53046	7
AKAP9+EIF3A_P1P2+P1P2_5230+53047	41
AKAP9+EIF3A_P1P2+P1P2_5230+53050	35
AKAP9+EIF3D_P1P2+P1P2_5225+53082	18
AKAP9+EIF3D_P1P2+P1P2_5225+53087	4
AKAP9+EIF3D_P1P2+P1P2_5225+53090	27
AKAP9+EIF3D_P1P2+P1P2_5229+53082	18
AKAP9+EIF3D_P1P2+P1P2_5229+53090	3
AKAP9+EIF3D_P1P2+P1P2_5230+53082	2
AKAP9+EIF3D_P1P2+P1P2_5230+53090	16
AKAP9+EIF3H_P1P2+P1P2_5225+53121	1
AKAP9+EIF3H_P1P2+P1P2_5225+53124	54
AKAP9+EIF3H_P1P2+P1P2_5225+53128	24
AKAP9+EIF3H_P1P2+P1P2_5229+53121	5
AKAP9+EIF3H_P1P2+P1P2_5229+53124	18
AKAP9+EIF3H_P1P2+P1P2_5229+53128	7
AKAP9+EIF3H_P1P2+P1P2_5230+53121	2
AKAP9+EIF3H_P1P2+P1P2_5230+53124	4
AKAP9+EIF3H_P1P2+P1P2_5230+53128	11
AKAP9+EIF3L_P1P2+P1P2_5225+53161	24
AKAP9+EIF3L_P1P2+P1P2_5225+53164	49
AKAP9+EIF3L_P1P2+P1P2_5225+53165	98
AKAP9+EIF3L_P1P2+P1P2_5229+53161	40
AKAP9+EIF3L_P1P2+P1P2_5229+53164	111
AKAP9+EIF3L_P1P2+P1P2_5229+53165	80
AKAP9+EIF3L_P1P2+P1P2_5230+53161	46
AKAP9+EIF3L_P1P2+P1P2_5230+53164	90
AKAP9+EIF3L_P1P2+P1P2_5230+53165	96
AKAP9+EIF6_P1P2+P1P2_5225+53432	6
AKAP9+EIF6_P1P2+P1P2_5225+53433	10
AKAP9+EIF6_P1P2+P1P2_5225+53434	40
AKAP9+EIF6_P1P2+P1P2_5229+53432	17
AKAP9+EIF6_P1P2+P1P2_5229+53433	13
AKAP9+EIF6_P1P2+P1P2_5229+53434	4
AKAP9+EIF6_P1P2+P1P2_5230+53432	2
AKAP9+EIF6_P1P2+P1P2_5230+53433	13
AKAP9+EIF6_P1P2+P1P2_5230+53434	3
AKAP9+ERP44_P1P2+P1P2_5225+55852	776
AKAP9+ERP44_P1P2+P1P2_5225+55853	456
AKAP9+ERP44_P1P2+P1P2_5225+55856	928
AKAP9+ERP44_P1P2+P1P2_5229+55852	385
AKAP9+ERP44_P1P2+P1P2_5229+55853	384
AKAP9+ERP44_P1P2+P1P2_5229+55856	553
AKAP9+ERP44_P1P2+P1P2_5230+55852	482
AKAP9+ERP44_P1P2+P1P2_5230+55853	390
AKAP9+ERP44_P1P2+P1P2_5230+55856	594
AKAP9+GET4_P1P2+P1P2_5225+68261	83
AKAP9+GET4_P1P2+P1P2_5225+68262	129
AKAP9+GET4_P1P2+P1P2_5225+68263	55
AKAP9+GET4_P1P2+P1P2_5229+68261	85
AKAP9+GET4_P1P2+P1P2_5229+68262	138
AKAP9+GET4_P1P2+P1P2_5229+68263	94
AKAP9+GET4_P1P2+P1P2_5230+68261	91
AKAP9+GET4_P1P2+P1P2_5230+68262	145
AKAP9+GET4_P1P2+P1P2_5230+68263	26
AKAP9+GMDS_P1P2+P1P2_5225+69971	9522
AKAP9+GMDS_P1P2+P1P2_5225+69973	5798
AKAP9+GMDS_P1P2+P1P2_5225+69979	3945
AKAP9+GMDS_P1P2+P1P2_5229+69971	5552
AKAP9+GMDS_P1P2+P1P2_5229+69973	5642
AKAP9+GMDS_P1P2+P1P2_5229+69979	3662
AKAP9+GMDS_P1P2+P1P2_5230+69971	4253
AKAP9+GMDS_P1P2+P1P2_5230+69973	4372
AKAP9+GMDS_P1P2+P1P2_5230+69979	3928
AKAP9+GOLIM4_P1P2+P1P2_5225+70816	68
AKAP9+GOLIM4_P1P2+P1P2_5225+70817	107
AKAP9+GOLIM4_P1P2+P1P2_5225+70818	63
AKAP9+GOLIM4_P1P2+P1P2_5229+70816	20
AKAP9+GOLIM4_P1P2+P1P2_5229+70817	54
AKAP9+GOLIM4_P1P2+P1P2_5229+70818	26
AKAP9+GOLIM4_P1P2+P1P2_5230+70816	33
AKAP9+GOLIM4_P1P2+P1P2_5230+70817	38
AKAP9+GOLIM4_P1P2+P1P2_5230+70818	26
AKAP9+HNRNPK_P1P2+P1P2_5225+78784	39
AKAP9+HNRNPK_P1P2+P1P2_5225+78785	23
AKAP9+HNRNPK_P1P2+P1P2_5225+78786	9
AKAP9+HNRNPK_P1P2+P1P2_5229+78784	18
AKAP9+HNRNPK_P1P2+P1P2_5229+78785	21
AKAP9+HNRNPK_P1P2+P1P2_5229+78786	2
AKAP9+HNRNPK_P1P2+P1P2_5230+78784	9
AKAP9+HNRNPK_P1P2+P1P2_5230+78785	49
AKAP9+HNRNPK_P1P2+P1P2_5230+78786	1
AKAP9+IFFO1_P1+P1P2_5225+81592	44
AKAP9+IFFO1_P1+P1P2_5225+81594	139
AKAP9+IFFO1_P1+P1P2_5225+81595	50
AKAP9+IFFO1_P1+P1P2_5229+81592	56
AKAP9+IFFO1_P1+P1P2_5229+81594	69
AKAP9+IFFO1_P1+P1P2_5229+81595	6
AKAP9+IFFO1_P1+P1P2_5230+81592	71
AKAP9+IFFO1_P1+P1P2_5230+81594	23
AKAP9+IFFO1_P1+P1P2_5230+81595	9
AKAP9+KDM1A_P1P2+P1P2_5225+88511	9
AKAP9+KDM1A_P1P2+P1P2_5225+88513	24
AKAP9+KDM1A_P1P2+P1P2_5225+88515	80
AKAP9+KDM1A_P1P2+P1P2_5229+88511	14
AKAP9+KDM1A_P1P2+P1P2_5229+88513	13
AKAP9+KDM1A_P1P2+P1P2_5229+88515	16
AKAP9+KDM1A_P1P2+P1P2_5230+88511	2
AKAP9+KDM1A_P1P2+P1P2_5230+88513	15
AKAP9+KDM1A_P1P2+P1P2_5230+88515	6
AKAP9+MGAT5_P1P2+P1P2_105113+5225	42
AKAP9+MGAT5_P1P2+P1P2_105113+5229	32
AKAP9+MGAT5_P1P2+P1P2_105113+5230	4
AKAP9+MGAT5_P1P2+P1P2_105114+5225	143
AKAP9+MGAT5_P1P2+P1P2_105114+5229	183
AKAP9+MGAT5_P1P2+P1P2_105114+5230	58
AKAP9+MGAT5_P1P2+P1P2_105119+5225	7
AKAP9+MGAT5_P1P2+P1P2_105119+5229	11
AKAP9+MGAT5_P1P2+P1P2_105119+5230	9
AKAP9+MRPL51_P1P2+P1P2_108171+5225	45
AKAP9+MRPL51_P1P2+P1P2_108171+5229	24
AKAP9+MRPL51_P1P2+P1P2_108171+5230	45
AKAP9+MRPL51_P1P2+P1P2_108173+5225	13
AKAP9+MRPL51_P1P2+P1P2_108173+5229	7
AKAP9+MRPL51_P1P2+P1P2_108173+5230	6
AKAP9+MRPL51_P1P2+P1P2_108180+5225	46
AKAP9+MRPL51_P1P2+P1P2_108180+5229	41
AKAP9+MRPL51_P1P2+P1P2_108180+5230	19
AKAP9+MRPL54_P1P2+P1P2_108201+5225	19
AKAP9+MRPL54_P1P2+P1P2_108201+5229	51
AKAP9+MRPL54_P1P2+P1P2_108201+5230	40
AKAP9+MRPL54_P1P2+P1P2_108202+5225	36
AKAP9+MRPL54_P1P2+P1P2_108202+5229	32
AKAP9+MRPL54_P1P2+P1P2_108202+5230	18
AKAP9+MRPL54_P1P2+P1P2_108203+5225	19
AKAP9+MRPL54_P1P2+P1P2_108203+5229	30
AKAP9+MRPL54_P1P2+P1P2_108203+5230	35
AKAP9+MYBL2_P1P2+P1P2_110503+5225	1
AKAP9+MYBL2_P1P2+P1P2_110503+5230	1
AKAP9+MYBL2_P1P2+P1P2_110504+5225	22
AKAP9+MYBL2_P1P2+P1P2_110504+5229	18
AKAP9+MYBL2_P1P2+P1P2_110504+5230	13
AKAP9+MYBL2_P1P2+P1P2_110508+5225	27
AKAP9+MYBL2_P1P2+P1P2_110508+5229	10
AKAP9+MYBL2_P1P2+P1P2_110508+5230	4
AKAP9+NAA25_P1P2+P1P2_111815+5225	5
AKAP9+NAA25_P1P2+P1P2_111815+5229	14
AKAP9+NAA25_P1P2+P1P2_111815+5230	4
AKAP9+NAA25_P1P2+P1P2_111818+5225	39
AKAP9+NAA25_P1P2+P1P2_111818+5229	9
AKAP9+NAA25_P1P2+P1P2_111818+5230	9
AKAP9+NAA25_P1P2+P1P2_111819+5225	6
AKAP9+NAA25_P1P2+P1P2_111819+5230	4
AKAP9+PPP1R8_P1P2+P1P2_137244+5225	61
AKAP9+PPP1R8_P1P2+P1P2_137244+5229	62
AKAP9+PPP1R8_P1P2+P1P2_137244+5230	21
AKAP9+PPP1R8_P1P2+P1P2_137245+5225	17
AKAP9+PPP1R8_P1P2+P1P2_137245+5229	15
AKAP9+PPP1R8_P1P2+P1P2_137245+5230	53
AKAP9+PPP1R8_P1P2+P1P2_137246+5225	39
AKAP9+PPP1R8_P1P2+P1P2_137246+5229	42
AKAP9+PPP1R8_P1P2+P1P2_137246+5230	75
AKAP9+PRPF39_P1P2+P1P2_139311+5225	100
AKAP9+PRPF39_P1P2+P1P2_139311+5229	17
AKAP9+PRPF39_P1P2+P1P2_139311+5230	12
AKAP9+PRPF39_P1P2+P1P2_139314+5225	56
AKAP9+PRPF39_P1P2+P1P2_139314+5229	28
AKAP9+PRPF39_P1P2+P1P2_139314+5230	17
AKAP9+PRPF39_P1P2+P1P2_139317+5225	62
AKAP9+PRPF39_P1P2+P1P2_139317+5229	134
AKAP9+PRPF39_P1P2+P1P2_139317+5230	26
AKAP9+PSMA7_P1P2+P1P2_140543+5225	28
AKAP9+PSMA7_P1P2+P1P2_140543+5229	20
AKAP9+PSMA7_P1P2+P1P2_140543+5230	11
AKAP9+PSMA7_P1P2+P1P2_140545+5225	12
AKAP9+PSMA7_P1P2+P1P2_140545+5229	28
AKAP9+PSMA7_P1P2+P1P2_140545+5230	6
AKAP9+PSMA7_P1P2+P1P2_140550+5225	46
AKAP9+PSMA7_P1P2+P1P2_140550+5229	22
AKAP9+PSMA7_P1P2+P1P2_140550+5230	7
AKAP9+PSMB6_P1+P1P2_140631+5225	13
AKAP9+PSMB6_P1+P1P2_140631+5229	22
AKAP9+PSMB6_P1+P1P2_140631+5230	1
AKAP9+PSMB6_P1+P1P2_140633+5225	1
AKAP9+PSMB6_P1+P1P2_140633+5229	2
AKAP9+PSMB6_P1+P1P2_140633+5230	4
AKAP9+PSMC1_P1P2+P1P2_140694+5225	20
AKAP9+PSMC1_P1P2+P1P2_140694+5229	10
AKAP9+PSMC1_P1P2+P1P2_140694+5230	28
AKAP9+PSMC1_P1P2+P1P2_140698+5225	11
AKAP9+PSMC1_P1P2+P1P2_140698+5229	19
AKAP9+PSMC1_P1P2+P1P2_140698+5230	10
AKAP9+PSMC1_P1P2+P1P2_140699+5225	14
AKAP9+PSMC1_P1P2+P1P2_140699+5229	59
AKAP9+PSMC1_P1P2+P1P2_140699+5230	42
AKAP9+PSMC6_P1P2+P1P2_140752+5225	6
AKAP9+PSMC6_P1P2+P1P2_140752+5229	12
AKAP9+PSMC6_P1P2+P1P2_140752+5230	24
AKAP9+PSMC6_P1P2+P1P2_140754+5225	4
AKAP9+PSMC6_P1P2+P1P2_140754+5229	3
AKAP9+PSMC6_P1P2+P1P2_140754+5230	9
AKAP9+PSMC6_P1P2+P1P2_140756+5225	2
AKAP9+PSMC6_P1P2+P1P2_140756+5229	6
AKAP9+PSMC6_P1P2+P1P2_140756+5230	8
AKAP9+PSMD11_P1P2+P1P2_140781+5225	9
AKAP9+PSMD11_P1P2+P1P2_140781+5229	41
AKAP9+PSMD11_P1P2+P1P2_140781+5230	9
AKAP9+PSMD11_P1P2+P1P2_140782+5229	20
AKAP9+PSMD11_P1P2+P1P2_140782+5230	17
AKAP9+PSMD11_P1P2+P1P2_140783+5229	2
AKAP9+PSMD1_P1P2+P1P2_140762+5225	2
AKAP9+PSMD1_P1P2+P1P2_140762+5229	26
AKAP9+PSMD1_P1P2+P1P2_140765+5225	84
AKAP9+PSMD1_P1P2+P1P2_140765+5229	59
AKAP9+PSMD1_P1P2+P1P2_140765+5230	13
AKAP9+PSMD1_P1P2+P1P2_140766+5225	89
AKAP9+PSMD1_P1P2+P1P2_140766+5229	22
AKAP9+PSMD1_P1P2+P1P2_140766+5230	34
AKAP9+PSMD2_P1P2+P1P2_140827+5225	16
AKAP9+PSMD2_P1P2+P1P2_140827+5229	2
AKAP9+PSMD2_P1P2+P1P2_140827+5230	9
AKAP9+PSMD2_P1P2+P1P2_140829+5225	36
AKAP9+PSMD2_P1P2+P1P2_140829+5229	28
AKAP9+PSMD2_P1P2+P1P2_140829+5230	29
AKAP9+PSMD2_P1P2+P1P2_140830+5225	32
AKAP9+PSMD2_P1P2+P1P2_140830+5229	16
AKAP9+PSMD2_P1P2+P1P2_140830+5230	12
AKAP9+PSMD3_P1P2+P1P2_140835+5225	7
AKAP9+PSMD3_P1P2+P1P2_140835+5229	13
AKAP9+PSMD3_P1P2+P1P2_140835+5230	2
AKAP9+PSMD3_P1P2+P1P2_140836+5225	25
AKAP9+PSMD3_P1P2+P1P2_140836+5229	42
AKAP9+PSMD3_P1P2+P1P2_140836+5230	17
AKAP9+PSMD3_P1P2+P1P2_140837+5225	26
AKAP9+PSMD3_P1P2+P1P2_140837+5229	4
AKAP9+PSMD3_P1P2+P1P2_140837+5230	20
AKAP9+PTPN1_P1P2+P1P2_141802+5225	17
AKAP9+PTPN1_P1P2+P1P2_141802+5229	8
AKAP9+PTPN1_P1P2+P1P2_141802+5230	26
AKAP9+PTPN1_P1P2+P1P2_141809+5225	25
AKAP9+PTPN1_P1P2+P1P2_141809+5229	5
AKAP9+PTPN1_P1P2+P1P2_141809+5230	8
AKAP9+PTPN1_P1P2+P1P2_141810+5225	37
AKAP9+PTPN1_P1P2+P1P2_141810+5229	31
AKAP9+PTPN1_P1P2+P1P2_141810+5230	35
AKAP9+RAB14_P1P2+P1P2_143241+5225	177
AKAP9+RAB14_P1P2+P1P2_143241+5229	149
AKAP9+RAB14_P1P2+P1P2_143241+5230	83
AKAP9+RAB14_P1P2+P1P2_143243+5225	311
AKAP9+RAB14_P1P2+P1P2_143243+5229	180
AKAP9+RAB14_P1P2+P1P2_143243+5230	224
AKAP9+RAB14_P1P2+P1P2_143246+5225	482
AKAP9+RAB14_P1P2+P1P2_143246+5229	292
AKAP9+RAB14_P1P2+P1P2_143246+5230	296
AKAP9+RAD21_P1P2+P1P2_144081+5225	20
AKAP9+RAD21_P1P2+P1P2_144081+5229	1
AKAP9+RAD21_P1P2+P1P2_144081+5230	4
AKAP9+RAD21_P1P2+P1P2_144082+5225	9
AKAP9+RAD21_P1P2+P1P2_144082+5229	19
AKAP9+RAD21_P1P2+P1P2_144082+5230	10
AKAP9+RAD21_P1P2+P1P2_144087+5225	3
AKAP9+RAD21_P1P2+P1P2_144087+5229	59
AKAP9+RAD21_P1P2+P1P2_144087+5230	27
AKAP9+RPL35A_P1P2+P1P2_150911+5225	32
AKAP9+RPL35A_P1P2+P1P2_150911+5229	13
AKAP9+RPL35A_P1P2+P1P2_150911+5230	12
AKAP9+RPL35A_P1P2+P1P2_150913+5225	5
AKAP9+RPL35A_P1P2+P1P2_150913+5229	28
AKAP9+RPL35A_P1P2+P1P2_150913+5230	15
AKAP9+RPL35A_P1P2+P1P2_150919+5229	3
AKAP9+RPL35A_P1P2+P1P2_150919+5230	2
AKAP9+RPL35_P1P2+P1P2_150904+5225	98
AKAP9+RPL35_P1P2+P1P2_150904+5229	38
AKAP9+RPL35_P1P2+P1P2_150904+5230	117
AKAP9+RPL35_P1P2+P1P2_150905+5225	28
AKAP9+RPL35_P1P2+P1P2_150905+5229	33
AKAP9+RPL35_P1P2+P1P2_150905+5230	24
AKAP9+RPL35_P1P2+P1P2_150909+5225	36
AKAP9+RPL35_P1P2+P1P2_150909+5229	42
AKAP9+RPL35_P1P2+P1P2_150909+5230	7
AKAP9+RPL4_P1P2+P1P2_151021+5225	16
AKAP9+RPL4_P1P2+P1P2_151021+5229	1
AKAP9+RPL4_P1P2+P1P2_151021+5230	2
AKAP9+RPL4_P1P2+P1P2_151025+5225	11
AKAP9+RPL4_P1P2+P1P2_151025+5229	5
AKAP9+RPL4_P1P2+P1P2_151025+5230	46
AKAP9+RPL4_P1P2+P1P2_151030+5229	36
AKAP9+RPL4_P1P2+P1P2_151030+5230	17
AKAP9+RPL7L1_P1P2+P1P2_151088+5225	35
AKAP9+RPL7L1_P1P2+P1P2_151088+5229	28
AKAP9+RPL7L1_P1P2+P1P2_151088+5230	25
AKAP9+RPL7L1_P1P2+P1P2_151089+5225	8
AKAP9+RPL7L1_P1P2+P1P2_151089+5229	13
AKAP9+RPL7L1_P1P2+P1P2_151089+5230	4
AKAP9+RPL7L1_P1P2+P1P2_151090+5230	2
AKAP9+RPS6_P1P2+P1P2_151611+5225	1
AKAP9+RPS6_P1P2+P1P2_151611+5229	1
AKAP9+RPS6_P1P2+P1P2_151611+5230	5
AKAP9+RPS6_P1P2+P1P2_151619+5225	5
AKAP9+RPS6_P1P2+P1P2_151619+5229	14
AKAP9+RPS6_P1P2+P1P2_151619+5230	1
AKAP9+RPS6_P1P2+P1P2_151620+5225	23
AKAP9+RPS6_P1P2+P1P2_151620+5229	2
AKAP9+RPS6_P1P2+P1P2_151620+5230	19
AKAP9+RRM1_P1P2+P1P2_151953+5225	2
AKAP9+RRM1_P1P2+P1P2_151954+5225	16
AKAP9+RRM1_P1P2+P1P2_151954+5229	24
AKAP9+RRM1_P1P2+P1P2_151954+5230	2
AKAP9+RRM1_P1P2+P1P2_151959+5225	9
AKAP9+RRM1_P1P2+P1P2_151959+5229	1
AKAP9+RRM1_P1P2+P1P2_151959+5230	15
AKAP9+RRS1_P1P2+P1P2_152084+5225	44
AKAP9+RRS1_P1P2+P1P2_152084+5229	8
AKAP9+RRS1_P1P2+P1P2_152084+5230	77
AKAP9+RRS1_P1P2+P1P2_152086+5229	9
AKAP9+RRS1_P1P2+P1P2_152086+5230	14
AKAP9+RRS1_P1P2+P1P2_152090+5225	14
AKAP9+RRS1_P1P2+P1P2_152090+5229	13
AKAP9+RRS1_P1P2+P1P2_152090+5230	29
AKAP9+RTF1_P1P2+P1P2_152461+5225	16
AKAP9+RTF1_P1P2+P1P2_152461+5229	20
AKAP9+RTF1_P1P2+P1P2_152461+5230	10
AKAP9+RTF1_P1P2+P1P2_152462+5225	16
AKAP9+RTF1_P1P2+P1P2_152462+5229	2
AKAP9+RTF1_P1P2+P1P2_152462+5230	11
AKAP9+RTF1_P1P2+P1P2_152466+5225	23
AKAP9+RTF1_P1P2+P1P2_152466+5229	14
AKAP9+RTF1_P1P2+P1P2_152466+5230	3
AKAP9+SAMM50_P1P2+P1P2_153753+5225	1
AKAP9+SAMM50_P1P2+P1P2_153753+5229	10
AKAP9+SAMM50_P1P2+P1P2_153753+5230	2
AKAP9+SAMM50_P1P2+P1P2_153755+5225	15
AKAP9+SAMM50_P1P2+P1P2_153755+5229	14
AKAP9+SAMM50_P1P2+P1P2_153755+5230	3
AKAP9+SAMM50_P1P2+P1P2_153759+5225	129
AKAP9+SAMM50_P1P2+P1P2_153759+5229	21
AKAP9+SAMM50_P1P2+P1P2_153759+5230	12
AKAP9+SARS_P1P2+P1P2_153918+5225	95
AKAP9+SARS_P1P2+P1P2_153918+5229	85
AKAP9+SARS_P1P2+P1P2_153918+5230	93
AKAP9+SARS_P1P2+P1P2_153919+5225	11
AKAP9+SARS_P1P2+P1P2_153919+5229	11
AKAP9+SARS_P1P2+P1P2_153919+5230	22
AKAP9+SARS_P1P2+P1P2_153920+5225	14
AKAP9+SARS_P1P2+P1P2_153920+5229	6
AKAP9+SARS_P1P2+P1P2_153920+5230	3
AKAP9+SCFD1_P1P2+P1P2_154422+5225	3
AKAP9+SCFD1_P1P2+P1P2_154422+5229	8
AKAP9+SCFD1_P1P2+P1P2_154422+5230	3
AKAP9+SCFD1_P1P2+P1P2_154424+5225	120
AKAP9+SCFD1_P1P2+P1P2_154424+5229	167
AKAP9+SCFD1_P1P2+P1P2_154424+5230	153
AKAP9+SCFD1_P1P2+P1P2_154425+5225	89
AKAP9+SCFD1_P1P2+P1P2_154425+5229	116
AKAP9+SCFD1_P1P2+P1P2_154425+5230	52
AKAP9+SEC22B_P1P2+P1P2_155541+5225	592
AKAP9+SEC22B_P1P2+P1P2_155541+5229	337
AKAP9+SEC22B_P1P2+P1P2_155541+5230	384
AKAP9+SEC22B_P1P2+P1P2_155545+5225	228
AKAP9+SEC22B_P1P2+P1P2_155545+5229	70
AKAP9+SEC22B_P1P2+P1P2_155545+5230	176
AKAP9+SEC22B_P1P2+P1P2_155549+5225	540
AKAP9+SEC22B_P1P2+P1P2_155549+5229	301
AKAP9+SEC22B_P1P2+P1P2_155549+5230	258
AKAP9+SEC23B_P1P2+P1P2_155571+5225	2461
AKAP9+SEC23B_P1P2+P1P2_155571+5229	1941
AKAP9+SEC23B_P1P2+P1P2_155571+5230	1513
AKAP9+SEC23B_P1P2+P1P2_155572+5225	1836
AKAP9+SEC23B_P1P2+P1P2_155572+5229	986
AKAP9+SEC23B_P1P2+P1P2_155572+5230	1246
AKAP9+SEC23B_P1P2+P1P2_155573+5225	2075
AKAP9+SEC23B_P1P2+P1P2_155573+5229	1208
AKAP9+SEC23B_P1P2+P1P2_155573+5230	1198
AKAP9+SEC23IP_P1P2+P1P2_155583+5225	383
AKAP9+SEC23IP_P1P2+P1P2_155583+5229	509
AKAP9+SEC23IP_P1P2+P1P2_155583+5230	502
AKAP9+SEC23IP_P1P2+P1P2_155585+5225	873
AKAP9+SEC23IP_P1P2+P1P2_155585+5229	314
AKAP9+SEC23IP_P1P2+P1P2_155585+5230	670
AKAP9+SEC23IP_P1P2+P1P2_155586+5225	1527
AKAP9+SEC23IP_P1P2+P1P2_155586+5229	888
AKAP9+SEC23IP_P1P2+P1P2_155586+5230	1280
AKAP9+SEC24A_P1P2+P1P2_155592+5225	548
AKAP9+SEC24A_P1P2+P1P2_155592+5229	173
AKAP9+SEC24A_P1P2+P1P2_155592+5230	304
AKAP9+SEC24A_P1P2+P1P2_155593+5225	268
AKAP9+SEC24A_P1P2+P1P2_155593+5229	143
AKAP9+SEC24A_P1P2+P1P2_155593+5230	102
AKAP9+SEC24A_P1P2+P1P2_155595+5225	405
AKAP9+SEC24A_P1P2+P1P2_155595+5229	162
AKAP9+SEC24A_P1P2+P1P2_155595+5230	284
AKAP9+SEC24B_P1P2+P1P2_155604+5225	236
AKAP9+SEC24B_P1P2+P1P2_155604+5229	320
AKAP9+SEC24B_P1P2+P1P2_155604+5230	152
AKAP9+SEC24B_P1P2+P1P2_155605+5225	171
AKAP9+SEC24B_P1P2+P1P2_155605+5229	113
AKAP9+SEC24B_P1P2+P1P2_155605+5230	89
AKAP9+SEC24B_P1P2+P1P2_155608+5225	370
AKAP9+SEC24B_P1P2+P1P2_155608+5229	235
AKAP9+SEC24B_P1P2+P1P2_155608+5230	170
AKAP9+SEC24C_P1P2+P1P2_155612+5225	2707
AKAP9+SEC24C_P1P2+P1P2_155612+5229	1106
AKAP9+SEC24C_P1P2+P1P2_155612+5230	1424
AKAP9+SEC24C_P1P2+P1P2_155613+5225	2036
AKAP9+SEC24C_P1P2+P1P2_155613+5229	1187
AKAP9+SEC24C_P1P2+P1P2_155613+5230	1704
AKAP9+SEC24C_P1P2+P1P2_155617+5225	2733
AKAP9+SEC24C_P1P2+P1P2_155617+5229	1371
AKAP9+SEC24C_P1P2+P1P2_155617+5230	1851
AKAP9+SF3A1_P1+P1P2_157341+5225	4
AKAP9+SF3A1_P1+P1P2_157341+5230	2
AKAP9+SF3A1_P1+P1P2_157342+5225	1
AKAP9+SF3A1_P1+P1P2_157342+5230	7
AKAP9+SF3A1_P1+P1P2_157347+5225	37
AKAP9+SF3A1_P1+P1P2_157347+5229	12
AKAP9+SF3A1_P1+P1P2_157347+5230	58
AKAP9+SF3B2_P1P2+P1P2_157412+5225	5
AKAP9+SF3B2_P1P2+P1P2_157412+5229	10
AKAP9+SF3B2_P1P2+P1P2_157412+5230	13
AKAP9+SF3B2_P1P2+P1P2_157417+5225	4
AKAP9+SF3B2_P1P2+P1P2_157417+5229	13
AKAP9+SF3B2_P1P2+P1P2_157417+5230	26
AKAP9+SF3B2_P1P2+P1P2_157420+5225	30
AKAP9+SF3B2_P1P2+P1P2_157420+5229	7
AKAP9+SF3B2_P1P2+P1P2_157420+5230	37
AKAP9+SGTA_P1P2+P1P2_158011+5225	129
AKAP9+SGTA_P1P2+P1P2_158011+5229	50
AKAP9+SGTA_P1P2+P1P2_158011+5230	109
AKAP9+SGTA_P1P2+P1P2_158013+5225	136
AKAP9+SGTA_P1P2+P1P2_158013+5229	82
AKAP9+SGTA_P1P2+P1P2_158013+5230	147
AKAP9+SGTA_P1P2+P1P2_158019+5225	80
AKAP9+SGTA_P1P2+P1P2_158019+5229	66
AKAP9+SGTA_P1P2+P1P2_158019+5230	92
AKAP9+SMC3_P1P2+P1P2_164524+5225	6
AKAP9+SMC3_P1P2+P1P2_164524+5229	24
AKAP9+SMC3_P1P2+P1P2_164524+5230	6
AKAP9+SMC3_P1P2+P1P2_164528+5225	13
AKAP9+SMC3_P1P2+P1P2_164528+5229	24
AKAP9+SMC3_P1P2+P1P2_164528+5230	5
AKAP9+SMC3_P1P2+P1P2_164530+5229	1
AKAP9+SNRPD3_P1P2+P1P2_165672+5225	42
AKAP9+SNRPD3_P1P2+P1P2_165672+5229	11
AKAP9+SNRPD3_P1P2+P1P2_165672+5230	22
AKAP9+SNRPD3_P1P2+P1P2_165675+5225	8
AKAP9+SNRPD3_P1P2+P1P2_165675+5230	1
AKAP9+SNRPD3_P1P2+P1P2_165677+5225	9
AKAP9+SNRPD3_P1P2+P1P2_165677+5229	3
AKAP9+SNRPD3_P1P2+P1P2_165677+5230	8
AKAP9+SON_P1+P1P2_166333+5225	8
AKAP9+SON_P1+P1P2_166333+5229	5
AKAP9+SON_P1+P1P2_166333+5230	4
AKAP9+SON_P1+P1P2_166335+5225	3
AKAP9+SON_P1+P1P2_166335+5229	5
AKAP9+SON_P1+P1P2_166335+5230	1
AKAP9+SON_P1+P1P2_166338+5225	23
AKAP9+SON_P1+P1P2_166338+5229	48
AKAP9+SON_P1+P1P2_166338+5230	1
AKAP9+SPATA5L1_P1P2+P1P2_167432+5225	11
AKAP9+SPATA5L1_P1P2+P1P2_167432+5229	2
AKAP9+SPATA5L1_P1P2+P1P2_167432+5230	5
AKAP9+SPATA5L1_P1P2+P1P2_167433+5225	113
AKAP9+SPATA5L1_P1P2+P1P2_167433+5229	20
AKAP9+SPATA5L1_P1P2+P1P2_167433+5230	58
AKAP9+SPATA5L1_P1P2+P1P2_167437+5225	23
AKAP9+SPATA5L1_P1P2+P1P2_167437+5229	7
AKAP9+SPATA5L1_P1P2+P1P2_167437+5230	4
AKAP9+SPCS3_P1+P1P2_167592+5225	59
AKAP9+SPCS3_P1+P1P2_167592+5229	50
AKAP9+SPCS3_P1+P1P2_167592+5230	35
AKAP9+SPCS3_P1+P1P2_167595+5225	902
AKAP9+SPCS3_P1+P1P2_167595+5229	679
AKAP9+SPCS3_P1+P1P2_167595+5230	523
AKAP9+SPCS3_P1+P1P2_167598+5225	294
AKAP9+SPCS3_P1+P1P2_167598+5229	353
AKAP9+SPCS3_P1+P1P2_167598+5230	384
AKAP9+SPPL3_P1P2+P1P2_168364+5225	869
AKAP9+SPPL3_P1P2+P1P2_168364+5229	591
AKAP9+SPPL3_P1P2+P1P2_168364+5230	742
AKAP9+SPPL3_P1P2+P1P2_168365+5225	258
AKAP9+SPPL3_P1P2+P1P2_168365+5229	245
AKAP9+SPPL3_P1P2+P1P2_168365+5230	242
AKAP9+SPPL3_P1P2+P1P2_168368+5225	1000
AKAP9+SPPL3_P1P2+P1P2_168368+5229	427
AKAP9+SPPL3_P1P2+P1P2_168368+5230	555
AKAP9+SRP54_P1P2+P1P2_169152+5225	192
AKAP9+SRP54_P1P2+P1P2_169152+5229	168
AKAP9+SRP54_P1P2+P1P2_169152+5230	216
AKAP9+SRP54_P1P2+P1P2_169154+5225	210
AKAP9+SRP54_P1P2+P1P2_169154+5229	131
AKAP9+SRP54_P1P2+P1P2_169154+5230	68
AKAP9+SRP54_P1P2+P1P2_169157+5225	167
AKAP9+SRP54_P1P2+P1P2_169157+5229	109
AKAP9+SRP54_P1P2+P1P2_169157+5230	69
AKAP9+SRPRB_P1P2+P1P2_169241+5225	26
AKAP9+SRPRB_P1P2+P1P2_169241+5229	17
AKAP9+SRPRB_P1P2+P1P2_169241+5230	23
AKAP9+SRPRB_P1P2+P1P2_169242+5225	9
AKAP9+SRPRB_P1P2+P1P2_169242+5229	13
AKAP9+SRPRB_P1P2+P1P2_169242+5230	2
AKAP9+SRPRB_P1P2+P1P2_169243+5225	74
AKAP9+SRPRB_P1P2+P1P2_169243+5229	49
AKAP9+SRPRB_P1P2+P1P2_169243+5230	69
AKAP9+ST3GAL4_P1P2+P1P2_169993+5225	22
AKAP9+ST3GAL4_P1P2+P1P2_169993+5229	50
AKAP9+ST3GAL4_P1P2+P1P2_169993+5230	51
AKAP9+ST3GAL4_P1P2+P1P2_169997+5225	59
AKAP9+ST3GAL4_P1P2+P1P2_169997+5229	56
AKAP9+ST3GAL4_P1P2+P1P2_169997+5230	52
AKAP9+ST3GAL4_P1P2+P1P2_169998+5225	50
AKAP9+ST3GAL4_P1P2+P1P2_169998+5229	13
AKAP9+ST3GAL4_P1P2+P1P2_169998+5230	17
AKAP9+STX5_P1P2+P1P2_171421+5225	476
AKAP9+STX5_P1P2+P1P2_171421+5229	272
AKAP9+STX5_P1P2+P1P2_171421+5230	168
AKAP9+STX5_P1P2+P1P2_171422+5225	76
AKAP9+STX5_P1P2+P1P2_171422+5229	132
AKAP9+STX5_P1P2+P1P2_171422+5230	63
AKAP9+STX5_P1P2+P1P2_171423+5225	235
AKAP9+STX5_P1P2+P1P2_171423+5229	36
AKAP9+STX5_P1P2+P1P2_171423+5230	91
AKAP9+SUCO_P1P2+P1P2_171621+5225	714
AKAP9+SUCO_P1P2+P1P2_171621+5229	350
AKAP9+SUCO_P1P2+P1P2_171621+5230	592
AKAP9+SUCO_P1P2+P1P2_171622+5225	795
AKAP9+SUCO_P1P2+P1P2_171622+5229	774
AKAP9+SUCO_P1P2+P1P2_171622+5230	679
AKAP9+SUCO_P1P2+P1P2_171625+5225	1071
AKAP9+SUCO_P1P2+P1P2_171625+5229	480
AKAP9+SUCO_P1P2+P1P2_171625+5230	573
AKAP9+THOC5_P1P2+P1P2_177821+5225	29
AKAP9+THOC5_P1P2+P1P2_177821+5229	1
AKAP9+THOC5_P1P2+P1P2_177821+5230	2
AKAP9+THOC5_P1P2+P1P2_177828+5225	162
AKAP9+THOC5_P1P2+P1P2_177828+5229	57
AKAP9+THOC5_P1P2+P1P2_177828+5230	48
AKAP9+THOC5_P1P2+P1P2_177829+5225	16
AKAP9+THOC5_P1P2+P1P2_177829+5229	21
[truncated: 42,271 more rows]

## Sheet: Ricin rep 2
0Safe+0Safe_safe+safe_204603.4554+204603.4554	90
0Safe+0Safe_safe+safe_204603.4554+204750.4701	167
0Safe+0Safe_safe+safe_204603.4554+204798.4749	319
0Safe+0Safe_safe+safe_204603.4554+204895.4846	144
0Safe+0Safe_safe+safe_204603.4554+205190.5141	170
0Safe+0Safe_safe+safe_204603.4554+205244.5195	131
0Safe+0Safe_safe+safe_204603.4554+205896.5847	98
0Safe+0Safe_safe+safe_204603.4554+205926.5877	188
0Safe+0Safe_safe+safe_204603.4554+206014.5965	84
0Safe+0Safe_safe+safe_204603.4554+206141.1592	179
0Safe+0Safe_safe+safe_204603.4554+206175.1626	144
0Safe+0Safe_safe+safe_204603.4554+206180.1631	94
0Safe+0Safe_safe+safe_204603.4554+206276.1727	79
0Safe+0Safe_safe+safe_204603.4554+207086.1286	242
0Safe+0Safe_safe+safe_204603.4554+207133.1333	166
0Safe+0Safe_safe+safe_204603.4554+207268.1468	110
0Safe+0Safe_safe+safe_204603.4554+207272.1472	221
0Safe+0Safe_safe+safe_204603.4554+207295.1495	157
0Safe+0Safe_safe+safe_204603.4554+207412.862	121
0Safe+0Safe_safe+safe_204603.4554+207644.2345	237
0Safe+0Safe_safe+safe_204603.4554+207736.2437	124
0Safe+0Safe_safe+safe_204603.4554+207762.2463	72
0Safe+0Safe_safe+safe_204603.4554+207933.2634	171
0Safe+0Safe_safe+safe_204603.4554+208027.2728	190
0Safe+0Safe_safe+safe_204603.4554+208233.2934	187
0Safe+0Safe_safe+safe_204603.4554+208249.2950	159
0Safe+0Safe_safe+safe_204603.4554+208251.2952	211
0Safe+0Safe_safe+safe_204603.4554+208266.2967	135
0Safe+0Safe_safe+safe_204603.4554+208280.2981	354
0Safe+0Safe_safe+safe_204603.4554+208288.2989	206
0Safe+0Safe_safe+safe_204603.4554+208334.13	71
0Safe+0Safe_safe+safe_204603.4554+208691.451	158
0Safe+0Safe_safe+safe_204603.4554+208974.706	154
0Safe+0Safe_safe+safe_204603.4554+209014.742	131
0Safe+0Safe_safe+safe_204603.4554+209157.3858	103
0Safe+0Safe_safe+safe_204603.4554+209400.4101	170
0Safe+0Safe_safe+safe_204603.4554+209597.4298	203
0Safe+0Safe_safe+safe_204603.4554+209963.3164	215
0Safe+0Safe_safe+safe_204603.4554+209973.3174	331
0Safe+0Safe_safe+safe_204603.4554+209990.3191	169
0Safe+0Safe_safe+safe_204603.4554+210140.3341	200
0Safe+0Safe_safe+safe_204603.4554+210313.3514	177
0Safe+0Safe_safe+safe_204603.4554+210540.3741	218
0Safe+0Safe_safe+safe_204603.4554+210725.6176	174
0Safe+0Safe_safe+safe_204603.4554+210743.6194	191
0Safe+0Safe_safe+safe_204603.4554+210809.6260	188
0Safe+0Safe_safe+safe_204603.4554+210925.6376	142
0Safe+0Safe_safe+safe_204603.4554+210935.6386	144
0Safe+0Safe_safe+safe_204603.4554+210946.6397	110
0Safe+0Safe_safe+safe_204603.4554+211135.6586	243
0Safe+0Safe_safe+safe_204750.4701+204750.4701	64
0Safe+0Safe_safe+safe_204750.4701+204798.4749	204
0Safe+0Safe_safe+safe_204750.4701+204895.4846	85
0Safe+0Safe_safe+safe_204750.4701+205190.5141	188
0Safe+0Safe_safe+safe_204750.4701+205244.5195	142
0Safe+0Safe_safe+safe_204750.4701+205896.5847	116
0Safe+0Safe_safe+safe_204750.4701+205926.5877	93
0Safe+0Safe_safe+safe_204750.4701+206014.5965	197
0Safe+0Safe_safe+safe_204750.4701+206141.1592	116
0Safe+0Safe_safe+safe_204750.4701+206175.1626	212
0Safe+0Safe_safe+safe_204750.4701+206180.1631	203
0Safe+0Safe_safe+safe_204750.4701+206276.1727	195
0Safe+0Safe_safe+safe_204750.4701+207086.1286	137
0Safe+0Safe_safe+safe_204750.4701+207133.1333	156
0Safe+0Safe_safe+safe_204750.4701+207268.1468	153
0Safe+0Safe_safe+safe_204750.4701+207272.1472	107
0Safe+0Safe_safe+safe_204750.4701+207295.1495	198
0Safe+0Safe_safe+safe_204750.4701+207412.862	183
0Safe+0Safe_safe+safe_204750.4701+207644.2345	186
0Safe+0Safe_safe+safe_204750.4701+207736.2437	116
0Safe+0Safe_safe+safe_204750.4701+207762.2463	199
0Safe+0Safe_safe+safe_204750.4701+207933.2634	138
0Safe+0Safe_safe+safe_204750.4701+208027.2728	111
0Safe+0Safe_safe+safe_204750.4701+208233.2934	128
0Safe+0Safe_safe+safe_204750.4701+208249.2950	122
0Safe+0Safe_safe+safe_204750.4701+208251.2952	179
0Safe+0Safe_safe+safe_204750.4701+208266.2967	231
0Safe+0Safe_safe+safe_204750.4701+208280.2981	216
0Safe+0Safe_safe+safe_204750.4701+208288.2989	183
0Safe+0Safe_safe+safe_204750.4701+208334.13	174
0Safe+0Safe_safe+safe_204750.4701+208691.451	177
0Safe+0Safe_safe+safe_204750.4701+208974.706	123
0Safe+0Safe_safe+safe_204750.4701+209014.742	145
0Safe+0Safe_safe+safe_204750.4701+209157.3858	373
0Safe+0Safe_safe+safe_204750.4701+209400.4101	140
0Safe+0Safe_safe+safe_204750.4701+209597.4298	75
0Safe+0Safe_safe+safe_204750.4701+209963.3164	98
0Safe+0Safe_safe+safe_204750.4701+209973.3174	345
0Safe+0Safe_safe+safe_204750.4701+209990.3191	289
0Safe+0Safe_safe+safe_204750.4701+210140.3341	159
0Safe+0Safe_safe+safe_204750.4701+210313.3514	296
0Safe+0Safe_safe+safe_204750.4701+210540.3741	233
0Safe+0Safe_safe+safe_204750.4701+210725.6176	174
0Safe+0Safe_safe+safe_204750.4701+210743.6194	146
0Safe+0Safe_safe+safe_204750.4701+210809.6260	86
0Safe+0Safe_safe+safe_204750.4701+210925.6376	166
0Safe+0Safe_safe+safe_204750.4701+210935.6386	162
0Safe+0Safe_safe+safe_204750.4701+210946.6397	184
0Safe+0Safe_safe+safe_204750.4701+211135.6586	126
0Safe+0Safe_safe+safe_204798.4749+204798.4749	62
0Safe+0Safe_safe+safe_204798.4749+204895.4846	232
0Safe+0Safe_safe+safe_204798.4749+205190.5141	131
0Safe+0Safe_safe+safe_204798.4749+205244.5195	246
0Safe+0Safe_safe+safe_204798.4749+205896.5847	199
0Safe+0Safe_safe+safe_204798.4749+205926.5877	176
0Safe+0Safe_safe+safe_204798.4749+206014.5965	127
0Safe+0Safe_safe+safe_204798.4749+206141.1592	197
0Safe+0Safe_safe+safe_204798.4749+206175.1626	144
0Safe+0Safe_safe+safe_204798.4749+206180.1631	225
0Safe+0Safe_safe+safe_204798.4749+206276.1727	148
0Safe+0Safe_safe+safe_204798.4749+207086.1286	189
0Safe+0Safe_safe+safe_204798.4749+207133.1333	207
0Safe+0Safe_safe+safe_204798.4749+207268.1468	52
0Safe+0Safe_safe+safe_204798.4749+207272.1472	138
0Safe+0Safe_safe+safe_204798.4749+207295.1495	162
0Safe+0Safe_safe+safe_204798.4749+207412.862	148
0Safe+0Safe_safe+safe_204798.4749+207644.2345	339
0Safe+0Safe_safe+safe_204798.4749+207736.2437	437
0Safe+0Safe_safe+safe_204798.4749+207762.2463	227
0Safe+0Safe_safe+safe_204798.4749+207933.2634	126
0Safe+0Safe_safe+safe_204798.4749+208027.2728	239
0Safe+0Safe_safe+safe_204798.4749+208233.2934	150
0Safe+0Safe_safe+safe_204798.4749+208249.2950	149
0Safe+0Safe_safe+safe_204798.4749+208251.2952	206
0Safe+0Safe_safe+safe_204798.4749+208266.2967	171
0Safe+0Safe_safe+safe_204798.4749+208280.2981	183
0Safe+0Safe_safe+safe_204798.4749+208288.2989	248
0Safe+0Safe_safe+safe_204798.4749+208334.13	127
0Safe+0Safe_safe+safe_204798.4749+208691.451	256
0Safe+0Safe_safe+safe_204798.4749+208974.706	172
0Safe+0Safe_safe+safe_204798.4749+209014.742	89
0Safe+0Safe_safe+safe_204798.4749+209157.3858	304
0Safe+0Safe_safe+safe_204798.4749+209400.4101	162
0Safe+0Safe_safe+safe_204798.4749+209597.4298	147
0Safe+0Safe_safe+safe_204798.4749+209963.3164	183
0Safe+0Safe_safe+safe_204798.4749+209973.3174	232
0Safe+0Safe_safe+safe_204798.4749+209990.3191	157
0Safe+0Safe_safe+safe_204798.4749+210140.3341	264
0Safe+0Safe_safe+safe_204798.4749+210313.3514	138
0Safe+0Safe_safe+safe_204798.4749+210540.3741	206
0Safe+0Safe_safe+safe_204798.4749+210725.6176	170
0Safe+0Safe_safe+safe_204798.4749+210743.6194	118
0Safe+0Safe_safe+safe_204798.4749+210809.6260	177
0Safe+0Safe_safe+safe_204798.4749+210925.6376	222
0Safe+0Safe_safe+safe_204798.4749+210935.6386	112
0Safe+0Safe_safe+safe_204798.4749+210946.6397	177
0Safe+0Safe_safe+safe_204798.4749+211135.6586	86
0Safe+0Safe_safe+safe_204895.4846+204895.4846	95
0Safe+0Safe_safe+safe_204895.4846+205190.5141	180
0Safe+0Safe_safe+safe_204895.4846+205244.5195	128
0Safe+0Safe_safe+safe_204895.4846+205896.5847	174
0Safe+0Safe_safe+safe_204895.4846+205926.5877	176
0Safe+0Safe_safe+safe_204895.4846+206014.5965	89
0Safe+0Safe_safe+safe_204895.4846+206141.1592	190
0Safe+0Safe_safe+safe_204895.4846+206175.1626	98
0Safe+0Safe_safe+safe_204895.4846+206180.1631	98
0Safe+0Safe_safe+safe_204895.4846+206276.1727	96
0Safe+0Safe_safe+safe_204895.4846+207086.1286	237
0Safe+0Safe_safe+safe_204895.4846+207133.1333	179
0Safe+0Safe_safe+safe_204895.4846+207268.1468	92
0Safe+0Safe_safe+safe_204895.4846+207272.1472	219
0Safe+0Safe_safe+safe_204895.4846+207295.1495	93
0Safe+0Safe_safe+safe_204895.4846+207412.862	62
0Safe+0Safe_safe+safe_204895.4846+207644.2345	159
0Safe+0Safe_safe+safe_204895.4846+207736.2437	264
0Safe+0Safe_safe+safe_204895.4846+207762.2463	259
0Safe+0Safe_safe+safe_204895.4846+207933.2634	104
0Safe+0Safe_safe+safe_204895.4846+208027.2728	136
0Safe+0Safe_safe+safe_204895.4846+208233.2934	125
0Safe+0Safe_safe+safe_204895.4846+208249.2950	170
0Safe+0Safe_safe+safe_204895.4846+208251.2952	208
0Safe+0Safe_safe+safe_204895.4846+208266.2967	148
0Safe+0Safe_safe+safe_204895.4846+208280.2981	146
0Safe+0Safe_safe+safe_204895.4846+208288.2989	133
0Safe+0Safe_safe+safe_204895.4846+208334.13	183
0Safe+0Safe_safe+safe_204895.4846+208691.451	189
0Safe+0Safe_safe+safe_204895.4846+208974.706	172
0Safe+0Safe_safe+safe_204895.4846+209014.742	55
0Safe+0Safe_safe+safe_204895.4846+209157.3858	233
0Safe+0Safe_safe+safe_204895.4846+209400.4101	119
0Safe+0Safe_safe+safe_204895.4846+209597.4298	171
0Safe+0Safe_safe+safe_204895.4846+209963.3164	112
0Safe+0Safe_safe+safe_204895.4846+209973.3174	266
0Safe+0Safe_safe+safe_204895.4846+209990.3191	174
0Safe+0Safe_safe+safe_204895.4846+210140.3341	188
0Safe+0Safe_safe+safe_204895.4846+210313.3514	124
0Safe+0Safe_safe+safe_204895.4846+210540.3741	107
0Safe+0Safe_safe+safe_204895.4846+210725.6176	166
0Safe+0Safe_safe+safe_204895.4846+210743.6194	113
0Safe+0Safe_safe+safe_204895.4846+210809.6260	47
0Safe+0Safe_safe+safe_204895.4846+210925.6376	302
0Safe+0Safe_safe+safe_204895.4846+210935.6386	133
0Safe+0Safe_safe+safe_204895.4846+210946.6397	162
0Safe+0Safe_safe+safe_204895.4846+211135.6586	79
0Safe+0Safe_safe+safe_205190.5141+205190.5141	42
0Safe+0Safe_safe+safe_205190.5141+205244.5195	95
0Safe+0Safe_safe+safe_205190.5141+205896.5847	159
0Safe+0Safe_safe+safe_205190.5141+205926.5877	129
0Safe+0Safe_safe+safe_205190.5141+206014.5965	174
0Safe+0Safe_safe+safe_205190.5141+206141.1592	102
0Safe+0Safe_safe+safe_205190.5141+206175.1626	115
0Safe+0Safe_safe+safe_205190.5141+206180.1631	279
0Safe+0Safe_safe+safe_205190.5141+206276.1727	109
0Safe+0Safe_safe+safe_205190.5141+207086.1286	174
0Safe+0Safe_safe+safe_205190.5141+207133.1333	225
0Safe+0Safe_safe+safe_205190.5141+207268.1468	116
0Safe+0Safe_safe+safe_205190.5141+207272.1472	86
0Safe+0Safe_safe+safe_205190.5141+207295.1495	157
0Safe+0Safe_safe+safe_205190.5141+207412.862	161
0Safe+0Safe_safe+safe_205190.5141+207644.2345	171
0Safe+0Safe_safe+safe_205190.5141+207736.2437	241
0Safe+0Safe_safe+safe_205190.5141+207762.2463	147
0Safe+0Safe_safe+safe_205190.5141+207933.2634	99
0Safe+0Safe_safe+safe_205190.5141+208027.2728	113
0Safe+0Safe_safe+safe_205190.5141+208233.2934	169
0Safe+0Safe_safe+safe_205190.5141+208249.2950	117
0Safe+0Safe_safe+safe_205190.5141+208251.2952	149
0Safe+0Safe_safe+safe_205190.5141+208266.2967	180
0Safe+0Safe_safe+safe_205190.5141+208280.2981	115
0Safe+0Safe_safe+safe_205190.5141+208288.2989	138
0Safe+0Safe_safe+safe_205190.5141+208334.13	119
0Safe+0Safe_safe+safe_205190.5141+208691.451	140
0Safe+0Safe_safe+safe_205190.5141+208974.706	153
0Safe+0Safe_safe+safe_205190.5141+209014.742	233
0Safe+0Safe_safe+safe_205190.5141+209157.3858	213
0Safe+0Safe_safe+safe_205190.5141+209400.4101	165
0Safe+0Safe_safe+safe_205190.5141+209597.4298	183
0Safe+0Safe_safe+safe_205190.5141+209963.3164	177
0Safe+0Safe_safe+safe_205190.5141+209973.3174	135
0Safe+0Safe_safe+safe_205190.5141+209990.3191	143
0Safe+0Safe_safe+safe_205190.5141+210140.3341	210
0Safe+0Safe_safe+safe_205190.5141+210313.3514	106
0Safe+0Safe_safe+safe_205190.5141+210540.3741	230
0Safe+0Safe_safe+safe_205190.5141+210725.6176	87
0Safe+0Safe_safe+safe_205190.5141+210743.6194	213
0Safe+0Safe_safe+safe_205190.5141+210809.6260	98
0Safe+0Safe_safe+safe_205190.5141+210925.6376	178
0Safe+0Safe_safe+safe_205190.5141+210935.6386	169
0Safe+0Safe_safe+safe_205190.5141+210946.6397	204
0Safe+0Safe_safe+safe_205190.5141+211135.6586	135
0Safe+0Safe_safe+safe_205244.5195+205244.5195	77
0Safe+0Safe_safe+safe_205244.5195+205896.5847	129
0Safe+0Safe_safe+safe_205244.5195+205926.5877	223
0Safe+0Safe_safe+safe_205244.5195+206014.5965	229
0Safe+0Safe_safe+safe_205244.5195+206141.1592	165
0Safe+0Safe_safe+safe_205244.5195+206175.1626	157
0Safe+0Safe_safe+safe_205244.5195+206180.1631	139
0Safe+0Safe_safe+safe_205244.5195+206276.1727	115
0Safe+0Safe_safe+safe_205244.5195+207086.1286	247
0Safe+0Safe_safe+safe_205244.5195+207133.1333	288
0Safe+0Safe_safe+safe_205244.5195+207268.1468	150
0Safe+0Safe_safe+safe_205244.5195+207272.1472	151
0Safe+0Safe_safe+safe_205244.5195+207295.1495	254
0Safe+0Safe_safe+safe_205244.5195+207412.862	167
0Safe+0Safe_safe+safe_205244.5195+207644.2345	236
0Safe+0Safe_safe+safe_205244.5195+207736.2437	234
0Safe+0Safe_safe+safe_205244.5195+207762.2463	131
0Safe+0Safe_safe+safe_205244.5195+207933.2634	133
0Safe+0Safe_safe+safe_205244.5195+208027.2728	178
0Safe+0Safe_safe+safe_205244.5195+208233.2934	112
0Safe+0Safe_safe+safe_205244.5195+208249.2950	116
0Safe+0Safe_safe+safe_205244.5195+208251.2952	155
0Safe+0Safe_safe+safe_205244.5195+208266.2967	161
0Safe+0Safe_safe+safe_205244.5195+208280.2981	270
0Safe+0Safe_safe+safe_205244.5195+208288.2989	115
0Safe+0Safe_safe+safe_205244.5195+208334.13	138
0Safe+0Safe_safe+safe_205244.5195+208691.451	231
0Safe+0Safe_safe+safe_205244.5195+208974.706	154
0Safe+0Safe_safe+safe_205244.5195+209014.742	94
0Safe+0Safe_safe+safe_205244.5195+209157.3858	177
0Safe+0Safe_safe+safe_205244.5195+209400.4101	178
0Safe+0Safe_safe+safe_205244.5195+209597.4298	214
0Safe+0Safe_safe+safe_205244.5195+209963.3164	208
0Safe+0Safe_safe+safe_205244.5195+209973.3174	270
0Safe+0Safe_safe+safe_205244.5195+209990.3191	79
0Safe+0Safe_safe+safe_205244.5195+210140.3341	178
0Safe+0Safe_safe+safe_205244.5195+210313.3514	350
0Safe+0Safe_safe+safe_205244.5195+210540.3741	211
0Safe+0Safe_safe+safe_205244.5195+210725.6176	141
0Safe+0Safe_safe+safe_205244.5195+210743.6194	171
0Safe+0Safe_safe+safe_205244.5195+210809.6260	204
0Safe+0Safe_safe+safe_205244.5195+210925.6376	300
0Safe+0Safe_safe+safe_205244.5195+210935.6386	70
0Safe+0Safe_safe+safe_205244.5195+210946.6397	112
0Safe+0Safe_safe+safe_205244.5195+211135.6586	133
0Safe+0Safe_safe+safe_205896.5847+205896.5847	45
0Safe+0Safe_safe+safe_205896.5847+205926.5877	121
0Safe+0Safe_safe+safe_205896.5847+206014.5965	114
0Safe+0Safe_safe+safe_205896.5847+206141.1592	233
0Safe+0Safe_safe+safe_205896.5847+206175.1626	223
0Safe+0Safe_safe+safe_205896.5847+206180.1631	260
0Safe+0Safe_safe+safe_205896.5847+206276.1727	127
0Safe+0Safe_safe+safe_205896.5847+207086.1286	147
0Safe+0Safe_safe+safe_205896.5847+207133.1333	175
0Safe+0Safe_safe+safe_205896.5847+207268.1468	157
0Safe+0Safe_safe+safe_205896.5847+207272.1472	150
0Safe+0Safe_safe+safe_205896.5847+207295.1495	84
0Safe+0Safe_safe+safe_205896.5847+207412.862	142
0Safe+0Safe_safe+safe_205896.5847+207644.2345	141
0Safe+0Safe_safe+safe_205896.5847+207736.2437	116
0Safe+0Safe_safe+safe_205896.5847+207762.2463	162
0Safe+0Safe_safe+safe_205896.5847+207933.2634	96
0Safe+0Safe_safe+safe_205896.5847+208027.2728	91
0Safe+0Safe_safe+safe_205896.5847+208233.2934	166
0Safe+0Safe_safe+safe_205896.5847+208249.2950	276
0Safe+0Safe_safe+safe_205896.5847+208251.2952	324
0Safe+0Safe_safe+safe_205896.5847+208266.2967	130
0Safe+0Safe_safe+safe_205896.5847+208280.2981	207
0Safe+0Safe_safe+safe_205896.5847+208288.2989	326
0Safe+0Safe_safe+safe_205896.5847+208334.13	130
0Safe+0Safe_safe+safe_205896.5847+208691.451	173
0Safe+0Safe_safe+safe_205896.5847+208974.706	206
0Safe+0Safe_safe+safe_205896.5847+209014.742	323
0Safe+0Safe_safe+safe_205896.5847+209157.3858	190
0Safe+0Safe_safe+safe_205896.5847+209400.4101	242
0Safe+0Safe_safe+safe_205896.5847+209597.4298	155
0Safe+0Safe_safe+safe_205896.5847+209963.3164	139
0Safe+0Safe_safe+safe_205896.5847+209973.3174	217
0Safe+0Safe_safe+safe_205896.5847+209990.3191	133
0Safe+0Safe_safe+safe_205896.5847+210140.3341	198
0Safe+0Safe_safe+safe_205896.5847+210313.3514	215
0Safe+0Safe_safe+safe_205896.5847+210540.3741	100
0Safe+0Safe_safe+safe_205896.5847+210725.6176	102
0Safe+0Safe_safe+safe_205896.5847+210743.6194	90
0Safe+0Safe_safe+safe_205896.5847+210809.6260	233
0Safe+0Safe_safe+safe_205896.5847+210925.6376	82
0Safe+0Safe_safe+safe_205896.5847+210935.6386	225
0Safe+0Safe_safe+safe_205896.5847+210946.6397	66
0Safe+0Safe_safe+safe_205896.5847+211135.6586	142
0Safe+0Safe_safe+safe_205926.5877+205926.5877	23
0Safe+0Safe_safe+safe_205926.5877+206014.5965	153
0Safe+0Safe_safe+safe_205926.5877+206141.1592	267
0Safe+0Safe_safe+safe_205926.5877+206175.1626	124
0Safe+0Safe_safe+safe_205926.5877+206180.1631	129
0Safe+0Safe_safe+safe_205926.5877+206276.1727	88
0Safe+0Safe_safe+safe_205926.5877+207086.1286	131
0Safe+0Safe_safe+safe_205926.5877+207133.1333	274
0Safe+0Safe_safe+safe_205926.5877+207268.1468	115
0Safe+0Safe_safe+safe_205926.5877+207272.1472	262
0Safe+0Safe_safe+safe_205926.5877+207295.1495	200
0Safe+0Safe_safe+safe_205926.5877+207412.862	238
0Safe+0Safe_safe+safe_205926.5877+207644.2345	235
0Safe+0Safe_safe+safe_205926.5877+207736.2437	199
0Safe+0Safe_safe+safe_205926.5877+207762.2463	142
0Safe+0Safe_safe+safe_205926.5877+207933.2634	106
0Safe+0Safe_safe+safe_205926.5877+208027.2728	150
0Safe+0Safe_safe+safe_205926.5877+208233.2934	104
0Safe+0Safe_safe+safe_205926.5877+208249.2950	186
0Safe+0Safe_safe+safe_205926.5877+208251.2952	165
0Safe+0Safe_safe+safe_205926.5877+208266.2967	203
0Safe+0Safe_safe+safe_205926.5877+208280.2981	143
0Safe+0Safe_safe+safe_205926.5877+208288.2989	227
0Safe+0Safe_safe+safe_205926.5877+208334.13	174
0Safe+0Safe_safe+safe_205926.5877+208691.451	213
0Safe+0Safe_safe+safe_205926.5877+208974.706	399
0Safe+0Safe_safe+safe_205926.5877+209014.742	301
0Safe+0Safe_safe+safe_205926.5877+209157.3858	177
0Safe+0Safe_safe+safe_205926.5877+209400.4101	171
0Safe+0Safe_safe+safe_205926.5877+209597.4298	214
0Safe+0Safe_safe+safe_205926.5877+209963.3164	141
0Safe+0Safe_safe+safe_205926.5877+209973.3174	258
0Safe+0Safe_safe+safe_205926.5877+209990.3191	164
0Safe+0Safe_safe+safe_205926.5877+210140.3341	331
0Safe+0Safe_safe+safe_205926.5877+210313.3514	192
0Safe+0Safe_safe+safe_205926.5877+210540.3741	199
0Safe+0Safe_safe+safe_205926.5877+210725.6176	250
0Safe+0Safe_safe+safe_205926.5877+210743.6194	305
0Safe+0Safe_safe+safe_205926.5877+210809.6260	61
0Safe+0Safe_safe+safe_205926.5877+210925.6376	126
0Safe+0Safe_safe+safe_205926.5877+210935.6386	171
0Safe+0Safe_safe+safe_205926.5877+210946.6397	54
0Safe+0Safe_safe+safe_205926.5877+211135.6586	128
0Safe+0Safe_safe+safe_206014.5965+206014.5965	129
0Safe+0Safe_safe+safe_206014.5965+206141.1592	151
0Safe+0Safe_safe+safe_206014.5965+206175.1626	249
0Safe+0Safe_safe+safe_206014.5965+206180.1631	158
0Safe+0Safe_safe+safe_206014.5965+206276.1727	141
0Safe+0Safe_safe+safe_206014.5965+207086.1286	180
0Safe+0Safe_safe+safe_206014.5965+207133.1333	181
0Safe+0Safe_safe+safe_206014.5965+207268.1468	95
0Safe+0Safe_safe+safe_206014.5965+207272.1472	261
0Safe+0Safe_safe+safe_206014.5965+207295.1495	273
0Safe+0Safe_safe+safe_206014.5965+207412.862	214
0Safe+0Safe_safe+safe_206014.5965+207644.2345	152
0Safe+0Safe_safe+safe_206014.5965+207736.2437	113
0Safe+0Safe_safe+safe_206014.5965+207762.2463	61
0Safe+0Safe_safe+safe_206014.5965+207933.2634	182
0Safe+0Safe_safe+safe_206014.5965+208027.2728	206
0Safe+0Safe_safe+safe_206014.5965+208233.2934	202
0Safe+0Safe_safe+safe_206014.5965+208249.2950	315
0Safe+0Safe_safe+safe_206014.5965+208251.2952	122
0Safe+0Safe_safe+safe_206014.5965+208266.2967	193
0Safe+0Safe_safe+safe_206014.5965+208280.2981	185
0Safe+0Safe_safe+safe_206014.5965+208288.2989	174
0Safe+0Safe_safe+safe_206014.5965+208334.13	253
0Safe+0Safe_safe+safe_206014.5965+208691.451	212
0Safe+0Safe_safe+safe_206014.5965+208974.706	197
0Safe+0Safe_safe+safe_206014.5965+209014.742	186
0Safe+0Safe_safe+safe_206014.5965+209157.3858	250
0Safe+0Safe_safe+safe_206014.5965+209400.4101	319
0Safe+0Safe_safe+safe_206014.5965+209597.4298	134
0Safe+0Safe_safe+safe_206014.5965+209963.3164	134
0Safe+0Safe_safe+safe_206014.5965+209973.3174	277
0Safe+0Safe_safe+safe_206014.5965+209990.3191	224
0Safe+0Safe_safe+safe_206014.5965+210140.3341	246
0Safe+0Safe_safe+safe_206014.5965+210313.3514	86
0Safe+0Safe_safe+safe_206014.5965+210540.3741	196
0Safe+0Safe_safe+safe_206014.5965+210725.6176	101
0Safe+0Safe_safe+safe_206014.5965+210743.6194	162
0Safe+0Safe_safe+safe_206014.5965+210809.6260	256
0Safe+0Safe_safe+safe_206014.5965+210925.6376	102
0Safe+0Safe_safe+safe_206014.5965+210935.6386	223
0Safe+0Safe_safe+safe_206014.5965+210946.6397	181
0Safe+0Safe_safe+safe_206014.5965+211135.6586	110
0Safe+0Safe_safe+safe_206141.1592+206141.1592	66
0Safe+0Safe_safe+safe_206141.1592+206175.1626	172
0Safe+0Safe_safe+safe_206141.1592+206180.1631	108
0Safe+0Safe_safe+safe_206141.1592+206276.1727	152
0Safe+0Safe_safe+safe_206141.1592+207086.1286	282
0Safe+0Safe_safe+safe_206141.1592+207133.1333	322
0Safe+0Safe_safe+safe_206141.1592+207268.1468	100
0Safe+0Safe_safe+safe_206141.1592+207272.1472	127
0Safe+0Safe_safe+safe_206141.1592+207295.1495	134
0Safe+0Safe_safe+safe_206141.1592+207412.862	163
0Safe+0Safe_safe+safe_206141.1592+207644.2345	351
0Safe+0Safe_safe+safe_206141.1592+207736.2437	250
0Safe+0Safe_safe+safe_206141.1592+207762.2463	134
0Safe+0Safe_safe+safe_206141.1592+207933.2634	191
0Safe+0Safe_safe+safe_206141.1592+208027.2728	122
0Safe+0Safe_safe+safe_206141.1592+208233.2934	216
0Safe+0Safe_safe+safe_206141.1592+208249.2950	263
0Safe+0Safe_safe+safe_206141.1592+208251.2952	164
0Safe+0Safe_safe+safe_206141.1592+208266.2967	156
0Safe+0Safe_safe+safe_206141.1592+208280.2981	219
0Safe+0Safe_safe+safe_206141.1592+208288.2989	254
0Safe+0Safe_safe+safe_206141.1592+208334.13	251
0Safe+0Safe_safe+safe_206141.1592+208691.451	154
0Safe+0Safe_safe+safe_206141.1592+208974.706	186
0Safe+0Safe_safe+safe_206141.1592+209014.742	275
0Safe+0Safe_safe+safe_206141.1592+209157.3858	287
0Safe+0Safe_safe+safe_206141.1592+209400.4101	133
0Safe+0Safe_safe+safe_206141.1592+209597.4298	186
0Safe+0Safe_safe+safe_206141.1592+209963.3164	114
0Safe+0Safe_safe+safe_206141.1592+209973.3174	228
0Safe+0Safe_safe+safe_206141.1592+209990.3191	171
0Safe+0Safe_safe+safe_206141.1592+210140.3341	416
0Safe+0Safe_safe+safe_206141.1592+210313.3514	177
0Safe+0Safe_safe+safe_206141.1592+210540.3741	200
0Safe+0Safe_safe+safe_206141.1592+210725.6176	243
0Safe+0Safe_safe+safe_206141.1592+210743.6194	104
0Safe+0Safe_safe+safe_206141.1592+210809.6260	168
0Safe+0Safe_safe+safe_206141.1592+210925.6376	94
0Safe+0Safe_safe+safe_206141.1592+210935.6386	136
0Safe+0Safe_safe+safe_206141.1592+210946.6397	189
0Safe+0Safe_safe+safe_206141.1592+211135.6586	222
0Safe+0Safe_safe+safe_206175.1626+206175.1626	76
0Safe+0Safe_safe+safe_206175.1626+206180.1631	207
0Safe+0Safe_safe+safe_206175.1626+206276.1727	136
0Safe+0Safe_safe+safe_206175.1626+207086.1286	124
0Safe+0Safe_safe+safe_206175.1626+207133.1333	208
0Safe+0Safe_safe+safe_206175.1626+207268.1468	46
0Safe+0Safe_safe+safe_206175.1626+207272.1472	122
0Safe+0Safe_safe+safe_206175.1626+207295.1495	132
0Safe+0Safe_safe+safe_206175.1626+207412.862	190
0Safe+0Safe_safe+safe_206175.1626+207644.2345	133
0Safe+0Safe_safe+safe_206175.1626+207736.2437	152
0Safe+0Safe_safe+safe_206175.1626+207762.2463	295
0Safe+0Safe_safe+safe_206175.1626+207933.2634	136
0Safe+0Safe_safe+safe_206175.1626+208027.2728	129
0Safe+0Safe_safe+safe_206175.1626+208233.2934	254
0Safe+0Safe_safe+safe_206175.1626+208249.2950	201
0Safe+0Safe_safe+safe_206175.1626+208251.2952	212
0Safe+0Safe_safe+safe_206175.1626+208266.2967	173
0Safe+0Safe_safe+safe_206175.1626+208280.2981	186
0Safe+0Safe_safe+safe_206175.1626+208288.2989	131
0Safe+0Safe_safe+safe_206175.1626+208334.13	122
0Safe+0Safe_safe+safe_206175.1626+208691.451	165
0Safe+0Safe_safe+safe_206175.1626+208974.706	469
0Safe+0Safe_safe+safe_206175.1626+209014.742	196
0Safe+0Safe_safe+safe_206175.1626+209157.3858	145
0Safe+0Safe_safe+safe_206175.1626+209400.4101	218
0Safe+0Safe_safe+safe_206175.1626+209597.4298	136
0Safe+0Safe_safe+safe_206175.1626+209963.3164	151
0Safe+0Safe_safe+safe_206175.1626+209973.3174	159
0Safe+0Safe_safe+safe_206175.1626+209990.3191	215
0Safe+0Safe_safe+safe_206175.1626+210140.3341	303
0Safe+0Safe_safe+safe_206175.1626+210313.3514	181
0Safe+0Safe_safe+safe_206175.1626+210540.3741	235
0Safe+0Safe_safe+safe_206175.1626+210725.6176	132
0Safe+0Safe_safe+safe_206175.1626+210743.6194	145
0Safe+0Safe_safe+safe_206175.1626+210809.6260	99
0Safe+0Safe_safe+safe_206175.1626+210925.6376	100
0Safe+0Safe_safe+safe_206175.1626+210935.6386	126
0Safe+0Safe_safe+safe_206175.1626+210946.6397	144
0Safe+0Safe_safe+safe_206175.1626+211135.6586	274
0Safe+0Safe_safe+safe_206180.1631+206180.1631	84
0Safe+0Safe_safe+safe_206180.1631+206276.1727	121
0Safe+0Safe_safe+safe_206180.1631+207086.1286	236
0Safe+0Safe_safe+safe_206180.1631+207133.1333	143
0Safe+0Safe_safe+safe_206180.1631+207268.1468	102
0Safe+0Safe_safe+safe_206180.1631+207272.1472	194
0Safe+0Safe_safe+safe_206180.1631+207295.1495	195
0Safe+0Safe_safe+safe_206180.1631+207412.862	139
0Safe+0Safe_safe+safe_206180.1631+207644.2345	138
0Safe+0Safe_safe+safe_206180.1631+207736.2437	125
0Safe+0Safe_safe+safe_206180.1631+207762.2463	171
0Safe+0Safe_safe+safe_206180.1631+207933.2634	178
0Safe+0Safe_safe+safe_206180.1631+208027.2728	147
0Safe+0Safe_safe+safe_206180.1631+208233.2934	161
0Safe+0Safe_safe+safe_206180.1631+208249.2950	116
0Safe+0Safe_safe+safe_206180.1631+208251.2952	205
0Safe+0Safe_safe+safe_206180.1631+208266.2967	136
0Safe+0Safe_safe+safe_206180.1631+208280.2981	179
0Safe+0Safe_safe+safe_206180.1631+208288.2989	88
0Safe+0Safe_safe+safe_206180.1631+208334.13	194
0Safe+0Safe_safe+safe_206180.1631+208691.451	177
0Safe+0Safe_safe+safe_206180.1631+208974.706	153
0Safe+0Safe_safe+safe_206180.1631+209014.742	205
0Safe+0Safe_safe+safe_206180.1631+209157.3858	238
0Safe+0Safe_safe+safe_206180.1631+209400.4101	186
0Safe+0Safe_safe+safe_206180.1631+209597.4298	163
0Safe+0Safe_safe+safe_206180.1631+209963.3164	169
0Safe+0Safe_safe+safe_206180.1631+209973.3174	192
0Safe+0Safe_safe+safe_206180.1631+209990.3191	172
0Safe+0Safe_safe+safe_206180.1631+210140.3341	142
0Safe+0Safe_safe+safe_206180.1631+210313.3514	82
0Safe+0Safe_safe+safe_206180.1631+210540.3741	299
0Safe+0Safe_safe+safe_206180.1631+210725.6176	206
0Safe+0Safe_safe+safe_206180.1631+210743.6194	216
0Safe+0Safe_safe+safe_206180.1631+210809.6260	179
0Safe+0Safe_safe+safe_206180.1631+210925.6376	78
0Safe+0Safe_safe+safe_206180.1631+210935.6386	140
0Safe+0Safe_safe+safe_206180.1631+210946.6397	151
0Safe+0Safe_safe+safe_206180.1631+211135.6586	127
0Safe+0Safe_safe+safe_206276.1727+206276.1727	20
0Safe+0Safe_safe+safe_206276.1727+207086.1286	194
0Safe+0Safe_safe+safe_206276.1727+207133.1333	132
0Safe+0Safe_safe+safe_206276.1727+207268.1468	105
0Safe+0Safe_safe+safe_206276.1727+207272.1472	193
0Safe+0Safe_safe+safe_206276.1727+207295.1495	177
0Safe+0Safe_safe+safe_206276.1727+207412.862	136
0Safe+0Safe_safe+safe_206276.1727+207644.2345	289
0Safe+0Safe_safe+safe_206276.1727+207736.2437	225
0Safe+0Safe_safe+safe_206276.1727+207762.2463	186
0Safe+0Safe_safe+safe_206276.1727+207933.2634	169
0Safe+0Safe_safe+safe_206276.1727+208027.2728	45
0Safe+0Safe_safe+safe_206276.1727+208233.2934	131
0Safe+0Safe_safe+safe_206276.1727+208249.2950	251
0Safe+0Safe_safe+safe_206276.1727+208251.2952	145
0Safe+0Safe_safe+safe_206276.1727+208266.2967	198
0Safe+0Safe_safe+safe_206276.1727+208280.2981	261
0Safe+0Safe_safe+safe_206276.1727+208288.2989	188
0Safe+0Safe_safe+safe_206276.1727+208334.13	82
0Safe+0Safe_safe+safe_206276.1727+208691.451	163
0Safe+0Safe_safe+safe_206276.1727+208974.706	233
0Safe+0Safe_safe+safe_206276.1727+209014.742	180
0Safe+0Safe_safe+safe_206276.1727+209157.3858	193
0Safe+0Safe_safe+safe_206276.1727+209400.4101	133
0Safe+0Safe_safe+safe_206276.1727+209597.4298	194
0Safe+0Safe_safe+safe_206276.1727+209963.3164	101
0Safe+0Safe_safe+safe_206276.1727+209973.3174	369
0Safe+0Safe_safe+safe_206276.1727+209990.3191	76
0Safe+0Safe_safe+safe_206276.1727+210140.3341	108
0Safe+0Safe_safe+safe_206276.1727+210313.3514	147
0Safe+0Safe_safe+safe_206276.1727+210540.3741	145
0Safe+0Safe_safe+safe_206276.1727+210725.6176	115
0Safe+0Safe_safe+safe_206276.1727+210743.6194	115
0Safe+0Safe_safe+safe_206276.1727+210809.6260	144
0Safe+0Safe_safe+safe_206276.1727+210925.6376	184
0Safe+0Safe_safe+safe_206276.1727+210935.6386	128
0Safe+0Safe_safe+safe_206276.1727+210946.6397	126
0Safe+0Safe_safe+safe_206276.1727+211135.6586	181
0Safe+0Safe_safe+safe_207086.1286+207086.1286	31
0Safe+0Safe_safe+safe_207086.1286+207133.1333	327
0Safe+0Safe_safe+safe_207086.1286+207268.1468	71
0Safe+0Safe_safe+safe_207086.1286+207272.1472	234
0Safe+0Safe_safe+safe_207086.1286+207295.1495	223
0Safe+0Safe_safe+safe_207086.1286+207412.862	185
0Safe+0Safe_safe+safe_207086.1286+207644.2345	297
0Safe+0Safe_safe+safe_207086.1286+207736.2437	187
0Safe+0Safe_safe+safe_207086.1286+207762.2463	172
0Safe+0Safe_safe+safe_207086.1286+207933.2634	62
0Safe+0Safe_safe+safe_207086.1286+208027.2728	202
0Safe+0Safe_safe+safe_207086.1286+208233.2934	347
0Safe+0Safe_safe+safe_207086.1286+208249.2950	141
0Safe+0Safe_safe+safe_207086.1286+208251.2952	163
0Safe+0Safe_safe+safe_207086.1286+208266.2967	177
0Safe+0Safe_safe+safe_207086.1286+208280.2981	147
0Safe+0Safe_safe+safe_207086.1286+208288.2989	219
0Safe+0Safe_safe+safe_207086.1286+208334.13	208
0Safe+0Safe_safe+safe_207086.1286+208691.451	157
0Safe+0Safe_safe+safe_207086.1286+208974.706	177
0Safe+0Safe_safe+safe_207086.1286+209014.742	193
0Safe+0Safe_safe+safe_207086.1286+209157.3858	220
0Safe+0Safe_safe+safe_207086.1286+209400.4101	251
0Safe+0Safe_safe+safe_207086.1286+209597.4298	117
0Safe+0Safe_safe+safe_207086.1286+209963.3164	146
0Safe+0Safe_safe+safe_207086.1286+209973.3174	257
0Safe+0Safe_safe+safe_207086.1286+209990.3191	151
0Safe+0Safe_safe+safe_207086.1286+210140.3341	222
0Safe+0Safe_safe+safe_207086.1286+210313.3514	188
0Safe+0Safe_safe+safe_207086.1286+210540.3741	217
0Safe+0Safe_safe+safe_207086.1286+210725.6176	197
0Safe+0Safe_safe+safe_207086.1286+210743.6194	116
0Safe+0Safe_safe+safe_207086.1286+210809.6260	179
0Safe+0Safe_safe+safe_207086.1286+210925.6376	121
0Safe+0Safe_safe+safe_207086.1286+210935.6386	134
0Safe+0Safe_safe+safe_207086.1286+210946.6397	205
0Safe+0Safe_safe+safe_207086.1286+211135.6586	157
0Safe+0Safe_safe+safe_207133.1333+207133.1333	160
0Safe+0Safe_safe+safe_207133.1333+207268.1468	140
0Safe+0Safe_safe+safe_207133.1333+207272.1472	217
0Safe+0Safe_safe+safe_207133.1333+207295.1495	226
0Safe+0Safe_safe+safe_207133.1333+207412.862	208
0Safe+0Safe_safe+safe_207133.1333+207644.2345	199
0Safe+0Safe_safe+safe_207133.1333+207736.2437	191
0Safe+0Safe_safe+safe_207133.1333+207762.2463	127
0Safe+0Safe_safe+safe_207133.1333+207933.2634	191
0Safe+0Safe_safe+safe_207133.1333+208027.2728	126
0Safe+0Safe_safe+safe_207133.1333+208233.2934	221
0Safe+0Safe_safe+safe_207133.1333+208249.2950	219
0Safe+0Safe_safe+safe_207133.1333+208251.2952	217
0Safe+0Safe_safe+safe_207133.1333+208266.2967	143
0Safe+0Safe_safe+safe_207133.1333+208280.2981	268
0Safe+0Safe_safe+safe_207133.1333+208288.2989	214
0Safe+0Safe_safe+safe_207133.1333+208334.13	153
0Safe+0Safe_safe+safe_207133.1333+208691.451	284
0Safe+0Safe_safe+safe_207133.1333+208974.706	215
0Safe+0Safe_safe+safe_207133.1333+209014.742	121
0Safe+0Safe_safe+safe_207133.1333+209157.3858	271
0Safe+0Safe_safe+safe_207133.1333+209400.4101	250
0Safe+0Safe_safe+safe_207133.1333+209597.4298	206
0Safe+0Safe_safe+safe_207133.1333+209963.3164	170
0Safe+0Safe_safe+safe_207133.1333+209973.3174	249
0Safe+0Safe_safe+safe_207133.1333+209990.3191	117
0Safe+0Safe_safe+safe_207133.1333+210140.3341	199
0Safe+0Safe_safe+safe_207133.1333+210313.3514	309
0Safe+0Safe_safe+safe_207133.1333+210540.3741	335
0Safe+0Safe_safe+safe_207133.1333+210725.6176	163
0Safe+0Safe_safe+safe_207133.1333+210743.6194	189
0Safe+0Safe_safe+safe_207133.1333+210809.6260	88
0Safe+0Safe_safe+safe_207133.1333+210925.6376	94
0Safe+0Safe_safe+safe_207133.1333+210935.6386	139
0Safe+0Safe_safe+safe_207133.1333+210946.6397	208
0Safe+0Safe_safe+safe_207133.1333+211135.6586	188
0Safe+0Safe_safe+safe_207268.1468+207268.1468	13
0Safe+0Safe_safe+safe_207268.1468+207272.1472	199
0Safe+0Safe_safe+safe_207268.1468+207295.1495	200
0Safe+0Safe_safe+safe_207268.1468+207412.862	151
0Safe+0Safe_safe+safe_207268.1468+207644.2345	213
0Safe+0Safe_safe+safe_207268.1468+207736.2437	116
0Safe+0Safe_safe+safe_207268.1468+207762.2463	54
0Safe+0Safe_safe+safe_207268.1468+207933.2634	96
0Safe+0Safe_safe+safe_207268.1468+208027.2728	86
0Safe+0Safe_safe+safe_207268.1468+208233.2934	106
0Safe+0Safe_safe+safe_207268.1468+208249.2950	54
0Safe+0Safe_safe+safe_207268.1468+208251.2952	85
0Safe+0Safe_safe+safe_207268.1468+208266.2967	164
0Safe+0Safe_safe+safe_207268.1468+208280.2981	184
0Safe+0Safe_safe+safe_207268.1468+208288.2989	168
0Safe+0Safe_safe+safe_207268.1468+208334.13	207
0Safe+0Safe_safe+safe_207268.1468+208691.451	123
0Safe+0Safe_safe+safe_207268.1468+208974.706	312
0Safe+0Safe_safe+safe_207268.1468+209014.742	69
0Safe+0Safe_safe+safe_207268.1468+209157.3858	144
0Safe+0Safe_safe+safe_207268.1468+209400.4101	101
0Safe+0Safe_safe+safe_207268.1468+209597.4298	53
0Safe+0Safe_safe+safe_207268.1468+209963.3164	210
0Safe+0Safe_safe+safe_207268.1468+209973.3174	242
0Safe+0Safe_safe+safe_207268.1468+209990.3191	94
0Safe+0Safe_safe+safe_207268.1468+210140.3341	127
0Safe+0Safe_safe+safe_207268.1468+210313.3514	130
0Safe+0Safe_safe+safe_207268.1468+210540.3741	253
0Safe+0Safe_safe+safe_207268.1468+210725.6176	227
0Safe+0Safe_safe+safe_207268.1468+210743.6194	126
0Safe+0Safe_safe+safe_207268.1468+210809.6260	114
0Safe+0Safe_safe+safe_207268.1468+210925.6376	138
0Safe+0Safe_safe+safe_207268.1468+210935.6386	70
0Safe+0Safe_safe+safe_207268.1468+210946.6397	173
0Safe+0Safe_safe+safe_207268.1468+211135.6586	188
0Safe+0Safe_safe+safe_207272.1472+207272.1472	68
0Safe+0Safe_safe+safe_207272.1472+207295.1495	266
0Safe+0Safe_safe+safe_207272.1472+207412.862	163
0Safe+0Safe_safe+safe_207272.1472+207644.2345	175
0Safe+0Safe_safe+safe_207272.1472+207736.2437	125
0Safe+0Safe_safe+safe_207272.1472+207762.2463	134
0Safe+0Safe_safe+safe_207272.1472+207933.2634	248
0Safe+0Safe_safe+safe_207272.1472+208027.2728	134
0Safe+0Safe_safe+safe_207272.1472+208233.2934	204
0Safe+0Safe_safe+safe_207272.1472+208249.2950	252
0Safe+0Safe_safe+safe_207272.1472+208251.2952	162
0Safe+0Safe_safe+safe_207272.1472+208266.2967	118
0Safe+0Safe_safe+safe_207272.1472+208280.2981	267
0Safe+0Safe_safe+safe_207272.1472+208288.2989	133
0Safe+0Safe_safe+safe_207272.1472+208334.13	300
0Safe+0Safe_safe+safe_207272.1472+208691.451	173
0Safe+0Safe_safe+safe_207272.1472+208974.706	174
0Safe+0Safe_safe+safe_207272.1472+209014.742	219
0Safe+0Safe_safe+safe_207272.1472+209157.3858	122
0Safe+0Safe_safe+safe_207272.1472+209400.4101	219
0Safe+0Safe_safe+safe_207272.1472+209597.4298	202
0Safe+0Safe_safe+safe_207272.1472+209963.3164	186
0Safe+0Safe_safe+safe_207272.1472+209973.3174	219
0Safe+0Safe_safe+safe_207272.1472+209990.3191	143
0Safe+0Safe_safe+safe_207272.1472+210140.3341	254
0Safe+0Safe_safe+safe_207272.1472+210313.3514	200
0Safe+0Safe_safe+safe_207272.1472+210540.3741	177
0Safe+0Safe_safe+safe_207272.1472+210725.6176	469
0Safe+0Safe_safe+safe_207272.1472+210743.6194	153
0Safe+0Safe_safe+safe_207272.1472+210809.6260	184
0Safe+0Safe_safe+safe_207272.1472+210925.6376	149
0Safe+0Safe_safe+safe_207272.1472+210935.6386	238
0Safe+0Safe_safe+safe_207272.1472+210946.6397	245
0Safe+0Safe_safe+safe_207272.1472+211135.6586	170
0Safe+0Safe_safe+safe_207295.1495+207295.1495	33
0Safe+0Safe_safe+safe_207295.1495+207412.862	170
0Safe+0Safe_safe+safe_207295.1495+207644.2345	247
0Safe+0Safe_safe+safe_207295.1495+207736.2437	201
0Safe+0Safe_safe+safe_207295.1495+207762.2463	138
0Safe+0Safe_safe+safe_207295.1495+207933.2634	300
0Safe+0Safe_safe+safe_207295.1495+208027.2728	80
0Safe+0Safe_safe+safe_207295.1495+208233.2934	355
0Safe+0Safe_safe+safe_207295.1495+208249.2950	157
0Safe+0Safe_safe+safe_207295.1495+208251.2952	169
0Safe+0Safe_safe+safe_207295.1495+208266.2967	164
0Safe+0Safe_safe+safe_207295.1495+208280.2981	223
0Safe+0Safe_safe+safe_207295.1495+208288.2989	131
0Safe+0Safe_safe+safe_207295.1495+208334.13	99
0Safe+0Safe_safe+safe_207295.1495+208691.451	207
0Safe+0Safe_safe+safe_207295.1495+208974.706	245
0Safe+0Safe_safe+safe_207295.1495+209014.742	179
0Safe+0Safe_safe+safe_207295.1495+209157.3858	209
0Safe+0Safe_safe+safe_207295.1495+209400.4101	264
0Safe+0Safe_safe+safe_207295.1495+209597.4298	223
0Safe+0Safe_safe+safe_207295.1495+209963.3164	174
0Safe+0Safe_safe+safe_207295.1495+209973.3174	306
0Safe+0Safe_safe+safe_207295.1495+209990.3191	102
0Safe+0Safe_safe+safe_207295.1495+210140.3341	236
0Safe+0Safe_safe+safe_207295.1495+210313.3514	178
0Safe+0Safe_safe+safe_207295.1495+210540.3741	305
0Safe+0Safe_safe+safe_207295.1495+210725.6176	193
0Safe+0Safe_safe+safe_207295.1495+210743.6194	289
0Safe+0Safe_safe+safe_207295.1495+210809.6260	111
0Safe+0Safe_safe+safe_207295.1495+210925.6376	185
0Safe+0Safe_safe+safe_207295.1495+210935.6386	236
0Safe+0Safe_safe+safe_207295.1495+210946.6397	170
0Safe+0Safe_safe+safe_207295.1495+211135.6586	168
0Safe+0Safe_safe+safe_207412.862+207412.862	45
0Safe+0Safe_safe+safe_207412.862+207644.2345	330
0Safe+0Safe_safe+safe_207412.862+207736.2437	152
0Safe+0Safe_safe+safe_207412.862+207762.2463	169
0Safe+0Safe_safe+safe_207412.862+207933.2634	259
0Safe+0Safe_safe+safe_207412.862+208027.2728	117
0Safe+0Safe_safe+safe_207412.862+208233.2934	131
0Safe+0Safe_safe+safe_207412.862+208249.2950	143
0Safe+0Safe_safe+safe_207412.862+208251.2952	163
0Safe+0Safe_safe+safe_207412.862+208266.2967	166
0Safe+0Safe_safe+safe_207412.862+208280.2981	110
0Safe+0Safe_safe+safe_207412.862+208288.2989	144
0Safe+0Safe_safe+safe_207412.862+208334.13	256
0Safe+0Safe_safe+safe_207412.862+208691.451	109
0Safe+0Safe_safe+safe_207412.862+208974.706	187
0Safe+0Safe_safe+safe_207412.862+209014.742	134
0Safe+0Safe_safe+safe_207412.862+209157.3858	225
0Safe+0Safe_safe+safe_207412.862+209400.4101	116
0Safe+0Safe_safe+safe_207412.862+209597.4298	116
0Safe+0Safe_safe+safe_207412.862+209963.3164	190
0Safe+0Safe_safe+safe_207412.862+209973.3174	242
0Safe+0Safe_safe+safe_207412.862+209990.3191	192
0Safe+0Safe_safe+safe_207412.862+210140.3341	198
0Safe+0Safe_safe+safe_207412.862+210313.3514	258
0Safe+0Safe_safe+safe_207412.862+210540.3741	161
0Safe+0Safe_safe+safe_207412.862+210725.6176	160
0Safe+0Safe_safe+safe_207412.862+210743.6194	71
0Safe+0Safe_safe+safe_207412.862+210809.6260	204
0Safe+0Safe_safe+safe_207412.862+210925.6376	151
0Safe+0Safe_safe+safe_207412.862+210935.6386	206
0Safe+0Safe_safe+safe_207412.862+210946.6397	109
0Safe+0Safe_safe+safe_207412.862+211135.6586	110
0Safe+0Safe_safe+safe_207644.2345+207644.2345	93
0Safe+0Safe_safe+safe_207644.2345+207736.2437	129
0Safe+0Safe_safe+safe_207644.2345+207762.2463	153
0Safe+0Safe_safe+safe_207644.2345+207933.2634	107
0Safe+0Safe_safe+safe_207644.2345+208027.2728	221
0Safe+0Safe_safe+safe_207644.2345+208233.2934	235
0Safe+0Safe_safe+safe_207644.2345+208249.2950	177
0Safe+0Safe_safe+safe_207644.2345+208251.2952	237
0Safe+0Safe_safe+safe_207644.2345+208266.2967	174
0Safe+0Safe_safe+safe_207644.2345+208280.2981	256
0Safe+0Safe_safe+safe_207644.2345+208288.2989	175
0Safe+0Safe_safe+safe_207644.2345+208334.13	232
0Safe+0Safe_safe+safe_207644.2345+208691.451	357
0Safe+0Safe_safe+safe_207644.2345+208974.706	218
0Safe+0Safe_safe+safe_207644.2345+209014.742	120
0Safe+0Safe_safe+safe_207644.2345+209157.3858	169
0Safe+0Safe_safe+safe_207644.2345+209400.4101	210
0Safe+0Safe_safe+safe_207644.2345+209597.4298	300
0Safe+0Safe_safe+safe_207644.2345+209963.3164	244
0Safe+0Safe_safe+safe_207644.2345+209973.3174	335
0Safe+0Safe_safe+safe_207644.2345+209990.3191	149
0Safe+0Safe_safe+safe_207644.2345+210140.3341	211
0Safe+0Safe_safe+safe_207644.2345+210313.3514	199
0Safe+0Safe_safe+safe_207644.2345+210540.3741	230
0Safe+0Safe_safe+safe_207644.2345+210725.6176	168
0Safe+0Safe_safe+safe_207644.2345+210743.6194	161
0Safe+0Safe_safe+safe_207644.2345+210809.6260	154
0Safe+0Safe_safe+safe_207644.2345+210925.6376	137
0Safe+0Safe_safe+safe_207644.2345+210935.6386	102
0Safe+0Safe_safe+safe_207644.2345+210946.6397	246
0Safe+0Safe_safe+safe_207644.2345+211135.6586	187
0Safe+0Safe_safe+safe_207736.2437+207736.2437	33
0Safe+0Safe_safe+safe_207736.2437+207762.2463	282
0Safe+0Safe_safe+safe_207736.2437+207933.2634	223
0Safe+0Safe_safe+safe_207736.2437+208027.2728	108
0Safe+0Safe_safe+safe_207736.2437+208233.2934	144
0Safe+0Safe_safe+safe_207736.2437+208249.2950	145
0Safe+0Safe_safe+safe_207736.2437+208251.2952	80
0Safe+0Safe_safe+safe_207736.2437+208266.2967	352
0Safe+0Safe_safe+safe_207736.2437+208280.2981	140
0Safe+0Safe_safe+safe_207736.2437+208288.2989	143
0Safe+0Safe_safe+safe_207736.2437+208334.13	136
0Safe+0Safe_safe+safe_207736.2437+208691.451	213
0Safe+0Safe_safe+safe_207736.2437+208974.706	213
0Safe+0Safe_safe+safe_207736.2437+209014.742	196
0Safe+0Safe_safe+safe_207736.2437+209157.3858	131
0Safe+0Safe_safe+safe_207736.2437+209400.4101	288
0Safe+0Safe_safe+safe_207736.2437+209597.4298	154
0Safe+0Safe_safe+safe_207736.2437+209963.3164	237
0Safe+0Safe_safe+safe_207736.2437+209973.3174	215
0Safe+0Safe_safe+safe_207736.2437+209990.3191	177
0Safe+0Safe_safe+safe_207736.2437+210140.3341	302
0Safe+0Safe_safe+safe_207736.2437+210313.3514	85
0Safe+0Safe_safe+safe_207736.2437+210540.3741	235
0Safe+0Safe_safe+safe_207736.2437+210725.6176	265
0Safe+0Safe_safe+safe_207736.2437+210743.6194	170
0Safe+0Safe_safe+safe_207736.2437+210809.6260	197
0Safe+0Safe_safe+safe_207736.2437+210925.6376	101
0Safe+0Safe_safe+safe_207736.2437+210935.6386	121
0Safe+0Safe_safe+safe_207736.2437+210946.6397	167
0Safe+0Safe_safe+safe_207736.2437+211135.6586	151
0Safe+0Safe_safe+safe_207762.2463+207762.2463	35
0Safe+0Safe_safe+safe_207762.2463+207933.2634	113
0Safe+0Safe_safe+safe_207762.2463+208027.2728	125
0Safe+0Safe_safe+safe_207762.2463+208233.2934	147
0Safe+0Safe_safe+safe_207762.2463+208249.2950	154
0Safe+0Safe_safe+safe_207762.2463+208251.2952	127
0Safe+0Safe_safe+safe_207762.2463+208266.2967	103
0Safe+0Safe_safe+safe_207762.2463+208280.2981	197
0Safe+0Safe_safe+safe_207762.2463+208288.2989	150
0Safe+0Safe_safe+safe_207762.2463+208334.13	212
0Safe+0Safe_safe+safe_207762.2463+208691.451	107
0Safe+0Safe_safe+safe_207762.2463+208974.706	164
0Safe+0Safe_safe+safe_207762.2463+209014.742	165
0Safe+0Safe_safe+safe_207762.2463+209157.3858	194
0Safe+0Safe_safe+safe_207762.2463+209400.4101	224
0Safe+0Safe_safe+safe_207762.2463+209597.4298	120
0Safe+0Safe_safe+safe_207762.2463+209963.3164	68
0Safe+0Safe_safe+safe_207762.2463+209973.3174	188
0Safe+0Safe_safe+safe_207762.2463+209990.3191	185
0Safe+0Safe_safe+safe_207762.2463+210140.3341	258
0Safe+0Safe_safe+safe_207762.2463+210313.3514	130
0Safe+0Safe_safe+safe_207762.2463+210540.3741	172
0Safe+0Safe_safe+safe_207762.2463+210725.6176	153
0Safe+0Safe_safe+safe_207762.2463+210743.6194	159
0Safe+0Safe_safe+safe_207762.2463+210809.6260	224
0Safe+0Safe_safe+safe_207762.2463+210925.6376	128
0Safe+0Safe_safe+safe_207762.2463+210935.6386	143
0Safe+0Safe_safe+safe_207762.2463+210946.6397	96
0Safe+0Safe_safe+safe_207762.2463+211135.6586	112
0Safe+0Safe_safe+safe_207933.2634+207933.2634	61
0Safe+0Safe_safe+safe_207933.2634+208027.2728	98
0Safe+0Safe_safe+safe_207933.2634+208233.2934	180
0Safe+0Safe_safe+safe_207933.2634+208249.2950	122
0Safe+0Safe_safe+safe_207933.2634+208251.2952	253
0Safe+0Safe_safe+safe_207933.2634+208266.2967	194
0Safe+0Safe_safe+safe_207933.2634+208280.2981	215
0Safe+0Safe_safe+safe_207933.2634+208288.2989	275
0Safe+0Safe_safe+safe_207933.2634+208334.13	138
0Safe+0Safe_safe+safe_207933.2634+208691.451	126
0Safe+0Safe_safe+safe_207933.2634+208974.706	223
0Safe+0Safe_safe+safe_207933.2634+209014.742	69
0Safe+0Safe_safe+safe_207933.2634+209157.3858	204
0Safe+0Safe_safe+safe_207933.2634+209400.4101	206
0Safe+0Safe_safe+safe_207933.2634+209597.4298	132
0Safe+0Safe_safe+safe_207933.2634+209963.3164	139
0Safe+0Safe_safe+safe_207933.2634+209973.3174	303
0Safe+0Safe_safe+safe_207933.2634+209990.3191	207
0Safe+0Safe_safe+safe_207933.2634+210140.3341	168
0Safe+0Safe_safe+safe_207933.2634+210313.3514	192
0Safe+0Safe_safe+safe_207933.2634+210540.3741	231
0Safe+0Safe_safe+safe_207933.2634+210725.6176	167
0Safe+0Safe_safe+safe_207933.2634+210743.6194	104
0Safe+0Safe_safe+safe_207933.2634+210809.6260	332
0Safe+0Safe_safe+safe_207933.2634+210925.6376	131
0Safe+0Safe_safe+safe_207933.2634+210935.6386	171
0Safe+0Safe_safe+safe_207933.2634+210946.6397	148
0Safe+0Safe_safe+safe_207933.2634+211135.6586	207
0Safe+0Safe_safe+safe_208027.2728+208027.2728	46
0Safe+0Safe_safe+safe_208027.2728+208233.2934	78
0Safe+0Safe_safe+safe_208027.2728+208249.2950	183
0Safe+0Safe_safe+safe_208027.2728+208251.2952	210
0Safe+0Safe_safe+safe_208027.2728+208266.2967	193
0Safe+0Safe_safe+safe_208027.2728+208280.2981	198
0Safe+0Safe_safe+safe_208027.2728+208288.2989	266
0Safe+0Safe_safe+safe_208027.2728+208334.13	96
0Safe+0Safe_safe+safe_208027.2728+208691.451	65
0Safe+0Safe_safe+safe_208027.2728+208974.706	122
0Safe+0Safe_safe+safe_208027.2728+209014.742	125
0Safe+0Safe_safe+safe_208027.2728+209157.3858	219
0Safe+0Safe_safe+safe_208027.2728+209400.4101	203
0Safe+0Safe_safe+safe_208027.2728+209597.4298	109
0Safe+0Safe_safe+safe_208027.2728+209963.3164	55
0Safe+0Safe_safe+safe_208027.2728+209973.3174	291
0Safe+0Safe_safe+safe_208027.2728+209990.3191	125
0Safe+0Safe_safe+safe_208027.2728+210140.3341	187
0Safe+0Safe_safe+safe_208027.2728+210313.3514	64
0Safe+0Safe_safe+safe_208027.2728+210540.3741	127
0Safe+0Safe_safe+safe_208027.2728+210725.6176	105
0Safe+0Safe_safe+safe_208027.2728+210743.6194	123
0Safe+0Safe_safe+safe_208027.2728+210809.6260	296
0Safe+0Safe_safe+safe_208027.2728+210925.6376	127
0Safe+0Safe_safe+safe_208027.2728+210935.6386	93
0Safe+0Safe_safe+safe_208027.2728+210946.6397	106
0Safe+0Safe_safe+safe_208027.2728+211135.6586	118
0Safe+0Safe_safe+safe_208233.2934+208233.2934	9
0Safe+0Safe_safe+safe_208233.2934+208249.2950	129
0Safe+0Safe_safe+safe_208233.2934+208251.2952	202
0Safe+0Safe_safe+safe_208233.2934+208266.2967	186
0Safe+0Safe_safe+safe_208233.2934+208280.2981	265
0Safe+0Safe_safe+safe_208233.2934+208288.2989	214
0Safe+0Safe_safe+safe_208233.2934+208334.13	139
0Safe+0Safe_safe+safe_208233.2934+208691.451	110
0Safe+0Safe_safe+safe_208233.2934+208974.706	167
0Safe+0Safe_safe+safe_208233.2934+209014.742	139
0Safe+0Safe_safe+safe_208233.2934+209157.3858	144
0Safe+0Safe_safe+safe_208233.2934+209400.4101	101
0Safe+0Safe_safe+safe_208233.2934+209597.4298	143
0Safe+0Safe_safe+safe_208233.2934+209963.3164	261
0Safe+0Safe_safe+safe_208233.2934+209973.3174	335
0Safe+0Safe_safe+safe_208233.2934+209990.3191	148
0Safe+0Safe_safe+safe_208233.2934+210140.3341	268
0Safe+0Safe_safe+safe_208233.2934+210313.3514	192
0Safe+0Safe_safe+safe_208233.2934+210540.3741	222
0Safe+0Safe_safe+safe_208233.2934+210725.6176	156
0Safe+0Safe_safe+safe_208233.2934+210743.6194	170
0Safe+0Safe_safe+safe_208233.2934+210809.6260	122
0Safe+0Safe_safe+safe_208233.2934+210925.6376	79
0Safe+0Safe_safe+safe_208233.2934+210935.6386	151
0Safe+0Safe_safe+safe_208233.2934+210946.6397	162
0Safe+0Safe_safe+safe_208233.2934+211135.6586	117
0Safe+0Safe_safe+safe_208249.2950+208249.2950	86
0Safe+0Safe_safe+safe_208249.2950+208251.2952	159
0Safe+0Safe_safe+safe_208249.2950+208266.2967	142
0Safe+0Safe_safe+safe_208249.2950+208280.2981	216
0Safe+0Safe_safe+safe_208249.2950+208288.2989	219
0Safe+0Safe_safe+safe_208249.2950+208334.13	82
0Safe+0Safe_safe+safe_208249.2950+208691.451	175
0Safe+0Safe_safe+safe_208249.2950+208974.706	183
0Safe+0Safe_safe+safe_208249.2950+209014.742	201
0Safe+0Safe_safe+safe_208249.2950+209157.3858	198
0Safe+0Safe_safe+safe_208249.2950+209400.4101	370
0Safe+0Safe_safe+safe_208249.2950+209597.4298	132
0Safe+0Safe_safe+safe_208249.2950+209963.3164	279
0Safe+0Safe_safe+safe_208249.2950+209973.3174	163
0Safe+0Safe_safe+safe_208249.2950+209990.3191	182
0Safe+0Safe_safe+safe_208249.2950+210140.3341	175
0Safe+0Safe_safe+safe_208249.2950+210313.3514	285
0Safe+0Safe_safe+safe_208249.2950+210540.3741	163
0Safe+0Safe_safe+safe_208249.2950+210725.6176	184
0Safe+0Safe_safe+safe_208249.2950+210743.6194	292
0Safe+0Safe_safe+safe_208249.2950+210809.6260	140
0Safe+0Safe_safe+safe_208249.2950+210925.6376	100
0Safe+0Safe_safe+safe_208249.2950+210935.6386	213
0Safe+0Safe_safe+safe_208249.2950+210946.6397	137
0Safe+0Safe_safe+safe_208249.2950+211135.6586	202
0Safe+0Safe_safe+safe_208251.2952+208251.2952	68
0Safe+0Safe_safe+safe_208251.2952+208266.2967	201
0Safe+0Safe_safe+safe_208251.2952+208280.2981	209
0Safe+0Safe_safe+safe_208251.2952+208288.2989	221
0Safe+0Safe_safe+safe_208251.2952+208334.13	180
0Safe+0Safe_safe+safe_208251.2952+208691.451	206
0Safe+0Safe_safe+safe_208251.2952+208974.706	323
0Safe+0Safe_safe+safe_208251.2952+209014.742	150
0Safe+0Safe_safe+safe_208251.2952+209157.3858	687
0Safe+0Safe_safe+safe_208251.2952+209400.4101	219
0Safe+0Safe_safe+safe_208251.2952+209597.4298	121
0Safe+0Safe_safe+safe_208251.2952+209963.3164	206
0Safe+0Safe_safe+safe_208251.2952+209973.3174	659
0Safe+0Safe_safe+safe_208251.2952+209990.3191	298
0Safe+0Safe_safe+safe_208251.2952+210140.3341	212
0Safe+0Safe_safe+safe_208251.2952+210313.3514	314
0Safe+0Safe_safe+safe_208251.2952+210540.3741	261
0Safe+0Safe_safe+safe_208251.2952+210725.6176	166
0Safe+0Safe_safe+safe_208251.2952+210743.6194	148
0Safe+0Safe_safe+safe_208251.2952+210809.6260	244
0Safe+0Safe_safe+safe_208251.2952+210925.6376	89
0Safe+0Safe_safe+safe_208251.2952+210935.6386	173
0Safe+0Safe_safe+safe_208251.2952+210946.6397	200
0Safe+0Safe_safe+safe_208251.2952+211135.6586	397
0Safe+0Safe_safe+safe_208266.2967+208266.2967	54
0Safe+0Safe_safe+safe_208266.2967+208280.2981	302
0Safe+0Safe_safe+safe_208266.2967+208288.2989	186
0Safe+0Safe_safe+safe_208266.2967+208334.13	173
0Safe+0Safe_safe+safe_208266.2967+208691.451	156
0Safe+0Safe_safe+safe_208266.2967+208974.706	235
0Safe+0Safe_safe+safe_208266.2967+209014.742	159
0Safe+0Safe_safe+safe_208266.2967+209157.3858	387
0Safe+0Safe_safe+safe_208266.2967+209400.4101	123
0Safe+0Safe_safe+safe_208266.2967+209597.4298	201
0Safe+0Safe_safe+safe_208266.2967+209963.3164	190
0Safe+0Safe_safe+safe_208266.2967+209973.3174	224
0Safe+0Safe_safe+safe_208266.2967+209990.3191	193
0Safe+0Safe_safe+safe_208266.2967+210140.3341	282
0Safe+0Safe_safe+safe_208266.2967+210313.3514	111
0Safe+0Safe_safe+safe_208266.2967+210540.3741	209
0Safe+0Safe_safe+safe_208266.2967+210725.6176	174
0Safe+0Safe_safe+safe_208266.2967+210743.6194	186
0Safe+0Safe_safe+safe_208266.2967+210809.6260	229
0Safe+0Safe_safe+safe_208266.2967+210925.6376	72
0Safe+0Safe_safe+safe_208266.2967+210935.6386	164
0Safe+0Safe_safe+safe_208266.2967+210946.6397	116
0Safe+0Safe_safe+safe_208266.2967+211135.6586	173
0Safe+0Safe_safe+safe_208280.2981+208280.2981	81
0Safe+0Safe_safe+safe_208280.2981+208288.2989	234
0Safe+0Safe_safe+safe_208280.2981+208334.13	249
0Safe+0Safe_safe+safe_208280.2981+208691.451	192
0Safe+0Safe_safe+safe_208280.2981+208974.706	216
0Safe+0Safe_safe+safe_208280.2981+209014.742	231
0Safe+0Safe_safe+safe_208280.2981+209157.3858	177
0Safe+0Safe_safe+safe_208280.2981+209400.4101	114
0Safe+0Safe_safe+safe_208280.2981+209597.4298	160
0Safe+0Safe_safe+safe_208280.2981+209963.3164	227
0Safe+0Safe_safe+safe_208280.2981+209973.3174	316
0Safe+0Safe_safe+safe_208280.2981+209990.3191	136
0Safe+0Safe_safe+safe_208280.2981+210140.3341	328
0Safe+0Safe_safe+safe_208280.2981+210313.3514	176
0Safe+0Safe_safe+safe_208280.2981+210540.3741	247
0Safe+0Safe_safe+safe_208280.2981+210725.6176	273
0Safe+0Safe_safe+safe_208280.2981+210743.6194	262
0Safe+0Safe_safe+safe_208280.2981+210809.6260	205
0Safe+0Safe_safe+safe_208280.2981+210925.6376	138
0Safe+0Safe_safe+safe_208280.2981+210935.6386	153
0Safe+0Safe_safe+safe_208280.2981+210946.6397	256
0Safe+0Safe_safe+safe_208280.2981+211135.6586	228
0Safe+0Safe_safe+safe_208288.2989+208288.2989	100
0Safe+0Safe_safe+safe_208288.2989+208334.13	162
0Safe+0Safe_safe+safe_208288.2989+208691.451	152
0Safe+0Safe_safe+safe_208288.2989+208974.706	274
0Safe+0Safe_safe+safe_208288.2989+209014.742	122
0Safe+0Safe_safe+safe_208288.2989+209157.3858	211
0Safe+0Safe_safe+safe_208288.2989+209400.4101	203
0Safe+0Safe_safe+safe_208288.2989+209597.4298	143
0Safe+0Safe_safe+safe_208288.2989+209963.3164	229
0Safe+0Safe_safe+safe_208288.2989+209973.3174	236
0Safe+0Safe_safe+safe_208288.2989+209990.3191	71
0Safe+0Safe_safe+safe_208288.2989+210140.3341	167
0Safe+0Safe_safe+safe_208288.2989+210313.3514	236
0Safe+0Safe_safe+safe_208288.2989+210540.3741	131
0Safe+0Safe_safe+safe_208288.2989+210725.6176	219
0Safe+0Safe_safe+safe_208288.2989+210743.6194	202
0Safe+0Safe_safe+safe_208288.2989+210809.6260	197
0Safe+0Safe_safe+safe_208288.2989+210925.6376	194
0Safe+0Safe_safe+safe_208288.2989+210935.6386	108
0Safe+0Safe_safe+safe_208288.2989+210946.6397	200
0Safe+0Safe_safe+safe_208288.2989+211135.6586	152
0Safe+0Safe_safe+safe_208334.13+208334.13	89
0Safe+0Safe_safe+safe_208334.13+208691.451	151
0Safe+0Safe_safe+safe_208334.13+208974.706	305
0Safe+0Safe_safe+safe_208334.13+209014.742	122
0Safe+0Safe_safe+safe_208334.13+209157.3858	211
0Safe+0Safe_safe+safe_208334.13+209400.4101	234
0Safe+0Safe_safe+safe_208334.13+209597.4298	188
0Safe+0Safe_safe+safe_208334.13+209963.3164	101
0Safe+0Safe_safe+safe_208334.13+209973.3174	178
0Safe+0Safe_safe+safe_208334.13+209990.3191	190
0Safe+0Safe_safe+safe_208334.13+210140.3341	151
0Safe+0Safe_safe+safe_208334.13+210313.3514	172
0Safe+0Safe_safe+safe_208334.13+210540.3741	223
0Safe+0Safe_safe+safe_208334.13+210725.6176	163
0Safe+0Safe_safe+safe_208334.13+210743.6194	156
0Safe+0Safe_safe+safe_208334.13+210809.6260	70
0Safe+0Safe_safe+safe_208334.13+210925.6376	126
0Safe+0Safe_safe+safe_208334.13+210935.6386	154
0Safe+0Safe_safe+safe_208334.13+210946.6397	122
0Safe+0Safe_safe+safe_208334.13+211135.6586	84
0Safe+0Safe_safe+safe_208691.451+208691.451	75
0Safe+0Safe_safe+safe_208691.451+208974.706	177
0Safe+0Safe_safe+safe_208691.451+209014.742	102
0Safe+0Safe_safe+safe_208691.451+209157.3858	226
0Safe+0Safe_safe+safe_208691.451+209400.4101	241
0Safe+0Safe_safe+safe_208691.451+209597.4298	253
0Safe+0Safe_safe+safe_208691.451+209963.3164	170
0Safe+0Safe_safe+safe_208691.451+209973.3174	109
0Safe+0Safe_safe+safe_208691.451+209990.3191	133
0Safe+0Safe_safe+safe_208691.451+210140.3341	208
0Safe+0Safe_safe+safe_208691.451+210313.3514	129
0Safe+0Safe_safe+safe_208691.451+210540.3741	209
0Safe+0Safe_safe+safe_208691.451+210725.6176	104
0Safe+0Safe_safe+safe_208691.451+210743.6194	145
0Safe+0Safe_safe+safe_208691.451+210809.6260	156
0Safe+0Safe_safe+safe_208691.451+210925.6376	210
0Safe+0Safe_safe+safe_208691.451+210935.6386	75
0Safe+0Safe_safe+safe_208691.451+210946.6397	128
0Safe+0Safe_safe+safe_208691.451+211135.6586	144
0Safe+0Safe_safe+safe_208974.706+208974.706	126
0Safe+0Safe_safe+safe_208974.706+209014.742	122
0Safe+0Safe_safe+safe_208974.706+209157.3858	192
0Safe+0Safe_safe+safe_208974.706+209400.4101	365
0Safe+0Safe_safe+safe_208974.706+209597.4298	153
0Safe+0Safe_safe+safe_208974.706+209963.3164	404
0Safe+0Safe_safe+safe_208974.706+209973.3174	191
0Safe+0Safe_safe+safe_208974.706+209990.3191	283
0Safe+0Safe_safe+safe_208974.706+210140.3341	183
0Safe+0Safe_safe+safe_208974.706+210313.3514	222
0Safe+0Safe_safe+safe_208974.706+210540.3741	319
0Safe+0Safe_safe+safe_208974.706+210725.6176	273
0Safe+0Safe_safe+safe_208974.706+210743.6194	358
0Safe+0Safe_safe+safe_208974.706+210809.6260	302
0Safe+0Safe_safe+safe_208974.706+210925.6376	141
0Safe+0Safe_safe+safe_208974.706+210935.6386	338
0Safe+0Safe_safe+safe_208974.706+210946.6397	300
0Safe+0Safe_safe+safe_208974.706+211135.6586	249
0Safe+0Safe_safe+safe_209014.742+209014.742	40
0Safe+0Safe_safe+safe_209014.742+209157.3858	208
0Safe+0Safe_safe+safe_209014.742+209400.4101	144
0Safe+0Safe_safe+safe_209014.742+209597.4298	192
0Safe+0Safe_safe+safe_209014.742+209963.3164	171
0Safe+0Safe_safe+safe_209014.742+209973.3174	230
0Safe+0Safe_safe+safe_209014.742+209990.3191	144
0Safe+0Safe_safe+safe_209014.742+210140.3341	245
0Safe+0Safe_safe+safe_209014.742+210313.3514	77
0Safe+0Safe_safe+safe_209014.742+210540.3741	208
0Safe+0Safe_safe+safe_209014.742+210725.6176	98
0Safe+0Safe_safe+safe_209014.742+210743.6194	88
0Safe+0Safe_safe+safe_209014.742+210809.6260	87
0Safe+0Safe_safe+safe_209014.742+210925.6376	91
0Safe+0Safe_safe+safe_209014.742+210935.6386	139
0Safe+0Safe_safe+safe_209014.742+210946.6397	303
0Safe+0Safe_safe+safe_209014.742+211135.6586	238
0Safe+0Safe_safe+safe_209157.3858+209157.3858	67
0Safe+0Safe_safe+safe_209157.3858+209400.4101	122
0Safe+0Safe_safe+safe_209157.3858+209597.4298	186
0Safe+0Safe_safe+safe_209157.3858+209963.3164	239
0Safe+0Safe_safe+safe_209157.3858+209973.3174	312
0Safe+0Safe_safe+safe_209157.3858+209990.3191	186
0Safe+0Safe_safe+safe_209157.3858+210140.3341	295
0Safe+0Safe_safe+safe_209157.3858+210313.3514	121
0Safe+0Safe_safe+safe_209157.3858+210540.3741	190
0Safe+0Safe_safe+safe_209157.3858+210725.6176	139
0Safe+0Safe_safe+safe_209157.3858+210743.6194	190
0Safe+0Safe_safe+safe_209157.3858+210809.6260	226
0Safe+0Safe_safe+safe_209157.3858+210925.6376	135
0Safe+0Safe_safe+safe_209157.3858+210935.6386	124
0Safe+0Safe_safe+safe_209157.3858+210946.6397	245
0Safe+0Safe_safe+safe_209157.3858+211135.6586	180
0Safe+0Safe_safe+safe_209400.4101+209400.4101	59
0Safe+0Safe_safe+safe_209400.4101+209597.4298	123
0Safe+0Safe_safe+safe_209400.4101+209963.3164	255
0Safe+0Safe_safe+safe_209400.4101+209973.3174	204
0Safe+0Safe_safe+safe_209400.4101+209990.3191	123
0Safe+0Safe_safe+safe_209400.4101+210140.3341	224
0Safe+0Safe_safe+safe_209400.4101+210313.3514	144
0Safe+0Safe_safe+safe_209400.4101+210540.3741	338
0Safe+0Safe_safe+safe_209400.4101+210725.6176	68
0Safe+0Safe_safe+safe_209400.4101+210743.6194	155
0Safe+0Safe_safe+safe_209400.4101+210809.6260	169
0Safe+0Safe_safe+safe_209400.4101+210925.6376	98
0Safe+0Safe_safe+safe_209400.4101+210935.6386	92
0Safe+0Safe_safe+safe_209400.4101+210946.6397	100
0Safe+0Safe_safe+safe_209400.4101+211135.6586	116
0Safe+0Safe_safe+safe_209597.4298+209597.4298	13
0Safe+0Safe_safe+safe_209597.4298+209963.3164	236
0Safe+0Safe_safe+safe_209597.4298+209973.3174	329
0Safe+0Safe_safe+safe_209597.4298+209990.3191	264
0Safe+0Safe_safe+safe_209597.4298+210140.3341	202
0Safe+0Safe_safe+safe_209597.4298+210313.3514	98
0Safe+0Safe_safe+safe_209597.4298+210540.3741	274
0Safe+0Safe_safe+safe_209597.4298+210725.6176	144
0Safe+0Safe_safe+safe_209597.4298+210743.6194	189
0Safe+0Safe_safe+safe_209597.4298+210809.6260	99
0Safe+0Safe_safe+safe_209597.4298+210925.6376	151
0Safe+0Safe_safe+safe_209597.4298+210935.6386	289
0Safe+0Safe_safe+safe_209597.4298+210946.6397	227
0Safe+0Safe_safe+safe_209597.4298+211135.6586	354
0Safe+0Safe_safe+safe_209963.3164+209963.3164	46
0Safe+0Safe_safe+safe_209963.3164+209973.3174	220
0Safe+0Safe_safe+safe_209963.3164+209990.3191	111
0Safe+0Safe_safe+safe_209963.3164+210140.3341	102
0Safe+0Safe_safe+safe_209963.3164+210313.3514	242
0Safe+0Safe_safe+safe_209963.3164+210540.3741	157
0Safe+0Safe_safe+safe_209963.3164+210725.6176	178
0Safe+0Safe_safe+safe_209963.3164+210743.6194	75
0Safe+0Safe_safe+safe_209963.3164+210809.6260	113
0Safe+0Safe_safe+safe_209963.3164+210925.6376	102
0Safe+0Safe_safe+safe_209963.3164+210935.6386	150
0Safe+0Safe_safe+safe_209963.3164+210946.6397	174
0Safe+0Safe_safe+safe_209963.3164+211135.6586	150
0Safe+0Safe_safe+safe_209973.3174+209973.3174	109
0Safe+0Safe_safe+safe_209973.3174+209990.3191	128
0Safe+0Safe_safe+safe_209973.3174+210140.3341	346
0Safe+0Safe_safe+safe_209973.3174+210313.3514	288
0Safe+0Safe_safe+safe_209973.3174+210540.3741	358
0Safe+0Safe_safe+safe_209973.3174+210725.6176	428
0Safe+0Safe_safe+safe_209973.3174+210743.6194	231
0Safe+0Safe_safe+safe_209973.3174+210809.6260	143
0Safe+0Safe_safe+safe_209973.3174+210925.6376	221
0Safe+0Safe_safe+safe_209973.3174+210935.6386	251
0Safe+0Safe_safe+safe_209973.3174+210946.6397	331
0Safe+0Safe_safe+safe_209973.3174+211135.6586	190
0Safe+0Safe_safe+safe_209990.3191+209990.3191	31
0Safe+0Safe_safe+safe_209990.3191+210140.3341	162
0Safe+0Safe_safe+safe_209990.3191+210313.3514	163
0Safe+0Safe_safe+safe_209990.3191+210540.3741	199
0Safe+0Safe_safe+safe_209990.3191+210725.6176	93
0Safe+0Safe_safe+safe_209990.3191+210743.6194	108
0Safe+0Safe_safe+safe_209990.3191+210809.6260	93
0Safe+0Safe_safe+safe_209990.3191+210925.6376	156
0Safe+0Safe_safe+safe_209990.3191+210935.6386	226
0Safe+0Safe_safe+safe_209990.3191+210946.6397	249
0Safe+0Safe_safe+safe_209990.3191+211135.6586	104
0Safe+0Safe_safe+safe_210140.3341+210140.3341	67
0Safe+0Safe_safe+safe_210140.3341+210313.3514	211
0Safe+0Safe_safe+safe_210140.3341+210540.3741	360
0Safe+0Safe_safe+safe_210140.3341+210725.6176	214
0Safe+0Safe_safe+safe_210140.3341+210743.6194	221
0Safe+0Safe_safe+safe_210140.3341+210809.6260	338
0Safe+0Safe_safe+safe_210140.3341+210925.6376	147
0Safe+0Safe_safe+safe_210140.3341+210935.6386	240
0Safe+0Safe_safe+safe_210140.3341+210946.6397	221
0Safe+0Safe_safe+safe_210140.3341+211135.6586	182
0Safe+0Safe_safe+safe_210313.3514+210313.3514	126
0Safe+0Safe_safe+safe_210313.3514+210540.3741	157
0Safe+0Safe_safe+safe_210313.3514+210725.6176	106
0Safe+0Safe_safe+safe_210313.3514+210743.6194	115
0Safe+0Safe_safe+safe_210313.3514+210809.6260	163
0Safe+0Safe_safe+safe_210313.3514+210925.6376	112
0Safe+0Safe_safe+safe_210313.3514+210935.6386	238
0Safe+0Safe_safe+safe_210313.3514+210946.6397	145
0Safe+0Safe_safe+safe_210313.3514+211135.6586	142
0Safe+0Safe_safe+safe_210540.3741+210540.3741	49
0Safe+0Safe_safe+safe_210540.3741+210725.6176	190
0Safe+0Safe_safe+safe_210540.3741+210743.6194	111
0Safe+0Safe_safe+safe_210540.3741+210809.6260	183
0Safe+0Safe_safe+safe_210540.3741+210925.6376	164
0Safe+0Safe_safe+safe_210540.3741+210935.6386	208
0Safe+0Safe_safe+safe_210540.3741+210946.6397	173
0Safe+0Safe_safe+safe_210540.3741+211135.6586	198
0Safe+0Safe_safe+safe_210725.6176+210725.6176	49
0Safe+0Safe_safe+safe_210725.6176+210743.6194	77
0Safe+0Safe_safe+safe_210725.6176+210809.6260	158
0Safe+0Safe_safe+safe_210725.6176+210925.6376	76
0Safe+0Safe_safe+safe_210725.6176+210935.6386	111
0Safe+0Safe_safe+safe_210725.6176+210946.6397	124
0Safe+0Safe_safe+safe_210725.6176+211135.6586	112
0Safe+0Safe_safe+safe_210743.6194+210743.6194	57
0Safe+0Safe_safe+safe_210743.6194+210809.6260	65
0Safe+0Safe_safe+safe_210743.6194+210925.6376	129
0Safe+0Safe_safe+safe_210743.6194+210935.6386	73
0Safe+0Safe_safe+safe_210743.6194+210946.6397	254
0Safe+0Safe_safe+safe_210743.6194+211135.6586	88
0Safe+0Safe_safe+safe_210809.6260+210809.6260	16
0Safe+0Safe_safe+safe_210809.6260+210925.6376	129
0Safe+0Safe_safe+safe_210809.6260+210935.6386	185
0Safe+0Safe_safe+safe_210809.6260+210946.6397	275
0Safe+0Safe_safe+safe_210809.6260+211135.6586	151
0Safe+0Safe_safe+safe_210925.6376+210925.6376	37
0Safe+0Safe_safe+safe_210925.6376+210935.6386	106
0Safe+0Safe_safe+safe_210925.6376+210946.6397	180
0Safe+0Safe_safe+safe_210925.6376+211135.6586	92
0Safe+0Safe_safe+safe_210935.6386+210935.6386	57
0Safe+0Safe_safe+safe_210935.6386+210946.6397	181
0Safe+0Safe_safe+safe_210935.6386+211135.6586	131
0Safe+0Safe_safe+safe_210946.6397+210946.6397	93
0Safe+0Safe_safe+safe_210946.6397+211135.6586	203
0Safe+0Safe_safe+safe_211135.6586+211135.6586	78
AKAP9+AKAP9_P1P2+P1P2_5225+5225	11
AKAP9+AKAP9_P1P2+P1P2_5225+5229	17
AKAP9+AKAP9_P1P2+P1P2_5225+5230	45
AKAP9+AKAP9_P1P2+P1P2_5229+5229	1
AKAP9+AKAP9_P1P2+P1P2_5229+5230	10
AKAP9+AKAP9_P1P2+P1P2_5230+5230	17
AKAP9+ANAPC2_P1P2+P1P2_5225+6711	35
AKAP9+ANAPC2_P1P2+P1P2_5225+6716	14
AKAP9+ANAPC2_P1P2+P1P2_5225+6719	2
AKAP9+ANAPC2_P1P2+P1P2_5229+6716	9
AKAP9+ANAPC2_P1P2+P1P2_5229+6719	7
AKAP9+ANAPC2_P1P2+P1P2_5230+6711	48
AKAP9+ANAPC2_P1P2+P1P2_5230+6716	21
AKAP9+ANAPC2_P1P2+P1P2_5230+6719	1
AKAP9+AP1M1_P1P2+P1P2_5225+8191	36
AKAP9+AP1M1_P1P2+P1P2_5225+8195	17
AKAP9+AP1M1_P1P2+P1P2_5225+8199	118
AKAP9+AP1M1_P1P2+P1P2_5229+8191	8
AKAP9+AP1M1_P1P2+P1P2_5229+8195	36
AKAP9+AP1M1_P1P2+P1P2_5229+8199	48
AKAP9+AP1M1_P1P2+P1P2_5230+8191	19
AKAP9+AP1M1_P1P2+P1P2_5230+8195	27
AKAP9+AP1M1_P1P2+P1P2_5230+8199	20
AKAP9+AP2A1_P1P2+P1P2_5225+8241	63
AKAP9+AP2A1_P1P2+P1P2_5225+8243	8
AKAP9+AP2A1_P1P2+P1P2_5225+8244	1
AKAP9+AP2A1_P1P2+P1P2_5229+8241	18
AKAP9+AP2A1_P1P2+P1P2_5229+8243	41
AKAP9+AP2A1_P1P2+P1P2_5230+8241	20
AKAP9+AP2A1_P1P2+P1P2_5230+8243	40
AKAP9+AP2A1_P1P2+P1P2_5230+8244	9
AKAP9+ARL1_P1P2+P1P2_10491+5225	3
AKAP9+ARL1_P1P2+P1P2_10491+5229	14
AKAP9+ARL1_P1P2+P1P2_10491+5230	6
AKAP9+ARL1_P1P2+P1P2_10492+5225	1
AKAP9+ARL1_P1P2+P1P2_10492+5229	1
AKAP9+ARL1_P1P2+P1P2_10492+5230	3
AKAP9+ARL1_P1P2+P1P2_10498+5225	9
AKAP9+ARL1_P1P2+P1P2_10498+5229	33
AKAP9+ARL1_P1P2+P1P2_10498+5230	31
AKAP9+ASNA1_P1P2+P1P2_11971+5225	820
AKAP9+ASNA1_P1P2+P1P2_11971+5229	474
AKAP9+ASNA1_P1P2+P1P2_11971+5230	900
AKAP9+ASNA1_P1P2+P1P2_11973+5225	163
AKAP9+ASNA1_P1P2+P1P2_11973+5229	266
AKAP9+ASNA1_P1P2+P1P2_11973+5230	187
AKAP9+ASNA1_P1P2+P1P2_11977+5225	1347
AKAP9+ASNA1_P1P2+P1P2_11977+5229	637
AKAP9+ASNA1_P1P2+P1P2_11977+5230	466
AKAP9+ATP5A1_P1+P1P2_13072+5225	12
AKAP9+ATP5A1_P1+P1P2_13072+5229	24
AKAP9+ATP5A1_P1+P1P2_13073+5225	11
AKAP9+ATP5A1_P1+P1P2_13073+5229	23
AKAP9+ATP5A1_P1+P1P2_13073+5230	24
AKAP9+ATP5A1_P1+P1P2_13076+5225	46
AKAP9+ATP5A1_P1+P1P2_13076+5229	23
AKAP9+ATP5A1_P1+P1P2_13076+5230	34
AKAP9+ATP5B_P1P2+P1P2_13092+5225	2
AKAP9+ATP5B_P1P2+P1P2_13092+5230	3
AKAP9+ATP5B_P1P2+P1P2_13096+5225	5
AKAP9+ATP5B_P1P2+P1P2_13096+5229	13
AKAP9+ATP5B_P1P2+P1P2_13096+5230	1
AKAP9+BAG6_P1P2+P1P2_14691+5225	169
AKAP9+BAG6_P1P2+P1P2_14691+5229	96
AKAP9+BAG6_P1P2+P1P2_14691+5230	110
AKAP9+BAG6_P1P2+P1P2_14692+5225	23
AKAP9+BAG6_P1P2+P1P2_14692+5229	21
AKAP9+BAG6_P1P2+P1P2_14692+5230	21
AKAP9+BAG6_P1P2+P1P2_14694+5225	71
AKAP9+BAG6_P1P2+P1P2_14694+5229	70
AKAP9+BAG6_P1P2+P1P2_14694+5230	77
AKAP9+CAMLG_P1P2+P1P2_25801+5225	359
AKAP9+CAMLG_P1P2+P1P2_25801+5229	235
AKAP9+CAMLG_P1P2+P1P2_25801+5230	322
AKAP9+CAMLG_P1P2+P1P2_25802+5225	602
AKAP9+CAMLG_P1P2+P1P2_25802+5229	396
AKAP9+CAMLG_P1P2+P1P2_25802+5230	330
AKAP9+CAMLG_P1P2+P1P2_25803+5225	416
AKAP9+CAMLG_P1P2+P1P2_25803+5229	211
AKAP9+CAMLG_P1P2+P1P2_25803+5230	362
AKAP9+CCNA2_P1P2+P1P2_29242+5225	137
AKAP9+CCNA2_P1P2+P1P2_29242+5229	73
AKAP9+CCNA2_P1P2+P1P2_29242+5230	16
AKAP9+CCNA2_P1P2+P1P2_29248+5225	3
AKAP9+CCNA2_P1P2+P1P2_29248+5229	1
AKAP9+CCNA2_P1P2+P1P2_29248+5230	38
AKAP9+CCNA2_P1P2+P1P2_29250+5225	42
AKAP9+CCT3_P1P2+P1P2_29755+5225	2
AKAP9+CCT3_P1P2+P1P2_29758+5225	1
AKAP9+CCT3_P1P2+P1P2_29758+5229	2
AKAP9+CCT3_P1P2+P1P2_29758+5230	2
AKAP9+CCT4_P1P2+P1P2_29763+5225	12
AKAP9+CCT4_P1P2+P1P2_29763+5229	61
AKAP9+CCT4_P1P2+P1P2_29763+5230	4
AKAP9+CCT4_P1P2+P1P2_29768+5230	19
AKAP9+CCT4_P1P2+P1P2_29770+5225	6
AKAP9+CCT4_P1P2+P1P2_29770+5229	7
AKAP9+CCT4_P1P2+P1P2_29770+5230	2
AKAP9+CHAF1A_P1P2+P1P2_33862+5225	26
AKAP9+CHAF1A_P1P2+P1P2_33862+5229	5
AKAP9+CHAF1A_P1P2+P1P2_33862+5230	21
AKAP9+CHAF1A_P1P2+P1P2_33863+5225	7
AKAP9+CHAF1A_P1P2+P1P2_33863+5229	24
AKAP9+CHAF1A_P1P2+P1P2_33863+5230	11
AKAP9+CHAF1A_P1P2+P1P2_33869+5225	99
AKAP9+CHAF1A_P1P2+P1P2_33869+5230	3
AKAP9+COG3_P1P2+P1P2_37961+5225	12
AKAP9+COG3_P1P2+P1P2_37961+5229	4
AKAP9+COG3_P1P2+P1P2_37961+5230	27
AKAP9+COG3_P1P2+P1P2_37963+5225	8
AKAP9+COG3_P1P2+P1P2_37963+5229	10
AKAP9+COG3_P1P2+P1P2_37964+5230	2
AKAP9+COG4_P1P2+P1P2_37974+5225	2
AKAP9+COG4_P1P2+P1P2_37974+5229	5
AKAP9+COG4_P1P2+P1P2_37974+5230	57
AKAP9+COG4_P1P2+P1P2_37976+5225	12
AKAP9+COG4_P1P2+P1P2_37976+5229	3
AKAP9+COG4_P1P2+P1P2_37976+5230	1
AKAP9+COG4_P1P2+P1P2_37980+5225	4
AKAP9+COG4_P1P2+P1P2_37980+5229	39
AKAP9+COG4_P1P2+P1P2_37980+5230	36
AKAP9+COPA_P1P2+P1P2_38732+5229	1
AKAP9+COPA_P1P2+P1P2_38732+5230	4
AKAP9+COPA_P1P2+P1P2_38734+5225	15
AKAP9+COPA_P1P2+P1P2_38734+5229	1
AKAP9+COPA_P1P2+P1P2_38734+5230	2
AKAP9+COPA_P1P2+P1P2_38738+5225	14
AKAP9+COPA_P1P2+P1P2_38738+5229	21
AKAP9+COPA_P1P2+P1P2_38738+5230	3
AKAP9+COPB1_P1P2+P1P2_38741+5225	1
AKAP9+COPB1_P1P2+P1P2_38742+5225	1
AKAP9+COPB1_P1P2+P1P2_38742+5229	3
AKAP9+COPB1_P1P2+P1P2_38742+5230	1
AKAP9+COPB1_P1P2+P1P2_38743+5225	1
AKAP9+COPS4_P1P2+P1P2_38833+5225	20
AKAP9+COPS4_P1P2+P1P2_38833+5229	19
AKAP9+COPS4_P1P2+P1P2_38833+5230	53
AKAP9+COPS4_P1P2+P1P2_38834+5225	38
AKAP9+COPS4_P1P2+P1P2_38834+5229	38
AKAP9+COPS4_P1P2+P1P2_38834+5230	57
AKAP9+COPS4_P1P2+P1P2_38835+5225	7
AKAP9+COPS4_P1P2+P1P2_38835+5229	6
AKAP9+COPS4_P1P2+P1P2_38835+5230	2
AKAP9+COX7C_P1P2+P1P2_39372+5225	23
AKAP9+COX7C_P1P2+P1P2_39372+5229	24
AKAP9+COX7C_P1P2+P1P2_39372+5230	1
AKAP9+COX7C_P1P2+P1P2_39375+5225	1
AKAP9+COX7C_P1P2+P1P2_39375+5229	3
AKAP9+COX7C_P1P2+P1P2_39375+5230	30
AKAP9+COX7C_P1P2+P1P2_39376+5225	21
AKAP9+COX7C_P1P2+P1P2_39376+5229	12
AKAP9+COX7C_P1P2+P1P2_39376+5230	92
AKAP9+DCAF13_P1P2+P1P2_44661+5225	4
AKAP9+DCAF13_P1P2+P1P2_44661+5229	28
AKAP9+DCAF13_P1P2+P1P2_44661+5230	49
AKAP9+DCAF13_P1P2+P1P2_44662+5225	51
AKAP9+DCAF13_P1P2+P1P2_44662+5229	11
AKAP9+DCAF13_P1P2+P1P2_44662+5230	10
AKAP9+DCAF13_P1P2+P1P2_44668+5225	16
AKAP9+DCAF13_P1P2+P1P2_44668+5229	2
AKAP9+DCAF13_P1P2+P1P2_44668+5230	4
AKAP9+DCTN1_P1P2+P1P2_45121+5225	11
AKAP9+DCTN1_P1P2+P1P2_45121+5229	11
AKAP9+DCTN1_P1P2+P1P2_45121+5230	2
AKAP9+DCTN1_P1P2+P1P2_45122+5225	123
AKAP9+DCTN1_P1P2+P1P2_45122+5229	112
AKAP9+DCTN1_P1P2+P1P2_45122+5230	92
AKAP9+DCTN1_P1P2+P1P2_45130+5225	53
AKAP9+DCTN1_P1P2+P1P2_45130+5229	41
AKAP9+DCTN1_P1P2+P1P2_45130+5230	31
AKAP9+EIF3A_P1P2+P1P2_5225+53046	2
AKAP9+EIF3A_P1P2+P1P2_5225+53047	6
AKAP9+EIF3A_P1P2+P1P2_5225+53050	6
AKAP9+EIF3A_P1P2+P1P2_5229+53046	4
AKAP9+EIF3A_P1P2+P1P2_5229+53047	28
AKAP9+EIF3A_P1P2+P1P2_5229+53050	35
AKAP9+EIF3A_P1P2+P1P2_5230+53047	20
AKAP9+EIF3A_P1P2+P1P2_5230+53050	26
AKAP9+EIF3D_P1P2+P1P2_5225+53082	24
AKAP9+EIF3D_P1P2+P1P2_5225+53087	2
AKAP9+EIF3D_P1P2+P1P2_5225+53090	14
AKAP9+EIF3D_P1P2+P1P2_5229+53082	3
AKAP9+EIF3D_P1P2+P1P2_5229+53087	1
AKAP9+EIF3D_P1P2+P1P2_5229+53090	2
AKAP9+EIF3D_P1P2+P1P2_5230+53082	1
AKAP9+EIF3D_P1P2+P1P2_5230+53090	13
AKAP9+EIF3H_P1P2+P1P2_5225+53121	10
AKAP9+EIF3H_P1P2+P1P2_5225+53124	19
AKAP9+EIF3H_P1P2+P1P2_5225+53128	2
AKAP9+EIF3H_P1P2+P1P2_5229+53124	14
AKAP9+EIF3H_P1P2+P1P2_5230+53121	5
AKAP9+EIF3H_P1P2+P1P2_5230+53124	1
AKAP9+EIF3H_P1P2+P1P2_5230+53128	3
AKAP9+EIF3L_P1P2+P1P2_5225+53161	23
AKAP9+EIF3L_P1P2+P1P2_5225+53164	42
AKAP9+EIF3L_P1P2+P1P2_5225+53165	73
AKAP9+EIF3L_P1P2+P1P2_5229+53161	23
AKAP9+EIF3L_P1P2+P1P2_5229+53164	60
AKAP9+EIF3L_P1P2+P1P2_5229+53165	10
AKAP9+EIF3L_P1P2+P1P2_5230+53161	22
AKAP9+EIF3L_P1P2+P1P2_5230+53164	27
AKAP9+EIF3L_P1P2+P1P2_5230+53165	39
AKAP9+EIF6_P1P2+P1P2_5225+53432	7
AKAP9+EIF6_P1P2+P1P2_5225+53433	4
AKAP9+EIF6_P1P2+P1P2_5225+53434	6
AKAP9+EIF6_P1P2+P1P2_5229+53432	5
AKAP9+EIF6_P1P2+P1P2_5229+53433	5
AKAP9+EIF6_P1P2+P1P2_5229+53434	1
AKAP9+EIF6_P1P2+P1P2_5230+53432	5
AKAP9+EIF6_P1P2+P1P2_5230+53433	11
AKAP9+ERP44_P1P2+P1P2_5225+55852	514
AKAP9+ERP44_P1P2+P1P2_5225+55853	258
AKAP9+ERP44_P1P2+P1P2_5225+55856	602
AKAP9+ERP44_P1P2+P1P2_5229+55852	293
AKAP9+ERP44_P1P2+P1P2_5229+55853	275
AKAP9+ERP44_P1P2+P1P2_5229+55856	390
AKAP9+ERP44_P1P2+P1P2_5230+55852	359
AKAP9+ERP44_P1P2+P1P2_5230+55853	254
AKAP9+ERP44_P1P2+P1P2_5230+55856	396
AKAP9+GET4_P1P2+P1P2_5225+68261	116
AKAP9+GET4_P1P2+P1P2_5225+68262	86
AKAP9+GET4_P1P2+P1P2_5225+68263	61
AKAP9+GET4_P1P2+P1P2_5229+68261	49
AKAP9+GET4_P1P2+P1P2_5229+68262	54
AKAP9+GET4_P1P2+P1P2_5229+68263	56
AKAP9+GET4_P1P2+P1P2_5230+68261	79
AKAP9+GET4_P1P2+P1P2_5230+68262	138
AKAP9+GET4_P1P2+P1P2_5230+68263	39
AKAP9+GMDS_P1P2+P1P2_5225+69971	6757
AKAP9+GMDS_P1P2+P1P2_5225+69973	3855
AKAP9+GMDS_P1P2+P1P2_5225+69979	2763
AKAP9+GMDS_P1P2+P1P2_5229+69971	3626
AKAP9+GMDS_P1P2+P1P2_5229+69973	4194
AKAP9+GMDS_P1P2+P1P2_5229+69979	2363
AKAP9+GMDS_P1P2+P1P2_5230+69971	2989
AKAP9+GMDS_P1P2+P1P2_5230+69973	2915
AKAP9+GMDS_P1P2+P1P2_5230+69979	2423
AKAP9+GOLIM4_P1P2+P1P2_5225+70816	34
AKAP9+GOLIM4_P1P2+P1P2_5225+70817	24
AKAP9+GOLIM4_P1P2+P1P2_5225+70818	10
AKAP9+GOLIM4_P1P2+P1P2_5229+70816	41
AKAP9+GOLIM4_P1P2+P1P2_5229+70817	23
AKAP9+GOLIM4_P1P2+P1P2_5229+70818	25
AKAP9+GOLIM4_P1P2+P1P2_5230+70816	30
AKAP9+GOLIM4_P1P2+P1P2_5230+70817	14
AKAP9+GOLIM4_P1P2+P1P2_5230+70818	6
AKAP9+HNRNPK_P1P2+P1P2_5225+78784	19
AKAP9+HNRNPK_P1P2+P1P2_5225+78785	12
AKAP9+HNRNPK_P1P2+P1P2_5225+78786	12
AKAP9+HNRNPK_P1P2+P1P2_5229+78785	19
AKAP9+HNRNPK_P1P2+P1P2_5229+78786	7
AKAP9+HNRNPK_P1P2+P1P2_5230+78784	6
AKAP9+HNRNPK_P1P2+P1P2_5230+78785	30
AKAP9+IFFO1_P1+P1P2_5225+81592	34
AKAP9+IFFO1_P1+P1P2_5225+81594	65
AKAP9+IFFO1_P1+P1P2_5225+81595	12
AKAP9+IFFO1_P1+P1P2_5229+81592	12
AKAP9+IFFO1_P1+P1P2_5229+81594	36
AKAP9+IFFO1_P1+P1P2_5229+81595	4
AKAP9+IFFO1_P1+P1P2_5230+81592	28
AKAP9+IFFO1_P1+P1P2_5230+81594	9
AKAP9+IFFO1_P1+P1P2_5230+81595	3
AKAP9+KDM1A_P1P2+P1P2_5225+88511	7
AKAP9+KDM1A_P1P2+P1P2_5225+88513	7
AKAP9+KDM1A_P1P2+P1P2_5225+88515	22
AKAP9+KDM1A_P1P2+P1P2_5229+88511	15
AKAP9+KDM1A_P1P2+P1P2_5229+88513	14
AKAP9+KDM1A_P1P2+P1P2_5229+88515	33
AKAP9+KDM1A_P1P2+P1P2_5230+88513	3
AKAP9+KDM1A_P1P2+P1P2_5230+88515	7
AKAP9+MGAT5_P1P2+P1P2_105113+5225	37
AKAP9+MGAT5_P1P2+P1P2_105113+5229	5
AKAP9+MGAT5_P1P2+P1P2_105113+5230	11
AKAP9+MGAT5_P1P2+P1P2_105114+5225	64
AKAP9+MGAT5_P1P2+P1P2_105114+5229	51
AKAP9+MGAT5_P1P2+P1P2_105114+5230	33
AKAP9+MGAT5_P1P2+P1P2_105119+5225	13
AKAP9+MGAT5_P1P2+P1P2_105119+5229	13
AKAP9+MGAT5_P1P2+P1P2_105119+5230	4
AKAP9+MRPL51_P1P2+P1P2_108171+5225	34
AKAP9+MRPL51_P1P2+P1P2_108171+5229	10
AKAP9+MRPL51_P1P2+P1P2_108171+5230	67
AKAP9+MRPL51_P1P2+P1P2_108173+5225	16
AKAP9+MRPL51_P1P2+P1P2_108173+5230	28
AKAP9+MRPL51_P1P2+P1P2_108180+5225	47
AKAP9+MRPL51_P1P2+P1P2_108180+5229	12
AKAP9+MRPL51_P1P2+P1P2_108180+5230	13
AKAP9+MRPL54_P1P2+P1P2_108201+5225	6
AKAP9+MRPL54_P1P2+P1P2_108201+5229	32
AKAP9+MRPL54_P1P2+P1P2_108201+5230	10
AKAP9+MRPL54_P1P2+P1P2_108202+5225	50
AKAP9+MRPL54_P1P2+P1P2_108202+5229	11
AKAP9+MRPL54_P1P2+P1P2_108202+5230	10
AKAP9+MRPL54_P1P2+P1P2_108203+5225	12
AKAP9+MRPL54_P1P2+P1P2_108203+5229	27
AKAP9+MRPL54_P1P2+P1P2_108203+5230	9
AKAP9+MYBL2_P1P2+P1P2_110503+5225	3
AKAP9+MYBL2_P1P2+P1P2_110503+5230	2
AKAP9+MYBL2_P1P2+P1P2_110504+5225	5
AKAP9+MYBL2_P1P2+P1P2_110504+5229	7
AKAP9+MYBL2_P1P2+P1P2_110504+5230	5
AKAP9+MYBL2_P1P2+P1P2_110508+5225	11
AKAP9+MYBL2_P1P2+P1P2_110508+5229	10
AKAP9+MYBL2_P1P2+P1P2_110508+5230	1
AKAP9+NAA25_P1P2+P1P2_111815+5229	3
AKAP9+NAA25_P1P2+P1P2_111815+5230	1
AKAP9+NAA25_P1P2+P1P2_111818+5225	29
AKAP9+NAA25_P1P2+P1P2_111818+5229	2
AKAP9+NAA25_P1P2+P1P2_111818+5230	26
AKAP9+NAA25_P1P2+P1P2_111819+5229	1
AKAP9+NAA25_P1P2+P1P2_111819+5230	5
AKAP9+PPP1R8_P1P2+P1P2_137244+5225	33
AKAP9+PPP1R8_P1P2+P1P2_137244+5229	51
AKAP9+PPP1R8_P1P2+P1P2_137244+5230	18
AKAP9+PPP1R8_P1P2+P1P2_137245+5225	10
AKAP9+PPP1R8_P1P2+P1P2_137245+5229	24
AKAP9+PPP1R8_P1P2+P1P2_137245+5230	11
AKAP9+PPP1R8_P1P2+P1P2_137246+5225	50
AKAP9+PPP1R8_P1P2+P1P2_137246+5229	31
AKAP9+PPP1R8_P1P2+P1P2_137246+5230	109
AKAP9+PRPF39_P1P2+P1P2_139311+5225	57
AKAP9+PRPF39_P1P2+P1P2_139311+5229	3
AKAP9+PRPF39_P1P2+P1P2_139311+5230	11
AKAP9+PRPF39_P1P2+P1P2_139314+5225	18
AKAP9+PRPF39_P1P2+P1P2_139314+5229	18
AKAP9+PRPF39_P1P2+P1P2_139314+5230	27
AKAP9+PRPF39_P1P2+P1P2_139317+5225	19
AKAP9+PRPF39_P1P2+P1P2_139317+5229	56
AKAP9+PRPF39_P1P2+P1P2_139317+5230	22
AKAP9+PSMA7_P1P2+P1P2_140543+5225	4
AKAP9+PSMA7_P1P2+P1P2_140543+5229	18
AKAP9+PSMA7_P1P2+P1P2_140543+5230	12
AKAP9+PSMA7_P1P2+P1P2_140545+5225	11
AKAP9+PSMA7_P1P2+P1P2_140545+5229	3
AKAP9+PSMA7_P1P2+P1P2_140545+5230	3
AKAP9+PSMA7_P1P2+P1P2_140550+5225	15
AKAP9+PSMA7_P1P2+P1P2_140550+5229	1
AKAP9+PSMA7_P1P2+P1P2_140550+5230	4
AKAP9+PSMB6_P1+P1P2_140631+5225	2
AKAP9+PSMB6_P1+P1P2_140631+5229	6
AKAP9+PSMB6_P1+P1P2_140632+5225	3
AKAP9+PSMB6_P1+P1P2_140632+5229	2
AKAP9+PSMB6_P1+P1P2_140633+5225	3
AKAP9+PSMB6_P1+P1P2_140633+5229	9
AKAP9+PSMB6_P1+P1P2_140633+5230	7
AKAP9+PSMC1_P1P2+P1P2_140694+5225	1
AKAP9+PSMC1_P1P2+P1P2_140694+5229	10
AKAP9+PSMC1_P1P2+P1P2_140694+5230	42
AKAP9+PSMC1_P1P2+P1P2_140698+5225	7
AKAP9+PSMC1_P1P2+P1P2_140698+5229	50
AKAP9+PSMC1_P1P2+P1P2_140698+5230	5
AKAP9+PSMC1_P1P2+P1P2_140699+5225	12
AKAP9+PSMC1_P1P2+P1P2_140699+5229	17
AKAP9+PSMC1_P1P2+P1P2_140699+5230	4
AKAP9+PSMC6_P1P2+P1P2_140752+5229	6
AKAP9+PSMC6_P1P2+P1P2_140752+5230	11
AKAP9+PSMC6_P1P2+P1P2_140754+5225	1
AKAP9+PSMC6_P1P2+P1P2_140754+5229	8
AKAP9+PSMC6_P1P2+P1P2_140754+5230	2
AKAP9+PSMC6_P1P2+P1P2_140756+5225	4
AKAP9+PSMC6_P1P2+P1P2_140756+5229	2
AKAP9+PSMD11_P1P2+P1P2_140781+5225	2
AKAP9+PSMD11_P1P2+P1P2_140781+5229	31
AKAP9+PSMD11_P1P2+P1P2_140781+5230	10
AKAP9+PSMD11_P1P2+P1P2_140782+5225	1
AKAP9+PSMD11_P1P2+P1P2_140782+5229	27
AKAP9+PSMD11_P1P2+P1P2_140782+5230	2
AKAP9+PSMD11_P1P2+P1P2_140783+5225	1
AKAP9+PSMD11_P1P2+P1P2_140783+5229	2
AKAP9+PSMD1_P1P2+P1P2_140762+5225	4
AKAP9+PSMD1_P1P2+P1P2_140762+5229	41
AKAP9+PSMD1_P1P2+P1P2_140762+5230	1
AKAP9+PSMD1_P1P2+P1P2_140765+5225	86
AKAP9+PSMD1_P1P2+P1P2_140765+5229	12
AKAP9+PSMD1_P1P2+P1P2_140765+5230	27
AKAP9+PSMD1_P1P2+P1P2_140766+5225	68
AKAP9+PSMD1_P1P2+P1P2_140766+5229	7
AKAP9+PSMD1_P1P2+P1P2_140766+5230	18
AKAP9+PSMD2_P1P2+P1P2_140827+5225	19
AKAP9+PSMD2_P1P2+P1P2_140827+5229	1
AKAP9+PSMD2_P1P2+P1P2_140827+5230	1
AKAP9+PSMD2_P1P2+P1P2_140829+5225	30
AKAP9+PSMD2_P1P2+P1P2_140829+5229	19
AKAP9+PSMD2_P1P2+P1P2_140829+5230	17
AKAP9+PSMD2_P1P2+P1P2_140830+5225	14
AKAP9+PSMD2_P1P2+P1P2_140830+5229	9
AKAP9+PSMD2_P1P2+P1P2_140830+5230	8
AKAP9+PSMD3_P1P2+P1P2_140835+5225	2
AKAP9+PSMD3_P1P2+P1P2_140835+5229	12
AKAP9+PSMD3_P1P2+P1P2_140835+5230	1
AKAP9+PSMD3_P1P2+P1P2_140836+5225	6
AKAP9+PSMD3_P1P2+P1P2_140836+5229	28
AKAP9+PSMD3_P1P2+P1P2_140836+5230	11
AKAP9+PSMD3_P1P2+P1P2_140837+5225	7
AKAP9+PSMD3_P1P2+P1P2_140837+5230	2
AKAP9+PTPN1_P1P2+P1P2_141802+5225	21
AKAP9+PTPN1_P1P2+P1P2_141802+5229	24
AKAP9+PTPN1_P1P2+P1P2_141802+5230	18
AKAP9+PTPN1_P1P2+P1P2_141809+5225	4
AKAP9+PTPN1_P1P2+P1P2_141809+5229	31
AKAP9+PTPN1_P1P2+P1P2_141809+5230	5
AKAP9+PTPN1_P1P2+P1P2_141810+5225	10
AKAP9+PTPN1_P1P2+P1P2_141810+5229	7
AKAP9+PTPN1_P1P2+P1P2_141810+5230	41
AKAP9+RAB14_P1P2+P1P2_143241+5225	77
AKAP9+RAB14_P1P2+P1P2_143241+5229	128
AKAP9+RAB14_P1P2+P1P2_143241+5230	23
AKAP9+RAB14_P1P2+P1P2_143243+5225	111
AKAP9+RAB14_P1P2+P1P2_143243+5229	123
AKAP9+RAB14_P1P2+P1P2_143243+5230	94
AKAP9+RAB14_P1P2+P1P2_143246+5225	305
AKAP9+RAB14_P1P2+P1P2_143246+5229	212
AKAP9+RAB14_P1P2+P1P2_143246+5230	145
AKAP9+RAD21_P1P2+P1P2_144081+5225	29
AKAP9+RAD21_P1P2+P1P2_144081+5229	6
AKAP9+RAD21_P1P2+P1P2_144081+5230	20
AKAP9+RAD21_P1P2+P1P2_144082+5225	10
AKAP9+RAD21_P1P2+P1P2_144082+5229	5
AKAP9+RAD21_P1P2+P1P2_144082+5230	2
AKAP9+RAD21_P1P2+P1P2_144087+5225	2
AKAP9+RAD21_P1P2+P1P2_144087+5229	9
AKAP9+RAD21_P1P2+P1P2_144087+5230	45
AKAP9+RPL35A_P1P2+P1P2_150911+5225	31
AKAP9+RPL35A_P1P2+P1P2_150911+5229	8
AKAP9+RPL35A_P1P2+P1P2_150911+5230	7
AKAP9+RPL35A_P1P2+P1P2_150913+5225	19
AKAP9+RPL35A_P1P2+P1P2_150913+5229	16
AKAP9+RPL35A_P1P2+P1P2_150913+5230	14
AKAP9+RPL35A_P1P2+P1P2_150919+5225	1
AKAP9+RPL35A_P1P2+P1P2_150919+5229	2
AKAP9+RPL35A_P1P2+P1P2_150919+5230	1
AKAP9+RPL35_P1P2+P1P2_150904+5225	42
AKAP9+RPL35_P1P2+P1P2_150904+5229	27
AKAP9+RPL35_P1P2+P1P2_150904+5230	101
AKAP9+RPL35_P1P2+P1P2_150905+5225	14
AKAP9+RPL35_P1P2+P1P2_150905+5229	16
AKAP9+RPL35_P1P2+P1P2_150905+5230	12
AKAP9+RPL35_P1P2+P1P2_150909+5225	17
AKAP9+RPL35_P1P2+P1P2_150909+5229	22
AKAP9+RPL35_P1P2+P1P2_150909+5230	6
AKAP9+RPL4_P1P2+P1P2_151021+5225	11
AKAP9+RPL4_P1P2+P1P2_151021+5229	7
AKAP9+RPL4_P1P2+P1P2_151025+5225	2
AKAP9+RPL4_P1P2+P1P2_151025+5230	27
AKAP9+RPL4_P1P2+P1P2_151030+5225	3
AKAP9+RPL4_P1P2+P1P2_151030+5229	2
AKAP9+RPL4_P1P2+P1P2_151030+5230	11
AKAP9+RPL7L1_P1P2+P1P2_151088+5225	9
AKAP9+RPL7L1_P1P2+P1P2_151088+5229	27
AKAP9+RPL7L1_P1P2+P1P2_151088+5230	13
AKAP9+RPL7L1_P1P2+P1P2_151089+5225	2
AKAP9+RPL7L1_P1P2+P1P2_151089+5229	3
AKAP9+RPL7L1_P1P2+P1P2_151089+5230	6
AKAP9+RPL7L1_P1P2+P1P2_151090+5230	1
AKAP9+RPS6_P1P2+P1P2_151619+5225	4
AKAP9+RPS6_P1P2+P1P2_151619+5229	36
AKAP9+RPS6_P1P2+P1P2_151620+5225	5
AKAP9+RPS6_P1P2+P1P2_151620+5229	1
AKAP9+RPS6_P1P2+P1P2_151620+5230	4
AKAP9+RRM1_P1P2+P1P2_151953+5225	4
AKAP9+RRM1_P1P2+P1P2_151953+5229	1
AKAP9+RRM1_P1P2+P1P2_151953+5230	4
AKAP9+RRM1_P1P2+P1P2_151954+5225	12
AKAP9+RRM1_P1P2+P1P2_151954+5229	31
AKAP9+RRM1_P1P2+P1P2_151954+5230	3
AKAP9+RRM1_P1P2+P1P2_151959+5225	10
AKAP9+RRM1_P1P2+P1P2_151959+5229	1
AKAP9+RRM1_P1P2+P1P2_151959+5230	4
AKAP9+RRS1_P1P2+P1P2_152084+5225	8
AKAP9+RRS1_P1P2+P1P2_152084+5229	5
AKAP9+RRS1_P1P2+P1P2_152084+5230	14
AKAP9+RRS1_P1P2+P1P2_152086+5229	5
AKAP9+RRS1_P1P2+P1P2_152086+5230	7
AKAP9+RRS1_P1P2+P1P2_152090+5225	4
AKAP9+RRS1_P1P2+P1P2_152090+5229	31
AKAP9+RRS1_P1P2+P1P2_152090+5230	4
AKAP9+RTF1_P1P2+P1P2_152461+5225	5
AKAP9+RTF1_P1P2+P1P2_152461+5229	24
AKAP9+RTF1_P1P2+P1P2_152461+5230	4
AKAP9+RTF1_P1P2+P1P2_152462+5225	11
AKAP9+RTF1_P1P2+P1P2_152462+5229	1
AKAP9+RTF1_P1P2+P1P2_152462+5230	12
AKAP9+RTF1_P1P2+P1P2_152466+5225	7
AKAP9+RTF1_P1P2+P1P2_152466+5229	4
AKAP9+RTF1_P1P2+P1P2_152466+5230	2
AKAP9+SAMM50_P1P2+P1P2_153753+5225	2
AKAP9+SAMM50_P1P2+P1P2_153753+5229	2
AKAP9+SAMM50_P1P2+P1P2_153753+5230	6
AKAP9+SAMM50_P1P2+P1P2_153755+5225	28
AKAP9+SAMM50_P1P2+P1P2_153755+5229	3
AKAP9+SAMM50_P1P2+P1P2_153759+5225	86
AKAP9+SAMM50_P1P2+P1P2_153759+5229	10
AKAP9+SAMM50_P1P2+P1P2_153759+5230	7
AKAP9+SARS_P1P2+P1P2_153918+5225	49
AKAP9+SARS_P1P2+P1P2_153918+5229	87
AKAP9+SARS_P1P2+P1P2_153918+5230	28
AKAP9+SARS_P1P2+P1P2_153919+5225	1
AKAP9+SARS_P1P2+P1P2_153919+5229	2
AKAP9+SARS_P1P2+P1P2_153919+5230	3
AKAP9+SARS_P1P2+P1P2_153920+5225	8
AKAP9+SARS_P1P2+P1P2_153920+5229	1
AKAP9+SARS_P1P2+P1P2_153920+5230	2
AKAP9+SCFD1_P1P2+P1P2_154422+5229	15
AKAP9+SCFD1_P1P2+P1P2_154422+5230	3
AKAP9+SCFD1_P1P2+P1P2_154424+5225	69
AKAP9+SCFD1_P1P2+P1P2_154424+5229	53
AKAP9+SCFD1_P1P2+P1P2_154424+5230	159
AKAP9+SCFD1_P1P2+P1P2_154425+5225	46
AKAP9+SCFD1_P1P2+P1P2_154425+5229	43
AKAP9+SCFD1_P1P2+P1P2_154425+5230	98
AKAP9+SEC22B_P1P2+P1P2_155541+5225	402
AKAP9+SEC22B_P1P2+P1P2_155541+5229	254
AKAP9+SEC22B_P1P2+P1P2_155541+5230	262
AKAP9+SEC22B_P1P2+P1P2_155545+5225	122
AKAP9+SEC22B_P1P2+P1P2_155545+5229	34
AKAP9+SEC22B_P1P2+P1P2_155545+5230	49
AKAP9+SEC22B_P1P2+P1P2_155549+5225	339
AKAP9+SEC22B_P1P2+P1P2_155549+5229	274
AKAP9+SEC22B_P1P2+P1P2_155549+5230	148
AKAP9+SEC23B_P1P2+P1P2_155571+5225	1369
AKAP9+SEC23B_P1P2+P1P2_155571+5229	1162
AKAP9+SEC23B_P1P2+P1P2_155571+5230	857
AKAP9+SEC23B_P1P2+P1P2_155572+5225	1284
AKAP9+SEC23B_P1P2+P1P2_155572+5229	591
AKAP9+SEC23B_P1P2+P1P2_155572+5230	789
AKAP9+SEC23B_P1P2+P1P2_155573+5225	1381
AKAP9+SEC23B_P1P2+P1P2_155573+5229	695
AKAP9+SEC23B_P1P2+P1P2_155573+5230	742
AKAP9+SEC23IP_P1P2+P1P2_155583+5225	311
AKAP9+SEC23IP_P1P2+P1P2_155583+5229	296
AKAP9+SEC23IP_P1P2+P1P2_155583+5230	292
AKAP9+SEC23IP_P1P2+P1P2_155585+5225	511
AKAP9+SEC23IP_P1P2+P1P2_155585+5229	164
AKAP9+SEC23IP_P1P2+P1P2_155585+5230	417
AKAP9+SEC23IP_P1P2+P1P2_155586+5225	868
AKAP9+SEC23IP_P1P2+P1P2_155586+5229	558
AKAP9+SEC23IP_P1P2+P1P2_155586+5230	723
AKAP9+SEC24A_P1P2+P1P2_155592+5225	440
AKAP9+SEC24A_P1P2+P1P2_155592+5229	125
AKAP9+SEC24A_P1P2+P1P2_155592+5230	235
AKAP9+SEC24A_P1P2+P1P2_155593+5225	271
AKAP9+SEC24A_P1P2+P1P2_155593+5229	103
AKAP9+SEC24A_P1P2+P1P2_155593+5230	87
AKAP9+SEC24A_P1P2+P1P2_155595+5225	269
AKAP9+SEC24A_P1P2+P1P2_155595+5229	159
AKAP9+SEC24A_P1P2+P1P2_155595+5230	205
AKAP9+SEC24B_P1P2+P1P2_155604+5225	94
AKAP9+SEC24B_P1P2+P1P2_155604+5229	197
AKAP9+SEC24B_P1P2+P1P2_155604+5230	102
AKAP9+SEC24B_P1P2+P1P2_155605+5225	69
AKAP9+SEC24B_P1P2+P1P2_155605+5229	78
AKAP9+SEC24B_P1P2+P1P2_155605+5230	34
AKAP9+SEC24B_P1P2+P1P2_155608+5225	191
AKAP9+SEC24B_P1P2+P1P2_155608+5229	128
AKAP9+SEC24B_P1P2+P1P2_155608+5230	176
AKAP9+SEC24C_P1P2+P1P2_155612+5225	1722
AKAP9+SEC24C_P1P2+P1P2_155612+5229	792
AKAP9+SEC24C_P1P2+P1P2_155612+5230	861
AKAP9+SEC24C_P1P2+P1P2_155613+5225	1275
AKAP9+SEC24C_P1P2+P1P2_155613+5229	550
AKAP9+SEC24C_P1P2+P1P2_155613+5230	962
AKAP9+SEC24C_P1P2+P1P2_155617+5225	1730
AKAP9+SEC24C_P1P2+P1P2_155617+5229	785
AKAP9+SEC24C_P1P2+P1P2_155617+5230	1121
AKAP9+SF3A1_P1+P1P2_157342+5229	3
AKAP9+SF3A1_P1+P1P2_157342+5230	2
AKAP9+SF3A1_P1+P1P2_157347+5225	38
AKAP9+SF3A1_P1+P1P2_157347+5229	10
AKAP9+SF3A1_P1+P1P2_157347+5230	7
AKAP9+SF3B2_P1P2+P1P2_157412+5225	1
AKAP9+SF3B2_P1P2+P1P2_157412+5229	23
AKAP9+SF3B2_P1P2+P1P2_157412+5230	2
AKAP9+SF3B2_P1P2+P1P2_157417+5225	4
AKAP9+SF3B2_P1P2+P1P2_157417+5229	11
AKAP9+SF3B2_P1P2+P1P2_157417+5230	12
AKAP9+SF3B2_P1P2+P1P2_157420+5225	13
AKAP9+SF3B2_P1P2+P1P2_157420+5230	46
AKAP9+SGTA_P1P2+P1P2_158011+5225	119
AKAP9+SGTA_P1P2+P1P2_158011+5229	53
AKAP9+SGTA_P1P2+P1P2_158011+5230	55
AKAP9+SGTA_P1P2+P1P2_158013+5225	60
AKAP9+SGTA_P1P2+P1P2_158013+5229	76
AKAP9+SGTA_P1P2+P1P2_158013+5230	63
AKAP9+SGTA_P1P2+P1P2_158019+5225	50
AKAP9+SGTA_P1P2+P1P2_158019+5229	67
AKAP9+SGTA_P1P2+P1P2_158019+5230	79
AKAP9+SMC3_P1P2+P1P2_164524+5225	17
AKAP9+SMC3_P1P2+P1P2_164524+5229	5
AKAP9+SMC3_P1P2+P1P2_164524+5230	11
AKAP9+SMC3_P1P2+P1P2_164528+5225	12
AKAP9+SMC3_P1P2+P1P2_164528+5229	8
AKAP9+SMC3_P1P2+P1P2_164528+5230	7
AKAP9+SMC3_P1P2+P1P2_164530+5229	3
AKAP9+SMC3_P1P2+P1P2_164530+5230	2
AKAP9+SNRPD3_P1P2+P1P2_165672+5225	19
AKAP9+SNRPD3_P1P2+P1P2_165672+5229	6
AKAP9+SNRPD3_P1P2+P1P2_165672+5230	12
AKAP9+SNRPD3_P1P2+P1P2_165675+5225	1
AKAP9+SNRPD3_P1P2+P1P2_165677+5229	15
AKAP9+SNRPD3_P1P2+P1P2_165677+5230	8
AKAP9+SON_P1+P1P2_166333+5225	3
AKAP9+SON_P1+P1P2_166333+5230	2
AKAP9+SON_P1+P1P2_166335+5225	2
AKAP9+SON_P1+P1P2_166335+5229	1
AKAP9+SON_P1+P1P2_166335+5230	1
AKAP9+SON_P1+P1P2_166338+5225	19
AKAP9+SON_P1+P1P2_166338+5229	19
AKAP9+SPATA5L1_P1P2+P1P2_167432+5225	1
AKAP9+SPATA5L1_P1P2+P1P2_167432+5229	12
AKAP9+SPATA5L1_P1P2+P1P2_167432+5230	2
AKAP9+SPATA5L1_P1P2+P1P2_167433+5225	107
AKAP9+SPATA5L1_P1P2+P1P2_167433+5229	28
AKAP9+SPATA5L1_P1P2+P1P2_167433+5230	71
AKAP9+SPATA5L1_P1P2+P1P2_167437+5225	27
AKAP9+SPATA5L1_P1P2+P1P2_167437+5229	3
AKAP9+SPATA5L1_P1P2+P1P2_167437+5230	3
AKAP9+SPCS3_P1+P1P2_167592+5225	20
AKAP9+SPCS3_P1+P1P2_167592+5229	33
AKAP9+SPCS3_P1+P1P2_167592+5230	11
AKAP9+SPCS3_P1+P1P2_167595+5225	560
AKAP9+SPCS3_P1+P1P2_167595+5229	561
AKAP9+SPCS3_P1+P1P2_167595+5230	281
AKAP9+SPCS3_P1+P1P2_167598+5225	200
AKAP9+SPCS3_P1+P1P2_167598+5229	199
AKAP9+SPCS3_P1+P1P2_167598+5230	314
AKAP9+SPPL3_P1P2+P1P2_168364+5225	497
AKAP9+SPPL3_P1P2+P1P2_168364+5229	547
AKAP9+SPPL3_P1P2+P1P2_168364+5230	372
AKAP9+SPPL3_P1P2+P1P2_168365+5225	166
AKAP9+SPPL3_P1P2+P1P2_168365+5229	180
AKAP9+SPPL3_P1P2+P1P2_168365+5230	170
AKAP9+SPPL3_P1P2+P1P2_168368+5225	510
AKAP9+SPPL3_P1P2+P1P2_168368+5229	224
AKAP9+SPPL3_P1P2+P1P2_168368+5230	379
AKAP9+SRP54_P1P2+P1P2_169152+5225	149
AKAP9+SRP54_P1P2+P1P2_169152+5229	104
AKAP9+SRP54_P1P2+P1P2_169152+5230	152
AKAP9+SRP54_P1P2+P1P2_169154+5225	149
AKAP9+SRP54_P1P2+P1P2_169154+5229	34
AKAP9+SRP54_P1P2+P1P2_169154+5230	32
AKAP9+SRP54_P1P2+P1P2_169157+5225	59
AKAP9+SRP54_P1P2+P1P2_169157+5229	43
AKAP9+SRP54_P1P2+P1P2_169157+5230	39
AKAP9+SRPRB_P1P2+P1P2_169241+5225	22
AKAP9+SRPRB_P1P2+P1P2_169241+5229	31
AKAP9+SRPRB_P1P2+P1P2_169241+5230	11
AKAP9+SRPRB_P1P2+P1P2_169242+5225	3
AKAP9+SRPRB_P1P2+P1P2_169242+5229	20
AKAP9+SRPRB_P1P2+P1P2_169242+5230	9
AKAP9+SRPRB_P1P2+P1P2_169243+5225	41
AKAP9+SRPRB_P1P2+P1P2_169243+5229	42
AKAP9+SRPRB_P1P2+P1P2_169243+5230	35
AKAP9+ST3GAL4_P1P2+P1P2_169993+5225	11
AKAP9+ST3GAL4_P1P2+P1P2_169993+5229	38
AKAP9+ST3GAL4_P1P2+P1P2_169993+5230	15
AKAP9+ST3GAL4_P1P2+P1P2_169997+5225	24
AKAP9+ST3GAL4_P1P2+P1P2_169997+5229	41
AKAP9+ST3GAL4_P1P2+P1P2_169997+5230	20
AKAP9+ST3GAL4_P1P2+P1P2_169998+5225	16
AKAP9+ST3GAL4_P1P2+P1P2_169998+5229	5
AKAP9+ST3GAL4_P1P2+P1P2_169998+5230	18
AKAP9+STX5_P1P2+P1P2_171421+5225	434
AKAP9+STX5_P1P2+P1P2_171421+5229	165
AKAP9+STX5_P1P2+P1P2_171421+5230	127
AKAP9+STX5_P1P2+P1P2_171422+5225	19
AKAP9+STX5_P1P2+P1P2_171422+5229	28
AKAP9+STX5_P1P2+P1P2_171422+5230	21
AKAP9+STX5_P1P2+P1P2_171423+5225	181
AKAP9+STX5_P1P2+P1P2_171423+5229	20
AKAP9+STX5_P1P2+P1P2_171423+5230	65
AKAP9+SUCO_P1P2+P1P2_171621+5225	391
AKAP9+SUCO_P1P2+P1P2_171621+5229	213
AKAP9+SUCO_P1P2+P1P2_171621+5230	350
AKAP9+SUCO_P1P2+P1P2_171622+5225	678
AKAP9+SUCO_P1P2+P1P2_171622+5229	476
AKAP9+SUCO_P1P2+P1P2_171622+5230	360
AKAP9+SUCO_P1P2+P1P2_171625+5225	760
AKAP9+SUCO_P1P2+P1P2_171625+5229	294
AKAP9+SUCO_P1P2+P1P2_171625+5230	360
AKAP9+THOC5_P1P2+P1P2_177821+5225	70
AKAP9+THOC5_P1P2+P1P2_177821+5229	2
AKAP9+THOC5_P1P2+P1P2_177821+5230	3
AKAP9+THOC5_P1P2+P1P2_177828+5225	131
AKAP9+THOC5_P1P2+P1P2_177828+5229	12
AKAP9+THOC5_P1P2+P1P2_177828+5230	59
AKAP9+THOC5_P1P2+P1P2_177829+5225	7
AKAP9+THOC5_P1P2+P1P2_177829+5229	36
AKAP9+THOC5_P1P2+P1P2_177829+5230	8
AKAP9+TMED10_P1P2+P1P2_179412+5225	53
AKAP9+TMED10_P1P2+P1P2_179412+5229	27
AKAP9+TMED10_P1P2+P1P2_179412+5230	48
AKAP9+TMED10_P1P2+P1P2_179413+5225	53
AKAP9+TMED10_P1P2+P1P2_179413+5229	75
AKAP9+TMED10_P1P2+P1P2_179413+5230	38
AKAP9+TMED10_P1P2+P1P2_179415+5225	58
AKAP9+TMED10_P1P2+P1P2_179415+5229	15
AKAP9+TMED10_P1P2+P1P2_179415+5230	60
AKAP9+TMED2_P1P2+P1P2_179423+5225	40
AKAP9+TMED2_P1P2+P1P2_179423+5229	68
AKAP9+TMED2_P1P2+P1P2_179423+5230	30
AKAP9+TMED2_P1P2+P1P2_179424+5225	112
AKAP9+TMED2_P1P2+P1P2_179424+5229	68
AKAP9+TMED2_P1P2+P1P2_179424+5230	115
AKAP9+TMED2_P1P2+P1P2_179425+5225	136
AKAP9+TMED2_P1P2+P1P2_179425+5229	94
AKAP9+TMED2_P1P2+P1P2_179425+5230	51
AKAP9+TRAPPC11_P1P2+P1P2_184843+5225	50
AKAP9+TRAPPC11_P1P2+P1P2_184843+5229	24
AKAP9+TRAPPC11_P1P2+P1P2_184843+5230	45
AKAP9+TRAPPC11_P1P2+P1P2_184845+5225	624
AKAP9+TRAPPC11_P1P2+P1P2_184845+5229	418
AKAP9+TRAPPC11_P1P2+P1P2_184845+5230	451
AKAP9+TRAPPC11_P1P2+P1P2_184850+5225	226
AKAP9+TRAPPC11_P1P2+P1P2_184850+5229	274
AKAP9+TRAPPC11_P1P2+P1P2_184850+5230	220
AKAP9+TRAPPC3_P1P2+P1P2_184891+5225	980
AKAP9+TRAPPC3_P1P2+P1P2_184891+5229	626
AKAP9+TRAPPC3_P1P2+P1P2_184891+5230	438
AKAP9+TRAPPC3_P1P2+P1P2_184892+5225	896
AKAP9+TRAPPC3_P1P2+P1P2_184892+5229	792
AKAP9+TRAPPC3_P1P2+P1P2_184892+5230	591
AKAP9+TRAPPC3_P1P2+P1P2_184898+5225	633
AKAP9+TRAPPC3_P1P2+P1P2_184898+5229	641
AKAP9+TRAPPC3_P1P2+P1P2_184898+5230	580
AKAP9+TRAPPC5_P1P2+P1P2_184921+5225	26
[truncated: 39,734 more rows]

## Sheet: Untreated rep 1
0Safe+0Safe_safe+safe_204603.4554+204603.4554	435
0Safe+0Safe_safe+safe_204603.4554+204750.4701	1134
0Safe+0Safe_safe+safe_204603.4554+204798.4749	1167
0Safe+0Safe_safe+safe_204603.4554+204895.4846	1027
0Safe+0Safe_safe+safe_204603.4554+205190.5141	1138
0Safe+0Safe_safe+safe_204603.4554+205244.5195	969
0Safe+0Safe_safe+safe_204603.4554+205896.5847	1091
0Safe+0Safe_safe+safe_204603.4554+205926.5877	1282
0Safe+0Safe_safe+safe_204603.4554+206014.5965	1009
0Safe+0Safe_safe+safe_204603.4554+206141.1592	1457
0Safe+0Safe_safe+safe_204603.4554+206175.1626	1272
0Safe+0Safe_safe+safe_204603.4554+206180.1631	1374
0Safe+0Safe_safe+safe_204603.4554+206276.1727	837
0Safe+0Safe_safe+safe_204603.4554+207086.1286	1242
0Safe+0Safe_safe+safe_204603.4554+207133.1333	1221
0Safe+0Safe_safe+safe_204603.4554+207268.1468	871
0Safe+0Safe_safe+safe_204603.4554+207272.1472	1319
0Safe+0Safe_safe+safe_204603.4554+207295.1495	1287
0Safe+0Safe_safe+safe_204603.4554+207412.862	1209
0Safe+0Safe_safe+safe_204603.4554+207644.2345	1459
0Safe+0Safe_safe+safe_204603.4554+207736.2437	1238
0Safe+0Safe_safe+safe_204603.4554+207762.2463	927
0Safe+0Safe_safe+safe_204603.4554+207933.2634	1194
0Safe+0Safe_safe+safe_204603.4554+208027.2728	953
0Safe+0Safe_safe+safe_204603.4554+208233.2934	1210
0Safe+0Safe_safe+safe_204603.4554+208249.2950	1250
0Safe+0Safe_safe+safe_204603.4554+208251.2952	1374
0Safe+0Safe_safe+safe_204603.4554+208266.2967	1101
0Safe+0Safe_safe+safe_204603.4554+208280.2981	1529
0Safe+0Safe_safe+safe_204603.4554+208288.2989	1238
0Safe+0Safe_safe+safe_204603.4554+208334.13	1100
0Safe+0Safe_safe+safe_204603.4554+208691.451	1214
0Safe+0Safe_safe+safe_204603.4554+208974.706	1300
0Safe+0Safe_safe+safe_204603.4554+209014.742	1017
0Safe+0Safe_safe+safe_204603.4554+209157.3858	1399
0Safe+0Safe_safe+safe_204603.4554+209400.4101	1444
0Safe+0Safe_safe+safe_204603.4554+209597.4298	1223
0Safe+0Safe_safe+safe_204603.4554+209963.3164	1339
0Safe+0Safe_safe+safe_204603.4554+209973.3174	1812
0Safe+0Safe_safe+safe_204603.4554+209990.3191	1184
0Safe+0Safe_safe+safe_204603.4554+210140.3341	1427
0Safe+0Safe_safe+safe_204603.4554+210313.3514	1329
0Safe+0Safe_safe+safe_204603.4554+210540.3741	1455
0Safe+0Safe_safe+safe_204603.4554+210725.6176	1034
0Safe+0Safe_safe+safe_204603.4554+210743.6194	1012
0Safe+0Safe_safe+safe_204603.4554+210809.6260	1030
0Safe+0Safe_safe+safe_204603.4554+210925.6376	784
0Safe+0Safe_safe+safe_204603.4554+210935.6386	1007
0Safe+0Safe_safe+safe_204603.4554+210946.6397	1109
0Safe+0Safe_safe+safe_204603.4554+211135.6586	997
0Safe+0Safe_safe+safe_204750.4701+204750.4701	478
0Safe+0Safe_safe+safe_204750.4701+204798.4749	1274
0Safe+0Safe_safe+safe_204750.4701+204895.4846	796
0Safe+0Safe_safe+safe_204750.4701+205190.5141	1332
0Safe+0Safe_safe+safe_204750.4701+205244.5195	997
0Safe+0Safe_safe+safe_204750.4701+205896.5847	1098
0Safe+0Safe_safe+safe_204750.4701+205926.5877	1091
0Safe+0Safe_safe+safe_204750.4701+206014.5965	1029
0Safe+0Safe_safe+safe_204750.4701+206141.1592	1337
0Safe+0Safe_safe+safe_204750.4701+206175.1626	1162
0Safe+0Safe_safe+safe_204750.4701+206180.1631	1234
0Safe+0Safe_safe+safe_204750.4701+206276.1727	1019
0Safe+0Safe_safe+safe_204750.4701+207086.1286	1328
0Safe+0Safe_safe+safe_204750.4701+207133.1333	1193
0Safe+0Safe_safe+safe_204750.4701+207268.1468	642
0Safe+0Safe_safe+safe_204750.4701+207272.1472	1042
0Safe+0Safe_safe+safe_204750.4701+207295.1495	1602
0Safe+0Safe_safe+safe_204750.4701+207412.862	1252
0Safe+0Safe_safe+safe_204750.4701+207644.2345	1094
0Safe+0Safe_safe+safe_204750.4701+207736.2437	1045
0Safe+0Safe_safe+safe_204750.4701+207762.2463	1236
0Safe+0Safe_safe+safe_204750.4701+207933.2634	1044
0Safe+0Safe_safe+safe_204750.4701+208027.2728	1075
0Safe+0Safe_safe+safe_204750.4701+208233.2934	1094
0Safe+0Safe_safe+safe_204750.4701+208249.2950	1089
0Safe+0Safe_safe+safe_204750.4701+208251.2952	1444
0Safe+0Safe_safe+safe_204750.4701+208266.2967	1444
0Safe+0Safe_safe+safe_204750.4701+208280.2981	1812
0Safe+0Safe_safe+safe_204750.4701+208288.2989	1082
0Safe+0Safe_safe+safe_204750.4701+208334.13	1299
0Safe+0Safe_safe+safe_204750.4701+208691.451	1288
0Safe+0Safe_safe+safe_204750.4701+208974.706	1426
0Safe+0Safe_safe+safe_204750.4701+209014.742	1159
0Safe+0Safe_safe+safe_204750.4701+209157.3858	1653
0Safe+0Safe_safe+safe_204750.4701+209400.4101	1619
0Safe+0Safe_safe+safe_204750.4701+209597.4298	1168
0Safe+0Safe_safe+safe_204750.4701+209963.3164	1226
0Safe+0Safe_safe+safe_204750.4701+209973.3174	1750
0Safe+0Safe_safe+safe_204750.4701+209990.3191	1316
0Safe+0Safe_safe+safe_204750.4701+210140.3341	1298
0Safe+0Safe_safe+safe_204750.4701+210313.3514	1385
0Safe+0Safe_safe+safe_204750.4701+210540.3741	1654
0Safe+0Safe_safe+safe_204750.4701+210725.6176	1180
0Safe+0Safe_safe+safe_204750.4701+210743.6194	1115
0Safe+0Safe_safe+safe_204750.4701+210809.6260	1082
0Safe+0Safe_safe+safe_204750.4701+210925.6376	1023
0Safe+0Safe_safe+safe_204750.4701+210935.6386	920
0Safe+0Safe_safe+safe_204750.4701+210946.6397	1155
0Safe+0Safe_safe+safe_204750.4701+211135.6586	1037
0Safe+0Safe_safe+safe_204798.4749+204798.4749	353
0Safe+0Safe_safe+safe_204798.4749+204895.4846	1030
0Safe+0Safe_safe+safe_204798.4749+205190.5141	1214
0Safe+0Safe_safe+safe_204798.4749+205244.5195	1157
0Safe+0Safe_safe+safe_204798.4749+205896.5847	1027
0Safe+0Safe_safe+safe_204798.4749+205926.5877	898
0Safe+0Safe_safe+safe_204798.4749+206014.5965	1206
0Safe+0Safe_safe+safe_204798.4749+206141.1592	1405
0Safe+0Safe_safe+safe_204798.4749+206175.1626	1254
0Safe+0Safe_safe+safe_204798.4749+206180.1631	1159
0Safe+0Safe_safe+safe_204798.4749+206276.1727	1026
0Safe+0Safe_safe+safe_204798.4749+207086.1286	1256
0Safe+0Safe_safe+safe_204798.4749+207133.1333	1254
0Safe+0Safe_safe+safe_204798.4749+207268.1468	792
0Safe+0Safe_safe+safe_204798.4749+207272.1472	842
0Safe+0Safe_safe+safe_204798.4749+207295.1495	1204
0Safe+0Safe_safe+safe_204798.4749+207412.862	1351
0Safe+0Safe_safe+safe_204798.4749+207644.2345	1094
0Safe+0Safe_safe+safe_204798.4749+207736.2437	1458
0Safe+0Safe_safe+safe_204798.4749+207762.2463	1013
0Safe+0Safe_safe+safe_204798.4749+207933.2634	1089
0Safe+0Safe_safe+safe_204798.4749+208027.2728	1072
0Safe+0Safe_safe+safe_204798.4749+208233.2934	1214
0Safe+0Safe_safe+safe_204798.4749+208249.2950	1316
0Safe+0Safe_safe+safe_204798.4749+208251.2952	1341
0Safe+0Safe_safe+safe_204798.4749+208266.2967	1417
0Safe+0Safe_safe+safe_204798.4749+208280.2981	1701
0Safe+0Safe_safe+safe_204798.4749+208288.2989	1304
0Safe+0Safe_safe+safe_204798.4749+208334.13	1355
0Safe+0Safe_safe+safe_204798.4749+208691.451	979
0Safe+0Safe_safe+safe_204798.4749+208974.706	1494
0Safe+0Safe_safe+safe_204798.4749+209014.742	956
0Safe+0Safe_safe+safe_204798.4749+209157.3858	1604
0Safe+0Safe_safe+safe_204798.4749+209400.4101	1488
0Safe+0Safe_safe+safe_204798.4749+209597.4298	843
0Safe+0Safe_safe+safe_204798.4749+209963.3164	990
0Safe+0Safe_safe+safe_204798.4749+209973.3174	1917
0Safe+0Safe_safe+safe_204798.4749+209990.3191	1142
0Safe+0Safe_safe+safe_204798.4749+210140.3341	1372
0Safe+0Safe_safe+safe_204798.4749+210313.3514	1025
0Safe+0Safe_safe+safe_204798.4749+210540.3741	1451
0Safe+0Safe_safe+safe_204798.4749+210725.6176	1332
0Safe+0Safe_safe+safe_204798.4749+210743.6194	1194
0Safe+0Safe_safe+safe_204798.4749+210809.6260	957
0Safe+0Safe_safe+safe_204798.4749+210925.6376	1123
0Safe+0Safe_safe+safe_204798.4749+210935.6386	963
0Safe+0Safe_safe+safe_204798.4749+210946.6397	1424
0Safe+0Safe_safe+safe_204798.4749+211135.6586	1168
0Safe+0Safe_safe+safe_204895.4846+204895.4846	400
0Safe+0Safe_safe+safe_204895.4846+205190.5141	994
0Safe+0Safe_safe+safe_204895.4846+205244.5195	778
0Safe+0Safe_safe+safe_204895.4846+205896.5847	1063
0Safe+0Safe_safe+safe_204895.4846+205926.5877	963
0Safe+0Safe_safe+safe_204895.4846+206014.5965	729
0Safe+0Safe_safe+safe_204895.4846+206141.1592	1274
0Safe+0Safe_safe+safe_204895.4846+206175.1626	948
0Safe+0Safe_safe+safe_204895.4846+206180.1631	948
0Safe+0Safe_safe+safe_204895.4846+206276.1727	905
0Safe+0Safe_safe+safe_204895.4846+207086.1286	1263
0Safe+0Safe_safe+safe_204895.4846+207133.1333	1167
0Safe+0Safe_safe+safe_204895.4846+207268.1468	643
0Safe+0Safe_safe+safe_204895.4846+207272.1472	933
0Safe+0Safe_safe+safe_204895.4846+207295.1495	1111
0Safe+0Safe_safe+safe_204895.4846+207412.862	879
0Safe+0Safe_safe+safe_204895.4846+207644.2345	1037
0Safe+0Safe_safe+safe_204895.4846+207736.2437	1145
0Safe+0Safe_safe+safe_204895.4846+207762.2463	1162
0Safe+0Safe_safe+safe_204895.4846+207933.2634	873
0Safe+0Safe_safe+safe_204895.4846+208027.2728	805
0Safe+0Safe_safe+safe_204895.4846+208233.2934	1197
0Safe+0Safe_safe+safe_204895.4846+208249.2950	939
0Safe+0Safe_safe+safe_204895.4846+208251.2952	1092
0Safe+0Safe_safe+safe_204895.4846+208266.2967	820
0Safe+0Safe_safe+safe_204895.4846+208280.2981	1502
0Safe+0Safe_safe+safe_204895.4846+208288.2989	975
0Safe+0Safe_safe+safe_204895.4846+208334.13	978
0Safe+0Safe_safe+safe_204895.4846+208691.451	884
0Safe+0Safe_safe+safe_204895.4846+208974.706	1254
0Safe+0Safe_safe+safe_204895.4846+209014.742	758
0Safe+0Safe_safe+safe_204895.4846+209157.3858	1160
0Safe+0Safe_safe+safe_204895.4846+209400.4101	1083
0Safe+0Safe_safe+safe_204895.4846+209597.4298	1035
0Safe+0Safe_safe+safe_204895.4846+209963.3164	954
0Safe+0Safe_safe+safe_204895.4846+209973.3174	1369
0Safe+0Safe_safe+safe_204895.4846+209990.3191	875
0Safe+0Safe_safe+safe_204895.4846+210140.3341	1182
0Safe+0Safe_safe+safe_204895.4846+210313.3514	1137
0Safe+0Safe_safe+safe_204895.4846+210540.3741	1084
0Safe+0Safe_safe+safe_204895.4846+210725.6176	790
0Safe+0Safe_safe+safe_204895.4846+210743.6194	795
0Safe+0Safe_safe+safe_204895.4846+210809.6260	1045
0Safe+0Safe_safe+safe_204895.4846+210925.6376	1040
0Safe+0Safe_safe+safe_204895.4846+210935.6386	797
0Safe+0Safe_safe+safe_204895.4846+210946.6397	876
0Safe+0Safe_safe+safe_204895.4846+211135.6586	942
0Safe+0Safe_safe+safe_205190.5141+205190.5141	395
0Safe+0Safe_safe+safe_205190.5141+205244.5195	862
0Safe+0Safe_safe+safe_205190.5141+205896.5847	1121
0Safe+0Safe_safe+safe_205190.5141+205926.5877	1025
0Safe+0Safe_safe+safe_205190.5141+206014.5965	1072
0Safe+0Safe_safe+safe_205190.5141+206141.1592	1001
0Safe+0Safe_safe+safe_205190.5141+206175.1626	1041
0Safe+0Safe_safe+safe_205190.5141+206180.1631	1339
0Safe+0Safe_safe+safe_205190.5141+206276.1727	758
0Safe+0Safe_safe+safe_205190.5141+207086.1286	1091
0Safe+0Safe_safe+safe_205190.5141+207133.1333	1375
0Safe+0Safe_safe+safe_205190.5141+207268.1468	758
0Safe+0Safe_safe+safe_205190.5141+207272.1472	1128
0Safe+0Safe_safe+safe_205190.5141+207295.1495	1139
0Safe+0Safe_safe+safe_205190.5141+207412.862	1043
0Safe+0Safe_safe+safe_205190.5141+207644.2345	1237
0Safe+0Safe_safe+safe_205190.5141+207736.2437	1286
0Safe+0Safe_safe+safe_205190.5141+207762.2463	928
0Safe+0Safe_safe+safe_205190.5141+207933.2634	1093
0Safe+0Safe_safe+safe_205190.5141+208027.2728	1052
0Safe+0Safe_safe+safe_205190.5141+208233.2934	1271
0Safe+0Safe_safe+safe_205190.5141+208249.2950	1087
0Safe+0Safe_safe+safe_205190.5141+208251.2952	1263
0Safe+0Safe_safe+safe_205190.5141+208266.2967	1091
0Safe+0Safe_safe+safe_205190.5141+208280.2981	1644
0Safe+0Safe_safe+safe_205190.5141+208288.2989	1138
0Safe+0Safe_safe+safe_205190.5141+208334.13	1042
0Safe+0Safe_safe+safe_205190.5141+208691.451	1132
0Safe+0Safe_safe+safe_205190.5141+208974.706	1348
0Safe+0Safe_safe+safe_205190.5141+209014.742	1090
0Safe+0Safe_safe+safe_205190.5141+209157.3858	1572
0Safe+0Safe_safe+safe_205190.5141+209400.4101	1416
0Safe+0Safe_safe+safe_205190.5141+209597.4298	847
0Safe+0Safe_safe+safe_205190.5141+209963.3164	1079
0Safe+0Safe_safe+safe_205190.5141+209973.3174	1373
0Safe+0Safe_safe+safe_205190.5141+209990.3191	1038
0Safe+0Safe_safe+safe_205190.5141+210140.3341	1168
0Safe+0Safe_safe+safe_205190.5141+210313.3514	935
0Safe+0Safe_safe+safe_205190.5141+210540.3741	1309
0Safe+0Safe_safe+safe_205190.5141+210725.6176	981
0Safe+0Safe_safe+safe_205190.5141+210743.6194	844
0Safe+0Safe_safe+safe_205190.5141+210809.6260	1035
0Safe+0Safe_safe+safe_205190.5141+210925.6376	995
0Safe+0Safe_safe+safe_205190.5141+210935.6386	1086
0Safe+0Safe_safe+safe_205190.5141+210946.6397	965
0Safe+0Safe_safe+safe_205190.5141+211135.6586	858
0Safe+0Safe_safe+safe_205244.5195+205244.5195	380
0Safe+0Safe_safe+safe_205244.5195+205896.5847	1101
0Safe+0Safe_safe+safe_205244.5195+205926.5877	1262
0Safe+0Safe_safe+safe_205244.5195+206014.5965	1114
0Safe+0Safe_safe+safe_205244.5195+206141.1592	1142
0Safe+0Safe_safe+safe_205244.5195+206175.1626	971
0Safe+0Safe_safe+safe_205244.5195+206180.1631	1378
0Safe+0Safe_safe+safe_205244.5195+206276.1727	918
0Safe+0Safe_safe+safe_205244.5195+207086.1286	1150
0Safe+0Safe_safe+safe_205244.5195+207133.1333	1484
0Safe+0Safe_safe+safe_205244.5195+207268.1468	760
0Safe+0Safe_safe+safe_205244.5195+207272.1472	1087
0Safe+0Safe_safe+safe_205244.5195+207295.1495	1422
0Safe+0Safe_safe+safe_205244.5195+207412.862	1179
0Safe+0Safe_safe+safe_205244.5195+207644.2345	1275
0Safe+0Safe_safe+safe_205244.5195+207736.2437	1028
0Safe+0Safe_safe+safe_205244.5195+207762.2463	1056
0Safe+0Safe_safe+safe_205244.5195+207933.2634	1141
0Safe+0Safe_safe+safe_205244.5195+208027.2728	931
0Safe+0Safe_safe+safe_205244.5195+208233.2934	839
0Safe+0Safe_safe+safe_205244.5195+208249.2950	1046
0Safe+0Safe_safe+safe_205244.5195+208251.2952	1055
0Safe+0Safe_safe+safe_205244.5195+208266.2967	1156
0Safe+0Safe_safe+safe_205244.5195+208280.2981	1233
0Safe+0Safe_safe+safe_205244.5195+208288.2989	1269
0Safe+0Safe_safe+safe_205244.5195+208334.13	775
0Safe+0Safe_safe+safe_205244.5195+208691.451	1055
0Safe+0Safe_safe+safe_205244.5195+208974.706	1262
0Safe+0Safe_safe+safe_205244.5195+209014.742	1059
0Safe+0Safe_safe+safe_205244.5195+209157.3858	1444
0Safe+0Safe_safe+safe_205244.5195+209400.4101	1063
0Safe+0Safe_safe+safe_205244.5195+209597.4298	907
0Safe+0Safe_safe+safe_205244.5195+209963.3164	1158
0Safe+0Safe_safe+safe_205244.5195+209973.3174	1568
0Safe+0Safe_safe+safe_205244.5195+209990.3191	763
0Safe+0Safe_safe+safe_205244.5195+210140.3341	1455
0Safe+0Safe_safe+safe_205244.5195+210313.3514	1298
0Safe+0Safe_safe+safe_205244.5195+210540.3741	1361
0Safe+0Safe_safe+safe_205244.5195+210725.6176	1067
0Safe+0Safe_safe+safe_205244.5195+210743.6194	824
0Safe+0Safe_safe+safe_205244.5195+210809.6260	1218
0Safe+0Safe_safe+safe_205244.5195+210925.6376	1130
0Safe+0Safe_safe+safe_205244.5195+210935.6386	889
0Safe+0Safe_safe+safe_205244.5195+210946.6397	1059
0Safe+0Safe_safe+safe_205244.5195+211135.6586	1035
0Safe+0Safe_safe+safe_205896.5847+205896.5847	343
0Safe+0Safe_safe+safe_205896.5847+205926.5877	1358
0Safe+0Safe_safe+safe_205896.5847+206014.5965	1121
0Safe+0Safe_safe+safe_205896.5847+206141.1592	1199
0Safe+0Safe_safe+safe_205896.5847+206175.1626	943
0Safe+0Safe_safe+safe_205896.5847+206180.1631	1226
0Safe+0Safe_safe+safe_205896.5847+206276.1727	987
0Safe+0Safe_safe+safe_205896.5847+207086.1286	1153
0Safe+0Safe_safe+safe_205896.5847+207133.1333	1135
0Safe+0Safe_safe+safe_205896.5847+207268.1468	911
0Safe+0Safe_safe+safe_205896.5847+207272.1472	942
0Safe+0Safe_safe+safe_205896.5847+207295.1495	985
0Safe+0Safe_safe+safe_205896.5847+207412.862	848
0Safe+0Safe_safe+safe_205896.5847+207644.2345	1431
0Safe+0Safe_safe+safe_205896.5847+207736.2437	1128
0Safe+0Safe_safe+safe_205896.5847+207762.2463	1056
0Safe+0Safe_safe+safe_205896.5847+207933.2634	984
0Safe+0Safe_safe+safe_205896.5847+208027.2728	736
0Safe+0Safe_safe+safe_205896.5847+208233.2934	906
0Safe+0Safe_safe+safe_205896.5847+208249.2950	1212
0Safe+0Safe_safe+safe_205896.5847+208251.2952	1516
0Safe+0Safe_safe+safe_205896.5847+208266.2967	1287
0Safe+0Safe_safe+safe_205896.5847+208280.2981	1341
0Safe+0Safe_safe+safe_205896.5847+208288.2989	1420
0Safe+0Safe_safe+safe_205896.5847+208334.13	939
0Safe+0Safe_safe+safe_205896.5847+208691.451	1252
0Safe+0Safe_safe+safe_205896.5847+208974.706	1265
0Safe+0Safe_safe+safe_205896.5847+209014.742	1295
0Safe+0Safe_safe+safe_205896.5847+209157.3858	1701
0Safe+0Safe_safe+safe_205896.5847+209400.4101	1176
0Safe+0Safe_safe+safe_205896.5847+209597.4298	1002
0Safe+0Safe_safe+safe_205896.5847+209963.3164	1455
0Safe+0Safe_safe+safe_205896.5847+209973.3174	1462
0Safe+0Safe_safe+safe_205896.5847+209990.3191	962
0Safe+0Safe_safe+safe_205896.5847+210140.3341	1432
0Safe+0Safe_safe+safe_205896.5847+210313.3514	1218
0Safe+0Safe_safe+safe_205896.5847+210540.3741	1289
0Safe+0Safe_safe+safe_205896.5847+210725.6176	881
0Safe+0Safe_safe+safe_205896.5847+210743.6194	720
0Safe+0Safe_safe+safe_205896.5847+210809.6260	966
0Safe+0Safe_safe+safe_205896.5847+210925.6376	881
0Safe+0Safe_safe+safe_205896.5847+210935.6386	1124
0Safe+0Safe_safe+safe_205896.5847+210946.6397	1068
0Safe+0Safe_safe+safe_205896.5847+211135.6586	863
0Safe+0Safe_safe+safe_205926.5877+205926.5877	464
0Safe+0Safe_safe+safe_205926.5877+206014.5965	1285
0Safe+0Safe_safe+safe_205926.5877+206141.1592	1393
0Safe+0Safe_safe+safe_205926.5877+206175.1626	1258
0Safe+0Safe_safe+safe_205926.5877+206180.1631	1376
0Safe+0Safe_safe+safe_205926.5877+206276.1727	821
0Safe+0Safe_safe+safe_205926.5877+207086.1286	1330
0Safe+0Safe_safe+safe_205926.5877+207133.1333	1516
0Safe+0Safe_safe+safe_205926.5877+207268.1468	942
0Safe+0Safe_safe+safe_205926.5877+207272.1472	1342
0Safe+0Safe_safe+safe_205926.5877+207295.1495	1301
0Safe+0Safe_safe+safe_205926.5877+207412.862	1287
0Safe+0Safe_safe+safe_205926.5877+207644.2345	1547
0Safe+0Safe_safe+safe_205926.5877+207736.2437	1245
0Safe+0Safe_safe+safe_205926.5877+207762.2463	1196
0Safe+0Safe_safe+safe_205926.5877+207933.2634	1038
0Safe+0Safe_safe+safe_205926.5877+208027.2728	1110
0Safe+0Safe_safe+safe_205926.5877+208233.2934	1124
0Safe+0Safe_safe+safe_205926.5877+208249.2950	1407
0Safe+0Safe_safe+safe_205926.5877+208251.2952	1205
0Safe+0Safe_safe+safe_205926.5877+208266.2967	1193
0Safe+0Safe_safe+safe_205926.5877+208280.2981	1369
0Safe+0Safe_safe+safe_205926.5877+208288.2989	1620
0Safe+0Safe_safe+safe_205926.5877+208334.13	1101
0Safe+0Safe_safe+safe_205926.5877+208691.451	1254
0Safe+0Safe_safe+safe_205926.5877+208974.706	1418
0Safe+0Safe_safe+safe_205926.5877+209014.742	1201
0Safe+0Safe_safe+safe_205926.5877+209157.3858	1373
0Safe+0Safe_safe+safe_205926.5877+209400.4101	1255
0Safe+0Safe_safe+safe_205926.5877+209597.4298	1508
0Safe+0Safe_safe+safe_205926.5877+209963.3164	1167
0Safe+0Safe_safe+safe_205926.5877+209973.3174	1488
0Safe+0Safe_safe+safe_205926.5877+209990.3191	1212
0Safe+0Safe_safe+safe_205926.5877+210140.3341	1417
0Safe+0Safe_safe+safe_205926.5877+210313.3514	1506
0Safe+0Safe_safe+safe_205926.5877+210540.3741	1418
0Safe+0Safe_safe+safe_205926.5877+210725.6176	1293
0Safe+0Safe_safe+safe_205926.5877+210743.6194	1111
0Safe+0Safe_safe+safe_205926.5877+210809.6260	1020
0Safe+0Safe_safe+safe_205926.5877+210925.6376	908
0Safe+0Safe_safe+safe_205926.5877+210935.6386	1453
0Safe+0Safe_safe+safe_205926.5877+210946.6397	1199
0Safe+0Safe_safe+safe_205926.5877+211135.6586	1175
0Safe+0Safe_safe+safe_206014.5965+206014.5965	489
0Safe+0Safe_safe+safe_206014.5965+206141.1592	1119
0Safe+0Safe_safe+safe_206014.5965+206175.1626	1461
0Safe+0Safe_safe+safe_206014.5965+206180.1631	1012
0Safe+0Safe_safe+safe_206014.5965+206276.1727	1045
0Safe+0Safe_safe+safe_206014.5965+207086.1286	1136
0Safe+0Safe_safe+safe_206014.5965+207133.1333	1241
0Safe+0Safe_safe+safe_206014.5965+207268.1468	690
0Safe+0Safe_safe+safe_206014.5965+207272.1472	1002
0Safe+0Safe_safe+safe_206014.5965+207295.1495	1272
0Safe+0Safe_safe+safe_206014.5965+207412.862	1070
0Safe+0Safe_safe+safe_206014.5965+207644.2345	1214
0Safe+0Safe_safe+safe_206014.5965+207736.2437	900
0Safe+0Safe_safe+safe_206014.5965+207762.2463	1110
0Safe+0Safe_safe+safe_206014.5965+207933.2634	1104
0Safe+0Safe_safe+safe_206014.5965+208027.2728	1272
0Safe+0Safe_safe+safe_206014.5965+208233.2934	1038
0Safe+0Safe_safe+safe_206014.5965+208249.2950	1181
0Safe+0Safe_safe+safe_206014.5965+208251.2952	1021
0Safe+0Safe_safe+safe_206014.5965+208266.2967	1052
0Safe+0Safe_safe+safe_206014.5965+208280.2981	1378
0Safe+0Safe_safe+safe_206014.5965+208288.2989	1110
0Safe+0Safe_safe+safe_206014.5965+208334.13	1092
0Safe+0Safe_safe+safe_206014.5965+208691.451	1250
0Safe+0Safe_safe+safe_206014.5965+208974.706	1301
0Safe+0Safe_safe+safe_206014.5965+209014.742	893
0Safe+0Safe_safe+safe_206014.5965+209157.3858	1343
0Safe+0Safe_safe+safe_206014.5965+209400.4101	1304
0Safe+0Safe_safe+safe_206014.5965+209597.4298	997
0Safe+0Safe_safe+safe_206014.5965+209963.3164	1104
0Safe+0Safe_safe+safe_206014.5965+209973.3174	1519
0Safe+0Safe_safe+safe_206014.5965+209990.3191	1156
0Safe+0Safe_safe+safe_206014.5965+210140.3341	1645
0Safe+0Safe_safe+safe_206014.5965+210313.3514	853
0Safe+0Safe_safe+safe_206014.5965+210540.3741	1439
0Safe+0Safe_safe+safe_206014.5965+210725.6176	937
0Safe+0Safe_safe+safe_206014.5965+210743.6194	1118
0Safe+0Safe_safe+safe_206014.5965+210809.6260	736
0Safe+0Safe_safe+safe_206014.5965+210925.6376	971
0Safe+0Safe_safe+safe_206014.5965+210935.6386	928
0Safe+0Safe_safe+safe_206014.5965+210946.6397	1110
0Safe+0Safe_safe+safe_206014.5965+211135.6586	1086
0Safe+0Safe_safe+safe_206141.1592+206141.1592	570
0Safe+0Safe_safe+safe_206141.1592+206175.1626	1307
0Safe+0Safe_safe+safe_206141.1592+206180.1631	994
0Safe+0Safe_safe+safe_206141.1592+206276.1727	1009
0Safe+0Safe_safe+safe_206141.1592+207086.1286	1427
0Safe+0Safe_safe+safe_206141.1592+207133.1333	1686
0Safe+0Safe_safe+safe_206141.1592+207268.1468	804
0Safe+0Safe_safe+safe_206141.1592+207272.1472	1283
0Safe+0Safe_safe+safe_206141.1592+207295.1495	1270
0Safe+0Safe_safe+safe_206141.1592+207412.862	1159
0Safe+0Safe_safe+safe_206141.1592+207644.2345	1920
0Safe+0Safe_safe+safe_206141.1592+207736.2437	1660
0Safe+0Safe_safe+safe_206141.1592+207762.2463	1261
0Safe+0Safe_safe+safe_206141.1592+207933.2634	1392
0Safe+0Safe_safe+safe_206141.1592+208027.2728	1152
0Safe+0Safe_safe+safe_206141.1592+208233.2934	1114
0Safe+0Safe_safe+safe_206141.1592+208249.2950	1444
0Safe+0Safe_safe+safe_206141.1592+208251.2952	1527
0Safe+0Safe_safe+safe_206141.1592+208266.2967	1526
0Safe+0Safe_safe+safe_206141.1592+208280.2981	1891
0Safe+0Safe_safe+safe_206141.1592+208288.2989	1561
0Safe+0Safe_safe+safe_206141.1592+208334.13	1294
0Safe+0Safe_safe+safe_206141.1592+208691.451	1206
0Safe+0Safe_safe+safe_206141.1592+208974.706	1267
0Safe+0Safe_safe+safe_206141.1592+209014.742	1200
0Safe+0Safe_safe+safe_206141.1592+209157.3858	1603
0Safe+0Safe_safe+safe_206141.1592+209400.4101	1403
0Safe+0Safe_safe+safe_206141.1592+209597.4298	1434
0Safe+0Safe_safe+safe_206141.1592+209963.3164	1278
0Safe+0Safe_safe+safe_206141.1592+209973.3174	1682
0Safe+0Safe_safe+safe_206141.1592+209990.3191	1415
0Safe+0Safe_safe+safe_206141.1592+210140.3341	1398
0Safe+0Safe_safe+safe_206141.1592+210313.3514	1134
0Safe+0Safe_safe+safe_206141.1592+210540.3741	1491
0Safe+0Safe_safe+safe_206141.1592+210725.6176	1068
0Safe+0Safe_safe+safe_206141.1592+210743.6194	1181
0Safe+0Safe_safe+safe_206141.1592+210809.6260	1230
0Safe+0Safe_safe+safe_206141.1592+210925.6376	1133
0Safe+0Safe_safe+safe_206141.1592+210935.6386	1235
0Safe+0Safe_safe+safe_206141.1592+210946.6397	1320
0Safe+0Safe_safe+safe_206141.1592+211135.6586	1393
0Safe+0Safe_safe+safe_206175.1626+206175.1626	529
0Safe+0Safe_safe+safe_206175.1626+206180.1631	1010
0Safe+0Safe_safe+safe_206175.1626+206276.1727	861
0Safe+0Safe_safe+safe_206175.1626+207086.1286	1357
0Safe+0Safe_safe+safe_206175.1626+207133.1333	1279
0Safe+0Safe_safe+safe_206175.1626+207268.1468	927
0Safe+0Safe_safe+safe_206175.1626+207272.1472	1334
0Safe+0Safe_safe+safe_206175.1626+207295.1495	1038
0Safe+0Safe_safe+safe_206175.1626+207412.862	1271
0Safe+0Safe_safe+safe_206175.1626+207644.2345	1318
0Safe+0Safe_safe+safe_206175.1626+207736.2437	1067
0Safe+0Safe_safe+safe_206175.1626+207762.2463	1204
0Safe+0Safe_safe+safe_206175.1626+207933.2634	1146
0Safe+0Safe_safe+safe_206175.1626+208027.2728	729
0Safe+0Safe_safe+safe_206175.1626+208233.2934	1220
0Safe+0Safe_safe+safe_206175.1626+208249.2950	1508
0Safe+0Safe_safe+safe_206175.1626+208251.2952	1466
0Safe+0Safe_safe+safe_206175.1626+208266.2967	1179
0Safe+0Safe_safe+safe_206175.1626+208280.2981	1675
0Safe+0Safe_safe+safe_206175.1626+208288.2989	931
0Safe+0Safe_safe+safe_206175.1626+208334.13	945
0Safe+0Safe_safe+safe_206175.1626+208691.451	1233
0Safe+0Safe_safe+safe_206175.1626+208974.706	1538
0Safe+0Safe_safe+safe_206175.1626+209014.742	1063
0Safe+0Safe_safe+safe_206175.1626+209157.3858	1402
0Safe+0Safe_safe+safe_206175.1626+209400.4101	1265
0Safe+0Safe_safe+safe_206175.1626+209597.4298	1171
0Safe+0Safe_safe+safe_206175.1626+209963.3164	1066
0Safe+0Safe_safe+safe_206175.1626+209973.3174	1586
0Safe+0Safe_safe+safe_206175.1626+209990.3191	1306
0Safe+0Safe_safe+safe_206175.1626+210140.3341	1782
0Safe+0Safe_safe+safe_206175.1626+210313.3514	1292
0Safe+0Safe_safe+safe_206175.1626+210540.3741	1344
0Safe+0Safe_safe+safe_206175.1626+210725.6176	1189
0Safe+0Safe_safe+safe_206175.1626+210743.6194	1003
0Safe+0Safe_safe+safe_206175.1626+210809.6260	990
0Safe+0Safe_safe+safe_206175.1626+210925.6376	898
0Safe+0Safe_safe+safe_206175.1626+210935.6386	810
0Safe+0Safe_safe+safe_206175.1626+210946.6397	1017
0Safe+0Safe_safe+safe_206175.1626+211135.6586	1203
0Safe+0Safe_safe+safe_206180.1631+206180.1631	448
0Safe+0Safe_safe+safe_206180.1631+206276.1727	919
0Safe+0Safe_safe+safe_206180.1631+207086.1286	1440
0Safe+0Safe_safe+safe_206180.1631+207133.1333	1298
0Safe+0Safe_safe+safe_206180.1631+207268.1468	825
0Safe+0Safe_safe+safe_206180.1631+207272.1472	1296
0Safe+0Safe_safe+safe_206180.1631+207295.1495	1046
0Safe+0Safe_safe+safe_206180.1631+207412.862	1119
0Safe+0Safe_safe+safe_206180.1631+207644.2345	1206
0Safe+0Safe_safe+safe_206180.1631+207736.2437	1117
0Safe+0Safe_safe+safe_206180.1631+207762.2463	1092
0Safe+0Safe_safe+safe_206180.1631+207933.2634	1261
0Safe+0Safe_safe+safe_206180.1631+208027.2728	1069
0Safe+0Safe_safe+safe_206180.1631+208233.2934	1245
0Safe+0Safe_safe+safe_206180.1631+208249.2950	1185
0Safe+0Safe_safe+safe_206180.1631+208251.2952	1414
0Safe+0Safe_safe+safe_206180.1631+208266.2967	1458
0Safe+0Safe_safe+safe_206180.1631+208280.2981	1403
0Safe+0Safe_safe+safe_206180.1631+208288.2989	1023
0Safe+0Safe_safe+safe_206180.1631+208334.13	1039
0Safe+0Safe_safe+safe_206180.1631+208691.451	984
0Safe+0Safe_safe+safe_206180.1631+208974.706	1411
0Safe+0Safe_safe+safe_206180.1631+209014.742	1109
0Safe+0Safe_safe+safe_206180.1631+209157.3858	1419
0Safe+0Safe_safe+safe_206180.1631+209400.4101	1477
0Safe+0Safe_safe+safe_206180.1631+209597.4298	1230
0Safe+0Safe_safe+safe_206180.1631+209963.3164	1147
0Safe+0Safe_safe+safe_206180.1631+209973.3174	1402
0Safe+0Safe_safe+safe_206180.1631+209990.3191	1070
0Safe+0Safe_safe+safe_206180.1631+210140.3341	1377
0Safe+0Safe_safe+safe_206180.1631+210313.3514	897
0Safe+0Safe_safe+safe_206180.1631+210540.3741	1468
0Safe+0Safe_safe+safe_206180.1631+210725.6176	1064
0Safe+0Safe_safe+safe_206180.1631+210743.6194	1181
0Safe+0Safe_safe+safe_206180.1631+210809.6260	1053
0Safe+0Safe_safe+safe_206180.1631+210925.6376	756
0Safe+0Safe_safe+safe_206180.1631+210935.6386	782
0Safe+0Safe_safe+safe_206180.1631+210946.6397	1452
0Safe+0Safe_safe+safe_206180.1631+211135.6586	981
0Safe+0Safe_safe+safe_206276.1727+206276.1727	219
0Safe+0Safe_safe+safe_206276.1727+207086.1286	983
0Safe+0Safe_safe+safe_206276.1727+207133.1333	916
0Safe+0Safe_safe+safe_206276.1727+207268.1468	592
0Safe+0Safe_safe+safe_206276.1727+207272.1472	1005
0Safe+0Safe_safe+safe_206276.1727+207295.1495	1123
0Safe+0Safe_safe+safe_206276.1727+207412.862	758
0Safe+0Safe_safe+safe_206276.1727+207644.2345	1101
0Safe+0Safe_safe+safe_206276.1727+207736.2437	1055
0Safe+0Safe_safe+safe_206276.1727+207762.2463	932
0Safe+0Safe_safe+safe_206276.1727+207933.2634	1046
0Safe+0Safe_safe+safe_206276.1727+208027.2728	961
0Safe+0Safe_safe+safe_206276.1727+208233.2934	1034
0Safe+0Safe_safe+safe_206276.1727+208249.2950	1224
0Safe+0Safe_safe+safe_206276.1727+208251.2952	1054
0Safe+0Safe_safe+safe_206276.1727+208266.2967	1169
0Safe+0Safe_safe+safe_206276.1727+208280.2981	1350
0Safe+0Safe_safe+safe_206276.1727+208288.2989	1198
0Safe+0Safe_safe+safe_206276.1727+208334.13	886
0Safe+0Safe_safe+safe_206276.1727+208691.451	1010
0Safe+0Safe_safe+safe_206276.1727+208974.706	1239
0Safe+0Safe_safe+safe_206276.1727+209014.742	727
0Safe+0Safe_safe+safe_206276.1727+209157.3858	1223
0Safe+0Safe_safe+safe_206276.1727+209400.4101	1134
0Safe+0Safe_safe+safe_206276.1727+209597.4298	1310
0Safe+0Safe_safe+safe_206276.1727+209963.3164	771
0Safe+0Safe_safe+safe_206276.1727+209973.3174	1503
0Safe+0Safe_safe+safe_206276.1727+209990.3191	918
0Safe+0Safe_safe+safe_206276.1727+210140.3341	957
0Safe+0Safe_safe+safe_206276.1727+210313.3514	927
0Safe+0Safe_safe+safe_206276.1727+210540.3741	1232
0Safe+0Safe_safe+safe_206276.1727+210725.6176	650
0Safe+0Safe_safe+safe_206276.1727+210743.6194	775
0Safe+0Safe_safe+safe_206276.1727+210809.6260	962
0Safe+0Safe_safe+safe_206276.1727+210925.6376	581
0Safe+0Safe_safe+safe_206276.1727+210935.6386	858
0Safe+0Safe_safe+safe_206276.1727+210946.6397	959
0Safe+0Safe_safe+safe_206276.1727+211135.6586	980
0Safe+0Safe_safe+safe_207086.1286+207086.1286	466
0Safe+0Safe_safe+safe_207086.1286+207133.1333	1613
0Safe+0Safe_safe+safe_207086.1286+207268.1468	868
0Safe+0Safe_safe+safe_207086.1286+207272.1472	1122
0Safe+0Safe_safe+safe_207086.1286+207295.1495	1564
0Safe+0Safe_safe+safe_207086.1286+207412.862	1124
0Safe+0Safe_safe+safe_207086.1286+207644.2345	1710
0Safe+0Safe_safe+safe_207086.1286+207736.2437	1245
0Safe+0Safe_safe+safe_207086.1286+207762.2463	1037
0Safe+0Safe_safe+safe_207086.1286+207933.2634	1075
0Safe+0Safe_safe+safe_207086.1286+208027.2728	1326
0Safe+0Safe_safe+safe_207086.1286+208233.2934	1136
0Safe+0Safe_safe+safe_207086.1286+208249.2950	1160
0Safe+0Safe_safe+safe_207086.1286+208251.2952	1298
0Safe+0Safe_safe+safe_207086.1286+208266.2967	1248
0Safe+0Safe_safe+safe_207086.1286+208280.2981	1809
0Safe+0Safe_safe+safe_207086.1286+208288.2989	1253
0Safe+0Safe_safe+safe_207086.1286+208334.13	1033
0Safe+0Safe_safe+safe_207086.1286+208691.451	1222
0Safe+0Safe_safe+safe_207086.1286+208974.706	1494
0Safe+0Safe_safe+safe_207086.1286+209014.742	1122
0Safe+0Safe_safe+safe_207086.1286+209157.3858	1523
0Safe+0Safe_safe+safe_207086.1286+209400.4101	1417
0Safe+0Safe_safe+safe_207086.1286+209597.4298	1131
0Safe+0Safe_safe+safe_207086.1286+209963.3164	1223
0Safe+0Safe_safe+safe_207086.1286+209973.3174	1681
0Safe+0Safe_safe+safe_207086.1286+209990.3191	1368
0Safe+0Safe_safe+safe_207086.1286+210140.3341	2029
0Safe+0Safe_safe+safe_207086.1286+210313.3514	1103
0Safe+0Safe_safe+safe_207086.1286+210540.3741	1315
0Safe+0Safe_safe+safe_207086.1286+210725.6176	1274
0Safe+0Safe_safe+safe_207086.1286+210743.6194	1160
0Safe+0Safe_safe+safe_207086.1286+210809.6260	1247
0Safe+0Safe_safe+safe_207086.1286+210925.6376	1139
0Safe+0Safe_safe+safe_207086.1286+210935.6386	1191
0Safe+0Safe_safe+safe_207086.1286+210946.6397	1226
0Safe+0Safe_safe+safe_207086.1286+211135.6586	1122
0Safe+0Safe_safe+safe_207133.1333+207133.1333	644
0Safe+0Safe_safe+safe_207133.1333+207268.1468	967
0Safe+0Safe_safe+safe_207133.1333+207272.1472	1194
0Safe+0Safe_safe+safe_207133.1333+207295.1495	1535
0Safe+0Safe_safe+safe_207133.1333+207412.862	1318
0Safe+0Safe_safe+safe_207133.1333+207644.2345	1494
0Safe+0Safe_safe+safe_207133.1333+207736.2437	1443
0Safe+0Safe_safe+safe_207133.1333+207762.2463	1244
0Safe+0Safe_safe+safe_207133.1333+207933.2634	1367
0Safe+0Safe_safe+safe_207133.1333+208027.2728	1293
0Safe+0Safe_safe+safe_207133.1333+208233.2934	1569
0Safe+0Safe_safe+safe_207133.1333+208249.2950	1344
0Safe+0Safe_safe+safe_207133.1333+208251.2952	1433
0Safe+0Safe_safe+safe_207133.1333+208266.2967	1432
0Safe+0Safe_safe+safe_207133.1333+208280.2981	1695
0Safe+0Safe_safe+safe_207133.1333+208288.2989	1385
0Safe+0Safe_safe+safe_207133.1333+208334.13	1265
0Safe+0Safe_safe+safe_207133.1333+208691.451	1589
0Safe+0Safe_safe+safe_207133.1333+208974.706	1571
0Safe+0Safe_safe+safe_207133.1333+209014.742	969
0Safe+0Safe_safe+safe_207133.1333+209157.3858	1938
0Safe+0Safe_safe+safe_207133.1333+209400.4101	1415
0Safe+0Safe_safe+safe_207133.1333+209597.4298	1276
0Safe+0Safe_safe+safe_207133.1333+209963.3164	1321
0Safe+0Safe_safe+safe_207133.1333+209973.3174	1736
0Safe+0Safe_safe+safe_207133.1333+209990.3191	1127
0Safe+0Safe_safe+safe_207133.1333+210140.3341	1813
0Safe+0Safe_safe+safe_207133.1333+210313.3514	1345
0Safe+0Safe_safe+safe_207133.1333+210540.3741	1700
0Safe+0Safe_safe+safe_207133.1333+210725.6176	1416
0Safe+0Safe_safe+safe_207133.1333+210743.6194	1225
0Safe+0Safe_safe+safe_207133.1333+210809.6260	1205
0Safe+0Safe_safe+safe_207133.1333+210925.6376	1090
0Safe+0Safe_safe+safe_207133.1333+210935.6386	1098
0Safe+0Safe_safe+safe_207133.1333+210946.6397	1394
0Safe+0Safe_safe+safe_207133.1333+211135.6586	1128
0Safe+0Safe_safe+safe_207268.1468+207268.1468	123
0Safe+0Safe_safe+safe_207268.1468+207272.1472	860
0Safe+0Safe_safe+safe_207268.1468+207295.1495	887
0Safe+0Safe_safe+safe_207268.1468+207412.862	621
0Safe+0Safe_safe+safe_207268.1468+207644.2345	916
0Safe+0Safe_safe+safe_207268.1468+207736.2437	929
0Safe+0Safe_safe+safe_207268.1468+207762.2463	619
0Safe+0Safe_safe+safe_207268.1468+207933.2634	667
0Safe+0Safe_safe+safe_207268.1468+208027.2728	601
0Safe+0Safe_safe+safe_207268.1468+208233.2934	730
0Safe+0Safe_safe+safe_207268.1468+208249.2950	748
0Safe+0Safe_safe+safe_207268.1468+208251.2952	892
0Safe+0Safe_safe+safe_207268.1468+208266.2967	952
0Safe+0Safe_safe+safe_207268.1468+208280.2981	1205
0Safe+0Safe_safe+safe_207268.1468+208288.2989	812
0Safe+0Safe_safe+safe_207268.1468+208334.13	881
0Safe+0Safe_safe+safe_207268.1468+208691.451	1110
0Safe+0Safe_safe+safe_207268.1468+208974.706	1108
0Safe+0Safe_safe+safe_207268.1468+209014.742	843
0Safe+0Safe_safe+safe_207268.1468+209157.3858	842
0Safe+0Safe_safe+safe_207268.1468+209400.4101	822
0Safe+0Safe_safe+safe_207268.1468+209597.4298	653
0Safe+0Safe_safe+safe_207268.1468+209963.3164	812
0Safe+0Safe_safe+safe_207268.1468+209973.3174	1137
0Safe+0Safe_safe+safe_207268.1468+209990.3191	774
0Safe+0Safe_safe+safe_207268.1468+210140.3341	1131
0Safe+0Safe_safe+safe_207268.1468+210313.3514	839
0Safe+0Safe_safe+safe_207268.1468+210540.3741	878
0Safe+0Safe_safe+safe_207268.1468+210725.6176	743
0Safe+0Safe_safe+safe_207268.1468+210743.6194	740
0Safe+0Safe_safe+safe_207268.1468+210809.6260	788
0Safe+0Safe_safe+safe_207268.1468+210925.6376	882
0Safe+0Safe_safe+safe_207268.1468+210935.6386	751
0Safe+0Safe_safe+safe_207268.1468+210946.6397	915
0Safe+0Safe_safe+safe_207268.1468+211135.6586	981
0Safe+0Safe_safe+safe_207272.1472+207272.1472	359
0Safe+0Safe_safe+safe_207272.1472+207295.1495	1361
0Safe+0Safe_safe+safe_207272.1472+207412.862	751
0Safe+0Safe_safe+safe_207272.1472+207644.2345	1264
0Safe+0Safe_safe+safe_207272.1472+207736.2437	1082
0Safe+0Safe_safe+safe_207272.1472+207762.2463	1044
0Safe+0Safe_safe+safe_207272.1472+207933.2634	1010
0Safe+0Safe_safe+safe_207272.1472+208027.2728	884
0Safe+0Safe_safe+safe_207272.1472+208233.2934	921
0Safe+0Safe_safe+safe_207272.1472+208249.2950	1183
0Safe+0Safe_safe+safe_207272.1472+208251.2952	1457
0Safe+0Safe_safe+safe_207272.1472+208266.2967	1185
0Safe+0Safe_safe+safe_207272.1472+208280.2981	1284
0Safe+0Safe_safe+safe_207272.1472+208288.2989	993
0Safe+0Safe_safe+safe_207272.1472+208334.13	1283
0Safe+0Safe_safe+safe_207272.1472+208691.451	1025
0Safe+0Safe_safe+safe_207272.1472+208974.706	1410
0Safe+0Safe_safe+safe_207272.1472+209014.742	948
0Safe+0Safe_safe+safe_207272.1472+209157.3858	1167
0Safe+0Safe_safe+safe_207272.1472+209400.4101	1220
0Safe+0Safe_safe+safe_207272.1472+209597.4298	1174
0Safe+0Safe_safe+safe_207272.1472+209963.3164	1052
0Safe+0Safe_safe+safe_207272.1472+209973.3174	1475
0Safe+0Safe_safe+safe_207272.1472+209990.3191	1004
0Safe+0Safe_safe+safe_207272.1472+210140.3341	1553
0Safe+0Safe_safe+safe_207272.1472+210313.3514	1034
0Safe+0Safe_safe+safe_207272.1472+210540.3741	1099
0Safe+0Safe_safe+safe_207272.1472+210725.6176	1170
0Safe+0Safe_safe+safe_207272.1472+210743.6194	1131
0Safe+0Safe_safe+safe_207272.1472+210809.6260	952
0Safe+0Safe_safe+safe_207272.1472+210925.6376	1007
0Safe+0Safe_safe+safe_207272.1472+210935.6386	1155
0Safe+0Safe_safe+safe_207272.1472+210946.6397	1164
0Safe+0Safe_safe+safe_207272.1472+211135.6586	912
0Safe+0Safe_safe+safe_207295.1495+207295.1495	421
0Safe+0Safe_safe+safe_207295.1495+207412.862	1359
0Safe+0Safe_safe+safe_207295.1495+207644.2345	1587
0Safe+0Safe_safe+safe_207295.1495+207736.2437	1403
0Safe+0Safe_safe+safe_207295.1495+207762.2463	939
0Safe+0Safe_safe+safe_207295.1495+207933.2634	1214
0Safe+0Safe_safe+safe_207295.1495+208027.2728	1221
0Safe+0Safe_safe+safe_207295.1495+208233.2934	1192
0Safe+0Safe_safe+safe_207295.1495+208249.2950	1495
0Safe+0Safe_safe+safe_207295.1495+208251.2952	1306
0Safe+0Safe_safe+safe_207295.1495+208266.2967	1396
0Safe+0Safe_safe+safe_207295.1495+208280.2981	1582
0Safe+0Safe_safe+safe_207295.1495+208288.2989	1286
0Safe+0Safe_safe+safe_207295.1495+208334.13	1208
0Safe+0Safe_safe+safe_207295.1495+208691.451	1221
0Safe+0Safe_safe+safe_207295.1495+208974.706	1593
0Safe+0Safe_safe+safe_207295.1495+209014.742	967
0Safe+0Safe_safe+safe_207295.1495+209157.3858	1438
0Safe+0Safe_safe+safe_207295.1495+209400.4101	1644
0Safe+0Safe_safe+safe_207295.1495+209597.4298	1176
0Safe+0Safe_safe+safe_207295.1495+209963.3164	1174
0Safe+0Safe_safe+safe_207295.1495+209973.3174	1695
0Safe+0Safe_safe+safe_207295.1495+209990.3191	1127
0Safe+0Safe_safe+safe_207295.1495+210140.3341	1271
0Safe+0Safe_safe+safe_207295.1495+210313.3514	1063
0Safe+0Safe_safe+safe_207295.1495+210540.3741	1205
0Safe+0Safe_safe+safe_207295.1495+210725.6176	1229
0Safe+0Safe_safe+safe_207295.1495+210743.6194	1211
0Safe+0Safe_safe+safe_207295.1495+210809.6260	729
0Safe+0Safe_safe+safe_207295.1495+210925.6376	1043
0Safe+0Safe_safe+safe_207295.1495+210935.6386	1181
0Safe+0Safe_safe+safe_207295.1495+210946.6397	1250
0Safe+0Safe_safe+safe_207295.1495+211135.6586	1020
0Safe+0Safe_safe+safe_207412.862+207412.862	184
0Safe+0Safe_safe+safe_207412.862+207644.2345	1660
0Safe+0Safe_safe+safe_207412.862+207736.2437	894
0Safe+0Safe_safe+safe_207412.862+207762.2463	1175
0Safe+0Safe_safe+safe_207412.862+207933.2634	1423
0Safe+0Safe_safe+safe_207412.862+208027.2728	891
0Safe+0Safe_safe+safe_207412.862+208233.2934	949
0Safe+0Safe_safe+safe_207412.862+208249.2950	1281
0Safe+0Safe_safe+safe_207412.862+208251.2952	1529
0Safe+0Safe_safe+safe_207412.862+208266.2967	1254
0Safe+0Safe_safe+safe_207412.862+208280.2981	1257
0Safe+0Safe_safe+safe_207412.862+208288.2989	1134
0Safe+0Safe_safe+safe_207412.862+208334.13	1217
0Safe+0Safe_safe+safe_207412.862+208691.451	881
0Safe+0Safe_safe+safe_207412.862+208974.706	1453
0Safe+0Safe_safe+safe_207412.862+209014.742	1034
0Safe+0Safe_safe+safe_207412.862+209157.3858	1139
0Safe+0Safe_safe+safe_207412.862+209400.4101	1110
0Safe+0Safe_safe+safe_207412.862+209597.4298	1035
0Safe+0Safe_safe+safe_207412.862+209963.3164	1114
0Safe+0Safe_safe+safe_207412.862+209973.3174	1782
0Safe+0Safe_safe+safe_207412.862+209990.3191	1327
0Safe+0Safe_safe+safe_207412.862+210140.3341	1405
0Safe+0Safe_safe+safe_207412.862+210313.3514	1213
0Safe+0Safe_safe+safe_207412.862+210540.3741	1214
0Safe+0Safe_safe+safe_207412.862+210725.6176	1188
0Safe+0Safe_safe+safe_207412.862+210743.6194	917
0Safe+0Safe_safe+safe_207412.862+210809.6260	904
0Safe+0Safe_safe+safe_207412.862+210925.6376	953
0Safe+0Safe_safe+safe_207412.862+210935.6386	1127
0Safe+0Safe_safe+safe_207412.862+210946.6397	1106
0Safe+0Safe_safe+safe_207412.862+211135.6586	901
0Safe+0Safe_safe+safe_207644.2345+207644.2345	547
0Safe+0Safe_safe+safe_207644.2345+207736.2437	1314
0Safe+0Safe_safe+safe_207644.2345+207762.2463	1213
0Safe+0Safe_safe+safe_207644.2345+207933.2634	1268
0Safe+0Safe_safe+safe_207644.2345+208027.2728	1073
0Safe+0Safe_safe+safe_207644.2345+208233.2934	1401
0Safe+0Safe_safe+safe_207644.2345+208249.2950	1059
0Safe+0Safe_safe+safe_207644.2345+208251.2952	1713
0Safe+0Safe_safe+safe_207644.2345+208266.2967	1351
0Safe+0Safe_safe+safe_207644.2345+208280.2981	1898
0Safe+0Safe_safe+safe_207644.2345+208288.2989	1592
0Safe+0Safe_safe+safe_207644.2345+208334.13	1357
0Safe+0Safe_safe+safe_207644.2345+208691.451	1392
0Safe+0Safe_safe+safe_207644.2345+208974.706	1365
0Safe+0Safe_safe+safe_207644.2345+209014.742	1150
0Safe+0Safe_safe+safe_207644.2345+209157.3858	1409
0Safe+0Safe_safe+safe_207644.2345+209400.4101	1379
0Safe+0Safe_safe+safe_207644.2345+209597.4298	1200
0Safe+0Safe_safe+safe_207644.2345+209963.3164	1210
0Safe+0Safe_safe+safe_207644.2345+209973.3174	1807
0Safe+0Safe_safe+safe_207644.2345+209990.3191	1451
0Safe+0Safe_safe+safe_207644.2345+210140.3341	1902
0Safe+0Safe_safe+safe_207644.2345+210313.3514	1413
0Safe+0Safe_safe+safe_207644.2345+210540.3741	1467
0Safe+0Safe_safe+safe_207644.2345+210725.6176	1384
0Safe+0Safe_safe+safe_207644.2345+210743.6194	1300
0Safe+0Safe_safe+safe_207644.2345+210809.6260	1237
0Safe+0Safe_safe+safe_207644.2345+210925.6376	1176
0Safe+0Safe_safe+safe_207644.2345+210935.6386	1135
0Safe+0Safe_safe+safe_207644.2345+210946.6397	1229
0Safe+0Safe_safe+safe_207644.2345+211135.6586	1445
0Safe+0Safe_safe+safe_207736.2437+207736.2437	331
0Safe+0Safe_safe+safe_207736.2437+207762.2463	1071
0Safe+0Safe_safe+safe_207736.2437+207933.2634	1251
0Safe+0Safe_safe+safe_207736.2437+208027.2728	934
0Safe+0Safe_safe+safe_207736.2437+208233.2934	1208
0Safe+0Safe_safe+safe_207736.2437+208249.2950	1139
0Safe+0Safe_safe+safe_207736.2437+208251.2952	1070
0Safe+0Safe_safe+safe_207736.2437+208266.2967	1498
0Safe+0Safe_safe+safe_207736.2437+208280.2981	1547
0Safe+0Safe_safe+safe_207736.2437+208288.2989	1125
0Safe+0Safe_safe+safe_207736.2437+208334.13	901
0Safe+0Safe_safe+safe_207736.2437+208691.451	1412
0Safe+0Safe_safe+safe_207736.2437+208974.706	1361
0Safe+0Safe_safe+safe_207736.2437+209014.742	1045
0Safe+0Safe_safe+safe_207736.2437+209157.3858	1210
0Safe+0Safe_safe+safe_207736.2437+209400.4101	1732
0Safe+0Safe_safe+safe_207736.2437+209597.4298	1091
0Safe+0Safe_safe+safe_207736.2437+209963.3164	1277
0Safe+0Safe_safe+safe_207736.2437+209973.3174	1674
0Safe+0Safe_safe+safe_207736.2437+209990.3191	1060
0Safe+0Safe_safe+safe_207736.2437+210140.3341	1474
0Safe+0Safe_safe+safe_207736.2437+210313.3514	876
0Safe+0Safe_safe+safe_207736.2437+210540.3741	1412
0Safe+0Safe_safe+safe_207736.2437+210725.6176	1187
0Safe+0Safe_safe+safe_207736.2437+210743.6194	1047
0Safe+0Safe_safe+safe_207736.2437+210809.6260	1044
0Safe+0Safe_safe+safe_207736.2437+210925.6376	808
0Safe+0Safe_safe+safe_207736.2437+210935.6386	901
0Safe+0Safe_safe+safe_207736.2437+210946.6397	1311
0Safe+0Safe_safe+safe_207736.2437+211135.6586	986
0Safe+0Safe_safe+safe_207762.2463+207762.2463	347
0Safe+0Safe_safe+safe_207762.2463+207933.2634	1088
0Safe+0Safe_safe+safe_207762.2463+208027.2728	1031
0Safe+0Safe_safe+safe_207762.2463+208233.2934	888
0Safe+0Safe_safe+safe_207762.2463+208249.2950	1205
0Safe+0Safe_safe+safe_207762.2463+208251.2952	1177
0Safe+0Safe_safe+safe_207762.2463+208266.2967	1129
0Safe+0Safe_safe+safe_207762.2463+208280.2981	1268
0Safe+0Safe_safe+safe_207762.2463+208288.2989	1218
0Safe+0Safe_safe+safe_207762.2463+208334.13	952
0Safe+0Safe_safe+safe_207762.2463+208691.451	1114
0Safe+0Safe_safe+safe_207762.2463+208974.706	1251
0Safe+0Safe_safe+safe_207762.2463+209014.742	789
0Safe+0Safe_safe+safe_207762.2463+209157.3858	1272
0Safe+0Safe_safe+safe_207762.2463+209400.4101	1112
0Safe+0Safe_safe+safe_207762.2463+209597.4298	1095
0Safe+0Safe_safe+safe_207762.2463+209963.3164	1134
0Safe+0Safe_safe+safe_207762.2463+209973.3174	1595
0Safe+0Safe_safe+safe_207762.2463+209990.3191	907
0Safe+0Safe_safe+safe_207762.2463+210140.3341	1195
0Safe+0Safe_safe+safe_207762.2463+210313.3514	914
0Safe+0Safe_safe+safe_207762.2463+210540.3741	1268
0Safe+0Safe_safe+safe_207762.2463+210725.6176	1129
0Safe+0Safe_safe+safe_207762.2463+210743.6194	969
0Safe+0Safe_safe+safe_207762.2463+210809.6260	935
0Safe+0Safe_safe+safe_207762.2463+210925.6376	804
0Safe+0Safe_safe+safe_207762.2463+210935.6386	923
0Safe+0Safe_safe+safe_207762.2463+210946.6397	906
0Safe+0Safe_safe+safe_207762.2463+211135.6586	1131
0Safe+0Safe_safe+safe_207933.2634+207933.2634	448
0Safe+0Safe_safe+safe_207933.2634+208027.2728	961
0Safe+0Safe_safe+safe_207933.2634+208233.2934	998
0Safe+0Safe_safe+safe_207933.2634+208249.2950	1042
0Safe+0Safe_safe+safe_207933.2634+208251.2952	1473
0Safe+0Safe_safe+safe_207933.2634+208266.2967	1270
0Safe+0Safe_safe+safe_207933.2634+208280.2981	1519
0Safe+0Safe_safe+safe_207933.2634+208288.2989	1298
0Safe+0Safe_safe+safe_207933.2634+208334.13	1110
0Safe+0Safe_safe+safe_207933.2634+208691.451	1134
0Safe+0Safe_safe+safe_207933.2634+208974.706	1274
0Safe+0Safe_safe+safe_207933.2634+209014.742	621
0Safe+0Safe_safe+safe_207933.2634+209157.3858	1293
0Safe+0Safe_safe+safe_207933.2634+209400.4101	1196
0Safe+0Safe_safe+safe_207933.2634+209597.4298	1347
0Safe+0Safe_safe+safe_207933.2634+209963.3164	1169
0Safe+0Safe_safe+safe_207933.2634+209973.3174	1699
0Safe+0Safe_safe+safe_207933.2634+209990.3191	1350
0Safe+0Safe_safe+safe_207933.2634+210140.3341	1202
0Safe+0Safe_safe+safe_207933.2634+210313.3514	1198
0Safe+0Safe_safe+safe_207933.2634+210540.3741	1428
0Safe+0Safe_safe+safe_207933.2634+210725.6176	1164
0Safe+0Safe_safe+safe_207933.2634+210743.6194	961
0Safe+0Safe_safe+safe_207933.2634+210809.6260	1025
0Safe+0Safe_safe+safe_207933.2634+210925.6376	918
0Safe+0Safe_safe+safe_207933.2634+210935.6386	913
0Safe+0Safe_safe+safe_207933.2634+210946.6397	865
0Safe+0Safe_safe+safe_207933.2634+211135.6586	1192
0Safe+0Safe_safe+safe_208027.2728+208027.2728	238
0Safe+0Safe_safe+safe_208027.2728+208233.2934	1063
0Safe+0Safe_safe+safe_208027.2728+208249.2950	1406
0Safe+0Safe_safe+safe_208027.2728+208251.2952	1159
0Safe+0Safe_safe+safe_208027.2728+208266.2967	1090
0Safe+0Safe_safe+safe_208027.2728+208280.2981	1264
0Safe+0Safe_safe+safe_208027.2728+208288.2989	1330
0Safe+0Safe_safe+safe_208027.2728+208334.13	1097
0Safe+0Safe_safe+safe_208027.2728+208691.451	945
0Safe+0Safe_safe+safe_208027.2728+208974.706	1186
0Safe+0Safe_safe+safe_208027.2728+209014.742	1124
0Safe+0Safe_safe+safe_208027.2728+209157.3858	1343
0Safe+0Safe_safe+safe_208027.2728+209400.4101	1276
0Safe+0Safe_safe+safe_208027.2728+209597.4298	1074
0Safe+0Safe_safe+safe_208027.2728+209963.3164	751
0Safe+0Safe_safe+safe_208027.2728+209973.3174	1557
0Safe+0Safe_safe+safe_208027.2728+209990.3191	973
0Safe+0Safe_safe+safe_208027.2728+210140.3341	1302
0Safe+0Safe_safe+safe_208027.2728+210313.3514	890
0Safe+0Safe_safe+safe_208027.2728+210540.3741	1342
0Safe+0Safe_safe+safe_208027.2728+210725.6176	1037
0Safe+0Safe_safe+safe_208027.2728+210743.6194	970
0Safe+0Safe_safe+safe_208027.2728+210809.6260	1161
0Safe+0Safe_safe+safe_208027.2728+210925.6376	828
0Safe+0Safe_safe+safe_208027.2728+210935.6386	885
0Safe+0Safe_safe+safe_208027.2728+210946.6397	1193
0Safe+0Safe_safe+safe_208027.2728+211135.6586	1026
0Safe+0Safe_safe+safe_208233.2934+208233.2934	382
0Safe+0Safe_safe+safe_208233.2934+208249.2950	1229
0Safe+0Safe_safe+safe_208233.2934+208251.2952	1132
0Safe+0Safe_safe+safe_208233.2934+208266.2967	1168
0Safe+0Safe_safe+safe_208233.2934+208280.2981	1553
0Safe+0Safe_safe+safe_208233.2934+208288.2989	1298
0Safe+0Safe_safe+safe_208233.2934+208334.13	1402
0Safe+0Safe_safe+safe_208233.2934+208691.451	1118
0Safe+0Safe_safe+safe_208233.2934+208974.706	1340
0Safe+0Safe_safe+safe_208233.2934+209014.742	903
0Safe+0Safe_safe+safe_208233.2934+209157.3858	1213
0Safe+0Safe_safe+safe_208233.2934+209400.4101	1070
0Safe+0Safe_safe+safe_208233.2934+209597.4298	1107
0Safe+0Safe_safe+safe_208233.2934+209963.3164	1021
0Safe+0Safe_safe+safe_208233.2934+209973.3174	1455
0Safe+0Safe_safe+safe_208233.2934+209990.3191	931
0Safe+0Safe_safe+safe_208233.2934+210140.3341	1357
0Safe+0Safe_safe+safe_208233.2934+210313.3514	1259
0Safe+0Safe_safe+safe_208233.2934+210540.3741	1601
0Safe+0Safe_safe+safe_208233.2934+210725.6176	1018
0Safe+0Safe_safe+safe_208233.2934+210743.6194	1233
0Safe+0Safe_safe+safe_208233.2934+210809.6260	914
0Safe+0Safe_safe+safe_208233.2934+210925.6376	850
0Safe+0Safe_safe+safe_208233.2934+210935.6386	1054
0Safe+0Safe_safe+safe_208233.2934+210946.6397	1223
0Safe+0Safe_safe+safe_208233.2934+211135.6586	845
0Safe+0Safe_safe+safe_208249.2950+208249.2950	512
0Safe+0Safe_safe+safe_208249.2950+208251.2952	1094
0Safe+0Safe_safe+safe_208249.2950+208266.2967	1161
0Safe+0Safe_safe+safe_208249.2950+208280.2981	1600
0Safe+0Safe_safe+safe_208249.2950+208288.2989	1227
0Safe+0Safe_safe+safe_208249.2950+208334.13	1161
0Safe+0Safe_safe+safe_208249.2950+208691.451	1193
0Safe+0Safe_safe+safe_208249.2950+208974.706	1226
0Safe+0Safe_safe+safe_208249.2950+209014.742	979
0Safe+0Safe_safe+safe_208249.2950+209157.3858	1400
0Safe+0Safe_safe+safe_208249.2950+209400.4101	1711
0Safe+0Safe_safe+safe_208249.2950+209597.4298	1196
0Safe+0Safe_safe+safe_208249.2950+209963.3164	1242
0Safe+0Safe_safe+safe_208249.2950+209973.3174	1457
0Safe+0Safe_safe+safe_208249.2950+209990.3191	1143
0Safe+0Safe_safe+safe_208249.2950+210140.3341	1299
0Safe+0Safe_safe+safe_208249.2950+210313.3514	1063
0Safe+0Safe_safe+safe_208249.2950+210540.3741	1195
0Safe+0Safe_safe+safe_208249.2950+210725.6176	1307
0Safe+0Safe_safe+safe_208249.2950+210743.6194	1041
0Safe+0Safe_safe+safe_208249.2950+210809.6260	786
0Safe+0Safe_safe+safe_208249.2950+210925.6376	992
0Safe+0Safe_safe+safe_208249.2950+210935.6386	963
0Safe+0Safe_safe+safe_208249.2950+210946.6397	1073
0Safe+0Safe_safe+safe_208249.2950+211135.6586	957
0Safe+0Safe_safe+safe_208251.2952+208251.2952	444
0Safe+0Safe_safe+safe_208251.2952+208266.2967	1422
0Safe+0Safe_safe+safe_208251.2952+208280.2981	1853
0Safe+0Safe_safe+safe_208251.2952+208288.2989	1444
0Safe+0Safe_safe+safe_208251.2952+208334.13	1108
0Safe+0Safe_safe+safe_208251.2952+208691.451	1040
0Safe+0Safe_safe+safe_208251.2952+208974.706	1635
0Safe+0Safe_safe+safe_208251.2952+209014.742	1366
0Safe+0Safe_safe+safe_208251.2952+209157.3858	1683
0Safe+0Safe_safe+safe_208251.2952+209400.4101	1425
0Safe+0Safe_safe+safe_208251.2952+209597.4298	1354
0Safe+0Safe_safe+safe_208251.2952+209963.3164	1259
0Safe+0Safe_safe+safe_208251.2952+209973.3174	1859
0Safe+0Safe_safe+safe_208251.2952+209990.3191	1465
0Safe+0Safe_safe+safe_208251.2952+210140.3341	1601
0Safe+0Safe_safe+safe_208251.2952+210313.3514	1205
0Safe+0Safe_safe+safe_208251.2952+210540.3741	1833
0Safe+0Safe_safe+safe_208251.2952+210725.6176	1036
0Safe+0Safe_safe+safe_208251.2952+210743.6194	1140
0Safe+0Safe_safe+safe_208251.2952+210809.6260	960
0Safe+0Safe_safe+safe_208251.2952+210925.6376	965
0Safe+0Safe_safe+safe_208251.2952+210935.6386	1301
0Safe+0Safe_safe+safe_208251.2952+210946.6397	1292
0Safe+0Safe_safe+safe_208251.2952+211135.6586	1372
0Safe+0Safe_safe+safe_208266.2967+208266.2967	613
0Safe+0Safe_safe+safe_208266.2967+208280.2981	2045
0Safe+0Safe_safe+safe_208266.2967+208288.2989	1227
0Safe+0Safe_safe+safe_208266.2967+208334.13	1335
0Safe+0Safe_safe+safe_208266.2967+208691.451	1355
0Safe+0Safe_safe+safe_208266.2967+208974.706	1434
0Safe+0Safe_safe+safe_208266.2967+209014.742	1020
0Safe+0Safe_safe+safe_208266.2967+209157.3858	1329
0Safe+0Safe_safe+safe_208266.2967+209400.4101	1244
0Safe+0Safe_safe+safe_208266.2967+209597.4298	1573
0Safe+0Safe_safe+safe_208266.2967+209963.3164	1424
0Safe+0Safe_safe+safe_208266.2967+209973.3174	1382
0Safe+0Safe_safe+safe_208266.2967+209990.3191	1446
0Safe+0Safe_safe+safe_208266.2967+210140.3341	1773
0Safe+0Safe_safe+safe_208266.2967+210313.3514	989
0Safe+0Safe_safe+safe_208266.2967+210540.3741	1593
0Safe+0Safe_safe+safe_208266.2967+210725.6176	1183
0Safe+0Safe_safe+safe_208266.2967+210743.6194	1103
0Safe+0Safe_safe+safe_208266.2967+210809.6260	1286
0Safe+0Safe_safe+safe_208266.2967+210925.6376	669
0Safe+0Safe_safe+safe_208266.2967+210935.6386	1461
0Safe+0Safe_safe+safe_208266.2967+210946.6397	1077
0Safe+0Safe_safe+safe_208266.2967+211135.6586	1073
0Safe+0Safe_safe+safe_208280.2981+208280.2981	874
0Safe+0Safe_safe+safe_208280.2981+208288.2989	1830
0Safe+0Safe_safe+safe_208280.2981+208334.13	1708
0Safe+0Safe_safe+safe_208280.2981+208691.451	1295
0Safe+0Safe_safe+safe_208280.2981+208974.706	1645
0Safe+0Safe_safe+safe_208280.2981+209014.742	1534
0Safe+0Safe_safe+safe_208280.2981+209157.3858	1620
0Safe+0Safe_safe+safe_208280.2981+209400.4101	1584
0Safe+0Safe_safe+safe_208280.2981+209597.4298	1601
0Safe+0Safe_safe+safe_208280.2981+209963.3164	1301
0Safe+0Safe_safe+safe_208280.2981+209973.3174	1915
0Safe+0Safe_safe+safe_208280.2981+209990.3191	1292
0Safe+0Safe_safe+safe_208280.2981+210140.3341	1716
0Safe+0Safe_safe+safe_208280.2981+210313.3514	1327
0Safe+0Safe_safe+safe_208280.2981+210540.3741	1757
0Safe+0Safe_safe+safe_208280.2981+210725.6176	1355
0Safe+0Safe_safe+safe_208280.2981+210743.6194	1479
0Safe+0Safe_safe+safe_208280.2981+210809.6260	1185
0Safe+0Safe_safe+safe_208280.2981+210925.6376	1106
0Safe+0Safe_safe+safe_208280.2981+210935.6386	1668
0Safe+0Safe_safe+safe_208280.2981+210946.6397	1302
0Safe+0Safe_safe+safe_208280.2981+211135.6586	1192
0Safe+0Safe_safe+safe_208288.2989+208288.2989	416
0Safe+0Safe_safe+safe_208288.2989+208334.13	1074
0Safe+0Safe_safe+safe_208288.2989+208691.451	1194
0Safe+0Safe_safe+safe_208288.2989+208974.706	1528
0Safe+0Safe_safe+safe_208288.2989+209014.742	972
0Safe+0Safe_safe+safe_208288.2989+209157.3858	1465
0Safe+0Safe_safe+safe_208288.2989+209400.4101	1338
0Safe+0Safe_safe+safe_208288.2989+209597.4298	1165
0Safe+0Safe_safe+safe_208288.2989+209963.3164	1638
0Safe+0Safe_safe+safe_208288.2989+209973.3174	1519
0Safe+0Safe_safe+safe_208288.2989+209990.3191	1227
0Safe+0Safe_safe+safe_208288.2989+210140.3341	1617
0Safe+0Safe_safe+safe_208288.2989+210313.3514	1259
0Safe+0Safe_safe+safe_208288.2989+210540.3741	1393
0Safe+0Safe_safe+safe_208288.2989+210725.6176	1171
0Safe+0Safe_safe+safe_208288.2989+210743.6194	1276
0Safe+0Safe_safe+safe_208288.2989+210809.6260	1180
0Safe+0Safe_safe+safe_208288.2989+210925.6376	951
0Safe+0Safe_safe+safe_208288.2989+210935.6386	1053
0Safe+0Safe_safe+safe_208288.2989+210946.6397	1368
0Safe+0Safe_safe+safe_208288.2989+211135.6586	1128
0Safe+0Safe_safe+safe_208334.13+208334.13	403
0Safe+0Safe_safe+safe_208334.13+208691.451	1021
0Safe+0Safe_safe+safe_208334.13+208974.706	1459
0Safe+0Safe_safe+safe_208334.13+209014.742	1084
0Safe+0Safe_safe+safe_208334.13+209157.3858	1275
0Safe+0Safe_safe+safe_208334.13+209400.4101	1221
0Safe+0Safe_safe+safe_208334.13+209597.4298	1019
0Safe+0Safe_safe+safe_208334.13+209963.3164	873
0Safe+0Safe_safe+safe_208334.13+209973.3174	1674
0Safe+0Safe_safe+safe_208334.13+209990.3191	1214
0Safe+0Safe_safe+safe_208334.13+210140.3341	1384
0Safe+0Safe_safe+safe_208334.13+210313.3514	1273
0Safe+0Safe_safe+safe_208334.13+210540.3741	1203
0Safe+0Safe_safe+safe_208334.13+210725.6176	1086
0Safe+0Safe_safe+safe_208334.13+210743.6194	944
0Safe+0Safe_safe+safe_208334.13+210809.6260	931
0Safe+0Safe_safe+safe_208334.13+210925.6376	1107
0Safe+0Safe_safe+safe_208334.13+210935.6386	954
0Safe+0Safe_safe+safe_208334.13+210946.6397	1504
0Safe+0Safe_safe+safe_208334.13+211135.6586	832
0Safe+0Safe_safe+safe_208691.451+208691.451	464
0Safe+0Safe_safe+safe_208691.451+208974.706	1276
0Safe+0Safe_safe+safe_208691.451+209014.742	907
0Safe+0Safe_safe+safe_208691.451+209157.3858	1196
0Safe+0Safe_safe+safe_208691.451+209400.4101	1405
0Safe+0Safe_safe+safe_208691.451+209597.4298	1068
0Safe+0Safe_safe+safe_208691.451+209963.3164	1069
0Safe+0Safe_safe+safe_208691.451+209973.3174	1632
0Safe+0Safe_safe+safe_208691.451+209990.3191	987
0Safe+0Safe_safe+safe_208691.451+210140.3341	1357
0Safe+0Safe_safe+safe_208691.451+210313.3514	1373
0Safe+0Safe_safe+safe_208691.451+210540.3741	1360
0Safe+0Safe_safe+safe_208691.451+210725.6176	938
0Safe+0Safe_safe+safe_208691.451+210743.6194	1199
0Safe+0Safe_safe+safe_208691.451+210809.6260	1172
0Safe+0Safe_safe+safe_208691.451+210925.6376	938
0Safe+0Safe_safe+safe_208691.451+210935.6386	1240
0Safe+0Safe_safe+safe_208691.451+210946.6397	996
0Safe+0Safe_safe+safe_208691.451+211135.6586	906
0Safe+0Safe_safe+safe_208974.706+208974.706	494
0Safe+0Safe_safe+safe_208974.706+209014.742	1123
0Safe+0Safe_safe+safe_208974.706+209157.3858	1515
0Safe+0Safe_safe+safe_208974.706+209400.4101	1236
0Safe+0Safe_safe+safe_208974.706+209597.4298	1030
0Safe+0Safe_safe+safe_208974.706+209963.3164	1857
0Safe+0Safe_safe+safe_208974.706+209973.3174	1751
0Safe+0Safe_safe+safe_208974.706+209990.3191	1224
0Safe+0Safe_safe+safe_208974.706+210140.3341	1752
0Safe+0Safe_safe+safe_208974.706+210313.3514	1228
0Safe+0Safe_safe+safe_208974.706+210540.3741	1574
0Safe+0Safe_safe+safe_208974.706+210725.6176	1338
0Safe+0Safe_safe+safe_208974.706+210743.6194	1495
0Safe+0Safe_safe+safe_208974.706+210809.6260	1293
0Safe+0Safe_safe+safe_208974.706+210925.6376	1071
0Safe+0Safe_safe+safe_208974.706+210935.6386	1463
0Safe+0Safe_safe+safe_208974.706+210946.6397	1259
0Safe+0Safe_safe+safe_208974.706+211135.6586	1543
0Safe+0Safe_safe+safe_209014.742+209014.742	393
0Safe+0Safe_safe+safe_209014.742+209157.3858	1063
0Safe+0Safe_safe+safe_209014.742+209400.4101	1012
0Safe+0Safe_safe+safe_209014.742+209597.4298	1187
0Safe+0Safe_safe+safe_209014.742+209963.3164	1045
0Safe+0Safe_safe+safe_209014.742+209973.3174	1356
0Safe+0Safe_safe+safe_209014.742+209990.3191	912
0Safe+0Safe_safe+safe_209014.742+210140.3341	1519
0Safe+0Safe_safe+safe_209014.742+210313.3514	770
0Safe+0Safe_safe+safe_209014.742+210540.3741	1100
0Safe+0Safe_safe+safe_209014.742+210725.6176	976
0Safe+0Safe_safe+safe_209014.742+210743.6194	945
0Safe+0Safe_safe+safe_209014.742+210809.6260	869
0Safe+0Safe_safe+safe_209014.742+210925.6376	1064
0Safe+0Safe_safe+safe_209014.742+210935.6386	963
0Safe+0Safe_safe+safe_209014.742+210946.6397	1160
0Safe+0Safe_safe+safe_209014.742+211135.6586	866
0Safe+0Safe_safe+safe_209157.3858+209157.3858	785
0Safe+0Safe_safe+safe_209157.3858+209400.4101	1208
0Safe+0Safe_safe+safe_209157.3858+209597.4298	1604
0Safe+0Safe_safe+safe_209157.3858+209963.3164	1514
0Safe+0Safe_safe+safe_209157.3858+209973.3174	1808
0Safe+0Safe_safe+safe_209157.3858+209990.3191	1174
0Safe+0Safe_safe+safe_209157.3858+210140.3341	1701
0Safe+0Safe_safe+safe_209157.3858+210313.3514	1289
0Safe+0Safe_safe+safe_209157.3858+210540.3741	1747
0Safe+0Safe_safe+safe_209157.3858+210725.6176	995
0Safe+0Safe_safe+safe_209157.3858+210743.6194	1541
0Safe+0Safe_safe+safe_209157.3858+210809.6260	1279
0Safe+0Safe_safe+safe_209157.3858+210925.6376	1051
0Safe+0Safe_safe+safe_209157.3858+210935.6386	1302
0Safe+0Safe_safe+safe_209157.3858+210946.6397	1324
0Safe+0Safe_safe+safe_209157.3858+211135.6586	1338
0Safe+0Safe_safe+safe_209400.4101+209400.4101	522
0Safe+0Safe_safe+safe_209400.4101+209597.4298	1197
0Safe+0Safe_safe+safe_209400.4101+209963.3164	1417
0Safe+0Safe_safe+safe_209400.4101+209973.3174	1739
0Safe+0Safe_safe+safe_209400.4101+209990.3191	1194
0Safe+0Safe_safe+safe_209400.4101+210140.3341	1845
0Safe+0Safe_safe+safe_209400.4101+210313.3514	1164
0Safe+0Safe_safe+safe_209400.4101+210540.3741	1694
0Safe+0Safe_safe+safe_209400.4101+210725.6176	1040
0Safe+0Safe_safe+safe_209400.4101+210743.6194	1126
0Safe+0Safe_safe+safe_209400.4101+210809.6260	1401
0Safe+0Safe_safe+safe_209400.4101+210925.6376	1109
0Safe+0Safe_safe+safe_209400.4101+210935.6386	1057
0Safe+0Safe_safe+safe_209400.4101+210946.6397	1180
0Safe+0Safe_safe+safe_209400.4101+211135.6586	1145
0Safe+0Safe_safe+safe_209597.4298+209597.4298	372
0Safe+0Safe_safe+safe_209597.4298+209963.3164	1423
0Safe+0Safe_safe+safe_209597.4298+209973.3174	1596
0Safe+0Safe_safe+safe_209597.4298+209990.3191	1282
0Safe+0Safe_safe+safe_209597.4298+210140.3341	1702
0Safe+0Safe_safe+safe_209597.4298+210313.3514	944
0Safe+0Safe_safe+safe_209597.4298+210540.3741	1544
0Safe+0Safe_safe+safe_209597.4298+210725.6176	906
0Safe+0Safe_safe+safe_209597.4298+210743.6194	1445
0Safe+0Safe_safe+safe_209597.4298+210809.6260	1122
0Safe+0Safe_safe+safe_209597.4298+210925.6376	807
0Safe+0Safe_safe+safe_209597.4298+210935.6386	1302
0Safe+0Safe_safe+safe_209597.4298+210946.6397	1295
0Safe+0Safe_safe+safe_209597.4298+211135.6586	968
0Safe+0Safe_safe+safe_209963.3164+209963.3164	362
0Safe+0Safe_safe+safe_209963.3164+209973.3174	1653
0Safe+0Safe_safe+safe_209963.3164+209990.3191	988
0Safe+0Safe_safe+safe_209963.3164+210140.3341	1572
0Safe+0Safe_safe+safe_209963.3164+210313.3514	1151
0Safe+0Safe_safe+safe_209963.3164+210540.3741	1486
0Safe+0Safe_safe+safe_209963.3164+210725.6176	1163
0Safe+0Safe_safe+safe_209963.3164+210743.6194	845
0Safe+0Safe_safe+safe_209963.3164+210809.6260	1195
0Safe+0Safe_safe+safe_209963.3164+210925.6376	983
0Safe+0Safe_safe+safe_209963.3164+210935.6386	1180
0Safe+0Safe_safe+safe_209963.3164+210946.6397	1265
0Safe+0Safe_safe+safe_209963.3164+211135.6586	1089
0Safe+0Safe_safe+safe_209973.3174+209973.3174	747
0Safe+0Safe_safe+safe_209973.3174+209990.3191	1595
0Safe+0Safe_safe+safe_209973.3174+210140.3341	1848
0Safe+0Safe_safe+safe_209973.3174+210313.3514	1460
0Safe+0Safe_safe+safe_209973.3174+210540.3741	2055
0Safe+0Safe_safe+safe_209973.3174+210725.6176	1888
0Safe+0Safe_safe+safe_209973.3174+210743.6194	1530
0Safe+0Safe_safe+safe_209973.3174+210809.6260	1320
0Safe+0Safe_safe+safe_209973.3174+210925.6376	1441
0Safe+0Safe_safe+safe_209973.3174+210935.6386	1416
0Safe+0Safe_safe+safe_209973.3174+210946.6397	1619
0Safe+0Safe_safe+safe_209973.3174+211135.6586	1429
0Safe+0Safe_safe+safe_209990.3191+209990.3191	337
0Safe+0Safe_safe+safe_209990.3191+210140.3341	1512
0Safe+0Safe_safe+safe_209990.3191+210313.3514	904
0Safe+0Safe_safe+safe_209990.3191+210540.3741	1094
0Safe+0Safe_safe+safe_209990.3191+210725.6176	795
0Safe+0Safe_safe+safe_209990.3191+210743.6194	979
0Safe+0Safe_safe+safe_209990.3191+210809.6260	946
0Safe+0Safe_safe+safe_209990.3191+210925.6376	949
0Safe+0Safe_safe+safe_209990.3191+210935.6386	1012
0Safe+0Safe_safe+safe_209990.3191+210946.6397	1141
0Safe+0Safe_safe+safe_209990.3191+211135.6586	706
0Safe+0Safe_safe+safe_210140.3341+210140.3341	602
0Safe+0Safe_safe+safe_210140.3341+210313.3514	1273
0Safe+0Safe_safe+safe_210140.3341+210540.3741	1792
0Safe+0Safe_safe+safe_210140.3341+210725.6176	1501
0Safe+0Safe_safe+safe_210140.3341+210743.6194	1526
0Safe+0Safe_safe+safe_210140.3341+210809.6260	1245
0Safe+0Safe_safe+safe_210140.3341+210925.6376	1190
0Safe+0Safe_safe+safe_210140.3341+210935.6386	1308
0Safe+0Safe_safe+safe_210140.3341+210946.6397	1523
0Safe+0Safe_safe+safe_210140.3341+211135.6586	1478
0Safe+0Safe_safe+safe_210313.3514+210313.3514	439
0Safe+0Safe_safe+safe_210313.3514+210540.3741	1185
0Safe+0Safe_safe+safe_210313.3514+210725.6176	1182
0Safe+0Safe_safe+safe_210313.3514+210743.6194	897
0Safe+0Safe_safe+safe_210313.3514+210809.6260	1029
0Safe+0Safe_safe+safe_210313.3514+210925.6376	969
0Safe+0Safe_safe+safe_210313.3514+210935.6386	1076
0Safe+0Safe_safe+safe_210313.3514+210946.6397	1118
0Safe+0Safe_safe+safe_210313.3514+211135.6586	769
0Safe+0Safe_safe+safe_210540.3741+210540.3741	341
0Safe+0Safe_safe+safe_210540.3741+210725.6176	1012
0Safe+0Safe_safe+safe_210540.3741+210743.6194	1275
0Safe+0Safe_safe+safe_210540.3741+210809.6260	1134
0Safe+0Safe_safe+safe_210540.3741+210925.6376	1077
0Safe+0Safe_safe+safe_210540.3741+210935.6386	1394
0Safe+0Safe_safe+safe_210540.3741+210946.6397	1370
0Safe+0Safe_safe+safe_210540.3741+211135.6586	1310
0Safe+0Safe_safe+safe_210725.6176+210725.6176	169
0Safe+0Safe_safe+safe_210725.6176+210743.6194	900
0Safe+0Safe_safe+safe_210725.6176+210809.6260	1103
0Safe+0Safe_safe+safe_210725.6176+210925.6376	1053
0Safe+0Safe_safe+safe_210725.6176+210935.6386	867
0Safe+0Safe_safe+safe_210725.6176+210946.6397	1152
0Safe+0Safe_safe+safe_210725.6176+211135.6586	1105
0Safe+0Safe_safe+safe_210743.6194+210743.6194	576
0Safe+0Safe_safe+safe_210743.6194+210809.6260	833
0Safe+0Safe_safe+safe_210743.6194+210925.6376	1056
0Safe+0Safe_safe+safe_210743.6194+210935.6386	930
0Safe+0Safe_safe+safe_210743.6194+210946.6397	1108
0Safe+0Safe_safe+safe_210743.6194+211135.6586	1189
0Safe+0Safe_safe+safe_210809.6260+210809.6260	318
0Safe+0Safe_safe+safe_210809.6260+210925.6376	823
0Safe+0Safe_safe+safe_210809.6260+210935.6386	1019
0Safe+0Safe_safe+safe_210809.6260+210946.6397	1031
0Safe+0Safe_safe+safe_210809.6260+211135.6586	954
0Safe+0Safe_safe+safe_210925.6376+210925.6376	371
0Safe+0Safe_safe+safe_210925.6376+210935.6386	931
0Safe+0Safe_safe+safe_210925.6376+210946.6397	1098
0Safe+0Safe_safe+safe_210925.6376+211135.6586	915
0Safe+0Safe_safe+safe_210935.6386+210935.6386	372
0Safe+0Safe_safe+safe_210935.6386+210946.6397	1290
0Safe+0Safe_safe+safe_210935.6386+211135.6586	1022
0Safe+0Safe_safe+safe_210946.6397+210946.6397	528
0Safe+0Safe_safe+safe_210946.6397+211135.6586	1105
0Safe+0Safe_safe+safe_211135.6586+211135.6586	414
AKAP9+AKAP9_P1P2+P1P2_5225+5225	253
AKAP9+AKAP9_P1P2+P1P2_5225+5229	818
AKAP9+AKAP9_P1P2+P1P2_5225+5230	466
AKAP9+AKAP9_P1P2+P1P2_5229+5229	264
AKAP9+AKAP9_P1P2+P1P2_5229+5230	380
AKAP9+AKAP9_P1P2+P1P2_5230+5230	144
AKAP9+ANAPC2_P1P2+P1P2_5225+6711	426
AKAP9+ANAPC2_P1P2+P1P2_5225+6716	531
AKAP9+ANAPC2_P1P2+P1P2_5225+6719	34
AKAP9+ANAPC2_P1P2+P1P2_5229+6711	260
AKAP9+ANAPC2_P1P2+P1P2_5229+6716	384
AKAP9+ANAPC2_P1P2+P1P2_5229+6719	38
AKAP9+ANAPC2_P1P2+P1P2_5230+6711	194
AKAP9+ANAPC2_P1P2+P1P2_5230+6716	436
AKAP9+ANAPC2_P1P2+P1P2_5230+6719	53
AKAP9+AP1M1_P1P2+P1P2_5225+8191	638
AKAP9+AP1M1_P1P2+P1P2_5225+8195	823
AKAP9+AP1M1_P1P2+P1P2_5225+8199	865
AKAP9+AP1M1_P1P2+P1P2_5229+8191	458
AKAP9+AP1M1_P1P2+P1P2_5229+8195	606
AKAP9+AP1M1_P1P2+P1P2_5229+8199	660
AKAP9+AP1M1_P1P2+P1P2_5230+8191	429
AKAP9+AP1M1_P1P2+P1P2_5230+8195	575
AKAP9+AP1M1_P1P2+P1P2_5230+8199	517
AKAP9+AP2A1_P1P2+P1P2_5225+8241	422
AKAP9+AP2A1_P1P2+P1P2_5225+8243	259
AKAP9+AP2A1_P1P2+P1P2_5225+8244	27
AKAP9+AP2A1_P1P2+P1P2_5229+8241	331
AKAP9+AP2A1_P1P2+P1P2_5229+8243	212
AKAP9+AP2A1_P1P2+P1P2_5229+8244	21
AKAP9+AP2A1_P1P2+P1P2_5230+8241	299
AKAP9+AP2A1_P1P2+P1P2_5230+8243	243
AKAP9+AP2A1_P1P2+P1P2_5230+8244	70
AKAP9+ARL1_P1P2+P1P2_10491+5225	118
AKAP9+ARL1_P1P2+P1P2_10491+5229	43
AKAP9+ARL1_P1P2+P1P2_10491+5230	60
AKAP9+ARL1_P1P2+P1P2_10492+5225	136
AKAP9+ARL1_P1P2+P1P2_10492+5229	153
AKAP9+ARL1_P1P2+P1P2_10492+5230	96
AKAP9+ARL1_P1P2+P1P2_10498+5225	633
AKAP9+ARL1_P1P2+P1P2_10498+5229	319
AKAP9+ARL1_P1P2+P1P2_10498+5230	468
AKAP9+ASNA1_P1P2+P1P2_11971+5225	281
AKAP9+ASNA1_P1P2+P1P2_11971+5229	231
AKAP9+ASNA1_P1P2+P1P2_11971+5230	213
AKAP9+ASNA1_P1P2+P1P2_11973+5225	133
AKAP9+ASNA1_P1P2+P1P2_11973+5229	83
AKAP9+ASNA1_P1P2+P1P2_11973+5230	88
AKAP9+ASNA1_P1P2+P1P2_11977+5225	410
AKAP9+ASNA1_P1P2+P1P2_11977+5229	347
AKAP9+ASNA1_P1P2+P1P2_11977+5230	178
AKAP9+ATP5A1_P1+P1P2_13072+5225	116
AKAP9+ATP5A1_P1+P1P2_13072+5229	93
AKAP9+ATP5A1_P1+P1P2_13072+5230	85
AKAP9+ATP5A1_P1+P1P2_13073+5225	317
AKAP9+ATP5A1_P1+P1P2_13073+5229	270
AKAP9+ATP5A1_P1+P1P2_13073+5230	289
AKAP9+ATP5A1_P1+P1P2_13076+5225	355
AKAP9+ATP5A1_P1+P1P2_13076+5229	311
AKAP9+ATP5A1_P1+P1P2_13076+5230	297
AKAP9+ATP5B_P1P2+P1P2_13092+5225	86
AKAP9+ATP5B_P1P2+P1P2_13092+5229	81
AKAP9+ATP5B_P1P2+P1P2_13092+5230	35
AKAP9+ATP5B_P1P2+P1P2_13096+5225	95
AKAP9+ATP5B_P1P2+P1P2_13096+5229	89
AKAP9+ATP5B_P1P2+P1P2_13096+5230	42
AKAP9+ATP5B_P1P2+P1P2_13098+5225	102
AKAP9+ATP5B_P1P2+P1P2_13098+5229	54
AKAP9+ATP5B_P1P2+P1P2_13098+5230	36
AKAP9+BAG6_P1P2+P1P2_14691+5225	978
AKAP9+BAG6_P1P2+P1P2_14691+5229	608
AKAP9+BAG6_P1P2+P1P2_14691+5230	430
AKAP9+BAG6_P1P2+P1P2_14692+5225	69
AKAP9+BAG6_P1P2+P1P2_14692+5229	75
AKAP9+BAG6_P1P2+P1P2_14692+5230	55
AKAP9+BAG6_P1P2+P1P2_14694+5225	904
AKAP9+BAG6_P1P2+P1P2_14694+5229	795
AKAP9+BAG6_P1P2+P1P2_14694+5230	622
AKAP9+CAMLG_P1P2+P1P2_25801+5225	790
AKAP9+CAMLG_P1P2+P1P2_25801+5229	688
AKAP9+CAMLG_P1P2+P1P2_25801+5230	441
AKAP9+CAMLG_P1P2+P1P2_25802+5225	262
AKAP9+CAMLG_P1P2+P1P2_25802+5229	182
AKAP9+CAMLG_P1P2+P1P2_25802+5230	151
AKAP9+CAMLG_P1P2+P1P2_25803+5225	155
AKAP9+CAMLG_P1P2+P1P2_25803+5229	159
AKAP9+CAMLG_P1P2+P1P2_25803+5230	108
AKAP9+CCNA2_P1P2+P1P2_29242+5225	391
AKAP9+CCNA2_P1P2+P1P2_29242+5229	236
AKAP9+CCNA2_P1P2+P1P2_29242+5230	274
AKAP9+CCNA2_P1P2+P1P2_29248+5225	202
AKAP9+CCNA2_P1P2+P1P2_29248+5229	197
AKAP9+CCNA2_P1P2+P1P2_29248+5230	165
AKAP9+CCNA2_P1P2+P1P2_29250+5225	88
AKAP9+CCNA2_P1P2+P1P2_29250+5229	123
AKAP9+CCNA2_P1P2+P1P2_29250+5230	71
AKAP9+CCT3_P1P2+P1P2_29751+5225	7
AKAP9+CCT3_P1P2+P1P2_29751+5229	34
AKAP9+CCT3_P1P2+P1P2_29751+5230	11
AKAP9+CCT3_P1P2+P1P2_29755+5225	29
AKAP9+CCT3_P1P2+P1P2_29755+5229	5
AKAP9+CCT3_P1P2+P1P2_29755+5230	10
AKAP9+CCT3_P1P2+P1P2_29758+5225	35
AKAP9+CCT3_P1P2+P1P2_29758+5229	62
AKAP9+CCT3_P1P2+P1P2_29758+5230	103
AKAP9+CCT4_P1P2+P1P2_29763+5225	72
AKAP9+CCT4_P1P2+P1P2_29763+5229	99
AKAP9+CCT4_P1P2+P1P2_29763+5230	82
AKAP9+CCT4_P1P2+P1P2_29768+5225	37
AKAP9+CCT4_P1P2+P1P2_29768+5229	20
AKAP9+CCT4_P1P2+P1P2_29768+5230	34
AKAP9+CCT4_P1P2+P1P2_29770+5225	99
AKAP9+CCT4_P1P2+P1P2_29770+5229	69
AKAP9+CCT4_P1P2+P1P2_29770+5230	55
AKAP9+CHAF1A_P1P2+P1P2_33862+5225	42
AKAP9+CHAF1A_P1P2+P1P2_33862+5229	84
AKAP9+CHAF1A_P1P2+P1P2_33862+5230	80
AKAP9+CHAF1A_P1P2+P1P2_33863+5225	74
AKAP9+CHAF1A_P1P2+P1P2_33863+5229	114
AKAP9+CHAF1A_P1P2+P1P2_33863+5230	47
AKAP9+CHAF1A_P1P2+P1P2_33869+5225	97
AKAP9+CHAF1A_P1P2+P1P2_33869+5229	3
AKAP9+CHAF1A_P1P2+P1P2_33869+5230	35
AKAP9+COG3_P1P2+P1P2_37961+5225	69
AKAP9+COG3_P1P2+P1P2_37961+5229	125
AKAP9+COG3_P1P2+P1P2_37961+5230	80
AKAP9+COG3_P1P2+P1P2_37963+5225	305
AKAP9+COG3_P1P2+P1P2_37963+5229	236
AKAP9+COG3_P1P2+P1P2_37963+5230	220
AKAP9+COG3_P1P2+P1P2_37964+5225	26
AKAP9+COG3_P1P2+P1P2_37964+5229	22
AKAP9+COG3_P1P2+P1P2_37964+5230	53
AKAP9+COG4_P1P2+P1P2_37974+5225	124
AKAP9+COG4_P1P2+P1P2_37974+5229	173
AKAP9+COG4_P1P2+P1P2_37974+5230	179
AKAP9+COG4_P1P2+P1P2_37976+5225	311
AKAP9+COG4_P1P2+P1P2_37976+5229	168
AKAP9+COG4_P1P2+P1P2_37976+5230	151
AKAP9+COG4_P1P2+P1P2_37980+5225	532
AKAP9+COG4_P1P2+P1P2_37980+5229	562
AKAP9+COG4_P1P2+P1P2_37980+5230	566
AKAP9+COPA_P1P2+P1P2_38732+5225	9
AKAP9+COPA_P1P2+P1P2_38732+5229	2
AKAP9+COPA_P1P2+P1P2_38732+5230	27
AKAP9+COPA_P1P2+P1P2_38734+5225	81
AKAP9+COPA_P1P2+P1P2_38734+5229	137
AKAP9+COPA_P1P2+P1P2_38734+5230	48
AKAP9+COPA_P1P2+P1P2_38738+5225	419
AKAP9+COPA_P1P2+P1P2_38738+5229	200
AKAP9+COPA_P1P2+P1P2_38738+5230	323
AKAP9+COPB1_P1P2+P1P2_38741+5229	2
AKAP9+COPB1_P1P2+P1P2_38742+5225	37
AKAP9+COPB1_P1P2+P1P2_38742+5229	6
AKAP9+COPB1_P1P2+P1P2_38742+5230	4
AKAP9+COPB1_P1P2+P1P2_38743+5225	79
AKAP9+COPB1_P1P2+P1P2_38743+5229	21
AKAP9+COPB1_P1P2+P1P2_38743+5230	97
AKAP9+COPS4_P1P2+P1P2_38833+5225	198
AKAP9+COPS4_P1P2+P1P2_38833+5229	173
AKAP9+COPS4_P1P2+P1P2_38833+5230	78
AKAP9+COPS4_P1P2+P1P2_38834+5225	376
AKAP9+COPS4_P1P2+P1P2_38834+5229	426
AKAP9+COPS4_P1P2+P1P2_38834+5230	222
AKAP9+COPS4_P1P2+P1P2_38835+5225	182
AKAP9+COPS4_P1P2+P1P2_38835+5229	92
AKAP9+COPS4_P1P2+P1P2_38835+5230	125
AKAP9+COX7C_P1P2+P1P2_39372+5225	144
AKAP9+COX7C_P1P2+P1P2_39372+5229	193
AKAP9+COX7C_P1P2+P1P2_39372+5230	65
AKAP9+COX7C_P1P2+P1P2_39375+5225	57
AKAP9+COX7C_P1P2+P1P2_39375+5229	97
AKAP9+COX7C_P1P2+P1P2_39375+5230	72
AKAP9+COX7C_P1P2+P1P2_39376+5225	363
AKAP9+COX7C_P1P2+P1P2_39376+5229	297
AKAP9+COX7C_P1P2+P1P2_39376+5230	346
AKAP9+DCAF13_P1P2+P1P2_44661+5225	87
AKAP9+DCAF13_P1P2+P1P2_44661+5229	55
AKAP9+DCAF13_P1P2+P1P2_44661+5230	83
AKAP9+DCAF13_P1P2+P1P2_44662+5225	97
AKAP9+DCAF13_P1P2+P1P2_44662+5229	64
AKAP9+DCAF13_P1P2+P1P2_44662+5230	78
AKAP9+DCAF13_P1P2+P1P2_44668+5225	85
AKAP9+DCAF13_P1P2+P1P2_44668+5229	19
AKAP9+DCAF13_P1P2+P1P2_44668+5230	41
AKAP9+DCTN1_P1P2+P1P2_45121+5225	124
AKAP9+DCTN1_P1P2+P1P2_45121+5229	77
AKAP9+DCTN1_P1P2+P1P2_45121+5230	50
AKAP9+DCTN1_P1P2+P1P2_45122+5225	104
AKAP9+DCTN1_P1P2+P1P2_45122+5229	107
AKAP9+DCTN1_P1P2+P1P2_45122+5230	80
AKAP9+DCTN1_P1P2+P1P2_45130+5225	657
AKAP9+DCTN1_P1P2+P1P2_45130+5229	454
AKAP9+DCTN1_P1P2+P1P2_45130+5230	477
AKAP9+EIF3A_P1P2+P1P2_5225+53046	37
AKAP9+EIF3A_P1P2+P1P2_5225+53047	299
AKAP9+EIF3A_P1P2+P1P2_5225+53050	476
AKAP9+EIF3A_P1P2+P1P2_5229+53046	29
AKAP9+EIF3A_P1P2+P1P2_5229+53047	274
AKAP9+EIF3A_P1P2+P1P2_5229+53050	329
AKAP9+EIF3A_P1P2+P1P2_5230+53046	33
AKAP9+EIF3A_P1P2+P1P2_5230+53047	216
AKAP9+EIF3A_P1P2+P1P2_5230+53050	440
AKAP9+EIF3D_P1P2+P1P2_5225+53082	74
AKAP9+EIF3D_P1P2+P1P2_5225+53087	44
AKAP9+EIF3D_P1P2+P1P2_5225+53090	111
AKAP9+EIF3D_P1P2+P1P2_5229+53082	38
AKAP9+EIF3D_P1P2+P1P2_5229+53087	33
AKAP9+EIF3D_P1P2+P1P2_5229+53090	83
AKAP9+EIF3D_P1P2+P1P2_5230+53082	33
AKAP9+EIF3D_P1P2+P1P2_5230+53087	19
AKAP9+EIF3D_P1P2+P1P2_5230+53090	98
AKAP9+EIF3H_P1P2+P1P2_5225+53121	60
AKAP9+EIF3H_P1P2+P1P2_5225+53124	108
AKAP9+EIF3H_P1P2+P1P2_5225+53128	93
AKAP9+EIF3H_P1P2+P1P2_5229+53121	46
AKAP9+EIF3H_P1P2+P1P2_5229+53124	160
AKAP9+EIF3H_P1P2+P1P2_5229+53128	26
AKAP9+EIF3H_P1P2+P1P2_5230+53121	23
AKAP9+EIF3H_P1P2+P1P2_5230+53124	76
AKAP9+EIF3H_P1P2+P1P2_5230+53128	81
AKAP9+EIF3L_P1P2+P1P2_5225+53161	630
AKAP9+EIF3L_P1P2+P1P2_5225+53164	473
AKAP9+EIF3L_P1P2+P1P2_5225+53165	555
AKAP9+EIF3L_P1P2+P1P2_5229+53161	393
AKAP9+EIF3L_P1P2+P1P2_5229+53164	385
AKAP9+EIF3L_P1P2+P1P2_5229+53165	536
AKAP9+EIF3L_P1P2+P1P2_5230+53161	320
AKAP9+EIF3L_P1P2+P1P2_5230+53164	376
AKAP9+EIF3L_P1P2+P1P2_5230+53165	427
AKAP9+EIF6_P1P2+P1P2_5225+53432	57
AKAP9+EIF6_P1P2+P1P2_5225+53433	281
AKAP9+EIF6_P1P2+P1P2_5225+53434	282
AKAP9+EIF6_P1P2+P1P2_5229+53432	104
AKAP9+EIF6_P1P2+P1P2_5229+53433	192
AKAP9+EIF6_P1P2+P1P2_5229+53434	276
AKAP9+EIF6_P1P2+P1P2_5230+53432	28
AKAP9+EIF6_P1P2+P1P2_5230+53433	211
AKAP9+EIF6_P1P2+P1P2_5230+53434	207
AKAP9+ERP44_P1P2+P1P2_5225+55852	841
AKAP9+ERP44_P1P2+P1P2_5225+55853	596
AKAP9+ERP44_P1P2+P1P2_5225+55856	753
AKAP9+ERP44_P1P2+P1P2_5229+55852	641
AKAP9+ERP44_P1P2+P1P2_5229+55853	485
AKAP9+ERP44_P1P2+P1P2_5229+55856	609
AKAP9+ERP44_P1P2+P1P2_5230+55852	672
AKAP9+ERP44_P1P2+P1P2_5230+55853	391
AKAP9+ERP44_P1P2+P1P2_5230+55856	618
AKAP9+GET4_P1P2+P1P2_5225+68261	624
AKAP9+GET4_P1P2+P1P2_5225+68262	645
AKAP9+GET4_P1P2+P1P2_5225+68263	803
AKAP9+GET4_P1P2+P1P2_5229+68261	596
AKAP9+GET4_P1P2+P1P2_5229+68262	648
AKAP9+GET4_P1P2+P1P2_5229+68263	763
AKAP9+GET4_P1P2+P1P2_5230+68261	589
AKAP9+GET4_P1P2+P1P2_5230+68262	441
AKAP9+GET4_P1P2+P1P2_5230+68263	475
AKAP9+GMDS_P1P2+P1P2_5225+69971	876
AKAP9+GMDS_P1P2+P1P2_5225+69973	632
AKAP9+GMDS_P1P2+P1P2_5225+69979	557
AKAP9+GMDS_P1P2+P1P2_5229+69971	557
AKAP9+GMDS_P1P2+P1P2_5229+69973	696
AKAP9+GMDS_P1P2+P1P2_5229+69979	591
AKAP9+GMDS_P1P2+P1P2_5230+69971	370
AKAP9+GMDS_P1P2+P1P2_5230+69973	408
AKAP9+GMDS_P1P2+P1P2_5230+69979	526
AKAP9+GOLIM4_P1P2+P1P2_5225+70816	714
AKAP9+GOLIM4_P1P2+P1P2_5225+70817	738
AKAP9+GOLIM4_P1P2+P1P2_5225+70818	701
AKAP9+GOLIM4_P1P2+P1P2_5229+70816	559
AKAP9+GOLIM4_P1P2+P1P2_5229+70817	876
AKAP9+GOLIM4_P1P2+P1P2_5229+70818	528
AKAP9+GOLIM4_P1P2+P1P2_5230+70816	376
AKAP9+GOLIM4_P1P2+P1P2_5230+70817	722
AKAP9+GOLIM4_P1P2+P1P2_5230+70818	507
AKAP9+HNRNPK_P1P2+P1P2_5225+78784	304
AKAP9+HNRNPK_P1P2+P1P2_5225+78785	172
AKAP9+HNRNPK_P1P2+P1P2_5225+78786	116
AKAP9+HNRNPK_P1P2+P1P2_5229+78784	268
AKAP9+HNRNPK_P1P2+P1P2_5229+78785	233
AKAP9+HNRNPK_P1P2+P1P2_5229+78786	57
AKAP9+HNRNPK_P1P2+P1P2_5230+78784	265
AKAP9+HNRNPK_P1P2+P1P2_5230+78785	241
AKAP9+HNRNPK_P1P2+P1P2_5230+78786	65
AKAP9+IFFO1_P1+P1P2_5225+81592	606
AKAP9+IFFO1_P1+P1P2_5225+81594	998
AKAP9+IFFO1_P1+P1P2_5225+81595	99
AKAP9+IFFO1_P1+P1P2_5229+81592	412
AKAP9+IFFO1_P1+P1P2_5229+81594	666
AKAP9+IFFO1_P1+P1P2_5229+81595	121
AKAP9+IFFO1_P1+P1P2_5230+81592	595
AKAP9+IFFO1_P1+P1P2_5230+81594	491
AKAP9+IFFO1_P1+P1P2_5230+81595	77
AKAP9+KDM1A_P1P2+P1P2_5225+88511	81
AKAP9+KDM1A_P1P2+P1P2_5225+88513	67
AKAP9+KDM1A_P1P2+P1P2_5225+88515	244
AKAP9+KDM1A_P1P2+P1P2_5229+88511	83
AKAP9+KDM1A_P1P2+P1P2_5229+88513	105
AKAP9+KDM1A_P1P2+P1P2_5229+88515	244
AKAP9+KDM1A_P1P2+P1P2_5230+88511	34
AKAP9+KDM1A_P1P2+P1P2_5230+88513	112
AKAP9+KDM1A_P1P2+P1P2_5230+88515	166
AKAP9+MGAT5_P1P2+P1P2_105113+5225	654
AKAP9+MGAT5_P1P2+P1P2_105113+5229	547
AKAP9+MGAT5_P1P2+P1P2_105113+5230	388
AKAP9+MGAT5_P1P2+P1P2_105114+5225	775
AKAP9+MGAT5_P1P2+P1P2_105114+5229	887
AKAP9+MGAT5_P1P2+P1P2_105114+5230	533
AKAP9+MGAT5_P1P2+P1P2_105119+5225	547
AKAP9+MGAT5_P1P2+P1P2_105119+5229	779
AKAP9+MGAT5_P1P2+P1P2_105119+5230	450
AKAP9+MRPL51_P1P2+P1P2_108171+5225	290
AKAP9+MRPL51_P1P2+P1P2_108171+5229	265
AKAP9+MRPL51_P1P2+P1P2_108171+5230	188
AKAP9+MRPL51_P1P2+P1P2_108173+5225	73
AKAP9+MRPL51_P1P2+P1P2_108173+5229	29
AKAP9+MRPL51_P1P2+P1P2_108173+5230	30
AKAP9+MRPL51_P1P2+P1P2_108180+5225	192
AKAP9+MRPL51_P1P2+P1P2_108180+5229	176
AKAP9+MRPL51_P1P2+P1P2_108180+5230	118
AKAP9+MRPL54_P1P2+P1P2_108201+5225	151
AKAP9+MRPL54_P1P2+P1P2_108201+5229	189
AKAP9+MRPL54_P1P2+P1P2_108201+5230	113
AKAP9+MRPL54_P1P2+P1P2_108202+5225	237
AKAP9+MRPL54_P1P2+P1P2_108202+5229	180
AKAP9+MRPL54_P1P2+P1P2_108202+5230	189
AKAP9+MRPL54_P1P2+P1P2_108203+5225	156
AKAP9+MRPL54_P1P2+P1P2_108203+5229	142
AKAP9+MRPL54_P1P2+P1P2_108203+5230	99
AKAP9+MYBL2_P1P2+P1P2_110503+5225	52
AKAP9+MYBL2_P1P2+P1P2_110503+5229	20
AKAP9+MYBL2_P1P2+P1P2_110503+5230	25
AKAP9+MYBL2_P1P2+P1P2_110504+5225	166
AKAP9+MYBL2_P1P2+P1P2_110504+5229	154
AKAP9+MYBL2_P1P2+P1P2_110504+5230	98
AKAP9+MYBL2_P1P2+P1P2_110508+5225	120
AKAP9+MYBL2_P1P2+P1P2_110508+5229	85
AKAP9+MYBL2_P1P2+P1P2_110508+5230	39
AKAP9+NAA25_P1P2+P1P2_111815+5225	38
AKAP9+NAA25_P1P2+P1P2_111815+5229	77
AKAP9+NAA25_P1P2+P1P2_111815+5230	30
AKAP9+NAA25_P1P2+P1P2_111818+5225	179
AKAP9+NAA25_P1P2+P1P2_111818+5229	138
AKAP9+NAA25_P1P2+P1P2_111818+5230	233
AKAP9+NAA25_P1P2+P1P2_111819+5225	112
AKAP9+NAA25_P1P2+P1P2_111819+5229	95
AKAP9+NAA25_P1P2+P1P2_111819+5230	99
AKAP9+PPP1R8_P1P2+P1P2_137244+5225	242
AKAP9+PPP1R8_P1P2+P1P2_137244+5229	144
AKAP9+PPP1R8_P1P2+P1P2_137244+5230	162
AKAP9+PPP1R8_P1P2+P1P2_137245+5225	115
AKAP9+PPP1R8_P1P2+P1P2_137245+5229	88
AKAP9+PPP1R8_P1P2+P1P2_137245+5230	40
AKAP9+PPP1R8_P1P2+P1P2_137246+5225	244
AKAP9+PPP1R8_P1P2+P1P2_137246+5229	220
AKAP9+PPP1R8_P1P2+P1P2_137246+5230	281
AKAP9+PRPF39_P1P2+P1P2_139311+5225	232
AKAP9+PRPF39_P1P2+P1P2_139311+5229	167
AKAP9+PRPF39_P1P2+P1P2_139311+5230	170
AKAP9+PRPF39_P1P2+P1P2_139314+5225	247
AKAP9+PRPF39_P1P2+P1P2_139314+5229	126
AKAP9+PRPF39_P1P2+P1P2_139314+5230	222
AKAP9+PRPF39_P1P2+P1P2_139317+5225	144
AKAP9+PRPF39_P1P2+P1P2_139317+5229	111
AKAP9+PRPF39_P1P2+P1P2_139317+5230	90
AKAP9+PSMA7_P1P2+P1P2_140543+5225	28
AKAP9+PSMA7_P1P2+P1P2_140543+5229	142
AKAP9+PSMA7_P1P2+P1P2_140543+5230	71
AKAP9+PSMA7_P1P2+P1P2_140545+5225	129
AKAP9+PSMA7_P1P2+P1P2_140545+5229	123
AKAP9+PSMA7_P1P2+P1P2_140545+5230	60
AKAP9+PSMA7_P1P2+P1P2_140550+5225	72
AKAP9+PSMA7_P1P2+P1P2_140550+5229	87
AKAP9+PSMA7_P1P2+P1P2_140550+5230	12
AKAP9+PSMB6_P1+P1P2_140631+5225	48
AKAP9+PSMB6_P1+P1P2_140631+5229	99
AKAP9+PSMB6_P1+P1P2_140631+5230	28
AKAP9+PSMB6_P1+P1P2_140632+5225	31
AKAP9+PSMB6_P1+P1P2_140632+5229	22
AKAP9+PSMB6_P1+P1P2_140632+5230	16
AKAP9+PSMB6_P1+P1P2_140633+5225	45
AKAP9+PSMB6_P1+P1P2_140633+5229	15
AKAP9+PSMB6_P1+P1P2_140633+5230	27
AKAP9+PSMC1_P1P2+P1P2_140694+5225	95
AKAP9+PSMC1_P1P2+P1P2_140694+5229	80
AKAP9+PSMC1_P1P2+P1P2_140694+5230	125
AKAP9+PSMC1_P1P2+P1P2_140698+5225	117
AKAP9+PSMC1_P1P2+P1P2_140698+5229	176
AKAP9+PSMC1_P1P2+P1P2_140698+5230	129
AKAP9+PSMC1_P1P2+P1P2_140699+5225	297
AKAP9+PSMC1_P1P2+P1P2_140699+5229	349
AKAP9+PSMC1_P1P2+P1P2_140699+5230	274
AKAP9+PSMC6_P1P2+P1P2_140752+5225	156
AKAP9+PSMC6_P1P2+P1P2_140752+5229	174
AKAP9+PSMC6_P1P2+P1P2_140752+5230	164
AKAP9+PSMC6_P1P2+P1P2_140754+5225	78
AKAP9+PSMC6_P1P2+P1P2_140754+5229	91
AKAP9+PSMC6_P1P2+P1P2_140754+5230	51
AKAP9+PSMC6_P1P2+P1P2_140756+5225	109
AKAP9+PSMC6_P1P2+P1P2_140756+5229	87
AKAP9+PSMC6_P1P2+P1P2_140756+5230	45
AKAP9+PSMD11_P1P2+P1P2_140781+5225	184
AKAP9+PSMD11_P1P2+P1P2_140781+5229	181
AKAP9+PSMD11_P1P2+P1P2_140781+5230	98
AKAP9+PSMD11_P1P2+P1P2_140782+5225	14
AKAP9+PSMD11_P1P2+P1P2_140782+5229	93
AKAP9+PSMD11_P1P2+P1P2_140782+5230	79
AKAP9+PSMD11_P1P2+P1P2_140783+5225	72
AKAP9+PSMD11_P1P2+P1P2_140783+5229	86
AKAP9+PSMD11_P1P2+P1P2_140783+5230	54
AKAP9+PSMD1_P1P2+P1P2_140762+5225	57
AKAP9+PSMD1_P1P2+P1P2_140762+5229	88
AKAP9+PSMD1_P1P2+P1P2_140762+5230	17
AKAP9+PSMD1_P1P2+P1P2_140765+5225	543
AKAP9+PSMD1_P1P2+P1P2_140765+5229	462
AKAP9+PSMD1_P1P2+P1P2_140765+5230	430
AKAP9+PSMD1_P1P2+P1P2_140766+5225	678
AKAP9+PSMD1_P1P2+P1P2_140766+5229	462
AKAP9+PSMD1_P1P2+P1P2_140766+5230	402
AKAP9+PSMD2_P1P2+P1P2_140827+5225	44
AKAP9+PSMD2_P1P2+P1P2_140827+5229	51
AKAP9+PSMD2_P1P2+P1P2_140827+5230	35
AKAP9+PSMD2_P1P2+P1P2_140829+5225	466
AKAP9+PSMD2_P1P2+P1P2_140829+5229	535
AKAP9+PSMD2_P1P2+P1P2_140829+5230	270
AKAP9+PSMD2_P1P2+P1P2_140830+5225	339
AKAP9+PSMD2_P1P2+P1P2_140830+5229	213
AKAP9+PSMD2_P1P2+P1P2_140830+5230	156
AKAP9+PSMD3_P1P2+P1P2_140835+5225	24
AKAP9+PSMD3_P1P2+P1P2_140835+5229	60
AKAP9+PSMD3_P1P2+P1P2_140835+5230	35
AKAP9+PSMD3_P1P2+P1P2_140836+5225	180
AKAP9+PSMD3_P1P2+P1P2_140836+5229	223
AKAP9+PSMD3_P1P2+P1P2_140836+5230	80
AKAP9+PSMD3_P1P2+P1P2_140837+5225	81
AKAP9+PSMD3_P1P2+P1P2_140837+5229	75
AKAP9+PSMD3_P1P2+P1P2_140837+5230	96
AKAP9+PTPN1_P1P2+P1P2_141802+5225	200
AKAP9+PTPN1_P1P2+P1P2_141802+5229	229
AKAP9+PTPN1_P1P2+P1P2_141802+5230	182
AKAP9+PTPN1_P1P2+P1P2_141809+5225	142
AKAP9+PTPN1_P1P2+P1P2_141809+5229	191
AKAP9+PTPN1_P1P2+P1P2_141809+5230	136
AKAP9+PTPN1_P1P2+P1P2_141810+5225	416
AKAP9+PTPN1_P1P2+P1P2_141810+5229	395
AKAP9+PTPN1_P1P2+P1P2_141810+5230	240
AKAP9+RAB14_P1P2+P1P2_143241+5225	554
AKAP9+RAB14_P1P2+P1P2_143241+5229	525
AKAP9+RAB14_P1P2+P1P2_143241+5230	323
AKAP9+RAB14_P1P2+P1P2_143243+5225	978
AKAP9+RAB14_P1P2+P1P2_143243+5229	715
AKAP9+RAB14_P1P2+P1P2_143243+5230	570
AKAP9+RAB14_P1P2+P1P2_143246+5225	1397
AKAP9+RAB14_P1P2+P1P2_143246+5229	970
AKAP9+RAB14_P1P2+P1P2_143246+5230	923
AKAP9+RAD21_P1P2+P1P2_144081+5225	239
AKAP9+RAD21_P1P2+P1P2_144081+5229	176
AKAP9+RAD21_P1P2+P1P2_144081+5230	269
AKAP9+RAD21_P1P2+P1P2_144082+5225	383
AKAP9+RAD21_P1P2+P1P2_144082+5229	405
AKAP9+RAD21_P1P2+P1P2_144082+5230	312
AKAP9+RAD21_P1P2+P1P2_144087+5225	130
AKAP9+RAD21_P1P2+P1P2_144087+5229	112
AKAP9+RAD21_P1P2+P1P2_144087+5230	122
AKAP9+RPL35A_P1P2+P1P2_150911+5225	55
AKAP9+RPL35A_P1P2+P1P2_150911+5229	52
AKAP9+RPL35A_P1P2+P1P2_150911+5230	49
AKAP9+RPL35A_P1P2+P1P2_150913+5225	177
AKAP9+RPL35A_P1P2+P1P2_150913+5229	170
AKAP9+RPL35A_P1P2+P1P2_150913+5230	82
AKAP9+RPL35A_P1P2+P1P2_150919+5225	116
AKAP9+RPL35A_P1P2+P1P2_150919+5229	55
AKAP9+RPL35A_P1P2+P1P2_150919+5230	11
AKAP9+RPL35_P1P2+P1P2_150904+5225	733
AKAP9+RPL35_P1P2+P1P2_150904+5229	680
AKAP9+RPL35_P1P2+P1P2_150904+5230	589
AKAP9+RPL35_P1P2+P1P2_150905+5225	150
AKAP9+RPL35_P1P2+P1P2_150905+5229	148
AKAP9+RPL35_P1P2+P1P2_150905+5230	124
AKAP9+RPL35_P1P2+P1P2_150909+5225	269
AKAP9+RPL35_P1P2+P1P2_150909+5229	166
AKAP9+RPL35_P1P2+P1P2_150909+5230	114
AKAP9+RPL4_P1P2+P1P2_151021+5225	135
AKAP9+RPL4_P1P2+P1P2_151021+5229	43
AKAP9+RPL4_P1P2+P1P2_151021+5230	46
AKAP9+RPL4_P1P2+P1P2_151025+5225	115
AKAP9+RPL4_P1P2+P1P2_151025+5229	98
AKAP9+RPL4_P1P2+P1P2_151025+5230	31
AKAP9+RPL4_P1P2+P1P2_151030+5225	48
AKAP9+RPL4_P1P2+P1P2_151030+5229	134
AKAP9+RPL4_P1P2+P1P2_151030+5230	80
AKAP9+RPL7L1_P1P2+P1P2_151088+5225	189
AKAP9+RPL7L1_P1P2+P1P2_151088+5229	80
AKAP9+RPL7L1_P1P2+P1P2_151088+5230	165
AKAP9+RPL7L1_P1P2+P1P2_151089+5225	114
AKAP9+RPL7L1_P1P2+P1P2_151089+5229	90
AKAP9+RPL7L1_P1P2+P1P2_151089+5230	70
AKAP9+RPL7L1_P1P2+P1P2_151090+5225	33
AKAP9+RPL7L1_P1P2+P1P2_151090+5229	29
AKAP9+RPL7L1_P1P2+P1P2_151090+5230	54
AKAP9+RPS6_P1P2+P1P2_151611+5225	30
AKAP9+RPS6_P1P2+P1P2_151611+5229	31
AKAP9+RPS6_P1P2+P1P2_151611+5230	36
AKAP9+RPS6_P1P2+P1P2_151619+5225	89
AKAP9+RPS6_P1P2+P1P2_151619+5229	66
AKAP9+RPS6_P1P2+P1P2_151619+5230	30
AKAP9+RPS6_P1P2+P1P2_151620+5225	68
AKAP9+RPS6_P1P2+P1P2_151620+5229	33
AKAP9+RPS6_P1P2+P1P2_151620+5230	72
AKAP9+RRM1_P1P2+P1P2_151953+5225	16
AKAP9+RRM1_P1P2+P1P2_151953+5229	16
AKAP9+RRM1_P1P2+P1P2_151953+5230	25
AKAP9+RRM1_P1P2+P1P2_151954+5225	68
AKAP9+RRM1_P1P2+P1P2_151954+5229	42
AKAP9+RRM1_P1P2+P1P2_151954+5230	8
AKAP9+RRM1_P1P2+P1P2_151959+5225	90
AKAP9+RRM1_P1P2+P1P2_151959+5229	43
AKAP9+RRM1_P1P2+P1P2_151959+5230	41
AKAP9+RRS1_P1P2+P1P2_152084+5225	37
AKAP9+RRS1_P1P2+P1P2_152084+5229	50
AKAP9+RRS1_P1P2+P1P2_152084+5230	36
AKAP9+RRS1_P1P2+P1P2_152086+5225	38
AKAP9+RRS1_P1P2+P1P2_152086+5229	49
AKAP9+RRS1_P1P2+P1P2_152086+5230	42
AKAP9+RRS1_P1P2+P1P2_152090+5225	99
AKAP9+RRS1_P1P2+P1P2_152090+5229	14
AKAP9+RRS1_P1P2+P1P2_152090+5230	102
AKAP9+RTF1_P1P2+P1P2_152461+5225	76
AKAP9+RTF1_P1P2+P1P2_152461+5229	99
AKAP9+RTF1_P1P2+P1P2_152461+5230	47
AKAP9+RTF1_P1P2+P1P2_152462+5225	70
AKAP9+RTF1_P1P2+P1P2_152462+5229	106
AKAP9+RTF1_P1P2+P1P2_152462+5230	45
AKAP9+RTF1_P1P2+P1P2_152466+5225	63
AKAP9+RTF1_P1P2+P1P2_152466+5229	65
AKAP9+RTF1_P1P2+P1P2_152466+5230	26
AKAP9+SAMM50_P1P2+P1P2_153753+5225	24
AKAP9+SAMM50_P1P2+P1P2_153753+5229	64
AKAP9+SAMM50_P1P2+P1P2_153753+5230	46
AKAP9+SAMM50_P1P2+P1P2_153755+5225	82
AKAP9+SAMM50_P1P2+P1P2_153755+5229	68
AKAP9+SAMM50_P1P2+P1P2_153755+5230	66
AKAP9+SAMM50_P1P2+P1P2_153759+5225	43
AKAP9+SAMM50_P1P2+P1P2_153759+5229	54
AKAP9+SAMM50_P1P2+P1P2_153759+5230	57
AKAP9+SARS_P1P2+P1P2_153918+5225	580
AKAP9+SARS_P1P2+P1P2_153918+5229	498
AKAP9+SARS_P1P2+P1P2_153918+5230	366
AKAP9+SARS_P1P2+P1P2_153919+5225	68
AKAP9+SARS_P1P2+P1P2_153919+5229	67
AKAP9+SARS_P1P2+P1P2_153919+5230	83
AKAP9+SARS_P1P2+P1P2_153920+5225	151
AKAP9+SARS_P1P2+P1P2_153920+5229	31
AKAP9+SARS_P1P2+P1P2_153920+5230	43
AKAP9+SCFD1_P1P2+P1P2_154422+5225	51
AKAP9+SCFD1_P1P2+P1P2_154422+5229	47
AKAP9+SCFD1_P1P2+P1P2_154422+5230	40
AKAP9+SCFD1_P1P2+P1P2_154424+5225	159
AKAP9+SCFD1_P1P2+P1P2_154424+5229	145
AKAP9+SCFD1_P1P2+P1P2_154424+5230	130
AKAP9+SCFD1_P1P2+P1P2_154425+5225	61
AKAP9+SCFD1_P1P2+P1P2_154425+5229	54
AKAP9+SCFD1_P1P2+P1P2_154425+5230	58
AKAP9+SEC22B_P1P2+P1P2_155541+5225	214
AKAP9+SEC22B_P1P2+P1P2_155541+5229	150
AKAP9+SEC22B_P1P2+P1P2_155541+5230	93
AKAP9+SEC22B_P1P2+P1P2_155545+5225	26
AKAP9+SEC22B_P1P2+P1P2_155545+5229	93
AKAP9+SEC22B_P1P2+P1P2_155545+5230	33
AKAP9+SEC22B_P1P2+P1P2_155549+5225	221
AKAP9+SEC22B_P1P2+P1P2_155549+5229	212
AKAP9+SEC22B_P1P2+P1P2_155549+5230	94
AKAP9+SEC23B_P1P2+P1P2_155571+5225	764
AKAP9+SEC23B_P1P2+P1P2_155571+5229	770
AKAP9+SEC23B_P1P2+P1P2_155571+5230	498
AKAP9+SEC23B_P1P2+P1P2_155572+5225	824
AKAP9+SEC23B_P1P2+P1P2_155572+5229	652
AKAP9+SEC23B_P1P2+P1P2_155572+5230	542
AKAP9+SEC23B_P1P2+P1P2_155573+5225	661
AKAP9+SEC23B_P1P2+P1P2_155573+5229	532
AKAP9+SEC23B_P1P2+P1P2_155573+5230	333
AKAP9+SEC23IP_P1P2+P1P2_155583+5225	448
AKAP9+SEC23IP_P1P2+P1P2_155583+5229	618
AKAP9+SEC23IP_P1P2+P1P2_155583+5230	385
AKAP9+SEC23IP_P1P2+P1P2_155585+5225	817
AKAP9+SEC23IP_P1P2+P1P2_155585+5229	683
AKAP9+SEC23IP_P1P2+P1P2_155585+5230	722
AKAP9+SEC23IP_P1P2+P1P2_155586+5225	1599
AKAP9+SEC23IP_P1P2+P1P2_155586+5229	1470
AKAP9+SEC23IP_P1P2+P1P2_155586+5230	1457
AKAP9+SEC24A_P1P2+P1P2_155592+5225	742
AKAP9+SEC24A_P1P2+P1P2_155592+5229	533
AKAP9+SEC24A_P1P2+P1P2_155592+5230	603
AKAP9+SEC24A_P1P2+P1P2_155593+5225	417
AKAP9+SEC24A_P1P2+P1P2_155593+5229	321
AKAP9+SEC24A_P1P2+P1P2_155593+5230	275
AKAP9+SEC24A_P1P2+P1P2_155595+5225	790
AKAP9+SEC24A_P1P2+P1P2_155595+5229	536
AKAP9+SEC24A_P1P2+P1P2_155595+5230	517
AKAP9+SEC24B_P1P2+P1P2_155604+5225	533
AKAP9+SEC24B_P1P2+P1P2_155604+5229	756
AKAP9+SEC24B_P1P2+P1P2_155604+5230	443
AKAP9+SEC24B_P1P2+P1P2_155605+5225	343
AKAP9+SEC24B_P1P2+P1P2_155605+5229	356
AKAP9+SEC24B_P1P2+P1P2_155605+5230	258
AKAP9+SEC24B_P1P2+P1P2_155608+5225	751
AKAP9+SEC24B_P1P2+P1P2_155608+5229	517
AKAP9+SEC24B_P1P2+P1P2_155608+5230	560
AKAP9+SEC24C_P1P2+P1P2_155612+5225	731
AKAP9+SEC24C_P1P2+P1P2_155612+5229	581
AKAP9+SEC24C_P1P2+P1P2_155612+5230	562
AKAP9+SEC24C_P1P2+P1P2_155613+5225	552
AKAP9+SEC24C_P1P2+P1P2_155613+5229	475
AKAP9+SEC24C_P1P2+P1P2_155613+5230	348
AKAP9+SEC24C_P1P2+P1P2_155617+5225	651
AKAP9+SEC24C_P1P2+P1P2_155617+5229	410
AKAP9+SEC24C_P1P2+P1P2_155617+5230	442
AKAP9+SF3A1_P1+P1P2_157341+5225	38
AKAP9+SF3A1_P1+P1P2_157341+5229	8
AKAP9+SF3A1_P1+P1P2_157341+5230	13
AKAP9+SF3A1_P1+P1P2_157342+5225	32
AKAP9+SF3A1_P1+P1P2_157342+5229	33
AKAP9+SF3A1_P1+P1P2_157342+5230	20
AKAP9+SF3A1_P1+P1P2_157347+5225	154
AKAP9+SF3A1_P1+P1P2_157347+5229	130
AKAP9+SF3A1_P1+P1P2_157347+5230	174
AKAP9+SF3B2_P1P2+P1P2_157412+5225	91
AKAP9+SF3B2_P1P2+P1P2_157412+5229	42
AKAP9+SF3B2_P1P2+P1P2_157412+5230	45
AKAP9+SF3B2_P1P2+P1P2_157417+5225	99
AKAP9+SF3B2_P1P2+P1P2_157417+5229	142
AKAP9+SF3B2_P1P2+P1P2_157417+5230	102
AKAP9+SF3B2_P1P2+P1P2_157420+5225	155
AKAP9+SF3B2_P1P2+P1P2_157420+5229	96
AKAP9+SF3B2_P1P2+P1P2_157420+5230	61
AKAP9+SGTA_P1P2+P1P2_158011+5225	982
AKAP9+SGTA_P1P2+P1P2_158011+5229	851
AKAP9+SGTA_P1P2+P1P2_158011+5230	816
AKAP9+SGTA_P1P2+P1P2_158013+5225	606
AKAP9+SGTA_P1P2+P1P2_158013+5229	519
AKAP9+SGTA_P1P2+P1P2_158013+5230	496
AKAP9+SGTA_P1P2+P1P2_158019+5225	589
AKAP9+SGTA_P1P2+P1P2_158019+5229	774
AKAP9+SGTA_P1P2+P1P2_158019+5230	554
AKAP9+SMC3_P1P2+P1P2_164524+5225	369
AKAP9+SMC3_P1P2+P1P2_164524+5229	253
AKAP9+SMC3_P1P2+P1P2_164524+5230	297
AKAP9+SMC3_P1P2+P1P2_164528+5225	136
AKAP9+SMC3_P1P2+P1P2_164528+5229	83
AKAP9+SMC3_P1P2+P1P2_164528+5230	32
AKAP9+SMC3_P1P2+P1P2_164530+5225	80
AKAP9+SMC3_P1P2+P1P2_164530+5229	71
AKAP9+SMC3_P1P2+P1P2_164530+5230	56
AKAP9+SNRPD3_P1P2+P1P2_165672+5225	154
AKAP9+SNRPD3_P1P2+P1P2_165672+5229	97
AKAP9+SNRPD3_P1P2+P1P2_165672+5230	56
AKAP9+SNRPD3_P1P2+P1P2_165675+5225	90
AKAP9+SNRPD3_P1P2+P1P2_165675+5229	37
AKAP9+SNRPD3_P1P2+P1P2_165675+5230	6
AKAP9+SNRPD3_P1P2+P1P2_165677+5225	116
AKAP9+SNRPD3_P1P2+P1P2_165677+5229	32
AKAP9+SNRPD3_P1P2+P1P2_165677+5230	30
AKAP9+SON_P1+P1P2_166333+5225	83
AKAP9+SON_P1+P1P2_166333+5229	30
AKAP9+SON_P1+P1P2_166333+5230	36
AKAP9+SON_P1+P1P2_166335+5225	30
AKAP9+SON_P1+P1P2_166335+5229	67
AKAP9+SON_P1+P1P2_166335+5230	12
AKAP9+SON_P1+P1P2_166338+5225	122
AKAP9+SON_P1+P1P2_166338+5229	175
AKAP9+SON_P1+P1P2_166338+5230	47
AKAP9+SPATA5L1_P1P2+P1P2_167432+5225	136
AKAP9+SPATA5L1_P1P2+P1P2_167432+5229	181
AKAP9+SPATA5L1_P1P2+P1P2_167432+5230	62
AKAP9+SPATA5L1_P1P2+P1P2_167433+5225	168
AKAP9+SPATA5L1_P1P2+P1P2_167433+5229	91
AKAP9+SPATA5L1_P1P2+P1P2_167433+5230	132
AKAP9+SPATA5L1_P1P2+P1P2_167437+5225	47
AKAP9+SPATA5L1_P1P2+P1P2_167437+5229	103
AKAP9+SPATA5L1_P1P2+P1P2_167437+5230	32
AKAP9+SPCS3_P1+P1P2_167592+5225	75
AKAP9+SPCS3_P1+P1P2_167592+5229	22
AKAP9+SPCS3_P1+P1P2_167592+5230	48
AKAP9+SPCS3_P1+P1P2_167595+5225	491
AKAP9+SPCS3_P1+P1P2_167595+5229	446
AKAP9+SPCS3_P1+P1P2_167595+5230	281
AKAP9+SPCS3_P1+P1P2_167598+5225	441
AKAP9+SPCS3_P1+P1P2_167598+5229	376
AKAP9+SPCS3_P1+P1P2_167598+5230	387
AKAP9+SPPL3_P1P2+P1P2_168364+5225	764
AKAP9+SPPL3_P1P2+P1P2_168364+5229	695
AKAP9+SPPL3_P1P2+P1P2_168364+5230	470
AKAP9+SPPL3_P1P2+P1P2_168365+5225	491
AKAP9+SPPL3_P1P2+P1P2_168365+5229	359
AKAP9+SPPL3_P1P2+P1P2_168365+5230	417
AKAP9+SPPL3_P1P2+P1P2_168368+5225	852
AKAP9+SPPL3_P1P2+P1P2_168368+5229	604
AKAP9+SPPL3_P1P2+P1P2_168368+5230	453
AKAP9+SRP54_P1P2+P1P2_169152+5225	935
AKAP9+SRP54_P1P2+P1P2_169152+5229	817
AKAP9+SRP54_P1P2+P1P2_169152+5230	606
AKAP9+SRP54_P1P2+P1P2_169154+5225	713
AKAP9+SRP54_P1P2+P1P2_169154+5229	573
AKAP9+SRP54_P1P2+P1P2_169154+5230	296
AKAP9+SRP54_P1P2+P1P2_169157+5225	413
AKAP9+SRP54_P1P2+P1P2_169157+5229	398
AKAP9+SRP54_P1P2+P1P2_169157+5230	279
AKAP9+SRPRB_P1P2+P1P2_169241+5225	41
AKAP9+SRPRB_P1P2+P1P2_169241+5229	60
AKAP9+SRPRB_P1P2+P1P2_169241+5230	46
AKAP9+SRPRB_P1P2+P1P2_169242+5225	28
AKAP9+SRPRB_P1P2+P1P2_169242+5229	74
AKAP9+SRPRB_P1P2+P1P2_169242+5230	51
AKAP9+SRPRB_P1P2+P1P2_169243+5225	207
AKAP9+SRPRB_P1P2+P1P2_169243+5229	223
AKAP9+SRPRB_P1P2+P1P2_169243+5230	112
AKAP9+ST3GAL4_P1P2+P1P2_169993+5225	820
AKAP9+ST3GAL4_P1P2+P1P2_169993+5229	1002
AKAP9+ST3GAL4_P1P2+P1P2_169993+5230	574
AKAP9+ST3GAL4_P1P2+P1P2_169997+5225	1403
AKAP9+ST3GAL4_P1P2+P1P2_169997+5229	1459
AKAP9+ST3GAL4_P1P2+P1P2_169997+5230	844
AKAP9+ST3GAL4_P1P2+P1P2_169998+5225	969
AKAP9+ST3GAL4_P1P2+P1P2_169998+5229	783
AKAP9+ST3GAL4_P1P2+P1P2_169998+5230	537
AKAP9+STX5_P1P2+P1P2_171421+5225	579
[truncated: 47,279 more rows]

## Sheet: Untreated rep 2
0Safe+0Safe_safe+safe_204603.4554+204603.4554	463
0Safe+0Safe_safe+safe_204603.4554+204750.4701	955
0Safe+0Safe_safe+safe_204603.4554+204798.4749	1193
0Safe+0Safe_safe+safe_204603.4554+204895.4846	1038
0Safe+0Safe_safe+safe_204603.4554+205190.5141	1287
0Safe+0Safe_safe+safe_204603.4554+205244.5195	1111
0Safe+0Safe_safe+safe_204603.4554+205896.5847	957
0Safe+0Safe_safe+safe_204603.4554+205926.5877	1310
0Safe+0Safe_safe+safe_204603.4554+206014.5965	1185
0Safe+0Safe_safe+safe_204603.4554+206141.1592	1655
0Safe+0Safe_safe+safe_204603.4554+206175.1626	1417
0Safe+0Safe_safe+safe_204603.4554+206180.1631	1273
0Safe+0Safe_safe+safe_204603.4554+206276.1727	821
0Safe+0Safe_safe+safe_204603.4554+207086.1286	1240
0Safe+0Safe_safe+safe_204603.4554+207133.1333	1205
0Safe+0Safe_safe+safe_204603.4554+207268.1468	882
0Safe+0Safe_safe+safe_204603.4554+207272.1472	1326
0Safe+0Safe_safe+safe_204603.4554+207295.1495	1158
0Safe+0Safe_safe+safe_204603.4554+207412.862	1220
0Safe+0Safe_safe+safe_204603.4554+207644.2345	1473
0Safe+0Safe_safe+safe_204603.4554+207736.2437	1246
0Safe+0Safe_safe+safe_204603.4554+207762.2463	1054
0Safe+0Safe_safe+safe_204603.4554+207933.2634	1124
0Safe+0Safe_safe+safe_204603.4554+208027.2728	1028
0Safe+0Safe_safe+safe_204603.4554+208233.2934	1118
0Safe+0Safe_safe+safe_204603.4554+208249.2950	1121
0Safe+0Safe_safe+safe_204603.4554+208251.2952	1357
0Safe+0Safe_safe+safe_204603.4554+208266.2967	1179
0Safe+0Safe_safe+safe_204603.4554+208280.2981	1460
0Safe+0Safe_safe+safe_204603.4554+208288.2989	1214
0Safe+0Safe_safe+safe_204603.4554+208334.13	1345
0Safe+0Safe_safe+safe_204603.4554+208691.451	1133
0Safe+0Safe_safe+safe_204603.4554+208974.706	1489
0Safe+0Safe_safe+safe_204603.4554+209014.742	993
0Safe+0Safe_safe+safe_204603.4554+209157.3858	1509
0Safe+0Safe_safe+safe_204603.4554+209400.4101	1290
0Safe+0Safe_safe+safe_204603.4554+209597.4298	1180
0Safe+0Safe_safe+safe_204603.4554+209963.3164	1218
0Safe+0Safe_safe+safe_204603.4554+209973.3174	1704
0Safe+0Safe_safe+safe_204603.4554+209990.3191	1110
0Safe+0Safe_safe+safe_204603.4554+210140.3341	1314
0Safe+0Safe_safe+safe_204603.4554+210313.3514	1234
0Safe+0Safe_safe+safe_204603.4554+210540.3741	1352
0Safe+0Safe_safe+safe_204603.4554+210725.6176	1183
0Safe+0Safe_safe+safe_204603.4554+210743.6194	1101
0Safe+0Safe_safe+safe_204603.4554+210809.6260	1007
0Safe+0Safe_safe+safe_204603.4554+210925.6376	871
0Safe+0Safe_safe+safe_204603.4554+210935.6386	981
0Safe+0Safe_safe+safe_204603.4554+210946.6397	1084
0Safe+0Safe_safe+safe_204603.4554+211135.6586	1034
0Safe+0Safe_safe+safe_204750.4701+204750.4701	351
0Safe+0Safe_safe+safe_204750.4701+204798.4749	1254
0Safe+0Safe_safe+safe_204750.4701+204895.4846	695
0Safe+0Safe_safe+safe_204750.4701+205190.5141	1306
0Safe+0Safe_safe+safe_204750.4701+205244.5195	895
0Safe+0Safe_safe+safe_204750.4701+205896.5847	1261
0Safe+0Safe_safe+safe_204750.4701+205926.5877	1096
0Safe+0Safe_safe+safe_204750.4701+206014.5965	955
0Safe+0Safe_safe+safe_204750.4701+206141.1592	1474
0Safe+0Safe_safe+safe_204750.4701+206175.1626	1373
0Safe+0Safe_safe+safe_204750.4701+206180.1631	1384
0Safe+0Safe_safe+safe_204750.4701+206276.1727	1147
0Safe+0Safe_safe+safe_204750.4701+207086.1286	1351
0Safe+0Safe_safe+safe_204750.4701+207133.1333	1292
0Safe+0Safe_safe+safe_204750.4701+207268.1468	669
0Safe+0Safe_safe+safe_204750.4701+207272.1472	1099
0Safe+0Safe_safe+safe_204750.4701+207295.1495	1490
0Safe+0Safe_safe+safe_204750.4701+207412.862	1373
0Safe+0Safe_safe+safe_204750.4701+207644.2345	1153
0Safe+0Safe_safe+safe_204750.4701+207736.2437	1040
0Safe+0Safe_safe+safe_204750.4701+207762.2463	1140
0Safe+0Safe_safe+safe_204750.4701+207933.2634	1122
0Safe+0Safe_safe+safe_204750.4701+208027.2728	1033
0Safe+0Safe_safe+safe_204750.4701+208233.2934	1031
0Safe+0Safe_safe+safe_204750.4701+208249.2950	1075
0Safe+0Safe_safe+safe_204750.4701+208251.2952	1332
0Safe+0Safe_safe+safe_204750.4701+208266.2967	1394
0Safe+0Safe_safe+safe_204750.4701+208280.2981	1545
0Safe+0Safe_safe+safe_204750.4701+208288.2989	1051
0Safe+0Safe_safe+safe_204750.4701+208334.13	1268
0Safe+0Safe_safe+safe_204750.4701+208691.451	1225
0Safe+0Safe_safe+safe_204750.4701+208974.706	1340
0Safe+0Safe_safe+safe_204750.4701+209014.742	992
0Safe+0Safe_safe+safe_204750.4701+209157.3858	1750
0Safe+0Safe_safe+safe_204750.4701+209400.4101	1667
0Safe+0Safe_safe+safe_204750.4701+209597.4298	1146
0Safe+0Safe_safe+safe_204750.4701+209963.3164	1338
0Safe+0Safe_safe+safe_204750.4701+209973.3174	1730
0Safe+0Safe_safe+safe_204750.4701+209990.3191	1405
0Safe+0Safe_safe+safe_204750.4701+210140.3341	1499
0Safe+0Safe_safe+safe_204750.4701+210313.3514	1521
0Safe+0Safe_safe+safe_204750.4701+210540.3741	1536
0Safe+0Safe_safe+safe_204750.4701+210725.6176	1150
0Safe+0Safe_safe+safe_204750.4701+210743.6194	1135
0Safe+0Safe_safe+safe_204750.4701+210809.6260	1097
0Safe+0Safe_safe+safe_204750.4701+210925.6376	1343
0Safe+0Safe_safe+safe_204750.4701+210935.6386	982
0Safe+0Safe_safe+safe_204750.4701+210946.6397	1272
0Safe+0Safe_safe+safe_204750.4701+211135.6586	911
0Safe+0Safe_safe+safe_204798.4749+204798.4749	338
0Safe+0Safe_safe+safe_204798.4749+204895.4846	910
0Safe+0Safe_safe+safe_204798.4749+205190.5141	1092
0Safe+0Safe_safe+safe_204798.4749+205244.5195	1131
0Safe+0Safe_safe+safe_204798.4749+205896.5847	1188
0Safe+0Safe_safe+safe_204798.4749+205926.5877	1092
0Safe+0Safe_safe+safe_204798.4749+206014.5965	1036
0Safe+0Safe_safe+safe_204798.4749+206141.1592	1263
0Safe+0Safe_safe+safe_204798.4749+206175.1626	1369
0Safe+0Safe_safe+safe_204798.4749+206180.1631	1083
0Safe+0Safe_safe+safe_204798.4749+206276.1727	1130
0Safe+0Safe_safe+safe_204798.4749+207086.1286	1272
0Safe+0Safe_safe+safe_204798.4749+207133.1333	1418
0Safe+0Safe_safe+safe_204798.4749+207268.1468	877
0Safe+0Safe_safe+safe_204798.4749+207272.1472	812
0Safe+0Safe_safe+safe_204798.4749+207295.1495	1259
0Safe+0Safe_safe+safe_204798.4749+207412.862	1376
0Safe+0Safe_safe+safe_204798.4749+207644.2345	1224
0Safe+0Safe_safe+safe_204798.4749+207736.2437	1470
0Safe+0Safe_safe+safe_204798.4749+207762.2463	934
0Safe+0Safe_safe+safe_204798.4749+207933.2634	1111
0Safe+0Safe_safe+safe_204798.4749+208027.2728	1068
0Safe+0Safe_safe+safe_204798.4749+208233.2934	1397
0Safe+0Safe_safe+safe_204798.4749+208249.2950	1183
0Safe+0Safe_safe+safe_204798.4749+208251.2952	1241
0Safe+0Safe_safe+safe_204798.4749+208266.2967	1507
0Safe+0Safe_safe+safe_204798.4749+208280.2981	1901
0Safe+0Safe_safe+safe_204798.4749+208288.2989	1463
0Safe+0Safe_safe+safe_204798.4749+208334.13	1554
0Safe+0Safe_safe+safe_204798.4749+208691.451	1276
0Safe+0Safe_safe+safe_204798.4749+208974.706	1434
0Safe+0Safe_safe+safe_204798.4749+209014.742	793
0Safe+0Safe_safe+safe_204798.4749+209157.3858	1732
0Safe+0Safe_safe+safe_204798.4749+209400.4101	1555
0Safe+0Safe_safe+safe_204798.4749+209597.4298	842
0Safe+0Safe_safe+safe_204798.4749+209963.3164	1189
0Safe+0Safe_safe+safe_204798.4749+209973.3174	1779
0Safe+0Safe_safe+safe_204798.4749+209990.3191	1020
0Safe+0Safe_safe+safe_204798.4749+210140.3341	1263
0Safe+0Safe_safe+safe_204798.4749+210313.3514	1002
0Safe+0Safe_safe+safe_204798.4749+210540.3741	1576
0Safe+0Safe_safe+safe_204798.4749+210725.6176	1503
0Safe+0Safe_safe+safe_204798.4749+210743.6194	1076
0Safe+0Safe_safe+safe_204798.4749+210809.6260	990
0Safe+0Safe_safe+safe_204798.4749+210925.6376	983
0Safe+0Safe_safe+safe_204798.4749+210935.6386	1083
0Safe+0Safe_safe+safe_204798.4749+210946.6397	1286
0Safe+0Safe_safe+safe_204798.4749+211135.6586	1206
0Safe+0Safe_safe+safe_204895.4846+204895.4846	423
0Safe+0Safe_safe+safe_204895.4846+205190.5141	1023
0Safe+0Safe_safe+safe_204895.4846+205244.5195	794
0Safe+0Safe_safe+safe_204895.4846+205896.5847	1231
0Safe+0Safe_safe+safe_204895.4846+205926.5877	1061
0Safe+0Safe_safe+safe_204895.4846+206014.5965	727
0Safe+0Safe_safe+safe_204895.4846+206141.1592	1179
0Safe+0Safe_safe+safe_204895.4846+206175.1626	837
0Safe+0Safe_safe+safe_204895.4846+206180.1631	854
0Safe+0Safe_safe+safe_204895.4846+206276.1727	868
0Safe+0Safe_safe+safe_204895.4846+207086.1286	1237
0Safe+0Safe_safe+safe_204895.4846+207133.1333	1098
0Safe+0Safe_safe+safe_204895.4846+207268.1468	652
0Safe+0Safe_safe+safe_204895.4846+207272.1472	881
0Safe+0Safe_safe+safe_204895.4846+207295.1495	1102
0Safe+0Safe_safe+safe_204895.4846+207412.862	893
0Safe+0Safe_safe+safe_204895.4846+207644.2345	975
0Safe+0Safe_safe+safe_204895.4846+207736.2437	1033
0Safe+0Safe_safe+safe_204895.4846+207762.2463	1427
0Safe+0Safe_safe+safe_204895.4846+207933.2634	803
0Safe+0Safe_safe+safe_204895.4846+208027.2728	901
0Safe+0Safe_safe+safe_204895.4846+208233.2934	1118
0Safe+0Safe_safe+safe_204895.4846+208249.2950	965
0Safe+0Safe_safe+safe_204895.4846+208251.2952	971
0Safe+0Safe_safe+safe_204895.4846+208266.2967	764
0Safe+0Safe_safe+safe_204895.4846+208280.2981	1724
0Safe+0Safe_safe+safe_204895.4846+208288.2989	963
0Safe+0Safe_safe+safe_204895.4846+208334.13	1040
0Safe+0Safe_safe+safe_204895.4846+208691.451	999
0Safe+0Safe_safe+safe_204895.4846+208974.706	1318
0Safe+0Safe_safe+safe_204895.4846+209014.742	715
0Safe+0Safe_safe+safe_204895.4846+209157.3858	1152
0Safe+0Safe_safe+safe_204895.4846+209400.4101	1122
0Safe+0Safe_safe+safe_204895.4846+209597.4298	1236
0Safe+0Safe_safe+safe_204895.4846+209963.3164	900
0Safe+0Safe_safe+safe_204895.4846+209973.3174	1431
0Safe+0Safe_safe+safe_204895.4846+209990.3191	893
0Safe+0Safe_safe+safe_204895.4846+210140.3341	1424
0Safe+0Safe_safe+safe_204895.4846+210313.3514	1068
0Safe+0Safe_safe+safe_204895.4846+210540.3741	1009
0Safe+0Safe_safe+safe_204895.4846+210725.6176	864
0Safe+0Safe_safe+safe_204895.4846+210743.6194	860
0Safe+0Safe_safe+safe_204895.4846+210809.6260	1116
0Safe+0Safe_safe+safe_204895.4846+210925.6376	1052
0Safe+0Safe_safe+safe_204895.4846+210935.6386	747
0Safe+0Safe_safe+safe_204895.4846+210946.6397	974
0Safe+0Safe_safe+safe_204895.4846+211135.6586	1147
0Safe+0Safe_safe+safe_205190.5141+205190.5141	309
0Safe+0Safe_safe+safe_205190.5141+205244.5195	879
0Safe+0Safe_safe+safe_205190.5141+205896.5847	1163
0Safe+0Safe_safe+safe_205190.5141+205926.5877	906
0Safe+0Safe_safe+safe_205190.5141+206014.5965	993
0Safe+0Safe_safe+safe_205190.5141+206141.1592	1196
0Safe+0Safe_safe+safe_205190.5141+206175.1626	1078
0Safe+0Safe_safe+safe_205190.5141+206180.1631	1514
0Safe+0Safe_safe+safe_205190.5141+206276.1727	811
0Safe+0Safe_safe+safe_205190.5141+207086.1286	1252
0Safe+0Safe_safe+safe_205190.5141+207133.1333	1562
0Safe+0Safe_safe+safe_205190.5141+207268.1468	738
0Safe+0Safe_safe+safe_205190.5141+207272.1472	995
0Safe+0Safe_safe+safe_205190.5141+207295.1495	990
0Safe+0Safe_safe+safe_205190.5141+207412.862	1096
0Safe+0Safe_safe+safe_205190.5141+207644.2345	1344
0Safe+0Safe_safe+safe_205190.5141+207736.2437	1241
0Safe+0Safe_safe+safe_205190.5141+207762.2463	898
0Safe+0Safe_safe+safe_205190.5141+207933.2634	1067
0Safe+0Safe_safe+safe_205190.5141+208027.2728	1019
0Safe+0Safe_safe+safe_205190.5141+208233.2934	1425
0Safe+0Safe_safe+safe_205190.5141+208249.2950	1192
0Safe+0Safe_safe+safe_205190.5141+208251.2952	1328
0Safe+0Safe_safe+safe_205190.5141+208266.2967	1078
0Safe+0Safe_safe+safe_205190.5141+208280.2981	1647
0Safe+0Safe_safe+safe_205190.5141+208288.2989	1364
0Safe+0Safe_safe+safe_205190.5141+208334.13	1301
0Safe+0Safe_safe+safe_205190.5141+208691.451	1209
0Safe+0Safe_safe+safe_205190.5141+208974.706	1512
0Safe+0Safe_safe+safe_205190.5141+209014.742	1238
0Safe+0Safe_safe+safe_205190.5141+209157.3858	1498
0Safe+0Safe_safe+safe_205190.5141+209400.4101	1550
0Safe+0Safe_safe+safe_205190.5141+209597.4298	992
0Safe+0Safe_safe+safe_205190.5141+209963.3164	854
0Safe+0Safe_safe+safe_205190.5141+209973.3174	1364
0Safe+0Safe_safe+safe_205190.5141+209990.3191	1091
0Safe+0Safe_safe+safe_205190.5141+210140.3341	1382
0Safe+0Safe_safe+safe_205190.5141+210313.3514	885
0Safe+0Safe_safe+safe_205190.5141+210540.3741	1535
0Safe+0Safe_safe+safe_205190.5141+210725.6176	1199
0Safe+0Safe_safe+safe_205190.5141+210743.6194	992
0Safe+0Safe_safe+safe_205190.5141+210809.6260	1094
0Safe+0Safe_safe+safe_205190.5141+210925.6376	955
0Safe+0Safe_safe+safe_205190.5141+210935.6386	1326
0Safe+0Safe_safe+safe_205190.5141+210946.6397	960
0Safe+0Safe_safe+safe_205190.5141+211135.6586	971
0Safe+0Safe_safe+safe_205244.5195+205244.5195	319
0Safe+0Safe_safe+safe_205244.5195+205896.5847	1063
0Safe+0Safe_safe+safe_205244.5195+205926.5877	1221
0Safe+0Safe_safe+safe_205244.5195+206014.5965	1192
0Safe+0Safe_safe+safe_205244.5195+206141.1592	1270
0Safe+0Safe_safe+safe_205244.5195+206175.1626	911
0Safe+0Safe_safe+safe_205244.5195+206180.1631	1348
0Safe+0Safe_safe+safe_205244.5195+206276.1727	1003
0Safe+0Safe_safe+safe_205244.5195+207086.1286	1200
0Safe+0Safe_safe+safe_205244.5195+207133.1333	1580
0Safe+0Safe_safe+safe_205244.5195+207268.1468	708
0Safe+0Safe_safe+safe_205244.5195+207272.1472	1114
0Safe+0Safe_safe+safe_205244.5195+207295.1495	1603
0Safe+0Safe_safe+safe_205244.5195+207412.862	1096
0Safe+0Safe_safe+safe_205244.5195+207644.2345	1470
0Safe+0Safe_safe+safe_205244.5195+207736.2437	1053
0Safe+0Safe_safe+safe_205244.5195+207762.2463	1200
0Safe+0Safe_safe+safe_205244.5195+207933.2634	1102
0Safe+0Safe_safe+safe_205244.5195+208027.2728	1031
0Safe+0Safe_safe+safe_205244.5195+208233.2934	1055
0Safe+0Safe_safe+safe_205244.5195+208249.2950	1365
0Safe+0Safe_safe+safe_205244.5195+208251.2952	960
0Safe+0Safe_safe+safe_205244.5195+208266.2967	1039
0Safe+0Safe_safe+safe_205244.5195+208280.2981	1350
0Safe+0Safe_safe+safe_205244.5195+208288.2989	1552
0Safe+0Safe_safe+safe_205244.5195+208334.13	707
0Safe+0Safe_safe+safe_205244.5195+208691.451	1025
0Safe+0Safe_safe+safe_205244.5195+208974.706	1317
0Safe+0Safe_safe+safe_205244.5195+209014.742	1181
0Safe+0Safe_safe+safe_205244.5195+209157.3858	1328
0Safe+0Safe_safe+safe_205244.5195+209400.4101	972
0Safe+0Safe_safe+safe_205244.5195+209597.4298	1061
0Safe+0Safe_safe+safe_205244.5195+209963.3164	1197
0Safe+0Safe_safe+safe_205244.5195+209973.3174	1762
0Safe+0Safe_safe+safe_205244.5195+209990.3191	891
0Safe+0Safe_safe+safe_205244.5195+210140.3341	1498
0Safe+0Safe_safe+safe_205244.5195+210313.3514	1356
0Safe+0Safe_safe+safe_205244.5195+210540.3741	1596
0Safe+0Safe_safe+safe_205244.5195+210725.6176	1139
0Safe+0Safe_safe+safe_205244.5195+210743.6194	970
0Safe+0Safe_safe+safe_205244.5195+210809.6260	1214
0Safe+0Safe_safe+safe_205244.5195+210925.6376	1073
0Safe+0Safe_safe+safe_205244.5195+210935.6386	962
0Safe+0Safe_safe+safe_205244.5195+210946.6397	1149
0Safe+0Safe_safe+safe_205244.5195+211135.6586	1220
0Safe+0Safe_safe+safe_205896.5847+205896.5847	341
0Safe+0Safe_safe+safe_205896.5847+205926.5877	1101
0Safe+0Safe_safe+safe_205896.5847+206014.5965	1181
0Safe+0Safe_safe+safe_205896.5847+206141.1592	1412
0Safe+0Safe_safe+safe_205896.5847+206175.1626	788
0Safe+0Safe_safe+safe_205896.5847+206180.1631	1123
0Safe+0Safe_safe+safe_205896.5847+206276.1727	946
0Safe+0Safe_safe+safe_205896.5847+207086.1286	1189
0Safe+0Safe_safe+safe_205896.5847+207133.1333	1253
0Safe+0Safe_safe+safe_205896.5847+207268.1468	828
0Safe+0Safe_safe+safe_205896.5847+207272.1472	1061
0Safe+0Safe_safe+safe_205896.5847+207295.1495	943
0Safe+0Safe_safe+safe_205896.5847+207412.862	1010
0Safe+0Safe_safe+safe_205896.5847+207644.2345	1483
0Safe+0Safe_safe+safe_205896.5847+207736.2437	1043
0Safe+0Safe_safe+safe_205896.5847+207762.2463	1214
0Safe+0Safe_safe+safe_205896.5847+207933.2634	909
0Safe+0Safe_safe+safe_205896.5847+208027.2728	783
0Safe+0Safe_safe+safe_205896.5847+208233.2934	843
0Safe+0Safe_safe+safe_205896.5847+208249.2950	1301
0Safe+0Safe_safe+safe_205896.5847+208251.2952	1411
0Safe+0Safe_safe+safe_205896.5847+208266.2967	1438
0Safe+0Safe_safe+safe_205896.5847+208280.2981	1242
0Safe+0Safe_safe+safe_205896.5847+208288.2989	1307
0Safe+0Safe_safe+safe_205896.5847+208334.13	847
0Safe+0Safe_safe+safe_205896.5847+208691.451	1310
0Safe+0Safe_safe+safe_205896.5847+208974.706	1478
0Safe+0Safe_safe+safe_205896.5847+209014.742	1515
0Safe+0Safe_safe+safe_205896.5847+209157.3858	1612
0Safe+0Safe_safe+safe_205896.5847+209400.4101	1201
0Safe+0Safe_safe+safe_205896.5847+209597.4298	1065
0Safe+0Safe_safe+safe_205896.5847+209963.3164	1211
0Safe+0Safe_safe+safe_205896.5847+209973.3174	1584
0Safe+0Safe_safe+safe_205896.5847+209990.3191	1038
0Safe+0Safe_safe+safe_205896.5847+210140.3341	1510
0Safe+0Safe_safe+safe_205896.5847+210313.3514	1127
0Safe+0Safe_safe+safe_205896.5847+210540.3741	1273
0Safe+0Safe_safe+safe_205896.5847+210725.6176	988
0Safe+0Safe_safe+safe_205896.5847+210743.6194	829
0Safe+0Safe_safe+safe_205896.5847+210809.6260	834
0Safe+0Safe_safe+safe_205896.5847+210925.6376	700
0Safe+0Safe_safe+safe_205896.5847+210935.6386	1056
0Safe+0Safe_safe+safe_205896.5847+210946.6397	1241
0Safe+0Safe_safe+safe_205896.5847+211135.6586	911
0Safe+0Safe_safe+safe_205926.5877+205926.5877	495
0Safe+0Safe_safe+safe_205926.5877+206014.5965	1227
0Safe+0Safe_safe+safe_205926.5877+206141.1592	1497
0Safe+0Safe_safe+safe_205926.5877+206175.1626	1183
0Safe+0Safe_safe+safe_205926.5877+206180.1631	1191
0Safe+0Safe_safe+safe_205926.5877+206276.1727	980
0Safe+0Safe_safe+safe_205926.5877+207086.1286	1289
0Safe+0Safe_safe+safe_205926.5877+207133.1333	1453
0Safe+0Safe_safe+safe_205926.5877+207268.1468	946
0Safe+0Safe_safe+safe_205926.5877+207272.1472	1435
0Safe+0Safe_safe+safe_205926.5877+207295.1495	1247
0Safe+0Safe_safe+safe_205926.5877+207412.862	1482
0Safe+0Safe_safe+safe_205926.5877+207644.2345	1705
0Safe+0Safe_safe+safe_205926.5877+207736.2437	1456
0Safe+0Safe_safe+safe_205926.5877+207762.2463	1460
0Safe+0Safe_safe+safe_205926.5877+207933.2634	1103
0Safe+0Safe_safe+safe_205926.5877+208027.2728	1007
0Safe+0Safe_safe+safe_205926.5877+208233.2934	1082
0Safe+0Safe_safe+safe_205926.5877+208249.2950	1403
0Safe+0Safe_safe+safe_205926.5877+208251.2952	1252
0Safe+0Safe_safe+safe_205926.5877+208266.2967	1192
0Safe+0Safe_safe+safe_205926.5877+208280.2981	1285
0Safe+0Safe_safe+safe_205926.5877+208288.2989	1556
0Safe+0Safe_safe+safe_205926.5877+208334.13	1171
0Safe+0Safe_safe+safe_205926.5877+208691.451	1298
0Safe+0Safe_safe+safe_205926.5877+208974.706	1292
0Safe+0Safe_safe+safe_205926.5877+209014.742	1224
0Safe+0Safe_safe+safe_205926.5877+209157.3858	1499
0Safe+0Safe_safe+safe_205926.5877+209400.4101	1414
0Safe+0Safe_safe+safe_205926.5877+209597.4298	1550
0Safe+0Safe_safe+safe_205926.5877+209963.3164	1135
0Safe+0Safe_safe+safe_205926.5877+209973.3174	1400
0Safe+0Safe_safe+safe_205926.5877+209990.3191	1155
0Safe+0Safe_safe+safe_205926.5877+210140.3341	1544
0Safe+0Safe_safe+safe_205926.5877+210313.3514	1484
0Safe+0Safe_safe+safe_205926.5877+210540.3741	1466
0Safe+0Safe_safe+safe_205926.5877+210725.6176	1205
0Safe+0Safe_safe+safe_205926.5877+210743.6194	1114
0Safe+0Safe_safe+safe_205926.5877+210809.6260	1244
0Safe+0Safe_safe+safe_205926.5877+210925.6376	830
0Safe+0Safe_safe+safe_205926.5877+210935.6386	1358
0Safe+0Safe_safe+safe_205926.5877+210946.6397	1531
0Safe+0Safe_safe+safe_205926.5877+211135.6586	1238
0Safe+0Safe_safe+safe_206014.5965+206014.5965	555
0Safe+0Safe_safe+safe_206014.5965+206141.1592	1207
0Safe+0Safe_safe+safe_206014.5965+206175.1626	1565
0Safe+0Safe_safe+safe_206014.5965+206180.1631	1065
0Safe+0Safe_safe+safe_206014.5965+206276.1727	884
0Safe+0Safe_safe+safe_206014.5965+207086.1286	1131
0Safe+0Safe_safe+safe_206014.5965+207133.1333	1220
0Safe+0Safe_safe+safe_206014.5965+207268.1468	809
0Safe+0Safe_safe+safe_206014.5965+207272.1472	1070
0Safe+0Safe_safe+safe_206014.5965+207295.1495	1470
0Safe+0Safe_safe+safe_206014.5965+207412.862	1161
0Safe+0Safe_safe+safe_206014.5965+207644.2345	1285
0Safe+0Safe_safe+safe_206014.5965+207736.2437	1002
0Safe+0Safe_safe+safe_206014.5965+207762.2463	985
0Safe+0Safe_safe+safe_206014.5965+207933.2634	1208
0Safe+0Safe_safe+safe_206014.5965+208027.2728	1278
0Safe+0Safe_safe+safe_206014.5965+208233.2934	1060
0Safe+0Safe_safe+safe_206014.5965+208249.2950	1202
0Safe+0Safe_safe+safe_206014.5965+208251.2952	1106
0Safe+0Safe_safe+safe_206014.5965+208266.2967	1073
0Safe+0Safe_safe+safe_206014.5965+208280.2981	1516
0Safe+0Safe_safe+safe_206014.5965+208288.2989	1270
0Safe+0Safe_safe+safe_206014.5965+208334.13	1337
0Safe+0Safe_safe+safe_206014.5965+208691.451	1371
0Safe+0Safe_safe+safe_206014.5965+208974.706	1448
0Safe+0Safe_safe+safe_206014.5965+209014.742	1131
0Safe+0Safe_safe+safe_206014.5965+209157.3858	1406
0Safe+0Safe_safe+safe_206014.5965+209400.4101	1467
0Safe+0Safe_safe+safe_206014.5965+209597.4298	1136
0Safe+0Safe_safe+safe_206014.5965+209963.3164	1215
0Safe+0Safe_safe+safe_206014.5965+209973.3174	1550
0Safe+0Safe_safe+safe_206014.5965+209990.3191	1289
0Safe+0Safe_safe+safe_206014.5965+210140.3341	1720
0Safe+0Safe_safe+safe_206014.5965+210313.3514	859
0Safe+0Safe_safe+safe_206014.5965+210540.3741	1445
0Safe+0Safe_safe+safe_206014.5965+210725.6176	1099
0Safe+0Safe_safe+safe_206014.5965+210743.6194	1143
0Safe+0Safe_safe+safe_206014.5965+210809.6260	767
0Safe+0Safe_safe+safe_206014.5965+210925.6376	977
0Safe+0Safe_safe+safe_206014.5965+210935.6386	1086
0Safe+0Safe_safe+safe_206014.5965+210946.6397	1137
0Safe+0Safe_safe+safe_206014.5965+211135.6586	945
0Safe+0Safe_safe+safe_206141.1592+206141.1592	562
0Safe+0Safe_safe+safe_206141.1592+206175.1626	1425
0Safe+0Safe_safe+safe_206141.1592+206180.1631	1064
0Safe+0Safe_safe+safe_206141.1592+206276.1727	1102
0Safe+0Safe_safe+safe_206141.1592+207086.1286	1575
0Safe+0Safe_safe+safe_206141.1592+207133.1333	1621
0Safe+0Safe_safe+safe_206141.1592+207268.1468	882
0Safe+0Safe_safe+safe_206141.1592+207272.1472	1214
0Safe+0Safe_safe+safe_206141.1592+207295.1495	1485
0Safe+0Safe_safe+safe_206141.1592+207412.862	1268
0Safe+0Safe_safe+safe_206141.1592+207644.2345	2145
0Safe+0Safe_safe+safe_206141.1592+207736.2437	1615
0Safe+0Safe_safe+safe_206141.1592+207762.2463	1350
0Safe+0Safe_safe+safe_206141.1592+207933.2634	1415
0Safe+0Safe_safe+safe_206141.1592+208027.2728	1360
0Safe+0Safe_safe+safe_206141.1592+208233.2934	1197
0Safe+0Safe_safe+safe_206141.1592+208249.2950	1774
0Safe+0Safe_safe+safe_206141.1592+208251.2952	1579
0Safe+0Safe_safe+safe_206141.1592+208266.2967	1658
0Safe+0Safe_safe+safe_206141.1592+208280.2981	2146
0Safe+0Safe_safe+safe_206141.1592+208288.2989	1632
0Safe+0Safe_safe+safe_206141.1592+208334.13	1486
0Safe+0Safe_safe+safe_206141.1592+208691.451	1147
0Safe+0Safe_safe+safe_206141.1592+208974.706	1263
0Safe+0Safe_safe+safe_206141.1592+209014.742	1220
0Safe+0Safe_safe+safe_206141.1592+209157.3858	1640
0Safe+0Safe_safe+safe_206141.1592+209400.4101	1544
0Safe+0Safe_safe+safe_206141.1592+209597.4298	1390
0Safe+0Safe_safe+safe_206141.1592+209963.3164	1192
0Safe+0Safe_safe+safe_206141.1592+209973.3174	1752
0Safe+0Safe_safe+safe_206141.1592+209990.3191	1435
0Safe+0Safe_safe+safe_206141.1592+210140.3341	1451
0Safe+0Safe_safe+safe_206141.1592+210313.3514	1156
0Safe+0Safe_safe+safe_206141.1592+210540.3741	1542
0Safe+0Safe_safe+safe_206141.1592+210725.6176	1094
0Safe+0Safe_safe+safe_206141.1592+210743.6194	1220
0Safe+0Safe_safe+safe_206141.1592+210809.6260	1336
0Safe+0Safe_safe+safe_206141.1592+210925.6376	1090
0Safe+0Safe_safe+safe_206141.1592+210935.6386	1297
0Safe+0Safe_safe+safe_206141.1592+210946.6397	1331
0Safe+0Safe_safe+safe_206141.1592+211135.6586	1430
0Safe+0Safe_safe+safe_206175.1626+206175.1626	538
0Safe+0Safe_safe+safe_206175.1626+206180.1631	1012
0Safe+0Safe_safe+safe_206175.1626+206276.1727	931
0Safe+0Safe_safe+safe_206175.1626+207086.1286	1285
0Safe+0Safe_safe+safe_206175.1626+207133.1333	1256
0Safe+0Safe_safe+safe_206175.1626+207268.1468	784
0Safe+0Safe_safe+safe_206175.1626+207272.1472	1133
0Safe+0Safe_safe+safe_206175.1626+207295.1495	1073
0Safe+0Safe_safe+safe_206175.1626+207412.862	1254
0Safe+0Safe_safe+safe_206175.1626+207644.2345	1415
0Safe+0Safe_safe+safe_206175.1626+207736.2437	1320
0Safe+0Safe_safe+safe_206175.1626+207762.2463	1203
0Safe+0Safe_safe+safe_206175.1626+207933.2634	1012
0Safe+0Safe_safe+safe_206175.1626+208027.2728	829
0Safe+0Safe_safe+safe_206175.1626+208233.2934	1362
0Safe+0Safe_safe+safe_206175.1626+208249.2950	1374
0Safe+0Safe_safe+safe_206175.1626+208251.2952	1501
0Safe+0Safe_safe+safe_206175.1626+208266.2967	1029
0Safe+0Safe_safe+safe_206175.1626+208280.2981	1540
0Safe+0Safe_safe+safe_206175.1626+208288.2989	998
0Safe+0Safe_safe+safe_206175.1626+208334.13	969
0Safe+0Safe_safe+safe_206175.1626+208691.451	1295
0Safe+0Safe_safe+safe_206175.1626+208974.706	1384
0Safe+0Safe_safe+safe_206175.1626+209014.742	1188
0Safe+0Safe_safe+safe_206175.1626+209157.3858	1324
0Safe+0Safe_safe+safe_206175.1626+209400.4101	1432
0Safe+0Safe_safe+safe_206175.1626+209597.4298	1155
0Safe+0Safe_safe+safe_206175.1626+209963.3164	1017
0Safe+0Safe_safe+safe_206175.1626+209973.3174	1738
0Safe+0Safe_safe+safe_206175.1626+209990.3191	1404
0Safe+0Safe_safe+safe_206175.1626+210140.3341	1837
0Safe+0Safe_safe+safe_206175.1626+210313.3514	1241
0Safe+0Safe_safe+safe_206175.1626+210540.3741	1652
0Safe+0Safe_safe+safe_206175.1626+210725.6176	1276
0Safe+0Safe_safe+safe_206175.1626+210743.6194	957
0Safe+0Safe_safe+safe_206175.1626+210809.6260	1043
0Safe+0Safe_safe+safe_206175.1626+210925.6376	923
0Safe+0Safe_safe+safe_206175.1626+210935.6386	996
0Safe+0Safe_safe+safe_206175.1626+210946.6397	1087
0Safe+0Safe_safe+safe_206175.1626+211135.6586	1344
0Safe+0Safe_safe+safe_206180.1631+206180.1631	505
0Safe+0Safe_safe+safe_206180.1631+206276.1727	1023
0Safe+0Safe_safe+safe_206180.1631+207086.1286	1437
0Safe+0Safe_safe+safe_206180.1631+207133.1333	1604
0Safe+0Safe_safe+safe_206180.1631+207268.1468	1031
0Safe+0Safe_safe+safe_206180.1631+207272.1472	1249
0Safe+0Safe_safe+safe_206180.1631+207295.1495	1114
0Safe+0Safe_safe+safe_206180.1631+207412.862	1176
0Safe+0Safe_safe+safe_206180.1631+207644.2345	1181
0Safe+0Safe_safe+safe_206180.1631+207736.2437	1164
0Safe+0Safe_safe+safe_206180.1631+207762.2463	1136
0Safe+0Safe_safe+safe_206180.1631+207933.2634	1399
0Safe+0Safe_safe+safe_206180.1631+208027.2728	1158
0Safe+0Safe_safe+safe_206180.1631+208233.2934	1081
0Safe+0Safe_safe+safe_206180.1631+208249.2950	1161
0Safe+0Safe_safe+safe_206180.1631+208251.2952	1278
0Safe+0Safe_safe+safe_206180.1631+208266.2967	1314
0Safe+0Safe_safe+safe_206180.1631+208280.2981	1543
0Safe+0Safe_safe+safe_206180.1631+208288.2989	1003
0Safe+0Safe_safe+safe_206180.1631+208334.13	990
0Safe+0Safe_safe+safe_206180.1631+208691.451	1073
0Safe+0Safe_safe+safe_206180.1631+208974.706	1414
0Safe+0Safe_safe+safe_206180.1631+209014.742	1109
0Safe+0Safe_safe+safe_206180.1631+209157.3858	1456
0Safe+0Safe_safe+safe_206180.1631+209400.4101	1542
0Safe+0Safe_safe+safe_206180.1631+209597.4298	1337
0Safe+0Safe_safe+safe_206180.1631+209963.3164	1300
0Safe+0Safe_safe+safe_206180.1631+209973.3174	1806
0Safe+0Safe_safe+safe_206180.1631+209990.3191	1142
0Safe+0Safe_safe+safe_206180.1631+210140.3341	1397
0Safe+0Safe_safe+safe_206180.1631+210313.3514	864
0Safe+0Safe_safe+safe_206180.1631+210540.3741	1341
0Safe+0Safe_safe+safe_206180.1631+210725.6176	1132
0Safe+0Safe_safe+safe_206180.1631+210743.6194	1318
0Safe+0Safe_safe+safe_206180.1631+210809.6260	1340
0Safe+0Safe_safe+safe_206180.1631+210925.6376	846
0Safe+0Safe_safe+safe_206180.1631+210935.6386	704
0Safe+0Safe_safe+safe_206180.1631+210946.6397	1445
0Safe+0Safe_safe+safe_206180.1631+211135.6586	911
0Safe+0Safe_safe+safe_206276.1727+206276.1727	282
0Safe+0Safe_safe+safe_206276.1727+207086.1286	1010
0Safe+0Safe_safe+safe_206276.1727+207133.1333	967
0Safe+0Safe_safe+safe_206276.1727+207268.1468	743
0Safe+0Safe_safe+safe_206276.1727+207272.1472	1315
0Safe+0Safe_safe+safe_206276.1727+207295.1495	1117
0Safe+0Safe_safe+safe_206276.1727+207412.862	743
0Safe+0Safe_safe+safe_206276.1727+207644.2345	1165
0Safe+0Safe_safe+safe_206276.1727+207736.2437	1259
0Safe+0Safe_safe+safe_206276.1727+207762.2463	983
0Safe+0Safe_safe+safe_206276.1727+207933.2634	994
0Safe+0Safe_safe+safe_206276.1727+208027.2728	836
0Safe+0Safe_safe+safe_206276.1727+208233.2934	1044
0Safe+0Safe_safe+safe_206276.1727+208249.2950	1357
0Safe+0Safe_safe+safe_206276.1727+208251.2952	1067
0Safe+0Safe_safe+safe_206276.1727+208266.2967	1190
0Safe+0Safe_safe+safe_206276.1727+208280.2981	1441
0Safe+0Safe_safe+safe_206276.1727+208288.2989	1289
0Safe+0Safe_safe+safe_206276.1727+208334.13	1060
0Safe+0Safe_safe+safe_206276.1727+208691.451	998
0Safe+0Safe_safe+safe_206276.1727+208974.706	1237
0Safe+0Safe_safe+safe_206276.1727+209014.742	824
0Safe+0Safe_safe+safe_206276.1727+209157.3858	1367
0Safe+0Safe_safe+safe_206276.1727+209400.4101	974
0Safe+0Safe_safe+safe_206276.1727+209597.4298	1222
0Safe+0Safe_safe+safe_206276.1727+209963.3164	816
0Safe+0Safe_safe+safe_206276.1727+209973.3174	1437
0Safe+0Safe_safe+safe_206276.1727+209990.3191	884
0Safe+0Safe_safe+safe_206276.1727+210140.3341	988
0Safe+0Safe_safe+safe_206276.1727+210313.3514	956
0Safe+0Safe_safe+safe_206276.1727+210540.3741	1376
0Safe+0Safe_safe+safe_206276.1727+210725.6176	702
0Safe+0Safe_safe+safe_206276.1727+210743.6194	779
0Safe+0Safe_safe+safe_206276.1727+210809.6260	1053
0Safe+0Safe_safe+safe_206276.1727+210925.6376	627
0Safe+0Safe_safe+safe_206276.1727+210935.6386	797
0Safe+0Safe_safe+safe_206276.1727+210946.6397	927
0Safe+0Safe_safe+safe_206276.1727+211135.6586	1206
0Safe+0Safe_safe+safe_207086.1286+207086.1286	468
0Safe+0Safe_safe+safe_207086.1286+207133.1333	1452
0Safe+0Safe_safe+safe_207086.1286+207268.1468	922
0Safe+0Safe_safe+safe_207086.1286+207272.1472	1249
0Safe+0Safe_safe+safe_207086.1286+207295.1495	1625
0Safe+0Safe_safe+safe_207086.1286+207412.862	1294
0Safe+0Safe_safe+safe_207086.1286+207644.2345	1818
0Safe+0Safe_safe+safe_207086.1286+207736.2437	1373
0Safe+0Safe_safe+safe_207086.1286+207762.2463	1028
0Safe+0Safe_safe+safe_207086.1286+207933.2634	1066
0Safe+0Safe_safe+safe_207086.1286+208027.2728	1484
0Safe+0Safe_safe+safe_207086.1286+208233.2934	978
0Safe+0Safe_safe+safe_207086.1286+208249.2950	1222
0Safe+0Safe_safe+safe_207086.1286+208251.2952	1381
0Safe+0Safe_safe+safe_207086.1286+208266.2967	1250
0Safe+0Safe_safe+safe_207086.1286+208280.2981	1724
0Safe+0Safe_safe+safe_207086.1286+208288.2989	1374
0Safe+0Safe_safe+safe_207086.1286+208334.13	979
0Safe+0Safe_safe+safe_207086.1286+208691.451	1258
0Safe+0Safe_safe+safe_207086.1286+208974.706	1518
0Safe+0Safe_safe+safe_207086.1286+209014.742	1048
0Safe+0Safe_safe+safe_207086.1286+209157.3858	1331
0Safe+0Safe_safe+safe_207086.1286+209400.4101	1566
0Safe+0Safe_safe+safe_207086.1286+209597.4298	1149
0Safe+0Safe_safe+safe_207086.1286+209963.3164	1139
0Safe+0Safe_safe+safe_207086.1286+209973.3174	1716
0Safe+0Safe_safe+safe_207086.1286+209990.3191	1422
0Safe+0Safe_safe+safe_207086.1286+210140.3341	1882
0Safe+0Safe_safe+safe_207086.1286+210313.3514	1203
0Safe+0Safe_safe+safe_207086.1286+210540.3741	1319
0Safe+0Safe_safe+safe_207086.1286+210725.6176	1524
0Safe+0Safe_safe+safe_207086.1286+210743.6194	1172
0Safe+0Safe_safe+safe_207086.1286+210809.6260	1367
0Safe+0Safe_safe+safe_207086.1286+210925.6376	1203
0Safe+0Safe_safe+safe_207086.1286+210935.6386	1254
0Safe+0Safe_safe+safe_207086.1286+210946.6397	969
0Safe+0Safe_safe+safe_207086.1286+211135.6586	1131
0Safe+0Safe_safe+safe_207133.1333+207133.1333	627
0Safe+0Safe_safe+safe_207133.1333+207268.1468	1008
0Safe+0Safe_safe+safe_207133.1333+207272.1472	1182
0Safe+0Safe_safe+safe_207133.1333+207295.1495	1480
0Safe+0Safe_safe+safe_207133.1333+207412.862	1376
0Safe+0Safe_safe+safe_207133.1333+207644.2345	1484
0Safe+0Safe_safe+safe_207133.1333+207736.2437	1548
0Safe+0Safe_safe+safe_207133.1333+207762.2463	1196
0Safe+0Safe_safe+safe_207133.1333+207933.2634	1299
0Safe+0Safe_safe+safe_207133.1333+208027.2728	1117
0Safe+0Safe_safe+safe_207133.1333+208233.2934	1668
0Safe+0Safe_safe+safe_207133.1333+208249.2950	1399
0Safe+0Safe_safe+safe_207133.1333+208251.2952	1602
0Safe+0Safe_safe+safe_207133.1333+208266.2967	1503
0Safe+0Safe_safe+safe_207133.1333+208280.2981	2022
0Safe+0Safe_safe+safe_207133.1333+208288.2989	1551
0Safe+0Safe_safe+safe_207133.1333+208334.13	1253
0Safe+0Safe_safe+safe_207133.1333+208691.451	1523
0Safe+0Safe_safe+safe_207133.1333+208974.706	1590
0Safe+0Safe_safe+safe_207133.1333+209014.742	1032
0Safe+0Safe_safe+safe_207133.1333+209157.3858	2185
0Safe+0Safe_safe+safe_207133.1333+209400.4101	1567
0Safe+0Safe_safe+safe_207133.1333+209597.4298	1223
0Safe+0Safe_safe+safe_207133.1333+209963.3164	1302
0Safe+0Safe_safe+safe_207133.1333+209973.3174	1760
0Safe+0Safe_safe+safe_207133.1333+209990.3191	1099
0Safe+0Safe_safe+safe_207133.1333+210140.3341	1975
0Safe+0Safe_safe+safe_207133.1333+210313.3514	1411
0Safe+0Safe_safe+safe_207133.1333+210540.3741	1632
0Safe+0Safe_safe+safe_207133.1333+210725.6176	1410
0Safe+0Safe_safe+safe_207133.1333+210743.6194	1259
0Safe+0Safe_safe+safe_207133.1333+210809.6260	1140
0Safe+0Safe_safe+safe_207133.1333+210925.6376	1012
0Safe+0Safe_safe+safe_207133.1333+210935.6386	1361
0Safe+0Safe_safe+safe_207133.1333+210946.6397	1473
0Safe+0Safe_safe+safe_207133.1333+211135.6586	1421
0Safe+0Safe_safe+safe_207268.1468+207268.1468	182
0Safe+0Safe_safe+safe_207268.1468+207272.1472	883
0Safe+0Safe_safe+safe_207268.1468+207295.1495	967
0Safe+0Safe_safe+safe_207268.1468+207412.862	660
0Safe+0Safe_safe+safe_207268.1468+207644.2345	1050
0Safe+0Safe_safe+safe_207268.1468+207736.2437	909
0Safe+0Safe_safe+safe_207268.1468+207762.2463	669
0Safe+0Safe_safe+safe_207268.1468+207933.2634	859
0Safe+0Safe_safe+safe_207268.1468+208027.2728	608
0Safe+0Safe_safe+safe_207268.1468+208233.2934	650
0Safe+0Safe_safe+safe_207268.1468+208249.2950	753
0Safe+0Safe_safe+safe_207268.1468+208251.2952	980
0Safe+0Safe_safe+safe_207268.1468+208266.2967	1008
0Safe+0Safe_safe+safe_207268.1468+208280.2981	1168
0Safe+0Safe_safe+safe_207268.1468+208288.2989	866
0Safe+0Safe_safe+safe_207268.1468+208334.13	904
0Safe+0Safe_safe+safe_207268.1468+208691.451	953
0Safe+0Safe_safe+safe_207268.1468+208974.706	950
0Safe+0Safe_safe+safe_207268.1468+209014.742	750
0Safe+0Safe_safe+safe_207268.1468+209157.3858	889
0Safe+0Safe_safe+safe_207268.1468+209400.4101	871
0Safe+0Safe_safe+safe_207268.1468+209597.4298	758
0Safe+0Safe_safe+safe_207268.1468+209963.3164	949
0Safe+0Safe_safe+safe_207268.1468+209973.3174	1377
0Safe+0Safe_safe+safe_207268.1468+209990.3191	825
0Safe+0Safe_safe+safe_207268.1468+210140.3341	1427
0Safe+0Safe_safe+safe_207268.1468+210313.3514	923
0Safe+0Safe_safe+safe_207268.1468+210540.3741	958
0Safe+0Safe_safe+safe_207268.1468+210725.6176	817
0Safe+0Safe_safe+safe_207268.1468+210743.6194	890
0Safe+0Safe_safe+safe_207268.1468+210809.6260	864
0Safe+0Safe_safe+safe_207268.1468+210925.6376	867
0Safe+0Safe_safe+safe_207268.1468+210935.6386	719
0Safe+0Safe_safe+safe_207268.1468+210946.6397	865
0Safe+0Safe_safe+safe_207268.1468+211135.6586	967
0Safe+0Safe_safe+safe_207272.1472+207272.1472	423
0Safe+0Safe_safe+safe_207272.1472+207295.1495	1302
0Safe+0Safe_safe+safe_207272.1472+207412.862	812
0Safe+0Safe_safe+safe_207272.1472+207644.2345	1337
0Safe+0Safe_safe+safe_207272.1472+207736.2437	1090
0Safe+0Safe_safe+safe_207272.1472+207762.2463	1042
0Safe+0Safe_safe+safe_207272.1472+207933.2634	1149
0Safe+0Safe_safe+safe_207272.1472+208027.2728	969
0Safe+0Safe_safe+safe_207272.1472+208233.2934	1159
0Safe+0Safe_safe+safe_207272.1472+208249.2950	1039
0Safe+0Safe_safe+safe_207272.1472+208251.2952	1309
0Safe+0Safe_safe+safe_207272.1472+208266.2967	1418
0Safe+0Safe_safe+safe_207272.1472+208280.2981	1125
0Safe+0Safe_safe+safe_207272.1472+208288.2989	1133
0Safe+0Safe_safe+safe_207272.1472+208334.13	1381
0Safe+0Safe_safe+safe_207272.1472+208691.451	916
0Safe+0Safe_safe+safe_207272.1472+208974.706	1280
0Safe+0Safe_safe+safe_207272.1472+209014.742	940
0Safe+0Safe_safe+safe_207272.1472+209157.3858	1286
0Safe+0Safe_safe+safe_207272.1472+209400.4101	1279
0Safe+0Safe_safe+safe_207272.1472+209597.4298	1081
0Safe+0Safe_safe+safe_207272.1472+209963.3164	1075
0Safe+0Safe_safe+safe_207272.1472+209973.3174	1459
0Safe+0Safe_safe+safe_207272.1472+209990.3191	932
0Safe+0Safe_safe+safe_207272.1472+210140.3341	1433
0Safe+0Safe_safe+safe_207272.1472+210313.3514	1079
0Safe+0Safe_safe+safe_207272.1472+210540.3741	1397
0Safe+0Safe_safe+safe_207272.1472+210725.6176	1404
0Safe+0Safe_safe+safe_207272.1472+210743.6194	1050
0Safe+0Safe_safe+safe_207272.1472+210809.6260	987
0Safe+0Safe_safe+safe_207272.1472+210925.6376	887
0Safe+0Safe_safe+safe_207272.1472+210935.6386	1085
0Safe+0Safe_safe+safe_207272.1472+210946.6397	1274
0Safe+0Safe_safe+safe_207272.1472+211135.6586	1144
0Safe+0Safe_safe+safe_207295.1495+207295.1495	406
0Safe+0Safe_safe+safe_207295.1495+207412.862	1331
0Safe+0Safe_safe+safe_207295.1495+207644.2345	1625
0Safe+0Safe_safe+safe_207295.1495+207736.2437	1668
0Safe+0Safe_safe+safe_207295.1495+207762.2463	1016
0Safe+0Safe_safe+safe_207295.1495+207933.2634	1202
0Safe+0Safe_safe+safe_207295.1495+208027.2728	1158
0Safe+0Safe_safe+safe_207295.1495+208233.2934	1243
0Safe+0Safe_safe+safe_207295.1495+208249.2950	1408
0Safe+0Safe_safe+safe_207295.1495+208251.2952	1390
0Safe+0Safe_safe+safe_207295.1495+208266.2967	1645
0Safe+0Safe_safe+safe_207295.1495+208280.2981	1553
0Safe+0Safe_safe+safe_207295.1495+208288.2989	1471
0Safe+0Safe_safe+safe_207295.1495+208334.13	1207
0Safe+0Safe_safe+safe_207295.1495+208691.451	1317
0Safe+0Safe_safe+safe_207295.1495+208974.706	1581
0Safe+0Safe_safe+safe_207295.1495+209014.742	1040
0Safe+0Safe_safe+safe_207295.1495+209157.3858	1673
0Safe+0Safe_safe+safe_207295.1495+209400.4101	1903
0Safe+0Safe_safe+safe_207295.1495+209597.4298	1247
0Safe+0Safe_safe+safe_207295.1495+209963.3164	1264
0Safe+0Safe_safe+safe_207295.1495+209973.3174	1903
0Safe+0Safe_safe+safe_207295.1495+209990.3191	1093
0Safe+0Safe_safe+safe_207295.1495+210140.3341	1465
0Safe+0Safe_safe+safe_207295.1495+210313.3514	1082
0Safe+0Safe_safe+safe_207295.1495+210540.3741	1191
0Safe+0Safe_safe+safe_207295.1495+210725.6176	1099
0Safe+0Safe_safe+safe_207295.1495+210743.6194	1167
0Safe+0Safe_safe+safe_207295.1495+210809.6260	762
0Safe+0Safe_safe+safe_207295.1495+210925.6376	1106
0Safe+0Safe_safe+safe_207295.1495+210935.6386	1211
0Safe+0Safe_safe+safe_207295.1495+210946.6397	1300
0Safe+0Safe_safe+safe_207295.1495+211135.6586	1163
0Safe+0Safe_safe+safe_207412.862+207412.862	169
0Safe+0Safe_safe+safe_207412.862+207644.2345	1579
0Safe+0Safe_safe+safe_207412.862+207736.2437	1021
0Safe+0Safe_safe+safe_207412.862+207762.2463	1238
0Safe+0Safe_safe+safe_207412.862+207933.2634	1606
0Safe+0Safe_safe+safe_207412.862+208027.2728	891
0Safe+0Safe_safe+safe_207412.862+208233.2934	768
0Safe+0Safe_safe+safe_207412.862+208249.2950	1246
0Safe+0Safe_safe+safe_207412.862+208251.2952	1390
0Safe+0Safe_safe+safe_207412.862+208266.2967	1393
0Safe+0Safe_safe+safe_207412.862+208280.2981	1543
0Safe+0Safe_safe+safe_207412.862+208288.2989	1111
0Safe+0Safe_safe+safe_207412.862+208334.13	1284
0Safe+0Safe_safe+safe_207412.862+208691.451	890
0Safe+0Safe_safe+safe_207412.862+208974.706	1753
0Safe+0Safe_safe+safe_207412.862+209014.742	1129
0Safe+0Safe_safe+safe_207412.862+209157.3858	1240
0Safe+0Safe_safe+safe_207412.862+209400.4101	1215
0Safe+0Safe_safe+safe_207412.862+209597.4298	903
0Safe+0Safe_safe+safe_207412.862+209963.3164	1276
0Safe+0Safe_safe+safe_207412.862+209973.3174	1781
0Safe+0Safe_safe+safe_207412.862+209990.3191	1347
0Safe+0Safe_safe+safe_207412.862+210140.3341	1348
0Safe+0Safe_safe+safe_207412.862+210313.3514	1214
0Safe+0Safe_safe+safe_207412.862+210540.3741	1367
0Safe+0Safe_safe+safe_207412.862+210725.6176	1184
0Safe+0Safe_safe+safe_207412.862+210743.6194	805
0Safe+0Safe_safe+safe_207412.862+210809.6260	1171
0Safe+0Safe_safe+safe_207412.862+210925.6376	824
0Safe+0Safe_safe+safe_207412.862+210935.6386	1167
0Safe+0Safe_safe+safe_207412.862+210946.6397	1145
0Safe+0Safe_safe+safe_207412.862+211135.6586	1054
0Safe+0Safe_safe+safe_207644.2345+207644.2345	661
0Safe+0Safe_safe+safe_207644.2345+207736.2437	1429
0Safe+0Safe_safe+safe_207644.2345+207762.2463	1231
0Safe+0Safe_safe+safe_207644.2345+207933.2634	1494
0Safe+0Safe_safe+safe_207644.2345+208027.2728	1140
0Safe+0Safe_safe+safe_207644.2345+208233.2934	1417
0Safe+0Safe_safe+safe_207644.2345+208249.2950	1219
0Safe+0Safe_safe+safe_207644.2345+208251.2952	1768
0Safe+0Safe_safe+safe_207644.2345+208266.2967	1483
0Safe+0Safe_safe+safe_207644.2345+208280.2981	1836
0Safe+0Safe_safe+safe_207644.2345+208288.2989	1605
0Safe+0Safe_safe+safe_207644.2345+208334.13	1395
0Safe+0Safe_safe+safe_207644.2345+208691.451	1479
0Safe+0Safe_safe+safe_207644.2345+208974.706	1344
0Safe+0Safe_safe+safe_207644.2345+209014.742	1279
0Safe+0Safe_safe+safe_207644.2345+209157.3858	1543
0Safe+0Safe_safe+safe_207644.2345+209400.4101	1321
0Safe+0Safe_safe+safe_207644.2345+209597.4298	1443
0Safe+0Safe_safe+safe_207644.2345+209963.3164	1239
0Safe+0Safe_safe+safe_207644.2345+209973.3174	1754
0Safe+0Safe_safe+safe_207644.2345+209990.3191	1517
0Safe+0Safe_safe+safe_207644.2345+210140.3341	1885
0Safe+0Safe_safe+safe_207644.2345+210313.3514	1538
0Safe+0Safe_safe+safe_207644.2345+210540.3741	1508
0Safe+0Safe_safe+safe_207644.2345+210725.6176	1302
0Safe+0Safe_safe+safe_207644.2345+210743.6194	1282
0Safe+0Safe_safe+safe_207644.2345+210809.6260	1240
0Safe+0Safe_safe+safe_207644.2345+210925.6376	1172
0Safe+0Safe_safe+safe_207644.2345+210935.6386	1165
0Safe+0Safe_safe+safe_207644.2345+210946.6397	1405
0Safe+0Safe_safe+safe_207644.2345+211135.6586	1592
0Safe+0Safe_safe+safe_207736.2437+207736.2437	375
0Safe+0Safe_safe+safe_207736.2437+207762.2463	1035
0Safe+0Safe_safe+safe_207736.2437+207933.2634	1456
0Safe+0Safe_safe+safe_207736.2437+208027.2728	768
0Safe+0Safe_safe+safe_207736.2437+208233.2934	1280
0Safe+0Safe_safe+safe_207736.2437+208249.2950	1162
0Safe+0Safe_safe+safe_207736.2437+208251.2952	1138
0Safe+0Safe_safe+safe_207736.2437+208266.2967	1494
0Safe+0Safe_safe+safe_207736.2437+208280.2981	1659
0Safe+0Safe_safe+safe_207736.2437+208288.2989	1262
0Safe+0Safe_safe+safe_207736.2437+208334.13	1031
0Safe+0Safe_safe+safe_207736.2437+208691.451	1279
0Safe+0Safe_safe+safe_207736.2437+208974.706	1431
0Safe+0Safe_safe+safe_207736.2437+209014.742	881
0Safe+0Safe_safe+safe_207736.2437+209157.3858	1288
0Safe+0Safe_safe+safe_207736.2437+209400.4101	1641
0Safe+0Safe_safe+safe_207736.2437+209597.4298	1094
0Safe+0Safe_safe+safe_207736.2437+209963.3164	1173
0Safe+0Safe_safe+safe_207736.2437+209973.3174	1718
0Safe+0Safe_safe+safe_207736.2437+209990.3191	1069
0Safe+0Safe_safe+safe_207736.2437+210140.3341	1438
0Safe+0Safe_safe+safe_207736.2437+210313.3514	757
0Safe+0Safe_safe+safe_207736.2437+210540.3741	1484
0Safe+0Safe_safe+safe_207736.2437+210725.6176	1042
0Safe+0Safe_safe+safe_207736.2437+210743.6194	1058
0Safe+0Safe_safe+safe_207736.2437+210809.6260	1016
0Safe+0Safe_safe+safe_207736.2437+210925.6376	801
0Safe+0Safe_safe+safe_207736.2437+210935.6386	968
0Safe+0Safe_safe+safe_207736.2437+210946.6397	1583
0Safe+0Safe_safe+safe_207736.2437+211135.6586	952
0Safe+0Safe_safe+safe_207762.2463+207762.2463	312
0Safe+0Safe_safe+safe_207762.2463+207933.2634	978
0Safe+0Safe_safe+safe_207762.2463+208027.2728	972
0Safe+0Safe_safe+safe_207762.2463+208233.2934	876
0Safe+0Safe_safe+safe_207762.2463+208249.2950	1252
0Safe+0Safe_safe+safe_207762.2463+208251.2952	1083
0Safe+0Safe_safe+safe_207762.2463+208266.2967	1094
0Safe+0Safe_safe+safe_207762.2463+208280.2981	1353
0Safe+0Safe_safe+safe_207762.2463+208288.2989	1260
0Safe+0Safe_safe+safe_207762.2463+208334.13	838
0Safe+0Safe_safe+safe_207762.2463+208691.451	1238
0Safe+0Safe_safe+safe_207762.2463+208974.706	1403
0Safe+0Safe_safe+safe_207762.2463+209014.742	896
0Safe+0Safe_safe+safe_207762.2463+209157.3858	1255
0Safe+0Safe_safe+safe_207762.2463+209400.4101	1224
0Safe+0Safe_safe+safe_207762.2463+209597.4298	928
0Safe+0Safe_safe+safe_207762.2463+209963.3164	1158
0Safe+0Safe_safe+safe_207762.2463+209973.3174	1376
0Safe+0Safe_safe+safe_207762.2463+209990.3191	1084
0Safe+0Safe_safe+safe_207762.2463+210140.3341	1237
0Safe+0Safe_safe+safe_207762.2463+210313.3514	850
0Safe+0Safe_safe+safe_207762.2463+210540.3741	1350
0Safe+0Safe_safe+safe_207762.2463+210725.6176	1070
0Safe+0Safe_safe+safe_207762.2463+210743.6194	1141
0Safe+0Safe_safe+safe_207762.2463+210809.6260	888
0Safe+0Safe_safe+safe_207762.2463+210925.6376	703
0Safe+0Safe_safe+safe_207762.2463+210935.6386	828
0Safe+0Safe_safe+safe_207762.2463+210946.6397	916
0Safe+0Safe_safe+safe_207762.2463+211135.6586	1101
0Safe+0Safe_safe+safe_207933.2634+207933.2634	428
0Safe+0Safe_safe+safe_207933.2634+208027.2728	1012
0Safe+0Safe_safe+safe_207933.2634+208233.2934	1101
0Safe+0Safe_safe+safe_207933.2634+208249.2950	1102
0Safe+0Safe_safe+safe_207933.2634+208251.2952	1443
0Safe+0Safe_safe+safe_207933.2634+208266.2967	1234
0Safe+0Safe_safe+safe_207933.2634+208280.2981	1491
0Safe+0Safe_safe+safe_207933.2634+208288.2989	1457
0Safe+0Safe_safe+safe_207933.2634+208334.13	1159
0Safe+0Safe_safe+safe_207933.2634+208691.451	1148
0Safe+0Safe_safe+safe_207933.2634+208974.706	1218
0Safe+0Safe_safe+safe_207933.2634+209014.742	550
0Safe+0Safe_safe+safe_207933.2634+209157.3858	1250
0Safe+0Safe_safe+safe_207933.2634+209400.4101	1334
0Safe+0Safe_safe+safe_207933.2634+209597.4298	1374
0Safe+0Safe_safe+safe_207933.2634+209963.3164	1300
0Safe+0Safe_safe+safe_207933.2634+209973.3174	1759
0Safe+0Safe_safe+safe_207933.2634+209990.3191	1246
0Safe+0Safe_safe+safe_207933.2634+210140.3341	1199
0Safe+0Safe_safe+safe_207933.2634+210313.3514	1209
0Safe+0Safe_safe+safe_207933.2634+210540.3741	1449
0Safe+0Safe_safe+safe_207933.2634+210725.6176	1295
0Safe+0Safe_safe+safe_207933.2634+210743.6194	1076
0Safe+0Safe_safe+safe_207933.2634+210809.6260	1162
0Safe+0Safe_safe+safe_207933.2634+210925.6376	912
0Safe+0Safe_safe+safe_207933.2634+210935.6386	975
0Safe+0Safe_safe+safe_207933.2634+210946.6397	812
0Safe+0Safe_safe+safe_207933.2634+211135.6586	1166
0Safe+0Safe_safe+safe_208027.2728+208027.2728	249
0Safe+0Safe_safe+safe_208027.2728+208233.2934	1110
0Safe+0Safe_safe+safe_208027.2728+208249.2950	1528
0Safe+0Safe_safe+safe_208027.2728+208251.2952	1231
0Safe+0Safe_safe+safe_208027.2728+208266.2967	1128
0Safe+0Safe_safe+safe_208027.2728+208280.2981	1177
0Safe+0Safe_safe+safe_208027.2728+208288.2989	1345
0Safe+0Safe_safe+safe_208027.2728+208334.13	1045
0Safe+0Safe_safe+safe_208027.2728+208691.451	1082
0Safe+0Safe_safe+safe_208027.2728+208974.706	1169
0Safe+0Safe_safe+safe_208027.2728+209014.742	1222
0Safe+0Safe_safe+safe_208027.2728+209157.3858	1500
0Safe+0Safe_safe+safe_208027.2728+209400.4101	1223
0Safe+0Safe_safe+safe_208027.2728+209597.4298	1143
0Safe+0Safe_safe+safe_208027.2728+209963.3164	889
0Safe+0Safe_safe+safe_208027.2728+209973.3174	1625
0Safe+0Safe_safe+safe_208027.2728+209990.3191	995
0Safe+0Safe_safe+safe_208027.2728+210140.3341	1252
0Safe+0Safe_safe+safe_208027.2728+210313.3514	945
0Safe+0Safe_safe+safe_208027.2728+210540.3741	1391
0Safe+0Safe_safe+safe_208027.2728+210725.6176	964
0Safe+0Safe_safe+safe_208027.2728+210743.6194	897
0Safe+0Safe_safe+safe_208027.2728+210809.6260	1152
0Safe+0Safe_safe+safe_208027.2728+210925.6376	788
0Safe+0Safe_safe+safe_208027.2728+210935.6386	766
0Safe+0Safe_safe+safe_208027.2728+210946.6397	986
0Safe+0Safe_safe+safe_208027.2728+211135.6586	1168
0Safe+0Safe_safe+safe_208233.2934+208233.2934	292
0Safe+0Safe_safe+safe_208233.2934+208249.2950	1235
0Safe+0Safe_safe+safe_208233.2934+208251.2952	1058
0Safe+0Safe_safe+safe_208233.2934+208266.2967	1309
0Safe+0Safe_safe+safe_208233.2934+208280.2981	1557
0Safe+0Safe_safe+safe_208233.2934+208288.2989	1305
0Safe+0Safe_safe+safe_208233.2934+208334.13	1570
0Safe+0Safe_safe+safe_208233.2934+208691.451	1053
0Safe+0Safe_safe+safe_208233.2934+208974.706	1449
0Safe+0Safe_safe+safe_208233.2934+209014.742	967
0Safe+0Safe_safe+safe_208233.2934+209157.3858	1338
0Safe+0Safe_safe+safe_208233.2934+209400.4101	1110
0Safe+0Safe_safe+safe_208233.2934+209597.4298	1095
0Safe+0Safe_safe+safe_208233.2934+209963.3164	1233
0Safe+0Safe_safe+safe_208233.2934+209973.3174	1592
0Safe+0Safe_safe+safe_208233.2934+209990.3191	990
0Safe+0Safe_safe+safe_208233.2934+210140.3341	1203
0Safe+0Safe_safe+safe_208233.2934+210313.3514	1372
0Safe+0Safe_safe+safe_208233.2934+210540.3741	1792
0Safe+0Safe_safe+safe_208233.2934+210725.6176	1146
0Safe+0Safe_safe+safe_208233.2934+210743.6194	1204
0Safe+0Safe_safe+safe_208233.2934+210809.6260	945
0Safe+0Safe_safe+safe_208233.2934+210925.6376	828
0Safe+0Safe_safe+safe_208233.2934+210935.6386	1160
0Safe+0Safe_safe+safe_208233.2934+210946.6397	1247
0Safe+0Safe_safe+safe_208233.2934+211135.6586	906
0Safe+0Safe_safe+safe_208249.2950+208249.2950	477
0Safe+0Safe_safe+safe_208249.2950+208251.2952	1203
0Safe+0Safe_safe+safe_208249.2950+208266.2967	1273
0Safe+0Safe_safe+safe_208249.2950+208280.2981	1725
0Safe+0Safe_safe+safe_208249.2950+208288.2989	1429
0Safe+0Safe_safe+safe_208249.2950+208334.13	1123
0Safe+0Safe_safe+safe_208249.2950+208691.451	1075
0Safe+0Safe_safe+safe_208249.2950+208974.706	1315
0Safe+0Safe_safe+safe_208249.2950+209014.742	1167
0Safe+0Safe_safe+safe_208249.2950+209157.3858	1533
0Safe+0Safe_safe+safe_208249.2950+209400.4101	1753
0Safe+0Safe_safe+safe_208249.2950+209597.4298	1308
0Safe+0Safe_safe+safe_208249.2950+209963.3164	1449
0Safe+0Safe_safe+safe_208249.2950+209973.3174	1498
0Safe+0Safe_safe+safe_208249.2950+209990.3191	1134
0Safe+0Safe_safe+safe_208249.2950+210140.3341	1355
0Safe+0Safe_safe+safe_208249.2950+210313.3514	1073
0Safe+0Safe_safe+safe_208249.2950+210540.3741	1148
0Safe+0Safe_safe+safe_208249.2950+210725.6176	1497
0Safe+0Safe_safe+safe_208249.2950+210743.6194	971
0Safe+0Safe_safe+safe_208249.2950+210809.6260	873
0Safe+0Safe_safe+safe_208249.2950+210925.6376	985
0Safe+0Safe_safe+safe_208249.2950+210935.6386	992
0Safe+0Safe_safe+safe_208249.2950+210946.6397	1100
0Safe+0Safe_safe+safe_208249.2950+211135.6586	1027
0Safe+0Safe_safe+safe_208251.2952+208251.2952	438
0Safe+0Safe_safe+safe_208251.2952+208266.2967	1601
0Safe+0Safe_safe+safe_208251.2952+208280.2981	1988
0Safe+0Safe_safe+safe_208251.2952+208288.2989	1297
0Safe+0Safe_safe+safe_208251.2952+208334.13	1043
0Safe+0Safe_safe+safe_208251.2952+208691.451	1137
0Safe+0Safe_safe+safe_208251.2952+208974.706	1731
0Safe+0Safe_safe+safe_208251.2952+209014.742	1368
0Safe+0Safe_safe+safe_208251.2952+209157.3858	1694
0Safe+0Safe_safe+safe_208251.2952+209400.4101	1657
0Safe+0Safe_safe+safe_208251.2952+209597.4298	1444
0Safe+0Safe_safe+safe_208251.2952+209963.3164	1438
0Safe+0Safe_safe+safe_208251.2952+209973.3174	1793
0Safe+0Safe_safe+safe_208251.2952+209990.3191	1571
0Safe+0Safe_safe+safe_208251.2952+210140.3341	1435
0Safe+0Safe_safe+safe_208251.2952+210313.3514	1239
0Safe+0Safe_safe+safe_208251.2952+210540.3741	1726
0Safe+0Safe_safe+safe_208251.2952+210725.6176	996
0Safe+0Safe_safe+safe_208251.2952+210743.6194	1269
0Safe+0Safe_safe+safe_208251.2952+210809.6260	936
0Safe+0Safe_safe+safe_208251.2952+210925.6376	845
0Safe+0Safe_safe+safe_208251.2952+210935.6386	1325
0Safe+0Safe_safe+safe_208251.2952+210946.6397	1496
0Safe+0Safe_safe+safe_208251.2952+211135.6586	1444
0Safe+0Safe_safe+safe_208266.2967+208266.2967	643
0Safe+0Safe_safe+safe_208266.2967+208280.2981	2008
0Safe+0Safe_safe+safe_208266.2967+208288.2989	1508
0Safe+0Safe_safe+safe_208266.2967+208334.13	1153
0Safe+0Safe_safe+safe_208266.2967+208691.451	1319
0Safe+0Safe_safe+safe_208266.2967+208974.706	1358
0Safe+0Safe_safe+safe_208266.2967+209014.742	1082
0Safe+0Safe_safe+safe_208266.2967+209157.3858	1591
0Safe+0Safe_safe+safe_208266.2967+209400.4101	1399
0Safe+0Safe_safe+safe_208266.2967+209597.4298	1616
0Safe+0Safe_safe+safe_208266.2967+209963.3164	1275
0Safe+0Safe_safe+safe_208266.2967+209973.3174	1363
0Safe+0Safe_safe+safe_208266.2967+209990.3191	1441
0Safe+0Safe_safe+safe_208266.2967+210140.3341	1736
0Safe+0Safe_safe+safe_208266.2967+210313.3514	1153
0Safe+0Safe_safe+safe_208266.2967+210540.3741	1578
0Safe+0Safe_safe+safe_208266.2967+210725.6176	1395
0Safe+0Safe_safe+safe_208266.2967+210743.6194	1203
0Safe+0Safe_safe+safe_208266.2967+210809.6260	1423
0Safe+0Safe_safe+safe_208266.2967+210925.6376	684
0Safe+0Safe_safe+safe_208266.2967+210935.6386	1171
0Safe+0Safe_safe+safe_208266.2967+210946.6397	1285
0Safe+0Safe_safe+safe_208266.2967+211135.6586	1119
0Safe+0Safe_safe+safe_208280.2981+208280.2981	937
0Safe+0Safe_safe+safe_208280.2981+208288.2989	1785
0Safe+0Safe_safe+safe_208280.2981+208334.13	1686
0Safe+0Safe_safe+safe_208280.2981+208691.451	1609
0Safe+0Safe_safe+safe_208280.2981+208974.706	1662
0Safe+0Safe_safe+safe_208280.2981+209014.742	1460
0Safe+0Safe_safe+safe_208280.2981+209157.3858	1630
0Safe+0Safe_safe+safe_208280.2981+209400.4101	1878
0Safe+0Safe_safe+safe_208280.2981+209597.4298	1592
0Safe+0Safe_safe+safe_208280.2981+209963.3164	1479
0Safe+0Safe_safe+safe_208280.2981+209973.3174	2034
0Safe+0Safe_safe+safe_208280.2981+209990.3191	1243
0Safe+0Safe_safe+safe_208280.2981+210140.3341	1603
0Safe+0Safe_safe+safe_208280.2981+210313.3514	1420
0Safe+0Safe_safe+safe_208280.2981+210540.3741	1834
0Safe+0Safe_safe+safe_208280.2981+210725.6176	1451
0Safe+0Safe_safe+safe_208280.2981+210743.6194	1387
0Safe+0Safe_safe+safe_208280.2981+210809.6260	1317
0Safe+0Safe_safe+safe_208280.2981+210925.6376	1122
0Safe+0Safe_safe+safe_208280.2981+210935.6386	1818
0Safe+0Safe_safe+safe_208280.2981+210946.6397	1460
0Safe+0Safe_safe+safe_208280.2981+211135.6586	1059
0Safe+0Safe_safe+safe_208288.2989+208288.2989	460
0Safe+0Safe_safe+safe_208288.2989+208334.13	1180
0Safe+0Safe_safe+safe_208288.2989+208691.451	1060
0Safe+0Safe_safe+safe_208288.2989+208974.706	1724
0Safe+0Safe_safe+safe_208288.2989+209014.742	1033
0Safe+0Safe_safe+safe_208288.2989+209157.3858	1417
0Safe+0Safe_safe+safe_208288.2989+209400.4101	1213
0Safe+0Safe_safe+safe_208288.2989+209597.4298	1206
0Safe+0Safe_safe+safe_208288.2989+209963.3164	1639
0Safe+0Safe_safe+safe_208288.2989+209973.3174	1615
0Safe+0Safe_safe+safe_208288.2989+209990.3191	1058
0Safe+0Safe_safe+safe_208288.2989+210140.3341	1692
0Safe+0Safe_safe+safe_208288.2989+210313.3514	1317
0Safe+0Safe_safe+safe_208288.2989+210540.3741	1518
0Safe+0Safe_safe+safe_208288.2989+210725.6176	1238
0Safe+0Safe_safe+safe_208288.2989+210743.6194	1163
0Safe+0Safe_safe+safe_208288.2989+210809.6260	1145
0Safe+0Safe_safe+safe_208288.2989+210925.6376	1242
0Safe+0Safe_safe+safe_208288.2989+210935.6386	1033
0Safe+0Safe_safe+safe_208288.2989+210946.6397	1325
0Safe+0Safe_safe+safe_208288.2989+211135.6586	1025
0Safe+0Safe_safe+safe_208334.13+208334.13	452
0Safe+0Safe_safe+safe_208334.13+208691.451	1018
0Safe+0Safe_safe+safe_208334.13+208974.706	1444
0Safe+0Safe_safe+safe_208334.13+209014.742	1162
0Safe+0Safe_safe+safe_208334.13+209157.3858	1301
0Safe+0Safe_safe+safe_208334.13+209400.4101	1360
0Safe+0Safe_safe+safe_208334.13+209597.4298	1183
0Safe+0Safe_safe+safe_208334.13+209963.3164	737
0Safe+0Safe_safe+safe_208334.13+209973.3174	1633
0Safe+0Safe_safe+safe_208334.13+209990.3191	1205
0Safe+0Safe_safe+safe_208334.13+210140.3341	1444
0Safe+0Safe_safe+safe_208334.13+210313.3514	1268
0Safe+0Safe_safe+safe_208334.13+210540.3741	1190
0Safe+0Safe_safe+safe_208334.13+210725.6176	1204
0Safe+0Safe_safe+safe_208334.13+210743.6194	1129
0Safe+0Safe_safe+safe_208334.13+210809.6260	1004
0Safe+0Safe_safe+safe_208334.13+210925.6376	1109
0Safe+0Safe_safe+safe_208334.13+210935.6386	914
0Safe+0Safe_safe+safe_208334.13+210946.6397	1367
0Safe+0Safe_safe+safe_208334.13+211135.6586	836
0Safe+0Safe_safe+safe_208691.451+208691.451	530
0Safe+0Safe_safe+safe_208691.451+208974.706	1495
0Safe+0Safe_safe+safe_208691.451+209014.742	1050
0Safe+0Safe_safe+safe_208691.451+209157.3858	1238
0Safe+0Safe_safe+safe_208691.451+209400.4101	1530
0Safe+0Safe_safe+safe_208691.451+209597.4298	1219
0Safe+0Safe_safe+safe_208691.451+209963.3164	1148
0Safe+0Safe_safe+safe_208691.451+209973.3174	1644
0Safe+0Safe_safe+safe_208691.451+209990.3191	1131
0Safe+0Safe_safe+safe_208691.451+210140.3341	1571
0Safe+0Safe_safe+safe_208691.451+210313.3514	1319
0Safe+0Safe_safe+safe_208691.451+210540.3741	1371
0Safe+0Safe_safe+safe_208691.451+210725.6176	894
0Safe+0Safe_safe+safe_208691.451+210743.6194	1269
0Safe+0Safe_safe+safe_208691.451+210809.6260	1149
0Safe+0Safe_safe+safe_208691.451+210925.6376	1056
0Safe+0Safe_safe+safe_208691.451+210935.6386	1266
0Safe+0Safe_safe+safe_208691.451+210946.6397	899
0Safe+0Safe_safe+safe_208691.451+211135.6586	1091
0Safe+0Safe_safe+safe_208974.706+208974.706	515
0Safe+0Safe_safe+safe_208974.706+209014.742	1186
0Safe+0Safe_safe+safe_208974.706+209157.3858	1613
0Safe+0Safe_safe+safe_208974.706+209400.4101	1322
0Safe+0Safe_safe+safe_208974.706+209597.4298	1094
0Safe+0Safe_safe+safe_208974.706+209963.3164	1940
0Safe+0Safe_safe+safe_208974.706+209973.3174	1975
0Safe+0Safe_safe+safe_208974.706+209990.3191	1319
0Safe+0Safe_safe+safe_208974.706+210140.3341	1774
0Safe+0Safe_safe+safe_208974.706+210313.3514	1427
0Safe+0Safe_safe+safe_208974.706+210540.3741	1667
0Safe+0Safe_safe+safe_208974.706+210725.6176	1406
0Safe+0Safe_safe+safe_208974.706+210743.6194	1430
0Safe+0Safe_safe+safe_208974.706+210809.6260	1384
0Safe+0Safe_safe+safe_208974.706+210925.6376	975
0Safe+0Safe_safe+safe_208974.706+210935.6386	1401
0Safe+0Safe_safe+safe_208974.706+210946.6397	1426
0Safe+0Safe_safe+safe_208974.706+211135.6586	1671
0Safe+0Safe_safe+safe_209014.742+209014.742	379
0Safe+0Safe_safe+safe_209014.742+209157.3858	1109
0Safe+0Safe_safe+safe_209014.742+209400.4101	946
0Safe+0Safe_safe+safe_209014.742+209597.4298	1332
0Safe+0Safe_safe+safe_209014.742+209963.3164	1104
0Safe+0Safe_safe+safe_209014.742+209973.3174	1486
0Safe+0Safe_safe+safe_209014.742+209990.3191	977
0Safe+0Safe_safe+safe_209014.742+210140.3341	1665
0Safe+0Safe_safe+safe_209014.742+210313.3514	914
0Safe+0Safe_safe+safe_209014.742+210540.3741	924
0Safe+0Safe_safe+safe_209014.742+210725.6176	961
0Safe+0Safe_safe+safe_209014.742+210743.6194	963
0Safe+0Safe_safe+safe_209014.742+210809.6260	945
0Safe+0Safe_safe+safe_209014.742+210925.6376	1035
0Safe+0Safe_safe+safe_209014.742+210935.6386	1107
0Safe+0Safe_safe+safe_209014.742+210946.6397	1270
0Safe+0Safe_safe+safe_209014.742+211135.6586	949
0Safe+0Safe_safe+safe_209157.3858+209157.3858	811
0Safe+0Safe_safe+safe_209157.3858+209400.4101	1329
0Safe+0Safe_safe+safe_209157.3858+209597.4298	1830
0Safe+0Safe_safe+safe_209157.3858+209963.3164	1744
0Safe+0Safe_safe+safe_209157.3858+209973.3174	2085
0Safe+0Safe_safe+safe_209157.3858+209990.3191	1219
0Safe+0Safe_safe+safe_209157.3858+210140.3341	1839
0Safe+0Safe_safe+safe_209157.3858+210313.3514	1140
0Safe+0Safe_safe+safe_209157.3858+210540.3741	1732
0Safe+0Safe_safe+safe_209157.3858+210725.6176	1048
0Safe+0Safe_safe+safe_209157.3858+210743.6194	1405
0Safe+0Safe_safe+safe_209157.3858+210809.6260	1393
0Safe+0Safe_safe+safe_209157.3858+210925.6376	1062
0Safe+0Safe_safe+safe_209157.3858+210935.6386	1328
0Safe+0Safe_safe+safe_209157.3858+210946.6397	1421
0Safe+0Safe_safe+safe_209157.3858+211135.6586	1236
0Safe+0Safe_safe+safe_209400.4101+209400.4101	458
0Safe+0Safe_safe+safe_209400.4101+209597.4298	1330
0Safe+0Safe_safe+safe_209400.4101+209963.3164	1648
0Safe+0Safe_safe+safe_209400.4101+209973.3174	1872
0Safe+0Safe_safe+safe_209400.4101+209990.3191	1354
0Safe+0Safe_safe+safe_209400.4101+210140.3341	1919
0Safe+0Safe_safe+safe_209400.4101+210313.3514	1247
0Safe+0Safe_safe+safe_209400.4101+210540.3741	1636
0Safe+0Safe_safe+safe_209400.4101+210725.6176	1106
0Safe+0Safe_safe+safe_209400.4101+210743.6194	986
0Safe+0Safe_safe+safe_209400.4101+210809.6260	1279
0Safe+0Safe_safe+safe_209400.4101+210925.6376	1174
0Safe+0Safe_safe+safe_209400.4101+210935.6386	1026
0Safe+0Safe_safe+safe_209400.4101+210946.6397	1171
0Safe+0Safe_safe+safe_209400.4101+211135.6586	943
0Safe+0Safe_safe+safe_209597.4298+209597.4298	433
0Safe+0Safe_safe+safe_209597.4298+209963.3164	1438
0Safe+0Safe_safe+safe_209597.4298+209973.3174	1671
0Safe+0Safe_safe+safe_209597.4298+209990.3191	1188
0Safe+0Safe_safe+safe_209597.4298+210140.3341	1764
0Safe+0Safe_safe+safe_209597.4298+210313.3514	1109
0Safe+0Safe_safe+safe_209597.4298+210540.3741	1570
0Safe+0Safe_safe+safe_209597.4298+210725.6176	918
0Safe+0Safe_safe+safe_209597.4298+210743.6194	1385
0Safe+0Safe_safe+safe_209597.4298+210809.6260	1182
0Safe+0Safe_safe+safe_209597.4298+210925.6376	785
0Safe+0Safe_safe+safe_209597.4298+210935.6386	1107
0Safe+0Safe_safe+safe_209597.4298+210946.6397	1259
0Safe+0Safe_safe+safe_209597.4298+211135.6586	1113
0Safe+0Safe_safe+safe_209963.3164+209963.3164	438
0Safe+0Safe_safe+safe_209963.3164+209973.3174	1911
0Safe+0Safe_safe+safe_209963.3164+209990.3191	1066
0Safe+0Safe_safe+safe_209963.3164+210140.3341	1668
0Safe+0Safe_safe+safe_209963.3164+210313.3514	1240
0Safe+0Safe_safe+safe_209963.3164+210540.3741	1228
0Safe+0Safe_safe+safe_209963.3164+210725.6176	1151
0Safe+0Safe_safe+safe_209963.3164+210743.6194	991
0Safe+0Safe_safe+safe_209963.3164+210809.6260	1286
0Safe+0Safe_safe+safe_209963.3164+210925.6376	1027
0Safe+0Safe_safe+safe_209963.3164+210935.6386	1167
0Safe+0Safe_safe+safe_209963.3164+210946.6397	1502
0Safe+0Safe_safe+safe_209963.3164+211135.6586	1122
0Safe+0Safe_safe+safe_209973.3174+209973.3174	698
0Safe+0Safe_safe+safe_209973.3174+209990.3191	1380
0Safe+0Safe_safe+safe_209973.3174+210140.3341	1879
0Safe+0Safe_safe+safe_209973.3174+210313.3514	1467
0Safe+0Safe_safe+safe_209973.3174+210540.3741	2149
0Safe+0Safe_safe+safe_209973.3174+210725.6176	1875
0Safe+0Safe_safe+safe_209973.3174+210743.6194	1543
0Safe+0Safe_safe+safe_209973.3174+210809.6260	1343
0Safe+0Safe_safe+safe_209973.3174+210925.6376	1579
0Safe+0Safe_safe+safe_209973.3174+210935.6386	1348
0Safe+0Safe_safe+safe_209973.3174+210946.6397	1636
0Safe+0Safe_safe+safe_209973.3174+211135.6586	1603
0Safe+0Safe_safe+safe_209990.3191+209990.3191	365
0Safe+0Safe_safe+safe_209990.3191+210140.3341	1481
0Safe+0Safe_safe+safe_209990.3191+210313.3514	944
0Safe+0Safe_safe+safe_209990.3191+210540.3741	1005
0Safe+0Safe_safe+safe_209990.3191+210725.6176	883
0Safe+0Safe_safe+safe_209990.3191+210743.6194	1074
0Safe+0Safe_safe+safe_209990.3191+210809.6260	950
0Safe+0Safe_safe+safe_209990.3191+210925.6376	1050
0Safe+0Safe_safe+safe_209990.3191+210935.6386	1012
0Safe+0Safe_safe+safe_209990.3191+210946.6397	1272
0Safe+0Safe_safe+safe_209990.3191+211135.6586	846
0Safe+0Safe_safe+safe_210140.3341+210140.3341	634
0Safe+0Safe_safe+safe_210140.3341+210313.3514	1408
0Safe+0Safe_safe+safe_210140.3341+210540.3741	1918
0Safe+0Safe_safe+safe_210140.3341+210725.6176	1646
0Safe+0Safe_safe+safe_210140.3341+210743.6194	1618
0Safe+0Safe_safe+safe_210140.3341+210809.6260	1383
0Safe+0Safe_safe+safe_210140.3341+210925.6376	1421
0Safe+0Safe_safe+safe_210140.3341+210935.6386	1545
0Safe+0Safe_safe+safe_210140.3341+210946.6397	1761
0Safe+0Safe_safe+safe_210140.3341+211135.6586	1536
0Safe+0Safe_safe+safe_210313.3514+210313.3514	532
0Safe+0Safe_safe+safe_210313.3514+210540.3741	1227
0Safe+0Safe_safe+safe_210313.3514+210725.6176	1325
0Safe+0Safe_safe+safe_210313.3514+210743.6194	967
0Safe+0Safe_safe+safe_210313.3514+210809.6260	989
0Safe+0Safe_safe+safe_210313.3514+210925.6376	1013
0Safe+0Safe_safe+safe_210313.3514+210935.6386	1094
0Safe+0Safe_safe+safe_210313.3514+210946.6397	1270
0Safe+0Safe_safe+safe_210313.3514+211135.6586	835
0Safe+0Safe_safe+safe_210540.3741+210540.3741	322
0Safe+0Safe_safe+safe_210540.3741+210725.6176	1310
0Safe+0Safe_safe+safe_210540.3741+210743.6194	1138
0Safe+0Safe_safe+safe_210540.3741+210809.6260	1362
0Safe+0Safe_safe+safe_210540.3741+210925.6376	1023
0Safe+0Safe_safe+safe_210540.3741+210935.6386	1278
0Safe+0Safe_safe+safe_210540.3741+210946.6397	1611
0Safe+0Safe_safe+safe_210540.3741+211135.6586	1234
0Safe+0Safe_safe+safe_210725.6176+210725.6176	198
0Safe+0Safe_safe+safe_210725.6176+210743.6194	999
0Safe+0Safe_safe+safe_210725.6176+210809.6260	1016
0Safe+0Safe_safe+safe_210725.6176+210925.6376	1154
0Safe+0Safe_safe+safe_210725.6176+210935.6386	1191
0Safe+0Safe_safe+safe_210725.6176+210946.6397	1019
0Safe+0Safe_safe+safe_210725.6176+211135.6586	1052
0Safe+0Safe_safe+safe_210743.6194+210743.6194	717
0Safe+0Safe_safe+safe_210743.6194+210809.6260	939
0Safe+0Safe_safe+safe_210743.6194+210925.6376	922
0Safe+0Safe_safe+safe_210743.6194+210935.6386	959
0Safe+0Safe_safe+safe_210743.6194+210946.6397	1016
0Safe+0Safe_safe+safe_210743.6194+211135.6586	1114
0Safe+0Safe_safe+safe_210809.6260+210809.6260	289
0Safe+0Safe_safe+safe_210809.6260+210925.6376	805
0Safe+0Safe_safe+safe_210809.6260+210935.6386	1122
0Safe+0Safe_safe+safe_210809.6260+210946.6397	1246
0Safe+0Safe_safe+safe_210809.6260+211135.6586	1032
0Safe+0Safe_safe+safe_210925.6376+210925.6376	412
0Safe+0Safe_safe+safe_210925.6376+210935.6386	889
0Safe+0Safe_safe+safe_210925.6376+210946.6397	1202
0Safe+0Safe_safe+safe_210925.6376+211135.6586	1021
0Safe+0Safe_safe+safe_210935.6386+210935.6386	448
0Safe+0Safe_safe+safe_210935.6386+210946.6397	1346
0Safe+0Safe_safe+safe_210935.6386+211135.6586	913
0Safe+0Safe_safe+safe_210946.6397+210946.6397	508
0Safe+0Safe_safe+safe_210946.6397+211135.6586	1249
0Safe+0Safe_safe+safe_211135.6586+211135.6586	433
AKAP9+AKAP9_P1P2+P1P2_5225+5225	200
AKAP9+AKAP9_P1P2+P1P2_5225+5229	999
AKAP9+AKAP9_P1P2+P1P2_5225+5230	479
AKAP9+AKAP9_P1P2+P1P2_5229+5229	213
AKAP9+AKAP9_P1P2+P1P2_5229+5230	423
AKAP9+AKAP9_P1P2+P1P2_5230+5230	169
AKAP9+ANAPC2_P1P2+P1P2_5225+6711	443
AKAP9+ANAPC2_P1P2+P1P2_5225+6716	535
AKAP9+ANAPC2_P1P2+P1P2_5225+6719	24
AKAP9+ANAPC2_P1P2+P1P2_5229+6711	247
AKAP9+ANAPC2_P1P2+P1P2_5229+6716	303
AKAP9+ANAPC2_P1P2+P1P2_5229+6719	36
AKAP9+ANAPC2_P1P2+P1P2_5230+6711	289
AKAP9+ANAPC2_P1P2+P1P2_5230+6716	471
AKAP9+ANAPC2_P1P2+P1P2_5230+6719	77
AKAP9+AP1M1_P1P2+P1P2_5225+8191	716
AKAP9+AP1M1_P1P2+P1P2_5225+8195	640
AKAP9+AP1M1_P1P2+P1P2_5225+8199	944
AKAP9+AP1M1_P1P2+P1P2_5229+8191	384
AKAP9+AP1M1_P1P2+P1P2_5229+8195	751
AKAP9+AP1M1_P1P2+P1P2_5229+8199	660
AKAP9+AP1M1_P1P2+P1P2_5230+8191	385
AKAP9+AP1M1_P1P2+P1P2_5230+8195	686
AKAP9+AP1M1_P1P2+P1P2_5230+8199	466
AKAP9+AP2A1_P1P2+P1P2_5225+8241	317
AKAP9+AP2A1_P1P2+P1P2_5225+8243	221
AKAP9+AP2A1_P1P2+P1P2_5225+8244	19
AKAP9+AP2A1_P1P2+P1P2_5229+8241	271
AKAP9+AP2A1_P1P2+P1P2_5229+8243	182
AKAP9+AP2A1_P1P2+P1P2_5229+8244	18
AKAP9+AP2A1_P1P2+P1P2_5230+8241	283
AKAP9+AP2A1_P1P2+P1P2_5230+8243	168
AKAP9+AP2A1_P1P2+P1P2_5230+8244	42
AKAP9+ARL1_P1P2+P1P2_10491+5225	170
AKAP9+ARL1_P1P2+P1P2_10491+5229	65
AKAP9+ARL1_P1P2+P1P2_10491+5230	130
AKAP9+ARL1_P1P2+P1P2_10492+5225	143
AKAP9+ARL1_P1P2+P1P2_10492+5229	206
AKAP9+ARL1_P1P2+P1P2_10492+5230	118
AKAP9+ARL1_P1P2+P1P2_10498+5225	682
AKAP9+ARL1_P1P2+P1P2_10498+5229	414
AKAP9+ARL1_P1P2+P1P2_10498+5230	507
AKAP9+ASNA1_P1P2+P1P2_11971+5225	284
AKAP9+ASNA1_P1P2+P1P2_11971+5229	260
AKAP9+ASNA1_P1P2+P1P2_11971+5230	219
AKAP9+ASNA1_P1P2+P1P2_11973+5225	133
AKAP9+ASNA1_P1P2+P1P2_11973+5229	106
AKAP9+ASNA1_P1P2+P1P2_11973+5230	102
AKAP9+ASNA1_P1P2+P1P2_11977+5225	452
AKAP9+ASNA1_P1P2+P1P2_11977+5229	269
AKAP9+ASNA1_P1P2+P1P2_11977+5230	222
AKAP9+ATP5A1_P1+P1P2_13072+5225	130
AKAP9+ATP5A1_P1+P1P2_13072+5229	85
AKAP9+ATP5A1_P1+P1P2_13072+5230	122
AKAP9+ATP5A1_P1+P1P2_13073+5225	324
AKAP9+ATP5A1_P1+P1P2_13073+5229	348
AKAP9+ATP5A1_P1+P1P2_13073+5230	309
AKAP9+ATP5A1_P1+P1P2_13076+5225	382
AKAP9+ATP5A1_P1+P1P2_13076+5229	194
AKAP9+ATP5A1_P1+P1P2_13076+5230	325
AKAP9+ATP5B_P1P2+P1P2_13092+5225	83
AKAP9+ATP5B_P1P2+P1P2_13092+5229	86
AKAP9+ATP5B_P1P2+P1P2_13092+5230	31
AKAP9+ATP5B_P1P2+P1P2_13096+5225	82
AKAP9+ATP5B_P1P2+P1P2_13096+5229	107
AKAP9+ATP5B_P1P2+P1P2_13096+5230	53
AKAP9+ATP5B_P1P2+P1P2_13098+5225	86
AKAP9+ATP5B_P1P2+P1P2_13098+5229	45
AKAP9+ATP5B_P1P2+P1P2_13098+5230	39
AKAP9+BAG6_P1P2+P1P2_14691+5225	963
AKAP9+BAG6_P1P2+P1P2_14691+5229	673
AKAP9+BAG6_P1P2+P1P2_14691+5230	569
AKAP9+BAG6_P1P2+P1P2_14692+5225	48
AKAP9+BAG6_P1P2+P1P2_14692+5229	102
AKAP9+BAG6_P1P2+P1P2_14692+5230	42
AKAP9+BAG6_P1P2+P1P2_14694+5225	868
AKAP9+BAG6_P1P2+P1P2_14694+5229	860
AKAP9+BAG6_P1P2+P1P2_14694+5230	869
AKAP9+CAMLG_P1P2+P1P2_25801+5225	800
AKAP9+CAMLG_P1P2+P1P2_25801+5229	716
AKAP9+CAMLG_P1P2+P1P2_25801+5230	448
AKAP9+CAMLG_P1P2+P1P2_25802+5225	257
AKAP9+CAMLG_P1P2+P1P2_25802+5229	236
AKAP9+CAMLG_P1P2+P1P2_25802+5230	146
AKAP9+CAMLG_P1P2+P1P2_25803+5225	132
AKAP9+CAMLG_P1P2+P1P2_25803+5229	64
AKAP9+CAMLG_P1P2+P1P2_25803+5230	98
AKAP9+CCNA2_P1P2+P1P2_29242+5225	353
AKAP9+CCNA2_P1P2+P1P2_29242+5229	278
AKAP9+CCNA2_P1P2+P1P2_29242+5230	280
AKAP9+CCNA2_P1P2+P1P2_29248+5225	242
AKAP9+CCNA2_P1P2+P1P2_29248+5229	223
AKAP9+CCNA2_P1P2+P1P2_29248+5230	205
AKAP9+CCNA2_P1P2+P1P2_29250+5225	105
AKAP9+CCNA2_P1P2+P1P2_29250+5229	137
AKAP9+CCNA2_P1P2+P1P2_29250+5230	82
AKAP9+CCT3_P1P2+P1P2_29751+5225	6
AKAP9+CCT3_P1P2+P1P2_29751+5229	11
AKAP9+CCT3_P1P2+P1P2_29751+5230	1
AKAP9+CCT3_P1P2+P1P2_29755+5225	51
AKAP9+CCT3_P1P2+P1P2_29755+5229	13
AKAP9+CCT3_P1P2+P1P2_29755+5230	18
AKAP9+CCT3_P1P2+P1P2_29758+5225	45
AKAP9+CCT3_P1P2+P1P2_29758+5229	40
AKAP9+CCT3_P1P2+P1P2_29758+5230	121
AKAP9+CCT4_P1P2+P1P2_29763+5225	71
AKAP9+CCT4_P1P2+P1P2_29763+5229	109
AKAP9+CCT4_P1P2+P1P2_29763+5230	77
AKAP9+CCT4_P1P2+P1P2_29768+5225	24
AKAP9+CCT4_P1P2+P1P2_29768+5229	7
AKAP9+CCT4_P1P2+P1P2_29768+5230	41
AKAP9+CCT4_P1P2+P1P2_29770+5225	54
AKAP9+CCT4_P1P2+P1P2_29770+5229	71
AKAP9+CCT4_P1P2+P1P2_29770+5230	53
AKAP9+CHAF1A_P1P2+P1P2_33862+5225	51
AKAP9+CHAF1A_P1P2+P1P2_33862+5229	67
AKAP9+CHAF1A_P1P2+P1P2_33862+5230	65
AKAP9+CHAF1A_P1P2+P1P2_33863+5225	125
AKAP9+CHAF1A_P1P2+P1P2_33863+5229	106
AKAP9+CHAF1A_P1P2+P1P2_33863+5230	53
AKAP9+CHAF1A_P1P2+P1P2_33869+5225	103
AKAP9+CHAF1A_P1P2+P1P2_33869+5229	3
AKAP9+CHAF1A_P1P2+P1P2_33869+5230	34
AKAP9+COG3_P1P2+P1P2_37961+5225	80
AKAP9+COG3_P1P2+P1P2_37961+5229	153
AKAP9+COG3_P1P2+P1P2_37961+5230	56
AKAP9+COG3_P1P2+P1P2_37963+5225	339
AKAP9+COG3_P1P2+P1P2_37963+5229	229
AKAP9+COG3_P1P2+P1P2_37963+5230	291
AKAP9+COG3_P1P2+P1P2_37964+5225	36
AKAP9+COG3_P1P2+P1P2_37964+5229	68
AKAP9+COG3_P1P2+P1P2_37964+5230	61
AKAP9+COG4_P1P2+P1P2_37974+5225	108
AKAP9+COG4_P1P2+P1P2_37974+5229	195
AKAP9+COG4_P1P2+P1P2_37974+5230	141
AKAP9+COG4_P1P2+P1P2_37976+5225	265
AKAP9+COG4_P1P2+P1P2_37976+5229	173
AKAP9+COG4_P1P2+P1P2_37976+5230	126
AKAP9+COG4_P1P2+P1P2_37980+5225	661
AKAP9+COG4_P1P2+P1P2_37980+5229	551
AKAP9+COG4_P1P2+P1P2_37980+5230	551
AKAP9+COPA_P1P2+P1P2_38732+5225	16
AKAP9+COPA_P1P2+P1P2_38732+5229	9
AKAP9+COPA_P1P2+P1P2_38732+5230	11
AKAP9+COPA_P1P2+P1P2_38734+5225	83
AKAP9+COPA_P1P2+P1P2_38734+5229	139
AKAP9+COPA_P1P2+P1P2_38734+5230	34
AKAP9+COPA_P1P2+P1P2_38738+5225	412
AKAP9+COPA_P1P2+P1P2_38738+5229	284
AKAP9+COPA_P1P2+P1P2_38738+5230	335
AKAP9+COPB1_P1P2+P1P2_38741+5229	4
AKAP9+COPB1_P1P2+P1P2_38741+5230	2
AKAP9+COPB1_P1P2+P1P2_38742+5225	23
AKAP9+COPB1_P1P2+P1P2_38742+5229	16
AKAP9+COPB1_P1P2+P1P2_38742+5230	6
AKAP9+COPB1_P1P2+P1P2_38743+5225	64
AKAP9+COPB1_P1P2+P1P2_38743+5229	14
AKAP9+COPB1_P1P2+P1P2_38743+5230	55
AKAP9+COPS4_P1P2+P1P2_38833+5225	185
AKAP9+COPS4_P1P2+P1P2_38833+5229	249
AKAP9+COPS4_P1P2+P1P2_38833+5230	81
AKAP9+COPS4_P1P2+P1P2_38834+5225	341
AKAP9+COPS4_P1P2+P1P2_38834+5229	433
AKAP9+COPS4_P1P2+P1P2_38834+5230	199
AKAP9+COPS4_P1P2+P1P2_38835+5225	198
AKAP9+COPS4_P1P2+P1P2_38835+5229	139
AKAP9+COPS4_P1P2+P1P2_38835+5230	144
AKAP9+COX7C_P1P2+P1P2_39372+5225	180
AKAP9+COX7C_P1P2+P1P2_39372+5229	214
AKAP9+COX7C_P1P2+P1P2_39372+5230	73
AKAP9+COX7C_P1P2+P1P2_39375+5225	72
AKAP9+COX7C_P1P2+P1P2_39375+5229	104
AKAP9+COX7C_P1P2+P1P2_39375+5230	100
AKAP9+COX7C_P1P2+P1P2_39376+5225	503
AKAP9+COX7C_P1P2+P1P2_39376+5229	349
AKAP9+COX7C_P1P2+P1P2_39376+5230	446
AKAP9+DCAF13_P1P2+P1P2_44661+5225	104
AKAP9+DCAF13_P1P2+P1P2_44661+5229	53
AKAP9+DCAF13_P1P2+P1P2_44661+5230	72
AKAP9+DCAF13_P1P2+P1P2_44662+5225	135
AKAP9+DCAF13_P1P2+P1P2_44662+5229	62
AKAP9+DCAF13_P1P2+P1P2_44662+5230	79
AKAP9+DCAF13_P1P2+P1P2_44668+5225	62
AKAP9+DCAF13_P1P2+P1P2_44668+5229	28
AKAP9+DCAF13_P1P2+P1P2_44668+5230	65
AKAP9+DCTN1_P1P2+P1P2_45121+5225	160
AKAP9+DCTN1_P1P2+P1P2_45121+5229	69
AKAP9+DCTN1_P1P2+P1P2_45121+5230	48
AKAP9+DCTN1_P1P2+P1P2_45122+5225	135
AKAP9+DCTN1_P1P2+P1P2_45122+5229	113
AKAP9+DCTN1_P1P2+P1P2_45122+5230	55
AKAP9+DCTN1_P1P2+P1P2_45130+5225	626
AKAP9+DCTN1_P1P2+P1P2_45130+5229	480
AKAP9+DCTN1_P1P2+P1P2_45130+5230	584
AKAP9+EIF3A_P1P2+P1P2_5225+53046	51
AKAP9+EIF3A_P1P2+P1P2_5225+53047	340
AKAP9+EIF3A_P1P2+P1P2_5225+53050	405
AKAP9+EIF3A_P1P2+P1P2_5229+53046	40
AKAP9+EIF3A_P1P2+P1P2_5229+53047	335
AKAP9+EIF3A_P1P2+P1P2_5229+53050	335
AKAP9+EIF3A_P1P2+P1P2_5230+53046	33
AKAP9+EIF3A_P1P2+P1P2_5230+53047	156
AKAP9+EIF3A_P1P2+P1P2_5230+53050	308
AKAP9+EIF3D_P1P2+P1P2_5225+53082	102
AKAP9+EIF3D_P1P2+P1P2_5225+53087	41
AKAP9+EIF3D_P1P2+P1P2_5225+53090	106
AKAP9+EIF3D_P1P2+P1P2_5229+53082	40
AKAP9+EIF3D_P1P2+P1P2_5229+53087	37
AKAP9+EIF3D_P1P2+P1P2_5229+53090	69
AKAP9+EIF3D_P1P2+P1P2_5230+53082	37
AKAP9+EIF3D_P1P2+P1P2_5230+53087	20
AKAP9+EIF3D_P1P2+P1P2_5230+53090	93
AKAP9+EIF3H_P1P2+P1P2_5225+53121	56
AKAP9+EIF3H_P1P2+P1P2_5225+53124	174
AKAP9+EIF3H_P1P2+P1P2_5225+53128	103
AKAP9+EIF3H_P1P2+P1P2_5229+53121	42
AKAP9+EIF3H_P1P2+P1P2_5229+53124	175
AKAP9+EIF3H_P1P2+P1P2_5229+53128	23
AKAP9+EIF3H_P1P2+P1P2_5230+53121	18
AKAP9+EIF3H_P1P2+P1P2_5230+53124	56
AKAP9+EIF3H_P1P2+P1P2_5230+53128	91
AKAP9+EIF3L_P1P2+P1P2_5225+53161	542
AKAP9+EIF3L_P1P2+P1P2_5225+53164	511
AKAP9+EIF3L_P1P2+P1P2_5225+53165	697
AKAP9+EIF3L_P1P2+P1P2_5229+53161	375
AKAP9+EIF3L_P1P2+P1P2_5229+53164	404
AKAP9+EIF3L_P1P2+P1P2_5229+53165	565
AKAP9+EIF3L_P1P2+P1P2_5230+53161	482
AKAP9+EIF3L_P1P2+P1P2_5230+53164	400
AKAP9+EIF3L_P1P2+P1P2_5230+53165	476
AKAP9+EIF6_P1P2+P1P2_5225+53432	72
AKAP9+EIF6_P1P2+P1P2_5225+53433	195
AKAP9+EIF6_P1P2+P1P2_5225+53434	230
AKAP9+EIF6_P1P2+P1P2_5229+53432	90
AKAP9+EIF6_P1P2+P1P2_5229+53433	160
AKAP9+EIF6_P1P2+P1P2_5229+53434	261
AKAP9+EIF6_P1P2+P1P2_5230+53432	34
AKAP9+EIF6_P1P2+P1P2_5230+53433	260
AKAP9+EIF6_P1P2+P1P2_5230+53434	190
AKAP9+ERP44_P1P2+P1P2_5225+55852	866
AKAP9+ERP44_P1P2+P1P2_5225+55853	585
AKAP9+ERP44_P1P2+P1P2_5225+55856	931
AKAP9+ERP44_P1P2+P1P2_5229+55852	659
AKAP9+ERP44_P1P2+P1P2_5229+55853	394
AKAP9+ERP44_P1P2+P1P2_5229+55856	589
AKAP9+ERP44_P1P2+P1P2_5230+55852	627
AKAP9+ERP44_P1P2+P1P2_5230+55853	407
AKAP9+ERP44_P1P2+P1P2_5230+55856	723
AKAP9+GET4_P1P2+P1P2_5225+68261	532
AKAP9+GET4_P1P2+P1P2_5225+68262	757
AKAP9+GET4_P1P2+P1P2_5225+68263	891
AKAP9+GET4_P1P2+P1P2_5229+68261	581
AKAP9+GET4_P1P2+P1P2_5229+68262	799
AKAP9+GET4_P1P2+P1P2_5229+68263	810
AKAP9+GET4_P1P2+P1P2_5230+68261	632
AKAP9+GET4_P1P2+P1P2_5230+68262	517
AKAP9+GET4_P1P2+P1P2_5230+68263	472
AKAP9+GMDS_P1P2+P1P2_5225+69971	971
AKAP9+GMDS_P1P2+P1P2_5225+69973	647
AKAP9+GMDS_P1P2+P1P2_5225+69979	574
AKAP9+GMDS_P1P2+P1P2_5229+69971	622
AKAP9+GMDS_P1P2+P1P2_5229+69973	627
AKAP9+GMDS_P1P2+P1P2_5229+69979	687
AKAP9+GMDS_P1P2+P1P2_5230+69971	348
AKAP9+GMDS_P1P2+P1P2_5230+69973	449
AKAP9+GMDS_P1P2+P1P2_5230+69979	438
AKAP9+GOLIM4_P1P2+P1P2_5225+70816	714
AKAP9+GOLIM4_P1P2+P1P2_5225+70817	889
AKAP9+GOLIM4_P1P2+P1P2_5225+70818	697
AKAP9+GOLIM4_P1P2+P1P2_5229+70816	536
AKAP9+GOLIM4_P1P2+P1P2_5229+70817	952
AKAP9+GOLIM4_P1P2+P1P2_5229+70818	556
AKAP9+GOLIM4_P1P2+P1P2_5230+70816	442
AKAP9+GOLIM4_P1P2+P1P2_5230+70817	753
AKAP9+GOLIM4_P1P2+P1P2_5230+70818	665
AKAP9+HNRNPK_P1P2+P1P2_5225+78784	338
AKAP9+HNRNPK_P1P2+P1P2_5225+78785	301
AKAP9+HNRNPK_P1P2+P1P2_5225+78786	116
AKAP9+HNRNPK_P1P2+P1P2_5229+78784	304
AKAP9+HNRNPK_P1P2+P1P2_5229+78785	246
AKAP9+HNRNPK_P1P2+P1P2_5229+78786	44
AKAP9+HNRNPK_P1P2+P1P2_5230+78784	373
AKAP9+HNRNPK_P1P2+P1P2_5230+78785	294
AKAP9+HNRNPK_P1P2+P1P2_5230+78786	46
AKAP9+IFFO1_P1+P1P2_5225+81592	450
AKAP9+IFFO1_P1+P1P2_5225+81594	1048
AKAP9+IFFO1_P1+P1P2_5225+81595	78
AKAP9+IFFO1_P1+P1P2_5229+81592	508
AKAP9+IFFO1_P1+P1P2_5229+81594	532
AKAP9+IFFO1_P1+P1P2_5229+81595	71
AKAP9+IFFO1_P1+P1P2_5230+81592	717
AKAP9+IFFO1_P1+P1P2_5230+81594	575
AKAP9+IFFO1_P1+P1P2_5230+81595	91
AKAP9+KDM1A_P1P2+P1P2_5225+88511	101
AKAP9+KDM1A_P1P2+P1P2_5225+88513	54
AKAP9+KDM1A_P1P2+P1P2_5225+88515	244
AKAP9+KDM1A_P1P2+P1P2_5229+88511	37
AKAP9+KDM1A_P1P2+P1P2_5229+88513	79
AKAP9+KDM1A_P1P2+P1P2_5229+88515	303
AKAP9+KDM1A_P1P2+P1P2_5230+88511	44
AKAP9+KDM1A_P1P2+P1P2_5230+88513	87
AKAP9+KDM1A_P1P2+P1P2_5230+88515	113
AKAP9+MGAT5_P1P2+P1P2_105113+5225	781
AKAP9+MGAT5_P1P2+P1P2_105113+5229	462
AKAP9+MGAT5_P1P2+P1P2_105113+5230	401
AKAP9+MGAT5_P1P2+P1P2_105114+5225	900
AKAP9+MGAT5_P1P2+P1P2_105114+5229	999
AKAP9+MGAT5_P1P2+P1P2_105114+5230	545
AKAP9+MGAT5_P1P2+P1P2_105119+5225	635
AKAP9+MGAT5_P1P2+P1P2_105119+5229	763
AKAP9+MGAT5_P1P2+P1P2_105119+5230	389
AKAP9+MRPL51_P1P2+P1P2_108171+5225	239
AKAP9+MRPL51_P1P2+P1P2_108171+5229	246
AKAP9+MRPL51_P1P2+P1P2_108171+5230	245
AKAP9+MRPL51_P1P2+P1P2_108173+5225	191
AKAP9+MRPL51_P1P2+P1P2_108173+5229	80
AKAP9+MRPL51_P1P2+P1P2_108173+5230	71
AKAP9+MRPL51_P1P2+P1P2_108180+5225	214
AKAP9+MRPL51_P1P2+P1P2_108180+5229	211
AKAP9+MRPL51_P1P2+P1P2_108180+5230	113
AKAP9+MRPL54_P1P2+P1P2_108201+5225	167
AKAP9+MRPL54_P1P2+P1P2_108201+5229	230
AKAP9+MRPL54_P1P2+P1P2_108201+5230	94
AKAP9+MRPL54_P1P2+P1P2_108202+5225	230
AKAP9+MRPL54_P1P2+P1P2_108202+5229	199
AKAP9+MRPL54_P1P2+P1P2_108202+5230	182
AKAP9+MRPL54_P1P2+P1P2_108203+5225	140
AKAP9+MRPL54_P1P2+P1P2_108203+5229	153
AKAP9+MRPL54_P1P2+P1P2_108203+5230	72
AKAP9+MYBL2_P1P2+P1P2_110503+5225	62
AKAP9+MYBL2_P1P2+P1P2_110503+5229	27
AKAP9+MYBL2_P1P2+P1P2_110503+5230	13
AKAP9+MYBL2_P1P2+P1P2_110504+5225	115
AKAP9+MYBL2_P1P2+P1P2_110504+5229	178
AKAP9+MYBL2_P1P2+P1P2_110504+5230	114
AKAP9+MYBL2_P1P2+P1P2_110508+5225	182
AKAP9+MYBL2_P1P2+P1P2_110508+5229	58
AKAP9+MYBL2_P1P2+P1P2_110508+5230	13
AKAP9+NAA25_P1P2+P1P2_111815+5225	30
AKAP9+NAA25_P1P2+P1P2_111815+5229	77
AKAP9+NAA25_P1P2+P1P2_111815+5230	32
AKAP9+NAA25_P1P2+P1P2_111818+5225	183
AKAP9+NAA25_P1P2+P1P2_111818+5229	147
AKAP9+NAA25_P1P2+P1P2_111818+5230	245
AKAP9+NAA25_P1P2+P1P2_111819+5225	95
AKAP9+NAA25_P1P2+P1P2_111819+5229	78
AKAP9+NAA25_P1P2+P1P2_111819+5230	73
AKAP9+PPP1R8_P1P2+P1P2_137244+5225	292
AKAP9+PPP1R8_P1P2+P1P2_137244+5229	126
AKAP9+PPP1R8_P1P2+P1P2_137244+5230	164
AKAP9+PPP1R8_P1P2+P1P2_137245+5225	111
AKAP9+PPP1R8_P1P2+P1P2_137245+5229	110
AKAP9+PPP1R8_P1P2+P1P2_137245+5230	55
AKAP9+PPP1R8_P1P2+P1P2_137246+5225	301
AKAP9+PPP1R8_P1P2+P1P2_137246+5229	332
AKAP9+PPP1R8_P1P2+P1P2_137246+5230	237
AKAP9+PRPF39_P1P2+P1P2_139311+5225	238
AKAP9+PRPF39_P1P2+P1P2_139311+5229	203
AKAP9+PRPF39_P1P2+P1P2_139311+5230	160
AKAP9+PRPF39_P1P2+P1P2_139314+5225	274
AKAP9+PRPF39_P1P2+P1P2_139314+5229	212
AKAP9+PRPF39_P1P2+P1P2_139314+5230	259
AKAP9+PRPF39_P1P2+P1P2_139317+5225	123
AKAP9+PRPF39_P1P2+P1P2_139317+5229	101
AKAP9+PRPF39_P1P2+P1P2_139317+5230	97
AKAP9+PSMA7_P1P2+P1P2_140543+5225	39
AKAP9+PSMA7_P1P2+P1P2_140543+5229	91
AKAP9+PSMA7_P1P2+P1P2_140543+5230	79
AKAP9+PSMA7_P1P2+P1P2_140545+5225	120
AKAP9+PSMA7_P1P2+P1P2_140545+5229	149
AKAP9+PSMA7_P1P2+P1P2_140545+5230	49
AKAP9+PSMA7_P1P2+P1P2_140550+5225	88
AKAP9+PSMA7_P1P2+P1P2_140550+5229	65
AKAP9+PSMA7_P1P2+P1P2_140550+5230	13
AKAP9+PSMB6_P1+P1P2_140631+5225	81
AKAP9+PSMB6_P1+P1P2_140631+5229	74
AKAP9+PSMB6_P1+P1P2_140631+5230	16
AKAP9+PSMB6_P1+P1P2_140632+5225	47
AKAP9+PSMB6_P1+P1P2_140632+5229	20
AKAP9+PSMB6_P1+P1P2_140632+5230	14
AKAP9+PSMB6_P1+P1P2_140633+5225	32
AKAP9+PSMB6_P1+P1P2_140633+5229	26
AKAP9+PSMB6_P1+P1P2_140633+5230	31
AKAP9+PSMC1_P1P2+P1P2_140694+5225	150
AKAP9+PSMC1_P1P2+P1P2_140694+5229	102
AKAP9+PSMC1_P1P2+P1P2_140694+5230	110
AKAP9+PSMC1_P1P2+P1P2_140698+5225	189
AKAP9+PSMC1_P1P2+P1P2_140698+5229	195
AKAP9+PSMC1_P1P2+P1P2_140698+5230	113
AKAP9+PSMC1_P1P2+P1P2_140699+5225	443
AKAP9+PSMC1_P1P2+P1P2_140699+5229	395
AKAP9+PSMC1_P1P2+P1P2_140699+5230	301
AKAP9+PSMC6_P1P2+P1P2_140752+5225	152
AKAP9+PSMC6_P1P2+P1P2_140752+5229	146
AKAP9+PSMC6_P1P2+P1P2_140752+5230	144
AKAP9+PSMC6_P1P2+P1P2_140754+5225	67
AKAP9+PSMC6_P1P2+P1P2_140754+5229	93
AKAP9+PSMC6_P1P2+P1P2_140754+5230	99
AKAP9+PSMC6_P1P2+P1P2_140756+5225	95
AKAP9+PSMC6_P1P2+P1P2_140756+5229	82
AKAP9+PSMC6_P1P2+P1P2_140756+5230	42
AKAP9+PSMD11_P1P2+P1P2_140781+5225	192
AKAP9+PSMD11_P1P2+P1P2_140781+5229	132
AKAP9+PSMD11_P1P2+P1P2_140781+5230	126
AKAP9+PSMD11_P1P2+P1P2_140782+5225	15
AKAP9+PSMD11_P1P2+P1P2_140782+5229	53
AKAP9+PSMD11_P1P2+P1P2_140782+5230	87
AKAP9+PSMD11_P1P2+P1P2_140783+5225	81
AKAP9+PSMD11_P1P2+P1P2_140783+5229	89
AKAP9+PSMD11_P1P2+P1P2_140783+5230	80
AKAP9+PSMD1_P1P2+P1P2_140762+5225	4
AKAP9+PSMD1_P1P2+P1P2_140762+5229	101
AKAP9+PSMD1_P1P2+P1P2_140762+5230	21
AKAP9+PSMD1_P1P2+P1P2_140765+5225	510
AKAP9+PSMD1_P1P2+P1P2_140765+5229	411
AKAP9+PSMD1_P1P2+P1P2_140765+5230	527
AKAP9+PSMD1_P1P2+P1P2_140766+5225	547
AKAP9+PSMD1_P1P2+P1P2_140766+5229	436
AKAP9+PSMD1_P1P2+P1P2_140766+5230	394
AKAP9+PSMD2_P1P2+P1P2_140827+5225	47
AKAP9+PSMD2_P1P2+P1P2_140827+5229	58
AKAP9+PSMD2_P1P2+P1P2_140827+5230	32
AKAP9+PSMD2_P1P2+P1P2_140829+5225	429
AKAP9+PSMD2_P1P2+P1P2_140829+5229	499
AKAP9+PSMD2_P1P2+P1P2_140829+5230	286
AKAP9+PSMD2_P1P2+P1P2_140830+5225	337
AKAP9+PSMD2_P1P2+P1P2_140830+5229	246
AKAP9+PSMD2_P1P2+P1P2_140830+5230	182
AKAP9+PSMD3_P1P2+P1P2_140835+5225	37
AKAP9+PSMD3_P1P2+P1P2_140835+5229	76
AKAP9+PSMD3_P1P2+P1P2_140835+5230	12
AKAP9+PSMD3_P1P2+P1P2_140836+5225	207
AKAP9+PSMD3_P1P2+P1P2_140836+5229	202
AKAP9+PSMD3_P1P2+P1P2_140836+5230	78
AKAP9+PSMD3_P1P2+P1P2_140837+5225	98
AKAP9+PSMD3_P1P2+P1P2_140837+5229	95
AKAP9+PSMD3_P1P2+P1P2_140837+5230	119
AKAP9+PTPN1_P1P2+P1P2_141802+5225	265
AKAP9+PTPN1_P1P2+P1P2_141802+5229	323
AKAP9+PTPN1_P1P2+P1P2_141802+5230	255
AKAP9+PTPN1_P1P2+P1P2_141809+5225	158
AKAP9+PTPN1_P1P2+P1P2_141809+5229	97
AKAP9+PTPN1_P1P2+P1P2_141809+5230	186
AKAP9+PTPN1_P1P2+P1P2_141810+5225	513
AKAP9+PTPN1_P1P2+P1P2_141810+5229	482
AKAP9+PTPN1_P1P2+P1P2_141810+5230	264
AKAP9+RAB14_P1P2+P1P2_143241+5225	572
AKAP9+RAB14_P1P2+P1P2_143241+5229	542
AKAP9+RAB14_P1P2+P1P2_143241+5230	339
AKAP9+RAB14_P1P2+P1P2_143243+5225	872
AKAP9+RAB14_P1P2+P1P2_143243+5229	709
AKAP9+RAB14_P1P2+P1P2_143243+5230	571
AKAP9+RAB14_P1P2+P1P2_143246+5225	1393
AKAP9+RAB14_P1P2+P1P2_143246+5229	1101
AKAP9+RAB14_P1P2+P1P2_143246+5230	930
AKAP9+RAD21_P1P2+P1P2_144081+5225	285
AKAP9+RAD21_P1P2+P1P2_144081+5229	197
AKAP9+RAD21_P1P2+P1P2_144081+5230	315
AKAP9+RAD21_P1P2+P1P2_144082+5225	456
AKAP9+RAD21_P1P2+P1P2_144082+5229	394
AKAP9+RAD21_P1P2+P1P2_144082+5230	337
AKAP9+RAD21_P1P2+P1P2_144087+5225	192
AKAP9+RAD21_P1P2+P1P2_144087+5229	89
AKAP9+RAD21_P1P2+P1P2_144087+5230	121
AKAP9+RPL35A_P1P2+P1P2_150911+5225	101
AKAP9+RPL35A_P1P2+P1P2_150911+5229	57
AKAP9+RPL35A_P1P2+P1P2_150911+5230	64
AKAP9+RPL35A_P1P2+P1P2_150913+5225	177
AKAP9+RPL35A_P1P2+P1P2_150913+5229	144
AKAP9+RPL35A_P1P2+P1P2_150913+5230	153
AKAP9+RPL35A_P1P2+P1P2_150919+5225	94
AKAP9+RPL35A_P1P2+P1P2_150919+5229	60
AKAP9+RPL35A_P1P2+P1P2_150919+5230	12
AKAP9+RPL35_P1P2+P1P2_150904+5225	770
AKAP9+RPL35_P1P2+P1P2_150904+5229	719
AKAP9+RPL35_P1P2+P1P2_150904+5230	685
AKAP9+RPL35_P1P2+P1P2_150905+5225	169
AKAP9+RPL35_P1P2+P1P2_150905+5229	154
AKAP9+RPL35_P1P2+P1P2_150905+5230	161
AKAP9+RPL35_P1P2+P1P2_150909+5225	250
AKAP9+RPL35_P1P2+P1P2_150909+5229	168
AKAP9+RPL35_P1P2+P1P2_150909+5230	115
AKAP9+RPL4_P1P2+P1P2_151021+5225	85
AKAP9+RPL4_P1P2+P1P2_151021+5229	35
AKAP9+RPL4_P1P2+P1P2_151021+5230	55
AKAP9+RPL4_P1P2+P1P2_151025+5225	84
AKAP9+RPL4_P1P2+P1P2_151025+5229	86
AKAP9+RPL4_P1P2+P1P2_151025+5230	34
AKAP9+RPL4_P1P2+P1P2_151030+5225	63
AKAP9+RPL4_P1P2+P1P2_151030+5229	86
AKAP9+RPL4_P1P2+P1P2_151030+5230	108
AKAP9+RPL7L1_P1P2+P1P2_151088+5225	183
AKAP9+RPL7L1_P1P2+P1P2_151088+5229	121
AKAP9+RPL7L1_P1P2+P1P2_151088+5230	102
AKAP9+RPL7L1_P1P2+P1P2_151089+5225	96
AKAP9+RPL7L1_P1P2+P1P2_151089+5229	113
AKAP9+RPL7L1_P1P2+P1P2_151089+5230	122
AKAP9+RPL7L1_P1P2+P1P2_151090+5225	19
AKAP9+RPL7L1_P1P2+P1P2_151090+5229	57
AKAP9+RPL7L1_P1P2+P1P2_151090+5230	84
AKAP9+RPS6_P1P2+P1P2_151611+5225	3
AKAP9+RPS6_P1P2+P1P2_151611+5229	17
AKAP9+RPS6_P1P2+P1P2_151611+5230	18
AKAP9+RPS6_P1P2+P1P2_151619+5225	78
AKAP9+RPS6_P1P2+P1P2_151619+5229	54
AKAP9+RPS6_P1P2+P1P2_151619+5230	20
AKAP9+RPS6_P1P2+P1P2_151620+5225	84
AKAP9+RPS6_P1P2+P1P2_151620+5229	34
AKAP9+RPS6_P1P2+P1P2_151620+5230	97
AKAP9+RRM1_P1P2+P1P2_151953+5225	22
AKAP9+RRM1_P1P2+P1P2_151953+5229	18
AKAP9+RRM1_P1P2+P1P2_151953+5230	9
AKAP9+RRM1_P1P2+P1P2_151954+5225	53
AKAP9+RRM1_P1P2+P1P2_151954+5229	65
AKAP9+RRM1_P1P2+P1P2_151954+5230	5
AKAP9+RRM1_P1P2+P1P2_151959+5225	97
AKAP9+RRM1_P1P2+P1P2_151959+5229	78
AKAP9+RRM1_P1P2+P1P2_151959+5230	33
AKAP9+RRS1_P1P2+P1P2_152084+5225	26
AKAP9+RRS1_P1P2+P1P2_152084+5229	29
AKAP9+RRS1_P1P2+P1P2_152084+5230	63
AKAP9+RRS1_P1P2+P1P2_152086+5225	41
AKAP9+RRS1_P1P2+P1P2_152086+5229	70
AKAP9+RRS1_P1P2+P1P2_152086+5230	88
AKAP9+RRS1_P1P2+P1P2_152090+5225	77
AKAP9+RRS1_P1P2+P1P2_152090+5229	45
AKAP9+RRS1_P1P2+P1P2_152090+5230	103
AKAP9+RTF1_P1P2+P1P2_152461+5225	88
AKAP9+RTF1_P1P2+P1P2_152461+5229	116
AKAP9+RTF1_P1P2+P1P2_152461+5230	49
AKAP9+RTF1_P1P2+P1P2_152462+5225	61
AKAP9+RTF1_P1P2+P1P2_152462+5229	122
AKAP9+RTF1_P1P2+P1P2_152462+5230	36
AKAP9+RTF1_P1P2+P1P2_152466+5225	69
AKAP9+RTF1_P1P2+P1P2_152466+5229	69
AKAP9+RTF1_P1P2+P1P2_152466+5230	38
AKAP9+SAMM50_P1P2+P1P2_153753+5225	15
AKAP9+SAMM50_P1P2+P1P2_153753+5229	89
AKAP9+SAMM50_P1P2+P1P2_153753+5230	45
AKAP9+SAMM50_P1P2+P1P2_153755+5225	93
AKAP9+SAMM50_P1P2+P1P2_153755+5229	107
AKAP9+SAMM50_P1P2+P1P2_153755+5230	87
AKAP9+SAMM50_P1P2+P1P2_153759+5225	60
AKAP9+SAMM50_P1P2+P1P2_153759+5229	68
AKAP9+SAMM50_P1P2+P1P2_153759+5230	57
AKAP9+SARS_P1P2+P1P2_153918+5225	633
AKAP9+SARS_P1P2+P1P2_153918+5229	498
AKAP9+SARS_P1P2+P1P2_153918+5230	452
AKAP9+SARS_P1P2+P1P2_153919+5225	116
AKAP9+SARS_P1P2+P1P2_153919+5229	76
AKAP9+SARS_P1P2+P1P2_153919+5230	58
AKAP9+SARS_P1P2+P1P2_153920+5225	153
AKAP9+SARS_P1P2+P1P2_153920+5229	88
AKAP9+SARS_P1P2+P1P2_153920+5230	35
AKAP9+SCFD1_P1P2+P1P2_154422+5225	95
AKAP9+SCFD1_P1P2+P1P2_154422+5229	43
AKAP9+SCFD1_P1P2+P1P2_154422+5230	15
AKAP9+SCFD1_P1P2+P1P2_154424+5225	127
AKAP9+SCFD1_P1P2+P1P2_154424+5229	216
AKAP9+SCFD1_P1P2+P1P2_154424+5230	167
AKAP9+SCFD1_P1P2+P1P2_154425+5225	63
AKAP9+SCFD1_P1P2+P1P2_154425+5229	102
AKAP9+SCFD1_P1P2+P1P2_154425+5230	82
AKAP9+SEC22B_P1P2+P1P2_155541+5225	237
AKAP9+SEC22B_P1P2+P1P2_155541+5229	152
AKAP9+SEC22B_P1P2+P1P2_155541+5230	156
AKAP9+SEC22B_P1P2+P1P2_155545+5225	38
AKAP9+SEC22B_P1P2+P1P2_155545+5229	86
AKAP9+SEC22B_P1P2+P1P2_155545+5230	51
AKAP9+SEC22B_P1P2+P1P2_155549+5225	208
AKAP9+SEC22B_P1P2+P1P2_155549+5229	140
AKAP9+SEC22B_P1P2+P1P2_155549+5230	136
AKAP9+SEC23B_P1P2+P1P2_155571+5225	760
AKAP9+SEC23B_P1P2+P1P2_155571+5229	924
AKAP9+SEC23B_P1P2+P1P2_155571+5230	739
AKAP9+SEC23B_P1P2+P1P2_155572+5225	727
AKAP9+SEC23B_P1P2+P1P2_155572+5229	713
AKAP9+SEC23B_P1P2+P1P2_155572+5230	579
AKAP9+SEC23B_P1P2+P1P2_155573+5225	656
AKAP9+SEC23B_P1P2+P1P2_155573+5229	540
AKAP9+SEC23B_P1P2+P1P2_155573+5230	391
AKAP9+SEC23IP_P1P2+P1P2_155583+5225	475
AKAP9+SEC23IP_P1P2+P1P2_155583+5229	687
AKAP9+SEC23IP_P1P2+P1P2_155583+5230	424
AKAP9+SEC23IP_P1P2+P1P2_155585+5225	822
AKAP9+SEC23IP_P1P2+P1P2_155585+5229	622
AKAP9+SEC23IP_P1P2+P1P2_155585+5230	716
AKAP9+SEC23IP_P1P2+P1P2_155586+5225	1716
AKAP9+SEC23IP_P1P2+P1P2_155586+5229	1494
AKAP9+SEC23IP_P1P2+P1P2_155586+5230	1449
AKAP9+SEC24A_P1P2+P1P2_155592+5225	802
AKAP9+SEC24A_P1P2+P1P2_155592+5229	617
AKAP9+SEC24A_P1P2+P1P2_155592+5230	673
AKAP9+SEC24A_P1P2+P1P2_155593+5225	389
AKAP9+SEC24A_P1P2+P1P2_155593+5229	347
AKAP9+SEC24A_P1P2+P1P2_155593+5230	311
AKAP9+SEC24A_P1P2+P1P2_155595+5225	875
AKAP9+SEC24A_P1P2+P1P2_155595+5229	487
AKAP9+SEC24A_P1P2+P1P2_155595+5230	405
AKAP9+SEC24B_P1P2+P1P2_155604+5225	572
AKAP9+SEC24B_P1P2+P1P2_155604+5229	806
AKAP9+SEC24B_P1P2+P1P2_155604+5230	448
AKAP9+SEC24B_P1P2+P1P2_155605+5225	390
AKAP9+SEC24B_P1P2+P1P2_155605+5229	529
AKAP9+SEC24B_P1P2+P1P2_155605+5230	283
AKAP9+SEC24B_P1P2+P1P2_155608+5225	820
AKAP9+SEC24B_P1P2+P1P2_155608+5229	659
AKAP9+SEC24B_P1P2+P1P2_155608+5230	513
AKAP9+SEC24C_P1P2+P1P2_155612+5225	790
AKAP9+SEC24C_P1P2+P1P2_155612+5229	518
AKAP9+SEC24C_P1P2+P1P2_155612+5230	519
AKAP9+SEC24C_P1P2+P1P2_155613+5225	730
AKAP9+SEC24C_P1P2+P1P2_155613+5229	355
AKAP9+SEC24C_P1P2+P1P2_155613+5230	493
AKAP9+SEC24C_P1P2+P1P2_155617+5225	810
AKAP9+SEC24C_P1P2+P1P2_155617+5229	558
AKAP9+SEC24C_P1P2+P1P2_155617+5230	518
AKAP9+SF3A1_P1+P1P2_157341+5225	30
AKAP9+SF3A1_P1+P1P2_157341+5229	14
AKAP9+SF3A1_P1+P1P2_157341+5230	18
AKAP9+SF3A1_P1+P1P2_157342+5225	17
AKAP9+SF3A1_P1+P1P2_157342+5229	38
AKAP9+SF3A1_P1+P1P2_157342+5230	71
AKAP9+SF3A1_P1+P1P2_157347+5225	139
AKAP9+SF3A1_P1+P1P2_157347+5229	147
AKAP9+SF3A1_P1+P1P2_157347+5230	199
AKAP9+SF3B2_P1P2+P1P2_157412+5225	142
AKAP9+SF3B2_P1P2+P1P2_157412+5229	26
AKAP9+SF3B2_P1P2+P1P2_157412+5230	73
AKAP9+SF3B2_P1P2+P1P2_157417+5225	115
AKAP9+SF3B2_P1P2+P1P2_157417+5229	119
AKAP9+SF3B2_P1P2+P1P2_157417+5230	116
AKAP9+SF3B2_P1P2+P1P2_157420+5225	216
AKAP9+SF3B2_P1P2+P1P2_157420+5229	69
AKAP9+SF3B2_P1P2+P1P2_157420+5230	67
AKAP9+SGTA_P1P2+P1P2_158011+5225	996
AKAP9+SGTA_P1P2+P1P2_158011+5229	799
AKAP9+SGTA_P1P2+P1P2_158011+5230	864
AKAP9+SGTA_P1P2+P1P2_158013+5225	536
AKAP9+SGTA_P1P2+P1P2_158013+5229	513
AKAP9+SGTA_P1P2+P1P2_158013+5230	462
AKAP9+SGTA_P1P2+P1P2_158019+5225	701
AKAP9+SGTA_P1P2+P1P2_158019+5229	693
AKAP9+SGTA_P1P2+P1P2_158019+5230	500
AKAP9+SMC3_P1P2+P1P2_164524+5225	434
AKAP9+SMC3_P1P2+P1P2_164524+5229	465
AKAP9+SMC3_P1P2+P1P2_164524+5230	345
AKAP9+SMC3_P1P2+P1P2_164528+5225	127
AKAP9+SMC3_P1P2+P1P2_164528+5229	109
AKAP9+SMC3_P1P2+P1P2_164528+5230	33
AKAP9+SMC3_P1P2+P1P2_164530+5225	105
AKAP9+SMC3_P1P2+P1P2_164530+5229	65
AKAP9+SMC3_P1P2+P1P2_164530+5230	20
AKAP9+SNRPD3_P1P2+P1P2_165672+5225	150
AKAP9+SNRPD3_P1P2+P1P2_165672+5229	155
AKAP9+SNRPD3_P1P2+P1P2_165672+5230	67
AKAP9+SNRPD3_P1P2+P1P2_165675+5225	73
AKAP9+SNRPD3_P1P2+P1P2_165675+5229	19
AKAP9+SNRPD3_P1P2+P1P2_165675+5230	21
AKAP9+SNRPD3_P1P2+P1P2_165677+5225	108
AKAP9+SNRPD3_P1P2+P1P2_165677+5229	42
AKAP9+SNRPD3_P1P2+P1P2_165677+5230	30
AKAP9+SON_P1+P1P2_166333+5225	78
AKAP9+SON_P1+P1P2_166333+5229	35
AKAP9+SON_P1+P1P2_166333+5230	27
AKAP9+SON_P1+P1P2_166335+5225	40
AKAP9+SON_P1+P1P2_166335+5229	71
AKAP9+SON_P1+P1P2_166335+5230	10
AKAP9+SON_P1+P1P2_166338+5225	127
AKAP9+SON_P1+P1P2_166338+5229	98
AKAP9+SON_P1+P1P2_166338+5230	68
AKAP9+SPATA5L1_P1P2+P1P2_167432+5225	138
AKAP9+SPATA5L1_P1P2+P1P2_167432+5229	124
AKAP9+SPATA5L1_P1P2+P1P2_167432+5230	95
AKAP9+SPATA5L1_P1P2+P1P2_167433+5225	216
AKAP9+SPATA5L1_P1P2+P1P2_167433+5229	81
AKAP9+SPATA5L1_P1P2+P1P2_167433+5230	232
AKAP9+SPATA5L1_P1P2+P1P2_167437+5225	45
AKAP9+SPATA5L1_P1P2+P1P2_167437+5229	80
AKAP9+SPATA5L1_P1P2+P1P2_167437+5230	25
AKAP9+SPCS3_P1+P1P2_167592+5225	101
AKAP9+SPCS3_P1+P1P2_167592+5229	62
AKAP9+SPCS3_P1+P1P2_167592+5230	47
AKAP9+SPCS3_P1+P1P2_167595+5225	520
AKAP9+SPCS3_P1+P1P2_167595+5229	385
AKAP9+SPCS3_P1+P1P2_167595+5230	394
AKAP9+SPCS3_P1+P1P2_167598+5225	358
AKAP9+SPCS3_P1+P1P2_167598+5229	408
AKAP9+SPCS3_P1+P1P2_167598+5230	354
AKAP9+SPPL3_P1P2+P1P2_168364+5225	777
AKAP9+SPPL3_P1P2+P1P2_168364+5229	751
AKAP9+SPPL3_P1P2+P1P2_168364+5230	457
AKAP9+SPPL3_P1P2+P1P2_168365+5225	453
AKAP9+SPPL3_P1P2+P1P2_168365+5229	394
AKAP9+SPPL3_P1P2+P1P2_168365+5230	379
AKAP9+SPPL3_P1P2+P1P2_168368+5225	845
AKAP9+SPPL3_P1P2+P1P2_168368+5229	572
AKAP9+SPPL3_P1P2+P1P2_168368+5230	473
AKAP9+SRP54_P1P2+P1P2_169152+5225	967
AKAP9+SRP54_P1P2+P1P2_169152+5229	808
AKAP9+SRP54_P1P2+P1P2_169152+5230	601
AKAP9+SRP54_P1P2+P1P2_169154+5225	722
AKAP9+SRP54_P1P2+P1P2_169154+5229	567
AKAP9+SRP54_P1P2+P1P2_169154+5230	305
AKAP9+SRP54_P1P2+P1P2_169157+5225	363
AKAP9+SRP54_P1P2+P1P2_169157+5229	453
AKAP9+SRP54_P1P2+P1P2_169157+5230	280
AKAP9+SRPRB_P1P2+P1P2_169241+5225	118
AKAP9+SRPRB_P1P2+P1P2_169241+5229	92
AKAP9+SRPRB_P1P2+P1P2_169241+5230	57
AKAP9+SRPRB_P1P2+P1P2_169242+5225	45
AKAP9+SRPRB_P1P2+P1P2_169242+5229	82
AKAP9+SRPRB_P1P2+P1P2_169242+5230	83
AKAP9+SRPRB_P1P2+P1P2_169243+5225	267
AKAP9+SRPRB_P1P2+P1P2_169243+5229	222
AKAP9+SRPRB_P1P2+P1P2_169243+5230	135
AKAP9+ST3GAL4_P1P2+P1P2_169993+5225	795
AKAP9+ST3GAL4_P1P2+P1P2_169993+5229	1133
AKAP9+ST3GAL4_P1P2+P1P2_169993+5230	617
AKAP9+ST3GAL4_P1P2+P1P2_169997+5225	1408
AKAP9+ST3GAL4_P1P2+P1P2_169997+5229	1554
AKAP9+ST3GAL4_P1P2+P1P2_169997+5230	835
AKAP9+ST3GAL4_P1P2+P1P2_169998+5225	1117
AKAP9+ST3GAL4_P1P2+P1P2_169998+5229	714
AKAP9+ST3GAL4_P1P2+P1P2_169998+5230	557
[truncated: 46,401 more rows]

## Sheet: Plasmid
0Safe+0Safe_safe+safe_204603.4554+204603.4554	97
0Safe+0Safe_safe+safe_204603.4554+204750.4701	247
0Safe+0Safe_safe+safe_204603.4554+204798.4749	264
0Safe+0Safe_safe+safe_204603.4554+204895.4846	196
0Safe+0Safe_safe+safe_204603.4554+205190.5141	218
0Safe+0Safe_safe+safe_204603.4554+205244.5195	188
0Safe+0Safe_safe+safe_204603.4554+205896.5847	187
0Safe+0Safe_safe+safe_204603.4554+205926.5877	286
0Safe+0Safe_safe+safe_204603.4554+206014.5965	210
0Safe+0Safe_safe+safe_204603.4554+206141.1592	302
0Safe+0Safe_safe+safe_204603.4554+206175.1626	255
0Safe+0Safe_safe+safe_204603.4554+206180.1631	250
0Safe+0Safe_safe+safe_204603.4554+206276.1727	200
0Safe+0Safe_safe+safe_204603.4554+207086.1286	248
0Safe+0Safe_safe+safe_204603.4554+207133.1333	238
0Safe+0Safe_safe+safe_204603.4554+207268.1468	212
0Safe+0Safe_safe+safe_204603.4554+207272.1472	246
0Safe+0Safe_safe+safe_204603.4554+207295.1495	257
0Safe+0Safe_safe+safe_204603.4554+207412.862	247
0Safe+0Safe_safe+safe_204603.4554+207644.2345	330
0Safe+0Safe_safe+safe_204603.4554+207736.2437	212
0Safe+0Safe_safe+safe_204603.4554+207762.2463	192
0Safe+0Safe_safe+safe_204603.4554+207933.2634	290
0Safe+0Safe_safe+safe_204603.4554+208027.2728	195
0Safe+0Safe_safe+safe_204603.4554+208233.2934	221
0Safe+0Safe_safe+safe_204603.4554+208249.2950	187
0Safe+0Safe_safe+safe_204603.4554+208251.2952	272
0Safe+0Safe_safe+safe_204603.4554+208266.2967	254
0Safe+0Safe_safe+safe_204603.4554+208280.2981	281
0Safe+0Safe_safe+safe_204603.4554+208288.2989	244
0Safe+0Safe_safe+safe_204603.4554+208334.13	266
0Safe+0Safe_safe+safe_204603.4554+208691.451	179
0Safe+0Safe_safe+safe_204603.4554+208974.706	262
0Safe+0Safe_safe+safe_204603.4554+209014.742	238
0Safe+0Safe_safe+safe_204603.4554+209157.3858	277
0Safe+0Safe_safe+safe_204603.4554+209400.4101	335
0Safe+0Safe_safe+safe_204603.4554+209597.4298	185
0Safe+0Safe_safe+safe_204603.4554+209963.3164	275
0Safe+0Safe_safe+safe_204603.4554+209973.3174	325
0Safe+0Safe_safe+safe_204603.4554+209990.3191	242
0Safe+0Safe_safe+safe_204603.4554+210140.3341	359
0Safe+0Safe_safe+safe_204603.4554+210313.3514	253
0Safe+0Safe_safe+safe_204603.4554+210540.3741	279
0Safe+0Safe_safe+safe_204603.4554+210725.6176	292
0Safe+0Safe_safe+safe_204603.4554+210743.6194	268
0Safe+0Safe_safe+safe_204603.4554+210809.6260	234
0Safe+0Safe_safe+safe_204603.4554+210925.6376	164
0Safe+0Safe_safe+safe_204603.4554+210935.6386	193
0Safe+0Safe_safe+safe_204603.4554+210946.6397	296
0Safe+0Safe_safe+safe_204603.4554+211135.6586	178
0Safe+0Safe_safe+safe_204750.4701+204750.4701	103
0Safe+0Safe_safe+safe_204750.4701+204798.4749	275
0Safe+0Safe_safe+safe_204750.4701+204895.4846	184
0Safe+0Safe_safe+safe_204750.4701+205190.5141	268
0Safe+0Safe_safe+safe_204750.4701+205244.5195	228
0Safe+0Safe_safe+safe_204750.4701+205896.5847	264
0Safe+0Safe_safe+safe_204750.4701+205926.5877	264
0Safe+0Safe_safe+safe_204750.4701+206014.5965	223
0Safe+0Safe_safe+safe_204750.4701+206141.1592	348
0Safe+0Safe_safe+safe_204750.4701+206175.1626	273
0Safe+0Safe_safe+safe_204750.4701+206180.1631	261
0Safe+0Safe_safe+safe_204750.4701+206276.1727	235
0Safe+0Safe_safe+safe_204750.4701+207086.1286	281
0Safe+0Safe_safe+safe_204750.4701+207133.1333	301
0Safe+0Safe_safe+safe_204750.4701+207268.1468	202
0Safe+0Safe_safe+safe_204750.4701+207272.1472	285
0Safe+0Safe_safe+safe_204750.4701+207295.1495	299
0Safe+0Safe_safe+safe_204750.4701+207412.862	259
0Safe+0Safe_safe+safe_204750.4701+207644.2345	328
0Safe+0Safe_safe+safe_204750.4701+207736.2437	201
0Safe+0Safe_safe+safe_204750.4701+207762.2463	273
0Safe+0Safe_safe+safe_204750.4701+207933.2634	317
0Safe+0Safe_safe+safe_204750.4701+208027.2728	227
0Safe+0Safe_safe+safe_204750.4701+208233.2934	270
0Safe+0Safe_safe+safe_204750.4701+208249.2950	217
0Safe+0Safe_safe+safe_204750.4701+208251.2952	346
0Safe+0Safe_safe+safe_204750.4701+208266.2967	293
0Safe+0Safe_safe+safe_204750.4701+208280.2981	320
0Safe+0Safe_safe+safe_204750.4701+208288.2989	313
0Safe+0Safe_safe+safe_204750.4701+208334.13	305
0Safe+0Safe_safe+safe_204750.4701+208691.451	244
0Safe+0Safe_safe+safe_204750.4701+208974.706	293
0Safe+0Safe_safe+safe_204750.4701+209014.742	283
0Safe+0Safe_safe+safe_204750.4701+209157.3858	295
0Safe+0Safe_safe+safe_204750.4701+209400.4101	312
0Safe+0Safe_safe+safe_204750.4701+209597.4298	269
0Safe+0Safe_safe+safe_204750.4701+209963.3164	282
0Safe+0Safe_safe+safe_204750.4701+209973.3174	363
0Safe+0Safe_safe+safe_204750.4701+209990.3191	293
0Safe+0Safe_safe+safe_204750.4701+210140.3341	393
0Safe+0Safe_safe+safe_204750.4701+210313.3514	291
0Safe+0Safe_safe+safe_204750.4701+210540.3741	341
0Safe+0Safe_safe+safe_204750.4701+210725.6176	340
0Safe+0Safe_safe+safe_204750.4701+210743.6194	288
0Safe+0Safe_safe+safe_204750.4701+210809.6260	261
0Safe+0Safe_safe+safe_204750.4701+210925.6376	229
0Safe+0Safe_safe+safe_204750.4701+210935.6386	187
0Safe+0Safe_safe+safe_204750.4701+210946.6397	297
0Safe+0Safe_safe+safe_204750.4701+211135.6586	193
0Safe+0Safe_safe+safe_204798.4749+204798.4749	91
0Safe+0Safe_safe+safe_204798.4749+204895.4846	207
0Safe+0Safe_safe+safe_204798.4749+205190.5141	285
0Safe+0Safe_safe+safe_204798.4749+205244.5195	201
0Safe+0Safe_safe+safe_204798.4749+205896.5847	197
0Safe+0Safe_safe+safe_204798.4749+205926.5877	231
0Safe+0Safe_safe+safe_204798.4749+206014.5965	258
0Safe+0Safe_safe+safe_204798.4749+206141.1592	351
0Safe+0Safe_safe+safe_204798.4749+206175.1626	267
0Safe+0Safe_safe+safe_204798.4749+206180.1631	233
0Safe+0Safe_safe+safe_204798.4749+206276.1727	223
0Safe+0Safe_safe+safe_204798.4749+207086.1286	300
0Safe+0Safe_safe+safe_204798.4749+207133.1333	290
0Safe+0Safe_safe+safe_204798.4749+207268.1468	193
0Safe+0Safe_safe+safe_204798.4749+207272.1472	259
0Safe+0Safe_safe+safe_204798.4749+207295.1495	247
0Safe+0Safe_safe+safe_204798.4749+207412.862	252
0Safe+0Safe_safe+safe_204798.4749+207644.2345	340
0Safe+0Safe_safe+safe_204798.4749+207736.2437	229
0Safe+0Safe_safe+safe_204798.4749+207762.2463	170
0Safe+0Safe_safe+safe_204798.4749+207933.2634	358
0Safe+0Safe_safe+safe_204798.4749+208027.2728	199
0Safe+0Safe_safe+safe_204798.4749+208233.2934	250
0Safe+0Safe_safe+safe_204798.4749+208249.2950	238
0Safe+0Safe_safe+safe_204798.4749+208251.2952	290
0Safe+0Safe_safe+safe_204798.4749+208266.2967	304
0Safe+0Safe_safe+safe_204798.4749+208280.2981	274
0Safe+0Safe_safe+safe_204798.4749+208288.2989	292
0Safe+0Safe_safe+safe_204798.4749+208334.13	299
0Safe+0Safe_safe+safe_204798.4749+208691.451	226
0Safe+0Safe_safe+safe_204798.4749+208974.706	297
0Safe+0Safe_safe+safe_204798.4749+209014.742	227
0Safe+0Safe_safe+safe_204798.4749+209157.3858	282
0Safe+0Safe_safe+safe_204798.4749+209400.4101	314
0Safe+0Safe_safe+safe_204798.4749+209597.4298	223
0Safe+0Safe_safe+safe_204798.4749+209963.3164	238
0Safe+0Safe_safe+safe_204798.4749+209973.3174	348
0Safe+0Safe_safe+safe_204798.4749+209990.3191	218
0Safe+0Safe_safe+safe_204798.4749+210140.3341	352
0Safe+0Safe_safe+safe_204798.4749+210313.3514	209
0Safe+0Safe_safe+safe_204798.4749+210540.3741	305
0Safe+0Safe_safe+safe_204798.4749+210725.6176	329
0Safe+0Safe_safe+safe_204798.4749+210743.6194	296
0Safe+0Safe_safe+safe_204798.4749+210809.6260	209
0Safe+0Safe_safe+safe_204798.4749+210925.6376	203
0Safe+0Safe_safe+safe_204798.4749+210935.6386	213
0Safe+0Safe_safe+safe_204798.4749+210946.6397	306
0Safe+0Safe_safe+safe_204798.4749+211135.6586	224
0Safe+0Safe_safe+safe_204895.4846+204895.4846	80
0Safe+0Safe_safe+safe_204895.4846+205190.5141	200
0Safe+0Safe_safe+safe_204895.4846+205244.5195	152
0Safe+0Safe_safe+safe_204895.4846+205896.5847	192
0Safe+0Safe_safe+safe_204895.4846+205926.5877	209
0Safe+0Safe_safe+safe_204895.4846+206014.5965	185
0Safe+0Safe_safe+safe_204895.4846+206141.1592	228
0Safe+0Safe_safe+safe_204895.4846+206175.1626	228
0Safe+0Safe_safe+safe_204895.4846+206180.1631	181
0Safe+0Safe_safe+safe_204895.4846+206276.1727	173
0Safe+0Safe_safe+safe_204895.4846+207086.1286	214
0Safe+0Safe_safe+safe_204895.4846+207133.1333	188
0Safe+0Safe_safe+safe_204895.4846+207268.1468	151
0Safe+0Safe_safe+safe_204895.4846+207272.1472	183
0Safe+0Safe_safe+safe_204895.4846+207295.1495	209
0Safe+0Safe_safe+safe_204895.4846+207412.862	165
0Safe+0Safe_safe+safe_204895.4846+207644.2345	237
0Safe+0Safe_safe+safe_204895.4846+207736.2437	135
0Safe+0Safe_safe+safe_204895.4846+207762.2463	189
0Safe+0Safe_safe+safe_204895.4846+207933.2634	249
0Safe+0Safe_safe+safe_204895.4846+208027.2728	164
0Safe+0Safe_safe+safe_204895.4846+208233.2934	199
0Safe+0Safe_safe+safe_204895.4846+208249.2950	147
0Safe+0Safe_safe+safe_204895.4846+208251.2952	210
0Safe+0Safe_safe+safe_204895.4846+208266.2967	200
0Safe+0Safe_safe+safe_204895.4846+208280.2981	223
0Safe+0Safe_safe+safe_204895.4846+208288.2989	224
0Safe+0Safe_safe+safe_204895.4846+208334.13	199
0Safe+0Safe_safe+safe_204895.4846+208691.451	163
0Safe+0Safe_safe+safe_204895.4846+208974.706	256
0Safe+0Safe_safe+safe_204895.4846+209014.742	176
0Safe+0Safe_safe+safe_204895.4846+209157.3858	205
0Safe+0Safe_safe+safe_204895.4846+209400.4101	192
0Safe+0Safe_safe+safe_204895.4846+209597.4298	190
0Safe+0Safe_safe+safe_204895.4846+209963.3164	182
0Safe+0Safe_safe+safe_204895.4846+209973.3174	267
0Safe+0Safe_safe+safe_204895.4846+209990.3191	163
0Safe+0Safe_safe+safe_204895.4846+210140.3341	244
0Safe+0Safe_safe+safe_204895.4846+210313.3514	207
0Safe+0Safe_safe+safe_204895.4846+210540.3741	202
0Safe+0Safe_safe+safe_204895.4846+210725.6176	204
0Safe+0Safe_safe+safe_204895.4846+210743.6194	174
0Safe+0Safe_safe+safe_204895.4846+210809.6260	190
0Safe+0Safe_safe+safe_204895.4846+210925.6376	149
0Safe+0Safe_safe+safe_204895.4846+210935.6386	139
0Safe+0Safe_safe+safe_204895.4846+210946.6397	215
0Safe+0Safe_safe+safe_204895.4846+211135.6586	165
0Safe+0Safe_safe+safe_205190.5141+205190.5141	87
0Safe+0Safe_safe+safe_205190.5141+205244.5195	197
0Safe+0Safe_safe+safe_205190.5141+205896.5847	250
0Safe+0Safe_safe+safe_205190.5141+205926.5877	208
0Safe+0Safe_safe+safe_205190.5141+206014.5965	199
0Safe+0Safe_safe+safe_205190.5141+206141.1592	271
0Safe+0Safe_safe+safe_205190.5141+206175.1626	238
0Safe+0Safe_safe+safe_205190.5141+206180.1631	241
0Safe+0Safe_safe+safe_205190.5141+206276.1727	207
0Safe+0Safe_safe+safe_205190.5141+207086.1286	244
0Safe+0Safe_safe+safe_205190.5141+207133.1333	280
0Safe+0Safe_safe+safe_205190.5141+207268.1468	176
0Safe+0Safe_safe+safe_205190.5141+207272.1472	224
0Safe+0Safe_safe+safe_205190.5141+207295.1495	214
0Safe+0Safe_safe+safe_205190.5141+207412.862	197
0Safe+0Safe_safe+safe_205190.5141+207644.2345	323
0Safe+0Safe_safe+safe_205190.5141+207736.2437	231
0Safe+0Safe_safe+safe_205190.5141+207762.2463	221
0Safe+0Safe_safe+safe_205190.5141+207933.2634	270
0Safe+0Safe_safe+safe_205190.5141+208027.2728	206
0Safe+0Safe_safe+safe_205190.5141+208233.2934	218
0Safe+0Safe_safe+safe_205190.5141+208249.2950	208
0Safe+0Safe_safe+safe_205190.5141+208251.2952	273
0Safe+0Safe_safe+safe_205190.5141+208266.2967	239
0Safe+0Safe_safe+safe_205190.5141+208280.2981	285
0Safe+0Safe_safe+safe_205190.5141+208288.2989	269
0Safe+0Safe_safe+safe_205190.5141+208334.13	255
0Safe+0Safe_safe+safe_205190.5141+208691.451	216
0Safe+0Safe_safe+safe_205190.5141+208974.706	268
0Safe+0Safe_safe+safe_205190.5141+209014.742	250
0Safe+0Safe_safe+safe_205190.5141+209157.3858	248
0Safe+0Safe_safe+safe_205190.5141+209400.4101	272
0Safe+0Safe_safe+safe_205190.5141+209597.4298	209
0Safe+0Safe_safe+safe_205190.5141+209963.3164	215
0Safe+0Safe_safe+safe_205190.5141+209973.3174	291
0Safe+0Safe_safe+safe_205190.5141+209990.3191	194
0Safe+0Safe_safe+safe_205190.5141+210140.3341	324
0Safe+0Safe_safe+safe_205190.5141+210313.3514	220
0Safe+0Safe_safe+safe_205190.5141+210540.3741	296
0Safe+0Safe_safe+safe_205190.5141+210725.6176	225
0Safe+0Safe_safe+safe_205190.5141+210743.6194	307
0Safe+0Safe_safe+safe_205190.5141+210809.6260	224
0Safe+0Safe_safe+safe_205190.5141+210925.6376	198
0Safe+0Safe_safe+safe_205190.5141+210935.6386	217
0Safe+0Safe_safe+safe_205190.5141+210946.6397	233
0Safe+0Safe_safe+safe_205190.5141+211135.6586	201
0Safe+0Safe_safe+safe_205244.5195+205244.5195	81
0Safe+0Safe_safe+safe_205244.5195+205896.5847	164
0Safe+0Safe_safe+safe_205244.5195+205926.5877	204
0Safe+0Safe_safe+safe_205244.5195+206014.5965	192
0Safe+0Safe_safe+safe_205244.5195+206141.1592	273
0Safe+0Safe_safe+safe_205244.5195+206175.1626	192
0Safe+0Safe_safe+safe_205244.5195+206180.1631	201
0Safe+0Safe_safe+safe_205244.5195+206276.1727	203
0Safe+0Safe_safe+safe_205244.5195+207086.1286	186
0Safe+0Safe_safe+safe_205244.5195+207133.1333	233
0Safe+0Safe_safe+safe_205244.5195+207268.1468	160
0Safe+0Safe_safe+safe_205244.5195+207272.1472	200
0Safe+0Safe_safe+safe_205244.5195+207295.1495	216
0Safe+0Safe_safe+safe_205244.5195+207412.862	195
0Safe+0Safe_safe+safe_205244.5195+207644.2345	258
0Safe+0Safe_safe+safe_205244.5195+207736.2437	195
0Safe+0Safe_safe+safe_205244.5195+207762.2463	181
0Safe+0Safe_safe+safe_205244.5195+207933.2634	243
0Safe+0Safe_safe+safe_205244.5195+208027.2728	177
0Safe+0Safe_safe+safe_205244.5195+208233.2934	176
0Safe+0Safe_safe+safe_205244.5195+208249.2950	187
0Safe+0Safe_safe+safe_205244.5195+208251.2952	232
0Safe+0Safe_safe+safe_205244.5195+208266.2967	208
0Safe+0Safe_safe+safe_205244.5195+208280.2981	217
0Safe+0Safe_safe+safe_205244.5195+208288.2989	263
0Safe+0Safe_safe+safe_205244.5195+208334.13	200
0Safe+0Safe_safe+safe_205244.5195+208691.451	166
0Safe+0Safe_safe+safe_205244.5195+208974.706	275
0Safe+0Safe_safe+safe_205244.5195+209014.742	214
0Safe+0Safe_safe+safe_205244.5195+209157.3858	234
0Safe+0Safe_safe+safe_205244.5195+209400.4101	248
0Safe+0Safe_safe+safe_205244.5195+209597.4298	189
0Safe+0Safe_safe+safe_205244.5195+209963.3164	261
0Safe+0Safe_safe+safe_205244.5195+209973.3174	230
0Safe+0Safe_safe+safe_205244.5195+209990.3191	157
0Safe+0Safe_safe+safe_205244.5195+210140.3341	270
0Safe+0Safe_safe+safe_205244.5195+210313.3514	208
0Safe+0Safe_safe+safe_205244.5195+210540.3741	268
0Safe+0Safe_safe+safe_205244.5195+210725.6176	217
0Safe+0Safe_safe+safe_205244.5195+210743.6194	251
0Safe+0Safe_safe+safe_205244.5195+210809.6260	216
0Safe+0Safe_safe+safe_205244.5195+210925.6376	179
0Safe+0Safe_safe+safe_205244.5195+210935.6386	146
0Safe+0Safe_safe+safe_205244.5195+210946.6397	260
0Safe+0Safe_safe+safe_205244.5195+211135.6586	192
0Safe+0Safe_safe+safe_205896.5847+205896.5847	65
0Safe+0Safe_safe+safe_205896.5847+205926.5877	270
0Safe+0Safe_safe+safe_205896.5847+206014.5965	198
0Safe+0Safe_safe+safe_205896.5847+206141.1592	288
0Safe+0Safe_safe+safe_205896.5847+206175.1626	221
0Safe+0Safe_safe+safe_205896.5847+206180.1631	231
0Safe+0Safe_safe+safe_205896.5847+206276.1727	209
0Safe+0Safe_safe+safe_205896.5847+207086.1286	258
0Safe+0Safe_safe+safe_205896.5847+207133.1333	202
0Safe+0Safe_safe+safe_205896.5847+207268.1468	161
0Safe+0Safe_safe+safe_205896.5847+207272.1472	206
0Safe+0Safe_safe+safe_205896.5847+207295.1495	207
0Safe+0Safe_safe+safe_205896.5847+207412.862	200
0Safe+0Safe_safe+safe_205896.5847+207644.2345	327
0Safe+0Safe_safe+safe_205896.5847+207736.2437	178
0Safe+0Safe_safe+safe_205896.5847+207762.2463	212
0Safe+0Safe_safe+safe_205896.5847+207933.2634	254
0Safe+0Safe_safe+safe_205896.5847+208027.2728	180
0Safe+0Safe_safe+safe_205896.5847+208233.2934	193
0Safe+0Safe_safe+safe_205896.5847+208249.2950	210
0Safe+0Safe_safe+safe_205896.5847+208251.2952	262
0Safe+0Safe_safe+safe_205896.5847+208266.2967	258
0Safe+0Safe_safe+safe_205896.5847+208280.2981	231
0Safe+0Safe_safe+safe_205896.5847+208288.2989	305
0Safe+0Safe_safe+safe_205896.5847+208334.13	205
0Safe+0Safe_safe+safe_205896.5847+208691.451	226
0Safe+0Safe_safe+safe_205896.5847+208974.706	283
0Safe+0Safe_safe+safe_205896.5847+209014.742	260
0Safe+0Safe_safe+safe_205896.5847+209157.3858	273
0Safe+0Safe_safe+safe_205896.5847+209400.4101	277
0Safe+0Safe_safe+safe_205896.5847+209597.4298	213
0Safe+0Safe_safe+safe_205896.5847+209963.3164	254
0Safe+0Safe_safe+safe_205896.5847+209973.3174	276
0Safe+0Safe_safe+safe_205896.5847+209990.3191	195
0Safe+0Safe_safe+safe_205896.5847+210140.3341	296
0Safe+0Safe_safe+safe_205896.5847+210313.3514	205
0Safe+0Safe_safe+safe_205896.5847+210540.3741	300
0Safe+0Safe_safe+safe_205896.5847+210725.6176	221
0Safe+0Safe_safe+safe_205896.5847+210743.6194	247
0Safe+0Safe_safe+safe_205896.5847+210809.6260	202
0Safe+0Safe_safe+safe_205896.5847+210925.6376	182
0Safe+0Safe_safe+safe_205896.5847+210935.6386	190
0Safe+0Safe_safe+safe_205896.5847+210946.6397	281
0Safe+0Safe_safe+safe_205896.5847+211135.6586	159
0Safe+0Safe_safe+safe_205926.5877+205926.5877	96
0Safe+0Safe_safe+safe_205926.5877+206014.5965	222
0Safe+0Safe_safe+safe_205926.5877+206141.1592	372
0Safe+0Safe_safe+safe_205926.5877+206175.1626	268
0Safe+0Safe_safe+safe_205926.5877+206180.1631	254
0Safe+0Safe_safe+safe_205926.5877+206276.1727	219
0Safe+0Safe_safe+safe_205926.5877+207086.1286	313
0Safe+0Safe_safe+safe_205926.5877+207133.1333	258
0Safe+0Safe_safe+safe_205926.5877+207268.1468	210
0Safe+0Safe_safe+safe_205926.5877+207272.1472	273
0Safe+0Safe_safe+safe_205926.5877+207295.1495	286
0Safe+0Safe_safe+safe_205926.5877+207412.862	255
0Safe+0Safe_safe+safe_205926.5877+207644.2345	355
0Safe+0Safe_safe+safe_205926.5877+207736.2437	235
0Safe+0Safe_safe+safe_205926.5877+207762.2463	268
0Safe+0Safe_safe+safe_205926.5877+207933.2634	307
0Safe+0Safe_safe+safe_205926.5877+208027.2728	178
0Safe+0Safe_safe+safe_205926.5877+208233.2934	231
0Safe+0Safe_safe+safe_205926.5877+208249.2950	244
0Safe+0Safe_safe+safe_205926.5877+208251.2952	282
0Safe+0Safe_safe+safe_205926.5877+208266.2967	282
0Safe+0Safe_safe+safe_205926.5877+208280.2981	279
0Safe+0Safe_safe+safe_205926.5877+208288.2989	380
0Safe+0Safe_safe+safe_205926.5877+208334.13	246
0Safe+0Safe_safe+safe_205926.5877+208691.451	226
0Safe+0Safe_safe+safe_205926.5877+208974.706	331
0Safe+0Safe_safe+safe_205926.5877+209014.742	275
0Safe+0Safe_safe+safe_205926.5877+209157.3858	282
0Safe+0Safe_safe+safe_205926.5877+209400.4101	333
0Safe+0Safe_safe+safe_205926.5877+209597.4298	295
0Safe+0Safe_safe+safe_205926.5877+209963.3164	223
0Safe+0Safe_safe+safe_205926.5877+209973.3174	325
0Safe+0Safe_safe+safe_205926.5877+209990.3191	207
0Safe+0Safe_safe+safe_205926.5877+210140.3341	407
0Safe+0Safe_safe+safe_205926.5877+210313.3514	273
0Safe+0Safe_safe+safe_205926.5877+210540.3741	319
0Safe+0Safe_safe+safe_205926.5877+210725.6176	290
0Safe+0Safe_safe+safe_205926.5877+210743.6194	297
0Safe+0Safe_safe+safe_205926.5877+210809.6260	240
0Safe+0Safe_safe+safe_205926.5877+210925.6376	180
0Safe+0Safe_safe+safe_205926.5877+210935.6386	228
0Safe+0Safe_safe+safe_205926.5877+210946.6397	301
0Safe+0Safe_safe+safe_205926.5877+211135.6586	237
0Safe+0Safe_safe+safe_206014.5965+206014.5965	125
0Safe+0Safe_safe+safe_206014.5965+206141.1592	288
0Safe+0Safe_safe+safe_206014.5965+206175.1626	235
0Safe+0Safe_safe+safe_206014.5965+206180.1631	171
0Safe+0Safe_safe+safe_206014.5965+206276.1727	197
0Safe+0Safe_safe+safe_206014.5965+207086.1286	234
0Safe+0Safe_safe+safe_206014.5965+207133.1333	269
0Safe+0Safe_safe+safe_206014.5965+207268.1468	184
0Safe+0Safe_safe+safe_206014.5965+207272.1472	231
0Safe+0Safe_safe+safe_206014.5965+207295.1495	244
0Safe+0Safe_safe+safe_206014.5965+207412.862	225
0Safe+0Safe_safe+safe_206014.5965+207644.2345	300
0Safe+0Safe_safe+safe_206014.5965+207736.2437	204
0Safe+0Safe_safe+safe_206014.5965+207762.2463	246
0Safe+0Safe_safe+safe_206014.5965+207933.2634	296
0Safe+0Safe_safe+safe_206014.5965+208027.2728	238
0Safe+0Safe_safe+safe_206014.5965+208233.2934	222
0Safe+0Safe_safe+safe_206014.5965+208249.2950	280
0Safe+0Safe_safe+safe_206014.5965+208251.2952	259
0Safe+0Safe_safe+safe_206014.5965+208266.2967	277
0Safe+0Safe_safe+safe_206014.5965+208280.2981	235
0Safe+0Safe_safe+safe_206014.5965+208288.2989	284
0Safe+0Safe_safe+safe_206014.5965+208334.13	234
0Safe+0Safe_safe+safe_206014.5965+208691.451	245
0Safe+0Safe_safe+safe_206014.5965+208974.706	278
0Safe+0Safe_safe+safe_206014.5965+209014.742	249
0Safe+0Safe_safe+safe_206014.5965+209157.3858	252
0Safe+0Safe_safe+safe_206014.5965+209400.4101	319
0Safe+0Safe_safe+safe_206014.5965+209597.4298	230
0Safe+0Safe_safe+safe_206014.5965+209963.3164	266
0Safe+0Safe_safe+safe_206014.5965+209973.3174	310
0Safe+0Safe_safe+safe_206014.5965+209990.3191	239
0Safe+0Safe_safe+safe_206014.5965+210140.3341	357
0Safe+0Safe_safe+safe_206014.5965+210313.3514	189
0Safe+0Safe_safe+safe_206014.5965+210540.3741	305
0Safe+0Safe_safe+safe_206014.5965+210725.6176	234
0Safe+0Safe_safe+safe_206014.5965+210743.6194	258
0Safe+0Safe_safe+safe_206014.5965+210809.6260	212
0Safe+0Safe_safe+safe_206014.5965+210925.6376	178
0Safe+0Safe_safe+safe_206014.5965+210935.6386	186
0Safe+0Safe_safe+safe_206014.5965+210946.6397	272
0Safe+0Safe_safe+safe_206014.5965+211135.6586	202
0Safe+0Safe_safe+safe_206141.1592+206141.1592	165
0Safe+0Safe_safe+safe_206141.1592+206175.1626	334
0Safe+0Safe_safe+safe_206141.1592+206180.1631	271
0Safe+0Safe_safe+safe_206141.1592+206276.1727	244
0Safe+0Safe_safe+safe_206141.1592+207086.1286	369
0Safe+0Safe_safe+safe_206141.1592+207133.1333	335
0Safe+0Safe_safe+safe_206141.1592+207268.1468	213
0Safe+0Safe_safe+safe_206141.1592+207272.1472	374
0Safe+0Safe_safe+safe_206141.1592+207295.1495	328
0Safe+0Safe_safe+safe_206141.1592+207412.862	301
0Safe+0Safe_safe+safe_206141.1592+207644.2345	449
0Safe+0Safe_safe+safe_206141.1592+207736.2437	319
0Safe+0Safe_safe+safe_206141.1592+207762.2463	345
0Safe+0Safe_safe+safe_206141.1592+207933.2634	407
0Safe+0Safe_safe+safe_206141.1592+208027.2728	289
0Safe+0Safe_safe+safe_206141.1592+208233.2934	263
0Safe+0Safe_safe+safe_206141.1592+208249.2950	323
0Safe+0Safe_safe+safe_206141.1592+208251.2952	349
0Safe+0Safe_safe+safe_206141.1592+208266.2967	336
0Safe+0Safe_safe+safe_206141.1592+208280.2981	362
0Safe+0Safe_safe+safe_206141.1592+208288.2989	401
0Safe+0Safe_safe+safe_206141.1592+208334.13	350
0Safe+0Safe_safe+safe_206141.1592+208691.451	306
0Safe+0Safe_safe+safe_206141.1592+208974.706	354
0Safe+0Safe_safe+safe_206141.1592+209014.742	340
0Safe+0Safe_safe+safe_206141.1592+209157.3858	309
0Safe+0Safe_safe+safe_206141.1592+209400.4101	336
0Safe+0Safe_safe+safe_206141.1592+209597.4298	332
0Safe+0Safe_safe+safe_206141.1592+209963.3164	305
0Safe+0Safe_safe+safe_206141.1592+209973.3174	424
0Safe+0Safe_safe+safe_206141.1592+209990.3191	298
0Safe+0Safe_safe+safe_206141.1592+210140.3341	427
0Safe+0Safe_safe+safe_206141.1592+210313.3514	282
0Safe+0Safe_safe+safe_206141.1592+210540.3741	358
0Safe+0Safe_safe+safe_206141.1592+210725.6176	352
0Safe+0Safe_safe+safe_206141.1592+210743.6194	343
0Safe+0Safe_safe+safe_206141.1592+210809.6260	315
0Safe+0Safe_safe+safe_206141.1592+210925.6376	209
0Safe+0Safe_safe+safe_206141.1592+210935.6386	303
0Safe+0Safe_safe+safe_206141.1592+210946.6397	398
0Safe+0Safe_safe+safe_206141.1592+211135.6586	266
0Safe+0Safe_safe+safe_206175.1626+206175.1626	129
0Safe+0Safe_safe+safe_206175.1626+206180.1631	203
0Safe+0Safe_safe+safe_206175.1626+206276.1727	197
0Safe+0Safe_safe+safe_206175.1626+207086.1286	298
0Safe+0Safe_safe+safe_206175.1626+207133.1333	250
0Safe+0Safe_safe+safe_206175.1626+207268.1468	186
0Safe+0Safe_safe+safe_206175.1626+207272.1472	290
0Safe+0Safe_safe+safe_206175.1626+207295.1495	244
0Safe+0Safe_safe+safe_206175.1626+207412.862	237
0Safe+0Safe_safe+safe_206175.1626+207644.2345	303
0Safe+0Safe_safe+safe_206175.1626+207736.2437	254
0Safe+0Safe_safe+safe_206175.1626+207762.2463	231
0Safe+0Safe_safe+safe_206175.1626+207933.2634	279
0Safe+0Safe_safe+safe_206175.1626+208027.2728	179
0Safe+0Safe_safe+safe_206175.1626+208233.2934	255
0Safe+0Safe_safe+safe_206175.1626+208249.2950	274
0Safe+0Safe_safe+safe_206175.1626+208251.2952	322
0Safe+0Safe_safe+safe_206175.1626+208266.2967	282
0Safe+0Safe_safe+safe_206175.1626+208280.2981	272
0Safe+0Safe_safe+safe_206175.1626+208288.2989	226
0Safe+0Safe_safe+safe_206175.1626+208334.13	273
0Safe+0Safe_safe+safe_206175.1626+208691.451	249
0Safe+0Safe_safe+safe_206175.1626+208974.706	299
0Safe+0Safe_safe+safe_206175.1626+209014.742	226
0Safe+0Safe_safe+safe_206175.1626+209157.3858	251
0Safe+0Safe_safe+safe_206175.1626+209400.4101	304
0Safe+0Safe_safe+safe_206175.1626+209597.4298	229
0Safe+0Safe_safe+safe_206175.1626+209963.3164	283
0Safe+0Safe_safe+safe_206175.1626+209973.3174	353
0Safe+0Safe_safe+safe_206175.1626+209990.3191	247
0Safe+0Safe_safe+safe_206175.1626+210140.3341	452
0Safe+0Safe_safe+safe_206175.1626+210313.3514	232
0Safe+0Safe_safe+safe_206175.1626+210540.3741	284
0Safe+0Safe_safe+safe_206175.1626+210725.6176	277
0Safe+0Safe_safe+safe_206175.1626+210743.6194	289
0Safe+0Safe_safe+safe_206175.1626+210809.6260	190
0Safe+0Safe_safe+safe_206175.1626+210925.6376	158
0Safe+0Safe_safe+safe_206175.1626+210935.6386	182
0Safe+0Safe_safe+safe_206175.1626+210946.6397	280
0Safe+0Safe_safe+safe_206175.1626+211135.6586	229
0Safe+0Safe_safe+safe_206180.1631+206180.1631	95
0Safe+0Safe_safe+safe_206180.1631+206276.1727	183
0Safe+0Safe_safe+safe_206180.1631+207086.1286	239
0Safe+0Safe_safe+safe_206180.1631+207133.1333	266
0Safe+0Safe_safe+safe_206180.1631+207268.1468	163
0Safe+0Safe_safe+safe_206180.1631+207272.1472	259
0Safe+0Safe_safe+safe_206180.1631+207295.1495	214
0Safe+0Safe_safe+safe_206180.1631+207412.862	226
0Safe+0Safe_safe+safe_206180.1631+207644.2345	287
0Safe+0Safe_safe+safe_206180.1631+207736.2437	175
0Safe+0Safe_safe+safe_206180.1631+207762.2463	207
0Safe+0Safe_safe+safe_206180.1631+207933.2634	240
0Safe+0Safe_safe+safe_206180.1631+208027.2728	213
0Safe+0Safe_safe+safe_206180.1631+208233.2934	224
0Safe+0Safe_safe+safe_206180.1631+208249.2950	213
0Safe+0Safe_safe+safe_206180.1631+208251.2952	273
0Safe+0Safe_safe+safe_206180.1631+208266.2967	268
0Safe+0Safe_safe+safe_206180.1631+208280.2981	230
0Safe+0Safe_safe+safe_206180.1631+208288.2989	241
0Safe+0Safe_safe+safe_206180.1631+208334.13	248
0Safe+0Safe_safe+safe_206180.1631+208691.451	189
0Safe+0Safe_safe+safe_206180.1631+208974.706	242
0Safe+0Safe_safe+safe_206180.1631+209014.742	257
0Safe+0Safe_safe+safe_206180.1631+209157.3858	259
0Safe+0Safe_safe+safe_206180.1631+209400.4101	295
0Safe+0Safe_safe+safe_206180.1631+209597.4298	215
0Safe+0Safe_safe+safe_206180.1631+209963.3164	249
0Safe+0Safe_safe+safe_206180.1631+209973.3174	297
0Safe+0Safe_safe+safe_206180.1631+209990.3191	249
0Safe+0Safe_safe+safe_206180.1631+210140.3341	341
0Safe+0Safe_safe+safe_206180.1631+210313.3514	202
0Safe+0Safe_safe+safe_206180.1631+210540.3741	343
0Safe+0Safe_safe+safe_206180.1631+210725.6176	264
0Safe+0Safe_safe+safe_206180.1631+210743.6194	209
0Safe+0Safe_safe+safe_206180.1631+210809.6260	221
0Safe+0Safe_safe+safe_206180.1631+210925.6376	160
0Safe+0Safe_safe+safe_206180.1631+210935.6386	181
0Safe+0Safe_safe+safe_206180.1631+210946.6397	301
0Safe+0Safe_safe+safe_206180.1631+211135.6586	171
0Safe+0Safe_safe+safe_206276.1727+206276.1727	60
0Safe+0Safe_safe+safe_206276.1727+207086.1286	237
0Safe+0Safe_safe+safe_206276.1727+207133.1333	203
0Safe+0Safe_safe+safe_206276.1727+207268.1468	131
0Safe+0Safe_safe+safe_206276.1727+207272.1472	255
0Safe+0Safe_safe+safe_206276.1727+207295.1495	230
0Safe+0Safe_safe+safe_206276.1727+207412.862	192
0Safe+0Safe_safe+safe_206276.1727+207644.2345	287
0Safe+0Safe_safe+safe_206276.1727+207736.2437	193
0Safe+0Safe_safe+safe_206276.1727+207762.2463	202
0Safe+0Safe_safe+safe_206276.1727+207933.2634	260
0Safe+0Safe_safe+safe_206276.1727+208027.2728	199
0Safe+0Safe_safe+safe_206276.1727+208233.2934	190
0Safe+0Safe_safe+safe_206276.1727+208249.2950	193
0Safe+0Safe_safe+safe_206276.1727+208251.2952	217
0Safe+0Safe_safe+safe_206276.1727+208266.2967	251
0Safe+0Safe_safe+safe_206276.1727+208280.2981	223
0Safe+0Safe_safe+safe_206276.1727+208288.2989	275
0Safe+0Safe_safe+safe_206276.1727+208334.13	213
0Safe+0Safe_safe+safe_206276.1727+208691.451	212
0Safe+0Safe_safe+safe_206276.1727+208974.706	287
0Safe+0Safe_safe+safe_206276.1727+209014.742	207
0Safe+0Safe_safe+safe_206276.1727+209157.3858	221
0Safe+0Safe_safe+safe_206276.1727+209400.4101	217
0Safe+0Safe_safe+safe_206276.1727+209597.4298	228
0Safe+0Safe_safe+safe_206276.1727+209963.3164	207
0Safe+0Safe_safe+safe_206276.1727+209973.3174	287
0Safe+0Safe_safe+safe_206276.1727+209990.3191	208
0Safe+0Safe_safe+safe_206276.1727+210140.3341	266
0Safe+0Safe_safe+safe_206276.1727+210313.3514	199
0Safe+0Safe_safe+safe_206276.1727+210540.3741	251
0Safe+0Safe_safe+safe_206276.1727+210725.6176	223
0Safe+0Safe_safe+safe_206276.1727+210743.6194	226
0Safe+0Safe_safe+safe_206276.1727+210809.6260	219
0Safe+0Safe_safe+safe_206276.1727+210925.6376	117
0Safe+0Safe_safe+safe_206276.1727+210935.6386	172
0Safe+0Safe_safe+safe_206276.1727+210946.6397	262
0Safe+0Safe_safe+safe_206276.1727+211135.6586	182
0Safe+0Safe_safe+safe_207086.1286+207086.1286	105
0Safe+0Safe_safe+safe_207086.1286+207133.1333	289
0Safe+0Safe_safe+safe_207086.1286+207268.1468	172
0Safe+0Safe_safe+safe_207086.1286+207272.1472	296
0Safe+0Safe_safe+safe_207086.1286+207295.1495	297
0Safe+0Safe_safe+safe_207086.1286+207412.862	212
0Safe+0Safe_safe+safe_207086.1286+207644.2345	377
0Safe+0Safe_safe+safe_207086.1286+207736.2437	185
0Safe+0Safe_safe+safe_207086.1286+207762.2463	254
0Safe+0Safe_safe+safe_207086.1286+207933.2634	294
0Safe+0Safe_safe+safe_207086.1286+208027.2728	234
0Safe+0Safe_safe+safe_207086.1286+208233.2934	206
0Safe+0Safe_safe+safe_207086.1286+208249.2950	235
0Safe+0Safe_safe+safe_207086.1286+208251.2952	269
0Safe+0Safe_safe+safe_207086.1286+208266.2967	324
0Safe+0Safe_safe+safe_207086.1286+208280.2981	297
0Safe+0Safe_safe+safe_207086.1286+208288.2989	305
0Safe+0Safe_safe+safe_207086.1286+208334.13	272
0Safe+0Safe_safe+safe_207086.1286+208691.451	246
0Safe+0Safe_safe+safe_207086.1286+208974.706	349
0Safe+0Safe_safe+safe_207086.1286+209014.742	261
0Safe+0Safe_safe+safe_207086.1286+209157.3858	265
0Safe+0Safe_safe+safe_207086.1286+209400.4101	307
0Safe+0Safe_safe+safe_207086.1286+209597.4298	244
0Safe+0Safe_safe+safe_207086.1286+209963.3164	243
0Safe+0Safe_safe+safe_207086.1286+209973.3174	294
0Safe+0Safe_safe+safe_207086.1286+209990.3191	251
0Safe+0Safe_safe+safe_207086.1286+210140.3341	403
0Safe+0Safe_safe+safe_207086.1286+210313.3514	218
0Safe+0Safe_safe+safe_207086.1286+210540.3741	302
0Safe+0Safe_safe+safe_207086.1286+210725.6176	305
0Safe+0Safe_safe+safe_207086.1286+210743.6194	317
0Safe+0Safe_safe+safe_207086.1286+210809.6260	223
0Safe+0Safe_safe+safe_207086.1286+210925.6376	192
0Safe+0Safe_safe+safe_207086.1286+210935.6386	222
0Safe+0Safe_safe+safe_207086.1286+210946.6397	292
0Safe+0Safe_safe+safe_207086.1286+211135.6586	241
0Safe+0Safe_safe+safe_207133.1333+207133.1333	129
0Safe+0Safe_safe+safe_207133.1333+207268.1468	219
0Safe+0Safe_safe+safe_207133.1333+207272.1472	248
0Safe+0Safe_safe+safe_207133.1333+207295.1495	281
0Safe+0Safe_safe+safe_207133.1333+207412.862	262
0Safe+0Safe_safe+safe_207133.1333+207644.2345	304
0Safe+0Safe_safe+safe_207133.1333+207736.2437	233
0Safe+0Safe_safe+safe_207133.1333+207762.2463	228
0Safe+0Safe_safe+safe_207133.1333+207933.2634	347
0Safe+0Safe_safe+safe_207133.1333+208027.2728	224
0Safe+0Safe_safe+safe_207133.1333+208233.2934	242
0Safe+0Safe_safe+safe_207133.1333+208249.2950	252
0Safe+0Safe_safe+safe_207133.1333+208251.2952	279
0Safe+0Safe_safe+safe_207133.1333+208266.2967	297
0Safe+0Safe_safe+safe_207133.1333+208280.2981	300
0Safe+0Safe_safe+safe_207133.1333+208288.2989	284
0Safe+0Safe_safe+safe_207133.1333+208334.13	272
0Safe+0Safe_safe+safe_207133.1333+208691.451	267
0Safe+0Safe_safe+safe_207133.1333+208974.706	285
0Safe+0Safe_safe+safe_207133.1333+209014.742	244
0Safe+0Safe_safe+safe_207133.1333+209157.3858	326
0Safe+0Safe_safe+safe_207133.1333+209400.4101	300
0Safe+0Safe_safe+safe_207133.1333+209597.4298	253
0Safe+0Safe_safe+safe_207133.1333+209963.3164	291
0Safe+0Safe_safe+safe_207133.1333+209973.3174	351
0Safe+0Safe_safe+safe_207133.1333+209990.3191	209
0Safe+0Safe_safe+safe_207133.1333+210140.3341	404
0Safe+0Safe_safe+safe_207133.1333+210313.3514	282
0Safe+0Safe_safe+safe_207133.1333+210540.3741	346
0Safe+0Safe_safe+safe_207133.1333+210725.6176	290
0Safe+0Safe_safe+safe_207133.1333+210743.6194	288
0Safe+0Safe_safe+safe_207133.1333+210809.6260	261
0Safe+0Safe_safe+safe_207133.1333+210925.6376	191
0Safe+0Safe_safe+safe_207133.1333+210935.6386	209
0Safe+0Safe_safe+safe_207133.1333+210946.6397	353
0Safe+0Safe_safe+safe_207133.1333+211135.6586	211
0Safe+0Safe_safe+safe_207268.1468+207268.1468	60
0Safe+0Safe_safe+safe_207268.1468+207272.1472	190
0Safe+0Safe_safe+safe_207268.1468+207295.1495	183
0Safe+0Safe_safe+safe_207268.1468+207412.862	142
0Safe+0Safe_safe+safe_207268.1468+207644.2345	243
0Safe+0Safe_safe+safe_207268.1468+207736.2437	160
0Safe+0Safe_safe+safe_207268.1468+207762.2463	150
0Safe+0Safe_safe+safe_207268.1468+207933.2634	212
0Safe+0Safe_safe+safe_207268.1468+208027.2728	149
0Safe+0Safe_safe+safe_207268.1468+208233.2934	145
0Safe+0Safe_safe+safe_207268.1468+208249.2950	156
0Safe+0Safe_safe+safe_207268.1468+208251.2952	224
[truncated: 50,371 more rows]
