# Supplementary material for: Retro-2 protects cells from ricin toxicity by inhibiting ASNA1-mediated ER targeting and insertion of tail-anchored proteins
Source: eLife. 2019 Nov 1;8:e48434. doi: 10.7554/eLife.48434 (PMC6858068; doi:10.7554/eLife.48434)
Supplement: Figure 1—source data 4. [file elife-48434-fig1-data4.xlsx]

## Sheet: Legend
		Sheets	Description							Columns	#GeneID	Element #	casTLE Effect	casTLE Score	Minimum Effect Estimate	Maximum Effect Estimate
		Unt vs Ricin rep 1	casTLE results for untreated vs ricin treated replicate 1								Gene symbol 1 + gene symbol 2	Number of unique elements detected	Estimated effect size	Confidence score for estimated gene effect size	95% effect size credible interval lower bound	95% effect size credible interval upper bound
		Unt vs Ricin rep 2	casTLE results for untreated vs ricin treated replicate 2
		Unt vs Ricin combo	casTLE results for untreated vs ricin treated combo

## Sheet: Unt vs Ricin combo
#GeneID	Combo casTLE Effect	Combo casTLE Score	Minimum Effect Estimate	Maximum Effect Estimate
EIF3L+ERP44	2.7	521	2.4	3.3
COPS4+SEC23IP	3.1	517	2.8	3.8
SEC23IP+SRP54	3.1	517	2.8	3.8
ERP44+SGTA	3.1	517	2.8	3.8
SEC23B+ST3GAL4	3.2	516	2.8	3.9
COX7C+SEC23IP	3.1	516	2.8	3.8
ATP5A1+SEC23IP	3.1	516	2.8	3.9
ERP44+MRPL54	3.2	516	2.8	3.9
SPPL3+WRB	3.3	515	3	4.1
SPPL3+SRP54	3.3	515	3	4.1
SEC23B+TMED10	3.2	515	2.7	3.9
PSMC1+TRAPPC8	3.4	515	3.1	4.2
SGTA+SPPL3	3.3	515	2.9	4
SEC23IP+TUBB	3.2	515	2.8	4
SEC23IP+SGTA	3.3	515	3	4
ANAPC2+SPPL3	3.1	515	2.8	3.9
PPP1R8+SEC23IP	3.3	515	3.1	4.1
SEC23B+TMED2	3.3	515	2.9	4
SEC23IP+VPS35	3.2	515	2.9	4
EIF3L+SUCO	3.3	514	3	4.1
ST3GAL4+TRAPPC8	3.3	514	3	4.1
AP2A1+SEC23IP	3.5	514	3.1	4.2
AP2A1+ERP44	3.4	514	3	4.2
ARL1+SEC24C	3.4	514	3	4.2
ERP44+WRB	3.5	514	3.1	4.2
ERP44+GET4	3.4	514	3	4.2
GOLIM4+SEC24C	3.5	513	3.3	4.3
PTPN1+SEC24C	3.5	513	3.2	4.3
SEC24B+TRAPPC5	3.4	513	3.1	4.3
ATP5A1+ERP44	3.4	513	3	4.2
PSMC6+SEC24C	3.6	513	3.2	4.4
SGTA+SUCO	3.5	513	3.2	4.3
SUCO+TMED10	3.6	513	3.3	4.4
RPL35+SUCO	3.5	513	3.1	4.3
SEC23IP+WRB	3.5	513	3.2	4.4
PSMC1+SEC24C	3.6	512	3.3	4.5
PSMD2+SUCO	3.6	512	3	4.4
GET4+SEC23IP	3.6	512	3.2	4.4
DCAF13+SUCO	3.7	512	3.4	4.5
PSMA7+SUCO	3.6	512	3.3	4.5
PSMD2+SEC24C	3.6	512	3.2	4.4
SUCO+TMED2	3.7	512	3.4	4.6
RAB14+UGP2	3.8	512	3.5	4.6
RAB14+TRAPPC11	3.8	512	3.5	4.6
ERP44+SRP54	3.7	512	3.4	4.5
GET4+SUCO	3.7	512	3.4	4.5
PRPF39+SEC24C	3.8	512	3.4	4.6
COPS4+TRAPPC11	3.5	512	3.1	4.4
AKAP9+TRAPPC8	3.7	512	3.4	4.6
SEC24C+ST3GAL4	3.7	512	3.4	4.6
RAB14+SPPL3	3.7	512	3.2	4.4
AKAP9+SEC23B	3.7	512	3.4	4.5
COPS4+SUCO	3.7	512	3.3	4.5
ERP44+PPP1R8	3.8	512	3.4	4.6
ERP44+MRPL51	3.3	512	3	4.4
SEC22B+ST3GAL4	3.8	511	3.4	4.7
TMED10+TRAPPC11	3.7	511	3.3	4.6
RAB14+SEC24A	3.7	511	3.3	4.6
IFFO1+TRAPPC8	3.6	511	3.2	4.5
COG4+SEC23B	3.8	511	3.3	4.6
SEC24C+WDR11	3.8	511	3.3	4.6
GOLIM4+SEC23B	3.6	511	3.3	4.6
PRPF39+TRAPPC8	3.8	511	3.4	4.7
BAG6+SPPL3	3.7	511	3.4	4.6
DCAF13+SEC23IP	3.8	511	3.4	4.7
SUCO+WRB	3.8	511	3.4	4.7
SEC23IP+SEC24B	3.9	511	3.7	4.8
GOLIM4+TRAPPC8	3.8	511	3.5	4.7
GET4+TRAPPC11	3.8	511	3.4	4.7
CCNA2+SEC24C	3.8	511	3.4	4.6
ERP44+RAB14	3.9	511	3.5	4.7
SEC24B+SPPL3	4.1	510	3.7	4.9
PRPF39+SEC23B	4.1	510	3.7	4.9
CCNA2+TRAPPC8	3.5	510	3	4.7
SGTA+TRAPPC8	3.9	510	3.7	4.8
ATP5A1+SEC24C	4	510	3.7	4.9
SEC24A+STX5	3.8	510	3.3	4.8
AKAP9+SEC24C	4	510	3.7	4.9
RAB14+SEC23IP	4	510	3.7	4.8
SRP54+UGP2	4	510	3.7	4.9
CAMLG+GET4	4	510	3.6	4.9
SGTA+TRAPPC11	3.8	510	3.4	4.8
ATP5A1+TRAPPC8	4	510	3.5	4.8
PTPN1+SEC23B	3.9	510	3.6	4.8
HNRNPK+SEC24C	4	510	3.7	4.9
TRAPPC8+TUBB	3.9	510	3.6	4.8
CHAF1A+SEC23IP	3.9	510	3.5	4.8
ERP44+STX5	3.9	510	3.6	4.9
PPP1R8+SUCO	3.9	510	3.6	4.8
TRAPPC11+WRB	3.9	510	3.5	4.8
EIF3L+VPS53	3.9	510	3.6	4.8
PSMD3+SEC24C	4	510	3.7	5
GOLIM4+TRAPPC3	3.9	510	3.6	4.8
DCTN1+ERP44	4	510	3.7	4.9
BAG6+SEC23IP	3.9	510	3.5	4.8
ASNA1+TMED10	4	509	3.6	4.9
MRPL51+SUCO	4.2	509	3.5	5
TMED10+TRAPPC8	4.1	509	3.8	5
COPS4+SEC23B	4.2	509	3.9	5.1
PSMC6+SEC23B	4	509	3.6	5
TRAPPC8+WDR43	4.1	509	3.5	5
KDM1A+SEC24C	4.1	509	3.7	5
KDM1A+TRAPPC8	4	509	3.6	4.9
RAB14+TRAPPC8	4.2	509	3.8	5
ASNA1+PSMC1	4.1	509	3.6	4.9
EIF3L+TRAPPC8	4.1	509	3.8	5.1
ARL1+SEC23B	2.8	509	2.5	3.5
VPS53+WRB	4	509	3.6	4.9
ATP5A1+SUCO	3.7	509	3.1	4.8
RPL35+TRAPPC8	4.1	509	3.8	5
SEC24A+TRAPPC5	4.1	509	3.8	5
KDM1A+SUCO	3.8	509	3.4	4.8
MRPL54+SUCO	3.6	509	3.2	4.4
SEC23IP+STX5	4.2	509	3.9	5.1
PSMD1+TRAPPC8	4.2	509	3.6	5
RPL35+SEC24C	4.1	509	3.8	5
COPS4+SEC24C	4.2	509	3.9	5.1
PSMC1+SEC23B	4.1	509	3.8	5
THOC5+TRAPPC8	4.1	509	3.7	5
RPL35A+TRAPPC8	4.1	509	3.7	5
SRP54+TRAPPC11	4.1	509	3.7	4.9
CHAF1A+TRAPPC8	4	509	3.7	4.9
SON+TRAPPC8	4.1	509	3.6	5
COG4+SEC24C	4.2	509	3.6	5
ERP44+VPS35	4	509	3.7	5
TRAPPC5+VPS53	4	509	3.6	4.9
DCTN1+SUCO	4.1	509	3.7	5
TRAPPC8+WRB	4.1	509	3.8	5
SRPRB+SUCO	4.1	509	3.8	5
SPPL3+UBR4	4.3	508	3.9	5.3
MRPL51+SEC23IP	3.9	508	3.5	5
ASNA1+KDM1A	4.2	508	3.8	5.1
EIF3L+SEC24C	4.3	508	4	5.2
ASNA1+PTPN1	3.9	508	3.6	5.1
AP2A1+TRAPPC3	4.2	508	3.7	5.1
ATP5B+TRAPPC8	4.2	508	3.7	5.2
PSMD2+TRAPPC3	4.3	508	4	5.3
TRAPPC3+TUBB	4.1	508	3.8	5.1
ERP44+UBR4	4.3	508	3.9	5.2
SEC23B+THOC5	4.3	508	4	5.3
AP1M1+GMDS	4.3	508	3.9	5.2
TMED2+UGP2	4.2	508	3.8	5.1
BAG6+TRAPPC8	4.2	508	3.9	5.1
MRPL54+TRAPPC8	4.1	508	3.7	5.1
UBR4+UGP2	4.3	508	3.9	5.2
TMED2+TRAPPC8	4.3	508	3.9	5.2
TMED10+UGP2	4.2	508	3.8	5.1
AKAP9+TRAPPC3	4.2	508	3.9	5.2
SEC23B+TUBB	4.3	508	4	5.2
SEC23B+SEC24B	4.3	508	4.1	5.3
COX7C+SEC24C	4.2	508	3.9	5.2
STX5+TRAPPC11	4.2	508	3.8	5.1
BAG6+SUCO	4.3	508	3.8	5.1
SEC23IP+SRPRB	4.3	508	3.9	5.2
ATP5A1+SEC23B	4.3	508	3.9	5.2
TRAPPC8+UBR4	4.4	508	4.1	5.3
SEC24C+THOC5	4.3	508	4	5.3
SPATA5L1+TRAPPC8	4.1	508	3.7	5.1
PPP1R8+SEC22B	4.3	508	3.9	5.2
ERP44+VPS52	4.3	508	4.1	5.3
PSMD2+SEC23B	4.2	508	3.8	5.2
COPS4+TRAPPC8	4.3	508	3.8	5.2
RPL35A+SUCO	3.8	508	3.4	5
PSMD11+SEC23IP	3.8	508	3.3	5.1
GET4+TRAPPC8	4.2	508	3.9	5.2
TRAPPC5+TRAPPC8	4.1	508	3.8	5.1
SAMM50+TRAPPC8	4.2	508	3.7	5
STX5+SUCO	4.2	508	3.8	5.1
SEC24A+SPPL3	4.3	508	4.1	5.3
SEC24B+TRAPPC8	4.5	507	4.2	5.5
RPS6+TRAPPC8	4.5	507	4	5.4
TMED10+TRAPPC3	4.5	507	4.2	5.5
SCFD1+UGP2	4.3	507	3.8	5.3
AP2A1+TRAPPC8	4.3	507	3.9	5.4
MRPL51+SEC24C	4.4	507	4.1	5.4
KDM1A+SEC22B	4.4	507	4	5.3
ASNA1+IFFO1	4.3	507	4	5.3
RAB14+TRAPPC3	4.3	507	4	5.3
PSMA7+SEC24C	4.4	507	3.9	5.3
EIF3L+TRAPPC3	4.5	507	4.2	5.5
ASNA1+EIF6	4.1	507	3.7	5.1
COPA+SEC24C	4.5	507	4.1	5.4
RPL35A+SEC23B	4.4	507	4.1	5.4
RAB14+SUCO	4.5	507	4.1	5.4
BAG6+TRAPPC3	4.5	507	4.2	5.5
TRAPPC3+TRAPPC5	4.5	507	4	5.4
ERP44+TRAPPC5	4.4	507	4.1	5.4
ASNA1+SEC24A	4.5	507	4.2	5.4
EIF3H+TRAPPC3	4.4	507	4	5.4
SCFD1+SEC23IP	4.3	507	3.9	5.3
RPL35+SEC23B	4.4	507	4.1	5.4
SEC24B+UGP2	4.5	507	4.1	5.4
PSMD1+TRAPPC3	3.9	507	3.4	4.7
RPL7L1+SEC23B	4.4	507	4	5.4
STX5+TRAPPC8	4.3	507	4	5.4
SEC24C+TUBB	4.4	507	4	5.4
MRPL51+SPPL3	3.1	507	2.7	3.9
EIF3L+SEC23B	4.5	507	4.1	5.4
ASNA1+ST3GAL4	4.3	507	3.9	5.4
ERP44+SEC24B	4.3	507	3.9	5.2
ERP44+VPS54	4.4	507	4	5.3
SEC23B+SEC24A	4.5	507	4.2	5.5
BAG6+SEC22B	4.4	507	4.1	5.4
EIF3H+SEC23B	4.4	507	4	5.4
SEC24B+TRAPPC11	4.3	507	4	5.3
EIF6+SEC24C	4.3	507	3.8	5.3
SEC24B+SUCO	4.4	507	4	5.3
ASNA1+GOLIM4	4.3	507	4	5.3
SPPL3+TRAPPC5	4.3	507	4	5.3
SCFD1+SEC24C	4.4	507	4	5.3
CAMLG+TUBB	4.3	507	3.9	5.3
CAMLG+PRPF39	4.3	507	3.9	5.2
SEC23IP+SEC24A	4.5	507	4.2	5.4
SEC24C+WRB	4.5	507	4.1	5.4
PSMD1+SEC23B	4.3	507	3.8	5.2
GET4+SEC24C	4.3	507	4	5.3
ATP5A1+TRAPPC3	4.4	507	4	5.3
CAMLG+SEC24A	4.4	507	3.9	5.4
MRPL54+SEC23B	4.4	507	4	5.3
ERP44+SARS	3.6	507	3.2	4.4
SUCO+TRAPPC5	4.3	507	4	5.3
SEC23IP+TRAPPC5	4.4	507	4	5.3
ANAPC2+TRAPPC3	4.5	506	4.2	5.5
EIF3D+SEC24C	4.6	506	4.2	5.6
ASNA1+THOC5	4.2	506	3.9	5.1
SPCS3+SPPL3	4.6	506	4.2	5.5
PPP1R8+TRAPPC8	4.5	506	4.1	5.5
SUCO+WDR3	4.4	506	3.8	5.4
SARS+SUCO	4.5	506	4	5.5
SUCO+VPS52	4.6	506	4.2	5.5
PSMC1+TRAPPC3	4.2	506	3.8	5.5
SEC22B+SEC23IP	4.6	506	4.2	5.6
SRPRB+TRAPPC3	4.5	506	4.2	5.5
COX7C+SEC23B	4.6	506	4.2	5.5
PPP1R8+SEC23B	4.6	506	4.3	5.6
SEC23B+WRB	4.5	506	4.2	5.5
SEC23B+SGTA	4.6	506	4.3	5.6
RPL35+TRAPPC3	4.5	506	4.1	5.5
SEC24A+TRAPPC11	4.6	506	4.3	5.6
RPL35+SEC23IP	2.8	506	2.5	3.5
COX7C+TRAPPC8	4.6	506	4.1	5.6
ASNA1+PSMA7	4.5	506	3.9	5.4
SEC23B+SPATA5L1	4.6	506	4.1	5.6
SEC23IP+VPS52	4.5	506	4	5.5
MRPL54+VPS53	4.4	506	3.8	5.4
SEC23IP+UBR4	4.1	506	3.8	5
SEC24A+SUCO	4.5	506	4.3	5.6
BAG6+SEC24C	4.6	506	4.3	5.5
SEC22B+THOC5	4.6	506	4.1	5.6
SPPL3+VPS53	4.5	506	4.2	5.5
SRP54+SUCO	4.4	506	4	5.4
TRAPPC8+VPS35	4.7	506	4.3	5.7
ASNA1+PSMD11	4.5	506	4.2	5.5
UGP2+VPS53	4.5	506	4.2	5.5
SEC24C+VCP	4.6	506	4.2	5.5
SUCO+VCP	3.7	506	3.3	4.6
ERP44+SPCS3	4.6	506	4.3	5.7
BAG6+ERP44	4.1	506	3.7	5.4
ASNA1+WRB	4.6	506	4.2	5.6
SEC23B+WDR43	4.4	506	3.8	5.4
PPP1R8+SEC24C	4.6	506	4.3	5.6
SEC24C+SGTA	4.5	506	4.2	5.5
PSMA7+TRAPPC8	4.1	506	3.6	5.3
SEC22B+TMED10	4.6	506	4.1	5.5
SPPL3+VPS54	4.5	506	4	5.5
SEC24A+SEC24B	4.6	506	4.1	5.6
GET4+TRAPPC3	4.5	506	4.2	5.5
SEC23IP+SPPL3	4.6	506	4.4	5.6
SEC24C+STX5	4.5	506	4.2	5.6
ASNA1+NAA25	4.3	506	3.9	5.3
AKAP9+ASNA1	4.5	506	4	5.4
HNRNPK+SEC23B	4.5	505	4.3	5.7
SPPL3+UGP2	4.8	505	4.5	5.8
COPA+TRAPPC8	4.6	505	4.1	5.6
ASNA1+DCTN1	4.7	505	4.4	5.7
TRAPPC3+VPS52	4.8	505	4.3	5.7
CAMLG+COPS4	4.7	505	4.4	5.8
RAB14+SEC24B	3	505	2.6	3.8
EIF3A+SEC24C	4.7	505	4.1	5.6
SGTA+TRAPPC3	4.8	505	4.4	5.8
ATP5A1+SEC22B	4.6	505	4	5.6
ASNA1+RRS1	4.7	505	4.3	5.7
PSMB6+SEC24C	4.7	505	4.2	5.7
SEC24A+UGP2	4.7	505	4.4	5.7
SEC23B+SRP54	4.8	505	4.5	5.8
PTPN1+SEC22B	4.7	505	4.1	5.7
SRP54+TRAPPC8	4.6	505	4.2	5.6
SEC24B+TRAPPC3	4.8	505	4.4	5.8
ASNA1+RPL35	4.6	505	4.1	5.6
ASNA1+EIF3A	4.8	505	4.3	5.8
SEC23IP+SF3A1	3.3	505	2.9	4.1
CAMLG+UGP2	4.6	505	4.3	5.7
STX5+TRAPPC3	4.7	505	4.3	5.7
RPL35+SEC22B	4.7	505	4.3	5.7
RRS1+SEC24C	4.8	505	4.4	5.8
ASNA1+SEC24B	4.6	505	4.1	5.7
PSMD11+SEC23B	4.7	505	4.3	5.7
SPCS3+UGP2	4.7	505	4.2	5.6
GET4+SEC23B	4.8	505	4.3	5.7
CAMLG+SEC24C	4.8	505	4.4	5.8
MRPL54+SEC24C	4.5	505	4.1	5.6
SEC24C+VPS35	4.7	505	4.3	5.7
SEC22B+TUBB	4.8	505	4.4	5.8
ERP44+SEC24A	4.7	505	4.4	5.7
SEC22B+TMED2	4.6	505	4.2	5.6
ANAPC2+SEC23B	4.8	505	4.3	5.7
ATP5B+SEC23B	4.7	505	4.3	5.7
SEC23IP+SPCS3	4.7	505	4.4	5.7
SUCO+TUBB	3.6	505	3.2	4.5
ASNA1+SPPL3	4.9	505	4.6	5.9
ASNA1+PRPF39	4.5	505	4	5.6
SEC24C+SON	4.8	505	4.2	5.8
EIF3A+SEC23B	4.7	505	4.1	5.6
ASNA1+MRPL51	4.8	505	4.3	5.7
RTF1+SEC24C	4.7	505	4.4	5.7
SEC23B+SF3B2	4.7	505	4.3	5.7
COPS4+TRAPPC3	4.7	505	4.2	5.7
SEC23IP+SUCO	4.8	505	4.6	5.9
PSMD11+SEC24C	4.7	505	4.1	5.7
SEC24C+SRP54	4.7	505	4.5	5.8
ASNA1+COPS4	4.6	505	4.1	5.6
ASNA1+TUBB	4.6	505	4.2	5.7
AP2A1+SEC24C	4.8	505	4.3	5.8
CAMLG+MRPL54	4.7	504	4.3	5.9
SEC23B+UBR4	4.9	504	4.5	5.9
GET4+SEC22B	4.9	504	4.2	5.9
DCAF13+SEC23B	5	504	4.6	6.1
SEC24C+SF3B2	4.7	504	4.3	5.8
SAMM50+SEC23B	4.8	504	4.5	5.9
COPA+TRAPPC3	4.8	504	4.4	5.9
TRAPPC3+VPS53	4.8	504	4.4	5.9
SEC22B+SEC24B	5	504	4.6	6
SEC24C+WDR3	4.8	504	4.4	5.9
DCTN1+SEC22B	4.8	504	4.4	5.9
SUCO+VPS54	4.8	504	4.3	5.9
EIF3H+SEC22B	4.8	504	4.2	5.8
GMDS+RAD21	4.8	504	4.4	5.8
ASNA1+GET4	4.9	504	4.3	5.9
ANAPC2+SEC24C	5	504	4.3	5.9
SRP54+TRAPPC3	5	504	4.7	6.1
ASNA1+PPP1R8	4.9	504	4.2	5.9
ASNA1+SPATA5L1	4.8	504	4.3	5.8
ATP5B+SUCO	3.5	504	3.1	4.3
COX7C+TRAPPC3	4.8	504	4.3	5.8
ASNA1+EIF3L	4.8	504	4.4	5.8
TRAPPC5+UGP2	4.8	504	4.4	5.9
ATP5B+ERP44	4.4	504	3.9	5.7
SEC24A+TRAPPC3	4.9	504	4.5	5.9
PSMB6+TRAPPC3	4.9	504	4.3	5.9
SPPL3+TRAPPC11	4.8	504	4.5	5.9
MRPL54+SEC22B	4.9	504	4.2	5.8
DCTN1+TRAPPC8	4.9	504	4.4	5.9
SEC23IP+VPS54	4.7	504	4.3	5.8
GMDS+ST3GAL4	4.9	504	4.6	5.9
SEC24C+VPS52	5	504	4.8	6.1
ASNA1+SEC24C	4.9	504	4.6	6
TRAPPC11+TRAPPC8	4.9	504	4.4	5.9
SEC24B+SEC24C	4.9	504	4.6	5.9
NAA25+SEC23B	4.8	504	4.2	5.8
SPPL3+SUCO	5	504	4.7	6
SEC23IP+TRAPPC11	5	504	4.7	6
SEC24C+UTP20	4.9	504	4.5	6
TMED2+TRAPPC3	4.9	504	4.3	5.9
SEC24B+VPS53	4.7	504	4.3	5.8
MYBL2+SUCO	4.4	504	3.8	5.7
AP2A1+SEC23B	4.8	504	4.4	5.9
CHAF1A+SEC24C	4.8	504	4.3	5.9
DCAF13+TRAPPC8	4.4	504	4	5.7
DCTN1+TRAPPC3	4.9	504	4.5	6
DCAF13+SEC24C	4.7	504	4.3	5.9
RTF1+TRAPPC8	4.8	504	4.4	5.9
KDM1A+SEC23B	4.4	504	4.1	5.7
TRAPPC3+WRB	4.8	504	4.4	5.8
ASNA1+PSMD2	4.7	504	4.2	5.7
CAMLG+SUCO	4.9	504	4.6	6
RPL4+SEC24C	4.9	504	4.4	5.8
DCTN1+SEC23B	4.8	504	4.3	5.8
SEC24C+SPCS3	4.9	504	4.6	5.9
TRAPPC8+VPS52	4.8	504	4.4	5.9
EIF3H+TRAPPC8	4.5	504	4	5.8
ASNA1+WDR43	4.9	504	4.4	6
PSMD3+SEC23IP	3.4	504	2.9	4.1
SPPL3+TRAPPC8	4.9	504	4.6	5.9
CAMLG+IFFO1	4.6	504	4.2	5.6
RAB14+SEC24C	5	504	4.7	6
SEC24A+VPS53	4.9	504	4.6	6
TRAPPC11+VPS53	4.9	504	4.5	6
SEC23IP+TRAPPC8	4.9	504	4.6	5.9
COG4+GMDS	5	504	4.7	6.1
TRAPPC8+UGP2	5.1	503	4.8	6.2
SEC23B+TRAPPC5	5.1	503	4.8	6.2
ASNA1+ERP44	5.1	503	4.8	6.2
TRAPPC3+WDR3	4.9	503	4.4	6.1
CAMLG+TRAPPC8	4.9	503	4.3	6
CAMLG+SPPL3	5.1	503	4.6	6.1
CAMLG+SEC23IP	5.1	503	4.8	6.2
SEC24C+SRPRB	5.1	503	4.5	6.1
RPL4+SEC23B	5	503	4.5	6.1
SEC22B+SEC24C	5	503	4.6	6.1
CHAF1A+SEC23B	5.1	503	4.6	6.2
EIF3L+SEC22B	4.9	503	4.4	6
ATP5B+TRAPPC3	5	503	4.5	6
ASNA1+ATP5A1	4.8	503	4.2	6
BAG6+SEC23B	5.1	503	4.7	6.1
GMDS+MGAT5	5.1	503	4.8	6.1
ASNA1+UGP2	4.9	503	4.6	6.1
ASNA1+SUCO	4.9	503	4.6	6
TRAPPC8+WDR3	4.9	503	4.4	6
ASNA1+TRAPPC3	4.8	503	4.4	6
SEC23B+VPS35	5.2	503	4.7	6.2
SEC24C+SPATA5L1	5.1	503	4.4	6.2
CAMLG+DCAF13	5	503	4.4	6.1
CAMLG+SEC23B	5.1	503	4.8	6.2
ERP44+TRAPPC11	5.1	503	4.7	6.2
SEC24A+TRAPPC8	5	503	4.7	6
RPL4+TRAPPC3	5	503	4.3	6
MRPL54+TRAPPC3	4.8	503	4.3	5.9
SAMM50+SEC24C	4.7	503	4.3	5.9
SF3A1+TRAPPC8	4.2	503	3.8	5.4
SEC24C+TRAPPC8	5	503	4.7	6.1
SEC24C+TRAPPC5	4.9	503	4.5	6
ERP44+SPPL3	5.1	503	4.8	6.2
SEC23B+UTP20	5	503	4.5	6
ERP44+RPL35A	4.4	503	3.5	5.4
SEC22B+UGP2	5	503	4.6	6.1
ASNA1+COX7C	5	503	4.5	6.1
ERP44+VPS53	5	503	4.6	6.1
SEC23B+SEC24C	5	503	4.7	6
EIF3D+SEC23B	4.9	503	4.3	6
ASNA1+RPL7L1	5.1	503	4.6	6.1
AP2A1+UGP2	4.8	503	4.3	5.9
SEC23B+STX5	5.1	503	4.8	6.2
CAMLG+VPS35	5.1	503	4.7	6.2
SEC22B+WRB	5	503	4.4	6.1
PSMD3+SEC22B	4.7	503	4.2	6
PSMA7+SEC23B	4.8	503	4.3	5.9
SEC22B+TRAPPC5	5.1	503	4.5	6.1
HNRNPK+TRAPPC3	3.6	503	3.3	4.5
SPPL3+TRAPPC3	5.1	503	4.7	6.1
SUCO+TRAPPC8	5.1	503	4.8	6.2
CCT4+SEC24C	4.9	503	4.4	6
SEC24C+TTK	5.1	503	4.7	6.2
SEC23B+VPS52	5.1	503	4.8	6.2
TRAPPC8+UBA3	5	503	4.5	6.1
PSMD1+SEC24C	4.8	503	4.3	6
BAG6+CAMLG	4.7	503	4.2	6
ERP44+UGP2	5	503	4.7	6.1
ERP44+SEC23IP	5.1	503	4.9	6.2
SUCO+TRAPPC3	5.1	503	4.8	6.2
CAMLG+ERP44	5.1	503	4.7	6.2
SEC23IP+TRAPPC3	5	503	4.7	6.1
CAMLG+MRPL51	5.2	502	4.3	6.3
SARS+SEC23B	5.1	502	4.7	6.3
RPS6+TRAPPC3	5.3	502	4.8	6.4
SCFD1+TRAPPC8	5.2	502	4.5	6.2
SCFD1+TRAPPC3	5.3	502	4.7	6.4
ERP44+UBA3	3.5	502	3	4.3
CCT3+SEC24C	5.2	502	4.7	6.3
CAMLG+TRAPPC3	5.3	502	4.8	6.4
PSMC1+SPPL3	2.8	502	2.5	3.5
BAG6+SEC24A	3.1	502	2.8	3.8
SEC24C+SPPL3	5.2	502	4.9	6.3
DCTN1+SEC24C	5.2	502	4.8	6.3
ASNA1+SPCS3	5.2	502	4.8	6.3
MRPL51+TRAPPC8	4.7	502	4.2	6.1
SEC23B+SEC23IP	5.2	502	4.9	6.3
ASNA1+EIF3H	5.2	502	4.8	6.3
CCNA2+GMDS	5.3	502	5	6.4
RTF1+SEC23B	5.1	502	4.7	6.3
DCTN1+SEC23IP	5.2	502	4.5	6.3
CCT4+SEC23B	4.7	502	4.1	6.1
ERP44+TRAPPC8	5.2	502	5	6.4
TRAPPC11+TRAPPC3	5.1	502	4.6	6.2
TRAPPC3+UBR4	5.1	502	4.5	6.2
PRPF39+SUCO	3.1	502	2.8	4.1
PRPF39+SEC22B	5.3	502	4.8	6.4
SEC24C+TRAPPC3	5.2	502	4.9	6.4
ERP44+SCFD1	4.5	502	3.8	5.5
ASNA1+VPS52	5.1	502	4.6	6.3
MRPL51+SEC23B	5.2	502	4.5	6.2
ASNA1+HNRNPK	4.8	502	4.4	6.2
SEC23IP+UGP2	5.2	502	4.9	6.3
KDM1A+SEC23IP	2.9	502	2.5	3.6
SUCO+UGP2	5.2	502	4.9	6.3
SEC23B+SPCS3	5.3	502	4.9	6.4
ASNA1+BAG6	5.2	502	4.5	6.2
ASNA1+MGAT5	3.6	502	3.3	4.5
COX7C+SEC22B	5	502	4.6	6.2
RAB14+SEC23B	5.2	502	4.9	6.3
SPCS3+TRAPPC8	5.2	502	4.8	6.3
SEC24C+TRAPPC11	5.3	502	4.9	6.4
ASNA1+MRPL54	5.2	502	4.6	6.3
SEC22B+TRAPPC8	5.1	502	4.6	6.2
SEC23IP+SEC24C	5.2	502	4.9	6.3
TRAPPC11+UGP2	5.3	502	4.8	6.3
TRAPPC3+UGP2	5.2	502	4.8	6.3
MRPL51+TRAPPC3	5.2	502	4.6	6.2
RPL35A+SEC23IP	3.5	502	3.1	4.3
CAMLG+EIF3H	5.3	502	4.7	6.3
SUCO+UBR4	5.1	502	4.7	6.2
RPL7L1+TRAPPC3	5.5	501	4.7	6.5
CAMLG+SPCS3	5.2	501	4.7	6.4
COG3+GMDS	5.5	501	5	6.6
ASNA1+TRAPPC11	5.2	501	4.6	6.3
SEC23B+TRAPPC8	5.5	501	5.3	6.7
SEC22B+VPS52	4.9	501	4.6	6.1
SEC22B+VPS53	5.4	501	4.9	6.5
GMDS+HNRNPK	5.3	501	4.8	6.4
SCFD1+SUCO	4.5	501	4.1	5.5
MRPL51+SEC22B	5.4	501	4.9	6.6
COPS4+ERP44	3.3	501	2.9	4.1
SEC23B+VPS54	5.5	501	5	6.6
KDM1A+TRAPPC3	4.5	501	3.9	5.8
SUCO+VPS53	5.4	501	5.1	6.5
GMDS+PTPN1	5.4	501	4.9	6.5
CAMLG+SF3B2	4.8	501	4.2	5.9
ASNA1+TRAPPC5	5.2	501	4.6	6.3
RRM1+SEC23B	4.9	501	4.5	6.3
TRAPPC3+UBA3	5.3	501	4.7	6.5
MYBL2+SEC23B	5	501	4.4	6.4
PRPF39+TRAPPC3	4.6	501	4.2	5.5
SARS+TRAPPC8	4.9	501	4.2	6.2
PPP1R8+TRAPPC11	4.9	501	4.1	6.2
SEC23IP+VPS53	5.5	501	5.2	6.6
SEC22B+SPCS3	5.2	501	4.7	6.3
GMDS+SPATA5L1	5.3	501	5	6.5
SEC23B+SRPRB	4.9	501	4.6	6.3
PSMC1+SEC23IP	3.1	501	2.5	4.1
COPS4+SEC22B	5.3	501	4.7	6.5
ERP44+SEC24C	5.4	501	5.2	6.6
ASNA1+UTP20	5.1	501	4.6	6.3
GMDS+GOLIM4	5.5	501	5.2	6.6
ASNA1+VPS53	5.4	501	4.8	6.5
GMDS+TUBB	5.5	501	5.2	6.6
SEC23B+WDR3	5.4	501	4.9	6.6
SARS+VPS53	4.9	501	4.2	6.2
ASNA1+VPS35	5.4	501	4.9	6.5
ASNA1+SF3B2	5	501	4.6	6.4
ATP5A1+CAMLG	4.3	501	3.9	5.3
ASNA1+SEC23IP	5.5	501	5	6.6
CAMLG+COX7C	5.3	501	4.7	6.4
SARS+SPPL3	3.8	501	3.3	4.6
SEC23B+SUCO	5.4	501	5.2	6.6
SEC22B+TRAPPC3	5.3	501	4.8	6.5
SEC24C+UGP2	5.5	501	5.2	6.6
GMDS+PRPF39	5.5	501	5.2	6.6
RPL35A+SEC24C	5.3	501	4.6	6.6
VPS35+VPS54	5.4	501	4.7	6.5
SEC23B+TRAPPC11	5.5	501	5.2	6.6
SPCS3+SUCO	5.4	501	5	6.5
RRS1+TRAPPC3	5.4	501	4.8	6.5
GET4+GMDS	5.7	500	5.3	6.8
ASNA1+DCAF13	5.4	500	4.9	6.6
ASNA1+SEC23B	5.7	500	5.1	6.8
SEC24C+SUCO	5.6	500	5.3	6.7
EIF3A+SEC22B	4.7	500	4.2	5.7
SEC23B+VPS53	5.7	500	5.5	6.9
CAMLG+DCTN1	4.6	500	4.1	5.6
GMDS+SMC3	5.5	500	5	6.7
ATP5B+SEC24C	5.5	500	4.7	6.7
EIF3H+SEC24C	5.5	500	4.8	6.7
SEC23B+TRAPPC3	5.6	500	5.3	6.8
ASNA1+CAMLG	5.7	500	5.1	6.8
TRAPPC8+TTK	5.5	500	4.3	6.6
COPS4+GMDS	5.7	500	5.3	6.8
PSMD3+SEC23B	5.4	500	4.6	6.6
SEC23B+SPPL3	5.6	500	5.2	6.7
SEC24C+SNRPD3	5.3	500	4.7	6.6
ASNA1+SRPRB	5.6	500	4.8	6.6
GMDS+PPP1R8	5.6	500	5.2	6.7
SARS+TRAPPC3	5.5	500	5.1	6.7
SUCO+TRAPPC11	5.4	500	4.9	6.6
SEC24C+VPS53	5.7	500	5.2	6.8
ERP44+TRAPPC3	5.6	500	5.3	6.9
ASNA1+VCP	5.5	500	5.1	6.7
CCT3+SEC23B	5.5	500	4.8	6.7
SEC23B+UGP2	5.7	500	5.3	6.8
ATP5A1+GMDS	5.5	500	5.1	6.6
SEC22B+SPPL3	5.6	500	5	6.6
SON+TRAPPC3	4.4	500	4	5.4
CAMLG+TRAPPC11	5.4	500	4.9	6.6
EIF3A+GMDS	5.7	500	5.3	6.9
BAG6+VPS53	4.1	500	3.6	5.1
CAMLG+SRPRB	5.5	500	4.8	6.6
AKAP9+GMDS	5.5	500	5.2	6.7
ASNA1+SARS	5.4	500	4.6	6.5
GMDS+RPL35	5.7	500	5.3	6.8
AP2A1+SUCO	3.3	500	3	4.1
ERP44+SEC23B	5.7	500	5.4	6.9
GMDS+SPPL3	5.8	499	5.5	6.9
GMDS+SCFD1	5.9	499	5.5	7.1
CAMLG+TRAPPC5	5.7	499	5	6.9
TRAPPC3+VPS54	5.6	499	5	6.8
SEC22B+SEC24A	5.6	499	4.9	6.8
PPP1R8+TRAPPC3	5.6	499	4.6	6.7
DCTN1+GMDS	5.6	499	5.3	6.9
ASNA1+STX5	4.1	499	3.6	5
GET4+SPPL3	3.3	499	2.9	4.1
SEC22B+SUCO	5.7	499	5.3	7
GMDS+WRB	5.9	499	5.6	7.1
ASNA1+TRAPPC8	5.8	499	5.2	7
GMDS+THOC5	5.8	499	5.4	7
GMDS+PSMC6	5.8	499	5.2	6.9
GMDS+PSMC1	5.8	499	5.4	7
SEC23B+SNRPD3	5.5	499	4.7	6.7
GMDS+PSMD3	5.7	499	5.4	6.9
TRAPPC3+TRAPPC8	5.6	499	4.6	6.7
UGP2+WRB	4.1	499	3.6	5
GMDS+RPL35A	5.8	499	5.5	7
COPA+GMDS	5.8	499	5.3	6.9
GMDS+SNRPD3	5.9	499	5.4	7
SEC24C+UBA3	5.6	499	4.9	6.8
ERP44+KDM1A	3.2	499	2.8	3.9
GMDS+SGTA	5.8	499	5.6	7.1
SARS+SEC24C	5.7	499	4.8	6.9
CCT4+SPPL3	3.8	499	3.3	4.6
GMDS+SRP54	5.9	499	5.6	7.1
GMDS+STX5	5.7	499	5.5	7
ERP44+SUCO	5.9	499	5.6	7.1
ANAPC2+GMDS	5.9	499	5.4	7
SEC23B+SON	5.6	499	4.9	6.8
SEC23B+TTK	5.8	499	5.2	7.1
COPB1+GMDS	5.8	499	5.2	7
GMDS+PSMD1	5.7	499	5.3	6.9
GMDS+RAB14	5.9	499	5.6	7.1
EIF3H+GMDS	5.8	499	5.4	7
CAMLG+VPS53	5.7	499	4.9	6.8
EIF3L+GMDS	5.8	499	5.5	7
GMDS+RPL4	5.9	499	5.5	7.1
VPS35+VPS53	5.8	499	5.3	7
SEC22B+SRP54	5.5	499	4.8	6.7
COX7C+GMDS	6	498	5.5	7.2
EIF6+GMDS	5.8	498	4.9	6.9
GMDS+TRAPPC5	6.1	498	5.7	7.3
ERP44+RPL35	3.1	498	2.7	3.8
PSMD11+SUCO	3.7	498	3.3	4.8
GMDS+SAMM50	5.9	498	5.4	7.1
GMDS+RRS1	6	498	5.6	7.3
ASNA1+SNRPD3	5.9	498	4.8	7
GMDS+KDM1A	5.9	498	5.5	7.2
GMDS+MRPL54	5.9	498	5.4	7.1
BAG6+GMDS	5.9	498	5.5	7.1
GMDS+RPL7L1	6	498	5.5	7.2
GMDS+PSMA7	6	498	5.5	7.2
GMDS+UBA3	6	498	5.6	7.3
GMDS+SEC24B	6.1	498	5.7	7.3
GMDS+VPS52	6	498	5.6	7.2
SEC22B+SEC23B	5.9	498	5.4	7.1
GMDS+SRPRB	6	498	5.5	7.2
SARS+SEC22B	5.7	498	5	6.9
THOC5+TRAPPC3	5.3	498	4.5	6.5
SCFD1+SEC23B	5.8	498	4.8	6.9
SPCS3+TRAPPC3	5.7	498	4.8	6.9
BAG6+UGP2	4	498	3.6	4.9
GMDS+TMED10	6.1	498	5.8	7.3
GMDS+VPS54	5.9	498	5.6	7.2
GMDS+TTK	5.9	498	5.5	7.2
GMDS+PSMD11	5.9	498	5.5	7.2
GMDS+IFFO1	5.8	498	5.3	7
GMDS+PSMB6	6	498	5.5	7.2
CAMLG+VPS54	5.8	498	5.2	7.1
ARL1+GMDS	5.9	498	5.1	7.1
EIF3H+ERP44	3.3	498	2.9	4.1
SEC24C+WDR43	5.8	498	4.9	7
CAMLG+GMDS	5.9	498	5.6	7.2
MRPL54+SPPL3	3.3	497	2.9	4.1
MRPL54+SEC23IP	3	497	2.7	3.7
GOLIM4+SEC22B	6.2	497	5	7.3
GMDS+TRAPPC8	6.2	497	5.9	7.5
ERP44+VCP	3.4	497	3.1	4.2
GMDS+TMED2	6.2	497	5.8	7.4
SEC23B+SF3A1	6	497	4.9	7.1
COX7C+SPPL3	3.3	497	3	4.2
GMDS+UGP2	6.1	497	5.9	7.4
GMDS+SARS	6.2	497	5.8	7.5
GMDS+MRPL51	6	497	5.5	7.3
GMDS+UTP20	6.2	497	5.8	7.5
GMDS+SEC24A	6.2	497	5.9	7.5
GMDS+PSMD2	6	497	5.2	7.2
GMDS+SEC23IP	6.3	497	6.1	7.7
AP2A1+GMDS	6	497	5.3	7.2
ERP44+GMDS	6.3	497	6	7.6
GMDS+TRAPPC11	6.2	497	5.9	7.4
EIF3D+GMDS	6.1	497	5.5	7.4
TRAPPC8+VPS53	5.9	497	5.3	7.2
GMDS+RRM1	6.2	497	5.8	7.6
RPL4+SUCO	4.1	497	3.6	5
GMDS+RTF1	6.1	497	5.7	7.4
RPL7L1+SEC24C	5.2	497	4.6	6.3
ANAPC2+ASNA1	4.5	497	4.1	5.5
TRAPPC3+VPS35	6.1	497	5.5	7.4
CCT4+GMDS	6.1	497	5.6	7.4
RPL7L1+TRAPPC8	4.7	496	4.2	6.1
PSMD11+TRAPPC3	6.3	496	5.2	7.5
GMDS+SF3B2	6.4	496	5.8	7.7
GMDS+TRAPPC3	6.4	496	6	7.6
GMDS+WDR3	6.4	496	5.7	7.7
ERP44+PSMD3	3.4	496	3	4.3
GMDS+NAA25	6.3	496	5.6	7.6
CHAF1A+GMDS	6.4	496	5.8	7.7
RPL7L1+SUCO	3.7	496	3.2	4.7
GMDS+SEC24C	6.3	496	6.1	7.7
GMDS+VPS53	6.3	496	5.7	7.5
GMDS+VPS35	6.4	496	5.8	7.6
SEC24C+VPS54	6.2	496	5.2	7.4
GMDS+SEC23B	6.5	496	6.3	7.9
GMDS+MYBL2	6.2	496	5.6	7.4
GMDS+RPS6	6.3	496	5.7	7.6
ANAPC2+SUCO	3.6	496	3.2	4.4
SEC23B+VCP	6.5	495	5.7	7.8
GMDS+VCP	6.4	495	5.7	7.6
SEC24A+SRP54	2.9	495	2.6	3.7
SEC22B+SPATA5L1	4.7	495	4.1	6
GMDS+SEC22B	6.5	495	6.1	7.9
ASNA1+SAMM50	5.4	495	4.7	6.5
COPS4+SPPL3	3.2	495	2.9	3.9
COPA+SEC23B	4.6	495	4.1	5.9
ERP44+SEC22B	6.5	495	5.4	7.6
GMDS+WDR43	6.7	495	6	8
DCAF13+UGP2	3.8	495	3.3	4.6
GMDS+UBR4	6.6	495	5.6	7.8
SUCO+THOC5	3.4	495	3.1	4.2
PSMA7+TRAPPC3	4.7	495	4.2	5.8
ASNA1+GMDS	6.4	495	5.8	7.7
IFFO1+SEC22B	4.6	495	4.1	5.6
GMDS+SUCO	6.5	495	6.2	7.9
CCT4+ERP44	3	494	2.6	3.7
CCT3+GMDS	6.7	494	5.9	7.9
RRS1+SUCO	4.4	494	3.9	5.7
SEC23IP+TTK	3.4	494	3	4.2
DCAF13+GMDS	6.7	494	5.8	8
PSMC6+SEC22B	4.1	494	3.5	5
ATP5B+GMDS	6.7	494	6	8
SEC23IP+UTP20	3.9	494	3.5	4.7
PPP1R8+SPPL3	3.5	494	3.1	4.3
SEC24A+SEC24C	6.8	494	5.6	8
CAMLG+CCT4	4.5	494	4.1	5.5
UGP2+UTP20	4.3	494	4	5.3
GMDS+SON	6.9	494	5.9	8.1
ASNA1+UBA3	5	493	4.4	6.1
DCAF13+SPPL3	3.8	493	3.3	5
COX7C+ERP44	3.9	493	3.4	4.7
SF3B2+TRAPPC8	3.8	493	3.4	4.7
EIF3H+SUCO	3.6	493	3.2	4.4
SRP54+VPS53	4.8	492	4.3	5.8
PSMD2+TRAPPC8	3.9	492	3.4	4.8
IFFO1+SEC23B	4	492	3.6	4.8
RPL4+TRAPPC8	4.1	492	3.7	5
GMDS+SF3A1	7.3	492	6.2	8.6
SEC24A+VPS54	4.3	492	3.8	5.4
DCTN1+SPPL3	3.8	492	3.4	4.9
RPS6+SEC23IP	3.7	491	3.4	4.6
PPP1R8+TRAPPC5	3.4	491	3.1	4.3
EIF3A+TRAPPC8	3.9	491	3.6	4.8
SRPRB+UGP2	4	491	3.5	5
SEC24B+VPS54	3.8	491	3.1	4.7
ASNA1+PSMD3	4.4	491	4.1	5.4
GMDS+SPCS3	7.5	491	6.4	8.9
SRP54+TRAPPC5	3.2	490	2.9	3.9
SARS+UGP2	3.9	490	3.5	4.8
CAMLG+PPP1R8	4.6	490	4.1	5.6
ASNA1+UBR4	4.8	490	4.3	5.7
SEC24B+VPS52	3.6	490	3.1	4.4
STX5+VPS53	4.3	490	3.8	5.2
COPS4+VPS53	3.7	490	3.3	4.5
ATP5A1+VPS53	3.7	490	3.4	4.9
PSMD1+SUCO	3.5	490	3.1	4.5
STX5+UGP2	4.2	490	3.7	5
IFFO1+SEC24C	4.8	490	4	6.1
ATP5B+SEC23IP	3.7	490	3.3	4.7
PSMC6+TRAPPC8	3.8	489	3.2	4.6
RRM1+SEC23IP	4.1	489	3.5	5.1
KDM1A+SPPL3	3.3	489	3	4.4
SEC23IP+WDR3	3.9	489	3.3	4.7
ERP44+RTF1	3.9	489	3.4	4.7
RRS1+TRAPPC8	4.5	489	4.1	5.5
CAMLG+PSMD2	4.4	488	4	5.4
CCT4+SEC23IP	3	488	2.7	3.9
ERP44+RPS6	4.5	488	3.9	5.5
RPL35+TRAPPC11	3.9	488	3.4	4.8
PSMC1+SUCO	3.6	488	3.2	4.4
CAMLG+RPL7L1	4.8	488	4.3	5.8
CAMLG+CHAF1A	5.8	488	4.8	7
RAB14+VPS53	3.6	487	3.3	4.6
SPPL3+VPS52	4.2	487	3.8	5.2
PRPF39+SEC23IP	2.6	487	2.3	3.3
RRM1+SUCO	3.9	487	3.5	4.8
RPL7L1+SEC22B	4	486	3.6	4.9
ASNA1+ATP5B	4.5	486	4.1	5.5
PSMC6+SUCO	3.2	486	2.8	4.3
PPP1R8+SEC24A	3	486	2.6	3.7
UGP2+VPS52	4.4	486	4.1	5.4
EIF6+TRAPPC8	5.2	486	4.5	6.3
CCT4+SUCO	3.9	486	3.4	4.9
SPATA5L1+TRAPPC3	4.3	486	3.9	5.3
RPL35+VPS53	3.6	486	3.3	4.4
DCAF13+TRAPPC3	4.6	486	4.1	5.6
EIF3D+SPPL3	4.1	485	3.5	5
CAMLG+PSMA7	4.9	485	4.2	6
SEC23B+SMC3	4.2	485	3.7	5.2
RPL35A+TRAPPC3	4.4	485	3.9	5.3
COX7C+SUCO	3.7	485	3.3	4.5
PSMB6+SPPL3	4.4	485	3.9	5.4
NAA25+SEC24C	4.8	485	4.3	5.8
ERP44+SAMM50	3.9	484	3.3	4.8
ERP44+UTP20	4.5	484	3.8	5.4
PSMD11+TRAPPC8	4.2	484	3.9	5.4
SEC22B+SRPRB	4.7	484	4.1	5.8
GOLIM4+ST3GAL4	-3.7	484	-4.5	-3.2
PSMB6+SEC23B	5.2	484	4.6	6.2
PRPF39+VPS53	4.2	484	3.7	5.3
AP2A1+TRAPPC11	5	484	4.3	6.2
ASNA1+TTK	5.1	484	4.7	6.5
CCT4+UGP2	3.9	484	3.5	4.9
NAA25+TRAPPC8	3.7	483	3.4	4.6
SAMM50+TRAPPC3	4.9	483	4.4	6.1
SRPRB+VPS53	4.4	483	4	5.4
SAMM50+SUCO	4.1	483	3.7	5.1
SEC24C+SMC3	4	483	3.6	5
ASNA1+SRP54	4.6	483	4	5.6
SARS+SEC23IP	4.7	483	4.2	5.8
EIF3D+SUCO	3.5	483	3	4.4
GET4+VPS53	4	483	3.6	5
SEC24B+SPCS3	4	483	3.6	4.9
ANAPC2+SPCS3	3.7	483	3.3	4.5
TRAPPC8+VPS54	4.6	483	4.1	5.6
KDM1A+VPS53	3.5	483	3	4.3
SEC22B+TTK	4.9	483	4.4	5.9
CAMLG+SEC24B	4.9	483	4.3	5.9
HNRNPK+TRAPPC8	3.3	482	3	4.4
EIF3A+TRAPPC3	4.8	482	4.3	6
ST3GAL4+TRAPPC3	3.8	482	3.5	4.7
AKAP9+SUCO	2.6	482	2.2	3.2
BAG6+TRAPPC11	3.9	482	3.5	4.8
ASNA1+RAB14	4.8	482	4.3	5.9
ASNA1+CCNA2	4.4	482	3.6	5.6
COPA+SUCO	3.8	481	3.4	4.7
TMED2+TRAPPC11	4	481	3.6	5
CCNA2+VPS53	3.3	481	2.9	4
SGTA+UGP2	3.9	481	3.4	4.7
SUCO+WDR43	4	481	3.3	4.8
ASNA1+VPS54	5.8	481	5.1	7
RRM1+UGP2	4.9	480	3.9	6.1
ASNA1+PSMC6	4	480	3.6	5.1
CCT3+TRAPPC3	4.2	480	3.7	5.2
TRAPPC3+TTK	4.6	480	4.1	5.5
AP2A1+VPS53	4	480	3.4	4.9
ERP44+SRPRB	3.9	480	3.4	4.7
CAMLG+UBR4	4.6	480	4.2	5.6
ERP44+PSMD11	3.5	480	3.1	4.4
SPATA5L1+SUCO	3.5	480	3.1	4.5
COX7C+VPS53	4.4	480	3.8	5.3
CAMLG+SCFD1	5.1	480	4.4	6.5
SPCS3+TRAPPC5	4.2	480	3.8	5.1
TRAPPC5+VPS35	3.5	480	3.2	4.7
NAA25+TRAPPC3	4.7	479	4.1	5.7
PSMC1+SEC22B	4.4	479	3.8	5.3
RAB14+SEC22B	4.2	479	3.8	5.4
EIF6+SEC23B	5.1	479	4.5	6.5
ARL1+SEC22B	4.3	479	3.9	5.4
MYBL2+SEC24C	4.8	479	4.2	5.7
SPPL3+STX5	3.8	479	3.3	4.6
PSMC6+TRAPPC3	4.3	478	3.7	5.6
MYBL2+TRAPPC3	4.6	478	4.1	5.6
IFFO1+TRAPPC3	4.4	478	4	5.3
THOC5+VPS53	3.5	478	2.9	4.2
TMED10+VPS53	3.4	478	3.1	4.3
TRAPPC11+TRAPPC5	4.4	478	3.9	5.4
SEC23IP+SPATA5L1	3.5	478	3	4.4
COPA+SEC22B	4.4	478	3.8	5.5
TRAPPC11+VPS52	4.3	478	3.9	5.3
PSMA7+SEC23IP	3.4	477	3	4.2
SRPRB+TRAPPC8	4.6	477	4.1	5.6
SEC24C+UBR4	5.1	477	4.7	6.1
PSMD1+SEC22B	4.6	477	4.1	5.6
SPCS3+VPS54	4.2	477	3.8	5.2
SNRPD3+TRAPPC8	4.8	477	4.2	5.8
EIF3H+SEC23IP	3.6	477	3.1	4.7
GET4+SEC24A	2.7	477	2.4	3.4
ASNA1+SMC3	3.9	476	3.4	5.1
SON+SUCO	3.2	476	2.7	3.9
RPS6+SEC24C	4.9	476	4.4	6
ASNA1+PSMD1	4.8	476	4.3	5.9
RRM1+TRAPPC3	5	475	4.5	6.1
TRAPPC3+WDR43	5	475	4.4	6
SEC22B+STX5	5.8	475	4.8	6.9
SUCO+UTP20	4.2	475	3.8	5.1
SEC24C+SF3A1	5	475	4.6	6.2
ANAPC2+ERP44	3.4	475	3	4.2
SEC23IP+SF3B2	3.5	475	3.2	4.6
PSMD11+UGP2	3.9	475	3.3	5.1
SEC22B+SNRPD3	4.8	474	4.3	5.9
CAMLG+UTP20	4.5	474	4	5.6
CCT4+TRAPPC3	5	474	4.5	6.3
RPS6+SEC23B	5.8	474	4.7	6.9
CCT4+SEC22B	5.2	474	4.6	6.3
CAMLG+EIF3L	4.9	474	4.5	6
SEC22B+VPS35	5.2	473	4.2	6.3
SEC22B+WDR43	5	473	4.3	6.2
ERP44+RPL4	4.1	473	3.6	5
TRAPPC8+VCP	5.3	473	4.6	6.5
PSMD11+TRAPPC11	3.8	473	3.4	4.7
EIF3D+VPS53	3.6	473	3.1	4.4
ASNA1+RTF1	5.2	473	4.4	6.3
SEC22B+TRAPPC11	5.4	473	4.8	6.6
VPS52+VPS53	4	472	3.6	4.9
EIF3D+TRAPPC3	5.3	472	4.7	6.5
ERP44+SPATA5L1	2.8	472	2.5	3.5
ASNA1+CCT4	5.5	472	4.5	6.7
ASNA1+WDR3	5.4	472	4.5	6.6
SUCO+VPS35	4.3	471	3.6	5.5
GET4+UGP2	3.5	471	3.2	4.3
CHAF1A+TRAPPC3	5.6	471	4.7	6.7
CAMLG+SEC22B	5.6	471	4.5	6.7
SPATA5L1+VPS53	4.4	471	3.8	5.4
SEC22B+VPS54	6	470	5.2	7.3
PSMD3+TRAPPC3	4.7	470	4.2	5.6
HNRNPK+SUCO	3.1	470	2.6	3.8
ASNA1+SEC22B	5.8	470	5	7.1
SNRPD3+SUCO	3.5	470	3	4.4
ANAPC2+SEC23IP	2.7	470	2.4	3.4
RTF1+SEC23IP	3.4	469	3.1	4.3
SPPL3+SRPRB	3.3	469	3	4.1
SRPRB+TRAPPC11	4.3	469	3.8	5.4
SEC24A+SPCS3	4.4	469	4	5.3
COX7C+TRAPPC11	4.3	469	3.7	5.1
TRAPPC8+UTP20	4.4	469	4.1	5.5
ERP44+TUBB	3.2	469	2.9	4
RTF1+SPPL3	4.1	468	3.5	5.1
COPA+SEC23IP	3.4	468	2.9	4.1
MRPL54+TRAPPC11	4.5	468	3.9	5.6
TUBB+VPS53	4	468	3.5	4.9
ERP44+PSMA7	3.1	468	2.8	4.1
SCFD1+SEC24A	4.2	468	3.6	5
SEC24A+VPS52	3.7	468	3.4	4.5
ERP44+THOC5	3.1	468	2.8	3.9
BAG6+SPCS3	4	468	3.5	4.9
RPL35A+VPS53	4.4	467	3.7	5.5
AP2A1+CAMLG	4.5	467	4	5.5
CAMLG+EIF3A	5.4	467	4.8	6.5
TRAPPC11+VPS54	4.9	467	4.4	6.2
MYBL2+TRAPPC8	4.8	466	4.3	5.9
SGTA+TRAPPC5	2.7	466	2.4	3.4
PTPN1+TRAPPC8	3.3	466	3	4.1
SNRPD3+TRAPPC3	4.7	466	4.1	5.7
TMED2+VPS53	3.6	466	3.1	4.5
GET4+SPCS3	3.6	466	3.3	4.4
IFFO1+VPS53	4.4	466	3.7	5.4
SF3A1+UGP2	4.5	466	4	5.8
SCFD1+SPPL3	4.7	466	4.4	6.1
EIF6+TRAPPC3	4	466	3.5	4.8
TRAPPC11+TUBB	3.6	466	3.1	4.5
COG4+TRAPPC8	3.3	466	2.9	4.2
SARS+TRAPPC11	4	466	3.6	5
ASNA1+SF3A1	5.2	465	4.6	6.3
PSMD3+UGP2	4.2	465	3.7	5.3
ASNA1+RPS6	4.8	465	4.4	6.1
TRAPPC5+WRB	3.8	465	3.2	4.6
MYBL2+VPS53	5	465	4	6.1
RRM1+SEC24C	5.1	465	4.6	6.2
MYBL2+SEC23IP	4.6	464	3.9	5.6
EIF3D+TRAPPC8	3.7	464	3.3	4.5
SUCO+UBA3	4.3	463	3.8	5.6
AP2A1+ASNA1	4.4	463	4	5.5
SF3A1+TRAPPC3	5.3	463	4.7	6.4
BAG6+SEC24B	3.1	463	2.8	4.2
RPL4+UGP2	4.1	463	3.6	5.1
TMED10+TRAPPC5	2.9	462	2.5	3.7
CAMLG+THOC5	4.5	462	4	5.4
SRPRB+TRAPPC5	3.8	462	3.2	4.8
AKAP9+SEC22B	4.7	462	4.1	5.8
CAMLG+RPL35	5	462	4.3	6
SEC23IP+THOC5	3.1	462	2.8	3.8
PSMD1+VPS53	3.5	461	2.9	4.3
PSMD3+TRAPPC8	5.1	461	4.3	6.1
RTF1+SUCO	3.9	461	3.5	4.8
PTPN1+TRAPPC3	4.1	461	3.7	5.1
SEC22B+SGTA	4.3	461	3.9	5.2
ERP44+TTK	3.5	461	2.8	4.4
ASNA1+COG3	4.3	461	3.8	5.3
UBA3+UGP2	3.9	460	3.4	4.9
SPPL3+TUBB	2.9	460	2.6	3.7
CAMLG+WRB	5.3	460	4.6	6.4
PSMC1+VPS53	3.7	460	3.2	4.5
ASNA1+TMED2	4	459	3.6	4.9
ERP44+RPL7L1	3.7	459	3.2	4.6
ERP44+MYBL2	3.7	459	3.1	4.5
ERP44+PRPF39	2.6	459	2.2	3.3
ERP44+RRS1	4.3	459	3.6	5.2
RRS1+SEC23B	5	459	4.6	6.1
PPP1R8+VPS53	4.5	459	4	5.6
ASNA1+RPL4	5.1	458	4	6.3
MRPL51+TRAPPC11	4.3	458	3.7	5.2
RPL4+SPPL3	3.5	458	3.1	4.4
ATP5A1+SEC24A	2.7	458	2.4	3.5
PSMA7+SPPL3	3.9	458	3.3	5
RTF1+TRAPPC3	4.5	458	4.1	5.6
UGP2+VPS35	4.4	458	3.8	5.2
SEC23IP+VCP	3.9	458	3.4	4.9
PSMD3+SUCO	4.2	458	3.4	5.2
RPL35A+SPPL3	3.7	457	3.3	4.7
STX5+TRAPPC5	3.3	457	3	4.1
CCT4+TRAPPC8	3.6	457	3.3	4.6
SEC24A+VCP	3.3	457	2.8	4.2
CAMLG+SPATA5L1	4.8	457	4.2	5.8
CAMLG+SARS	6.4	457	5.3	7.5
SPPL3+WDR43	3.3	457	2.8	4.3
CAMLG+RPL35A	4.9	456	4.4	6
CAMLG+PTPN1	4.6	456	4	5.9
AP1M1+MGAT5	-3.9	456	-4.9	-3.6
ASNA1+CHAF1A	4.6	456	3.9	5.5
CCT3+ERP44	3.9	456	3.2	4.8
AP2A1+SEC22B	5.2	456	4.5	6.3
CHAF1A+SUCO	4.1	456	3.6	5.1
COG3+SEC24C	4.5	455	4.1	5.5
ASNA1+RAD21	3.6	455	3.1	4.4
SEC24A+SGTA	2.4	455	2.1	3
DCTN1+VPS53	4.4	455	4	5.6
RPL7L1+VPS53	4.4	455	3.8	5.7
PPP1R8+SPCS3	3.8	454	3.4	4.8
PRPF39+TRAPPC11	3.3	454	3	4.2
PSMB6+SEC22B	4.1	454	3.6	5
CAMLG+SGTA	3.4	454	2.9	4.1
SEC23B+UBA3	4.7	454	4.3	5.8
CAMLG+KDM1A	4	454	3.5	4.8
VPS53+WDR3	3.9	453	3.3	4.8
HNRNPK+SEC22B	4	453	3.6	5
SPPL3+UTP20	4	453	3.5	5
UGP2+VPS54	5	453	4.4	6
COG4+TRAPPC3	3.8	453	3.2	4.6
ASNA1+COG4	3.9	453	3.5	4.9
PPP1R8+VPS52	3.2	453	2.7	4
SEC22B+SON	4.1	452	3.6	5.1
DCTN1+TRAPPC11	4.2	452	3.7	5.1
SUCO+TTK	4.3	452	3.6	5.3
SPPL3+WDR3	4.1	452	3.5	5.2
RTF1+UGP2	4.7	451	4.1	5.7
CAMLG+WDR43	4.5	451	4	5.6
RPL7L1+TRAPPC11	4.2	451	3.7	5.2
SPCS3+STX5	4.2	451	3.7	5.1
SEC23B+WDR11	4.3	451	3.7	5.3
ANAPC2+CAMLG	4.4	451	3.8	5.3
SPPL3+TMED10	2.7	451	2.3	3.4
UGP2+VCP	3.6	451	3.2	4.7
SAMM50+SEC22B	5.2	451	4.7	6.3
SPPL3+TTK	4	451	3.4	4.9
SPCS3+VPS53	4.3	450	3.8	5.4
HNRNPK+SEC23IP	2.5	450	2.2	3.1
EIF3A+VPS53	4	450	3.6	4.8
DCTN1+UGP2	4.6	450	4.1	5.6
RPL4+SEC23IP	3.3	450	2.9	4.1
DCAF13+VPS53	4.1	450	3.7	5
SCFD1+TRAPPC11	4.4	450	3.9	5.5
CAMLG+RRS1	5.1	450	4.5	6.1
EIF3L+TRAPPC11	3.7	450	3.4	4.6
ERP44+WDR3	3.3	449	2.9	4.3
DCAF13+ERP44	4.3	449	3.5	5.5
PSMD2+SEC22B	4.6	449	4	5.8
ASNA1+SON	5.3	449	4.6	6.4
CAMLG+WDR3	4.5	449	4.1	5.5
PSMA7+VPS53	4.7	449	4	5.8
MRPL54+UGP2	3.3	448	3	4.1
RRM1+TRAPPC8	4.7	448	4.2	5.9
ASNA1+RRM1	4.9	448	4.5	6.1
ERP44+PSMD2	2.8	448	2.4	3.4
CCNA2+TRAPPC3	3.8	448	3.3	4.6
ATP5A1+TRAPPC11	4.3	448	3.5	5.5
ASNA1+WDR11	4.7	448	4.1	5.9
RPS6+SEC22B	4.8	448	4.3	5.9
ERP44+SF3B2	4.3	448	3.6	5.4
MYBL2+UGP2	4.8	448	4.2	5.8
PSMB6+TRAPPC8	4.6	448	4.1	5.8
PPP1R8+UGP2	3.1	448	2.8	4
SEC22B+WDR3	4.7	448	4	5.8
SCFD1+SEC22B	6	448	4.9	7.2
PSMD3+SEC24A	2.4	448	2.1	3
SCFD1+SPCS3	4.8	447	4.3	6
UBR4+VPS53	4.9	447	3.8	6
DCAF13+SEC22B	5	447	4.2	6.1
CHAF1A+SEC22B	5.1	447	4.6	6.3
ASNA1+RPL35A	4.7	447	4.3	5.8
MRPL54+TRAPPC5	4.6	447	3.8	5.6
SPPL3+TMED2	2.8	446	2.4	3.5
ST3GAL4+VPS53	2.7	446	2.4	3.4
ASNA1+COPA	5	446	4.4	6.2
ATP5A1+SPPL3	2.7	446	2.3	3.3
COG4+SEC22B	4.7	446	3.6	5.8
CCNA2+SEC22B	4.8	445	4.1	5.8
EIF3D+SEC22B	4.8	445	4.3	6
CAMLG+CCNA2	3.6	445	3.1	4.4
COX7C+TRAPPC5	3.2	445	2.7	4
RPL4+SEC22B	5.2	445	4.3	6.5
CHAF1A+VPS53	5.3	445	4.4	6.5
RRS1+SPPL3	3.8	445	3.3	4.7
SF3B2+SPPL3	3.4	444	2.9	4.1
EIF3H+TRAPPC11	3.8	444	3.4	4.7
ATP5A1+TRAPPC5	2.8	444	2.4	3.7
DCAF13+TRAPPC5	5.5	444	4.4	6.7
ANAPC2+SEC22B	5.6	443	4.8	6.8
ANAPC2+TRAPPC8	5.7	443	4.6	7
SAMM50+VPS53	4.1	443	3.8	5.2
SF3B2+SUCO	4	443	3.5	5
EIF3A+UGP2	4.1	443	3.6	5.4
SGTA+VPS53	3.6	443	3.3	4.4
SPPL3+VCP	5.3	443	4.7	6.4
TRAPPC3+WDR11	3.4	443	2.9	4.3
PSMD11+TRAPPC5	4	442	3.6	5
SF3B2+VPS53	5.9	442	4.8	7.2
RRS1+UGP2	4.1	442	3.7	5.3
AP2A1+SPPL3	4.4	442	3.7	5.7
GMDS+WDR11	6	442	5	7.2
RPS6+SUCO	4.8	441	4.2	5.8
ATP5A1+VPS54	3.3	441	2.9	4.1
PSMD1+SEC23IP	3.1	440	2.5	3.8
RPL7L1+SPPL3	3.3	440	2.8	4.1
ERP44+PSMC1	2.9	440	2.5	3.6
STX5+VPS52	3.4	440	3	4.3
SF3A1+SUCO	3.9	440	3.5	4.8
UBA3+VPS53	4.6	440	4	5.8
ERP44+RRM1	3.2	439	2.9	4.1
VPS53+VPS54	4.2	439	3.7	5.1
SPCS3+TRAPPC11	4.8	438	4.3	6
SEC24B+SRPRB	3.1	438	2.7	3.9
RRS1+SEC23IP	3.6	438	3.2	4.5
RPL7L1+SEC23IP	3	438	2.6	3.8
COPA+ERP44	3.3	438	2.9	4
RAB14+SPCS3	3.8	437	3.4	4.7
CCNA2+SEC23B	3.8	437	3.4	4.6
SMC3+TRAPPC3	3.4	437	3	4.5
TRAPPC8+WDR11	3.5	437	3	4.5
CCT4+VPS53	4.2	436	3.5	5.2
SPPL3+VPS35	3.9	436	3.4	5.1
SPCS3+UBR4	3.8	436	3.4	4.7
SCFD1+SEC24B	5.6	435	4.5	6.7
EIF3L+SPPL3	2.7	435	2.3	3.3
PSMB6+SUCO	4.4	435	4	5.5
RAB14+TRAPPC5	3.3	435	2.9	4
ATP5B+UGP2	4.1	435	3.7	5.1
BAG6+TRAPPC5	3.3	435	2.9	4.1
NAA25+VPS53	4.2	435	3.6	5.1
SPCS3+SRP54	3.4	435	2.9	4.2
SF3A1+SPPL3	3.6	435	3.1	4.8
UGP2+WDR3	4.2	434	3.7	5.1
ASNA1+SCFD1	5.8	433	4.8	7
SAMM50+SEC23IP	4.4	433	4	5.5
CAMLG+PSMC1	4.4	433	4	5.7
HNRNPK+VPS53	3.3	433	2.9	4.1
CAMLG+SF3A1	4.4	433	3.7	5.6
SEC23IP+UBA3	3.4	432	3	4.2
SAMM50+SPPL3	4.1	432	3.6	5
ARL1+ASNA1	4.5	432	3.9	5.4
KDM1A+TRAPPC11	3.6	431	3.1	4.4
EIF3L+TRAPPC5	2.6	431	2.3	3.3
MRPL51+VPS53	5.2	431	4.2	6.4
IFFO1+SUCO	3.5	431	3.1	4.3
GET4+TRAPPC5	3.2	431	2.8	4
SPPL3+UBA3	5.2	430	3.9	6.4
SPCS3+VPS52	3.9	430	3.5	5.2
TRAPPC3+VCP	4.6	430	4	5.9
CAMLG+PSMD3	4.9	429	4.3	6.3
EIF3D+SEC23IP	3.8	429	3.2	4.7
CAMLG+GOLIM4	4.2	429	3.7	5.1
SEC23IP+SNRPD3	3.4	429	2.9	4.1
RPL35+SPPL3	3.2	429	2.8	4
ASNA1+MYBL2	5.3	429	4.6	6.5
CHAF1A+SEC24A	3.2	428	2.7	4
COPS4+TRAPPC5	3.5	428	3	4.3
CAMLG+RPL4	4.3	428	4	5.6
CAMLG+EIF3D	4.5	428	4	5.5
SEC22B+SMC3	4.5	427	3.8	5.5
CCNA2+SEC23IP	2.9	427	2.5	3.7
SF3A1+TRAPPC5	3.1	427	2.6	3.8
PRPF39+SPPL3	3.5	427	3	4.4
ASNA1+SGTA	3.8	427	3.2	4.7
CCT3+TRAPPC8	5	426	4.3	6.3
SPATA5L1+TRAPPC11	3.9	426	3.3	4.7
ERP44+WDR43	3.7	426	3.2	4.5
RTF1+VPS53	4.3	426	3.8	5.4
SEC23IP+WDR43	3.2	426	2.9	4.2
TMED2+TRAPPC5	2.9	425	2.5	3.7
SEC24A+SRPRB	2.8	424	2.5	3.6
RPL35A+UGP2	4.5	424	3.9	5.4
MRPL54+SPCS3	3.7	424	3.2	4.5
SEC24A+UBR4	4	424	3.5	4.9
ERP44+PSMB6	4.4	423	3.7	5.5
CAMLG+RTF1	4.4	423	4.1	5.4
ATP5A1+SCFD1	3.4	422	3	4.2
SF3B2+TRAPPC3	4.2	422	3.6	5.2
CAMLG+SAMM50	5.7	422	4.8	6.9
RRM1+SEC22B	4.4	422	3.9	5.5
CAMLG+SNRPD3	4.6	422	4.1	5.6
PSMD2+SEC23IP	3.8	421	2.6	4.6
ANAPC2+UGP2	4.6	421	3.3	5.5
COPS4+SPCS3	3.8	421	3.2	4.6
PSMA7+SEC22B	4.5	421	4	5.7
EIF3D+ERP44	3.4	421	3	4.3
RTF1+SEC24A	4.3	421	3.7	5.4
RPL35+UGP2	3.3	420	3	4.1
TRAPPC11+UBR4	4.3	420	3.8	5.4
EIF3H+SPPL3	3.4	420	2.9	4.2
MYBL2+SEC22B	4.8	420	4.4	6
ASNA1+CCT3	4.8	419	3.9	5.9
CAMLG+PSMD11	4.7	419	4.2	5.8
ERP44+SF3A1	3	419	2.6	3.7
SF3B2+UGP2	4.2	419	3.7	5.1
SEC22B+SF3B2	5	419	4.4	6.2
ANAPC2+TRAPPC11	5.4	419	4.4	6.6
COX7C+UGP2	3.5	418	2.9	4.3
SPCS3+SRPRB	4.4	418	3.6	5.6
UGP2+WDR43	3.8	417	3.1	4.7
EIF3H+UGP2	3.8	417	3.1	4.5
RAD21+SEC22B	3.2	417	2.8	4.1
SPCS3+WRB	3.4	417	3	4.3
DCAF13+TRAPPC11	3.9	417	3.3	4.8
SEC24A+WRB	2.6	417	2.2	3.3
SEC24B+UBR4	3.2	417	2.9	4.1
CHAF1A+SPCS3	6.5	417	5.3	7.8
SAMM50+TRAPPC5	3.2	417	2.8	4.4
PSMD11+SEC22B	5.2	417	4.5	6.5
SARS+TRAPPC5	4.3	416	3.6	5.5
PSMD1+SPPL3	4.1	416	3.6	5
SEC24A+SF3B2	3.6	415	2.8	4.4
SAMM50+UGP2	4.6	415	4.1	5.7
RPL35+SPCS3	3.3	415	2.9	4.1
PSMC1+SPCS3	3.8	415	3.2	4.9
EIF3L+SEC23IP	2.3	415	2	2.9
PSMD3+VPS53	4.4	415	3.6	5.3
CAMLG+MYBL2	5	415	4.4	6.1
RPL7L1+UGP2	3.9	414	3.4	4.9
NAA25+SUCO	3.9	414	2.9	4.8
TUBB+UGP2	3.3	414	2.9	4.1
RAD21+SEC24C	2.9	413	2.6	3.6
EIF3L+SPCS3	3.7	413	3.2	4.6
KDM1A+UGP2	3.5	413	3	4.3
ATP5B+SEC22B	3.9	413	3.6	5
CAMLG+STX5	3.6	413	3.3	4.5
COPA+SPPL3	4.1	413	3.5	4.9
TRAPPC5+VPS54	4.4	413	3.9	5.4
ASNA1+EIF3D	4.8	412	4.2	6
SEC22B+UBR4	4.5	412	4.1	5.6
SEC24B+SRP54	2.2	412	1.9	2.8
COPB1+UGP2	4.1	412	3.6	5.2
TRAPPC5+UBR4	3.6	411	3.1	4.5
CAMLG+TTK	5.2	411	4.5	6.4
SPATA5L1+UGP2	4	411	3.4	4.9
PSMC1+TRAPPC5	2.8	410	2.4	3.6
CHAF1A+SPPL3	4.1	410	3.5	5
ANAPC2+VPS53	4.3	409	3.8	5.4
PSMB6+SEC23IP	3.7	409	3.2	4.5
KDM1A+SPCS3	3.8	409	3.3	4.7
COPA+VPS53	3.5	408	3.2	4.5
PSMD2+TRAPPC5	3	408	2.6	3.8
DCTN1+SEC24A	4.6	408	4.1	5.6
COPS4+UGP2	3.2	408	2.8	4
PSMD11+SPPL3	3.4	408	3	4.2
CAMLG+EIF6	4.4	408	3.9	5.4
PPP1R8+SEC24B	2.7	408	2.4	3.7
CAMLG+VPS52	4.8	408	4.4	6
EIF3A+SUCO	3.5	407	3	4.6
ATP5A1+UGP2	3.7	407	3.2	4.6
GOLIM4+VPS53	3.5	407	3.1	4.3
MGAT5+SEC24C	2.7	406	2.2	3.4
RPL7L1+SPCS3	4	406	3.5	4.9
RRM1+SPPL3	4.1	406	3.6	5.2
SNRPD3+VPS53	4.2	406	3.5	5.1
ERP44+PSMD1	3.3	405	2.9	4.1
PSMD2+VPS53	3.4	405	3	4.5
AP1M1+ASNA1	3.7	405	3.1	4.6
SEC24A+TTK	2.7	404	2.3	3.4
NAA25+UGP2	3.3	404	2.9	4.4
TRAPPC5+VPS52	3.8	404	3.4	4.8
RPL35+TRAPPC5	2.7	403	2.4	3.4
CHAF1A+ERP44	3.8	403	3.3	4.7
CHAF1A+UGP2	4	403	3.4	5.2
NAA25+SEC22B	4.8	402	4.3	6.1
CAMLG+PSMD1	5.1	402	4.5	6.2
SNRPD3+TRAPPC11	4	402	3.4	5
PSMD2+UGP2	3	402	2.6	3.8
TRAPPC11+VPS35	5.4	402	4.3	6.5
PSMD11+VPS53	4.5	401	3.9	5.5
SRPRB+VPS54	4.3	401	3.7	5.6
IFFO1+TRAPPC11	4.2	401	3.6	5.2
MRPL54+SEC24A	4.4	401	3.8	5.7
NAA25+SEC23IP	2.9	401	2.5	3.6
MRPL51+UGP2	4.2	401	3.6	5.2
TRAPPC3+UTP20	5.4	400	4.8	6.7
RRS1+VPS53	4.3	400	3.8	5.7
TTK+UGP2	4.3	400	3.7	5.2
AKAP9+CAMLG	4.4	400	4	5.4
AP2A1+SPCS3	4	399	3.3	5.2
RRS1+SEC22B	5	399	4.4	6.3
MRPL54+VPS54	4	399	3.3	4.8
STX5+VPS54	3.5	399	3	4.3
VPS53+WDR43	4.6	398	4.1	5.7
AP2A1+SEC24A	2.6	398	2.3	3.3
RRS1+TRAPPC11	4	397	3.5	5
SGTA+SPCS3	3.6	397	3.2	4.4
SPPL3+THOC5	4.1	397	3.3	5.3
SRPRB+VPS52	3.4	396	2.9	4.5
SF3B2+TRAPPC11	3.7	396	3.2	4.8
EIF3L+UGP2	3.5	396	3.1	4.3
CAMLG+TMED10	3.8	396	3.5	4.7
SPCS3+UBA3	3.7	396	3.3	4.9
MYBL2+SPPL3	4.2	396	3.6	5.4
PRPF39+SPCS3	3.1	395	2.8	4.1
SPCS3+UTP20	4.4	395	3.7	5.6
EIF3A+SPPL3	4.1	394	3.3	5.2
CAMLG+RAB14	4.4	394	4	5.4
SCFD1+SRP54	3.9	394	3.5	4.9
MRPL51+SPCS3	3.5	394	3	4.7
PSMD1+TRAPPC11	3.4	393	2.8	4.3
SPATA5L1+SPCS3	3.4	393	3	4.3
TUBB+VPS54	4.4	393	3.6	5.6
SARS+SEC24A	2.9	393	2.4	3.6
SRP54+VPS54	4	392	3.3	5.2
EIF3A+ERP44	2.8	392	2.5	3.7
RTF1+SEC22B	4.6	392	4	5.9
SEC22B+UBA3	4.8	391	4.3	6.2
BAG6+SCFD1	3.9	391	3.4	5.1
AKAP9+VPS53	3.3	390	3	4.5
COPB1+SEC24C	5.1	390	4.5	6.5
AP1M1+ST3GAL4	-4.3	390	-5.3	-3.8
SF3B2+TRAPPC5	3.4	390	3	4.4
RAB14+VPS52	3.3	390	2.8	4.1
MGAT5+SEC22B	3.6	389	3	4.4
CHAF1A+TRAPPC5	3.2	389	2.8	4.2
VPS54+WRB	5.3	389	4.2	6.4
GOLIM4+UGP2	3.2	388	2.8	3.9
PSMA7+TRAPPC11	4	388	3.6	5.3
PSMC1+TRAPPC11	3.7	388	3.1	4.6
SNRPD3+SPPL3	3.4	388	2.9	4.2
SCFD1+TMED10	4.1	388	3.6	5.1
PSMD2+TRAPPC11	3.6	388	2.9	4.7
SEC23IP+SON	3.2	387	2.6	3.9
SEC22B+UTP20	5.9	387	4.7	7.3
SEC22B+SF3A1	5.6	387	4.9	7
RPS6+UGP2	4.9	387	4.3	6.1
EIF3L+MGAT5	-3.2	387	-4	-2.9
SON+UGP2	3.2	387	2.8	4
MRPL51+TRAPPC5	4.4	386	3.1	5.4
CAMLG+COPA	5.9	385	4.8	7.1
VPS52+WRB	3.4	385	2.9	4.3
EIF6+SEC22B	4.4	385	3.9	5.5
RPL7L1+TRAPPC5	2.8	384	2.4	3.7
EIF3A+SEC23IP	3.3	384	2.8	4.3
PRPF39+VPS54	3.7	384	3.1	5
CHAF1A+TRAPPC11	3.9	384	3.3	5
SEC24B+STX5	3.2	384	2.8	4
STX5+UBR4	3.6	383	3.2	4.5
RPL4+VPS53	4.3	383	3.4	5.4
COX7C+SPCS3	3.7	383	3.2	4.8
TRAPPC5+TUBB	2.7	383	2.3	3.4
SMC3+SUCO	3	382	2.5	3.8
ERP44+IFFO1	3.7	381	3	4.5
RAD21+ST3GAL4	-3.9	381	-4.9	-3.4
SARS+SPCS3	3.6	381	3.2	4.6
SARS+VPS54	3.8	381	3.4	4.9
SON+VPS53	4.8	379	3.8	5.9
COG3+TRAPPC8	4	379	3.6	5.1
PPP1R8+VPS54	4.2	379	3.6	5.3
MRPL51+SEC24A	2.4	378	2	3
CAMLG+RPS6	4.6	378	4.2	5.7
PTPN1+SUCO	3	378	2.5	3.7
GOLIM4+SUCO	2.2	378	1.9	2.8
RPS6+VPS53	4.5	378	3.9	5.8
CCNA2+ERP44	2.6	377	2.3	3.4
COG4+VPS53	3.5	377	2.9	4.3
RAB14+SCFD1	4.1	377	3.4	5
RPL35A+SEC22B	4.7	377	4.1	5.9
SRP54+VPS52	2.9	376	2.4	3.6
GOLIM4+TRAPPC11	3.1	376	2.8	3.9
DCTN1+TRAPPC5	3.8	376	3.4	4.8
CAMLG+HNRNPK	4.3	376	3.9	5.2
COPB1+SEC23B	5	376	4.1	6.4
AP2A1+TRAPPC5	2.8	375	2.4	3.7
VCP+VPS53	3.6	375	3.1	4.6
CAMLG+SRP54	4.1	375	3.8	5.2
CCT3+UGP2	4.1	375	3.5	5.1
KDM1A+TRAPPC5	3.1	374	2.5	3.8
SPATA5L1+SPPL3	3.1	374	2.8	3.9
CCT3+SEC23IP	3.2	374	2.7	4
SPCS3+TUBB	3.9	374	3.3	5
RTF1+TRAPPC5	3.2	374	2.8	4.1
CCT3+SPPL3	3.9	374	3.4	4.8
SEC22B+VCP	4.6	373	4.1	6
PSMC6+VPS53	3.5	373	3.1	4.6
ERP44+PSMC6	2.9	373	2.5	3.7
TRAPPC11+WDR3	4.1	373	3.6	5.4
VPS35+VPS52	4.7	373	4.2	5.8
RPL35A+SPCS3	3.3	372	2.7	4.2
ATP5B+VPS53	5.2	372	4.3	6.5
PSMD3+SPPL3	3	372	2.6	3.8
COG3+TRAPPC3	4.2	371	3.7	5.3
DCAF13+SEC24A	3.4	371	2.9	4.4
CAMLG+TMED2	3.9	371	3.5	4.8
TRAPPC5+UBA3	4.8	370	3.5	6.1
DCTN1+SPCS3	4	370	3.6	5.2
GOLIM4+SPPL3	2.5	369	2.2	3.2
RPL4+TRAPPC5	3.1	369	2.5	3.8
PRPF39+UGP2	3	369	2.6	3.8
CAMLG+WDR11	3.9	369	3.5	4.8
SCFD1+VPS35	3.3	369	2.8	4.5
ATP5B+CAMLG	4.5	369	3.9	5.7
ERP44+SNRPD3	3.8	368	3.3	4.7
DCAF13+SCFD1	3.9	367	3.3	5.1
PPP1R8+UBR4	2.9	367	2.5	3.8
CAMLG+NAA25	4.6	366	4	5.9
BAG6+VPS52	3	366	2.6	3.9
SCFD1+VPS53	5	366	4.4	6.2
BAG6+UBR4	3	366	2.4	4.1
AP1M1+GOLIM4	-3.8	365	-4.7	-3.2
CAMLG+PSMC6	3.7	365	3.3	4.7
THOC5+TRAPPC11	3.6	365	3.1	4.5
ERP44+SON	3.6	365	3	4.6
COX7C+SEC24A	2.6	365	2.2	3.3
ASNA1+PSMB6	6.1	365	5.2	7.7
SCFD1+TMED2	3.6	365	3.2	4.7
SCFD1+VPS52	3.9	365	3.3	4.9
CAMLG+COG3	4.3	364	3.8	5.6
PRPF39+SCFD1	3.4	364	2.9	4.3
PSMB6+VPS53	4.3	363	3.6	5.5
SMC3+TRAPPC8	3.9	363	3.5	5
ATP5B+SPPL3	3.9	363	3.3	4.8
TTK+VPS53	3.6	363	3.1	4.6
AP1M1+GET4	-3.5	363	-4.3	-3
SPATA5L1+VPS54	3.5	363	2.8	4.4
COPS4+SCFD1	3.7	362	3.2	4.6
SEC24A+UTP20	2.8	361	2.3	3.4
NAA25+TRAPPC11	3.2	361	2.6	4
CAMLG+VCP	4.2	361	3.7	5.3
SMC3+UGP2	3.3	360	2.8	4.3
AKAP9+UGP2	2.9	360	2.5	3.6
DCTN1+VPS52	3.6	360	3.1	4.6
GET4+MGAT5	-3.7	360	-4.8	-3.3
CAMLG+COG4	4.5	360	4	5.5
UBA3+VPS52	2.7	360	2.2	3.5
BAG6+VPS54	3.7	359	3.1	4.7
PSMD1+UGP2	4.1	359	3.5	5.4
RPL35A+TRAPPC11	3.3	358	2.8	4.2
CAMLG+ST3GAL4	4	358	3.6	4.9
PSMA7+UGP2	4.2	358	3.7	5.3
SCFD1+TRAPPC5	4	357	3.4	5.1
ATP5B+TRAPPC5	3.6	356	2.9	4.7
RAB14+UBR4	3	356	2.6	3.7
SEC22B+WDR11	4.2	356	3.7	5.3
PSMD2+SPCS3	3.1	356	2.7	4.1
RRM1+VPS53	4.5	356	3.9	5.7
COG3+VPS53	3.9	355	3.3	5
PSMB6+UGP2	4	354	3.4	4.9
ARL1+TRAPPC8	4.4	354	3.8	5.4
SEC24A+SON	4.4	354	3.6	5.7
ARL1+CAMLG	3.1	354	2.7	3.8
MRPL51+SCFD1	4.3	354	3.4	5.4
PSMA7+VPS54	4.1	354	3.6	5.3
AKAP9+ST3GAL4	-3.3	353	-4.2	-2.9
SAMM50+TRAPPC11	5.2	353	4.2	6.5
EIF3D+TRAPPC11	3.7	352	3.3	4.8
PSMC1+UGP2	3.2	352	2.8	4
VPS52+VPS54	4.2	352	3.3	5.4
CAMLG+CCT3	4.9	352	3.9	6.1
SRP54+UBR4	2.7	352	2.3	3.4
PSMA7+TRAPPC5	4.5	352	3.5	5.7
AP1M1+IFFO1	-3.9	352	-4.8	-3.4
CAMLG+MGAT5	4	352	3.4	4.9
MGAT5+ST3GAL4	-4.4	352	-5.5	-4
RTF1+SEC24B	2.6	351	2.2	3.5
EIF3A+SEC24A	3.3	350	2.9	4.3
HNRNPK+VPS54	3.2	350	2.9	4.3
AKAP9+TRAPPC11	3.3	350	2.9	4.1
CAMLG+SMC3	4	350	3.3	5.2
GOLIM4+MGAT5	-4.1	349	-5	-3.6
CCNA2+TRAPPC11	3.3	349	2.8	4.2
TRAPPC11+WDR43	5	348	3.9	6.2
STX5+TTK	3.5	348	2.7	4.6
COPS4+SEC24A	2.7	348	2.3	3.7
CAMLG+PSMB6	5	348	4.5	6.3
PSMD11+SEC24A	3.5	346	2.9	4.3
AP1M1+CAMLG	3.5	345	3.1	4.4
PSMD1+SPCS3	3.6	345	3	4.6
EIF3A+TRAPPC11	3.2	345	2.8	4.2
PSMA7+SEC24A	2.9	344	2.3	3.6
PTPN1+ST3GAL4	-2.9	344	-3.7	-2.6
EIF3H+VPS53	3.2	344	2.6	4.1
PSMA7+SPCS3	3.8	344	2.9	4.8
TRAPPC11+UTP20	4.1	344	3.6	5.5
AP1M1+SEC22B	3.1	344	2.6	3.8
ARL1+VPS53	4.6	343	3.8	5.7
ARL1+TRAPPC3	5.5	343	4.8	6.9
ARL1+TRAPPC11	3.5	343	3	4.4
RRS1+SEC24A	3.3	343	2.8	4.2
PSMC6+UGP2	3.5	343	2.9	4.4
TRAPPC5+VCP	4.7	343	3.9	6
PSMD11+SPCS3	3.7	343	3.1	4.9
CCT4+SPCS3	2.8	342	2.5	3.8
RPS6+SPPL3	3.8	342	3.2	4.9
AKAP9+SPCS3	2.9	342	2.5	3.7
IFFO1+SPCS3	2.9	342	2.5	3.6
SEC24A+UBA3	2.7	342	2.3	3.4
SEC23IP+SEC23IP	3.4	341	3	4.7
ERP44+ERP44	3.5	341	3.1	4.7
PSMC6+SPPL3	3.7	341	3	4.8
RTF1+TRAPPC11	4.4	341	3.9	5.7
PRPF39+TRAPPC5	2.8	341	2.3	3.6
SCFD1+SRPRB	4.5	341	4	6
SEC23IP+TMED2	2.4	341	2.1	3.1
ERP44+NAA25	3.9	340	3.3	5.1
GOLIM4+SPCS3	3.3	340	2.8	4.2
MYBL2+SEC24A	3.1	340	2.6	3.9
EIF3D+UGP2	4	339	3.4	4.8
CCT4+TRAPPC11	3.7	339	3.2	4.8
TRAPPC11+VCP	4	338	3.5	5.5
ARL1+SUCO	3.4	338	2.7	4.1
SPPL3+SPPL3	4	338	3.5	5.4
SMC3+TRAPPC11	3.3	338	2.8	4.3
RPS6+SEC24A	3.2	338	2.7	4.2
AKAP9+ERP44	2	338	1.8	2.6
EIF6+SUCO	2.7	338	2.3	3.5
TRAPPC11+UBA3	5	338	4	6.3
SEC23IP+SMC3	3.9	337	3.2	5.1
SUCO+SUCO	4.2	337	3.9	5.7
TRAPPC5+WDR3	3.6	337	3.1	4.7
ATP5A1+SPCS3	3.5	337	2.9	4.4
SPCS3+TTK	4.2	336	3.6	5.4
ANAPC2+TRAPPC5	2.4	336	2.1	3.1
SPCS3+VPS35	5.3	336	4.5	6.8
SARS+SCFD1	4.2	336	3.5	5.5
SEC24C+SEC24C	4.6	336	4.2	6.2
DCTN1+SCFD1	4.5	336	4	5.9
PSMD2+SPPL3	2.9	335	2.5	3.9
SEC23B+SEC23B	4.7	335	4.3	6.3
MGAT5+TRAPPC3	3.1	335	2.6	4
VPS53+VPS53	4.6	335	3.8	6
SEC22B+SEC22B	4.9	334	4.5	6.7
TRAPPC5+UTP20	3.6	334	2.9	4.9
SEC24B+VPS35	2.8	334	2.5	3.9
IFFO1+SEC23IP	2.9	334	2.5	3.9
CCT3+SEC22B	5.1	333	4	6.8
CAMLG+CAMLG	5.3	333	4.5	6.9
ASNA1+ASNA1	5.3	333	4.7	7
DCAF13+VPS52	2.9	333	2.5	3.8
TRAPPC3+TRAPPC3	5.2	333	4.6	6.9
SCFD1+STX5	3	332	2.7	4
THOC5+UGP2	3.9	332	3.3	5
MRPL51+VPS54	4.3	331	3.6	5.5
COPB1+SEC23IP	3.7	331	3.3	5
THOC5+TRAPPC5	4.1	331	3.3	5.4
SNRPD3+UGP2	3.8	331	3.2	4.8
UGP2+UGP2	6.2	330	5.7	8.3
MYBL2+SPCS3	3.3	330	2.9	4.3
AKAP9+SPPL3	2.3	330	2	2.9
PSMC6+SEC23IP	2.7	330	2.3	3.5
SPCS3+WDR43	4.1	330	3.1	5.2
ATP5B+SEC24A	3.5	329	2.9	4.4
GMDS+GMDS	6.4	329	5.7	8.4
CHAF1A+SRPRB	4.4	329	3.4	5.8
PSMD3+TRAPPC11	3.3	329	2.4	4.2
SAMM50+SPCS3	3.7	329	3.2	5
TRAPPC8+TRAPPC8	6.4	329	5.2	8.3
SNRPD3+TRAPPC5	3.8	328	3.2	4.7
EIF6+UGP2	3.9	327	3.2	4.9
SPCS3+WDR3	3.9	327	3.4	5.1
EIF3A+SPCS3	3.6	327	3.2	4.7
VPS53+WDR11	3.7	327	3.1	4.8
MGAT5+RAD21	-3.4	326	-4.4	-3
GET4+STX5	2.6	325	2.2	3.3
UBR4+VPS52	3.3	325	3	4.3
SCFD1+SPATA5L1	4.8	325	3.8	6.3
ST3GAL4+UGP2	2.5	325	2.2	3.3
SPATA5L1+TRAPPC5	2.8	324	2.4	3.5
HNRNPK+UGP2	3	323	2.5	4
ANAPC2+SEC24A	2.5	323	2.1	3.2
DCAF13+SEC24B	3	323	2.3	3.7
EIF3H+TRAPPC5	3.1	323	2.6	3.9
CAMLG+SON	4.4	323	4	5.6
AP2A1+SRPRB	4.7	322	3.6	5.9
AP1M1+COG4	-3.8	322	-4.7	-3.3
MRPL54+UBR4	2.5	322	2.2	3.4
CCNA2+SUCO	2.5	322	2.1	3.1
RRM1+SPCS3	3.8	322	3.1	5.1
SRPRB+UBR4	2.4	321	2.1	3.3
PSMD3+SPCS3	3.4	321	2.8	4.3
RPL4+TRAPPC11	4.9	320	4.1	6.2
SON+SPCS3	4.2	320	3.5	5.2
AP1M1+EIF3L	-3.5	320	-4.3	-3.1
CCT4+TRAPPC5	3.7	320	3.1	4.6
SEC24A+WDR3	3	320	2.6	3.9
RPS6+TRAPPC11	4	319	3.4	5.3
KDM1A+SCFD1	4	319	3.3	5.2
MGAT5+SEC23B	2.7	319	2.3	3.4
PTPN1+UGP2	2.7	318	2.4	3.5
PSMB6+SEC24A	2.7	317	2.3	3.5
ATP5B+SPCS3	4.3	317	3.8	5.8
COPB1+SPPL3	4.2	316	3.3	5.5
ATP5B+TRAPPC11	4	316	3.5	5.5
COX7C+SEC24B	2.3	316	2	3
MRPL54+SCFD1	5	315	4.4	6.4
COX7C+SCFD1	3.9	315	3.3	5
PSMC6+TRAPPC5	3.2	314	2.6	4.1
COG4+UGP2	2.6	314	2.2	3.5
MRPL51+VPS52	3	314	2.6	3.9
NAA25+TRAPPC5	3.1	313	2.6	3.8
KDM1A+SEC24A	2.8	313	2.4	3.6
CAMLG+UBA3	4.7	313	4.3	6.1
SCFD1+TUBB	3.2	313	2.8	4.6
CCT3+SUCO	5	313	4	6.6
GET4+VPS52	2.6	313	2.2	3.3
PSMB6+TRAPPC11	4.1	313	3.4	5.5
MGAT5+SGTA	-3.4	312	-4.5	-3.1
SUCO+WDR11	4.2	311	3.5	5.5
PTPN1+SCFD1	3.4	311	2.7	4.4
IFFO1+UGP2	2.7	311	2.3	3.6
TRAPPC5+TTK	3.5	310	2.9	4.6
MYBL2+TRAPPC11	4.3	310	3.7	5.6
COG3+SUCO	3	310	2.6	4.1
SCFD1+THOC5	3.4	310	2.8	4.4
CHAF1A+VPS52	3.1	309	2.6	4.3
PTPN1+TRAPPC11	3.2	309	2.7	4.1
TRAPPC11+TTK	4.2	308	3.5	5.2
PPP1R8+SCFD1	3.4	307	2.8	4.5
PSMA7+VPS52	2.7	307	2.1	3.8
GET4+SEC24B	2.2	307	1.8	2.7
EIF3H+SCFD1	4.5	307	3.7	6.2
RRS1+TRAPPC5	3.3	307	2.7	4.2
SF3A1+VPS53	4.3	306	3.6	5.8
CCNA2+VPS54	4.2	306	3.6	5.5
RTF1+VPS52	3	306	2.5	4.2
SCFD1+VPS54	4.3	306	3.8	5.9
DCAF13+SPCS3	3.6	305	3.1	4.7
RPL4+SEC24A	3.9	305	3.2	5.1
RPL35A+VPS54	4.1	304	3.5	5.5
ST3GAL4+TRAPPC11	3	304	2.6	3.8
COPB1+TRAPPC3	5.4	304	4.4	7.3
IFFO1+VPS54	3.5	304	2.9	4.4
PSMC6+VPS54	3.3	304	2.8	4.5
CCNA2+SPCS3	3	304	2.5	3.8
BAG6+SRPRB	3.1	303	2.6	3.9
CAMLG+RRM1	3.8	303	3.4	5
CCT3+TRAPPC5	3.3	303	2.9	4.4
RAB14+TMED2	2.6	303	2.2	3.3
MYBL2+TRAPPC5	3.5	302	2.8	4.6
SEC24A+SPATA5L1	3.1	302	2.7	3.9
RAB14+VPS54	2.6	302	2.2	3.4
EIF6+VPS53	2.9	301	2.5	3.9
EIF3H+SPCS3	2.8	301	2.5	3.7
AP2A1+SCFD1	4.7	300	3.7	6
SEC24A+THOC5	2.2	300	1.9	2.9
PSMB6+SPCS3	4.2	300	3.6	5.5
RAD21+SEC23B	2.3	300	2	2.9
SF3A1+TRAPPC11	3.9	300	3.4	5.1
AKAP9+TRAPPC5	2.3	299	1.9	3
SGTA+VPS54	2.5	299	2.1	3.3
KDM1A+VPS54	3.4	299	2.9	4.4
RPS6+TRAPPC5	3.3	298	2.7	4.3
PSMC1+VPS54	2.9	298	2.3	3.7
RRM1+TRAPPC11	3.7	297	3.2	4.9
COG3+SEC23B	4.2	297	3.7	5.2
PTPN1+VPS53	2.8	297	2.3	3.7
RAB14+STX5	2.7	296	2.3	3.4
COG4+SUCO	3.2	295	2.6	4
RTF1+SPCS3	3.8	295	3.3	5
COPA+UGP2	4.6	295	3.9	5.7
COPS4+VPS52	2.5	295	2.1	3.3
COPA+TRAPPC11	3.8	294	3.2	5.1
CCT3+TRAPPC11	4.6	294	3.5	6.2
MYBL2+VPS52	3.4	294	2.8	4.2
PPP1R8+SRPRB	2.6	294	2.1	3.5
MGAT5+WDR11	-4.3	294	-5.5	-3.8
PSMA7+SCFD1	3.3	294	2.7	4.4
EIF3D+SEC24A	3.3	293	2.6	4.3
BAG6+STX5	3.3	293	2.7	4.1
NAA25+SPCS3	3.6	293	3.1	4.9
TRAPPC5+TRAPPC5	3.3	293	2.9	4.6
COG3+TRAPPC11	3.6	292	3.2	4.7
SF3A1+SPCS3	3	292	2.5	3.9
MGAT5+PTPN1	-3.1	292	-4.1	-2.7
SAMM50+VPS52	3.5	291	2.9	4.6
CAMLG+RAD21	3.5	291	2.9	4.4
TRAPPC5+WDR43	2.7	290	2.3	3.5
RAD21+TRAPPC3	2.9	290	2.5	3.9
RPL35A+SEC24A	3.1	290	2.7	4.3
SMC3+VPS53	3.5	289	3	4.4
PSMD11+VPS54	3.8	288	3.2	5
COPB1+SUCO	5.2	288	4.1	6.9
PSMD1+TRAPPC5	3	288	2.3	3.8
DCTN1+SRPRB	2.8	288	2.4	3.7
RRM1+SEC24A	2.7	288	2.2	3.4
ERP44+GOLIM4	2	288	1.7	2.6
UTP20+VPS53	5.7	287	4.5	7.3
AKAP9+SEC23IP	2	287	1.8	2.7
COG3+SEC22B	3.7	286	3.1	5.1
TMED2+UBR4	2.5	286	2	3.1
COX7C+VPS54	3	285	2.1	3.8
SCFD1+WRB	4	285	2.7	5
STX5+TMED2	2.7	285	2.2	3.5
SEC24C+TMED2	2.2	285	1.9	2.8
SF3A1+VPS54	3.4	284	2.8	4.7
RRS1+SPCS3	4.3	284	3.6	5.9
ANAPC2+VPS54	4.6	284	3.5	6
PSMC1+SCFD1	2.8	284	2.4	3.6
MGAT5+TRAPPC8	2.2	284	1.9	2.9
EIF3L+ST3GAL4	-3.2	284	-4	-2.6
SARS+UBR4	2.9	283	2.3	3.9
SAMM50+VPS54	5.7	283	4.5	7.6
SNRPD3+SPCS3	4.2	283	3.5	5.6
AP1M1+WRB	-3.2	283	-4	-2.8
MRPL54+VPS52	2.3	282	1.9	2.9
MGAT5+TMED10	-3.3	282	-4	-2.8
RTF1+STX5	3.1	280	2.6	4.2
COPB1+TRAPPC8	4.2	280	3.6	6
ASNA1+COPB1	3.9	280	3.4	5.6
SPCS3+SPCS3	4.2	280	3.8	6
IFFO1+SPPL3	3	280	2.6	3.9
SCFD1+SGTA	2.7	280	2.2	3.5
EIF3A+TRAPPC5	3.4	279	2.8	4.4
EIF6+TRAPPC11	3.4	279	2.9	4.5
SF3B2+VPS54	3.5	279	2.7	4.9
PSMB6+TRAPPC5	3.6	279	2.9	4.9
SON+TRAPPC11	4.1	279	3.1	5.5
CCT4+SEC24A	2.4	279	2	3.1
THOC5+VPS54	3	278	2.6	4
TRAPPC11+TRAPPC11	5	278	4.5	7.2
SF3B2+SRPRB	4.7	278	3.3	5.8
AP1M1+RAD21	-3.1	278	-3.9	-2.6
RPS6+SPCS3	3.7	277	3.3	5.2
RPL35+SCFD1	3.3	277	2.6	4.3
AKAP9+SCFD1	2.8	276	2.3	3.6
PRPF39+UBR4	2.5	276	2.1	3.5
ANAPC2+SCFD1	3.9	276	3.2	5.3
GOLIM4+TRAPPC5	2.2	276	1.9	2.9
VPS52+VPS52	2.8	275	2.2	4
EIF6+SPPL3	3.5	275	2.9	4.5
RPL35+SEC24A	1.9	275	1.7	2.5
NAA25+SPPL3	2.5	275	2.1	3.2
CAMLG+COPB1	4.7	274	3.9	6.5
EIF3D+SPCS3	3.2	274	2.7	4.3
EIF6+SEC23IP	3	274	2.5	3.6
COPB1+ERP44	4.6	274	3.7	6
COX7C+SRPRB	3	274	2.6	3.9
SCFD1+ST3GAL4	2.9	273	2.5	3.8
SF3B2+SPCS3	2.9	273	2.4	3.8
DCTN1+STX5	3.9	272	3.4	5.2
DCTN1+UBR4	3.5	272	2.9	4.9
COG4+MGAT5	-2.8	272	-3.6	-2.4
AP2A1+SEC24B	2.2	272	1.9	3.5
GOLIM4+RAD21	-2.8	271	-3.5	-2.4
ERP44+WDR11	3.8	271	3	4.6
HNRNPK+SPCS3	2.7	271	2.1	3.4
UBR4+VCP	2.5	270	2.2	3.3
SPCS3+TMED2	2.5	270	2.2	3.3
RPL35+UBR4	2.1	269	1.8	2.8
COX7C+VPS52	2.7	269	2.4	3.6
SMC3+SPPL3	2.9	268	2.5	3.8
SAMM50+SEC24A	2.6	266	2.1	3.4
UBR4+WRB	2.8	266	2.3	3.6
CCT3+SPCS3	3.3	266	3	4.5
COPA+SPCS3	3.5	265	3	4.9
ST3GAL4+WDR11	-4.1	265	-5.2	-3.6
KDM1A+SRPRB	2.9	265	2.4	3.8
CCNA2+SCFD1	2.8	264	2.4	3.8
SPCS3+TMED10	2.5	264	1.9	3.1
TMED10+UBR4	2.8	264	2.1	3.8
SRPRB+STX5	2.7	264	2.3	3.4
EIF3H+SEC24A	2.3	263	1.9	3
EIF6+VPS54	2.8	263	2.3	3.7
TMED2+VPS52	2.5	263	2	3.2
SEC24B+WRB	2.1	263	1.7	2.6
RPL4+SPCS3	4.5	263	3.7	6
RTF1+UBR4	2.7	262	2.3	3.7
SAMM50+SEC24B	2.4	262	2	3.3
DCAF13+PPP1R8	4.1	262	3.3	5.4
STX5+WRB	2.6	261	2.2	3.5
DCAF13+SRPRB	2.4	261	2.1	3.3
MYBL2+SCFD1	4.2	261	3.1	5.5
COPS4+SEC24B	1.9	261	1.6	2.5
GOLIM4+SEC23IP	1.8	261	1.6	2.3
PSMD11+SCFD1	3.2	260	2.5	4.2
SPCS3+THOC5	3.4	260	2.9	4.4
EIF3H+SRPRB	3.8	260	2.7	4.7
COG3+UGP2	3.6	260	3.1	4.4
PSMD3+TRAPPC5	3.5	259	2.8	4.3
UBR4+VPS54	3.1	259	2.5	4.2
VPS52+WDR3	2.7	259	2.3	3.7
RRM1+SRP54	2.3	258	1.9	3.1
AP1M1+RAB14	-3.6	258	-4.5	-3.1
COPA+SCFD1	3.5	257	2.6	4.7
EIF3A+VPS52	2.4	257	1.9	3.3
AP1M1+SRP54	-3.4	257	-4.4	-3
SGTA+UBR4	2.1	256	1.8	2.7
MRPL54+SEC24B	2	256	1.7	2.6
RPL35A+TRAPPC5	3.1	256	2.3	4.1
AP1M1+SGTA	-3.3	255	-4.2	-2.8
RRM1+TRAPPC5	3.6	254	3	4.7
SRP54+SRPRB	2.4	254	1.9	3.2
SF3B2+VPS52	3.4	253	2.7	4.7
DCTN1+SRP54	4	253	3.3	4.9
SRPRB+WRB	2.3	253	1.9	3.1
ERP44+PTPN1	2.1	253	1.7	2.7
SON+VPS52	3.3	252	2.6	4.2
COG4+TRAPPC11	3.3	252	2.8	4.2
MYBL2+VPS54	3.6	252	3	4.9
PSMC6+SEC24A	2.6	252	2	3.5
DCTN1+VPS54	3.3	252	2.6	4.6
COG4+SEC23IP	2.1	252	1.7	2.6
RAB14+TMED10	2.1	252	1.7	2.7
COPB1+SPCS3	4.2	252	3.6	6.2
COG3+SEC23IP	3	252	2.5	3.9
EIF3H+VPS54	4.4	251	3.4	6.2
CCT3+VPS53	3.7	251	3.1	5
HNRNPK+TRAPPC11	3.4	251	2.6	4.5
SAMM50+SCFD1	4.5	251	3.7	6.5
COPS4+SRPRB	2.4	250	1.9	3.3
COG3+SPCS3	2.7	250	2.3	3.4
MGAT5+MGAT5	-3.4	250	-4.6	-2.9
SON+TRAPPC5	3.3	250	2.8	4.4
MRPL54+PSMA7	2.6	249	2.2	3.4
SRP54+STX5	2.6	249	2.2	3.3
AP2A1+UBR4	2.6	248	2.1	3.4
PPP1R8+SARS	2.7	248	2.2	3.5
CCT4+SRPRB	2.6	247	2.1	3.6
AKAP9+MGAT5	-3.7	247	-4.6	-3.1
ERP44+SMC3	2.5	247	2.1	3.5
PSMC6+TRAPPC11	3.5	247	3	4.4
AP1M1+WDR11	-4	246	-5.3	-3.4
RRS1+VPS54	3.4	246	2.9	5.2
AP1M1+AP1M1	-4.1	246	-5.5	-3.5
SPATA5L1+VPS52	2.4	246	2	3.1
PSMD11+VPS52	2.5	245	2.1	3.3
IFFO1+TRAPPC5	4.4	245	3.7	5.5
AP1M1+THOC5	-3	245	-3.8	-2.6
VPS52+WDR43	3.5	245	2.9	4.5
SAMM50+TMED10	2.4	245	1.9	3.1
CCT3+SEC24A	2.4	244	2	3.2
KDM1A+VPS52	2.3	244	1.9	3.1
PSMD2+SEC24A	1.8	243	1.6	2.5
SEC24B+UTP20	2.9	243	2.4	4
SEC24A+VPS35	3.4	243	2.8	4.8
EIF6+SPCS3	4.3	243	3.6	5.5
EIF3H+SEC24B	2.1	242	1.8	2.8
DCTN1+RAB14	3.5	242	3	4.4
NAA25+VPS54	4.1	242	3.1	5.3
SEC24A+SF3A1	3.1	242	2.3	3.8
SCFD1+WDR3	4	242	3.3	5.7
MRPL51+RPL4	3.5	242	2.8	4.4
CHAF1A+VPS54	4.3	242	3.3	5.9
COG3+SEC24A	2.9	241	2.6	3.8
RRM1+SEC24B	3.9	241	3.4	5.2
TUBB+TUBB	2.8	241	2.4	4.1
SEC24A+TUBB	2.5	241	2.1	3.2
SPATA5L1+SRPRB	3.7	241	3.1	4.9
DCTN1+RPL7L1	4.2	240	3.5	5.6
STX5+TMED10	2.5	240	2.1	3.2
DCAF13+UBR4	2.9	240	2.5	4
ATP5A1+UBR4	3	239	2.4	3.8
MRPL51+STX5	2.4	239	2	3.1
COPB1+SEC22B	4.1	239	3.4	5.8
EIF3D+TRAPPC5	4.2	238	3.6	5.5
MRPL54+STX5	2.8	238	2.3	3.6
SPCS3+VCP	3.4	238	3	4.7
COG4+ST3GAL4	-2.9	237	-3.6	-2.4
AP1M1+SEC24C	1.9	237	1.6	2.4
MGAT5+WRB	-2.7	236	-3.5	-2.3
PSMD2+VPS54	4.1	236	3.4	5.3
SARS+VPS52	2.2	236	1.9	3.2
NAA25+SCFD1	2.7	235	2.2	3.7
MGAT5+TMED2	-2.7	234	-3.4	-2.2
RPL35A+UBR4	4.5	234	3.5	5.7
CHAF1A+SCFD1	3.5	234	3	5
SEC24B+UBA3	2.3	234	1.9	3.3
SCFD1+UBR4	4	234	3.6	5.6
RRS1+STX5	2.5	234	2	3.2
COG3+ERP44	2.4	233	2	3.2
DCTN1+SEC24B	3.5	233	2.9	4.4
ARL1+UGP2	3	233	2.6	3.8
ATP5B+VPS52	3.5	233	3	5
UBR4+VPS35	4.8	233	3.6	5.9
ARL1+ERP44	2.8	232	2.3	3.6
SNRPD3+UBR4	3.7	232	2.9	4.8
AP1M1+TMED2	-3.7	232	-4.6	-3.2
SARS+SEC24B	2.5	232	2.1	3.2
EIF3L+VPS54	2.1	232	1.8	3
UBR4+UTP20	3	232	2.5	4.1
CCT4+SCFD1	3.1	232	2.5	4.4
EIF3L+SRPRB	2.4	232	2	3.2
AP1M1+CCNA2	-2.9	231	-3.7	-2.5
COPS4+DCTN1	3.5	231	2.7	4.7
CCNA2+UGP2	2.8	231	2.3	3.6
ATP5A1+VPS52	3.6	231	2.2	4.4
COPS4+RTF1	2.6	231	2.1	3.4
RRM1+STX5	2.7	230	2.3	3.6
RPL4+VPS54	5.3	230	4.4	7.4
CCT3+SRP54	3.3	230	2.6	4.6
TUBB+VPS52	2.3	230	1.8	3
BAG6+SARS	3.1	230	2.5	4.2
NAA25+VPS52	2.4	230	2	3.1
AKAP9+GOLIM4	-2.8	230	-3.6	-2.3
IFFO1+MGAT5	-3.4	230	-4.5	-3
MRPL51+UBR4	2.8	230	2.2	3.8
RPL7L1+VPS52	2.7	230	2.3	3.6
COX7C+EIF3H	2.5	229	2.1	3.3
EIF3D+SEC24B	2.5	229	2	3.4
AP1M1+TRAPPC3	2.7	229	2.3	3.5
PPP1R8+STX5	2.3	229	1.9	2.9
CCT4+PSMA7	2.5	229	2.1	3.6
CCT4+SEC24B	2.4	229	2	3.3
SCFD1+SF3B2	3.4	229	2.6	4.8
RPL4+VPS52	3.2	228	2.7	4.6
COPS4+TTK	2.1	228	1.8	3
BAG6+RAB14	2.6	228	2	3.5
RTF1+WRB	2.9	228	2.4	3.8
SGTA+VPS52	2.5	228	2.1	3.2
BAG6+PPP1R8	2.8	227	2.2	3.7
RAB14+SRP54	2	226	1.6	2.5
RPL7L1+SRPRB	3.1	226	2.6	4.5
UGP2+WDR11	4.8	226	4.2	6.3
COX7C+MRPL51	2.9	226	2.4	3.9
RPL35+VPS52	2.8	226	2.2	3.6
RPL35A+SRPRB	2.5	225	2	3.3
DCTN1+SAMM50	3.5	225	2.5	4.8
CCT4+STX5	3.4	225	2.9	4.7
SRP54+UTP20	3.4	225	2.7	4.9
AP1M1+TMED10	-3	225	-3.7	-2.5
AP1M1+PTPN1	-3	224	-3.8	-2.5
PSMD11+TTK	3.3	224	2.5	4.6
PTPN1+SEC23IP	2.3	223	1.8	3
EIF6+ERP44	3.3	223	2.6	4.4
SF3B2+UBR4	3.8	222	3.2	5.2
COPB1+SEC24A	2.4	222	1.9	3.5
EIF3A+VPS54	3.7	222	3.1	4.9
SRP54+TMED2	2.1	222	1.8	2.7
DCTN1+PSMD11	3.7	222	3.2	4.9
SGTA+STX5	2.4	221	1.9	3
MYBL2+UBR4	3.2	221	2.6	4.2
BAG6+CCT3	2.7	220	2.3	3.9
SAMM50+UBR4	3.7	220	3.1	5
HNRNPK+ST3GAL4	-3.1	220	-3.9	-2.7
COX7C+UBR4	3	220	2.4	4
MYBL2+STX5	2.6	220	2.1	3.4
MYBL2+SEC24B	2.9	220	2.4	3.7
MRPL51+SRPRB	3	219	2.5	4
AP1M1+TRAPPC8	2.4	219	1.9	3.2
DCAF13+STX5	3.2	219	2.6	4
SNRPD3+VPS52	2.8	219	2.1	3.9
COG4+SPCS3	2.5	219	2	3.3
DCTN1+SARS	3.3	219	2.7	4.3
CHAF1A+MRPL54	3.1	219	2.4	4.2
RAB14+SRPRB	3.5	218	2.7	4.7
PSMC6+SCFD1	3.5	218	2.9	4.9
HNRNPK+SCFD1	2.6	218	2.1	3.4
AKAP9+AP1M1	-3.5	218	-4.4	-3.1
SEC24A+WDR43	2.5	217	1.9	3.4
ATP5B+UBR4	2.6	217	2	3.6
EIF3A+SAMM50	2.5	217	2	3.4
COG4+SCFD1	2.5	217	2	3.3
SMC3+VPS54	2.7	217	2.2	3.6
SEC24A+SNRPD3	3.3	217	2.6	4.3
DCTN1+GET4	3.2	216	2.8	4.5
EIF3H+UBR4	2.8	216	2.3	4.2
GOLIM4+SCFD1	2.5	216	2	3.2
EIF6+SCFD1	2.9	216	2	3.9
RPL35A+SPATA5L1	3.2	216	2.5	4.5
ATP5B+SCFD1	3.9	215	3.1	5.9
ARL1+MGAT5	-3.4	215	-4.3	-2.8
PSMD3+VPS52	2.7	215	2	3.5
UTP20+WRB	2.5	214	2	3.3
SAMM50+SPATA5L1	2.4	214	1.8	3.1
MRPL54+SRPRB	3.4	214	2.1	4.4
HNRNPK+MGAT5	-2.8	213	-3.6	-2.4
SPATA5L1+STX5	3	213	2.5	4.1
TTK+VPS52	3.8	213	2.7	5
RPL35A+STX5	2.4	212	1.9	3.1
UBA3+VPS54	5	212	3.8	7.4
ATP5B+SEC24B	3	211	2.5	4.2
MRPL51+PSMB6	3.1	211	2.2	4.2
COPS4+VPS54	2.8	211	2.3	3.9
DCTN1+EIF3A	2.7	211	2.3	3.8
ERP44+HNRNPK	2.4	210	1.9	3.1
BAG6+PSMB6	2.6	210	2.1	3.6
RPL7L1+SEC24A	2.9	210	2.4	3.6
AP1M1+SEC23B	1.8	209	1.5	2.3
SF3A1+VPS52	3.4	209	2.6	4.6
PSMC1+ST3GAL4	-2.7	209	-3.4	-2.2
TMED10+VPS52	2.7	209	2.2	3.4
TMED2+VPS54	2.2	209	1.8	2.9
PSMB6+UBR4	3.9	209	3	5.2
AP2A1+UBA3	2.6	209	2.1	3.7
RPL35+VPS54	2.7	209	2.1	3.6
AP2A1+PPP1R8	2.7	209	2.1	3.8
RAD21+RPS6	2.4	208	1.9	3.1
COPA+TRAPPC5	2.5	208	2.1	3.6
MGAT5+STX5	-2.8	208	-3.5	-2.3
DCAF13+VPS35	2.7	208	2.2	3.9
PSMA7+STX5	2.9	208	2.4	3.8
RTF1+SRP54	2.3	208	1.9	3
MRPL54+SRP54	2	208	1.6	2.6
PSMD2+SCFD1	4	208	3.2	5
EIF3L+SCFD1	3.6	208	3	4.8
DCTN1+RPL35A	4.3	207	3.5	6
VCP+VPS52	3.5	207	3.1	5
RTF1+SCFD1	3.9	207	3.2	6.1
[truncated: 3,536 more rows]

## Sheet: Unt vs Ricin rep 1
#GeneID	Element #	casTLE Effect	casTLE Score	Minimum Effect Estimate	Maximum Effect Estimate
GMDS+SEC22B	9	6.6	248	5.9	9.4
GMDS+SEC23B	9	6.5	248	6.1	9.5
GMDS+SF3A1	9	6.4	249	5.6	9.2
UGP2+UGP2	6	6.3	165	5.6	10.3
GMDS+SARS	9	6.3	249	5.6	9
GMDS+UTP20	9	6.3	249	5.5	9
CCT4+GMDS	9	6.3	249	5.6	9.1
GMDS+SUCO	9	6.3	249	5.9	9.2
GMDS+TRAPPC8	9	6.2	249	5.8	9.1
GMDS+TRAPPC3	9	6.2	249	5.8	9
GMDS+SEC24C	9	6.2	249	5.9	9.1
GMDS+SEC24A	9	6.2	249	5.8	9.1
GMDS+SEC23IP	9	6.2	249	5.9	9.2
GMDS+PSMD11	9	6.2	249	5.5	8.9
GMDS+RTF1	9	6.2	249	5.5	8.9
CCT3+GMDS	9	6.1	249	5.5	8.9
GMDS+UGP2	9	6.1	249	5.7	8.9
GMDS+MRPL54	9	6.1	249	5.3	8.7
GMDS+PSMA7	9	6.1	249	5.5	8.9
GMDS+WDR43	9	6.1	249	5.5	8.9
ERP44+GMDS	9	6.1	249	5.8	9
GMDS+TRAPPC11	9	6.1	249	5.8	9
ATP5B+GMDS	9	6.1	249	5.4	8.8
GMDS+SON	9	6.1	249	5.5	8.9
GMDS+TRAPPC5	9	6	250	5.5	8.7
GMDS+TMED2	9	6	249	5.6	8.8
GMDS+VPS52	9	6	250	5.5	8.7
GMDS+VPS53	9	6	250	5.5	8.7
GMDS+VPS35	9	6	249	5.4	8.7
ANAPC2+GMDS	9	6	250	5.2	8.6
SEC23B+TTK	9	6	249	5	8.8
GMDS+TMED10	9	6	250	5.6	8.8
ASNA1+GMDS	9	6	249	5.5	8.8
GMDS+MYBL2	9	6	250	5.3	8.6
GMDS+RPS6	9	6	249	5.2	8.6
VPS35+VPS53	9	6	249	5.1	8.6
GMDS+SCFD1	9	5.9	250	5.4	8.5
SEC22B+SEC24A	9	5.9	250	5	8.5
SEC22B+SUCO	9	5.9	250	4.9	8.7
GMDS+MRPL51	9	5.9	250	5.2	8.5
GMDS+THOC5	9	5.9	250	5.2	8.6
GMDS+UBA3	9	5.9	250	5.4	8.6
GMDS+SEC24B	9	5.9	250	5.5	8.7
GMDS+SRPRB	9	5.9	250	5.4	8.7
GMDS+RRM1	9	5.9	250	5.4	8.6
GMDS+SRP54	9	5.9	250	5.5	8.6
GMDS+RPL4	9	5.9	250	5.4	8.6
GMDS+PSMD3	9	5.9	250	5.3	8.6
GMDS+SPPL3	9	5.8	250	5.4	8.4
GMDS+VCP	9	5.8	250	5.4	8.5
GMDS+WRB	9	5.8	250	5.4	8.5
GMDS+NAA25	9	5.8	250	5.1	8.4
TRAPPC8+TTK	9	5.8	250	4.8	8.6
GMDS+KDM1A	9	5.8	250	5.1	8.3
ERP44+TRAPPC3	9	5.8	250	5.2	8.4
GMDS+VPS54	9	5.8	250	5.4	8.5
GMDS+SNRPD3	9	5.8	250	5.2	8.4
ASNA1+VCP	9	5.8	250	5	8.3
GMDS+GMDS	6	5.8	166	5.4	9.6
GMDS+SGTA	9	5.8	250	5.3	8.4
CAMLG+GMDS	9	5.8	250	5.3	8.4
GMDS+STX5	9	5.8	250	5.3	8.4
ERP44+SUCO	9	5.8	250	5.4	8.5
EIF3A+GMDS	9	5.8	250	5.2	8.4
GMDS+RAB14	9	5.8	250	5.4	8.5
EIF3L+GMDS	9	5.8	250	5.3	8.4
GMDS+RPL35A	9	5.8	250	5.4	8.5
GMDS+SPCS3	9	5.8	250	5.4	8.5
COX7C+GMDS	9	5.7	250	5.2	8.3
GET4+GMDS	9	5.7	250	5.2	8.3
ASNA1+SEC23B	9	5.7	250	5	8.2
SEC23B+VPS53	9	5.7	250	5.3	8.4
GMDS+RRS1	9	5.7	250	5.1	8.2
DCAF13+GMDS	9	5.7	250	5.1	8.2
CHAF1A+GMDS	9	5.7	250	5.2	8.3
GMDS+PSMC1	9	5.7	250	5.2	8.3
SARS+TRAPPC3	9	5.7	250	5.1	8.3
COPA+GMDS	9	5.7	250	5.1	8.3
AP2A1+GMDS	9	5.7	250	4.9	8.1
CAMLG+SRPRB	9	5.7	250	4.8	8.3
GMDS+TTK	9	5.7	250	5.1	8.2
TRAPPC3+VPS35	9	5.7	250	4.8	8.2
GMDS+SF3B2	9	5.6	251	5.2	8.2
SEC24C+SUCO	9	5.6	250	5.2	8.2
MRPL51+SEC22B	9	5.6	251	4.9	8.1
GMDS+SAMM50	9	5.6	250	5.1	8.2
COPS4+GMDS	9	5.6	250	5.1	8.2
ASNA1+SAMM50	9	5.6	250	4.7	8.2
BAG6+GMDS	9	5.6	251	5.2	8.2
GMDS+RPL7L1	9	5.6	251	5.1	8.2
THOC5+TRAPPC3	9	5.6	247	4.6	8.1
GMDS+UBR4	9	5.6	250	5.2	8.2
EIF3D+GMDS	9	5.6	251	5.1	8.2
COPB1+GMDS	9	5.6	250	4.8	8.1
GMDS+PSMD1	9	5.6	250	5.1	8.2
GMDS+IFFO1	9	5.6	251	5.1	8.2
RPL35A+SEC24C	9	5.6	250	4.6	8.3
GMDS+RPL35	9	5.6	250	5.1	8.2
ERP44+SEC23B	9	5.6	250	5.3	8.3
CAMLG+MRPL51	9	5.5	251	4.5	8.1
COG3+GMDS	9	5.5	251	4.8	8
SEC23B+TRAPPC8	9	5.5	251	5.2	8.2
SEC23B+TRAPPC3	9	5.5	251	5.2	8.2
SPPL3+UBA3	9	5.5	208	4.4	8.2
GMDS+WDR3	9	5.5	251	5	8
SEC23B+VPS54	9	5.5	251	4.8	8
ASNA1+ASNA1	6	5.5	166	4.7	9.2
GMDS+PPP1R8	9	5.5	251	5	8
EIF3D+TRAPPC3	9	5.5	245	4.6	8
RPL4+SEC22B	9	5.5	251	4.5	8.1
SEC23B+UGP2	9	5.5	251	5.1	8.1
GMDS+PSMB6	9	5.5	251	5	8.1
EIF3H+GMDS	9	5.5	251	5.1	8.1
CAMLG+VPS54	9	5.5	251	4.7	8
CAMLG+SARS	9	5.5	230	4.6	7.8
SEC23B+TRAPPC11	9	5.5	251	5.1	8.1
SARS+SEC23B	9	5.4	251	4.5	7.9
GMDS+HNRNPK	9	5.4	251	4.8	7.9
DCTN1+GMDS	9	5.4	251	5	8
ASNA1+RPL4	8	5.4	223	4.4	8.4
SUCO+VPS53	9	5.4	251	5	8
SEC23B+SPPL3	9	5.4	251	4.9	7.9
GMDS+PSMC6	9	5.4	251	4.9	8
SEC23IP+VPS53	9	5.4	251	5	8
AKAP9+GMDS	9	5.4	251	5	8
SEC22B+SEC23B	9	5.4	251	5.1	7.9
PRPF39+SEC22B	9	5.4	251	4.7	7.9
SF3A1+TRAPPC3	9	5.4	230	4.8	8
SEC24C+TRAPPC3	9	5.4	251	4.8	7.8
GMDS+GOLIM4	9	5.4	251	5	8
ERP44+SEC24C	9	5.4	251	5	8
ATP5A1+GMDS	9	5.4	251	4.9	7.9
GMDS+TUBB	9	5.4	251	5.1	7.9
SEC23B+SON	9	5.4	251	4.6	7.8
TRAPPC8+VPS53	9	5.4	251	4.4	7.8
SEC23B+SUCO	9	5.4	251	5	7.9
SPPL3+VCP	9	5.4	193	4.8	8
SEC24C+UGP2	9	5.4	251	5	8
GMDS+PRPF39	9	5.4	251	5	8
CCT3+SEC22B	8	5.3	223	4.3	8
GMDS+SMC3	9	5.3	251	4.8	7.8
RPL4+VPS54	6	5.3	120	4.4	8.8
ASNA1+UBA3	9	5.3	251	4.5	7.6
ASNA1+CAMLG	9	5.3	251	4.6	7.6
AP2A1+SF3A1	7	5.3	95.7	4.4	8.5
CCT3+TRAPPC8	8	5.3	223	4.5	8
CCNA2+GMDS	9	5.3	251	4.9	7.9
GMDS+PSMD2	9	5.3	251	4.9	7.9
PSMC1+SPATA5L1	9	5.3	27.7	4.6	9.5
SEC24C+VPS54	9	5.3	251	4.5	7.6
ERP44+TRAPPC8	9	5.3	251	4.9	7.8
ERP44+SEC22B	9	5.3	251	4.8	7.7
SAMM50+SEC22B	9	5.3	251	4.4	7.6
ASNA1+VPS54	9	5.3	251	4.5	7.6
ASNA1+COX7C	9	5.3	251	4.4	7.5
SEC23B+WDR3	9	5.3	251	4.4	7.6
CCT4+TRAPPC3	9	5.3	251	4.5	7.6
CAMLG+RPL35	9	5.3	241	4.3	7.5
SEC22B+WRB	9	5.3	251	4.4	7.5
SPCS3+SUCO	9	5.3	251	4.8	7.7
CAMLG+EIF3A	9	5.3	230	4.4	7.8
SUCO+UBR4	9	5.3	251	4.6	7.7
PSMD3+SARS	7	5.3	64.8	4.4	9
TRAPPC8+UGP2	9	5.2	252	4.7	7.6
SEC23B+TRAPPC5	9	5.2	252	4.7	7.5
RPS6+TRAPPC3	9	5.2	252	4.5	7.5
ASNA1+DCAF13	9	5.2	251	4.5	7.6
SEC22B+VPS53	9	5.2	251	4.5	7.5
AP2A1+SEC22B	9	5.2	252	4.2	7.7
EIF6+GMDS	9	5.2	251	4.7	7.6
COPB1+SEC23B	7	5.2	195	4.3	8.2
CAMLG+TRAPPC3	9	5.2	252	4.4	7.5
CAMLG+TRAPPC8	9	5.2	252	4.3	7.4
TRAPPC3+VPS54	9	5.2	252	4.6	7.6
SEC24C+SRPRB	9	5.2	252	4.4	7.4
SEC23B+SPCS3	9	5.2	252	4.8	7.7
RRM1+UBR4	5	5.2	82.7	4.3	9
RRM1+UGP2	9	5.2	229	4.2	7.7
ASNA1+EIF3H	9	5.2	252	4.7	7.6
GMDS+PTPN1	9	5.2	252	4.8	7.6
CAMLG+WRB	9	5.2	230	4.3	7.4
SEC24C+SPPL3	9	5.2	252	4.8	7.6
DCTN1+SEC24C	9	5.2	252	4.6	7.6
MRPL51+TRAPPC3	9	5.2	252	4.4	7.5
SEC23B+SEC23IP	9	5.2	252	4.8	7.6
RRM1+WDR3	4	5.2	36.8	4.4	9.4
ERP44+TRAPPC11	9	5.2	252	4.7	7.6
CAMLG+PSMA7	9	5.2	252	4.2	7.4
DCTN1+SEC23IP	9	5.2	252	4.2	7.7
SEC24C+VPS53	9	5.2	251	4.8	7.7
GMDS+SPATA5L1	9	5.2	252	4.7	7.6
SEC23IP+UGP2	9	5.2	251	4.8	7.7
EIF3D+SEC23B	9	5.2	252	4.2	7.5
SUCO+UGP2	9	5.2	252	4.7	7.5
ASNA1+VPS35	9	5.2	252	4.6	7.6
CAMLG+MYBL2	9	5.2	212	4.3	7.6
CAMLG+VPS35	9	5.2	252	4.6	7.6
RAB14+SEC23B	9	5.2	252	4.8	7.6
SEC24C+TRAPPC11	9	5.2	251	4.7	7.6
SEC22B+TRAPPC8	9	5.2	251	4.7	7.7
SEC23IP+SEC24C	9	5.2	252	4.8	7.6
VPS35+VPS54	9	5.2	252	4.3	7.5
TRAPPC11+UGP2	9	5.2	252	4.6	7.5
RRS1+TRAPPC3	9	5.2	251	4.2	7.6
GMDS+WDR11	8	5.2	223	4.6	7.8
CAMLG+EIF3H	9	5.2	252	4.4	7.5
SEC22B+SEC22B	6	5.1	167	4.5	8.5
COPA+TRAPPC3	9	5.1	252	4.2	7.3
RRM1+TRAPPC3	9	5.1	252	4.5	7.5
SUCO+VPS54	9	5.1	252	4.3	7.4
TRAPPC5+UBA3	8	5.1	195	4.1	8
SEC24C+UBR4	9	5.1	252	4.6	7.4
SEC24C+SNRPD3	9	5.1	252	4.2	7.4
CAMLG+SEC23B	9	5.1	252	4.7	7.5
SPCS3+VPS35	7	5.1	188	4.2	8.1
SEC24A+TRAPPC8	9	5.1	252	4.6	7.4
SEC22B+SPCS3	9	5.1	252	4.6	7.5
TRAPPC3+TRAPPC3	6	5.1	167	4.5	8.5
UGP2+WDR11	8	5.1	89.1	4.3	8.3
ERP44+SPPL3	9	5.1	252	4.6	7.4
CCT3+SEC23B	9	5.1	252	4.2	7.4
CAMLG+SEC23IP	9	5.1	252	4.7	7.6
MRPL51+SEC23B	9	5.1	252	4.2	7.4
SEC22B+SPPL3	9	5.1	252	4.6	7.5
SPCS3+TRAPPC8	9	5.1	252	4.4	7.4
ASNA1+MRPL54	9	5.1	252	4.3	7.3
SEC22B+SF3B2	8	5.1	224	4.5	7.8
SPPL3+TRAPPC3	9	5.1	252	4.6	7.5
TRAPPC8+TRAPPC8	6	5.1	167	4.3	8.5
TRAPPC3+UGP2	9	5.1	252	4.6	7.4
ERP44+SEC23IP	9	5.1	252	4.8	7.6
SUCO+TRAPPC3	9	5.1	252	4.7	7.5
TRAPPC11+VPS53	9	5.1	252	4.4	7.4
PSMD11+SEC22B	8	5.1	224	4.1	7.7
SEC23IP+TRAPPC3	9	5.1	252	4.6	7.5
NAA25+SEC22B	8	5	207	4.3	7.7
GET4+SEC22B	9	5	252	4	7.3
DCAF13+SEC23B	9	5	252	4.4	7.3
ASNA1+ERP44	9	5	252	4.6	7.4
SEC22B+SRPRB	9	5	231	4.1	7.2
CAMLG+SPPL3	9	5	252	4.3	7.2
SEC22B+SEC24C	9	5	252	4.3	7.3
BAG6+SEC23B	9	5	252	4.6	7.4
DCTN1+SEC22B	9	5	252	4.3	7.3
GMDS+MGAT5	9	5	252	4.7	7.5
ASNA1+SF3A1	9	5	243	4	7.4
ANAPC2+SEC22B	8	5	224	4.4	7.7
ASNA1+TRAPPC8	9	5	252	4.4	7.2
TRAPPC3+WDR43	9	5	252	4.2	7.2
CAMLG+UBA3	8	5	162	4.2	7.8
AKAP9+SEC22B	9	5	232	4.1	7.2
PSMB6+TRAPPC3	9	5	252	4	7.3
RTF1+SEC23B	9	5	252	4.5	7.3
SUCO+TRAPPC11	9	5	252	4.6	7.4
DCTN1+TRAPPC3	9	5	252	4.5	7.4
SEC24C+VPS52	9	5	252	4.6	7.4
ASNA1+SEC24C	9	5	252	4.4	7.3
RPL4+TRAPPC3	9	5	252	4	7.4
TRAPPC11+TRAPPC3	9	5	252	4.3	7.2
TRAPPC11+TRAPPC8	9	5	252	4.4	7.3
SEC24C+TRAPPC8	9	5	252	4.6	7.3
SEC22B+UBA3	7	5	196	4.3	8
SPPL3+SUCO	9	5	252	4.5	7.3
CAMLG+TRAPPC5	9	5	252	4.5	7.3
TRAPPC11+TRAPPC11	5	5	139	4.2	8.8
ERP44+VPS53	9	5	252	4.4	7.3
CHAF1A+TRAPPC3	9	5	252	4.3	7.2
ASNA1+RPL7L1	9	5	252	4.4	7.4
ASNA1+UTP20	9	5	252	4.4	7.3
CHAF1A+SEC22B	8	5	224	4.3	7.6
SEC23B+STX5	9	5	252	4.6	7.4
ASNA1+SEC23IP	9	5	252	4.6	7.4
ATP5B+TRAPPC3	9	5	252	4.4	7.3
SPPL3+TRAPPC8	9	5	252	4.5	7.3
ARL1+GMDS	9	5	252	4.6	7.4
RAB14+SEC24C	9	5	252	4.5	7.3
SEC22B+TTK	9	5	232	4.3	7.2
ASNA1+SARS	9	5	252	4.3	7.2
ATP5B+SRPRB	4	5	56.5	4.2	9.2
SEC24C+TTK	9	5	252	4.4	7.3
SEC23B+VPS52	9	5	252	4.5	7.3
CCT4+SEC22B	8	5	224	4	7.8
RRS1+SEC23B	9	5	231	4.2	7.2
ERP44+UGP2	9	5	252	4.5	7.3
CAMLG+ERP44	9	5	252	4.4	7.3
RPL7L1+TRAPPC3	9	4.9	253	4.2	7.1
SEC23B+UBR4	9	4.9	253	4.4	7.2
SPPL3+UGP2	9	4.9	253	4.4	7.2
SRP54+VPS53	9	4.9	252	4.1	7.1
SAMM50+SEC23B	9	4.9	252	4.3	7.2
COPA+TRAPPC8	9	4.9	253	4.1	7.1
TRAPPC3+VPS52	9	4.9	253	4.3	7.2
RPL4+SEC23B	9	4.9	252	4.1	7.1
ANAPC2+UGP2	9	4.9	191	3.7	7.3
GMDS+RAD21	9	4.9	252	4.2	7.1
ASNA1+TRAPPC5	9	4.9	253	4.3	7.1
PTPN1+SEC22B	9	4.9	252	4	7.2
SRP54+TRAPPC3	9	4.9	252	4.5	7.3
ASNA1+SPATA5L1	9	4.9	252	4.3	7.2
SEC24B+TRAPPC3	9	4.9	253	4.4	7.2
PSMB6+TRAPPC8	8	4.9	224	4.2	7.5
SEC24A+TRAPPC3	9	4.9	253	4.4	7.2
DCTN1+TRAPPC8	9	4.9	253	4.3	7
COG4+GMDS	9	4.9	253	4.5	7.2
SEC24C+SF3A1	9	4.9	252	4.4	7.3
SEC24B+SEC24C	9	4.9	253	4.4	7.2
TRAPPC3+VCP	8	4.9	206	3.9	7.6
SARS+SEC22B	9	4.9	253	4.4	7.2
SEC23IP+TRAPPC11	9	4.9	252	4.6	7.4
SEC24C+UTP20	9	4.9	253	4.3	7.1
SARS+SEC24C	9	4.9	252	4.3	7.1
COPS4+SEC22B	9	4.9	252	4.2	7.1
ASNA1+VPS52	9	4.9	252	4.3	7.1
SEC22B+UGP2	9	4.9	252	4.3	7.1
SF3B2+SRPRB	9	4.9	121	3.8	7.5
CAMLG+TRAPPC11	9	4.9	252	4.3	7.2
SEC23B+SEC24C	9	4.9	252	4.6	7.3
ASNA1+PSMD1	9	4.9	253	4.2	7.1
ASNA1+RRM1	8	4.9	224	4.3	7.5
SPCS3+TRAPPC3	9	4.9	253	4.4	7.2
PPP1R8+SF3B2	7	4.9	64.5	4	8.2
SEC22B+TRAPPC11	9	4.9	252	4.3	7.2
SEC23B+UBA3	9	4.9	230	4.2	7.1
RPL35+SNRPD3	8	4.9	24.6	4.3	8.8
SEC24A+VPS53	9	4.9	253	4.5	7.3
SEC24C+WDR43	9	4.9	253	4.2	7.1
DCAF13+TRAPPC3	9	4.9	253	4.1	7.1
SUCO+TRAPPC8	9	4.9	252	4.5	7.3
CAMLG+PSMB6	8	4.9	182	4.3	7.6
UGP2+VPS54	9	4.9	231	4.1	7.1
SEC23IP+TRAPPC8	9	4.9	252	4.6	7.3
HNRNPK+SEC23B	9	4.8	253	4.2	7
CAMLG+PSMD1	9	4.8	188	4.1	7
ASNA1+UGP2	9	4.8	253	4.4	7
CCNA2+SEC22B	9	4.8	222	3.8	7.1
TRAPPC3+WDR3	9	4.8	253	4.2	7
CAMLG+RPL35A	9	4.8	232	4	6.8
SEC22B+STX5	9	4.8	253	4	7
SEC24C+WDR3	9	4.8	253	4.3	7
ASNA1+SUCO	9	4.8	253	4.4	7
TRAPPC3+UBA3	9	4.8	253	4	7
RPS6+SEC22B	9	4.8	253	4.3	7
CCT3+TRAPPC11	7	4.8	156	3.9	7.8
ASNA1+SPCS3	9	4.8	253	4.4	7.1
RPS6+SEC24C	9	4.8	253	4.2	7.1
PSMD2+SEC22B	9	4.8	253	4	7
SEC22B+SNRPD3	9	4.8	253	4	6.8
MRPL54+TRAPPC11	9	4.8	215	3.8	7
SPPL3+TRAPPC11	9	4.8	253	4.3	7
ASNA1+UBR4	9	4.8	238	4.2	6.9
CAMLG+PSMD11	9	4.8	210	3.9	7.1
GMDS+ST3GAL4	9	4.8	253	4.5	7.1
PSMD11+SEC23B	9	4.8	253	4	6.9
CAMLG+SPCS3	9	4.8	253	4.3	7.1
SEC24C+UBA3	9	4.8	253	4.3	7
SEC24C+TRAPPC5	9	4.8	253	4.3	7.1
CAMLG+SEC24C	9	4.8	253	4.3	7
SEC24C+VPS35	9	4.8	253	4.3	7
SEC22B+TUBB	9	4.8	253	4.2	7.1
SEC22B+VCP	7	4.8	179	4.2	7.5
TRAPPC3+WRB	9	4.8	253	4.2	6.9
CAMLG+SUCO	9	4.8	253	4.4	7.1
RPL4+SEC24C	9	4.8	253	4.3	7.1
ANAPC2+SEC23B	9	4.8	253	4.2	7
SEC24C+SPCS3	9	4.8	253	4.4	7.1
CAMLG+RPL7L1	9	4.8	236	4.2	7
ASNA1+SPPL3	9	4.8	253	4.4	7.1
COX7C+SEC22B	9	4.8	253	4.3	7
CAMLG+COX7C	9	4.8	253	4.4	7.1
ASNA1+MRPL51	9	4.8	253	4.2	6.9
RRS1+SEC24C	9	4.8	253	4.3	7
MYBL2+SEC22B	8	4.8	225	4.3	7.3
RTF1+SEC24C	9	4.8	253	4.2	6.9
ASNA1+RPL35A	8	4.8	224	4.2	7.3
CAMLG+VPS53	9	4.8	253	4.3	7
SEC24A+SEC24C	9	4.8	253	4.5	7.1
DCAF13+PSMC1	7	4.8	68.2	4	8.5
COPS4+TRAPPC3	9	4.8	253	4.3	7
CCT4+SEC24C	9	4.8	253	4.2	7
SEC23IP+SUCO	9	4.8	253	4.5	7.1
ASNA1+TTK	9	4.8	253	4.1	6.9
VPS35+VPS52	9	4.8	205	4.1	7
MYBL2+SEC24C	9	4.8	253	4.1	6.9
CAMLG+EIF3L	9	4.8	232	4.1	6.9
SEC22B+SRP54	9	4.8	253	4.3	7.1
AP2A1+SEC24C	9	4.8	253	4.2	7.1
ASNA1+TRAPPC11	9	4.7	253	4.2	6.9
PSMD11+TRAPPC3	9	4.7	253	4.2	6.9
SPCS3+TRAPPC11	8	4.7	215	4.1	7.1
SAMM50+TRAPPC3	9	4.7	253	4.1	6.8
SEC22B+VPS54	9	4.7	253	4.2	6.9
SEC22B+VPS52	9	4.7	253	4.2	6.9
PSMD3+TRAPPC3	9	4.7	232	4.1	6.9
TRAPPC3+VPS53	9	4.7	253	4.2	6.9
SEC22B+SEC24B	9	4.7	253	4.3	7
PPP1R8+TRAPPC3	9	4.7	253	4.1	6.8
CHAF1A+SEC23B	9	4.7	253	4.1	6.8
ASNA1+COPA	9	4.7	253	4.2	6.9
EIF3A+TRAPPC3	9	4.7	237	4	6.8
SGTA+TRAPPC3	9	4.7	253	4.2	6.8
SARS+SUCO	9	4.7	253	4	6.8
SEC22B+UTP20	8	4.7	225	4.1	7.1
ASNA1+RRS1	9	4.7	253	4.3	6.9
SEC22B+SEC23IP	9	4.7	253	4	6.8
ASNA1+GET4	9	4.7	253	4.1	6.9
ASNA1+TRAPPC3	9	4.7	253	4.1	6.8
SEC23B+SEC23B	6	4.7	168	4.2	7.8
SEC23B+SRP54	9	4.7	253	4.3	6.9
RRM1+SEC23B	9	4.7	253	4.2	6.9
ASNA1+SCFD1	9	4.7	244	4	6.8
MYBL2+UGP2	9	4.7	228	4	6.8
SEC24A+TRAPPC11	9	4.7	253	4.2	6.9
MRPL51+TRAPPC5	9	4.7	191	3.5	7
COX7C+TRAPPC3	9	4.7	253	4.1	6.9
SEC23B+SNRPD3	9	4.7	253	4.1	6.8
RPS6+UGP2	9	4.7	203	3.7	6.8
SEC23B+SRPRB	9	4.7	253	4.2	6.9
RPL35+SEC22B	9	4.7	253	4.1	6.8
SEC23B+SF3B2	9	4.7	253	4.2	6.9
TRAPPC3+UBR4	9	4.7	253	4.1	6.8
NAA25+SEC23B	9	4.7	253	3.9	6.8
AP2A1+ASNA1	9	4.7	231	4	6.8
SNRPD3+TRAPPC3	9	4.7	230	3.9	6.8
GET4+SEC23B	9	4.7	253	4.2	6.9
ERP44+RPL35A	9	4.7	253	3.5	7
ASNA1+VPS53	9	4.7	253	4.2	6.8
CHAF1A+SRPRB	7	4.7	178	3.8	7.5
SEC22B+TMED2	9	4.7	253	4.2	7
RRS1+TRAPPC8	9	4.7	253	4.1	6.9
TRAPPC8+VPS54	9	4.7	231	4	6.7
AP2A1+UGP2	9	4.7	252	4.1	6.9
ASNA1+SF3B2	9	4.7	253	4.2	6.9
CAMLG+SNRPD3	9	4.7	222	4	6.9
PSMB6+SPPL3	9	4.7	231	3.7	6.8
SEC24C+SON	9	4.7	253	3.9	6.8
SEC24A+VPS54	9	4.7	253	3.9	6.8
SEC22B+TRAPPC5	9	4.7	253	4.1	6.8
IFFO1+SEC22B	9	4.7	253	4	6.9
CAMLG+IFFO1	9	4.7	253	4.1	6.9
CAMLG+VPS52	8	4.7	208	4.2	7.2
CAMLG+WDR3	9	4.7	234	4	6.8
ASNA1+MYBL2	8	4.7	225	4	7.1
RPL7L1+SEC24C	9	4.7	249	4.2	6.9
PSMA7+VPS53	9	4.7	253	3.8	6.9
SCFD1+VPS53	8	4.7	170	4	7.1
SEC24C+SRP54	9	4.7	253	4.3	6.9
SEC24C+STX5	9	4.7	253	4.1	6.8
NAA25+SEC24C	9	4.7	252	4	6.8
PPP1R8+VPS53	9	4.7	253	3.8	6.7
SPCS3+UGP2	9	4.6	253	4	6.7
SEC24C+SF3B2	9	4.6	253	3.9	6.7
SCFD1+SPCS3	8	4.6	225	4	7
ANAPC2+TRAPPC3	9	4.6	253	4.1	6.8
SCFD1+TRAPPC8	9	4.6	253	3.7	6.7
TRAPPC3+UTP20	9	4.6	207	4.1	6.7
ASNA1+DCTN1	9	4.6	253	4.2	6.8
SRPRB+VPS53	9	4.6	234	3.9	6.7
SPCS3+SPPL3	9	4.6	253	4	6.7
CAMLG+COPS4	9	4.6	254	4.1	6.7
MYBL2+TRAPPC3	9	4.6	253	3.8	6.7
MYBL2+TRAPPC8	9	4.6	244	4.1	6.8
MYBL2+SEC23IP	9	4.6	244	3.7	6.8
CAMLG+CAMLG	6	4.6	168	4.1	7.7
EIF3D+SEC22B	9	4.6	253	3.5	6.7
SUCO+VPS52	9	4.6	254	4.1	6.7
EIF3H+SEC24C	9	4.6	253	4	6.8
SRPRB+TRAPPC8	9	4.6	253	3.8	6.6
RPL4+VPS53	9	4.6	207	3.6	6.7
SEC23B+SF3A1	9	4.6	253	4	6.7
SEC24A+UGP2	9	4.6	254	4.1	6.7
COX7C+SEC23B	9	4.6	253	4.1	6.8
PPP1R8+SEC23B	9	4.6	254	4.1	6.7
PSMA7+SEC22B	8	4.6	225	3.8	6.9
SEC23B+WRB	9	4.6	253	4.1	6.7
SEC23B+SGTA	9	4.6	253	4.1	6.7
SEC22B+SMC3	9	4.6	235	3.6	6.7
ANAPC2+VPS53	9	4.6	209	3.6	6.8
ASNA1+EIF3D	8	4.6	215	3.7	7.1
ASNA1+EIF3L	9	4.6	253	4.1	6.7
PRPF39+TRAPPC3	9	4.6	253	4.1	6.8
SRPRB+TRAPPC3	9	4.6	253	4	6.7
SEC24C+SEC24C	6	4.6	168	4	7.6
STX5+TRAPPC3	9	4.6	253	4.1	6.8
SEC23B+SPATA5L1	9	4.6	253	3.8	6.7
COPB1+SEC24C	8	4.6	225	4	7
TRAPPC3+TRAPPC8	9	4.6	253	4.1	6.7
MRPL54+TRAPPC3	9	4.6	253	4	6.7
CAMLG+CCT4	9	4.6	241	4.1	6.8
COPA+UGP2	9	4.6	151	3.4	7.1
BAG6+SEC24C	9	4.6	253	4.2	6.8
RPL4+VCP	4	4.6	50.6	3.9	8.5
SEC24B+VPS53	9	4.6	254	4.1	6.7
SEC23B+UTP20	9	4.6	254	4	6.7
CAMLG+EIF6	9	4.6	184	3.9	6.8
ASNA1+SEC22B	9	4.6	253	3.9	6.6
CHAF1A+SEC24C	9	4.6	253	4.1	6.8
SAMM50+SEC23IP	9	4.6	208	3.9	6.7
RPS6+SUCO	9	4.6	233	3.7	6.7
RTF1+TRAPPC8	9	4.6	253	4.1	6.8
RTF1+TRAPPC3	9	4.6	253	4.1	6.8
TRAPPC8+VPS35	9	4.6	253	4.1	6.8
ASNA1+PSMD11	9	4.6	253	4.1	6.8
SEC24C+VCP	9	4.6	254	4.1	6.7
CAMLG+RRS1	9	4.6	229	4	6.8
DCTN1+SEC23B	9	4.6	253	4.1	6.8
ATP5B+SEC23B	9	4.6	253	4.1	6.8
SEC23IP+SPCS3	9	4.6	253	4.2	6.8
ATP5A1+CAMLG	9	4.6	253	3.9	6.6
MYBL2+TRAPPC11	7	4.6	165	3.8	7.2
PPP1R8+SEC24C	9	4.6	253	4.2	6.8
RPS6+SEC23B	9	4.6	253	4	6.6
CAMLG+SON	9	4.6	180	3.9	6.9
RPS6+VPS53	7	4.6	196	3.9	7.4
EIF3A+SEC23B	9	4.6	253	4.1	6.8
PSMD3+SUCO	9	4.6	248	3.6	6.6
RTF1+SEC24A	9	4.6	209	3.7	6.7
SCFD1+SEC24B	9	4.6	227	3.8	6.7
SEC24A+SEC24B	9	4.6	253	4	6.7
ANAPC2+ASNA1	9	4.6	253	4	6.7
RRM1+VPS53	8	4.6	186	3.8	7
TRAPPC8+UBA3	9	4.6	253	4	6.7
SEC23IP+SPPL3	9	4.6	254	4.3	6.9
SPATA5L1+VPS53	9	4.6	253	3.9	6.7
TRAPPC11+VPS54	9	4.6	244	4	6.7
NAA25+TRAPPC3	9	4.5	252	3.8	6.6
CAMLG+PSMD2	9	4.5	237	4	6.7
CAMLG+MRPL54	9	4.5	254	4	6.7
COG3+SEC24C	9	4.5	224	4	6.7
RPS6+TRAPPC8	9	4.5	254	3.9	6.6
EIF3D+SEC24C	9	4.5	254	4	6.6
TMED10+TRAPPC3	9	4.5	254	4.1	6.7
SEC23B+VCP	9	4.5	254	4	6.6
UTP20+VPS53	7	4.5	166	3.8	7.2
RRM1+TRAPPC8	8	4.5	225	3.9	6.9
MRPL51+SEC24C	9	4.5	254	3.9	6.6
SRPRB+VPS54	8	4.5	225	3.4	7
SCFD1+SUCO	9	4.5	254	3.9	6.6
CAMLG+DCTN1	9	4.5	254	3.9	6.6
PSMB6+SUCO	9	4.5	233	3.8	6.6
EIF3L+SEC22B	9	4.5	253	3.9	6.6
CAMLG+COPA	9	4.5	197	3.9	6.7
RAB14+TRAPPC3	9	4.5	254	3.9	6.5
ASNA1+WDR11	8	4.5	225	3.9	6.9
EIF3L+TRAPPC3	9	4.5	254	4.1	6.7
CAMLG+RPS6	9	4.5	206	3.8	6.5
PSMB6+SEC24C	9	4.5	254	3.9	6.5
IFFO1+TRAPPC11	9	4.5	197	3.6	6.7
TRAPPC8+WDR3	9	4.5	254	4	6.6
SCFD1+SEC23B	9	4.5	254	3.9	6.5
DCTN1+SEC24A	9	4.5	179	3.9	6.6
MRPL54+WDR3	8	4.5	68.4	3.5	7.8
MRPL51+TRAPPC8	9	4.5	254	3.9	6.6
ASNA1+SRPRB	9	4.5	254	4	6.6
SAMM50+UGP2	9	4.5	220	3.6	6.6
TRAPPC3+TTK	9	4.5	228	3.9	6.6
COX7C+TRAPPC8	9	4.5	254	4	6.7
SEC22B+UBR4	8	4.5	216	3.9	6.8
TRAPPC5+UGP2	9	4.5	254	4	6.7
ASNA1+RPS6	9	4.5	216	3.9	6.6
CAMLG+UGP2	9	4.5	254	4.1	6.7
SARS+SCFD1	7	4.5	160	3.6	7.2
MRPL51+VPS54	8	4.5	149	3.5	7.2
ASNA1+SEC24A	9	4.5	254	4.1	6.6
SAMM50+SEC24C	9	4.5	254	4.1	6.7
SEC24B+UGP2	9	4.5	254	4	6.7
SEC24A+SUCO	9	4.5	254	4.1	6.7
RPL7L1+SEC23B	9	4.5	254	3.9	6.6
CAMLG+TTK	9	4.5	217	3.9	6.6
TMED2+TRAPPC3	9	4.5	254	4	6.6
AP2A1+SEC23B	9	4.5	254	3.9	6.6
ATP5B+VPS53	8	4.5	208	3.7	6.9
TRAPPC8+UTP20	9	4.5	244	3.9	6.6
ERP44+SEC24A	9	4.5	254	4.1	6.7
ERP44+VPS54	9	4.5	254	3.9	6.6
ASNA1+CHAF1A	9	4.5	254	3.7	6.5
SCFD1+SPPL3	9	4.5	231	3.9	6.6
UGP2+VPS53	9	4.5	254	4	6.6
ASNA1+PSMD3	9	4.5	254	4	6.6
SON+TRAPPC3	9	4.5	247	3.9	6.6
SARS+TTK	6	4.5	73.9	3.6	7.9
ASNA1+BAG6	9	4.5	254	4	6.6
ERP44+SPCS3	9	4.5	254	4	6.6
ARL1+SEC22B	9	4.5	254	3.7	6.6
PSMB6+SEC23B	9	4.5	254	3.8	6.6
SEC24B+TRAPPC11	9	4.5	253	4	6.6
DCAF13+SEC24C	9	4.5	254	4	6.6
RRM1+SEC24C	9	4.5	244	4	6.7
TRAPPC8+VPS52	9	4.5	254	4.1	6.7
PSMD1+SEC23B	9	4.5	254	3.7	6.5
ASNA1+WRB	9	4.5	254	4	6.6
ASNA1+WDR43	9	4.5	254	3.7	6.5
RTF1+VPS53	8	4.5	221	3.8	6.8
ASNA1+GOLIM4	9	4.5	254	4	6.6
SEC24C+SGTA	9	4.5	254	4.1	6.6
EIF6+SEC22B	8	4.5	184	3.8	6.9
PSMA7+SEC23B	9	4.5	254	4.1	6.7
SEC23IP+SEC24A	9	4.5	254	4.2	6.8
SPPL3+VPS53	9	4.5	253	4.1	6.7
ANAPC2+TRAPPC11	9	4.5	233	3.3	6.6
COPB1+TRAPPC11	4	4.5	86.9	3.8	8.3
GET4+TRAPPC3	9	4.5	254	4.1	6.7
SCFD1+VPS54	8	4.5	197	3.8	7
ATP5A1+TRAPPC3	9	4.5	254	3.9	6.5
TRAPPC11+VPS35	8	4.5	217	3.7	6.8
ASNA1+COPS4	9	4.5	254	3.8	6.5
ASNA1+NAA25	9	4.5	254	3.8	6.5
CAMLG+EIF3D	9	4.5	233	3.9	6.6
UGP2+VPS52	9	4.5	233	4	6.6
SAMM50+TRAPPC11	7	4.5	160	3.6	7.2
UBA3+VPS53	7	4.5	197	3.6	7.1
CAMLG+PSMD3	9	4.4	209	3.7	6.4
UTP20+VPS52	7	4.4	96.4	3.8	7.1
CCT3+SEC24C	9	4.4	254	4	6.6
MYBL2+RPS6	3	4.4	39.3	3.8	7.8
EIF3A+SEC22B	9	4.4	254	3.8	6.5
IFFO1+VPS53	9	4.4	237	3.4	6.4
PPP1R8+TRAPPC8	9	4.4	254	3.9	6.5
EIF3A+SEC24C	9	4.4	254	3.8	6.4
COG3+TRAPPC3	8	4.4	173	3.7	6.9
EIF3H+SEC22B	9	4.4	254	4	6.6
ATP5A1+SEC22B	9	4.4	254	3.8	6.5
ASNA1+PSMA7	9	4.4	254	3.6	6.3
SEC23IP+SRPRB	9	4.4	254	3.9	6.4
COPA+SEC24C	9	4.4	254	3.8	6.4
ANAPC2+SEC24C	9	4.4	254	3.9	6.5
SEC23B+VPS35	9	4.4	254	3.9	6.5
SEC22B+WDR43	9	4.4	254	3.8	6.5
PSMD2+TRAPPC3	9	4.4	254	3.9	6.5
BAG6+VPS53	9	4.4	246	3.5	6.4
SEC22B+SF3A1	8	4.4	216	3.9	6.8
RPL35+TRAPPC3	9	4.4	254	3.9	6.5
ARL1+TRAPPC3	8	4.4	171	3.8	7
EIF6+SEC23B	9	4.4	233	3.5	6.4
TRAPPC11+UTP20	6	4.4	147	3.6	7.5
CCT3+TRAPPC3	9	4.4	254	3.7	6.4
SEC24B+TRAPPC8	9	4.4	254	4.1	6.5
RTF1+TRAPPC11	8	4.4	201	3.8	6.8
SCFD1+WRB	8	4.4	156	3.1	6.8
MYBL2+SEC23B	9	4.4	254	3.9	6.5
SARS+TRAPPC8	9	4.4	254	3.9	6.5
SEC24A+SPCS3	9	4.4	254	3.8	6.5
RPL35A+SEC23B	9	4.4	254	3.8	6.4
CAMLG+PPP1R8	9	4.4	247	3.8	6.5
BAG6+TRAPPC3	9	4.4	254	3.9	6.4
TRAPPC3+TRAPPC5	9	4.4	254	3.8	6.4
ERP44+TRAPPC5	9	4.4	254	4	6.5
SCFD1+SRPRB	7	4.4	197	3.4	7
ASNA1+SEC24B	9	4.4	254	4	6.5
SPCS3+WDR43	8	4.4	168	3.4	6.7
SCFD1+SEC23IP	9	4.4	254	3.7	6.5
CAMLG+UBR4	9	4.4	231	3.9	6.5
RRM1+SPPL3	9	4.4	209	3.5	6.4
BAG6+MYBL2	7	4.4	61.8	3.5	8.1
SON+SPPL3	8	4.4	88.5	3.2	6.9
CAMLG+RTF1	9	4.4	191	3.9	6.5
DCTN1+UGP2	9	4.4	233	3.8	6.5
ASNA1+HNRNPK	9	4.4	254	3.8	6.5
BAG6+SEC22B	9	4.4	254	4	6.6
ASNA1+RAB14	9	4.4	232	3.9	6.5
SCFD1+TRAPPC11	9	4.4	254	3.8	6.5
BAG6+RRM1	7	4.4	93.8	3.5	7.5
CAMLG+SAMM50	9	4.4	207	3.8	6.5
EIF6+TRAPPC8	9	4.4	238	3.7	6.3
UGP2+VPS35	9	4.4	233	3.7	6.4
SARS+VPS53	9	4.4	254	3.9	6.5
TRAPPC8+UBR4	9	4.4	254	4	6.5
SEC24C+THOC5	9	4.4	254	3.9	6.5
MYBL2+SPPL3	8	4.4	205	3.5	6.8
ASNA1+RTF1	9	4.4	254	3.9	6.5
SEC22B+TMED10	9	4.4	254	3.7	6.4
CAMLG+SEC22B	8	4.4	226	3.9	6.8
AP2A1+CAMLG	9	4.4	254	3.7	6.4
SEC23B+SEC24A	9	4.4	254	4	6.5
SPPL3+VPS54	9	4.4	254	3.6	6.4
RPL35A+SEC22B	8	4.4	210	3.7	6.6
CAMLG+SEC24B	9	4.4	252	3.8	6.5
PSMA7+UGP2	9	4.4	188	3.6	6.5
VPS53+WDR43	9	4.4	199	3.7	6.5
TRAPPC11+VPS52	9	4.4	254	3.8	6.5
AKAP9+ASNA1	9	4.4	254	3.8	6.4
SEC23IP+TRAPPC5	9	4.4	254	3.9	6.3
ARL1+ASNA1	9	4.4	229	3.8	6.5
SNRPD3+TRAPPC8	9	4.4	254	3.8	6.5
CAMLG+WDR43	9	4.3	252	3.8	6.3
SCFD1+TRAPPC3	9	4.3	255	3.9	6.3
DCTN1+DCTN1	6	4.3	87.5	3.6	7.2
PSMC6+SEC23B	9	4.3	254	3.6	6.3
AP2A1+TRAPPC3	9	4.3	254	3.7	6.3
ASNA1+THOC5	9	4.3	252	3.7	6.2
SEC24C+WRB	9	4.3	254	3.9	6.3
SUCO+WDR3	9	4.3	254	3.6	6.3
SEC22B+VPS35	9	4.3	254	3.6	6.2
CAMLG+THOC5	9	4.3	233	3.8	6.4
ASNA1+ATP5B	9	4.3	254	3.8	6.4
EIF3D+SPPL3	9	4.3	249	3.4	6.3
IFFO1+TRAPPC5	9	4.3	140	3	6.4
IFFO1+TRAPPC3	9	4.3	237	3.8	6.3
PSMD1+SEC22B	9	4.3	254	3.8	6.3
SUCO+SUCO	6	4.3	169	3.7	7
ASNA1+SNRPD3	9	4.3	254	3.7	6.3
SEC24C+SPATA5L1	9	4.3	254	3.7	6.3
SRP54+TRAPPC8	9	4.3	254	4	6.4
ARL1+TRAPPC8	9	4.3	172	3.5	6.4
SPCS3+VPS54	9	4.3	223	3.5	6.3
ERP44+UBR4	9	4.3	254	3.8	6.3
ATP5B+SEC24C	9	4.3	255	3.8	6.2
ASNA1+EIF3A	9	4.3	254	3.8	6.3
SEC23B+THOC5	9	4.3	254	3.9	6.5
AP1M1+GMDS	9	4.3	254	3.8	6.3
SUCO+UTP20	9	4.3	241	3.7	6.3
RAB14+SUCO	9	4.3	254	3.9	6.4
MRPL54+SEC22B	9	4.3	254	3.9	6.4
SEC23IP+VPS54	9	4.3	254	3.8	6.3
EIF3H+TRAPPC3	9	4.3	254	3.8	6.4
EIF3D+WRB	8	4.3	43.3	3.4	7.3
ATP5B+TRAPPC11	7	4.3	169	3.5	6.8
COPB1+TRAPPC3	5	4.3	140	3.6	7.2
SEC22B+THOC5	9	4.3	255	3.8	6.3
TMED2+TRAPPC8	9	4.3	254	3.8	6.4
TMED10+UGP2	9	4.3	254	3.7	6.2
SF3B2+SUCO	9	4.3	208	3.2	6.2
ATP5B+SPCS3	6	4.3	149	3.7	7
SCFD1+UBR4	6	4.3	120	3.5	7
SEC24C+TUBB	9	4.3	254	3.8	6.3
CAMLG+RAB14	9	4.3	192	3.8	6.4
EIF3L+SEC23B	9	4.3	255	4	6.4
SPPL3+UTP20	9	4.3	228	3.5	6.2
SEC23B+SEC24B	9	4.3	255	3.9	6.3
DCTN1+SCFD1	7	4.3	169	3.7	6.8
CAMLG+UTP20	9	4.3	234	3.8	6.4
EIF3H+SEC23B	9	4.3	254	3.8	6.3
COPB1+UGP2	8	4.3	216	3.4	6.7
CAMLG+SRP54	9	4.3	177	3.6	6.4
COX7C+VPS53	9	4.3	245	3.6	6.3
AKAP9+CAMLG	9	4.3	192	3.8	6.4
DCTN1+VPS53	9	4.3	235	3.8	6.3
SPATA5L1+TRAPPC3	9	4.3	254	3.7	6.3
CAMLG+SPATA5L1	9	4.3	221	3.6	6.3
SEC24B+SUCO	9	4.3	254	3.9	6.4
ASNA1+PRPF39	9	4.3	254	3.7	6.4
PSMA7+TRAPPC3	9	4.3	253	3.8	6.3
STX5+UTP20	8	4.3	72.7	3.3	7.2
SPPL3+TRAPPC5	9	4.3	255	3.8	6.2
SCFD1+SEC24C	9	4.3	255	3.8	6.3
SCFD1+SEC24A	9	4.3	234	3.7	6.3
ASNA1+WDR3	9	4.3	254	3.8	6.3
ERP44+VPS52	9	4.3	254	3.9	6.3
CAMLG+TUBB	9	4.3	254	3.7	6.2
SEC22B+TRAPPC3	9	4.3	254	3.9	6.4
TRAPPC5+VPS54	9	4.3	224	3.6	6.3
ATP5B+CAMLG	9	4.3	178	3.5	6.5
UGP2+UTP20	9	4.3	254	3.8	6.4
CHAF1A+VPS53	8	4.3	226	3.8	6.6
SNRPD3+VPS53	9	4.3	183	3.4	6.3
DCTN1+SUCO	9	4.3	254	3.7	6.3
GET4+SEC24C	9	4.3	255	3.8	6.2
COPB1+SPCS3	5	4.3	140	3.6	7.3
SPCS3+WDR11	7	4.3	87.5	3.4	7.5
TRAPPC5+TRAPPC8	9	4.3	254	3.7	6.3
RTF1+SEC22B	7	4.3	197	3.8	6.8
CAMLG+SEC24A	9	4.3	254	3.7	6.4
RPL35+SEC23B	9	4.3	254	3.9	6.4
MRPL54+SEC23B	9	4.3	254	3.8	6.4
BAG6+CAMLG	9	4.3	254	3.7	6.4
SARS+WDR3	7	4.3	30.8	3.6	7.7
ASNA1+TUBB	9	4.3	254	3.8	6.3
PSMB6+TRAPPC11	7	4.3	167	3.4	7.1
SUCO+TRAPPC5	9	4.3	255	3.9	6.3
SEC24A+SPPL3	9	4.3	255	3.9	6.3
SPPL3+UBR4	9	4.2	255	3.7	6.2
EIF3L+SEC24C	9	4.2	255	3.8	6.2
SCFD1+UGP2	9	4.2	255	3.5	6.1
TMED10+TRAPPC8	9	4.2	255	3.7	6.1
COPS4+SEC23B	9	4.2	255	3.8	6.2
RAB14+TRAPPC8	9	4.2	255	3.8	6.2
AP2A1+TRAPPC8	9	4.2	255	3.5	6.1
KDM1A+SEC22B	9	4.2	255	3.3	6
ASNA1+ATP5A1	9	4.2	255	3.7	6.1
ASNA1+IFFO1	9	4.2	255	3.8	6.2
KDM1A+TRAPPC8	9	4.2	255	3.4	6
CAMLG+NAA25	9	4.2	178	3.5	6.1
CAMLG+SF3B2	9	4.2	252	3.7	6.2
TRAPPC11+VCP	6	4.2	169	3.5	6.9
RPL35A+UGP2	9	4.2	238	3.6	6.2
PSMB6+VPS53	8	4.2	196	3.3	6.3
PSMD3+SEC23B	9	4.2	255	3.7	6.1
SON+SPCS3	8	4.2	154	3.1	6.6
SPCS3+SPCS3	5	4.2	141	3.6	7.2
ASNA1+PPP1R8	9	4.2	255	3.7	6.1
RRS1+SPCS3	6	4.2	116	3.4	7.1
SPCS3+VPS53	8	4.2	226	3.7	6.4
ASNA1+RPL35	9	4.2	255	3.7	6.1
SRPRB+TRAPPC11	9	4.2	245	3.4	6.1
ATP5B+ERP44	9	4.2	255	3.4	6
TTK+UGP2	9	4.2	210	3.5	6.1
RPL35A+VPS54	6	4.2	145	3.3	7.1
CAMLG+PTPN1	9	4.2	221	3.6	6.1
PSMB6+SPCS3	7	4.2	156	3.5	6.7
TMED2+UGP2	9	4.2	254	3.7	6.2
COPA+SEC23B	9	4.2	255	3.7	6.2
PTPN1+TRAPPC3	9	4.2	253	3.5	6.1
STX5+TRAPPC8	9	4.2	255	3.8	6.2
SEC23IP+STX5	9	4.2	255	3.8	6.2
SEC23IP+VPS52	9	4.2	255	3.8	6.2
UGP2+WRB	9	4.2	254	3.5	6.1
NAA25+SUCO	9	4.2	214	3.2	6.1
UBR4+UGP2	9	4.2	255	3.6	6.1
PSMD1+TRAPPC8	9	4.2	255	3.5	6.1
MRPL54+SEC24C	9	4.2	255	3.8	6.2
COPS4+SEC24C	9	4.2	255	3.7	6.1
THOC5+TRAPPC8	9	4.2	255	3.8	6.3
RPL35A+TRAPPC3	9	4.2	255	3.6	6.1
SCFD1+WDR3	6	4.2	138	3.3	6.9
ERP44+SEC24B	9	4.2	254	3.8	6.2
CAMLG+HNRNPK	9	4.2	182	3.5	6.1
SEC23B+TUBB	9	4.2	255	3.7	6.1
KDM1A+SEC23B	9	4.2	255	3.7	6.1
COX7C+SEC24C	9	4.2	254	3.8	6.3
STX5+TRAPPC11	9	4.2	255	3.6	6.1
ASNA1+PSMD2	9	4.2	255	3.7	6.1
SON+TRAPPC8	9	4.2	254	3.6	6.2
CCT4+SUCO	9	4.2	231	3.3	6.1
ATP5A1+SEC23B	9	4.2	255	3.7	6.2
ASNA1+CCT4	9	4.2	255	3.8	6.2
PSMD1+SPPL3	9	4.2	201	3.5	6.2
TRAPPC11+TTK	8	4.2	179	3.6	6.5
COG4+SEC24C	9	4.2	255	3.6	6.2
ERP44+VPS35	9	4.2	254	3.7	6.2
CCT3+SUCO	6	4.2	160	3.3	6.9
SEC23B+WDR43	9	4.2	255	3.6	6.1
EIF6+SEC24C	9	4.2	255	3.5	6.1
RRM1+SEC22B	8	4.2	226	3.7	6.4
PPP1R8+SEC22B	9	4.2	254	3.8	6.3
TRAPPC5+VCP	7	4.2	168	3.3	6.7
TRAPPC5+VPS53	9	4.2	255	3.5	6
SEC22B+SGTA	9	4.2	237	3.7	6.1
STX5+UGP2	9	4.2	236	3.6	6.1
KDM1A+SCFD1	7	4.2	172	3.4	6.6
PSMA7+VPS54	8	4.2	216	3.6	6.4
CAMLG+RPL4	9	4.2	229	3.6	6.1
SCFD1+WDR43	6	4.2	83.5	3.3	7
SARS+TRAPPC11	9	4.2	245	3.4	6.1
COPA+SEC22B	9	4.2	255	3.5	6.1
DCAF13+TRAPPC8	9	4.2	255	3.7	6.2
DCAF13+TRAPPC5	8	4.2	226	3.3	6.4
SCFD1+SON	4	4.2	69.4	3.4	7.5
PSMD11+SEC24C	9	4.2	255	3.6	6.1
TRAPPC8+WRB	9	4.2	255	3.7	6.1
TRAPPC11+UBA3	7	4.2	177	3.6	6.7
CCT4+UGP2	9	4.2	234	3.5	6.2
VPS53+VPS54	9	4.2	230	3.5	6.1
ASNA1+TMED10	9	4.1	255	3.6	6.1
ASNA1+KDM1A	9	4.1	255	3.5	6
PSMD2+SEC23IP	9	4.1	211	2.9	6
PSMD11+TRAPPC8	9	4.1	255	3.6	6
GOLIM4+SEC22B	9	4.1	255	3.6	6
PSMD3+TRAPPC8	9	4.1	233	3.2	5.9
SPCS3+STX5	9	4.1	203	3.4	6
RRS1+TRAPPC11	7	4.1	197	3.4	6.5
PSMD2+SPATA5L1	8	4.1	28.4	3.4	7.7
SNRPD3+UBA3	3	4.1	36.3	3.4	7.7
PSMD1+SEC24C	9	4.1	255	3.6	6.1
SEC23B+WDR11	8	4.1	226	3.3	6.2
EIF3L+TRAPPC8	9	4.1	255	3.6	6
PSMD3+UGP2	9	4.1	214	3.4	6
RAB14+SEC22B	9	4.1	228	3.5	6
CAMLG+ST3GAL4	9	4.1	185	3.5	6
SPPL3+SPPL3	6	4.1	169	3.4	6.9
PSMD2+VPS54	7	4.1	102	3.1	6.8
AKAP9+SEC24C	9	4.1	255	3.7	6.1
PSMC6+UBA3	6	4.1	61.8	3.4	7.6
RPL35+TRAPPC8	9	4.1	255	3.6	6
TRAPPC3+TUBB	9	4.1	255	3.6	6
ASNA1+CCT3	8	4.1	226	3.3	6.2
MRPL51+SUCO	9	4.1	255	3.2	6.1
EIF3A+UBA3	8	4.1	34.7	3.3	7.5
SEC24A+TRAPPC5	9	4.1	255	3.7	6.1
DCTN1+TRAPPC11	8	4.1	226	3.5	6.2
EIF3H+SRPRB	9	4.1	129	3	6.1
COPB1+SEC22B	5	4.1	127	3.2	7.2
CCT4+SEC23B	9	4.1	255	3.6	6
BAG6+TRAPPC8	9	4.1	255	3.7	6.1
CAMLG+PSMC1	9	4.1	213	3.5	6
RPL4+THOC5	7	4.1	27.1	3.5	7.8
RPL4+TRAPPC8	9	4.1	255	3.7	6.1
SEC22B+WDR3	9	4.1	254	3.7	6.1
SNRPD3+SPCS3	6	4.1	104	3.2	6.9
COX7C+TRAPPC11	9	4.1	235	3.4	6
RPL35+SEC24C	9	4.1	255	3.7	6.1
HNRNPK+SEC24C	9	4.1	255	3.6	6.1
PSMC1+SEC23B	9	4.1	255	3.7	6.1
SEC24B+VPS54	9	4.1	247	3.2	6
UGP2+WDR3	9	4.1	229	3.4	6
AKAP9+TRAPPC3	9	4.1	255	3.7	6.1
SEC23B+SMC3	9	4.1	255	3.4	5.9
RPL35A+TRAPPC8	9	4.1	255	3.5	5.9
SRP54+SUCO	9	4.1	255	3.8	6.2
DCAF13+VPS53	9	4.1	225	3.6	6.1
RPL4+WDR43	5	4.1	41.6	3.3	7.4
SF3B2+TRAPPC3	9	4.1	232	3.3	6
CHAF1A+SEC23IP	9	4.1	255	3.5	6
SARS+VPS54	8	4.1	173	3.2	6.2
TRAPPC11+WRB	9	4.1	255	3.5	6
BAG6+UGP2	9	4.1	255	3.5	6
RRM1+SEC24B	8	4.1	129	3.4	6.5
RAB14+SCFD1	9	4.1	198	3	6.1
RRS1+UBR4	5	4.1	92.3	3.2	7.2
EIF3H+TRAPPC8	9	4.1	255	3.6	6
ATP5A1+EIF3A	8	4.1	28.1	3.4	7.6
SCFD1+SEC22B	9	4.1	255	3.4	5.9
PSMD3+SEC24C	9	4.1	255	3.5	6
CAMLG+SCFD1	9	4.1	246	3.6	6
SPCS3+TRAPPC5	8	4.1	226	3.6	6.3
SF3B2+UGP2	9	4.1	190	3.6	6.1
SPPL3+VPS52	9	4.1	234	3.5	6
PSMD3+SEC22B	9	4.1	255	3.5	6.1
CAMLG+PRPF39	9	4.1	255	3.7	6.1
PSMD2+SEC23B	9	4.1	255	3.6	6
EIF6+SPCS3	8	4.1	127	3	6.6
CAMLG+COG4	9	4.1	185	3.4	6
GET4+TRAPPC8	9	4.1	255	3.7	6.1
SEC23IP+UBR4	9	4.1	252	3.6	6
ASNA1+ST3GAL4	9	4.1	255	3.5	6
SF3A1+TRAPPC11	8	4.1	176	3.3	6.3
SRPRB+SUCO	9	4.1	255	3.7	6.1
CHAF1A+WDR11	6	4.1	50.7	3.5	7.8
DCTN1+HNRNPK	8	4.1	58.1	3.3	7.4
COG3+SEC22B	6	4	117	3.1	6.7
RTF1+UGP2	9	4	231	3.5	5.9
SEC24B+SPPL3	9	4	256	3.5	5.9
SEC22B+SON	8	4	227	3.3	6.1
RPL7L1+SEC22B	9	4	256	3.4	5.9
ERP44+UTP20	9	4	233	3.3	5.8
SCFD1+TRAPPC5	6	4	158	3.4	6.8
RTF1+SUCO	9	4	237	3.5	6
GET4+GET4	6	4	79	3.5	7.5
TRAPPC8+WDR43	9	4	255	3.4	5.9
ASNA1+STX5	9	4	246	3.5	6
KDM1A+SEC24C	9	4	255	3.5	5.9
EIF3A+TRAPPC8	9	4	255	3.5	5.9
KDM1A+TRAPPC3	9	4	256	3.5	5.9
SUCO+UBA3	9	4	255	3.2	5.9
ATP5B+SEC22B	8	4	216	3.5	6.2
PSMA7+SEC24C	9	4	255	3.6	6
SPCS3+TTK	7	4	153	3.3	6.4
ASNA1+PSMC1	9	4	256	3.4	5.9
CAMLG+RRM1	7	4	140	3.4	6.5
PSMC1+TRAPPC3	9	4	255	3.5	5.9
RPL7L1+TRAPPC11	8	4	227	3.4	6.1
ATP5A1+SEC24C	9	4	256	3.6	6
ANAPC2+TRAPPC8	8	4	227	3.4	6.1
ANAPC2+CAMLG	9	4	199	3.5	5.9
RPL7L1+SPCS3	9	4	181	3.2	5.9
ASNA1+SRP54	9	4	255	3.3	5.8
SRP54+UGP2	9	4	255	3.5	5.9
RPS6+SPCS3	6	4	160	3.2	6.7
CAMLG+GET4	9	4	255	3.4	5.9
DCTN1+SPCS3	8	4	204	3.3	6.1
PRPF39+TRAPPC8	9	4	255	3.3	5.8
SAMM50+VPS53	9	4	218	3.4	5.9
SCFD1+TMED10	9	4	181	3.4	6
MRPL51+VPS53	9	4	236	3.5	5.9
RTF1+SCFD1	4	4	113	3.2	7.4
TRAPPC11+TRAPPC5	8	4	227	3.6	6.3
CAMLG+CCT3	8	4	187	3.4	6.1
CCT4+DCAF13	4	4	62.1	3.2	7.5
COPB1+SUCO	6	4	153	3.2	6.7
SEC24B+SPCS3	9	4	254	3.4	5.8
AP2A1+TRAPPC11	9	4	238	3.3	5.8
COG3+SEC23B	9	4	153	3.3	5.9
HNRNPK+SEC22B	9	4	255	3.5	6
SF3A1+TRAPPC8	9	4	253	3.5	6
SUCO+WDR43	8	4	227	3.1	6.1
SGTA+TRAPPC11	9	4	255	3.2	5.9
EIF3A+VPS53	9	4	231	3.4	5.9
PSMC6+SEC22B	9	4	241	3.2	5.8
ATP5A1+UGP2	9	4	195	3.2	5.9
TRAPPC8+VCP	9	4	255	3.4	5.9
SRP54+TRAPPC11	9	4	255	3.5	5.9
RPS6+SCFD1	2	4	55.7	3.5	7.8
CHAF1A+TRAPPC8	9	4	254	3.5	5.9
STX5+VPS53	9	4	255	3.5	5.9
COX7C+SPCS3	8	4	207	3.1	6
CCT4+SF3B2	6	4	40.3	3.1	7.2
CCT3+UGP2	8	4	204	3.2	6.1
SPATA5L1+TRAPPC8	9	4	255	3.4	5.9
BAG6+SUCO	9	4	256	3.5	5.9
PPP1R8+SUCO	9	4	255	3.5	5.9
CAMLG+CHAF1A	9	4	255	3.4	5.9
ASNA1+TMED2	9	4	256	3.4	5.9
GOLIM4+TRAPPC3	9	4	255	3.4	5.9
SCFD1+TMED2	9	4	181	3.2	6.1
COPA+SPPL3	9	4	187	3.1	5.8
CAMLG+VCP	8	4	174	3.4	6.3
IFFO1+SEC24C	9	4	244	3.5	5.9
COPS4+TRAPPC8	9	4	255	3.5	5.9
PPP1R8+VPS54	9	4	211	3.3	5.9
SAMM50+TRAPPC8	9	4	255	3.5	5.9
RPL7L1+VPS53	8	4	206	3.2	6
PSMC6+RRS1	5	4	34.1	3.3	7.5
BAG6+SPCS3	9	4	238	3.3	5.9
PSMC6+TRAPPC3	9	3.9	251	3.3	5.7
PRPF39+SEC23B	9	3.9	256	3.5	5.9
PSMD1+VPS35	8	3.9	66.4	3	7
PPP1R8+SPCS3	8	3.9	227	3.3	6
SEC22B+ST3GAL4	9	3.9	255	3.3	5.8
TMED10+TRAPPC11	9	3.9	256	3.3	5.8
ASNA1+COG3	9	3.9	211	3.3	5.7
COG3+TRAPPC8	9	3.9	189	3.4	5.9
SGTA+TRAPPC8	9	3.9	256	3.5	5.8
ASNA1+COPB1	6	3.9	170	3.4	6.7
PSMB6+SEC22B	9	3.9	239	3.4	5.9
ASNA1+EIF6	9	3.9	256	3.4	5.8
VPS52+VPS53	9	3.9	217	3.4	5.8
ATP5B+UGP2	9	3.9	235	3.4	5.8
COG3+TRAPPC11	8	3.9	152	3.2	6.2
SEC24C+SMC3	9	3.9	256	3.3	5.8
PSMD2+TRAPPC8	9	3.9	256	3.3	5.6
CCT3+VPS53	7	3.9	137	3.1	6.3
EIF3D+SEC23IP	8	3.9	188	3.1	5.9
RPL4+TRAPPC11	8	3.9	167	3.1	6.1
BAG6+VPS54	8	3.9	183	2.9	6.1
VPS53+WRB	9	3.9	256	3.4	5.8
SEC22B+SPATA5L1	9	3.9	248	3.4	5.8
IFFO1+SEC23B	9	3.9	238	3.5	5.9
TRAPPC11+WDR43	8	3.9	190	3.1	6
RAB14+SEC23IP	9	3.9	256	3.5	5.8
CCT3+EIF3H	4	3.9	43.6	3.1	7.4
PSMB6+SNRPD3	2	3.9	55.8	3.4	7.8
COPS4+SPCS3	9	3.9	182	3.1	5.7
DCAF13+SCFD1	6	3.9	170	3.1	6.6
TRAPPC11+UBR4	8	3.9	227	3.4	6.1
SARS+UGP2	9	3.9	236	3.3	5.8
SAMM50+VPS54	8	3.9	206	3.3	6.1
PPP1R8+TRAPPC11	9	3.9	256	3.3	5.7
BAG6+SPPL3	9	3.9	256	3.3	5.7
ST3GAL4+TRAPPC3	9	3.9	226	3.3	5.8
ERP44+RTF1	9	3.9	235	3.3	5.8
DCAF13+TRAPPC11	9	3.9	255	3.1	5.8
MRPL54+TRAPPC8	9	3.9	256	3.4	5.8
NAA25+VPS53	9	3.9	224	3.2	5.8
ERP44+RPL4	9	3.9	256	3.2	5.7
DCAF13+SEC22B	9	3.9	256	3.4	5.6
SPCS3+SRPRB	7	3.9	196	3.3	6.3
PSMD1+TRAPPC3	9	3.9	256	3.3	5.8
SGTA+UGP2	9	3.9	237	3.2	5.7
PTPN1+SEC23B	9	3.9	256	3.4	5.8
MYBL2+VPS53	9	3.9	246	3.3	5.7
COPB1+ERP44	6	3.9	119	3.3	6.7
ERP44+SON	9	3.9	163	2.7	5.8
CAMLG+GOLIM4	9	3.9	200	3.4	5.8
SUCO+WRB	9	3.9	256	3.4	5.8
BAG6+TRAPPC11	8	3.9	227	3.4	6
SF3A1+UGP2	9	3.9	253	3.3	5.7
CAMLG+WDR11	8	3.9	186	3.4	6.1
TRAPPC8+TUBB	9	3.9	256	3.5	5.9
ERP44+SNRPD3	9	3.9	167	3.2	5.8
WDR3+WRB	9	3.9	61.4	3	7
EIF3A+SARS	8	3.9	37.5	3	7.2
DCAF13+UGP2	9	3.9	240	3.2	5.7
SEC22B+WDR11	7	3.9	173	3.4	6
EIF6+TRAPPC3	9	3.9	233	3.3	5.8
EIF3A+UGP2	9	3.9	225	3.2	5.8
ASNA1+PSMB6	7	3.9	178	3.3	6.3
SCFD1+SCFD1	3	3.9	84.2	3.3	6.9
SEC24A+UBR4	9	3.9	241	3.2	5.7
MRPL51+SF3A1	6	3.9	82.3	3	7
EIF3L+VPS53	9	3.9	256	3.5	5.9
COG4+TRAPPC3	9	3.9	225	3	5.7
CHAF1A+TRAPPC11	7	3.9	192	3.1	6.3
SMC3+SPATA5L1	8	3.9	57.1	3	7.2
MRPL51+TMED10	9	3.9	29.9	3.2	7.6
SEC23IP+SEC24B	9	3.9	256	3.6	5.8
DCTN1+ERP44	9	3.9	256	3.4	5.8
CCNA2+TRAPPC3	9	3.9	192	3.3	5.7
CAMLG+MGAT5	9	3.9	180	3.2	5.8
CHAF1A+SUCO	9	3.9	230	3.3	5.8
RRM1+SUCO	9	3.9	256	3.3	5.7
STX5+SUCO	9	3.9	256	3.5	5.8
UBA3+VPS54	5	3.9	132	3.3	7
SPCS3+UBR4	8	3.9	207	3.2	5.9
RPL4+UGP2	9	3.9	232	3.3	5.8
ERP44+RAB14	9	3.9	256	3.4	5.7
RPL7L1+TRAPPC8	9	3.8	250	3.3	5.5
MRPL51+SEC23IP	9	3.8	256	3.2	5.5
CCT3+RPL35	8	3.8	52.1	2.8	6.3
PSMC6+TRAPPC8	9	3.8	256	3.2	5.5
PSMD11+TRAPPC5	8	3.8	198	3.3	5.8
PSMA7+TRAPPC11	8	3.8	187	3	5.9
DCTN1+SAMM50	7	3.8	118	2.8	6.2
PSMD11+VPS53	8	3.8	189	3.2	6
DCAF13+SPCS3	7	3.8	124	3	6
COPA+SUCO	9	3.8	226	3.1	5.7
PSMC1+SEC24C	9	3.8	256	3.3	5.6
SON+VPS53	9	3.8	197	3.2	5.6
ATP5B+TRAPPC8	9	3.8	256	3.4	5.7
SRPRB+UGP2	9	3.8	239	3.3	5.7
ASNA1+PSMC6	9	3.8	256	3.3	5.7
COPA+SPCS3	7	3.8	133	3.1	6.1
DCAF13+SUCO	9	3.8	256	3.3	5.7
EIF3D+TRAPPC11	7	3.8	176	3.3	6
IFFO1+TRAPPC8	9	3.8	255	3.1	5.6
ERP44+STX5	9	3.8	256	3.3	5.5
PSMC1+SEC22B	9	3.8	256	3.4	5.6
SAMM50+SUCO	9	3.8	230	3.2	5.6
STX5+WDR43	9	3.8	49	3	6.6
RRS1+VPS53	9	3.8	215	3.4	5.6
EIF6+SPPL3	9	3.8	153	2.9	5.6
VPS53+WDR3	8	3.8	227	3.1	5.9
EIF3L+TRAPPC11	9	3.8	236	3.3	5.7
COG3+VPS53	8	3.8	178	3	5.8
ANAPC2+VPS54	7	3.8	138	2.9	6.2
ERP44+NAA25	9	3.8	165	2.6	5.7
RAB14+TRAPPC11	9	3.8	256	3.4	5.6
EIF3D+TRAPPC8	9	3.8	231	3.3	5.7
RPL35+TRAPPC11	9	3.8	234	3.2	5.6
COPS4+DCTN1	9	3.8	108	2.6	6.2
VCP+VPS53	9	3.8	227	3.2	5.7
RRS1+SEC22B	7	3.8	199	3.1	6.2
DCTN1+TRAPPC5	9	3.8	181	3.1	5.6
TRAPPC5+WRB	9	3.8	235	3	5.7
TMED2+TRAPPC11	9	3.8	238	3.2	5.7
RRS1+UGP2	9	3.8	220	3.3	5.7
ERP44+SRPRB	9	3.8	226	3.3	5.7
COPB1+TRAPPC8	5	3.8	141	3.3	6.4
CHAF1A+SPPL3	9	3.8	235	3.2	5.7
ERP44+SCFD1	9	3.8	256	3.4	5.6
PSMB6+SEC23IP	9	3.8	234	3.1	5.5
SEC23IP+SPATA5L1	9	3.8	222	3.1	5.7
PSMD11+TRAPPC11	9	3.8	247	3.3	5.6
CCT4+TRAPPC8	9	3.8	230	3.2	5.7
PSMD3+VPS53	8	3.8	192	3.2	5.7
BAG6+ERP44	9	3.8	256	3.4	5.6
TRAPPC8+WDR11	8	3.8	223	3	5.9
CAMLG+SF3A1	9	3.8	214	3.3	5.5
STX5+VPS35	9	3.8	42.6	2.9	6.5
CAMLG+TMED2	9	3.8	182	3.3	5.6
SPPL3+VPS35	9	3.8	208	3.2	5.7
ATP5A1+VPS52	9	3.8	122	2.4	5.8
PSMD3+SEC24B	9	3.8	56	2.4	5.9
RAB14+VPS53	9	3.8	231	3.2	5.7
PSMA7+TRAPPC8	9	3.8	256	3.3	5.7
SARS+SPPL3	9	3.8	245	3.3	5.7
ERP44+RRS1	9	3.8	235	3.2	5.6
SMC3+VPS53	9	3.8	131	3.1	5.8
EIF3H+TRAPPC11	9	3.8	214	3.3	5.7
SPATA5L1+UGP2	9	3.8	201	3.2	5.8
MRPL54+RPL7L1	8	3.8	51.6	2.8	6.3
RPL4+SUCO	9	3.8	256	3	5.7
GET4+TRAPPC11	9	3.8	256	3.2	5.5
VPS53+WDR11	7	3.8	158	3	5.9
CAMLG+COG3	9	3.8	175	3.3	5.8
SCFD1+VPS52	8	3.8	198	3.2	6
ERP44+PPP1R8	9	3.8	256	3.3	5.5
CCNA2+SEC24C	9	3.8	256	3.2	5.6
ASNA1+COG4	9	3.8	238	3.2	5.5
TRAPPC11+TUBB	9	3.8	239	3	5.6
MRPL51+TRAPPC11	9	3.8	232	3.2	5.5
NAA25+SEC24B	9	3.8	49.5	2.5	6.2
CAMLG+KDM1A	9	3.8	247	3.2	5.5
ATP5B+SAMM50	2	3.8	26.3	3.4	7
ASNA1+SGTA	9	3.8	218	2.9	5.6
SAMM50+SCFD1	5	3.8	141	3.1	6.4
AP1M1+CAMLG	9	3.7	184	3.1	5.5
ASNA1+SMC3	9	3.7	234	3	5.4
SF3A1+VPS52	7	3.7	109	2.8	6
DCTN1+STX5	9	3.7	136	3	5.7
ASNA1+PTPN1	9	3.7	257	3.3	5.5
SF3A1+WDR43	7	3.7	55.6	2.8	6.3
UBA3+UGP2	9	3.7	237	3	5.6
RRM1+TRAPPC11	9	3.7	229	3.1	5.4
EIF6+UGP2	9	3.7	158	2.9	5.5
RPL7L1+UGP2	9	3.7	213	2.8	5.6
ATP5A1+NAA25	9	3.7	56.1	2.8	6.5
CHAF1A+UGP2	9	3.7	197	2.9	5.6
RRS1+SUCO	9	3.7	256	3.2	5.6
RPL4+SF3B2	3	3.7	26.5	3.2	7
SUCO+VPS35	9	3.7	236	3.3	5.5
CCT4+DCTN1	6	3.7	62.5	3.1	6.6
SPCS3+VPS52	8	3.7	207	3.2	5.7
SUCO+TMED2	9	3.7	257	3.2	5.4
RAB14+UGP2	9	3.7	256	3.3	5.5
CAMLG+DCAF13	9	3.7	256	3.1	5.4
VPS52+WDR43	8	3.7	134	2.8	5.7
ANAPC2+SCFD1	7	3.7	149	2.9	5.9
SNRPD3+TRAPPC5	8	3.7	156	2.6	5.7
SARS+TRAPPC5	9	3.7	223	3.1	5.6
DCAF13+MRPL51	9	3.7	56.4	2.3	5.7
EIF6+PSMD3	7	3.7	31.7	3	6.7
RPS6+SPPL3	9	3.7	231	3	5.4
VCP+VPS52	6	3.7	96.5	3.1	6.2
SPATA5L1+TRAPPC11	9	3.7	196	3	5.5
GET4+VPS53	9	3.7	233	3.2	5.6
ERP44+SRP54	9	3.7	257	3.3	5.5
COX7C+ERP44	9	3.7	244	3.2	5.6
RTF1+SPCS3	7	3.7	147	3.1	5.9
DCTN1+RAB14	9	3.7	118	2.9	5.5
SUCO+TTK	8	3.7	207	3.1	5.6
GET4+SUCO	9	3.7	257	3.3	5.4
COPB1+SEC23IP	6	3.7	161	3.2	6.1
CCNA2+SEC23B	9	3.7	224	3.2	5.4
RAB14+SPCS3	9	3.7	232	3.1	5.4
MRPL54+SRPRB	8	3.7	95.7	2.7	6.2
COPA+DCTN1	4	3.7	24.6	3.2	7
MYBL2+SUCO	9	3.7	257	3.1	5.4
ATP5B+VPS52	6	3.7	120	3.1	6.2
CCT3+ERP44	9	3.7	256	2.9	5.5
CAMLG+TMED10	9	3.7	194	3.3	5.5
AKAP9+TRAPPC8	9	3.7	256	3.3	5.5
SCFD1+SRP54	9	3.7	193	3.2	5.6
SMC3+TRAPPC8	9	3.7	170	3.1	5.4
SARS+UBA3	6	3.7	88.2	2.8	6.4
DCTN1+RPL35	9	3.7	56.3	3	6.4
SF3B2+TRAPPC8	9	3.7	256	3.3	5.5
IFFO1+SUCO	9	3.7	200	3.1	5.5
ATP5B+SPPL3	9	3.7	198	3	5.5
SPCS3+UTP20	8	3.7	228	2.9	5.6
ASNA1+MGAT5	9	3.7	247	3	5.5
VPS54+WRB	9	3.7	228	2.8	5.4
PRPF39+VPS53	9	3.7	256	3.2	5.5
COX7C+SUCO	9	3.7	256	3.2	5.6
EIF6+SMC3	6	3.7	34	3	6.7
DCTN1+PSMD11	7	3.7	97.7	3	6
GOLIM4+VPS53	9	3.7	201	3.1	5.4
SON+STX5	9	3.7	97.1	2.5	5.8
DCTN1+EIF3L	9	3.7	85.4	2.9	6.3
SEC23IP+UTP20	9	3.7	256	3.2	5.6
TRAPPC5+VPS52	8	3.7	205	3.2	5.7
SF3A1+SUCO	8	3.7	205	3.1	5.6
MRPL51+UGP2	9	3.7	199	3	5.5
AKAP9+SEC23B	9	3.7	257	3.2	5.4
GOLIM4+TRAPPC8	9	3.7	257	3.3	5.5
EIF3H+SCFD1	6	3.7	170	3	6.1
CHAF1A+SPCS3	8	3.7	206	3	5.6
THOC5+UGP2	9	3.7	158	3	5.5
BAG6+WRB	9	3.7	62.6	2.5	6
PPP1R8+VPS35	8	3.7	111	2.8	6
BAG6+SEC23IP	9	3.7	256	3.3	5.5
SPPL3+STX5	9	3.7	241	3.1	5.4
DCTN1+SPPL3	9	3.7	256	3.2	5.5
VPS53+VPS53	6	3.7	170	3.1	6.1
MRPL54+SCFD1	8	3.6	149	3	5.5
NAA25+TRAPPC8	9	3.6	257	3.1	5.3
ARL1+RRS1	7	3.6	55.1	2.8	6.5
BAG6+CHAF1A	8	3.6	54.7	2.4	5.9
RPS6+SEC23IP	9	3.6	236	3.1	5.3
ARL1+VPS53	8	3.6	163	3.1	5.6
AKAP9+SAMM50	9	3.6	22.5	3	6.9
ERP44+UBA3	9	3.6	247	2.9	5.3
COPA+TRAPPC11	7	3.6	158	2.8	5.7
DCTN1+RPL7L1	9	3.6	114	2.8	5.7
RPL35A+SPPL3	9	3.6	227	2.9	5.3
ERP44+IFFO1	9	3.6	185	2.8	5.4
RTF1+SEC23IP	9	3.6	239	3	5.3
MYBL2+PSMD1	6	3.6	34.2	2.9	6.7
PTPN1+SEC24C	9	3.6	257	3.1	5.3
ERP44+PSMB6	9	3.6	204	3.1	5.4
UBR4+VPS35	8	3.6	118	2.6	5.6
CHAF1A+IFFO1	8	3.6	71.8	2.7	6.3
STX5+UBR4	9	3.6	181	3	5.5
PSMD11+SUCO	9	3.6	256	3.1	5.3
EIF6+TRAPPC11	7	3.6	142	2.8	5.9
HNRNPK+SF3B2	6	3.6	23.1	3.1	7
SARS+UTP20	4	3.6	64.9	2.9	6.6
PSMB6+UGP2	9	3.6	185	3	5.4
SEC24A+STX5	9	3.6	257	3	5.3
COG4+SEC23B	9	3.6	257	3	5.3
SMC3+TRAPPC11	8	3.6	142	2.6	5.8
SEC24C+WDR11	9	3.6	257	3.1	5.3
DCTN1+SEC24B	9	3.6	117	2.6	5.4
SAMM50+UBR4	6	3.6	125	2.9	6.1
CCT3+SRPRB	7	3.6	93.5	2.7	6.2
RPL4+SPPL3	9	3.6	219	3	5.4
MRPL54+MRPL54	6	3.6	83.3	2.6	6.1
ASNA1+SON	9	3.6	227	3.1	5.3
KDM1A+SUCO	9	3.6	256	3	5.4
ATP5A1+ERP44	9	3.6	257	3	5.3
COPS4+SCFD1	9	3.6	191	3	5.3
AP2A1+VPS53	9	3.6	256	3	5.4
ATP5A1+TRAPPC8	9	3.6	257	3.2	5.4
DCTN1+RPL35A	7	3.6	82.9	2.8	6.3
EIF3H+TUBB	9	3.6	22.7	3	6.9
CCT4+TRAPPC11	7	3.6	166	2.9	5.7
SF3B2+VPS53	9	3.6	257	3.1	5.3
PSMD2+TTK	6	3.6	50.3	2.7	6.4
PRPF39+SEC24C	9	3.6	257	3.1	5.3
PSMC1+VPS53	9	3.6	234	3.1	5.4
ERP44+PSMD11	9	3.6	224	2.9	5.3
EIF3A+VPS54	7	3.6	114	2.7	5.9
PSMA7+SPPL3	9	3.6	215	2.9	5.4
PSMC1+SUCO	9	3.6	257	3.1	5.3
GET4+SPCS3	9	3.6	256	3.1	5.4
IFFO1+VPS54	9	3.6	145	2.4	5.6
PSMD3+TRAPPC11	9	3.6	173	2.7	5.4
CCT3+SPPL3	8	3.6	171	2.9	5.6
SAMM50+SPCS3	7	3.6	151	2.7	5.7
COG4+RRM1	7	3.6	93.4	2.6	6.1
GET4+UGP2	9	3.6	238	3.2	5.4
ANAPC2+SPCS3	9	3.6	233	2.9	5.3
MRPL51+RPL4	8	3.6	62.3	2.4	5.8
SUCO+VCP	9	3.6	257	3.1	5.3
COPS4+VPS53	9	3.6	240	3.2	5.4
MRPL51+SCFD1	7	3.6	179	3	5.8
EIF3D+VPS53	9	3.6	257	3.1	5.4
SCFD1+THOC5	7	3.6	135	2.7	5.8
SEC23IP+VCP	9	3.6	257	3	5.3
RPL35+SCFD1	9	3.6	175	2.8	5.5
SUCO+TMED10	9	3.6	257	3.2	5.3
DCAF13+SF3B2	6	3.6	47.6	2.8	6.5
NAA25+PTPN1	9	3.6	29.1	2.9	6.7
SGTA+VPS53	9	3.6	216	3.2	5.4
KDM1A+VPS53	8	3.6	227	3.1	5.6
SPPL3+WDR3	9	3.6	207	2.8	5.4
EIF3H+SUCO	9	3.6	257	3.1	5.3
CAMLG+STX5	9	3.6	211	3.2	5.4
HNRNPK+TRAPPC3	9	3.6	248	3.1	5.3
SEC24A+SNRPD3	9	3.6	109	2.3	5.6
RPL4+RPS6	1	3.6	27.8	3.2	7
SNRPD3+VPS54	4	3.6	104	2.9	6.5
RRS1+SPPL3	9	3.6	256	3.2	5.5
RPL35+VPS53	9	3.6	257	3.2	5.4
ANAPC2+SUCO	9	3.6	256	3.1	5.4
SNRPD3+UGP2	9	3.6	190	2.9	5.4
HNRNPK+RTF1	6	3.6	30.2	3	6.8
AP2A1+CCNA2	8	3.6	23.1	3.1	6.9
ERP44+SARS	9	3.6	251	3	5.4
BAG6+SCFD1	9	3.6	203	3	5.4
SEC23IP+WRB	9	3.6	257	3	5.3
PSMC6+TRAPPC11	9	3.6	127	3	5.5
COG3+UGP2	9	3.6	137	3	5.4
PSMC6+TRAPPC5	9	3.5	133	2.3	5.2
TRAPPC5+UBR4	8	3.5	185	3	5.5
ATP5B+SCFD1	4	3.5	104	2.8	6.4
SF3A1+VPS53	7	3.5	171	2.8	5.7
PSMC1+TRAPPC11	9	3.5	178	2.8	5.2
GOLIM4+SEC24C	9	3.5	257	3.1	5.2
RRM1+TRAPPC5	7	3.5	109	2.7	5.7
RPS6+TRAPPC11	8	3.5	177	2.9	5.5
MYBL2+TRAPPC5	7	3.5	135	2.6	6
SF3B2+TRAPPC11	7	3.5	199	3	5.7
WRB+WRB	5	3.5	62.5	2.8	6.6
SPPL3+SRPRB	9	3.5	237	3	5.2
KDM1A+TRAPPC11	8	3.5	207	2.9	5.5
COX7C+SCFD1	8	3.5	163	3	5.4
GET4+SEC23IP	9	3.5	257	3	5.2
UBR4+VPS53	8	3.5	228	3.1	5.5
PSMC1+TRAPPC8	9	3.5	258	3	5.1
RTF1+SPPL3	9	3.5	235	3	5.2
CCNA2+TRAPPC11	9	3.5	181	2.9	5.4
CCT3+SF3B2	3	3.5	38.8	2.8	6.7
PSMA7+SUCO	9	3.5	257	3.1	5.2
COPB1+SPPL3	6	3.5	150	2.9	6
COPA+VPS53	8	3.5	201	3	5.4
DCAF13+SPPL3	9	3.5	257	3.1	5.3
CCNA2+RPS6	7	3.5	69.7	2.6	6.2
PSMD2+SEC24C	9	3.5	257	3	5.2
COX7C+SPPL3	9	3.5	240	2.9	5.2
SPATA5L1+SPCS3	8	3.5	164	2.9	5.4
RPS6+SEC24A	8	3.5	164	2.6	5.4
SEC24B+TRAPPC5	9	3.5	257	2.9	5.2
ATP5B+SUCO	9	3.5	257	3	5.2
PSMD1+VCP	6	3.5	23.7	3	6.9
SEC23IP+WDR3	9	3.5	237	3	5.2
TUBB+VPS53	9	3.5	238	3	5.3
DCTN1+RRM1	9	3.5	109	2.7	5.8
TMED10+VPS53	9	3.5	230	3	5.2
ST3GAL4+TRAPPC8	9	3.5	257	2.9	5.2
CCT4+SPPL3	9	3.5	244	2.8	5.2
RPL35A+UBR4	7	3.5	93.1	2.3	5.8
EIF3D+UGP2	9	3.5	182	3	5.3
SARS+SPCS3	8	3.5	209	2.9	5.4
RRS1+SEC24A	9	3.5	135	2.8	5.3
CHAF1A+SCFD1	6	3.5	121	2.9	6
MRPL54+VPS53	9	3.5	257	3.1	5.3
VPS54+VPS54	3	3.5	84.1	3	6.7
TRAPPC5+WDR3	9	3.5	191	2.9	5.2
GOLIM4+SEC23B	9	3.5	257	3.1	5.2
COX7C+DCTN1	9	3.5	93	2.9	5.7
DCTN1+SRP54	9	3.5	127	2.9	5.5
SEC24B+VPS52	9	3.5	257	3	5.2
ATP5B+SEC23IP	9	3.5	236	2.9	5.2
SON+TRAPPC5	8	3.5	135	2.9	5.6
ASNA1+CCNA2	9	3.5	234	2.9	5.2
MRPL54+SPCS3	9	3.5	192	3	5.3
SEC24A+VCP	9	3.5	220	2.9	5.2
SPCS3+UBA3	7	3.5	200	3	5.7
DCTN1+VPS54	8	3.5	167	2.3	5.4
EIF3A+SPCS3	9	3.5	137	2.8	5.3
ARL1+SEC24C	9	3.5	257	2.9	5.2
SON+TRAPPC11	6	3.5	143	2.6	5.8
ANAPC2+ERP44	9	3.5	235	2.9	5.2
AP1M1+ASNA1	9	3.5	199	2.8	5.2
ATP5A1+VPS53	9	3.5	257	3	5.2
COG4+TRAPPC8	9	3.5	234	2.8	5.2
ATP5A1+RRS1	8	3.5	65.4	2.6	6.2
MRPL54+TTK	8	3.5	76	2.6	5.6
SEC24C+ST3GAL4	9	3.5	257	3.1	5.3
PPP1R8+SPPL3	9	3.5	257	2.9	5.2
TRAPPC11+WDR3	8	3.5	203	3.1	5.5
DCTN1+PSMD3	8	3.5	86.8	2.7	6
RPL35A+SUCO	9	3.5	257	2.9	5.1
SEC24A+VPS52	9	3.5	224	3.2	5.3
TTK+VPS53	7	3.5	177	2.9	5.6
SPATA5L1+SRPRB	8	3.5	125	2.6	5.7
AP2A1+SPPL3	9	3.5	220	2.8	5.2
PRPF39+SCFD1	8	3.5	165	2.9	5.4
RPL35A+SEC23IP	9	3.5	247	3	5.2
RRM1+SPCS3	6	3.5	154	3	6
SAMM50+SPPL3	9	3.5	225	2.9	5.2
KDM1A+SPCS3	9	3.5	212	2.9	5.2
SPPL3+WRB	9	3.4	258	2.9	5
MRPL54+SPPL3	9	3.4	255	2.9	5.1
SRP54+VPS54	9	3.4	222	2.8	5.2
EIF3A+STX5	9	3.4	90.4	2.6	5.7
ERP44+ERP44	6	3.4	171	2.9	5.8
RAD21+SEC22B	8	3.4	208	2.7	5.3
MRPL54+UGP2	9	3.4	220	2.9	5.1
SNRPD3+SPPL3	8	3.4	161	2.7	5.2
PRPF39+TRAPPC11	9	3.4	229	2.8	5.2
EIF3L+SPCS3	9	3.4	217	2.9	5.1
ANAPC2+DCTN1	9	3.4	88.9	2.7	5.7
SPCS3+WDR3	7	3.4	154	2.8	5.7
PSMD2+SUCO	9	3.4	257	2.8	5.1
ATP5A1+SCFD1	9	3.4	194	2.8	5
ERP44+RPL7L1	9	3.4	226	3	5.2
CAMLG+CCNA2	9	3.4	216	2.7	5.1
EIF3A+SPATA5L1	8	3.4	28.9	2.8	6.8
UBR4+VPS52	8	3.4	155	3	5.2
TRAPPC5+UTP20	5	3.4	137	2.5	6.1
COPA+SEC23IP	9	3.4	228	2.8	5.1
RPL35+UGP2	9	3.4	205	2.9	5.1
EIF3L+UGP2	9	3.4	194	3	5.2
ANAPC2+COX7C	8	3.4	51.3	2.5	6.3
PSMC1+SPCS3	9	3.4	235	2.7	5.1
SEC23IP+TTK	9	3.4	257	2.9	5.1
DCTN1+PTPN1	9	3.4	61.4	2.8	6.2
RRS1+VPS54	5	3.4	133	2.7	6.1
SPCS3+THOC5	8	3.4	111	2.7	5.3
CCT3+TRAPPC5	7	3.4	148	2.9	5.7
ASNA1+RAD21	9	3.4	239	2.8	5.1
SARS+SEC23IP	9	3.4	258	2.9	5.1
SNRPD3+TRAPPC11	8	3.4	203	2.9	5.4
RPL7L1+SUCO	9	3.4	258	2.9	5
PPP1R8+WDR43	9	3.4	57.1	2.1	5.7
TRAPPC5+TTK	7	3.4	169	2.7	5.5
SGTA+SPCS3	9	3.4	194	2.8	5
PSMD1+UGP2	9	3.4	173	2.6	5.1
ERP44+RPS6	9	3.4	257	2.8	5.1
MRPL54+SUCO	9	3.4	258	2.9	5.1
EIF3A+TRAPPC11	8	3.4	165	2.7	5.3
RAD21+RRS1	8	3.4	29.9	2.6	6.6
MYBL2+VPS52	8	3.4	139	2.6	5.3
TMED2+VPS53	9	3.4	239	2.9	5.2
AP2A1+SEC23IP	9	3.4	258	2.9	5.1
COPS4+TRAPPC11	9	3.4	258	2.9	5
RPL35A+TRAPPC5	7	3.4	133	2.4	5.6
SPPL3+TTK	9	3.4	219	2.8	5.1
SPATA5L1+WRB	9	3.4	56.9	2.5	6.2
MRPL51+PSMB6	7	3.4	62.2	2.1	5.6
CCT4+TRAPPC5	8	3.4	143	2.9	5.3
COG4+VPS53	9	3.4	177	2.8	5.3
SUCO+TUBB	9	3.4	257	2.9	5.1
MRPL51+SON	6	3.4	80.3	2.5	6.3
ERP44+WDR43	9	3.4	215	2.8	5.1
RTF1+SAMM50	4	3.4	44.1	2.6	6.5
SEC24B+TTK	8	3.4	73.2	2.5	5.4
ATP5A1+VPS54	9	3.4	246	2.9	5.1
PSMD1+SUCO	9	3.4	236	2.8	5
PSMD3+SEC23IP	9	3.4	258	2.8	5.1
ERP44+WRB	9	3.4	257	3	5.1
KDM1A+VPS54	8	3.4	130	2.6	5.3
SARS+SRPRB	7	3.4	114	2.5	5.8
SEC23IP+SF3B2	9	3.4	246	3	5.1
TRAPPC5+VPS35	9	3.4	257	3	5.1
BAG6+UBA3	6	3.4	28.2	2.7	5.9
ERP44+GET4	9	3.4	258	2.9	5.1
CAMLG+SMC3	9	3.4	159	2.8	5.2
DCTN1+EIF3D	7	3.4	88.1	2.8	5.6
IFFO1+PSMD3	9	3.4	37.3	2.6	6.6
RAB14+SPPL3	9	3.4	257	3	5.2
RAB14+SEC24A	9	3.4	258	3	5.1
COPS4+TRAPPC5	9	3.4	220	2.9	5.2
SEC24B+UBR4	9	3.4	206	2.8	5.2
SPCS3+VCP	6	3.4	97	2.9	6
ARL1+SPATA5L1	9	3.4	24.7	2.7	5.9
CCNA2+SARS	8	3.4	25.9	2.8	6
RPL4+SPCS3	6	3.4	153	2.7	5.8
RRS1+TRAPPC5	8	3.4	145	2.8	5.3
DCTN1+TMED10	9	3.4	97.5	2.9	5.5
COPB1+TTK	1	3.4	27.9	3	6
AP2A1+SUCO	9	3.4	257	2.9	5.1
ERP44+SAMM50	9	3.3	242	2.8	5
CCT4+VPS53	8	3.3	229	2.8	5
EIF3D+TUBB	8	3.3	50.3	2.1	5.8
SEC23IP+SEC23IP	6	3.3	171	2.8	5.3
BAG6+SRPRB	9	3.3	116	2.7	5.2
DCTN1+TUBB	9	3.3	92.5	2.5	5.4
PSMA7+SEC23IP	9	3.3	258	2.8	5
RPL35A+SPCS3	7	3.3	199	2.7	5.2
COPB1+TMED10	6	3.3	59.3	2.6	5.6
PSMD3+TRAPPC5	9	3.3	123	2.6	5.2
PSMD11+VPS54	6	3.3	126	2.7	5.4
ERP44+PSMD3	9	3.3	241	2.7	4.8
CCT4+STX5	9	3.3	100	2.5	5.5
EIF3A+SEC24A	9	3.3	191	2.6	4.8
EIF3D+SUCO	9	3.3	258	2.9	5.1
COPB1+VPS53	4	3.3	60.6	2.6	5.7
ERP44+VCP	9	3.3	241	2.9	4.9
MYBL2+SPCS3	8	3.3	183	2.7	5
RAB14+TRAPPC5	9	3.3	226	2.8	4.8
ATP5A1+TRAPPC11	9	3.3	241	2.8	5
NAA25+SAMM50	5	3.3	39.9	2.5	5.7
ATP5B+SEC24A	9	3.3	150	2.6	5.2
VPS52+VPS54	7	3.3	172	2.8	5.2
SPCS3+WRB	9	3.3	219	2.8	5
PSMB6+VPS54	3	3.3	42.5	2.7	5.9
ANAPC2+SF3B2	6	3.3	24.9	2.8	6
ARL1+TRAPPC11	9	3.3	167	2.7	5
COX7C+TRAPPC5	9	3.3	201	2.5	5.1
MYBL2+SRP54	9	3.3	70.7	2	5.4
EIF3D+TRAPPC5	7	3.3	111	2.6	5.4
COPS4+SPPL3	9	3.3	258	2.8	4.8
RPL35A+VPS53	9	3.3	238	2.8	5
PSMD11+SPPL3	9	3.3	200	2.8	5.1
SRPRB+TRAPPC5	9	3.3	246	2.7	5
THOC5+VPS53	9	3.3	232	2.8	5
PTPN1+TRAPPC8	9	3.3	237	2.8	4.9
EIF6+VPS52	7	3.3	38.5	2.4	5.7
STX5+TRAPPC5	9	3.3	253	2.9	5
MRPL51+VPS52	9	3.3	161	2.7	4.9
SGTA+SPPL3	9	3.3	258	2.8	4.9
DCTN1+SARS	7	3.3	87.2	2.7	5.4
EIF3D+ERP44	9	3.3	222	2.8	4.8
SCFD1+SNRPD3	4	3.3	114	2.8	5.7
CCNA2+VPS53	9	3.3	249	2.9	4.9
THOC5+TRAPPC11	9	3.3	182	2.7	5
SF3A1+UBR4	6	3.3	86.1	2.4	5.5
SAMM50+STX5	9	3.3	80.9	2.5	5.2
SAMM50+UBA3	6	3.3	142	2.8	5.4
MYBL2+VPS54	7	3.3	125	2.5	5.4
PSMD11+RRM1	3	3.3	61.6	2.6	5.8
PSMC6+SEC24C	9	3.3	258	2.9	4.9
SEC23IP+SGTA	9	3.3	258	3	4.9
PSMD3+SPCS3	6	3.3	111	2.5	5.3
SGTA+SUCO	9	3.3	258	3	5.1
SMC3+TRAPPC3	9	3.3	211	2.7	4.8
RTF1+TRAPPC5	9	3.3	194	2.8	5.1
RPL4+SEC23IP	9	3.3	235	2.8	4.9
UTP20+WDR11	6	3.3	25.9	2.7	5.9
AP2A1+ERP44	9	3.3	258	2.8	5
AKAP9+TRAPPC11	9	3.3	188	2.8	5
CAMLG+SGTA	9	3.3	219	2.8	5
MGAT5+TRAPPC3	9	3.3	169	2.5	5.1
PSMC6+VPS53	9	3.3	163	2.6	5.1
STX5+VPS52	9	3.3	237	2.8	5
COPB1+SPATA5L1	2	3.3	39.3	2.8	6
PRPF39+SPPL3	9	3.3	219	2.8	5
COG4+SEC22B	9	3.3	257	2.8	5
SUCO+THOC5	9	3.3	239	2.8	5
PSMA7+TRAPPC5	8	3.3	197	2.7	5.2
DCAF13+PPP1R8	8	3.3	138	2.4	5.2
RPL35+SUCO	9	3.3	258	2.8	4.9
TUBB+UGP2	9	3.3	213	2.7	5
CCT3+SPCS3	7	3.3	112	2.8	5.2
COPA+ERP44	9	3.3	224	2.8	4.9
PSMD11+SEC23IP	9	3.3	258	2.7	5
TRAPPC11+WDR11	8	3.3	115	2.4	5.3
GET4+TRAPPC5	9	3.3	215	2.7	5
EIF3H+ERP44	9	3.3	245	2.8	5.1
COPS4+SUCO	9	3.3	258	3	4.9
SARS+STX5	9	3.2	63.4	2.1	5.3
RPL35A+TRAPPC11	8	3.2	188	2.6	5.1
ATP5A1+VCP	9	3.2	62.9	1.7	4.9
SPPL3+SRP54	9	3.2	259	2.8	4.8
EIF3L+SUCO	9	3.2	259	2.8	4.7
EIF3H+UGP2	9	3.2	190	2.7	4.7
EIF3A+SPPL3	9	3.2	209	2.7	4.9
DCTN1+SMC3	9	3.2	76.4	2.3	5.4
RRM1+SEC23IP	9	3.2	258	2.7	4.7
RAB14+RRS1	9	3.2	68.6	2.3	5.5
ARL1+SUCO	9	3.2	152	2.2	4.9
ERP44+PSMD1	9	3.2	183	2.7	4.8
PPP1R8+TRAPPC5	9	3.2	236	2.7	4.7
COG4+VPS52	9	3.2	53.9	2.1	5.4
CHAF1A+STX5	9	3.2	83.5	2.5	5.1
SON+VPS52	8	3.2	115	2.2	5
HNRNPK+TRAPPC8	9	3.2	248	2.8	4.8
DCTN1+SNRPD3	6	3.2	41.9	2.4	5.7
KDM1A+UGP2	9	3.2	193	2.7	4.9
COX7C+UGP2	9	3.2	218	2.7	4.9
DCAF13+RAB14	9	3.2	46.5	1.9	5.3
GET4+SPPL3	9	3.2	244	2.7	4.7
EIF3H+VPS54	4	3.2	85.4	2.6	5.7
RPL35+SPCS3	9	3.2	200	2.7	4.9
PSMC1+UGP2	9	3.2	165	2.6	5
ATP5B+UTP20	1	3.2	28	2.8	6
COX7C+VPS54	9	3.2	146	2.2	5
SPATA5L1+SPPL3	9	3.2	172	2.7	4.8
SRP54+TRAPPC5	9	3.2	238	2.8	4.8
ERP44+RRM1	9	3.2	205	2.5	5
COPB1+SF3A1	1	3.2	28	2.8	6
CAMLG+COPB1	6	3.2	141	2.8	5.5
SEC23IP+SF3A1	9	3.2	258	2.7	4.7
CCT4+SEC23IP	9	3.2	257	2.6	4.9
EIF3D+THOC5	8	3.2	26.9	2.6	5.9
SARS+UBR4	8	3.2	151	2.4	4.9
SCFD1+SPATA5L1	6	3.2	172	2.7	5.3
MYBL2+MYBL2	2	3.2	28.2	2.8	6
EIF3A+SUCO	9	3.2	203	2.8	4.8
DCAF13+SEC23IP	9	3.2	259	2.7	4.7
MYBL2+UBR4	7	3.2	128	2.6	5.1
BAG6+TRAPPC5	9	3.2	258	2.7	4.7
VPS52+WRB	8	3.2	171	2.5	4.9
MYBL2+SCFD1	7	3.2	122	2.4	5.2
PRPF39+RPS6	5	3.2	44.7	2.4	5.7
SEC23IP+VPS35	9	3.2	258	2.7	4.9
ERP44+KDM1A	9	3.2	258	2.7	4.7
DCTN1+SPATA5L1	9	3.2	78.4	2	5.1
SF3B2+VPS54	6	3.2	140	2.5	5.2
HNRNPK+VPS53	9	3.2	222	2.7	4.9
UGP2+VCP	9	3.2	199	2.7	4.8
SEC24A+SON	8	3.2	199	2.7	5
SEC23B+ST3GAL4	9	3.2	259	2.7	4.7
EIF3D+NAA25	4	3.2	32.2	2.6	5.9
COPS4+SEC23IP	9	3.2	259	2.7	4.7
PPP1R8+UBR4	9	3.2	169	2.5	4.9
MRPL51+RRM1	4	3.2	47.3	2.5	5.8
SPATA5L1+SUCO	9	3.2	258	2.7	4.7
PSMC6+VPS54	7	3.2	177	2.6	5
STX5+VPS54	9	3.2	187	2.6	4.8
SPCS3+SRP54	9	3.2	198	2.7	4.7
SF3A1+SPPL3	9	3.2	185	2.8	4.8
AP1M1+SEC22B	9	3.2	145	2.6	4.8
SEC23IP+SRP54	9	3.2	259	2.7	4.7
DCTN1+VPS52	8	3.2	156	2.7	5
RRS1+SEC23IP	9	3.2	210	2.6	4.8
GET4+PSMB6	9	3.2	60.9	2.3	5.4
CHAF1A+ERP44	8	3.2	200	2.5	4.9
SEC23IP+SNRPD3	9	3.2	210	2.7	4.7
MYBL2+SNRPD3	3	3.2	33.9	2.6	6
PSMC6+UGP2	9	3.2	129	2.6	5
PPP1R8+TMED10	9	3.2	98.3	2	5.1
PPP1R8+SEC23IP	9	3.2	258	2.9	4.8
MYBL2+PRPF39	7	3.2	56.9	2.3	5.6
SEC24B+STX5	9	3.2	175	2.6	4.9
ERP44+TUBB	9	3.2	237	2.7	4.7
PSMD11+UGP2	9	3.2	226	2.7	4.7
EIF3H+SEC23IP	9	3.2	238	2.7	4.7
COPB1+PRPF39	2	3.2	47	2.7	6
EIF3D+SF3A1	4	3.2	51.1	2.4	5.7
TRAPPC5+TRAPPC5	6	3.2	154	2.8	5.3
SEC23IP+WDR43	9	3.2	219	2.6	4.7
EIF3L+SCFD1	9	3.2	103	2.1	5.1
PSMD11+SPCS3	7	3.2	175	2.3	5
EIF6+SCFD1	6	3.2	92.4	2.3	5.4
WDR43+WDR43	3	3.1	32.5	2.5	5.9
NAA25+TRAPPC5	9	3.1	205	2.6	4.7
GOLIM4+UGP2	9	3.1	198	2.6	4.6
PSMD1+VPS53	8	3.1	229	2.5	4.7
SEC23IP+SON	9	3.1	219	2.5	4.7
AP1M1+VPS54	9	3.1	65.5	1.9	5.1
DCTN1+THOC5	8	3.1	64.7	2.3	5.2
COPA+VPS52	7	3.1	90.5	2.6	5.3
SF3A1+VPS54	6	3.1	104	2.6	5.3
MRPL51+SRPRB	8	3.1	107	2.5	4.9
PSMC6+STX5	9	3.1	54.5	2.3	5.6
PTPN1+RPS6	7	3.1	69.8	2.2	5.5
SRPRB+VPS52	8	3.1	221	2.6	4.8
ERP44+RPL35	9	3.1	244	2.6	4.6
MGAT5+SEC22B	9	3.1	186	2.5	4.6
COG4+SUCO	9	3.1	114	2.3	4.9
COPB1+VPS52	5	3.1	43.4	2.3	5.7
COG4+TRAPPC11	9	3.1	106	2.4	4.7
AP2A1+SPCS3	9	3.1	207	2.5	4.6
UGP2+WDR43	9	3.1	214	2.6	4.7
BAG6+TUBB	9	3.1	51.5	1.9	5.2
MRPL51+PSMA7	7	3.1	25.4	2.5	6
EIF3H+VPS53	8	3.1	229	2.6	4.9
CCT4+SPCS3	7	3.1	180	2.5	4.9
RPL4+VPS52	6	3.1	78.7	2.2	5.4
DCTN1+GET4	9	3.1	93.2	2.5	5
EIF3A+TTK	7	3.1	40.3	2.1	5.5
CCT3+SEC23IP	9	3.1	187	2.6	4.7
ERP44+SF3B2	9	3.1	214	2.6	4.7
SEC23IP+UBA3	9	3.1	239	2.7	4.7
SNRPD3+VPS52	7	3.1	120	2.2	5.1
ATP5A1+SUCO	9	3.1	259	2.8	4.7
SARS+SF3B2	6	3.1	42	2.3	5.6
PSMD2+UGP2	9	3.1	203	2.6	4.7
MRPL54+VPS35	7	3.1	37.5	2.2	5.6
BAG6+PPP1R8	8	3.1	112	2.2	4.9
COX7C+UBR4	7	3.1	92.9	2.4	5
TUBB+VPS54	9	3.1	188	2.6	4.7
SF3B2+SPPL3	9	3.1	215	2.6	4.6
GOLIM4+TRAPPC11	9	3.1	183	2.6	4.7
COPB1+SEC24B	5	3.1	59.1	2.3	5.6
RPL4+TRAPPC5	9	3.1	160	2.4	4.9
SON+UGP2	9	3.1	206	2.6	4.7
PSMD2+TUBB	9	3.1	32.6	2.2	5.7
UBA3+WDR11	6	3.1	33.9	2.3	5.7
PSMD1+TRAPPC5	9	3.1	122	2.2	4.8
SPCS3+TUBB	9	3.1	183	2.7	4.8
RPL35A+SON	3	3.1	34	2.5	5.9
BAG6+SEC24A	9	3.1	259	2.7	4.7
RPL7L1+SPPL3	9	3.1	238	2.6	4.6
RTF1+TMED10	9	3.1	53.2	1.7	4.8
AP2A1+MRPL51	7	3.1	45.3	2.2	5.5
SEC23IP+TUBB	9	3.1	259	2.7	4.7
RPL4+STX5	9	3.1	35.6	2.2	5.7
ATP5B+VPS54	3	3.1	61.7	2.5	5.8
PSMB6+SCFD1	5	3.1	89.8	2.4	5.5
ATP5A1+SPCS3	9	3.1	170	2.6	4.6
PSMD3+SF3B2	6	3.1	65.8	2.3	5.5
KDM1A+SARS	9	3.1	76.4	2.2	5
RPL4+SCFD1	4	3.1	80.1	2.6	5.6
CHAF1A+TRAPPC5	8	3.1	220	2.7	4.9
PSMB6+SGTA	9	3.1	40.5	2.2	5.6
RPL4+SEC24A	9	3.1	125	2.4	4.6
ERP44+PSMA7	8	3.1	229	2.5	4.7
DCAF13+UBR4	7	3.1	133	2.5	5.1
EIF3H+TRAPPC5	8	3.1	170	2.6	4.8
RPL7L1+SCFD1	6	3.1	107	2.5	5.2
ERP44+SF3A1	9	3.1	210	2.5	4.6
RAB14+VPS52	9	3.1	189	2.6	4.7
EIF6+STX5	9	3.1	62.1	2.3	5.5
PSMD2+SCFD1	8	3.1	87	2.4	4.8
RPL35+SARS	9	3.1	54.9	2.3	5.6
ARL1+DCAF13	6	3.1	56.1	2.5	5.7
COX7C+RPS6	4	3.1	69.1	2.6	5.6
TRAPPC3+WDR11	9	3.1	218	2.6	4.7
SEC23B+TMED2	9	3.1	259	2.7	4.7
EIF3H+SF3B2	8	3.1	98.7	2.2	4.9
CCT3+SCFD1	5	3.1	82.9	2.4	5.5
SEC23IP+THOC5	9	3.1	237	2.6	4.6
RPL35+SPPL3	9	3.1	221	2.6	4.6
MRPL51+UBR4	7	3.1	133	2.2	5
SCFD1+SF3B2	6	3.1	149	2.2	5.2
PTPN1+TRAPPC11	9	3.1	147	2.5	4.9
ERP44+THOC5	9	3.1	259	2.6	4.6
MYBL2+SEC24B	9	3.1	111	2.5	4.8
SAMM50+TRAPPC5	8	3.1	220	2.6	4.8
ATP5A1+WDR3	8	3.1	62	2.3	5.2
ERP44+SGTA	9	3.1	259	2.7	4.6
PRPF39+SRP54	9	3.1	52.7	2.3	5.6
TMED10+WDR43	9	3.1	29.3	2.5	5.9
ATP5A1+SEC23IP	9	3.1	258	2.7	4.7
ERP44+MRPL54	9	3.1	259	2.7	4.7
ERP44+WDR3	9	3	238	2.6	4.7
ARL1+SCFD1	6	3	60.2	2.1	5.4
DCTN1+VCP	6	3	35.4	2.3	5.8
AKAP9+VPS53	9	3	194	2.6	4.5
CCT4+ERP44	9	3	259	2.5	4.5
GOLIM4+SPCS3	9	3	154	2.5	4.7
SCFD1+STX5	9	3	167	2.5	4.5
AP2A1+PSMC1	9	3	54	2	5.3
SEC24A+VPS35	8	3	135	2.4	4.8
SEC23IP+SMC3	9	3	116	2.3	4.6
AP2A1+SCFD1	7	3	128	2.5	5
SON+SUCO	9	3	220	2.5	4.6
EIF3H+UTP20	2	3	35.9	2.4	5.9
HNRNPK+SUCO	9	3	241	2.5	4.6
COPS4+UTP20	4	3	56.5	2.4	5.8
DCAF13+STX5	9	3	88.2	2.3	4.9
NAA25+TRAPPC11	8	3	162	2.3	4.8
SEC24A+SRP54	9	3	244	2.5	4.6
PSMD2+VPS53	9	3	217	2.5	4.6
PSMD2+TRAPPC5	9	3	198	2.4	4.6
BAG6+VPS52	8	3	190	2.5	4.7
COPS4+UGP2	9	3	180	2.5	4.5
SMC3+SUCO	9	3	158	2.1	4.6
DCTN1+PSMC1	9	3	68.1	2.1	5.2
EIF3D+SPCS3	7	3	148	2.4	4.9
IFFO1+SPPL3	9	3	139	2.4	4.6
PRPF39+SPCS3	8	3	206	2.5	4.7
SAMM50+VPS52	8	3	167	2.4	4.6
KDM1A+SPPL3	9	3	259	2.6	4.5
DCTN1+WRB	9	3	68.1	2.1	5.1
ST3GAL4+TRAPPC11	9	3	148	2.4	4.5
GET4+UBA3	9	3	65.6	2.2	5
SEC24A+SPATA5L1	9	3	103	2.5	4.7
TMED10+VPS54	9	3	72.2	2.4	5
DCAF13+EIF3L	9	3	25.9	2.3	5.8
EIF6+SEC23IP	9	3	141	2.5	4.6
ARL1+UGP2	9	3	112	2.4	4.6
PPP1R8+UGP2	9	3	226	2.6	4.6
SF3A1+SPCS3	7	3	152	2.4	4.9
IFFO1+SCFD1	8	3	77.3	2.2	4.9
CAMLG+PSMC6	9	3	194	2.6	4.6
SPATA5L1+STX5	9	3	93.3	2.4	5
AKAP9+UGP2	9	3	178	2.5	4.6
MRPL54+VPS54	9	3	200	2.4	4.6
PRPF39+SUCO	9	3	248	2.5	4.4
BAG6+SEC24B	9	3	226	2.5	4.4
EIF3H+SPPL3	9	3	210	2.4	4.4
ATP5B+EIF3D	1	3	28.1	2.6	6
ARL1+CAMLG	9	3	182	2.5	4.5
SARS+VPS35	8	3	109	2.2	4.9
RPL35+VCP	5	3	69.6	2.2	5.5
MRPL51+SPPL3	9	3	250	2.6	4.5
IFFO1+UGP2	9	3	155	2.3	4.6
DCTN1+TMED2	9	3	97.5	2.5	4.8
SPPL3+THOC5	9	3	201	2.4	4.5
PSMD3+SPPL3	9	3	191	2.5	4.5
SEC24B+SRPRB	9	3	214	2.5	4.5
MRPL51+SPCS3	9	3	228	2.6	4.6
SEC24B+UTP20	8	3	139	2.3	4.7
KDM1A+SEC23IP	9	3	246	2.5	4.5
COX7C+SEC23IP	9	3	259	2.7	4.6
RPS6+STX5	8	3	83.7	2.2	5
DCAF13+RPL4	5	3	55.3	2.1	5.4
BAG6+STX5	9	3	125	2.4	4.7
SCFD1+TUBB	8	3	146	2.4	4.9
ANAPC2+SPPL3	9	3	257	2.6	4.6
PRPF39+VPS54	8	3	185	2.4	4.6
DCTN1+UBR4	8	3	131	2.3	4.8
PPP1R8+SEC24A	9	3	231	2.6	4.6
ATP5B+RRM1	2	3	47.2	2.5	5.9
SCFD1+VPS35	8	3	173	2.6	4.8
RPL35A+SEC24A	9	3	128	2.3	4.7
DCTN1+PSMD1	7	3	70	2.3	5.6
DCTN1+WDR43	8	3	86.2	2.4	5.3
SEC24A+WDR3	9	3	152	2.4	4.5
AKAP9+RRS1	9	3	62.1	2.2	5.6
ARL1+DCTN1	8	3	38.1	2.1	5.6
SPPL3+WDR43	9	3	240	2.6	4.6
SARS+SRP54	9	3	65.3	1.7	4.6
PSMA7+SARS	7	3	87.6	2.1	5
SF3B2+SPCS3	8	3	138	2.3	4.7
PSMD11+WRB	9	3	67.5	1.8	4.9
PSMD2+TRAPPC11	9	3	171	2.5	4.6
ERP44+MRPL51	9	3	259	2.6	4.6
RAD21+SEC24C	9	2.9	197	2.5	4.5
COG3+SEC24A	9	2.9	125	2.5	4.8
DCTN1+NAA25	8	2.9	67.7	2	5.2
ATP5B+DCTN1	5	2.9	32.7	2.3	5
SPPL3+TMED2	9	2.9	226	2.3	4.3
DCTN1+WDR3	7	2.9	101	2.3	5.2
ATP5B+TRAPPC5	6	2.9	141	2.1	4.9
CCNA2+TRAPPC8	9	2.9	260	2.6	4.5
COPS4+ERP44	9	2.9	258	2.5	4.4
ATP5B+RAB14	9	2.9	41.9	1.9	5.4
SCFD1+ST3GAL4	9	2.9	150	2.2	4.7
RPL35A+SCFD1	7	2.9	141	2.4	4.9
TMED10+UBA3	9	2.9	103	2.4	4.9
AP2A1+SRPRB	7	2.9	126	2.3	4.9
PSMA7+SEC24A	9	2.9	183	2.2	4.5
GET4+PSMD11	9	2.9	23.6	2.3	5.9
ARL1+SEC23B	9	2.9	249	2.5	4.4
PSMB6+SEC24A	9	2.9	211	2.4	4.5
ATP5A1+SEC24A	9	2.9	227	2.4	4.4
MRPL54+SEC24A	9	2.9	228	2.4	4.3
SMC3+UGP2	9	2.9	197	2.3	4.4
PSMA7+RPL4	6	2.9	57.7	1.9	5.2
HNRNPK+VPS54	9	2.9	140	2.4	4.8
NAA25+UGP2	9	2.9	182	2.4	4.5
NAA25+SCFD1	8	2.9	143	2.2	4.7
PSMB6+VPS52	7	2.9	110	2.3	4.9
RRS1+VPS52	7	2.9	95.3	1.9	4.8
SF3A1+SRPRB	4	2.9	84.5	2.1	5.5
EIF3H+SRP54	9	2.9	61.3	2	5.1
THOC5+VPS54	8	2.9	148	2.3	4.7
EIF6+VPS53	7	2.9	121	2.2	4.7
CCNA2+VPS54	9	2.9	144	2.3	4.3
ARL1+UBA3	8	2.9	55	2	5.3
CHAF1A+SRP54	8	2.9	82.1	2.3	4.8
PRPF39+UGP2	9	2.9	174	2.4	4.5
SAMM50+SRPRB	5	2.9	90.6	2.2	5.3
SARS+SEC24A	9	2.9	192	2.3	4.4
CHAF1A+SEC24A	9	2.9	222	2.4	4.5
VPS52+WDR3	8	2.9	148	2.3	4.7
EIF3L+PSMC6	9	2.9	23.3	2.3	5
COX7C+SRPRB	9	2.9	138	2.2	4.4
SNRPD3+SUCO	9	2.9	238	2.4	4.4
DCAF13+VPS52	7	2.9	148	2.3	4.7
IFFO1+SEC23IP	9	2.9	170	2.3	4.5
SF3B2+TRAPPC5	9	2.9	177	2.3	4.5
ERP44+PSMC6	9	2.9	180	2.3	4.5
COG3+SUCO	9	2.9	168	2.3	4.5
COG4+RRS1	8	2.9	44.7	1.7	5.2
KDM1A+RPL35A	7	2.9	76.6	2.2	5.1
PSMD2+SPCS3	8	2.9	181	2.3	4.7
COPS4+VPS54	8	2.9	114	2.3	4.7
AKAP9+SPCS3	9	2.9	171	2.4	4.4
SPATA5L1+TRAPPC5	9	2.9	203	2.4	4.5
PSMB6+TRAPPC5	8	2.9	159	2.4	4.7
MYBL2+SARS	6	2.9	62.9	2	5.2
VPS35+WRB	8	2.9	68.2	2.1	5
DCTN1+PPP1R8	9	2.9	46.1	1.4	4.7
RTF1+VPS52	6	2.9	138	2.1	4.9
BAG6+DCTN1	9	2.9	92.1	2.3	4.6
GET4+RRM1	7	2.9	37.3	1.9	5.5
UBR4+UTP20	7	2.9	134	2.4	4.8
ATP5A1+CCT4	9	2.9	36.6	2	5.6
SMC3+SPPL3	9	2.9	102	2.3	4.7
CCNA2+SPCS3	9	2.9	150	2.4	4.5
COX7C+MRPL51	9	2.9	90.7	2.2	4.8
MRPL54+TRAPPC5	9	2.9	243	2.3	4.4
CHAF1A+VPS52	8	2.9	163	2.4	4.6
CCT4+UBR4	8	2.9	69	1.7	4.7
SARS+SF3A1	4	2.9	32	2.3	5.9
RPL7L1+SEC24A	9	2.9	103	2.2	4.4
RPL35+VPS52	9	2.9	126	2.2	4.6
RRM1+VPS54	3	2.9	44.7	2.3	5.8
COG3+SEC23IP	9	2.9	126	2.3	4.7
EIF3H+SPCS3	8	2.9	166	2.4	4.6
RPL7L1+TRAPPC5	7	2.8	173	2.2	4.7
RPL35+SEC23IP	9	2.8	247	2.4	4.3
MRPL54+SEC23IP	9	2.8	239	2.5	4.2
SEC23B+TMED10	9	2.8	260	2.5	4.2
SRP54+VPS52	9	2.8	164	2.2	4.1
TRAPPC5+WDR43	8	2.8	168	2.3	4.5
SEC24B+VCP	9	2.8	120	2.2	4.5
PSMD11+RPL35A	6	2.8	59.7	1.9	4.7
ST3GAL4+VPS53	9	2.8	206	2.4	4.2
AP1M1+TRAPPC3	9	2.8	112	2.2	4.3
PSMD1+TRAPPC11	8	2.8	192	2.3	4.5
ATP5A1+UBR4	9	2.8	102	2.1	4.4
AKAP9+SCFD1	9	2.8	128	2.1	4.6
RAB14+SEC24B	9	2.8	249	2.4	4.4
EIF3A+SEC24B	9	2.8	77.7	1.9	4.8
SGTA+TRAPPC5	9	2.8	230	2.3	4.3
MRPL51+VCP	7	2.8	43.7	1.9	4.7
MRPL54+SF3B2	8	2.8	35.6	1.9	4.8
SEC24A+WDR43	8	2.8	110	2	4.7
UBR4+WRB	8	2.8	117	2.2	4.6
UBR4+VPS54	6	2.8	131	2.2	4.9
RPL7L1+SRPRB	9	2.8	172	2.3	4.2
PPP1R8+SCFD1	7	2.8	139	2.3	4.7
DCAF13+DCAF13	3	2.8	42.8	2.2	5
ATP5B+SEC24B	8	2.8	65.6	2.1	5
VPS52+VPS52	5	2.8	142	2.2	4.7
COPB1+COPS4	3	2.8	85.7	2.4	4.9
EIF3A+SEC23IP	9	2.8	189	2.5	4.4
COPS4+MYBL2	6	2.8	29.8	2.2	5
RRS1+SRPRB	4	2.8	42.8	2.2	4.9
RRS1+SCFD1	6	2.8	86.6	2	4.5
KDM1A+RRS1	4	2.8	28.3	2.2	5
PTPN1+SUCO	9	2.8	164	2.2	4.3
RPS6+VPS52	7	2.8	95.5	2	4.9
DCAF13+ERP44	9	2.8	221	2.4	4.4
EIF3L+UBA3	9	2.8	26.5	2	5
PRPF39+VPS52	9	2.8	103	1.8	4.4
ATP5B+CHAF1A	5	2.8	80.8	2.3	4.7
ARL1+BAG6	9	2.8	29	2	4.9
PSMC6+SEC23IP	9	2.8	194	2.3	4.4
BAG6+PSMD3	8	2.8	68.4	2	4.6
ERP44+WDR11	9	2.8	126	1.8	4.3
EIF3D+UBA3	2	2.8	26.9	2.3	5
ERP44+MYBL2	9	2.8	207	2.3	4.3
CCNA2+SEC23IP	9	2.8	205	2.3	4.4
PSMC1+SCFD1	8	2.8	135	2.2	4.5
EIF6+VPS54	7	2.8	115	1.9	4.6
ERP44+SPATA5L1	9	2.8	224	2.4	4.3
VPS54+WDR43	4	2.8	69.2	2.3	4.8
CCNA2+VPS52	8	2.8	66.9	2	4.8
CCNA2+RTF1	8	2.8	60.8	1.9	5
COPB1+TRAPPC5	4	2.8	79.2	2.2	4.9
CCT3+STX5	9	2.8	130	2.1	4.4
RAB14+UBR4	9	2.8	177	2.4	4.5
AKAP9+DCTN1	9	2.8	77.7	2.3	4.8
RPL35A+SF3A1	4	2.8	31.9	2.2	5
ANAPC2+UTP20	4	2.8	57.2	2.3	4.9
PSMB6+RPL35A	1	2.8	28.2	2.3	5
CAMLG+RAD21	9	2.8	173	2.3	4.5
DCTN1+VPS35	6	2.8	60.5	2.1	4.7
DCTN1+SRPRB	8	2.8	167	2.2	4.4
RAB14+RTF1	9	2.8	116	2.1	4.3
ERP44+PSMC1	9	2.8	204	2.3	4.3
EIF3H+SMC3	8	2.8	78.4	2.1	5.2
RTF1+WRB	9	2.8	79.3	2.2	5
EIF6+TRAPPC5	9	2.8	118	2.2	4.3
EIF6+UBA3	6	2.8	42.9	2	4.8
ANAPC2+BAG6	8	2.8	48	1.9	4.6
PSMB6+STX5	8	2.8	64.6	1.7	4.7
COX7C+VPS52	8	2.8	124	2.3	4.6
CCNA2+UGP2	9	2.8	103	2.2	4.5
COPB1+SGTA	5	2.8	43.4	2.2	5
ARL1+PPP1R8	8	2.8	24.1	2.2	5
COPB1+PSMC1	3	2.8	38.5	2.2	5
MGAT5+VPS54	9	2.8	29.3	2.2	5
COPB1+THOC5	6	2.8	67.3	1.9	5.1
RAB14+RPL35A	9	2.8	69.8	2	4.8
ATP5A1+DCTN1	9	2.8	83.6	2.2	4.9
DCTN1+EIF3H	8	2.8	86.2	2.2	4.4
DCTN1+KDM1A	9	2.8	69.4	1.9	4.8
DCTN1+SGTA	9	2.8	83	2.2	5.1
UBR4+WDR3	7	2.8	80.8	1.9	4.8
DCTN1+PSMD2	8	2.8	52.9	2	4.7
MRPL54+STX5	9	2.8	139	2.1	4.4
DCTN1+RTF1	5	2.8	70	2.1	4.8
TTK+VPS54	4	2.8	70.3	2.3	4.8
GET4+SEC24A	9	2.8	240	2.4	4.1
DCTN1+GOLIM4	9	2.8	43.3	2.1	4.9
MYBL2+SEC24A	9	2.8	176	2.3	4.4
SPATA5L1+VPS54	9	2.8	197	2.3	4.4
RPL7L1+VPS54	5	2.8	53.5	2.1	4.8
UBA3+VPS52	7	2.8	177	2.2	4.7
SUCO+WDR11	9	2.7	136	2	4.3
PSMD1+SEC23IP	9	2.7	217	2.2	4.2
[truncated: 3,518 more rows]

## Sheet: Unt vs Ricin rep 2
#GeneID	Element #	casTLE Effect	casTLE Score	Minimum Effect Estimate	Maximum Effect Estimate
ARL1+SEC23B	9	2.6	261	2.2	3.9
HNRNPK+SEC23IP	9	2.5	261	2.1	3.8
RPL35+SEC23IP	9	2.8	260	2.4	4.4
EIF3L+ERP44	9	2.7	260	2.3	4.1
PSMC1+SPPL3	9	2.9	259	2.4	4.4
COPS4+SEC23IP	9	2.9	259	2.6	4.5
SEC23IP+SRP54	9	3.1	259	2.5	4.6
ERP44+SGTA	9	3.1	259	2.7	4.7
ATP5A1+SEC23IP	9	3.1	259	2.7	4.7
MRPL54+SEC23IP	9	3.1	258	2.7	4.7
PSMC1+TRAPPC8	9	3.3	258	2.8	4.9
COX7C+SPPL3	9	3.2	258	2.7	4.8
ST3GAL4+TRAPPC8	9	3.2	258	2.7	4.8
ATP5A1+ERP44	9	3.3	258	2.8	4.8
SGTA+SPPL3	9	3.3	258	2.7	4.8
SEC23B+ST3GAL4	9	3.1	258	2.7	4.8
SEC23IP+SPATA5L1	9	3.2	258	2.5	4.8
COX7C+SEC23IP	9	3.2	258	2.7	4.9
ARL1+SEC24C	9	3.2	258	2.7	4.8
ANAPC2+SPPL3	9	3.2	258	2.7	4.8
ERP44+MRPL54	9	3.3	258	2.6	4.9
ASNA1+TMED10	9	3.5	257	3.1	5.3
SPPL3+WRB	9	3.3	257	2.8	5
SPPL3+SRP54	9	3.4	257	2.9	5.2
SEC23B+TMED10	9	3.3	257	2.7	5
EIF3L+SUCO	9	3.5	257	2.9	5.2
PSMC1+SEC24C	9	3.5	257	3	5.3
GOLIM4+SEC24C	9	3.5	257	3.2	5.4
RAB14+SEC24B	9	3.3	257	2.5	4.9
PTPN1+SEC24C	9	3.5	257	3	5.2
SON+SUCO	9	3.3	257	2.5	4.8
ERP44+VCP	9	3.5	257	3	5.2
IFFO1+TRAPPC8	9	3.5	257	3	5.3
SEC24B+TRAPPC5	9	3.4	257	2.9	5.1
SEC23IP+VPS35	9	3.2	257	2.8	4.9
SEC23IP+TUBB	9	3.3	257	2.6	5
AP2A1+SEC23IP	9	3.5	257	3	5.3
ERP44+PSMD11	9	3.5	257	2.9	5.2
SEC23IP+SGTA	9	3.2	257	2.9	5
MRPL51+SPPL3	9	3.3	257	2.6	4.9
SUCO+THOC5	9	3.4	257	3	5.2
ERP44+WRB	9	3.5	257	2.9	5.2
KDM1A+VPS53	9	3.3	257	2.5	4.9
PPP1R8+SEC23IP	9	3.4	257	3	5.2
ERP44+GET4	9	3.5	257	2.9	5.2
SEC23B+TMED2	9	3.3	257	2.7	5.1
SEC23IP+WRB	9	3.5	257	2.9	5.3
ERP44+UBA3	9	3.4	256	2.8	5.1
COPA+SUCO	9	3.8	256	3.2	5.7
SEC22B+ST3GAL4	9	3.7	256	3.1	5.6
ERP44+PSMD3	9	3.7	256	3	5.4
PPP1R8+TRAPPC5	9	3.6	256	3	5.4
TMED10+TRAPPC11	9	3.7	256	3	5.4
PSMD2+SUCO	9	3.8	256	2.9	5.5
GET4+SEC23IP	9	3.8	256	3.1	5.6
GET4+SPPL3	9	3.4	256	2.7	5.1
DCAF13+SUCO	9	3.6	256	3.2	5.4
AKAP9+SEC24C	9	3.8	256	3.4	5.6
PSMD2+SEC24C	9	3.6	256	3.1	5.4
BAG6+VPS53	9	3.7	256	3.1	5.5
RAB14+UGP2	9	3.8	256	3.4	5.8
RAB14+TRAPPC11	9	3.7	256	3.3	5.5
PRPF39+TRAPPC8	9	3.7	256	3.3	5.5
BAG6+SPPL3	9	3.7	256	3.2	5.5
ST3GAL4+TRAPPC3	9	3.8	256	3.3	5.6
CCT4+SPPL3	9	3.8	256	3.3	5.8
ERP44+SRP54	9	3.7	256	3.3	5.5
GET4+SUCO	9	3.7	256	3.3	5.5
PRPF39+SUCO	9	3.7	256	2.8	5.3
PRPF39+SEC24C	9	3.8	256	3.4	5.7
SGTA+TRAPPC11	9	3.7	256	3.2	5.6
PSMC6+SEC24C	9	3.7	256	3.2	5.5
THOC5+TRAPPC8	9	3.7	256	3.2	5.5
SUCO+WRB	9	3.8	256	3.2	5.6
SGTA+SUCO	9	3.6	256	3.2	5.5
AP2A1+ERP44	9	3.5	256	2.9	5.2
DCAF13+UGP2	9	3.7	256	3	5.6
KDM1A+SEC23IP	9	2.8	256	2.3	4.4
CHAF1A+SEC23IP	9	3.6	256	2.9	5.3
CCT4+SUCO	9	3.8	256	3.1	5.7
TRAPPC11+WRB	9	3.7	256	3.3	5.5
ASNA1+MGAT5	9	3.6	256	3.1	5.4
PPP1R8+SEC24A	9	3	256	2.4	4.5
SUCO+TMED10	9	3.7	256	3.2	5.5
RAB14+VPS53	9	3.6	256	2.9	5.3
SARS+SPPL3	9	3.7	256	2.9	5.4
RPL35+SUCO	9	3.7	256	3.1	5.6
SEC24C+ST3GAL4	9	3.8	256	3.3	5.7
RAB14+SPPL3	9	3.7	256	3.2	5.6
CCNA2+TRAPPC3	9	3.5	256	3	5.3
AKAP9+SEC23B	9	3.7	256	3.2	5.5
COPS4+SUCO	9	3.8	256	3.3	5.7
ERP44+PPP1R8	9	3.7	256	3.3	5.7
ERP44+SARS	9	3.6	256	3	5.3
ERP44+RAB14	9	3.8	256	3.4	5.8
SEC24B+SPPL3	9	4.1	255	3.6	6.1
PRPF39+SEC23B	9	4.1	255	3.6	6.1
SEC22B+SRPRB	9	4	255	3.4	5.9
RPS6+SEC23IP	9	3.8	255	3.4	5.8
TMED10+TRAPPC8	9	4.1	255	3.7	6.1
RAB14+TRAPPC8	9	4.1	255	3.6	6.1
PSMC6+SEC23B	9	3.9	255	3.4	5.9
ERP44+RPL35	9	3	255	2.4	4.5
SGTA+TRAPPC8	9	4	255	3.6	6
KDM1A+TRAPPC8	9	4	255	3.5	6
VPS52+VPS53	9	4	255	3.4	6
ATP5A1+SEC24C	9	4	255	3.5	6
PSMA7+SUCO	9	3.9	255	3.2	5.7
ERP44+STX5	9	4	255	3.5	6.1
SEC23IP+SRPRB	9	3.9	255	3.5	5.9
COG4+SEC23B	9	3.9	255	3.2	5.8
SEC24C+WDR11	9	3.9	255	3.3	5.8
RPL35+TRAPPC8	9	4.1	255	3.6	6.1
IFFO1+SEC23B	9	4	255	3.5	6
RAB14+SEC23IP	9	4	255	3.6	6
SUCO+TMED2	9	3.8	255	3.2	5.7
SRP54+UGP2	9	4	255	3.5	6
CAMLG+GET4	9	4	255	3.4	6
SEC24A+TRAPPC5	9	4	255	3.7	6.1
SEC23IP+WDR3	9	4	255	3.3	6
ERP44+MYBL2	9	3.8	255	3.2	5.8
RPL35+TRAPPC11	9	4.1	255	3.2	5.9
DCAF13+SEC23IP	9	3.9	255	3.4	5.9
ERP44+RTF1	9	3.9	255	3.1	5.7
ATP5A1+TRAPPC8	9	4.1	255	3.6	6.1
ERP44+SRPRB	9	4	255	3.2	5.9
PTPN1+SEC23B	9	4	255	3.5	6
SUCO+WDR43	9	4	255	3.1	5.8
GOLIM4+SEC23B	9	4	255	3.3	5.9
HNRNPK+SEC24C	9	3.9	255	3.4	5.9
ATP5B+SEC23IP	9	4	255	3.3	5.9
UGP2+VCP	9	4.1	255	3.2	5.9
BAG6+TRAPPC11	9	4	255	3.3	5.9
COPS4+TRAPPC11	9	3.8	255	3	5.6
AKAP9+TRAPPC8	9	3.8	255	3.3	5.7
TRAPPC8+TUBB	9	4	255	3.5	6
SRP54+TRAPPC11	9	4.1	255	3.6	6.2
CHAF1A+TRAPPC8	9	4	255	3.5	6
SON+TRAPPC8	9	4	255	3.1	5.8
SEC24B+TRAPPC11	9	4	255	3.7	6.1
ERP44+VPS35	9	3.8	255	3.3	5.8
EIF3L+VPS53	9	4	255	3.4	5.9
PSMD1+SUCO	9	3.8	255	3	5.7
PSMD3+SEC24C	9	3.9	255	3.4	5.9
PPP1R8+SUCO	9	3.9	255	3.5	5.9
GOLIM4+TRAPPC3	9	3.8	255	3.4	5.8
SEC23IP+SEC24B	9	3.9	255	3.6	6
HNRNPK+TRAPPC3	9	3.8	255	3.2	5.7
DCTN1+ERP44	9	4.1	255	3.6	6.1
GOLIM4+TRAPPC8	9	3.9	255	3.4	5.9
TRAPPC5+VPS53	9	4	255	3.3	5.9
RAB14+SEC24A	9	3.9	255	3.3	5.8
GET4+TRAPPC11	9	4	255	3.3	5.8
COPS4+TRAPPC3	9	4.1	255	3.6	6.1
DCTN1+SUCO	9	4	255	3.5	6
SEC23IP+UBR4	9	4.1	255	3.7	6.2
TRAPPC5+TRAPPC8	9	4.1	255	3.7	6.1
CCNA2+SEC24C	9	3.8	255	3.2	5.7
TRAPPC8+WRB	9	4	255	3.7	6.1
BAG6+SEC23IP	9	4.1	255	3.5	6
RPL35A+SEC23IP	9	3.6	255	2.9	5.3
SRPRB+SUCO	9	4.1	255	3.7	6.1
ERP44+MRPL51	9	3.9	255	3	5.7
HNRNPK+SEC23B	9	4.4	254	4.1	6.7
MRPL51+SEC23IP	9	4.4	254	3.4	6.3
ASNA1+KDM1A	9	4.3	254	3.7	6.4
MRPL51+SUCO	9	4.2	254	3.4	6.1
EIF3L+SEC24C	9	4.3	254	3.9	6.5
COPS4+SEC23B	9	4.2	254	3.8	6.3
AP2A1+TRAPPC3	9	4.1	254	3.5	6.1
ASNA1+THOC5	9	4.2	254	3.8	6.3
MRPL51+SEC24C	9	4.4	254	3.9	6.5
KDM1A+SEC22B	9	4.4	254	3.9	6.6
CCNA2+TRAPPC8	9	4.2	254	3.1	6
TRAPPC8+WDR43	9	4.2	254	3.3	6.2
ASNA1+STX5	9	4.3	254	3.5	6.3
KDM1A+SEC24C	9	4.2	254	3.7	6.4
RRM1+UGP2	9	4.1	254	3.3	6
SARS+SUCO	9	4.2	254	3.5	6.1
SRPRB+UGP2	9	4.4	254	3.3	6.3
RAB14+TRAPPC3	9	4.2	254	3.7	6.2
ASNA1+PSMC1	9	4.2	254	3.4	6.1
EIF3L+TRAPPC8	9	4.2	254	3.6	6.2
SEC24A+STX5	9	4.2	254	3.3	6.1
SAMM50+SUCO	9	4.3	254	3.7	6.4
TRAPPC8+TTK	9	4.4	254	3.8	6.6
PSMD2+TRAPPC3	9	4.3	254	3.8	6.5
VPS53+WRB	9	4.2	254	3.6	6.2
ATP5A1+SUCO	9	4.4	254	3.2	6.3
TRAPPC3+TUBB	9	4.3	254	3.6	6.4
SPCS3+VPS54	9	4.2	254	3.6	6.2
ERP44+UBR4	9	4.3	254	3.8	6.3
SEC23B+THOC5	9	4.3	254	3.8	6.4
SARS+UGP2	9	3.9	254	3.3	5.8
AP1M1+GMDS	9	4.2	254	3.7	6.3
MRPL54+TRAPPC11	9	4.4	254	3.4	6.4
TMED2+UGP2	9	4.2	254	3.6	6.2
BAG6+TRAPPC8	9	4.3	254	3.9	6.4
SEC23IP+STX5	9	4.1	254	3.7	6.2
MRPL54+TRAPPC8	9	4.4	254	3.6	6.4
CAMLG+CCT4	9	4.3	254	3.7	6.4
SCFD1+SEC23IP	9	4.3	254	3.6	6.3
SEC24B+UGP2	9	4.4	254	3.9	6.5
UBR4+UGP2	9	4.4	254	3.9	6.5
PSMD1+TRAPPC8	9	4.2	254	3.4	6.1
RPL7L1+SEC23B	9	4.4	254	3.9	6.6
RPL35+SEC24C	9	4.2	254	3.8	6.2
COPS4+SEC24C	9	4.3	254	3.9	6.3
TMED2+TRAPPC8	9	4.3	254	3.7	6.4
PSMC1+SEC23B	9	4.2	254	3.7	6.2
TMED10+UGP2	9	4.2	254	3.7	6.2
AKAP9+TRAPPC3	9	4.3	254	3.7	6.4
PSMC6+SEC22B	9	4.2	254	3.3	6.2
RPL35A+TRAPPC8	9	4.2	254	3.6	6.2
SEC23B+TUBB	9	4.3	254	3.9	6.5
ERP44+VPS54	9	4.3	254	3.8	6.3
SEC23B+SEC24B	9	4.4	254	4	6.6
COX7C+SEC24C	9	4.2	254	3.7	6.2
ASNA1+PSMD11	9	4.4	254	3.8	6.6
STX5+TRAPPC11	9	4.3	254	3.6	6.3
BAG6+SUCO	9	4.3	254	3.8	6.5
SON+TRAPPC3	9	4.4	254	3.5	6.4
ATP5A1+SEC23B	9	4.3	254	3.8	6.3
TRAPPC8+UBR4	9	4.3	254	3.9	6.5
SEC24C+THOC5	9	4.3	254	3.8	6.3
SPATA5L1+TRAPPC8	9	4.4	254	3.5	6.3
PSMD1+SEC23B	9	4.2	254	3.7	6.2
COG4+SEC24C	9	4.2	254	3.1	6
ASNA1+GOLIM4	9	4.2	254	3.8	6.3
PSMD3+SEC24A	9	2.4	254	2	3.8
SPCS3+TRAPPC5	9	4.3	254	3.7	6.3
PSMB6+SPPL3	9	4.3	254	3.6	6.3
PPP1R8+SEC22B	9	4.4	254	3.7	6.4
ERP44+VPS52	9	4.4	254	4	6.6
CAMLG+PRPF39	9	4.4	254	3.9	6.6
SEC23IP+SEC24A	9	4.4	254	4	6.6
STX5+UGP2	9	4.2	254	3.5	6.1
COPS4+TRAPPC8	9	4.4	254	3.8	6.6
GET4+TRAPPC8	9	4.4	254	3.8	6.5
ATP5A1+TRAPPC3	9	4.2	254	3.6	6.2
SAMM50+TRAPPC8	9	4.3	254	3.6	6.3
STX5+SUCO	9	4.3	254	3.8	6.5
MRPL54+SEC23B	9	4.4	254	3.9	6.6
SEC24A+SPPL3	9	4.4	254	4	6.6
SPPL3+UBR4	9	4.4	253	3.8	6.6
SPCS3+UGP2	9	4.7	253	4.1	6.9
CAMLG+MRPL51	9	4.6	253	3.9	6.7
ERP44+UTP20	9	4.6	253	3.8	6.7
ANAPC2+TRAPPC3	9	4.5	253	3.9	6.7
RPS6+TRAPPC8	9	4.4	253	3.7	6.5
ASNA1+PTPN1	9	4.5	253	3.6	6.5
EIF3D+SEC24C	9	4.7	253	4.1	6.9
TMED10+TRAPPC3	9	4.5	253	4	6.7
SCFD1+UGP2	9	4.5	253	3.7	6.6
AP2A1+TRAPPC8	9	4.6	253	3.8	6.8
CAMLG+TRAPPC8	9	4.7	253	4	6.8
COPA+TRAPPC8	9	4.4	253	3.9	6.6
TRAPPC3+VPS52	9	4.4	253	4	6.6
SEC22B+SEC24A	9	4.6	253	4.2	6.9
SPCS3+SPPL3	9	4.5	253	4.1	6.8
ATP5B+TRAPPC8	9	4.4	253	3.6	6.5
ASNA1+IFFO1	9	4.5	253	3.8	6.6
EIF3A+SEC24C	9	4.8	253	4.1	7
SEC24C+WRB	9	4.6	253	4.1	6.8
SUCO+WDR3	9	4.6	253	3.5	6.7
DCTN1+SEC22B	9	4.6	253	4.1	6.9
SUCO+VPS52	9	4.5	253	4	6.7
SUCO+VPS54	9	4.7	253	4	6.8
PSMA7+SEC24C	9	4.5	253	3.9	6.7
GMDS+RAD21	9	4.8	253	4.3	7.1
EIF3L+TRAPPC3	9	4.5	253	4.1	6.8
ASNA1+EIF6	9	4.4	253	3.5	6.4
SEC22B+SEC23IP	9	4.6	253	4	6.8
ASNA1+PSMA7	9	4.6	253	3.7	6.7
COPA+SEC24C	9	4.5	253	4	6.7
RAB14+SEC22B	9	4.7	253	3.8	6.8
SEC24A+UGP2	9	4.8	253	4.4	7.1
ANAPC2+CAMLG	9	4.5	253	3.7	6.6
COX7C+SEC23B	9	4.5	253	4.1	6.7
PTPN1+SEC22B	9	4.6	253	3.7	6.7
PPP1R8+SEC23B	9	4.6	253	4.3	6.9
SEC23B+WRB	9	4.4	253	4.1	6.7
SEC23B+SGTA	9	4.6	253	4.2	6.8
RPL35+TRAPPC3	9	4.7	253	4	6.8
SEC24A+TRAPPC11	9	4.6	253	4.2	6.8
SEC24B+TRAPPC8	9	4.6	253	4	6.7
SEC24B+TRAPPC3	9	4.7	253	4.2	6.9
TRAPPC3+TTK	9	4.6	253	4	6.8
COX7C+TRAPPC8	9	4.7	253	4	6.9
ASNA1+SPATA5L1	9	4.6	253	3.9	6.6
RPL35A+SEC23B	9	4.5	253	4	6.7
KDM1A+SUCO	9	4.2	253	3.3	6.1
SRPRB+TRAPPC3	9	4.5	253	4	6.7
RAB14+SUCO	9	4.5	253	4.1	6.8
ASNA1+UBR4	9	4.7	253	4.1	6.9
DCTN1+TRAPPC3	9	4.6	253	3.9	6.8
SEC23B+SPATA5L1	9	4.6	253	3.9	6.8
BAG6+TRAPPC3	9	4.5	253	4.1	6.8
TRAPPC3+TRAPPC5	9	4.6	253	3.8	6.7
SEC24A+SGTA	9	2.5	253	2.1	3.8
ERP44+TRAPPC5	9	4.4	253	4	6.7
ASNA1+SEC24A	9	4.5	253	4.1	6.7
TRAPPC11+TRAPPC5	9	4.6	253	3.9	6.8
TRAPPC11+TRAPPC8	9	4.5	253	4.1	6.8
EIF3H+TRAPPC3	9	4.5	253	3.8	6.6
MRPL54+VPS53	9	4.6	253	3.9	6.8
PSMD11+SEC23B	9	4.7	253	4.2	7
SEC24A+SUCO	9	4.6	253	4.2	6.9
BAG6+SEC24C	9	4.5	253	4.1	6.7
CAMLG+SEC24C	9	4.7	253	4.2	6.9
SEC24C+VPS35	9	4.5	253	3.8	6.6
SEC22B+TUBB	9	4.7	253	4.1	6.9
ERP44+RPL35A	9	3.6	253	3.2	5.5
STX5+TRAPPC8	9	4.6	253	3.9	6.8
SEC24C+TUBB	9	4.5	253	3.8	6.7
EIF3L+SEC23B	9	4.6	253	4	6.7
SRP54+SUCO	9	4.7	253	4	6.8
ERP44+SEC24B	9	4.4	253	3.8	6.5
TRAPPC8+VPS35	9	4.7	253	4.1	6.9
SEC22B+TMED2	9	4.5	253	3.9	6.6
SEC23B+SEC24A	9	4.6	253	4.1	6.8
BAG6+SEC22B	9	4.5	253	3.9	6.6
UGP2+VPS53	9	4.6	253	4.1	6.8
SEC24C+VCP	9	4.6	253	4	6.8
EIF3H+SEC23B	9	4.6	253	3.9	6.7
ERP44+SPCS3	9	4.7	253	4.2	7
ANAPC2+SEC23B	9	4.7	253	4	6.8
SEC23IP+SPCS3	9	4.7	253	4.3	7
TRAPPC8+VPS54	9	4.6	253	3.8	6.7
ASNA1+WRB	9	4.6	253	4	6.8
SEC23B+WDR43	9	4.7	253	3.7	6.7
EIF6+SEC24C	9	4.6	253	3.6	6.7
PPP1R8+SEC24C	9	4.6	253	4.2	6.9
SEC24B+SUCO	9	4.4	253	3.9	6.6
SEC24C+SGTA	9	4.6	253	4.1	6.8
SEC22B+TMED10	9	4.6	253	4	6.8
SPPL3+VPS52	9	4.5	253	3.8	6.6
SPPL3+TRAPPC5	9	4.4	253	3.9	6.6
SCFD1+SEC24C	9	4.4	253	3.9	6.6
SEC22B+WRB	9	4.5	253	4	6.6
CAMLG+TUBB	9	4.5	253	3.6	6.5
SEC22B+TRAPPC8	9	4.7	253	3.9	6.8
RTF1+SEC24C	9	4.7	253	4.3	7
SPPL3+VPS54	9	4.6	253	4	6.8
SPPL3+VPS53	9	4.5	253	3.9	6.6
PSMD2+SEC23B	9	4.4	253	3.7	6.5
PSMD11+UGP2	9	4.5	253	3.4	6.5
SEC24A+SEC24B	9	4.7	253	3.8	6.7
RPL35A+SUCO	9	4.5	253	3.5	6.5
PSMD11+SEC23IP	9	4.5	253	3.4	6.5
GET4+TRAPPC3	9	4.5	253	4.1	6.8
GET4+SEC24C	9	4.4	253	3.9	6.6
EIF3H+ERP44	9	3.2	253	2.7	5
SEC23IP+SPPL3	9	4.7	253	4.3	7
ASNA1+ST3GAL4	9	4.6	253	3.9	6.7
CAMLG+SEC24A	9	4.5	253	3.7	6.6
RPL35+SEC23B	9	4.5	253	4	6.7
SEC24C+STX5	9	4.5	253	4	6.7
ASNA1+NAA25	9	4.2	253	3.7	6.2
SUCO+TRAPPC5	9	4.5	253	3.8	6.6
TRAPPC11+VPS53	9	4.7	253	4.1	6.9
UGP2+VPS52	9	4.4	253	3.8	6.5
AKAP9+ASNA1	9	4.6	253	3.9	6.7
SEC23IP+TRAPPC5	9	4.5	253	3.9	6.7
CAMLG+PSMD2	9	4.2	252	3.5	6.2
SEC23B+UBR4	9	4.8	252	4.3	7.2
TRAPPC8+UGP2	9	5	252	4.5	7.4
SARS+SEC23B	9	4.9	252	4.5	7.4
SPPL3+UGP2	9	4.8	252	4.3	7.1
GET4+SEC22B	9	4.9	252	4	7.1
DCAF13+SEC23B	9	5	252	4.5	7.5
SEC24C+SF3B2	9	5	252	4.2	7.2
SEC23B+TRAPPC5	9	5	252	4.7	7.5
SAMM50+SEC23B	9	4.8	252	4.2	7.2
COPA+TRAPPC3	9	4.8	252	4.3	7.1
ASNA1+DCTN1	9	4.8	252	4.3	7.2
TRAPPC3+VPS53	9	4.9	252	4.2	7.2
SEC22B+SEC24B	9	5.1	252	4.6	7.6
PPP1R8+TRAPPC8	9	4.8	252	4	7
CAMLG+COPS4	9	4.8	252	4.4	7.2
MRPL51+SEC22B	9	5	252	4.2	7.3
ASNA1+COG3	9	4.6	252	3.8	6.7
BAG6+SEC23B	9	5.1	252	4.6	7.5
SEC24C+WDR3	9	4.9	252	4.1	7.2
SGTA+TRAPPC3	9	4.9	252	4.3	7.3
EIF3H+SEC22B	9	5	252	4.2	7.4
GMDS+MGAT5	9	5.1	252	4.7	7.6
ATP5A1+SEC22B	9	4.8	252	3.8	6.9
PSMC1+TRAPPC3	9	4.8	252	3.8	7
PSMD3+UGP2	9	4.7	252	3.6	6.8
ASNA1+RRS1	9	4.8	252	3.9	7
PSMB6+SEC24C	9	4.9	252	4.1	7.2
ANAPC2+SEC24C	9	5.1	252	4.4	7.5
SEC23B+SRP54	9	4.9	252	4.4	7.2
SRP54+TRAPPC8	9	4.8	252	4.2	7.1
SRP54+TRAPPC3	9	5	252	4.5	7.5
SRP54+TRAPPC5	9	3.1	252	2.8	4.7
ASNA1+PPP1R8	9	5	252	4.2	7.3
ASNA1+RPL35	9	4.8	252	4.1	7.1
CAMLG+SEC23B	9	5.1	252	4.7	7.6
COX7C+TRAPPC3	9	4.9	252	4.2	7.2
ASNA1+EIF3A	9	4.9	252	4.3	7.3
ASNA1+EIF3L	9	4.9	252	4.3	7.2
TRAPPC5+UGP2	9	5	252	4.4	7.4
ERP44+TRAPPC11	9	5	252	4.4	7.4
ATP5B+ERP44	9	5	252	3.9	7.2
SEC24A+TRAPPC3	9	4.9	252	4.4	7.2
SEC24A+TRAPPC8	9	4.9	252	4.5	7.3
PSMB6+TRAPPC3	9	4.8	252	4	7.1
CAMLG+UGP2	9	4.8	252	4.2	7.1
MRPL54+SUCO	9	3.6	252	3.1	5.4
SPPL3+TRAPPC11	9	4.9	252	4.4	7.3
STX5+TRAPPC3	9	4.9	252	4.1	7.1
MRPL54+SEC22B	9	5	252	4.3	7.4
RPL35+SEC22B	9	4.8	252	4	7.1
SEC23B+SF3B2	9	4.8	252	4.1	7
SEC23IP+VPS52	9	4.8	252	4	7
SEC23IP+VPS54	9	5	252	4.3	7.3
COG4+GMDS	9	5.1	252	4.6	7.5
GMDS+ST3GAL4	9	5	252	4.5	7.4
SEC24C+VPS52	9	5	252	4.6	7.4
GET4+VPS53	9	4.4	252	3.6	6.4
ASNA1+SEC24B	9	5	252	4	7.2
ASNA1+SEC24C	9	4.9	252	4.4	7.2
RPL4+TRAPPC3	9	5	252	3.9	7.2
SEC24B+SEC24C	9	4.8	252	4.4	7.2
NAA25+SEC23B	9	5	252	4.1	7.3
SF3A1+TRAPPC8	9	4.8	252	3.7	6.9
SEC24C+TRAPPC8	9	5.1	252	4.7	7.6
ERP44+SPPL3	9	5.1	252	4.7	7.6
GET4+SEC23B	9	4.8	252	4.2	7.1
MRPL54+SEC24C	9	4.8	252	4.1	7.1
SPPL3+SUCO	9	4.9	252	4.5	7.3
SEC22B+THOC5	9	4.7	252	4.1	6.9
SEC23IP+TRAPPC11	9	5	252	4.6	7.4
SEC24C+UTP20	9	5	252	4.2	7.3
TMED2+TRAPPC3	9	5.1	252	4.3	7.4
SEC24B+VPS53	9	5	252	4.2	7.3
THOC5+TRAPPC3	9	4.8	252	3.9	6.9
MYBL2+SUCO	9	5	252	4	7.3
AP2A1+SEC23B	9	4.9	252	4.4	7.3
CAMLG+SEC23IP	9	5.1	252	4.6	7.5
ERP44+SEC24A	9	4.8	252	4.4	7.2
ASNA1+COX7C	9	4.8	252	4.2	7
RTF1+TRAPPC8	9	4.9	252	4.3	7.3
KDM1A+SEC23B	9	5	252	4.1	7.2
SEC23B+SEC24C	9	5.1	252	4.6	7.5
EIF3D+SEC23B	9	4.8	252	4	7
TRAPPC3+WRB	9	4.9	252	4.2	7.2
ASNA1+PSMD2	9	4.9	252	4.3	7.3
CAMLG+SUCO	9	5	252	4.5	7.4
ASNA1+RPL7L1	9	5.1	252	4.4	7.4
RPL4+SEC24C	9	4.9	252	4.3	7.2
DCTN1+SEC23B	9	5	252	4.2	7.3
ASNA1+CCNA2	9	5	252	3.8	7.2
SEC24C+SPCS3	9	5	252	4.5	7.4
ATP5B+SEC23B	9	4.8	252	4.3	7.2
SF3A1+SPPL3	9	4.2	252	3.1	6.1
CAMLG+RPL7L1	9	4.8	252	3.8	7
BAG6+ERP44	9	4.8	252	3.8	6.9
ASNA1+SPPL3	9	4.9	252	4.5	7.3
TRAPPC8+VPS52	9	4.9	252	4.4	7.4
AP2A1+UGP2	9	5.1	252	4	7.3
ASNA1+WDR43	9	5	252	4.4	7.4
CAMLG+VPS35	9	5	252	4.5	7.4
CAMLG+SRPRB	9	5	252	4.3	7.4
ASNA1+PRPF39	9	4.9	252	4	7.1
PSMA7+TRAPPC8	9	4.7	252	3.6	6.8
SEC24C+SON	9	4.8	252	4	7.1
SPPL3+VCP	9	4.8	252	3.9	7
EIF3A+SEC23B	9	4.7	252	3.9	6.8
ASNA1+MRPL51	9	4.8	252	4.1	7
RRS1+SEC24C	9	4.9	252	4.3	7.2
ATP5B+TRAPPC3	9	5	252	4.2	7.4
SPPL3+TRAPPC3	9	5	252	4.6	7.4
SPPL3+TRAPPC8	9	4.8	252	4.4	7.2
RAB14+SEC24C	9	5	252	4.6	7.4
RPL35A+SEC24C	9	4.9	252	3.9	7.1
SEC22B+TTK	9	4.8	252	4.2	7.1
SEC23IP+SUCO	9	4.8	252	4.5	7.1
SEC24A+VPS53	9	5	252	4.4	7.3
DCAF13+TRAPPC8	9	5.1	252	4.1	7.3
PSMD11+SEC24C	9	4.8	252	4.2	7.2
SEC24C+SRP54	9	4.8	252	4.3	7.2
ASNA1+COPS4	9	4.8	252	4	7
RPL7L1+VPS53	9	5	252	3.9	7.3
ERP44+UGP2	9	5.1	252	4.6	7.5
ASNA1+TUBB	9	4.9	252	4.2	7.2
SUCO+UBR4	9	5	252	4.4	7.4
CCT4+UGP2	9	3.6	252	3.1	5.4
SEC23IP+TRAPPC8	9	4.9	252	4.5	7.3
SEC23IP+TRAPPC3	9	4.9	252	4.4	7.4
AP2A1+SEC24C	9	4.8	252	4.1	7.1
RPL7L1+TRAPPC8	9	5.4	251	4.3	7.8
CAMLG+MRPL54	9	5.1	251	4.3	7.4
COG3+GMDS	9	5.5	251	4.8	8.1
ASNA1+UGP2	9	5.3	251	4.5	7.7
RPS6+TRAPPC3	9	5.4	251	4.6	7.9
ASNA1+ERP44	9	5.2	251	4.7	7.6
SCFD1+TRAPPC8	9	5.3	251	4.5	7.8
SCFD1+TRAPPC3	9	5.4	251	4.8	8
TRAPPC3+WDR3	9	5.3	251	4.3	7.7
GMDS+HNRNPK	9	5.2	251	4.6	7.6
CCT3+SEC24C	9	5.4	251	4.7	7.8
CAMLG+TRAPPC3	9	5.4	251	4.7	7.9
CAMLG+SPPL3	9	5.1	251	4.6	7.5
SEC24C+SRPRB	9	5.1	251	4.2	7.3
RPL4+SEC23B	9	5.1	251	4.4	7.5
SEC23B+SPCS3	9	5.4	251	4.9	8
SEC22B+SEC24C	9	5.1	251	4.4	7.4
ERP44+PSMD2	9	2.8	251	2.2	4.3
CHAF1A+SEC23B	9	5.2	251	4.6	7.7
EIF3L+SEC22B	9	5.2	251	4.4	7.5
ASNA1+ATP5A1	9	5.2	251	4.3	7.5
SEC23B+VPS52	9	5.1	251	4.7	7.6
PSMD1+SEC24C	9	5.1	251	4.4	7.5
ASNA1+EIF3H	9	5.2	251	4.6	7.7
SUCO+VPS53	9	5.4	251	4.9	8
ASNA1+SUCO	9	5.1	251	4.5	7.5
CAMLG+SF3B2	9	5.2	251	4.3	7.5
TRAPPC8+WDR3	9	5.2	251	4.4	7.6
ASNA1+GET4	9	5.1	251	4.1	7.3
ASNA1+TRAPPC3	9	5.2	251	4.3	7.4
SEC23B+VPS35	9	5.2	251	4.8	7.8
SEC24A+SRP54	9	2.9	251	2.4	4.4
SEC24C+SPPL3	9	5.3	251	4.8	7.8
DCTN1+SEC24C	9	5.2	251	4.7	7.7
ASNA1+SPCS3	9	5.3	251	4.8	7.9
SEC24C+SPATA5L1	9	5.2	251	4.5	7.7
SEC22B+SPATA5L1	9	5.3	251	4.2	7.7
MRPL51+TRAPPC8	9	5.3	251	4.2	7.7
MRPL51+TRAPPC3	9	5.2	251	4.3	7.5
SEC23B+SEC23IP	9	5.2	251	4.8	7.7
CAMLG+DCAF13	9	5.1	251	4.5	7.6
SARS+TRAPPC3	9	5.2	251	4.6	7.7
ASNA1+RPS6	9	5.3	251	4.4	7.7
CCNA2+GMDS	9	5.3	251	4.8	7.8
RTF1+SEC23B	9	5.4	251	4.6	7.9
DCTN1+TRAPPC8	9	5.1	251	4.1	7.3
DCTN1+SEC23IP	9	5.3	251	4.1	7.7
CCT4+SEC23B	9	5.4	251	4.2	7.8
SEC23IP+VPS53	9	5.5	251	5.1	8.2
ERP44+TRAPPC8	9	5.2	251	4.8	7.6
TRAPPC11+TRAPPC3	9	5.3	251	4.5	7.7
MRPL54+TRAPPC3	9	5.1	251	4.2	7.4
TRAPPC3+UBR4	9	5.4	251	4.6	7.9
SAMM50+SEC24C	9	5.2	251	4.3	7.5
ASNA1+VCP	9	5.4	251	4.8	8
AP2A1+TRAPPC11	9	5.4	251	4.5	7.9
PRPF39+SEC22B	9	5.1	251	4.3	7.4
PSMD1+TRAPPC3	9	3.9	251	3.1	5.7
SEC24C+TRAPPC5	9	5.1	251	4.4	7.4
SEC24C+TRAPPC3	9	5.2	251	4.7	7.6
SEC23B+UTP20	9	5.1	251	4.5	7.5
CHAF1A+SEC24C	9	5.1	251	4.2	7.3
ASNA1+VPS52	9	5.4	251	4.5	7.8
SEC22B+UGP2	9	5.1	251	4.6	7.5
ERP44+SEC24C	9	5.4	251	5.1	8.1
MRPL51+SEC23B	9	5.3	251	4.3	7.7
ASNA1+HNRNPK	9	5.4	251	4.4	7.8
ERP44+VPS53	9	5.2	251	4.5	7.6
SEC23IP+UGP2	9	5.1	251	4.7	7.6
ASNA1+RAB14	9	5.1	251	4.3	7.5
ANAPC2+SPCS3	9	3.7	251	3.1	5.5
SUCO+UGP2	9	5.2	251	4.8	7.7
EIF6+TRAPPC8	9	5.3	251	4.6	7.9
ASNA1+BAG6	9	5.3	251	4.5	7.8
DCAF13+SEC24C	9	5.1	251	4.2	7.3
SEC23B+STX5	9	5.2	251	4.7	7.6
EIF3H+TRAPPC8	9	5.1	251	4.1	7.4
COX7C+SEC22B	9	5.3	251	4.5	7.7
RAB14+SEC23B	9	5.2	251	4.8	7.7
SPCS3+TRAPPC8	9	5.3	251	4.8	7.9
SEC24C+TRAPPC11	9	5.3	251	4.8	7.9
SEC23B+SUCO	9	5.5	251	5.1	8.1
PSMD3+SEC22B	9	5.3	251	4.3	7.7
PSMA7+SEC23B	9	5.2	251	4.3	7.5
ASNA1+MRPL54	9	5.3	251	4.3	7.7
SEC22B+TRAPPC5	9	5.2	251	4.5	7.6
SEC23IP+SEC24C	9	5.3	251	4.7	7.7
CAMLG+IFFO1	9	4.5	251	3.9	6.6
GMDS+PRPF39	9	5.5	251	5	8.1
IFFO1+SEC24C	9	5.4	251	4.2	7.8
CCT4+SEC24C	9	5.2	251	4.3	7.5
SEC24C+TTK	9	5.2	251	4.7	7.7
CCT4+SEC22B	9	5.3	251	4.5	7.7
TRAPPC8+UBA3	9	5.1	251	4.5	7.6
SEC23B+TRAPPC11	9	5.4	251	5	8
SPCS3+SUCO	9	5.4	251	4.9	8.1
TRAPPC11+UGP2	9	5.3	251	4.7	7.8
TRAPPC3+UGP2	9	5.4	251	4.7	7.8
BAG6+CAMLG	9	5.2	251	4.3	7.6
CAMLG+EIF3H	9	5.3	251	4.6	7.8
ERP44+SEC23IP	9	5.1	251	4.8	7.6
SUCO+TRAPPC8	9	5.1	251	4.7	7.6
SUCO+TRAPPC3	9	5.1	251	4.7	7.6
CAMLG+ERP44	9	5.1	251	4.6	7.6
RPL7L1+TRAPPC3	9	5.6	250	4.8	8.2
GET4+GMDS	9	5.7	250	5.2	8.3
ASNA1+TRAPPC11	9	5.5	250	4.7	8
SEC23B+TRAPPC8	9	5.5	250	5.1	8.2
SEC23B+TRAPPC3	9	5.7	250	5.1	8.3
GMDS+SPPL3	9	5.7	250	5.4	8.5
ASNA1+DCAF13	9	5.7	250	4.8	8.1
SEC22B+VPS53	9	5.5	250	4.9	8.1
ASNA1+SEC23B	9	5.7	250	5	8.2
SEC24C+SUCO	9	5.5	250	5.1	8.1
SRPRB+VPS53	9	4.2	250	3.6	6.2
SEC23B+VPS54	9	5.6	250	4.8	8.1
SEC23B+VPS53	9	5.7	250	5.3	8.4
GMDS+SMC3	9	5.7	250	4.9	8.3
SEC22B+SUCO	9	5.6	250	5.1	8.4
GMDS+PTPN1	9	5.5	250	4.8	8.1
ATP5B+SEC24C	9	5.8	250	4.8	8.4
EIF3H+SEC24C	9	5.8	250	4.9	8.4
ASNA1+TRAPPC5	9	5.5	250	4.5	7.9
ASNA1+CAMLG	9	5.7	250	5.1	8.4
RRM1+SEC23B	9	5.5	250	4.5	8
TRAPPC3+UBA3	9	5.6	250	4.7	8.1
COPS4+GMDS	9	5.7	250	5.3	8.5
PSMD3+SEC23B	9	5.8	250	4.7	8.3
SEC23B+SPPL3	9	5.7	250	5.1	8.3
EIF6+SEC23B	9	5.7	250	4.6	8.2
SEC24C+SNRPD3	9	5.7	250	4.6	8.2
ASNA1+SRPRB	9	5.7	250	4.9	8.3
GMDS+MRPL54	9	5.8	250	5.1	8.4
MYBL2+SEC23B	9	5.6	250	4.5	8.1
GMDS+THOC5	9	5.7	250	5.2	8.4
GMDS+PPP1R8	9	5.6	250	5.1	8.3
SARS+TRAPPC8	9	5.5	250	4.3	7.9
PPP1R8+TRAPPC11	9	5.5	250	4.3	7.9
GMDS+PSMA7	9	5.5	250	5.1	8.2
SEC23B+SRPRB	9	5.5	250	4.6	7.9
SUCO+TRAPPC11	9	5.7	250	4.9	8.3
SEC22B+SPCS3	9	5.5	250	4.6	7.9
SEC24C+VPS53	9	5.8	250	5.2	8.4
ERP44+TRAPPC3	9	5.5	250	5	8.1
COX7C+ERP44	9	4	250	3.3	6
AKAP9+GMDS	9	5.7	250	5.2	8.4
COPA+GMDS	9	5.8	250	5.2	8.6
CAMLG+SPCS3	9	5.6	250	4.7	8
GMDS+SPATA5L1	9	5.5	250	4.9	8
CCT3+SEC23B	9	5.8	250	4.7	8.4
CAMLG+UBR4	9	4.7	250	4.2	7
COPS4+SEC22B	9	5.6	250	4.7	8.1
GMDS+SRP54	9	5.9	250	5.6	8.7
GMDS+GOLIM4	9	5.5	250	5.1	8.2
ASNA1+VPS53	9	5.5	250	4.8	8.1
GMDS+STX5	9	5.7	250	5.3	8.4
SEC23B+UGP2	9	5.7	250	5.3	8.4
CAMLG+TRAPPC11	9	5.7	250	4.9	8.2
ATP5A1+GMDS	9	5.6	250	5.1	8.3
SEC22B+SPPL3	9	5.6	250	5	8.2
ANAPC2+GMDS	9	5.8	250	5.3	8.6
GMDS+TUBB	9	5.5	250	5.1	8.1
SEC23B+WDR3	9	5.6	250	4.8	8.1
SUCO+VCP	9	3.8	250	3.1	5.7
SARS+VPS53	9	5.5	250	4.3	7.9
COPS4+VPS53	9	3.8	250	3.2	5.7
ASNA1+VPS35	9	5.5	250	4.7	8
ASNA1+UTP20	9	5.5	250	4.4	7.9
SEC23B+TTK	9	5.7	250	4.8	8.2
EIF3A+GMDS	9	5.7	250	5.2	8.4
ASNA1+SF3B2	9	5.6	250	4.6	8.1
ASNA1+SEC23IP	9	5.6	250	5	8.2
CAMLG+COX7C	9	5.6	250	4.7	8.1
CAMLG+SEC22B	9	5.8	250	4.6	8.4
SEC22B+TRAPPC3	9	5.5	250	4.8	8.1
SEC24C+UGP2	9	5.5	250	5.1	8.2
GMDS+PSMD11	9	5.7	250	5.1	8.3
ASNA1+SARS	9	5.7	250	4.6	8.2
EIF3L+GMDS	9	5.8	250	5.4	8.5
RPL7L1+SEC24C	9	5.4	250	4.6	8
VPS35+VPS54	9	5.6	250	4.6	8.1
VPS35+VPS53	9	5.7	250	5.1	8.4
GMDS+PSMD3	9	5.6	250	5.2	8.3
GMDS+RPL35	9	5.7	250	5.3	8.4
RRS1+TRAPPC3	9	5.5	250	4.7	8
PPP1R8+VPS52	9	3.3	250	2.7	5
ERP44+SEC23B	9	5.8	250	5.4	8.5
COX7C+GMDS	9	6.2	249	5.5	9
SEC22B+VPS52	9	5.3	249	4.6	7.6
GMDS+SCFD1	9	6	249	5.4	8.7
SEC24C+UBA3	9	5.9	249	5	8.6
EIF6+GMDS	9	6.1	249	4.9	8.7
GMDS+TRAPPC8	9	6.2	249	5.8	9.1
GMDS+TRAPPC5	9	6.1	249	5.7	9
CAMLG+TRAPPC5	9	5.9	249	5.1	8.7
SPCS3+STX5	9	4.3	249	3.7	6.4
TRAPPC3+VPS54	9	5.8	249	5	8.5
PPP1R8+TRAPPC3	9	5.9	249	4.7	8.5
DCTN1+GMDS	9	5.9	249	5.3	8.6
KDM1A+TRAPPC3	9	5.2	249	4	7.4
GMDS+SAMM50	9	6	249	5.3	8.8
GMDS+RRS1	9	6.2	249	5.6	9
GMDS+WRB	9	5.9	249	5.5	8.8
SEC23B+SF3A1	9	6.2	249	5.1	9
SCFD1+SEC23B	9	6.1	249	4.9	8.7
ASNA1+TRAPPC8	9	6	249	5.2	8.7
ASNA1+SNRPD3	9	6.1	249	5	8.9
GMDS+UGP2	9	6.2	249	5.8	9.1
GMDS+SARS	9	6.2	249	5.6	9.1
GMDS+KDM1A	9	6.1	249	5.4	8.8
BAG6+GMDS	9	6.1	249	5.5	8.9
GMDS+RPL7L1	9	6	249	5.5	8.9
GMDS+PSMC6	9	5.8	249	5.2	8.6
GMDS+PSMC1	9	5.9	249	5.3	8.7
SEC23B+SNRPD3	9	5.9	249	4.8	8.4
GMDS+UTP20	9	6.1	249	5.6	9
GMDS+UBA3	9	6.2	249	5.5	9
GMDS+SEC24B	9	6.2	249	5.6	9
GMDS+SEC24A	9	6.2	249	5.8	9.1
ERP44+SPATA5L1	9	2.9	249	2.5	4.5
TRAPPC3+TRAPPC8	9	5.9	249	4.7	8.5
GMDS+VPS52	9	6	249	5.5	8.9
GMDS+VPS54	9	6	249	5.5	8.9
SEC22B+SEC23B	9	6	249	5.5	8.9
GMDS+SNRPD3	9	5.9	249	5.3	8.7
GMDS+SRPRB	9	6.1	249	5.4	8.9
SARS+SEC22B	9	6	249	5.1	8.7
ERP44+SCFD1	9	4.8	249	4	7.1
GMDS+SGTA	9	5.9	249	5.5	8.7
SARS+SEC24C	9	6	249	4.9	8.7
CAMLG+GMDS	9	6	249	5.5	8.8
ERP44+SUCO	9	5.9	249	5.6	8.8
SEC23B+SON	9	5.8	249	4.7	8.5
SPCS3+TRAPPC3	9	6	249	4.9	8.7
TRAPPC8+VPS53	9	6.2	249	5.4	9.1
ATP5A1+CAMLG	9	4.1	249	3.7	6.1
COPB1+GMDS	9	5.9	249	5.1	8.7
GMDS+TMED10	9	6.1	249	5.7	9
GMDS+TTK	9	6	249	5.5	8.9
GMDS+PSMD1	9	5.8	249	5.2	8.6
GMDS+RAB14	9	6	249	5.5	8.8
GMDS+IFFO1	9	6.1	249	5.2	8.7
GMDS+PSMB6	9	6.1	249	5.6	8.9
EIF3H+GMDS	9	6	249	5.3	8.7
CAMLG+VPS54	9	6.1	249	5.2	8.8
CAMLG+VPS53	9	6	249	5	8.6
ARL1+GMDS	9	6.2	249	5.2	8.9
GMDS+RTF1	9	6.1	249	5.5	8.8
GMDS+RPL35A	9	5.9	249	5.4	8.7
GMDS+RPL4	9	5.8	249	5.3	8.6
SEC24C+WDR43	9	6.1	249	5	8.7
CCT4+GMDS	9	6	249	5.2	8.7
SEC22B+SRP54	9	5.8	249	4.8	8.4
PSMD11+TRAPPC3	9	6.5	248	5.3	9.4
GMDS+SF3B2	9	6.6	248	5.9	9.6
GOLIM4+SEC22B	9	6.4	248	5.2	9.2
GMDS+TRAPPC3	9	6.5	248	6	9.5
GMDS+WDR3	9	6.6	248	5.8	9.6
SCFD1+SUCO	9	4.6	248	3.9	6.8
GMDS+VCP	9	6.6	248	5.8	9.6
GMDS+TMED2	9	6.3	248	5.7	9.2
GMDS+NAA25	9	6.5	248	5.6	9.5
GMDS+SEC22B	9	6.5	248	5.9	9.5
GMDS+MRPL51	9	6.2	248	5.4	9
CHAF1A+GMDS	9	6.5	248	5.8	9.5
PRPF39+TRAPPC3	9	4.6	248	4.1	6.8
TMED10+VPS53	9	3.4	248	2.8	5.1
GMDS+SEC24C	9	6.4	248	6	9.4
GMDS+PSMD2	9	6.3	248	5.3	9.1
SEC24C+VPS54	9	6.5	248	5.3	9.3
GMDS+VPS53	9	6.5	248	5.6	9.4
GMDS+SEC23IP	9	6.3	248	6	9.4
GMDS+VPS35	9	6.5	248	5.8	9.5
AP2A1+GMDS	9	6.2	248	5.3	9
ERP44+GMDS	9	6.4	248	5.9	9.4
GMDS+TRAPPC11	9	6.2	248	5.8	9.1
SUCO+TUBB	9	3.9	248	3.1	5.7
EIF3D+GMDS	9	6.3	248	5.5	9.2
GMDS+RRM1	9	6.4	248	5.7	9.3
GMDS+SEC23B	9	6.6	248	6.2	9.7
ASNA1+GMDS	9	6.6	248	5.8	9.6
GMDS+MYBL2	9	6.4	248	5.6	9.3
GMDS+RPS6	9	6.5	248	5.6	9.4
TRAPPC3+VPS35	9	6.4	248	5.4	9.2
GMDS+SUCO	9	6.6	248	6.2	9.8
SEC23B+VCP	9	6.7	247	5.9	9.8
EIF3A+SEC22B	9	4.9	247	4.2	7.2
CAMLG+DCTN1	9	4.8	247	4	7
CCT3+GMDS	9	6.9	247	5.9	9.9
DCAF13+GMDS	9	6.9	247	5.9	10
ATP5B+SUCO	9	3.6	247	2.9	5.3
SEC23IP+SF3A1	9	3.5	247	2.8	5.2
THOC5+VPS53	9	3.6	247	2.8	5.3
SUCO+TTK	9	4.4	247	3.7	6.6
ERP44+SEC22B	9	6.7	247	5.6	9.6
GMDS+WDR43	9	6.8	247	6.1	9.9
GMDS+UBR4	9	6.8	247	5.7	9.7
ATP5B+GMDS	9	6.9	247	6.1	10
PSMD3+SEC23IP	9	3.2	247	2.7	4.9
SPPL3+WDR3	9	4.5	247	3.6	6.6
SEC24A+SEC24C	9	7	247	5.8	10
GMDS+SON	9	7.1	247	5.9	10.2
EIF3A+TRAPPC3	9	5.2	246	4.1	7.5
ASNA1+SAMM50	9	5	246	4.4	7.4
UGP2+WRB	9	4	246	3.4	6
GMDS+SF3A1	9	7.5	246	6.3	10.7
PSMC1+SEC23IP	9	3.7	246	2.5	5.4
SEC24B+VPS54	9	3.2	246	2.6	4.7
SEC24A+VPS52	9	3.8	246	3.3	5.7
PSMD11+TRAPPC5	9	4.1	245	3.5	6.1
COX7C+TRAPPC5	9	3.1	245	2.5	4.7
PSMA7+SPPL3	9	4.5	245	3.3	6.4
GMDS+SPCS3	9	7.7	245	6.5	11
ERP44+SAMM50	9	4.1	244	3.3	6
ASNA1+SMC3	9	4.6	244	3.4	6.5
COPS4+ERP44	9	3.4	244	2.9	5.2
ASNA1+UBA3	9	4.3	244	3.8	6.5
TMED2+TRAPPC11	9	4.1	244	3.5	6.1
SGTA+UGP2	9	3.9	244	3.3	5.8
BAG6+SEC24A	9	3	244	2.5	4.6
ANAPC2+ASNA1	9	4.5	244	4	6.7
PSMD11+SUCO	9	4.2	243	3.3	6.2
CAMLG+PPP1R8	9	4.7	243	3.9	6.9
COPA+SEC23B	9	5.2	243	4.2	7.5
BAG6+UGP2	9	4	243	3.5	6
PSMA7+TRAPPC3	9	4.9	243	4.2	7.3
IFFO1+SEC22B	9	4.5	243	3.8	6.7
CAMLG+EIF3L	9	5.1	243	4.4	7.4
AP2A1+SUCO	9	3.3	243	2.8	4.9
UBA3+VPS53	9	4.8	243	3.8	7
MRPL54+SPPL3	9	3.2	242	2.7	5
IFFO1+TRAPPC3	9	4.5	242	3.8	6.6
AKAP9+SUCO	9	2.7	242	2.2	4.1
CAMLG+UTP20	9	4.9	242	4	7.1
RPL4+SUCO	9	4.2	242	3.6	6.2
ST3GAL4+VPS53	9	2.6	241	2.2	4
RRS1+SUCO	9	5	241	4	7.2
EIF3D+SEC23IP	9	3.7	241	2.9	5.5
ERP44+KDM1A	9	3.2	241	2.8	4.8
SEC24A+VCP	9	2.5	241	2.1	3.9
EIF3H+SEC23IP	9	4.2	241	3.2	6.1
SRP54+VPS53	9	4.7	240	4	6.9
COPA+SEC23IP	9	3.3	240	2.6	5
COPS4+SPCS3	9	3.7	240	2.9	5.5
RPL7L1+SUCO	9	4.2	240	3.3	6.1
SPPL3+TMED10	9	2.8	240	2.1	4.2
SF3A1+TRAPPC5	9	3.2	240	2.6	4.8
ERP44+PSMA7	9	3.5	240	2.7	5.2
ANAPC2+ERP44	9	3.4	240	2.8	5.1
SEC24A+VPS54	9	4	240	3.4	6
UGP2+UTP20	9	4.3	240	3.7	6.4
ANAPC2+SUCO	9	3.6	240	3	5.4
PRPF39+SEC23IP	9	2.7	240	2.2	4.2
ASNA1+RPL4	9	4.1	239	3.5	6
SUCO+VPS35	9	5	239	3.8	7.2
DCAF13+SPPL3	9	4.5	239	3.4	6.5
ERP44+SF3B2	9	4.6	239	3.8	6.8
RPL4+SPPL3	9	3.4	239	2.8	5.2
BAG6+SEC24B	9	3.7	239	2.8	5.5
PPP1R8+SEC24B	9	3.3	239	2.4	4.9
CAMLG+SCFD1	9	5.7	239	4.5	8.2
CAMLG+CHAF1A	9	6.1	239	5	8.8
SPPL3+STX5	9	3.8	239	3.1	5.6
PSMD3+TRAPPC3	9	4.6	238	3.9	6.8
COPS4+SPPL3	9	3.1	238	2.7	4.7
ASNA1+PSMD3	9	4.3	238	3.7	6.4
SPCS3+SRP54	9	3.5	238	2.8	5.2
CAMLG+SPATA5L1	9	5	238	4.2	7.3
SEC23IP+UTP20	9	3.9	238	3.3	5.8
ANAPC2+SEC23IP	9	2.8	238	2.3	4.4
GET4+SEC24A	9	2.7	238	2.3	4.1
CAMLG+EIF3A	9	5.4	238	4.6	8
EIF3D+SPPL3	9	4	237	3.2	5.9
SEC23IP+TTK	9	3.4	237	2.7	5.1
PSMD2+TRAPPC8	9	4.1	237	3.1	5.9
SPPL3+TUBB	9	3	237	2.5	4.6
CAMLG+PTPN1	9	5.2	237	4.1	7.5
RPL4+TRAPPC8	9	4.1	237	3.3	6
SCFD1+SPPL3	9	5.3	237	4.4	7.7
SF3B2+TRAPPC8	9	3.9	237	3.1	5.8
ERP44+PSMC1	9	2.9	237	2.3	4.4
RRS1+TRAPPC8	9	4.3	237	3.7	6.3
SCFD1+SEC24A	9	3.7	237	3.1	5.5
EIF3H+SUCO	9	3.7	237	3.1	5.5
PPP1R8+SPPL3	9	3.5	237	2.9	5.3
DCTN1+SPPL3	9	4.3	237	3.2	6.2
EIF3A+TRAPPC8	9	3.8	236	3.2	5.7
SGTA+TRAPPC5	9	2.6	236	2.2	4
RTF1+SPPL3	9	4.4	236	3.6	6.5
SNRPD3+TRAPPC3	9	4.8	236	4	7
COX7C+TRAPPC11	9	4.3	236	3.7	6.5
CAMLG+SGTA	9	3.4	236	2.7	5.1
STX5+VPS53	9	4.4	236	3.8	6.6
CCT4+ERP44	9	3	235	2.4	4.5
RRM1+SEC23IP	9	4.4	235	3.6	6.5
HNRNPK+TRAPPC8	9	3.9	235	3	5.7
DCAF13+ERP44	9	4.9	235	3.7	7.1
SUCO+UTP20	9	4	235	3.6	6.1
ERP44+RPS6	9	4.8	235	4	7
CAMLG+PSMA7	9	4.5	235	3.7	6.6
SF3A1+TRAPPC3	9	4.8	235	4.2	7.1
SF3B2+SUCO	9	3.8	235	3.2	5.7
SNRPD3+SUCO	9	3.7	235	3.1	5.7
COX7C+VPS53	9	4.4	235	3.6	6.5
SF3A1+SUCO	9	3.9	235	3.4	5.9
PSMD1+VPS53	9	3.6	234	3	5.4
ERP44+RPL7L1	9	3.9	234	3.1	5.8
ERP44+RRM1	9	3.2	234	2.8	4.9
EIF3D+TRAPPC8	9	3.5	234	3	5.3
RPL35A+VPS53	9	4.8	234	3.9	7
SPPL3+TTK	9	4.2	234	3.4	6.1
GET4+UGP2	9	3.4	234	3	5.3
EIF6+TRAPPC3	9	4.1	234	3.4	6.1
ATP5A1+VPS53	9	4.3	234	3.4	6.3
ASNA1+TTK	9	5.7	234	4.8	8.2
DCAF13+TRAPPC3	9	4.4	234	3.6	6.5
PSMC6+TRAPPC8	9	3.9	233	2.8	5.6
ANAPC2+UGP2	9	3.6	233	2.9	5.4
SPPL3+SRPRB	9	3.2	233	2.7	4.8
ASNA1+ATP5B	9	4.6	233	4	6.8
ATP5A1+SEC24A	9	2.5	233	2	3.8
CCNA2+VPS53	9	3.1	233	2.6	4.7
AP2A1+ASNA1	9	4.2	233	3.7	6.2
SEC24B+VPS52	9	3.7	233	2.9	5.4
CAMLG+RTF1	9	4.5	233	3.9	6.7
IFFO1+SUCO	9	3.3	233	2.9	5.1
MRPL54+SPCS3	9	3.8	233	3	5.7
COG4+TRAPPC8	9	3.2	233	2.6	4.8
ERP44+TUBB	9	3.3	233	2.8	4.9
NAA25+SEC24C	9	4.8	233	4.1	7.1
RPL4+UGP2	9	4.4	233	3.4	6.4
PSMD3+TRAPPC8	9	5.2	232	4.4	7.6
SEC24B+SRP54	9	2.2	232	1.8	3.5
CCT4+SEC23IP	9	2.8	232	2.3	4.3
AKAP9+SEC22B	9	4.2	232	3.4	6.2
KDM1A+SPPL3	9	3.9	232	3	5.7
PSMC6+SUCO	9	3.9	232	2.9	5.6
PSMC1+SUCO	9	3.6	232	3	5.4
PSMB6+SEC23B	9	5.3	232	4.7	7.9
SPATA5L1+TRAPPC3	9	4.3	232	3.6	6.4
CAMLG+SEC24B	9	5	232	4.4	7.4
RRM1+SUCO	9	4.2	232	3.4	6.1
RPL7L1+SEC22B	9	4.1	231	3.4	6
PSMD11+TRAPPC8	9	4.8	231	3.8	6.9
COG3+SEC24C	9	4.4	231	3.8	6.5
SAMM50+TRAPPC3	9	5.3	231	4.3	7.8
RPL35A+SPPL3	9	4.1	231	3.2	6
RTF1+SEC23IP	9	3.4	231	3	5.2
CAMLG+WRB	9	5.5	231	4.5	7.9
SARS+SEC23IP	9	4.9	231	4.3	7.3
TUBB+VPS53	9	4.2	231	3.5	6.1
TRAPPC5+WRB	9	3.7	231	3	5.6
RPL35A+TRAPPC3	9	4.5	231	3.9	6.7
ASNA1+VPS54	9	6	231	5.2	8.8
EIF3H+TRAPPC11	9	3.8	231	3	5.6
PSMC6+TRAPPC3	9	4.9	230	3.7	7.1
EIF3H+UGP2	9	3.9	230	3.2	5.8
EIF3L+SPPL3	9	2.6	230	2.2	4
IFFO1+VPS53	9	4.6	230	3.4	6.6
CAMLG+CCNA2	9	3.7	230	3	5.5
HNRNPK+SUCO	9	3.2	230	2.5	4.7
SEC24A+UTP20	9	2.8	230	2.4	4.4
COPS4+UGP2	9	3.4	230	2.8	5.1
ASNA1+SRP54	9	4.8	230	4.1	7.1
SF3B2+SPPL3	9	3.5	230	2.8	5.2
SPATA5L1+TRAPPC11	9	4.1	230	3.2	6
SEC24B+SPCS3	9	4.1	230	3.5	6.1
CAMLG+GOLIM4	9	4.3	230	3.7	6.5
SEC23B+SMC3	9	4.5	230	3.6	6.6
SEC24A+WRB	9	2.8	230	2.1	4.1
RRS1+SEC23IP	9	3.9	230	3.3	5.8
PRPF39+VPS53	9	4.6	230	3.8	6.7
SF3B2+UGP2	9	4.3	230	3.4	6.3
SEC23IP+SF3B2	9	4	230	3.1	5.9
CAMLG+SARS	9	6.6	230	5.4	9.5
RPL35+VPS53	9	3.5	230	3.1	5.3
SPCS3+UBR4	9	3.8	230	3.3	5.8
BAG6+SPCS3	9	4.1	230	3.3	6
AP2A1+TRAPPC5	8	3.2	229	2.4	5
CAMLG+THOC5	9	4.6	229	4	6.8
DCTN1+SEC24A	9	4.7	229	3.9	6.9
SPATA5L1+SPCS3	9	3.4	229	2.8	5.1
PTPN1+TRAPPC8	9	3.4	229	2.8	5.1
COX7C+SUCO	9	3.7	229	3.2	5.6
SPPL3+VPS35	9	4.5	229	3.3	6.5
MRPL54+UGP2	9	3.2	228	2.8	5
ATP5A1+SCFD1	8	3.4	228	2.8	5.4
SEC24C+SMC3	9	4.2	228	3.4	6.1
EIF3D+TRAPPC3	9	5.3	228	4.1	7.5
TMED2+VPS53	9	3.9	228	2.9	5.7
ERP44+PRPF39	9	2.6	228	2.1	4.1
CCT4+TRAPPC8	8	3.6	228	3	5.6
GOLIM4+ST3GAL4	9	-3.5	228	-5.3	-2.9
SGTA+VPS53	9	3.7	228	3.2	5.6
COG4+TRAPPC3	9	3.8	228	3	5.6
RRS1+SEC23B	9	5.2	228	4.4	7.5
TRAPPC11+TUBB	9	3.6	228	2.8	5.3
MRPL51+TRAPPC11	9	4.5	228	3.8	6.7
NAA25+TRAPPC8	8	3.8	227	3.3	5.8
NAA25+TRAPPC3	9	5	227	4	7.2
TRAPPC5+UBR4	8	3.7	227	3	5.6
PPP1R8+SPCS3	8	3.7	227	3.1	5.7
SNRPD3+SPPL3	9	3.4	227	2.7	5.2
SEC24A+SRPRB	9	2.9	227	2.3	4.5
ASNA1+SON	9	5.4	227	4.7	8
SMC3+TRAPPC3	9	4	227	3	5.8
SPPL3+UTP20	8	3.7	227	3.1	5.7
PSMD11+TRAPPC11	8	3.8	227	3.2	6
TRAPPC3+WDR11	8	3.8	227	2.9	5.8
ATP5A1+TRAPPC5	9	3.2	227	2.4	4.8
CHAF1A+SUCO	9	4.3	227	3.5	6.4
MYBL2+SEC24C	9	4.8	227	3.9	7
SEC22B+SON	8	4.2	226	3.5	6.4
RPL7L1+TRAPPC11	8	4.3	226	3.6	6.5
SPPL3+UBA3	8	4	226	3.3	6.2
PRPF39+TRAPPC11	9	3.3	226	2.9	5.1
SEC22B+STX5	9	6	226	4.9	8.7
EIF3D+SUCO	8	3.8	226	2.9	5.8
SEC23IP+SMC3	9	4.6	226	3.4	6.6
RPL7L1+SPCS3	8	4	226	3.3	6.2
VPS53+WDR3	8	3.9	226	3.1	6.1
CCT3+TRAPPC3	8	4.1	226	3.4	6.3
PSMB6+TRAPPC8	8	4	226	3.6	6.3
DCTN1+TRAPPC11	8	4.2	226	3.6	6.4
PSMC1+VPS53	9	3.8	226	3.1	5.7
CAMLG+EIF6	9	3.9	226	3.2	5.8
DCAF13+VPS53	8	3.9	226	3.4	6.2
ARL1+SEC22B	8	4.2	226	3.6	6.5
ERP44+RRS1	9	4.5	226	3.7	6.7
COPA+SPPL3	9	4.2	226	3.4	6.1
SEC23IP+THOC5	9	3.1	226	2.7	4.7
AP2A1+SPPL3	9	5	226	3.8	7.2
PSMD1+SEC23IP	9	3.2	225	2.6	4.8
RTF1+SUCO	9	3.8	225	3.2	5.8
MYBL2+TRAPPC3	8	4.6	225	4.1	7.1
ASNA1+PSMC6	8	4.4	225	3.5	6.6
SEC23B+WDR11	8	4.4	225	3.6	6.8
SEC24C+UBR4	9	5.1	225	4.5	7.5
PSMC1+SEC22B	8	4.5	225	3.8	6.9
SPCS3+VPS52	8	4.5	225	3.5	6.8
SPCS3+VPS53	8	4.6	225	3.7	6.9
SRPRB+TRAPPC11	8	4.5	225	3.7	7
SAMM50+VPS53	8	4.3	225	3.7	6.6
SAMM50+SEC23IP	8	4.3	225	3.4	6.5
AP2A1+VPS53	8	4.2	225	3.4	6.4
TRAPPC3+VCP	8	4.3	225	3.6	6.7
TRAPPC8+UTP20	8	4.4	225	3.9	6.9
SEC24B+SRPRB	9	3.3	225	2.5	4.9
UGP2+VPS35	9	4.4	225	3.5	6.4
PSMD3+VPS53	8	4.5	225	3.7	6.9
RPS6+SEC23B	9	6	225	4.9	8.8
TRAPPC5+VPS35	8	4.1	225	3	6.1
SEC23B+UBA3	8	4.5	225	4	7
SEC22B+SGTA	9	4.4	225	3.8	6.6
TRAPPC11+VPS52	8	4.3	225	3.7	6.5
TRAPPC11+VPS54	9	5.5	225	4.5	8
CCNA2+SEC22B	9	4.8	224	3.7	7
RRM1+TRAPPC3	8	4.8	224	4.1	7.4
RRM1+TRAPPC8	8	4.9	224	4.1	7.5
CAMLG+RPL35A	9	5.2	224	4.3	7.4
KDM1A+TRAPPC11	9	3.6	224	2.8	5.4
SRPRB+TRAPPC8	8	4.7	224	4.1	7.2
NAA25+UGP2	9	3.9	224	3	5.8
PSMD1+SEC22B	8	4.7	224	4	7.2
TRAPPC3+WDR43	8	5	224	4.2	7.6
SMC3+SUCO	9	3.1	224	2.4	4.6
RPS6+SEC24C	8	4.9	224	4.2	7.6
RRS1+UGP2	9	4.6	224	3.7	6.7
SPCS3+SRPRB	8	4.7	224	3.5	7
SPATA5L1+SUCO	9	3.9	224	3.1	5.7
ASNA1+PSMD1	8	4.7	224	3.9	7.1
CCT4+TRAPPC3	8	4.7	224	3.7	7.1
ASNA1+RRM1	8	4.8	224	4.1	7.5
SNRPD3+VPS53	9	4.2	224	3.2	6.1
COPA+SEC22B	8	4.7	224	3.6	7
SNRPD3+TRAPPC8	9	4.9	224	4.2	7.3
CAMLG+PSMD3	9	5.6	223	4.5	8.1
SPCS3+TRAPPC11	8	5.1	223	4.2	7.6
SCFD1+SPCS3	8	5.1	223	4.3	7.7
MGAT5+SEC24C	9	2.9	223	2.1	4.4
UBA3+UGP2	9	4.2	223	3.3	6.2
MYBL2+TRAPPC8	8	5	223	4.2	7.7
ASNA1+WDR11	8	5	223	3.9	7.5
ASNA1+SF3A1	8	5.2	223	4.5	8
UBR4+VPS53	8	5.2	223	4	7.7
SEC22B+WDR43	8	5.4	223	4.4	8.2
CCNA2+SEC23IP	9	3	223	2.4	4.6
PPP1R8+UGP2	9	3.4	223	2.7	5.1
SEC24C+SF3A1	8	5.2	223	4.4	7.8
MYBL2+VPS53	8	5.4	223	4.2	8.2
RRM1+SEC24C	8	5.2	223	4.7	8
CHAF1A+SEC22B	8	5.1	223	4.5	7.8
CAMLG+RPL35	9	4.5	223	4	6.8
ASNA1+RPL35A	9	4.7	223	4.1	7
ERP44+TTK	8	3.8	223	3	5.9
RTF1+UGP2	9	4.8	222	4.1	7.3
ERP44+PSMD1	9	3.4	222	2.8	5.2
ERP44+PSMB6	9	4.7	222	3.8	6.8
SEC22B+VPS35	8	5.5	222	4.3	8.2
ANAPC2+SEC22B	8	5.8	222	4.8	8.8
CAMLG+PSMC1	9	5	222	4.1	7.2
TRAPPC8+VCP	8	5.4	222	4.7	8.4
CAMLG+RRS1	9	5.2	222	4.5	7.7
ASNA1+CCT4	8	5.8	222	4.6	8.6
DCTN1+VPS53	9	4.9	222	4	7.3
CAMLG+SF3A1	9	5	222	3.9	7.3
ASNA1+RTF1	8	5.5	222	4.5	8.3
ASNA1+WDR3	8	5.7	222	4.7	8.5
SEC22B+TRAPPC11	8	5.6	222	4.9	8.6
CHAF1A+VPS53	8	5.6	222	4.5	8.4
DCAF13+TRAPPC5	8	5.8	222	4.6	8.6
UGP2+VPS54	9	5.1	222	4.3	7.5
SEC24A+SF3B2	9	3.8	221	3	5.7
SEC22B+VPS54	8	6.2	221	5.3	9.4
KDM1A+UGP2	9	3.6	221	3	5.4
ANAPC2+TRAPPC8	8	5.9	221	4.8	9
MYBL2+UGP2	9	5	221	3.8	7.3
SEC22B+SNRPD3	9	4.9	221	4.2	7.4
ASNA1+SEC22B	8	6.1	221	5.2	9.2
CHAF1A+TRAPPC3	8	5.8	221	4.7	8.8
SEC23IP+SNRPD3	9	3.5	221	2.8	5.2
SARS+TRAPPC11	9	3.9	221	3.2	5.8
GMDS+WDR11	8	6.1	221	5	9.2
PSMD2+TRAPPC11	8	4.2	221	3.1	6.4
SPPL3+TMED2	9	2.8	220	2.2	4.3
MYBL2+SEC23IP	9	4.6	220	3.5	6.7
EIF3A+UGP2	9	4.7	220	3.6	6.9
SPATA5L1+VPS53	9	3.7	220	3.2	5.5
PSMA7+SEC23IP	9	3.5	219	2.8	5.2
EIF3A+ERP44	9	3.3	219	2.6	4.9
ATP5A1+SPPL3	9	2.7	219	2.3	4.1
EIF3A+VPS53	9	3.9	219	3.4	5.9
CAMLG+SAMM50	9	6	219	5	8.7
CHAF1A+SPCS3	8	6.7	219	5.5	10
SPPL3+WDR43	9	3.9	219	2.8	5.6
ERP44+RPL4	9	4.2	218	3.5	6.1
DCTN1+UGP2	9	4.7	218	4	6.9
RAD21+SEC24C	9	2.9	217	2.3	4.4
MRPL51+SEC24A	9	2.3	217	1.8	3.7
ATP5B+TRAPPC5	8	3.8	217	3	5.9
ASNA1+RAD21	9	3.8	217	3.1	5.7
SRPRB+TRAPPC5	9	4.1	217	3.3	6.1
TMED2+TRAPPC5	9	3.3	217	2.5	4.9
SF3A1+UGP2	9	5.2	217	4.1	7.4
PSMB6+SEC22B	9	4.3	216	3.5	6.4
RPL35+UGP2	9	3.2	216	2.8	4.9
RPL35+SPCS3	9	3.4	216	2.8	5.2
RPL4+SEC23IP	9	3.4	216	2.7	5
EIF3D+VPS53	8	3.5	216	2.7	5.3
GET4+TRAPPC5	9	3.2	216	2.6	4.9
ASNA1+COG4	8	4.2	216	3.4	6.4
CAMLG+PSMD1	9	5.2	215	4.5	7.7
PSMD2+SEC23IP	9	2.8	215	2.3	4.3
SEC24A+SPCS3	9	4.3	215	3.7	6.4
AKAP9+ERP44	9	2.1	215	1.7	3.2
VPS52+WRB	9	3.6	215	2.8	5.3
NAA25+SEC23IP	9	3	215	2.5	4.6
SF3B2+TRAPPC5	9	3.9	215	3.1	5.7
PSMD1+SPPL3	9	4	215	3.3	6
TRAPPC8+WDR11	8	3.1	215	2.6	4.9
PSMC6+UGP2	9	3.8	215	2.6	5.5
CAMLG+WDR3	9	4.5	215	3.9	6.7
COPA+ERP44	9	3.3	215	2.7	5
SRP54+VPS52	9	3	214	2.3	4.6
PSMD11+VPS53	8	4.6	214	4	7.1
PTPN1+SUCO	9	3	214	2.4	4.6
EIF3L+TRAPPC11	9	3.7	214	3.1	5.5
ATP5A1+UGP2	9	3.5	214	2.9	5.2
AP2A1+CAMLG	8	4.6	214	3.9	7
TMED10+TRAPPC5	9	3.3	213	2.5	4.9
CCNA2+SEC23B	9	3.8	213	3.3	5.8
EIF3H+SPPL3	9	3.6	213	3	5.4
STX5+VPS54	9	3.7	213	3	5.5
PSMD3+SUCO	9	3.4	213	2.8	5.1
RTF1+SEC24A	8	3.9	213	3.2	6.1
RPL7L1+TRAPPC5	9	2.8	212	2.2	4.4
ERP44+WDR3	9	3.7	212	2.8	5.4
HNRNPK+VPS54	9	3.7	212	2.9	5.4
NAA25+VPS53	8	4.3	212	3.5	6.5
HNRNPK+VPS53	9	3.4	212	2.9	5.2
ERP44+WDR43	9	3.8	212	3.2	5.8
SCFD1+SEC24B	8	5.8	212	4.7	8.9
PSMC1+TRAPPC11	9	3.9	211	2.7	5.8
ATP5A1+TRAPPC11	9	4.9	211	3.7	7.1
PSMD11+TTK	8	3.3	211	2.6	5.3
TUBB+VPS54	9	5	211	3.8	7.2
PSMD3+SPCS3	8	3.4	211	2.7	5.3
PSMC6+VPS53	9	4	211	3.1	5.8
SEC24B+UBR4	9	3.1	211	2.6	4.8
CCT4+VPS53	8	4.3	210	3.6	6.7
RAD21+SEC22B	9	3.2	210	2.6	4.8
SUCO+UBA3	8	4.9	210	3.9	7.5
PSMD2+TRAPPC5	9	3	210	2.4	4.5
RPL35+TRAPPC5	9	2.7	210	2.3	4.1
GET4+SPCS3	9	3.5	210	3	5.3
PRPF39+SPPL3	9	3.9	210	2.9	5.7
SPATA5L1+UGP2	9	4.1	210	2.9	6
MRPL54+TRAPPC5	9	4.8	210	4	7.2
ERP44+THOC5	8	3.2	210	2.7	4.9
SAMM50+SPPL3	9	4.2	210	3.7	6.3
VPS53+VPS54	9	4.2	210	3.5	6.2
RAB14+TRAPPC5	9	3.3	209	2.6	5
EIF3L+TRAPPC5	9	2.6	209	2.2	4
PTPN1+TRAPPC3	9	4.1	209	3.4	6.1
CAMLG+PSMD11	9	4.7	209	3.9	6.9
RRS1+SEC24A	9	3.1	209	2.5	4.7
RPL4+TRAPPC5	9	3	209	2.3	4.5
RPS6+SUCO	9	5	209	4.1	7.3
PSMD11+SPPL3	9	3.4	209	2.7	5.1
AKAP9+CAMLG	9	4.5	209	3.9	6.7
ERP44+SF3A1	9	3	209	2.4	4.5
SEC24B+STX5	9	3.3	209	2.6	5
RPL35+SPPL3	9	3.4	209	2.8	5.2
ASNA1+SGTA	9	3.9	209	2.9	5.7
COPA+VPS53	8	3.6	208	3	5.6
ANAPC2+TRAPPC5	9	2.5	208	2	3.8
EIF3L+SEC23IP	9	2.4	208	1.9	3.7
SARS+VPS54	8	3.8	208	3.2	5.8
TRAPPC5+TUBB	9	2.9	208	2.2	4.4
COPS4+TRAPPC5	9	3.5	208	2.8	5.3
SEC23IP+WDR43	9	3.7	208	2.9	5.4
CHAF1A+UGP2	9	4.6	207	3.4	6.6
CCT3+TRAPPC8	8	3.9	207	3.2	6.1
SCFD1+TMED10	9	4.3	207	3.4	6.5
CHAF1A+SEC24A	9	3.4	207	2.6	5
AP1M1+ASNA1	9	3.9	207	2.8	5.7
GOLIM4+VPS53	9	3.4	207	2.7	5.1
CAMLG+KDM1A	9	4.1	207	3.4	6
PPP1R8+VPS53	8	4.5	207	3.7	6.8
MGAT5+SEC22B	9	3.8	206	3.1	5.7
CCNA2+ERP44	9	2.9	206	2.1	4.4
UGP2+WDR43	9	4	206	3.2	6
EIF3A+SUCO	8	4.1	206	3	6.2
RAB14+SPCS3	9	3.9	206	3.3	5.9
UGP2+WDR3	9	4.4	206	3.6	6.4
DCAF13+SEC24A	9	3.6	206	3	5.4
DCTN1+VPS52	9	3.9	206	3.1	5.9
RTF1+VPS53	8	4	206	3.3	6.1
ASNA1+MYBL2	8	5.5	206	4.7	8.4
AP2A1+SEC22B	8	5.2	205	4.2	7.8
STX5+TRAPPC5	9	3.4	205	2.8	5.2
COPS4+SEC24A	9	3.2	205	2.4	4.8
DCAF13+SEC24B	9	3.2	205	2.5	4.8
RTF1+TRAPPC3	8	4.3	205	3.7	6.6
CHAF1A+ERP44	8	3.9	205	3.4	6.1
IFFO1+TRAPPC11	9	4	204	3.2	6
SGTA+SPCS3	9	3.7	204	3.1	5.5
AP1M1+MGAT5	9	-3.4	204	-5.1	-2.8
RRS1+SEC22B	8	5.2	204	4.5	7.9
ERP44+SON	8	3.4	204	2.6	5.3
CCT3+SPPL3	9	4	204	3.4	6
COX7C+SEC24A	9	2.8	204	2.2	4.3
STX5+VPS52	9	3.6	204	2.8	5.4
CAMLG+MYBL2	9	4.9	204	4.1	7.2
ASNA1+TMED2	9	4	204	3.4	6
RPL7L1+SEC23IP	9	3.2	204	2.5	5
MRPL51+UGP2	9	4.4	204	3.6	6.6
ARL1+ASNA1	9	4.5	204	3.6	6.6
PSMA7+TRAPPC11	9	4.6	203	3.5	6.6
PSMD1+TRAPPC11	9	3.6	203	2.8	5.3
PSMB6+SUCO	8	4.4	203	3.6	6.8
SPATA5L1+SPPL3	9	3	203	2.4	4.6
NAA25+SUCO	9	2.9	203	2.4	4.5
GOLIM4+SUCO	9	2.1	203	1.7	3.3
CAMLG+TMED10	9	3.9	203	3.5	5.9
SEC24B+VPS35	9	3.4	203	2.4	4.9
CAMLG+RAB14	9	4.5	203	3.9	6.7
ASNA1+CHAF1A	8	4.7	203	3.8	7
SEC23IP+VCP	8	4.1	203	3.4	6.4
RAB14+VPS52	9	3.4	203	2.7	5.2
PSMC6+SPPL3	9	4.3	202	3.3	6.3
RPL7L1+UGP2	9	4.2	202	3.3	6.2
STX5+UBR4	9	3.7	202	3	5.5
AP2A1+SRPRB	8	5	202	3.8	7.5
EIF3L+UGP2	9	3.6	202	3	5.3
ANAPC2+VPS53	8	4	202	3.5	6.3
SNRPD3+TRAPPC11	8	4.1	202	3.5	6.4
MRPL54+VPS54	8	4.1	202	3.4	6.3
RPL7L1+SPPL3	9	3.4	202	2.7	5.2
SCFD1+SRP54	9	4.2	202	3.5	6.2
ERP44+SNRPD3	9	3.7	202	3.1	5.5
PRPF39+VPS54	8	4.3	202	3.2	6.6
TUBB+UGP2	9	3.2	202	2.6	4.8
CAMLG+STX5	9	3.8	202	3.1	5.7
COX7C+UGP2	9	3.7	201	2.9	5.6
ATP5B+UGP2	9	4.4	201	3.7	6.5
SARS+SEC24A	9	2.9	201	2.2	4.4
CCT3+ERP44	9	4.2	201	3.1	6
SPPL3+THOC5	9	4.8	201	3.5	6.9
COG4+VPS53	9	3.6	201	2.6	5.3
AP1M1+SEC22B	9	2.8	201	2	4.2
EIF6+SEC22B	8	4.3	201	3.6	6.8
CAMLG+RPL4	9	4.9	201	4	7.2
RRS1+TRAPPC11	8	3.9	200	3.1	6.1
NAA25+TRAPPC11	8	3.2	200	2.5	5
MRPL51+TRAPPC5	8	2.9	200	2.2	4.6
PSMD2+UGP2	9	2.8	200	2.2	4.4
SEC24A+SPATA5L1	9	3.2	200	2.6	5
MRPL51+VPS53	8	5.6	200	4.4	8.4
EIF3D+ERP44	9	3.8	200	2.9	5.6
SAMM50+SEC22B	8	5.2	200	4.5	7.9
PPP1R8+UBR4	9	2.7	200	2.4	4.2
CAMLG+SNRPD3	9	4.6	200	3.8	6.9
TRAPPC5+VPS52	8	3.8	200	3.2	6
CAMLG+VPS52	8	4.9	200	4.2	7.5
PRPF39+SCFD1	7	3.2	200	2.5	5.1
CAMLG+WDR43	8	4.7	199	4	7.3
SCFD1+TRAPPC5	8	4	199	3.2	6.1
SPCS3+WRB	8	3.5	199	2.8	5.4
STX5+TTK	9	4.1	199	2.9	6
RRM1+SPPL3	8	3.9	199	3	6
CAMLG+SRP54	9	4.1	199	3.5	6.2
SCFD1+SEC22B	8	6.3	199	5.1	9.3
VPS53+WDR43	8	4.9	199	4.1	7.5
AKAP9+VPS53	9	3.9	198	3	5.8
EIF3L+SPCS3	8	4	198	3.2	6.2
COG3+TRAPPC3	9	4.2	198	3.4	6.1
SF3B2+TRAPPC11	7	3.9	198	3.1	6.4
ATP5B+SEC22B	7	3.8	198	3.3	6
TRAPPC5+UTP20	7	3.8	198	2.8	6.1
EIF3A+SEC23IP	9	3.9	198	2.9	5.7
TRAPPC11+UTP20	7	3.9	198	3.2	6.3
PSMD2+SEC22B	7	4	198	3.3	6.5
ASNA1+EIF3D	8	4.9	198	4	7.5
DCAF13+SCFD1	7	3.9	198	3.2	6.4
HNRNPK+SEC22B	7	3.9	198	3.4	6.5
SPCS3+UBA3	7	4	198	3.3	6.5
SCFD1+VPS35	7	3.9	198	2.9	6.3
SCFD1+VPS53	8	5.3	198	4.4	8
SAMM50+TRAPPC5	7	3.8	198	2.7	6.1
KDM1A+SPCS3	9	4	198	3.3	6
SEC24A+TTK	9	2.7	197	2.1	4.1
ERP44+IFFO1	9	3.7	197	2.7	5.5
KDM1A+TRAPPC5	9	3.2	197	2.5	4.9
AP2A1+SPCS3	9	4.7	197	3.5	6.9
SMC3+TRAPPC11	9	3.2	197	2.5	4.8
PSMA7+SEC22B	7	4.5	197	3.9	7.3
SEC22B+UBR4	7	4.4	197	3.9	7.3
CAMLG+TTK	9	5.5	197	4.6	8.2
RPL4+SEC22B	7	4.4	197	3.9	7.2
COPB1+UGP2	7	3.9	197	3.4	6.5
SEC22B+SF3B2	7	4.4	197	3.7	7.2
AP2A1+SEC24A	9	2.6	197	2.1	4
NAA25+SEC22B	7	4.5	196	3.9	7.4
TRAPPC3+UTP20	8	5.7	196	4.9	8.6
RPS6+SEC22B	7	4.8	196	4.1	7.8
SAMM50+UGP2	9	4.8	196	4	7.2
SARS+TRAPPC5	9	4.9	196	3.7	7.1
DCTN1+TRAPPC5	9	4	196	3.2	6
SEC22B+WDR3	7	4.9	196	4.1	7.9
SEC22B+UBA3	7	4.7	196	3.6	7.4
SEC22B+VCP	7	4.2	196	3.6	6.7
SCFD1+TRAPPC11	7	4.5	196	3.6	7.3
RRM1+SEC22B	7	4.5	196	3.9	7.3
ATP5A1+VPS54	9	3.2	196	2.3	4.8
MYBL2+SEC22B	7	4.7	196	4	7.6
PSMA7+VPS53	7	4.7	196	3.5	7.3
RTF1+SEC22B	7	4.8	196	3.9	7.8
ASNA1+COPA	7	5.3	195	4.2	8.5
PSMA7+SPCS3	7	4	195	3.2	6.5
ASNA1+CCT3	7	5	195	4	8
DCAF13+SEC22B	7	5.1	195	4.4	8.2
PRPF39+UGP2	9	3	195	2.4	4.6
CAMLG+HNRNPK	9	4.3	195	3.8	6.5
COG4+SEC22B	7	5.1	195	3.9	8
CAMLG+EIF3D	8	4.5	195	3.7	6.9
SEC23IP+UBA3	9	3.5	194	3	5.3
TRAPPC11+UBR4	8	4.6	194	3.8	7.1
PSMD1+SPCS3	9	3.9	194	3.1	5.8
SPCS3+TUBB	9	4.3	194	3.4	6.3
SMC3+TRAPPC8	9	4.4	194	3.4	6.4
ERP44+PSMC6	9	2.9	194	2.2	4.4
CAMLG+SMC3	9	4.6	194	3.4	6.7
EIF6+SUCO	9	2.9	194	2.2	4.5
PSMD11+SEC22B	7	5.4	194	4.2	8.5
SAMM50+TRAPPC11	7	5.4	194	4.2	8.6
EIF3D+SEC22B	8	5.2	193	4.3	7.9
ASNA1+SCFD1	7	6	193	4.9	9.5
GOLIM4+TRAPPC11	9	3.1	193	2.7	4.8
SF3B2+VPS53	7	6.1	193	5	9.7
ASNA1+PSMB6	7	6.2	193	5.3	9.8
CHAF1A+TRAPPC11	7	3.9	193	3.2	6.4
RTF1+SEC24B	9	3.2	193	2.3	4.7
COG3+TRAPPC8	9	4.4	192	3.5	6.4
CAMLG+COPA	8	6.1	192	4.9	9.2
SEC22B+SMC3	9	4.5	192	3.5	6.7
ATP5B+CAMLG	9	4.9	192	3.8	7.2
SAMM50+TMED10	9	2.5	192	2	4
CAMLG+COG3	9	4.9	192	3.9	7.4
ANAPC2+SEC24A	9	2.3	191	1.8	3.7
TTK+UGP2	9	4.4	191	3.5	6.5
SF3B2+TRAPPC3	9	4.5	191	3.4	6.5
EIF3A+SPCS3	9	4.1	191	3.2	6
MYBL2+SPPL3	8	4.1	191	3.2	6.4
GOLIM4+UGP2	9	3.2	190	2.7	5
EIF3A+SPPL3	9	4.7	190	3.5	6.8
RPS6+TRAPPC5	8	3.5	190	2.8	5.6
MRPL54+PSMA7	9	2.7	190	2.2	4.2
CAMLG+NAA25	9	5.2	190	4.1	7.7
PSMC1+TRAPPC5	9	2.9	190	2.2	4.6
PSMD2+VPS53	9	4	190	3.1	5.9
PRPF39+SPCS3	7	3.2	190	2.7	5.2
PSMD1+UGP2	9	4.7	190	3.6	6.8
ANAPC2+TRAPPC11	8	5.7	190	4.5	8.6
TRAPPC5+VPS54	8	4.5	190	3.8	7
COPS4+SEC24B	9	2	189	1.7	3.2
CAMLG+TMED2	9	3.9	189	3.4	6
CAMLG+VCP	9	4.4	189	3.7	6.8
RRS1+SPPL3	8	4	189	3.1	6.1
BAG6+SCFD1	9	4.5	189	3.5	6.8
BAG6+SRPRB	9	2.8	188	2	4.3
PSMC1+UGP2	9	3.1	188	2.6	4.8
CCT3+SEC23IP	9	3.5	188	2.5	5.1
RPL35A+UGP2	9	4.6	188	3.9	6.9
RRS1+VPS53	8	4.9	188	3.9	7.5
TRAPPC11+VPS35	8	5.6	188	4.5	8.5
GOLIM4+SPCS3	9	3.6	187	2.8	5.3
ARL1+SUCO	9	3.5	187	2.5	5.1
GOLIM4+MGAT5	9	-3.5	187	-5.2	-2.9
TTK+VPS53	7	3.7	187	3.1	6
HNRNPK+UGP2	9	3.5	186	2.5	5.2
RPS6+UGP2	9	5.2	186	4.3	7.7
AP1M1+ST3GAL4	9	-3.5	186	-5.4	-2.9
DCAF13+VPS52	7	2.9	186	2.4	4.9
SCFD1+TMED2	9	3.4	186	2.6	5.1
SON+VPS53	7	5.1	185	4	8.1
RPL4+SEC24A	9	4.6	185	3.3	6.6
COPB1+SEC23B	7	4	184	3.4	6.5
SPCS3+TTK	7	4.4	184	3.6	7.1
THOC5+TRAPPC11	9	3.8	184	3.1	5.7
CAMLG+WDR11	8	3.9	184	3.1	6
SEC22B+WDR11	8	4.3	184	3.8	6.6
IFFO1+SPCS3	9	2.9	184	2.4	4.5
UBA3+VPS52	8	2.5	184	1.9	4
PSMC6+TRAPPC5	9	3	183	2.3	4.5
ARL1+VPS53	8	4.7	183	3.9	7.2
DCAF13+SPCS3	7	3.5	183	2.9	5.8
VPS52+VPS54	7	4.5	183	3.5	7.2
ARL1+TRAPPC8	8	4.4	183	3.6	6.8
SEC24A+UBR4	9	4.1	183	3.3	6.1
RPS6+VPS53	7	4.4	183	3.5	7
SUCO+WDR11	9	4.9	182	3.7	7.1
SF3A1+VPS54	7	3.8	182	2.6	6.1
COG4+SUCO	9	3.2	182	2.5	5
PSMC1+SPCS3	9	4.4	182	3.3	6.4
SPCS3+TMED10	9	2.6	182	2	4
MRPL51+VPS54	8	4.1	182	2.9	6.3
AKAP9+UGP2	9	2.8	182	2.3	4.4
SON+UGP2	8	3.3	182	2.8	5.2
PSMA7+VPS52	8	3.3	182	2.2	5.1
TRAPPC5+UBA3	7	3.2	181	2.7	5.1
EIF3A+TRAPPC11	8	3.1	181	2.5	4.9
MRPL54+SEC24A	9	5	181	4	7.3
RTF1+TRAPPC5	7	2.9	181	2.5	4.9
PSMD3+SPPL3	9	3.2	181	2.4	4.9
CCT4+PRPF39	9	2.2	181	1.7	3.6
EIF6+VPS53	8	3.1	180	2.3	4.9
RAB14+UBR4	9	3	180	2.5	4.8
MRPL51+RPL4	9	3.4	180	2.4	5
RAB14+SCFD1	9	4.1	180	3	6.1
BAG6+UBR4	8	3.6	180	2.5	5.6
COG4+UGP2	9	3.1	179	2.2	4.6
ATP5B+SEC24A	9	3.7	179	2.5	5.5
RPL4+VPS53	7	3.5	179	2.9	5.7
SNRPD3+SPCS3	7	4.4	179	3.3	7.1
PPP1R8+SRPRB	9	3.1	179	2.1	4.5
SAMM50+SPCS3	7	4	179	3.1	6.5
CCT4+TRAPPC5	8	3.8	179	3	5.8
AKAP9+SPPL3	9	2.3	178	1.8	3.6
COG3+VPS53	8	4.2	178	3.1	6.3
SARS+SCFD1	7	3.5	178	2.9	5.7
RPL35+SEC24A	9	2	178	1.6	3.2
PTPN1+UGP2	9	2.8	178	2.3	4.5
MRPL51+SCFD1	7	4.5	178	3.5	7.2
AP1M1+GET4	9	-2.9	178	-4.5	-2.4
SRPRB+VPS52	7	3.8	177	2.9	5.9
AP2A1+SCFD1	7	5	177	3.9	7.9
EIF3D+TRAPPC11	7	3.5	177	2.9	5.8
BAG6+VPS52	8	3.2	177	2.4	4.9
BAG6+VPS54	8	3.5	177	2.6	5.4
ARL1+TRAPPC11	9	3.7	177	2.9	5.6
MRPL54+UBR4	9	3	177	2.2	4.5
BAG6+TRAPPC5	8	3.4	177	2.7	5.3
COX7C+SPCS3	7	3.5	177	2.9	5.7
PSMA7+SCFD1	7	3.4	177	2.8	5.7
TRAPPC5+VCP	7	4.9	177	3.9	7.9
CAMLG+COG4	9	4.6	177	4	7
SRPRB+VPS54	7	4.2	176	3.2	6.7
GOLIM4+SPPL3	9	2.5	176	1.9	3.9
ARL1+TRAPPC3	8	5.6	176	4.9	8.7
ERP44+NAA25	9	4.4	176	3.2	6.6
PRPF39+TRAPPC5	8	3.1	176	2.3	4.8
CHAF1A+SPPL3	8	4.2	176	3.4	6.5
THOC5+TRAPPC5	9	4.8	176	3.5	6.9
PSMB6+SEC23IP	9	3.6	176	3	5.4
PSMD2+SPCS3	8	3.5	176	2.6	5.4
SCFD1+THOC5	8	3.4	176	2.5	5.4
UBR4+VCP	8	2.6	176	2.2	4.2
SPCS3+WDR3	7	4	175	3.5	6.6
SEC22B+SF3A1	7	5.8	175	5	9.1
RPS6+SEC24A	8	3	175	2.3	4.7
RAD21+TRAPPC3	9	3.4	175	2.6	5.1
PSMC6+SEC24A	9	3	175	2.2	4.6
THOC5+UGP2	9	4.4	175	3.2	6.5
CAMLG+ST3GAL4	9	4	174	3.4	6
CAMLG+PSMC6	9	4.1	174	3.4	6.1
CCT4+TRAPPC11	7	3.8	174	3.1	6.3
EIF3L+ST3GAL4	9	-3.3	174	-5.1	-2.6
SRP54+VPS54	9	4.7	173	3.4	6.7
RPL35A+SPCS3	7	3.3	173	2.4	5.4
SNRPD3+TRAPPC5	8	3.8	173	3.1	5.8
SARS+SPCS3	7	3.6	173	3	5.9
SRP54+UBR4	9	2.8	173	2.2	4.4
ARL1+CAMLG	9	3.1	173	2.4	4.7
EIF3D+NAA25	7	3.1	173	2.3	5
GOLIM4+SEC23IP	9	1.9	173	1.5	3
CCT4+PSMA7	6	2.5	173	2.2	4.5
TRAPPC11+WDR3	7	4.5	173	3.7	7.2
CAMLG+RPS6	8	4.6	172	4.1	7.3
COPS4+TTK	7	2.4	172	1.8	4.1
CAMLG+MGAT5	9	4.2	172	3.2	6.3
COG3+SEC22B	6	3.3	171	2.4	5.7
MRPL54+SCFD1	7	5.3	171	4.5	8.3
SEC23IP+SEC23IP	6	3.5	171	2.9	6
EIF3D+SEC24A	9	3.8	171	2.9	5.7
AKAP9+ST3GAL4	9	-3.2	171	-4.8	-2.6
UBR4+VPS52	8	3.2	171	2.5	5
PSMB6+UGP2	9	4.2	171	3.4	6.3
COPS4+SRPRB	9	2.9	171	2.1	4.5
EIF3A+SAMM50	7	2.6	171	2.1	4.3
COPS4+SCFD1	8	3.8	171	3	6
MGAT5+SEC23B	9	2.8	171	2	4.2
AKAP9+SPCS3	9	3	171	2.3	4.7
CCT3+UGP2	7	4.1	171	3.4	6.6
PSMA7+UGP2	9	4	171	3.3	6.2
RPL35A+TRAPPC11	7	3.4	170	2.7	5.6
ERP44+ERP44	6	3.5	170	3	6
EIF6+UGP2	9	4.1	170	2.9	6
MRPL54+SF3B2	9	3.2	170	2.2	4.8
PPP1R8+SCFD1	6	3.5	170	3	6.1
TRAPPC11+VCP	6	3.8	170	3	6.5
BAG6+CCT3	9	3.1	170	2.4	4.7
COPB1+SEC23IP	6	3.6	170	3	6.1
ATP5A1+SPCS3	9	3.8	170	3	5.8
SPCS3+UTP20	7	4.5	170	3.8	7.4
CCNA2+TRAPPC11	9	2.9	170	2	4.3
ST3GAL4+UGP2	9	2.5	170	2	4.1
RRM1+VPS53	7	4.4	170	3.6	7.1
PSMD11+SPCS3	7	4	170	3.2	6.5
SEC23IP+SON	8	3.2	169	2.4	4.9
SPPL3+SPPL3	6	4	169	3.3	6.8
SUCO+SUCO	6	4.2	169	3.7	7
CCNA2+VPS54	9	4.9	169	3.8	7.1
ATP5B+SPCS3	6	4.3	169	3.5	7.4
MRPL51+SPCS3	8	4.2	169	3.1	6.2
CHAF1A+TRAPPC5	7	3.3	169	2.7	5.6
BAG6+STX5	9	3.6	169	2.7	5.3
SCFD1+TUBB	8	3.8	169	2.8	6.1
RTF1+VPS52	6	3.3	169	2.5	5.7
SGTA+VPS54	9	2.3	169	1.8	3.6
KDM1A+VPS54	7	3.4	169	2.7	5.6
VPS53+WDR11	7	3.7	169	2.8	5.8
PPP1R8+VPS54	7	4.5	169	3.3	7.1
RPL35A+SEC22B	7	5	169	4.1	7.9
SEC24A+WDR3	9	3.4	169	2.4	5.1
RRM1+SPCS3	6	4	169	3	6.7
SEC22B+SEC22B	6	4.7	168	4.2	7.9
CCT4+PSMD3	7	2.4	168	1.9	4.1
EIF3H+VPS54	6	4.5	168	3.6	7.6
COPB1+SPPL3	6	4.4	168	3.3	7.4
SEC23B+SEC23B	6	4.6	168	4.2	7.8
PSMB6+VPS53	6	4.3	168	3.4	7.4
RRS1+SPCS3	6	4.4	168	3.2	7.4
SEC24C+SEC24C	6	4.6	168	4.2	7.8
CAMLG+CCT3	7	5.2	168	4	8.1
MRPL54+VPS52	9	2.3	168	1.8	3.6
RAD21+SEC23B	9	2.4	168	1.9	3.7
DCTN1+SCFD1	7	4.7	168	3.9	7.5
VPS35+VPS52	9	4.6	168	3.7	7
SPATA5L1+VPS54	7	3.6	168	2.9	5.9
VPS53+VPS53	6	4.7	168	3.9	7.8
MYBL2+TRAPPC5	7	3.5	167	2.4	5.6
ASNA1+ASNA1	6	4.9	167	4.4	8.4
SON+SPCS3	8	4.2	167	3.3	6.3
DCTN1+SPCS3	7	4.2	167	3.5	6.8
COPB1+SEC24C	6	5.3	167	4.5	8.6
TRAPPC3+TRAPPC3	6	5.3	167	4.5	8.7
MGAT5+TRAPPC3	9	3	167	2.4	4.9
VPS54+WRB	8	5.6	167	4.5	8.5
SCFD1+VPS52	7	4	167	3.2	6.6
RRS1+TRAPPC5	7	2.3	167	1.9	3.6
AP1M1+GOLIM4	9	-2.9	166	-4.5	-2.4
SCFD1+STX5	9	3.5	166	2.7	5.4
GET4+STX5	9	2.5	166	1.9	3.8
CAMLG+CAMLG	6	5.4	166	4.6	9.1
SMC3+UGP2	9	3.8	166	2.9	5.6
SPCS3+WDR43	8	3	166	2.4	4.8
PSMD1+TRAPPC5	9	2.8	166	1.9	4.3
COPB1+TRAPPC3	6	5.5	166	4.6	9.3
ATP5B+VPS53	6	5.4	166	4.4	9.1
ATP5B+SPPL3	9	4.2	166	3.2	6.2
SMC3+SPPL3	9	3.2	166	2.3	4.8
GET4+SEC24B	9	2.2	166	1.7	3.5
PSMD11+SEC24A	9	3.6	166	3.1	5.8
CAMLG+PSMB6	8	5.2	166	4.4	8.1
UGP2+UGP2	6	6.2	165	5.5	10.3
DCAF13+SRPRB	7	2.4	165	2	4.2
MRPL51+STX5	9	2.5	165	1.9	3.9
CAMLG+RRM1	7	3.6	165	3.1	5.9
SEC22B+UTP20	6	6	165	5	10.1
EIF6+RRM1	7	2.1	165	1.8	3.6
IFFO1+SEC23IP	9	3.3	165	2.4	5
MYBL2+SEC24A	7	3.2	165	2.5	5.1
AP2A1+SEC24B	9	3.3	165	2.1	4.8
EIF6+RRS1	7	2.7	164	2.1	4.3
AKAP9+SEC23IP	9	2	164	1.6	3.2
PSMD2+SEC24A	9	2	164	1.6	3.4
RAB14+TMED2	9	2.6	164	1.9	3.9
GMDS+GMDS	6	6.5	164	5.8	10.9
SF3B2+SRPRB	7	2.8	164	2.1	4.4
COX7C+SEC24B	9	2.3	164	1.8	3.7
RPL35A+SEC24A	9	3.7	164	2.6	5.5
TRAPPC8+TRAPPC8	6	6.5	164	5.4	10.9
AP1M1+CAMLG	9	3.3	163	2.7	5.1
PSMD11+VPS54	7	4	163	3.2	6.4
AP2A1+UBR4	8	2.6	163	2	4.1
CCT4+SPCS3	7	2.7	163	2.1	4.3
RRM1+SRP54	9	2.7	163	2	4.3
AKAP9+TRAPPC11	9	3.2	163	2.5	4.9
HNRNPK+SPCS3	8	2.9	163	2.2	4.6
TRAPPC11+UBA3	7	5.2	163	4.1	8.2
SRPRB+UBR4	7	2.4	162	1.9	4.1
TRAPPC11+WDR43	7	5.2	162	4.1	8.3
EIF3L+MGAT5	9	-3.1	162	-4.8	-2.6
DCAF13+TRAPPC11	8	3.9	162	3.1	6.1
PTPN1+TRAPPC11	9	3.3	162	2.5	5.2
RAD21+RPS6	9	2.6	161	2	4
PSMA7+SEC24A	9	2.8	161	1.9	4.2
EIF3H+SEC24A	8	2.6	161	2	4.1
SEC24A+SON	9	5	161	3.8	7.2
TMED2+UBR4	9	2.5	161	2	4
SEC23IP+TMED2	9	2.3	161	1.8	3.6
MGAT5+ST3GAL4	9	-4	161	-6.1	-3.3
PTPN1+RTF1	9	2.4	160	1.8	3.9
EIF3A+SEC24A	9	3.7	160	2.7	5.4
PSMD2+SPPL3	9	3.5	160	2.5	5.2
RPL35A+VPS54	6	4	160	3.3	6.9
EIF3D+UGP2	9	4.1	160	3.4	6.1
PSMD3+TRAPPC11	7	2.4	160	2	4.2
SMC3+VPS53	9	2.9	160	2.2	4.5
RAD21+ST3GAL4	9	-3.3	159	-4.9	-2.6
MRPL54+VCP	8	2.3	159	1.8	3.8
IFFO1+VPS54	9	3.4	159	2.7	5.4
RAB14+VPS54	9	3	159	2.2	4.5
PSMA7+TRAPPC5	8	4.9	159	3.7	7.6
SMC3+VPS54	8	2.9	159	2.3	4.7
RPL35A+SRPRB	7	2.6	158	1.9	4.2
CCT4+EIF3D	6	2.6	158	1.9	4.3
RAB14+STX5	9	2.8	158	2.2	4.4
IFFO1+UGP2	9	2.5	158	2	4
MRPL54+RPL7L1	9	2.6	158	2	4
PSMD2+VPS35	8	3.2	158	2.3	5
SCFD1+SPATA5L1	6	5	157	4	8.4
ST3GAL4+TRAPPC11	9	3.1	157	2.4	4.7
COPB1+ERP44	7	4.8	157	3.6	7.7
COPS4+VPS52	8	2.5	157	1.8	4
CCT3+SEC24A	9	2.5	156	2	4
AP1M1+IFFO1	9	-3.2	156	-5.2	-2.6
RTF1+STX5	8	3.7	156	2.6	5.6
RPL4+TRAPPC11	7	5.1	156	4.3	8.2
CCT3+TRAPPC5	7	3.1	156	2.4	5
CHAF1A+SRPRB	7	3.1	156	2.4	4.9
CCT3+SUCO	6	5.2	156	4.1	8.6
ERP44+GOLIM4	9	2.1	156	1.6	3.3
MRPL51+VPS52	9	2.6	155	2	4
MYBL2+VPS52	8	3.4	155	2.6	5.3
NAA25+SPCS3	8	4.2	155	3.2	6.4
CCNA2+SPCS3	8	3.1	155	2.2	4.8
RPL35A+SPATA5L1	7	3.3	155	2.6	5.3
EIF3A+TRAPPC5	8	3.8	154	2.9	6
COX7C+SCFD1	7	4.2	154	3.4	6.7
CCT3+SPCS3	6	3.4	154	2.9	6
CCT4+SRPRB	6	2.7	153	2.1	4.5
SAMM50+SPATA5L1	8	2.6	153	1.9	4.1
EIF3H+TRAPPC5	8	3	153	2.1	4.7
CCT3+SEC24B	8	2.9	152	2.2	4.6
CAMLG+UBA3	8	4.5	152	3.8	7.1
TMED10+UBR4	9	3.5	152	2.2	5
MGAT5+WDR11	9	-3.5	152	-5.9	-3.1
SPCS3+TMED2	9	2.5	152	2	4
EIF3D+PRPF39	7	2.5	152	2	4.2
RPL4+VPS52	7	3.5	151	2.6	5.8
GET4+VPS52	9	2.5	151	2	4
MRPL51+PSMB6	6	2.5	151	2	4.3
KDM1A+SRPRB	7	3	151	2.5	5
RRS1+STX5	8	2.4	151	1.8	4
CCT4+SEC24B	9	2.9	151	2.1	4.4
SEC24A+UBA3	8	2.7	151	2.1	4.5
COPS4+PSMB6	7	2.7	151	2	4.3
CCNA2+EIF3H	8	2.5	150	1.8	4
SGTA+UBR4	9	2.2	150	1.7	3.4
UBR4+WRB	9	2.8	150	2	4.3
RPL35+UBR4	9	2.1	150	1.7	3.6
CCT4+PSMC1	8	3.2	150	2.2	5.1
GOLIM4+TRAPPC5	9	2.3	150	1.8	3.9
CCNA2+SCFD1	7	3	149	2.3	5
SPCS3+THOC5	7	3.5	149	2.5	5.6
PRPF39+UBR4	8	3.1	149	2.1	4.8
ERP44+WDR11	9	3.9	149	3.2	6
PSMC1+SCFD1	9	2.8	149	2.3	4.5
VCP+VPS53	7	3.3	149	2.5	5.5
TMED2+VPS52	9	2.4	149	1.7	3.7
RTF1+WRB	9	2.9	149	2.2	4.5
CCT4+RPL35A	6	2.4	149	2	4.3
KDM1A+SCFD1	7	3.4	149	2.7	5.7
AKAP9+SCFD1	9	2.7	148	2	4.3
MYBL2+SPCS3	6	3.3	148	2.8	5.9
COG4+TRAPPC11	8	3.4	148	2.7	5.6
DCTN1+PSMA7	8	2.3	148	1.7	3.8
ANAPC2+VPS54	6	4.7	148	3.6	7.8
SPCS3+VPS35	6	5.4	148	4.3	9.1
EIF6+VPS54	7	2.8	148	2.2	4.8
RTF1+SPCS3	6	3.8	148	3	6.5
ATP5B+TRAPPC11	6	3.8	148	2.7	6.2
CHAF1A+VPS52	6	3.7	148	2.6	6
COPS4+RTF1	8	2.6	148	1.9	4.1
COX7C+SAMM50	7	2.8	148	2.2	4.8
PSMB6+TRAPPC11	6	3.8	148	3	6.1
ATP5B+SEC24B	9	3.5	147	2.4	5.2
TUBB+WDR43	9	2.5	147	2	4.1
COG3+SCFD1	6	2.9	147	2.2	5.1
NAA25+VPS54	8	4.5	147	3.3	7
SAMM50+SEC24B	7	2.4	147	1.8	4.1
TRAPPC5+WDR3	7	4	147	2.8	6.4
CCT3+COX7C	6	2.8	147	2.3	4.6
MYBL2+TRAPPC11	7	3.5	147	2.8	5.8
COG3+PSMD11	8	2.5	147	1.9	4.1
RRM1+TRAPPC5	7	3.8	146	2.9	6.2
RRM1+STX5	9	2.9	146	2.4	4.6
KDM1A+SEC24A	9	3	146	2.4	4.7
RAB14+SRPRB	9	4.2	146	2.9	6.1
PSMA7+RPL35A	6	2.6	146	1.9	4.4
COX7C+VPS52	8	2.7	146	2.3	4.3
SEC24A+TUBB	9	2.6	146	1.9	3.9
RPS6+TRAPPC11	6	4.4	145	3.5	7.5
SF3B2+UBR4	9	4.4	145	3.3	6.5
SCFD1+SRPRB	6	4.7	145	3.9	7.8
COG3+SEC23B	8	4.3	145	3.6	7
RRM1+SEC24A	9	2.9	145	2.1	4.4
CHAF1A+VPS54	6	4.5	145	3.5	7.6
EIF3D+SEC24B	8	2.9	144	2.1	4.7
CCT3+SF3B2	5	2.4	144	2	4.5
KDM1A+RPS6	5	2.4	144	2	4.5
PSMB6+SPCS3	6	4.2	144	3.4	6.9
RPL35A+UBR4	7	4.7	144	3.7	7.5
COPA+UGP2	9	4.7	144	3.5	7
COG3+SUCO	9	3.5	144	2.4	5.2
SEC24B+UBA3	8	2.9	144	2	4.6
DCTN1+UBR4	7	4.2	144	3.1	6.7
CAMLG+SON	8	4.3	144	3.7	6.7
IFFO1+PSMB6	9	2.3	144	1.8	3.7
PPP1R8+SARS	8	2.8	143	2.1	4.5
CHAF1A+MRPL54	6	3.2	143	2.5	5.4
EIF3D+TTK	5	2.5	143	1.9	4.5
PSMA7+SAMM50	7	2.7	143	2.2	4.5
SCFD1+SGTA	9	2.8	143	2.1	4.6
COPA+SAMM50	6	2.3	143	1.8	4.3
AP2A1+UBA3	6	2.6	143	2	4.5
CCT4+VCP	5	2.8	143	2.3	4.7
COX7C+VPS54	8	2.3	142	1.8	3.6
CHAF1A+WRB	9	2.8	142	2	4.4
SEC24A+THOC5	9	2.2	142	1.6	3.6
IFFO1+SPPL3	9	3.2	142	2.3	4.8
MYBL2+SCFD1	6	4.5	142	3.4	7.6
ERP44+SMC3	9	3.2	142	2.1	4.6
SNRPD3+UGP2	9	4.3	142	3.1	6.2
RPL35A+STX5	9	2.5	142	2	4
SF3B2+VPS54	5	3.8	141	2.8	6.4
COG3+TRAPPC11	9	3.5	141	2.8	5.5
CCT3+TRAPPC11	6	3.6	141	2.7	6.1
RTF1+TRAPPC11	6	4.5	141	3.4	7.6
TRAPPC5+TTK	6	3.6	141	2.9	6.2
TUBB+VPS52	9	2.4	141	1.7	3.7
SF3A1+SPCS3	8	3	141	2.3	4.8
PSMC6+RTF1	5	2.9	141	2.3	5.4
GET4+MGAT5	9	-3.2	141	-4.8	-2.5
PSMB6+UBR4	6	4.2	141	3.3	7
SPCS3+VCP	6	3.4	141	2.6	5.9
TMED10+UTP20	7	2.3	141	1.8	3.6
CCT3+SRP54	7	3.5	141	2.7	5.8
HNRNPK+TRAPPC11	9	4	141	2.8	5.9
SPCS3+SPCS3	5	4.3	140	3.8	7.3
MRPL54+RPL35A	8	2.4	140	1.9	4
UGP2+WDR11	9	3.8	140	3	6.1
COPB1+TRAPPC8	5	4.4	140	3.6	7.8
PSMD3+SPATA5L1	8	2	140	1.6	3.3
PSMA7+VPS54	6	3.7	140	3	6.1
ATP5B+STX5	8	2.6	140	2.2	4.3
RPL35+VPS54	9	2.9	140	2	4.4
TRAPPC5+TRAPPC5	5	3.3	140	2.8	5.6
SF3A1+VPS53	7	4.6	139	3.8	7.6
KDM1A+SEC24B	9	2	139	1.5	3.2
COPB1+SUCO	5	5.3	139	4.4	9
PTPN1+SCFD1	9	3.7	139	2.9	5.5
MRPL54+SEC24B	9	1.9	139	1.5	3.1
SRP54+STX5	9	2.6	139	2	4.2
TRAPPC11+TRAPPC11	5	5.1	139	4.4	8.9
SARS+VPS52	7	2.6	139	1.9	4.4
EIF3H+SCFD1	5	4.7	139	3.9	8.1
ATP5A1+UBR4	8	3.2	138	2.2	5
PRPF39+UBA3	8	2.4	138	1.9	4
EIF3H+SEC24B	9	1.9	138	1.5	3.1
HNRNPK+UBA3	9	2.6	138	2.1	4.3
AKAP9+TRAPPC5	9	2	138	1.5	3.2
SON+TRAPPC11	6	4.3	138	3.2	7.5
PSMD3+VPS52	8	2.8	138	2.2	4.6
COX7C+EIF3H	7	2.7	137	2.1	4.4
DCTN1+STX5	9	4.4	137	3.4	7
COPA+TRAPPC11	7	4.2	137	3.2	6.6
MGAT5+TMED2	9	-2.8	137	-4.5	-2.3
SON+VPS52	8	3.4	137	2.4	5.4
CAMLG+COPB1	6	4.8	137	4.1	8.1
EIF6+TRAPPC11	8	3.3	137	2.5	5.2
EIF3H+RPL7L1	6	2.8	137	2.2	4.6
PSMC6+SEC23IP	9	2.3	137	1.8	3.8
COG4+VPS54	9	3.4	137	2.8	5.6
VPS35+WRB	8	3.2	137	2.6	5.3
AP1M1+WDR11	9	-3.2	136	-5.2	-2.6
PSMD3+TRAPPC5	8	3.5	136	2.6	5.4
ATP5B+PRPF39	7	2.5	136	1.7	4.1
COX7C+SRPRB	8	3.3	136	2.5	5.2
HNRNPK+SRPRB	8	2.4	136	1.9	4.1
SEC24C+TMED2	9	2.3	136	1.8	3.7
AP1M1+SEC24C	9	1.8	136	1.5	3
COX7C+MRPL51	9	3.2	136	2.2	5.1
COG3+UBR4	8	2.1	135	1.6	3.4
SCFD1+WRB	9	2.4	135	1.8	3.9
COG3+SPCS3	9	2.7	135	2.1	4.2
NAA25+SPPL3	9	2.6	135	2	4.2
COX7C+SNRPD3	7	2.5	135	1.9	4.3
EIF3H+SPCS3	8	2.8	135	2.1	4.7
SF3B2+SPCS3	7	2.8	135	2.1	4.7
COPA+SPCS3	6	3.1	134	2.4	5.3
PSMD2+VPS54	8	4.1	134	3	6.5
SNRPD3+UBR4	7	3.8	134	3.1	6.2
EIF3H+SRPRB	9	2.9	134	1.9	4.4
EIF6+SEC23IP	9	2.8	134	2	4.3
MRPL54+SRP54	9	2.1	134	1.6	3.3
RRS1+SEC24B	8	2.6	134	2.1	4.2
COPS4+PSMD11	8	2.9	134	2	4.6
BAG6+CHAF1A	6	4.1	133	3.1	6.9
PSMD11+VPS52	8	2.4	133	1.8	4
STX5+WRB	9	2.9	133	2.1	4.7
VPS52+VPS52	5	2.8	133	2.1	5.2
SARS+UBR4	6	2.5	133	1.9	4.3
ATP5B+COPS4	7	2.5	133	1.9	4.2
MYBL2+SRPRB	6	2.8	133	2.3	4.6
COG3+ERP44	9	2.6	132	1.9	4.1
DCAF13+STX5	9	3.3	132	2.5	5.2
RPL4+TUBB	8	2.5	132	1.9	4.1
ATP5B+PSMC1	8	2.5	132	1.8	4
DCTN1+SARS	8	3.2	132	2.4	5.3
PPP1R8+WDR3	8	2.6	132	1.9	4.2
MGAT5+TRAPPC8	9	2.1	132	1.6	3.3
PSMB6+RAB14	9	2.2	132	1.7	3.5
ERP44+PTPN1	9	2.2	132	1.6	3.3
EIF3H+MRPL54	9	2.4	131	1.8	3.8
MRPL54+SAMM50	8	3.1	131	2.1	4.7
PTPN1+ST3GAL4	9	-2.6	131	-4	-2.1
SRPRB+THOC5	9	2.2	131	1.6	3.6
EIF3A+UBA3	7	3	131	2.2	5.1
THOC5+VPS54	7	3.2	131	2.6	5.1
RTF1+TUBB	7	3.1	131	2.1	5
MYBL2+STX5	8	2.6	131	2.1	4.4
DCTN1+PPP1R8	9	2.7	131	2.1	4.4
CCT4+SCFD1	5	3.1	131	2.6	5.5
MGAT5+TMED10	9	-3.1	131	-4.8	-2.5
CCT4+SEC24A	9	2.6	131	2.1	4.1
PPP1R8+PSMD11	7	3.4	130	2.3	5.6
RAD21+SUCO	9	2.2	130	1.7	3.4
PSMA7+SPATA5L1	8	2.6	130	2	4.2
EIF3D+TRAPPC5	7	4.5	130	3.7	7.3
COX7C+MYBL2	8	3.3	130	2.6	5.6
RRM1+SPATA5L1	6	2	130	1.7	3.7
RPL4+SRPRB	6	3.4	130	2.5	5.8
ATP5B+PTPN1	8	2.3	130	1.7	3.8
TRAPPC11+TTK	7	3.6	130	2.8	5.8
AP1M1+SGTA	9	-2.8	130	-4.4	-2.2
RAB14+TMED10	9	2	130	1.5	3.2
EIF6+ERP44	9	4	130	2.7	5.9
DCTN1+RPL7L1	8	4.5	129	3.7	7.6
MGAT5+SGTA	9	-3.2	129	-4.9	-2.6
UBR4+VPS54	6	3.2	129	2.6	5.4
RTF1+UBR4	6	2.7	129	2.2	4.6
PSMC1+VPS35	8	2.5	129	1.9	4.3
RAB14+UTP20	7	3.2	129	2.7	5.4
DCTN1+EIF3A	8	2.7	129	2.2	4.5
COX7C+RTF1	7	3.2	129	2.1	5.1
RTF1+TMED2	9	2.8	128	2.2	4.5
EIF3D+MRPL54	7	2.5	128	2.1	4.3
STX5+TMED2	9	2.8	128	2.1	4.4
DCTN1+SPATA5L1	9	3	128	2.3	4.7
RRS1+THOC5	7	2.3	128	1.8	3.6
MYBL2+VPS54	6	3.9	128	3	6.6
PPP1R8+SAMM50	6	3.5	128	2.6	6.1
PSMC6+VPS54	5	3.4	128	2.7	6.2
DCTN1+TTK	7	3.6	128	2.5	6.1
CCNA2+UGP2	9	2.7	128	2	4.4
DCAF13+PPP1R8	8	4.7	128	3.5	7.2
EIF3D+SPCS3	7	3.4	127	2.7	5.9
ANAPC2+SCFD1	5	4	127	3	7.1
SAMM50+VPS52	7	3.8	127	3	6.3
COX7C+UBR4	7	3	127	2	5
HNRNPK+SCFD1	8	2.5	127	1.9	4.1
EIF3D+RAD21	9	2.5	127	2	4.1
DCTN1+SRP54	9	4.1	127	3.3	6.4
COG4+RRS1	8	2.5	127	1.9	4.1
COX7C+SON	7	3.1	127	2.1	5.1
COG3+SEC23IP	9	3.3	127	2.4	5.3
EIF6+SCFD1	8	2.2	127	1.7	3.8
PSMC1+RPS6	7	2.5	127	1.8	4.2
CCT4+STX5	9	3.7	126	2.9	5.9
THOC5+VPS52	8	2.9	126	1.9	4.6
AP2A1+VPS54	7	2.9	126	2.4	4.9
DCTN1+RPL35A	7	4.4	126	3.6	7.6
RPL35A+TRAPPC5	8	2.5	126	1.9	4.1
AKAP9+GOLIM4	9	-3.1	126	-4.7	-2.4
COPS4+RPS6	6	2.4	125	1.8	4.3
DCAF13+RAB14	9	2	125	1.5	3.2
PSMD11+SARS	5	2.3	125	1.8	3.8
ATP5A1+RRM1	7	4.1	125	3	6.7
DCTN1+GET4	9	3.8	125	2.8	6.2
COPS4+DCTN1	8	3	125	2.3	5.1
PPP1R8+SON	6	2.7	125	2.2	4.5
BAG6+SARS	8	3.5	125	2.6	5.6
DCTN1+RAB14	9	3.5	125	2.7	5.3
RRS1+SF3B2	5	2.6	125	2.1	4.6
PTPN1+VPS53	9	3.2	125	2.2	4.8
DCTN1+PSMD11	7	3.8	125	3	6.1
PSMD2+SCFD1	8	4.2	125	3.4	6.5
SEC24B+WRB	9	2	125	1.5	3.3
CCT4+UBR4	8	2.4	125	1.8	4
SF3A1+TRAPPC11	7	3.7	125	2.9	5.9
UTP20+VPS53	6	5.9	124	4.8	10
AP1M1+SEC23B	9	1.8	124	1.4	3
SPATA5L1+WDR43	8	2.5	124	1.8	4.1
DCAF13+VPS35	6	3	124	2.2	5.2
UBR4+WDR3	7	2.5	124	1.7	4.1
COG3+UGP2	9	3.5	124	2.6	5.3
TRAPPC5+WDR43	8	2.5	123	1.9	4.1
EIF3H+PSMC6	8	2.3	123	1.8	4
EIF3D+PSMD11	6	2.7	123	2.3	4.6
SCFD1+ST3GAL4	9	2.9	123	2.3	4.8
COPS4+EIF3D	9	3.9	123	2.7	5.9
GET4+SRP54	9	2.1	123	1.6	3.4
PSMC6+SCFD1	6	3.6	123	3.1	6.3
EIF6+SPPL3	9	3.1	123	2.2	4.7
PPP1R8+STX5	9	2.3	123	1.7	3.7
PPP1R8+RPL35A	6	3.4	123	2.5	6
CCNA2+SUCO	9	2.5	123	1.8	3.9
SRP54+SRPRB	9	2.7	123	1.9	4.4
PSMB6+TRAPPC5	8	4.2	123	3.1	6.5
SEC24B+TTK	8	3.5	123	2.6	5.6
EIF3H+SON	5	2.5	123	2	4.5
PSMA7+RTF1	5	2.6	122	2	4.6
COPB1+STX5	5	3.3	122	2.5	5.6
COPB1+SEC24A	6	2.6	122	1.9	4.4
EIF3H+RPL35A	7	4.5	122	3.3	7.2
SCFD1+SF3A1	5	3.9	122	3	7
SRPRB+STX5	9	2.8	122	2.1	4.5
MRPL54+SRPRB	7	2.3	122	1.6	3.9
DCTN1+SRPRB	7	3	122	2.2	4.9
SF3A1+SPATA5L1	7	2.5	122	1.8	4.2
SPATA5L1+TRAPPC5	9	2.6	122	2	4.1
PPP1R8+SF3B2	7	4.6	122	3.5	7.4
MRPL54+RTF1	7	2.4	122	1.7	4.1
COG3+PSMA7	7	2.3	122	1.6	4
DCAF13+PSMA7	7	2.9	122	2.1	4.9
RPL7L1+VPS52	8	2.8	122	2.1	4.5
ATP5A1+RPL35A	9	4.1	121	2.9	6.2
PSMB6+PTPN1	7	4.1	121	3.4	6.8
ARL1+UGP2	9	3	121	2.3	4.8
SF3B2+VPS52	8	4.1	121	2.9	6.4
EIF3H+SPATA5L1	8	2.6	121	2.1	4.3
RPL4+STX5	9	2.3	121	1.6	3.7
MGAT5+RAD21	9	-2.8	121	-4.4	-2.2
ATP5A1+EIF3H	9	2.3	121	1.7	3.6
EIF3L+VPS52	9	2.5	121	1.9	4
EIF3D+KDM1A	6	2.6	121	2.1	4.5
PPP1R8+SNRPD3	7	2.6	120	2	4.4
AP2A1+EIF3D	7	2.6	120	1.9	4.3
SPATA5L1+STX5	9	3.2	120	2.1	5.1
COPS4+DCAF13	8	2.5	120	1.9	4.2
COX7C+DCAF13	7	2.8	120	2.1	5
CHAF1A+SEC24B	9	3.2	120	2.4	4.8
CAMLG+RAD21	9	3.7	120	3	5.9
GOLIM4+SCFD1	9	2.6	120	2.1	4.3
DCAF13+PRPF39	8	2.3	120	1.7	3.9
KDM1A+RPL35A	7	3.9	120	2.7	6.4
COG3+EIF6	8	2.1	120	1.6	3.5
EIF3A+SCFD1	7	3.7	120	2.9	6
PSMC6+TRAPPC11	9	3.2	120	2.2	5.2
PSMD3+RTF1	5	3.3	119	2.3	6.1
UBR4+VPS35	7	5	119	3.9	8.2
ST3GAL4+WDR11	9	-3.8	119	-6.4	-3.2
PPP1R8+PSMB6	6	3.5	119	2.5	6
[truncated: 3,512 more rows]
