# Supplementary material for: Retro-2 protects cells from ricin toxicity by inhibiting ASNA1-mediated ER targeting and insertion of tail-anchored proteins
Source: eLife. 2019 Nov 1;8:e48434. doi: 10.7554/eLife.48434 (PMC6858068; doi:10.7554/eLife.48434)
Supplement: Figure 4—source data 1. [file elife-48434-fig4-data1.xlsx]

## Sheet: Legend
		Sheets	Description
		Starting	Sequencing of ASNA1 cDNA from starting population
		Replicate 1	Sequencing of ASNA1 cDNA from DHQZ36.1 treated population, replicate 1
		Replicate 2	Sequencing of ASNA1 cDNA from DHQZ36.1 treated population, replicate 2
	Columns
	CHR	bp	REF	A	G	C	T	del	ins	inserted	Depth	%_REF	Depth>500?
	Transcript model	Basepair position	reference base	number of reads containing base, deletion, or insertion						Sequence of insertion	Coverage at given base	% reads matching reference base	Filter for >500X coverage of base

## Sheet: Starting
CHR	bp	REF	A	G	C	T	del	ins	inserted	Depth	%_REF	Depth>500?
ASNA1-201	89	G	0	600	0	0	0	0	.	600	1	1
ASNA1-201	90	C	0	0	647	0	0	0	.	647	1	1
ASNA1-201	91	C	3	0	641	0	0	0	.	644	0.995342	1
ASNA1-201	92	T	0	0	0	650	0	0	.	650	1	1
ASNA1-201	93	A	760	0	2	0	0	0	.	762	0.997375	1
ASNA1-201	94	C	2	0	897	0	0	0	.	899	0.997775	1
ASNA1-201	95	A	862	0	0	0	0	0	.	862	1	1
ASNA1-201	96	C	1	0	1043	0	0	0	.	1044	0.999042	1
ASNA1-201	97	T	0	0	1	1029	0	0	.	1030	0.999029	1
ASNA1-201	98	T	0	0	0	1189	0	0	.	1189	1	1
ASNA1-201	99	A	1156	4	0	0	0	0	.	1160	0.996552	1
ASNA1-201	100	G	7	1159	15	3	0	0	.	1184	0.978885	1
ASNA1-201	101	C	3	1	1213	1	0	0	.	1218	0.995895	1
ASNA1-201	102	A	1173	0	2	0	0	0	.	1175	0.998298	1
ASNA1-201	103	A	1190	1	0	0	0	0	.	1191	0.99916	1
ASNA1-201	104	C	2	0	1291	0	0	0	.	1293	0.998453	1
ASNA1-201	105	A	1240	1	0	0	0	0	.	1241	0.999194	1
ASNA1-201	106	T	0	1	0	1526	0	0	.	1527	0.999345	1
ASNA1-201	107	C	2	0	1526	0	0	0	.	1528	0.998691	1
ASNA1-201	108	A	1526	0	0	0	0	0	.	1526	1	1
ASNA1-201	109	T	0	0	1	1549	0	0	.	1550	0.999355	1
ASNA1-201	110	C	6	0	1548	1	0	0	.	1555	0.995498	1
ASNA1-201	111	G	8	1548	0	1	0	0	.	1557	0.99422	1
ASNA1-201	112	A	1457	1	5	1	0	0	.	1464	0.995219	1
ASNA1-201	113	G	2	1575	11	3	0	0	.	1591	0.989943	1
ASNA1-201	114	C	0	1	1640	0	0	0	.	1641	0.999391	1
ASNA1-201	115	A	1508	1	5	0	0	0	.	1514	0.996037	1
ASNA1-201	116	G	2	1635	2	0	0	0	.	1639	0.997559	1
ASNA1-201	117	C	3	2	1662	3	0	0	.	1670	0.99521	1
ASNA1-201	118	G	1	1644	0	0	0	0	.	1645	0.999392	1
ASNA1-201	119	C	1	1	1668	0	0	0	.	1670	0.998802	1
ASNA1-201	120	A	1566	1	4	0	0	0	.	1571	0.996817	1
ASNA1-201	121	G	0	1739	1	0	0	0	.	1740	0.999425	1
ASNA1-201	122	C	4	1	1757	11	0	0	.	1773	0.990976	1
ASNA1-201	123	C	2	2	1752	0	0	0	.	1756	0.997722	1
ASNA1-201	124	T	0	1	1	1771	0	0	.	1773	0.998872	1
ASNA1-201	125	G	1	1813	4	0	0	0	.	1818	0.99725	1
ASNA1-201	126	A	1844	0	0	0	0	0	.	1844	1	1
ASNA1-201	127	A	1697	0	1	0	0	0	.	1698	0.999411	1
ASNA1-201	128	G	0	1870	0	0	0	0	.	1870	1	1
ASNA1-201	129	T	0	3	1	1823	0	0	.	1827	0.997811	1
ASNA1-201	130	G	2	1892	0	0	1	0	.	1895	0.998417	1
ASNA1-201	131	G	0	1926	0	1	0	0	.	1927	0.999481	1
ASNA1-201	132	A	1818	1	3	1	0	0	.	1823	0.997257	1
ASNA1-201	133	T	0	3	2	1934	0	0	.	1939	0.997421	1
ASNA1-201	134	C	6	5	1889	3	0	0	.	1903	0.992643	1
ASNA1-201	135	T	0	2	7	1881	0	0	.	1890	0.995238	1
ASNA1-201	136	T	0	1	0	1929	0	0	.	1930	0.999482	1
ASNA1-201	137	C	3	0	1971	2	0	0	.	1976	0.99747	1
ASNA1-201	138	G	1	1931	1	0	0	0	.	1933	0.998965	1
ASNA1-201	139	T	0	3	1	1884	0	0	.	1888	0.997881	1
ASNA1-201	140	C	6	2	1984	0	0	0	.	1992	0.995984	1
ASNA1-201	141	G	3	1920	0	1	2	0	.	1926	0.996885	1
ASNA1-201	142	G	1	1935	0	2	0	0	.	1938	0.998452	1
ASNA1-201	143	G	2	1963	0	1	0	0	.	1966	0.998474	1
ASNA1-201	144	G	0	2036	0	1	0	0	.	2037	0.999509	1
ASNA1-201	145	G	2	2055	1	3	0	0	.	2061	0.997089	1
ASNA1-201	146	C	3	1	2061	0	0	0	.	2065	0.998063	1
ASNA1-201	147	A	1980	0	1	0	1	0	.	1982	0.998991	1
ASNA1-201	148	A	2111	1	1	0	0	0	.	2113	0.999053	1
ASNA1-201	149	G	0	2173	0	5	0	0	.	2178	0.997704	1
ASNA1-201	150	G	0	2110	0	0	0	0	.	2110	1	1
ASNA1-201	151	G	1	2146	0	2	0	0	.	2149	0.998604	1
ASNA1-201	152	T	0	7	1	2129	0	0	.	2137	0.996256	1
ASNA1-201	153	G	1	2183	0	0	1	0	.	2185	0.999085	1
ASNA1-201	154	G	3	2284	0	2	0	0	.	2289	0.997816	1
ASNA1-201	155	T	0	1	2	2188	0	0	.	2191	0.998631	1
ASNA1-201	156	G	1	2265	0	1	0	0	.	2267	0.999118	1
ASNA1-201	157	T	1	5	1	2218	0	0	.	2225	0.996854	1
ASNA1-201	158	G	0	2321	1	1	1	0	.	2324	0.998709	1
ASNA1-201	159	G	2	2290	0	0	0	0	.	2292	0.999127	1
ASNA1-201	160	G	9	2300	0	0	0	0	.	2309	0.996102	1
ASNA1-201	161	C	3	4	2181	5	0	0	.	2193	0.994528	1
ASNA1-201	162	A	1774	1	5	0	0	0	.	1780	0.996629	1
ASNA1-201	163	A	1799	2	5	0	0	0	.	1806	0.996124	1
ASNA1-201	164	G	0	1845	0	1	0	0	.	1846	0.999458	1
ASNA1-201	165	A	1495	4	15	2	0	0	.	1516	0.986148	1
ASNA1-201	166	C	7	2	1771	0	1	0	.	1781	0.994385	1
ASNA1-201	167	C	6	0	1621	2	0	0	.	1629	0.995089	1
ASNA1-201	168	A	1471	1	11	1	0	0	.	1484	0.99124	1
ASNA1-201	169	C	6	0	1712	0	0	0	.	1718	0.996508	1
ASNA1-201	170	C	3	0	1659	0	0	0	.	1662	0.998195	1
ASNA1-201	171	T	1	1	1	1592	0	0	.	1595	0.998119	1
ASNA1-201	172	G	4	1589	0	5	0	0	.	1598	0.994368	1
ASNA1-201	173	C	2	0	1562	0	0	0	.	1564	0.998721	1
ASNA1-201	174	A	1433	2	3	0	0	0	.	1438	0.996523	1
ASNA1-201	175	G	0	1551	2	0	0	0	.	1553	0.998712	1
ASNA1-201	176	C	0	2	1564	0	0	0	.	1566	0.998723	1
ASNA1-201	177	T	0	5	2	1483	0	0	.	1490	0.995302	1
ASNA1-201	178	G	3	1578	1	0	1	0	.	1583	0.996841	1
ASNA1-201	179	C	2	0	1390	1	0	0	.	1393	0.997846	1
ASNA1-201	180	A	1273	0	5	0	0	0	.	1278	0.996088	1
ASNA1-201	181	G	1	1443	2	0	0	0	.	1446	0.997925	1
ASNA1-201	182	C	2	0	1430	5	0	0	.	1437	0.995129	1
ASNA1-201	183	C	3	0	1395	1	0	0	.	1399	0.997141	1
ASNA1-201	184	T	0	1	2	1390	0	0	.	1393	0.997846	1
ASNA1-201	185	G	0	1446	1	1	0	0	.	1448	0.998619	1
ASNA1-201	186	G	0	1425	1	2	0	0	.	1428	0.997899	1
ASNA1-201	187	C	3	0	1399	8	1	0	.	1411	0.991495	1
ASNA1-201	188	A	1310	1	2	0	0	0	.	1313	0.997715	1
ASNA1-201	189	G	0	1461	0	0	0	0	.	1461	1	1
ASNA1-201	190	T	0	2	5	1362	0	0	.	1369	0.994887	1
ASNA1-201	191	C	2	0	1390	0	0	0	.	1392	0.998563	1
ASNA1-201	192	C	3	0	1230	0	0	0	.	1233	0.997567	1
ASNA1-201	193	A	1248	0	1	0	0	0	.	1249	0.999199	1
ASNA1-201	194	G	0	1437	3	0	0	0	.	1440	0.997917	1
ASNA1-201	195	C	2	1	1404	0	0	0	.	1407	0.997868	1
ASNA1-201	196	T	0	1	0	1338	0	0	.	1339	0.999253	1
ASNA1-201	197	C	1	0	1467	0	0	0	.	1468	0.999319	1
ASNA1-201	198	T	0	0	2	1477	0	0	.	1479	0.998648	1
ASNA1-201	199	C	2	0	1514	0	1	0	.	1517	0.998022	1
ASNA1-201	200	C	3	0	1399	0	0	0	.	1402	0.99786	1
ASNA1-201	201	A	1393	0	0	0	0	0	.	1393	1	1
ASNA1-201	202	A	1376	1	0	0	0	0	.	1377	0.999274	1
ASNA1-201	203	G	0	1489	0	0	0	0	.	1489	1	1
ASNA1-201	204	G	0	1491	0	1	0	0	.	1492	0.99933	1
ASNA1-201	205	G	0	1492	0	1	0	0	.	1493	0.99933	1
ASNA1-201	206	G	1	1544	0	2	0	0	.	1547	0.998061	1
ASNA1-201	207	C	2	0	1514	0	0	0	.	1516	0.998681	1
ASNA1-201	208	G	2	1564	0	0	0	0	.	1566	0.998723	1
ASNA1-201	209	T	0	1	2	1449	0	0	.	1452	0.997934	1
ASNA1-201	210	G	1	1565	0	1	0	0	.	1567	0.998724	1
ASNA1-201	211	A	1597	0	3	0	0	0	.	1600	0.998125	1
ASNA1-201	212	G	0	1640	0	2	0	0	.	1642	0.998782	1
ASNA1-201	213	A	1577	2	3	0	0	0	.	1582	0.996839	1
ASNA1-201	214	G	0	1682	0	4	0	0	.	1686	0.997628	1
ASNA1-201	215	T	0	2	0	1638	0	0	.	1640	0.99878	1
ASNA1-201	216	G	3	1782	4	5	0	0	.	1794	0.993311	1
ASNA1-201	217	T	0	3	4	1654	1	0	.	1662	0.995187	1
ASNA1-201	218	T	0	5	2	1668	0	0	.	1675	0.995821	1
ASNA1-201	219	C	4	0	1593	0	0	0	.	1597	0.997495	1
ASNA1-201	220	T	0	0	3	1653	0	0	.	1656	0.998188	1
ASNA1-201	221	G	2	1744	0	2	0	0	.	1748	0.997712	1
ASNA1-201	222	A	1618	1	8	0	0	0	.	1627	0.994468	1
ASNA1-201	223	T	1	1	1	1675	0	0	.	1678	0.998212	1
ASNA1-201	224	C	2	0	1593	1	0	0	.	1596	0.99812	1
ASNA1-201	225	A	1602	0	3	0	0	0	.	1605	0.998131	1
ASNA1-201	226	T	0	0	0	1720	0	0	.	1720	1	1
ASNA1-201	227	C	1	1	1702	2	0	0	.	1706	0.997655	1
ASNA1-201	228	T	0	2	2	1673	0	0	.	1677	0.997615	1
ASNA1-201	229	C	3	0	1830	0	0	0	.	1833	0.998363	1
ASNA1-201	230	C	2	0	1797	0	0	0	.	1799	0.998888	1
ASNA1-201	231	A	1646	0	5	0	0	0	.	1651	0.996972	1
ASNA1-201	232	C	3	0	1747	0	0	0	.	1750	0.998286	1
ASNA1-201	233	A	1799	1	1	0	0	0	.	1801	0.99889	1
ASNA1-201	234	G	0	1845	0	3	0	0	.	1848	0.998377	1
ASNA1-201	235	A	1565	0	24	0	0	0	.	1589	0.984896	1
ASNA1-201	236	C	3	1	1902	1	0	0	.	1907	0.997378	1
ASNA1-201	237	C	2	0	1784	1	0	0	.	1787	0.998321	1
ASNA1-201	238	C	4	1	1890	0	0	0	.	1895	0.997361	1
ASNA1-201	239	A	1761	3	7	0	0	0	.	1771	0.994353	1
ASNA1-201	240	G	2	2003	0	3	0	0	.	2008	0.99751	1
ASNA1-201	241	C	2	0	2010	0	0	0	.	2012	0.999006	1
ASNA1-201	242	A	1768	0	7	0	0	0	.	1775	0.996056	1
ASNA1-201	243	C	1	1	1936	0	0	0	.	1938	0.998968	1
ASNA1-201	244	A	1933	1	3	0	0	0	.	1937	0.997935	1
ASNA1-201	245	C	3	1	2134	1	0	0	.	2139	0.997662	1
ASNA1-201	246	A	2056	1	4	1	0	0	.	2062	0.99709	1
ASNA1-201	247	A	2066	1	3	1	0	0	.	2071	0.997586	1
ASNA1-201	248	C	2	0	2134	0	0	0	.	2136	0.999064	1
ASNA1-201	249	A	2098	0	3	0	0	0	.	2101	0.998572	1
ASNA1-201	250	T	0	1	2	2246	0	0	.	2249	0.998666	1
ASNA1-201	251	C	7	0	2213	0	0	0	.	2220	0.996847	1
ASNA1-201	252	T	1	2	0	2270	0	0	.	2273	0.99868	1
ASNA1-201	253	C	1	0	2213	0	0	0	.	2214	0.999548	1
ASNA1-201	254	A	2143	2	1	0	0	0	.	2146	0.998602	1
ASNA1-201	255	G	14	2194	0	11	0	0	.	2219	0.988734	1
ASNA1-201	256	A	2198	1	5	0	0	0	.	2204	0.997278	1
ASNA1-201	257	T	0	2	5	2262	0	0	.	2269	0.996915	1
ASNA1-201	258	G	10	2288	0	12	0	0	.	2310	0.990476	1
ASNA1-201	259	C	3	5	2276	3	0	0	.	2287	0.99519	1
ASNA1-201	260	T	0	2	1	2280	0	0	.	2283	0.998686	1
ASNA1-201	261	T	0	1	11	2331	0	0	.	2343	0.994878	1
ASNA1-201	262	T	0	2	9	2362	0	0	.	2373	0.995365	1
ASNA1-201	263	T	0	0	0	2303	0	0	.	2303	1	1
ASNA1-201	264	G	1	2354	3	4	0	0	.	2362	0.996613	1
ASNA1-201	265	A	2098	0	24	1	0	0	.	2123	0.988224	1
ASNA1-201	266	C	4	0	2308	1	0	0	.	2313	0.997838	1
ASNA1-201	267	C	6	1	2191	0	0	0	.	2198	0.996815	1
ASNA1-201	268	A	2307	1	0	1	0	0	.	2309	0.999134	1
ASNA1-201	269	G	0	2362	1	1	0	0	.	2364	0.999154	1
ASNA1-201	270	A	2240	0	3	0	0	0	.	2243	0.998663	1
ASNA1-201	271	A	2218	0	0	0	0	0	.	2218	1	1
ASNA1-201	272	G	0	2289	1	0	0	0	.	2290	0.999563	1
ASNA1-201	273	T	0	4	1	2174	0	0	.	2179	0.997705	1
ASNA1-201	274	T	0	5	1	2415	0	0	.	2421	0.997522	1
ASNA1-201	275	C	5	0	2360	0	0	0	.	2365	0.997886	1
ASNA1-201	276	T	0	1	1	2470	0	0	.	2472	0.999191	1
ASNA1-201	277	C	3	0	2462	0	0	0	.	2465	0.998783	1
ASNA1-201	278	A	2393	1	1	0	0	0	.	2395	0.999165	1
ASNA1-201	279	A	2381	1	0	0	0	0	.	2382	0.99958	1
ASNA1-201	280	A	2336	0	1	0	0	0	.	2337	0.999572	1
ASNA1-201	281	G	0	2362	0	1	0	0	.	2363	0.999577	1
ASNA1-201	282	G	2	2342	0	4	0	0	.	2348	0.997445	1
ASNA1-201	283	T	0	6	1	2228	0	0	.	2235	0.996868	1
ASNA1-201	284	G	4	2429	0	2	0	0	.	2435	0.997536	1
ASNA1-201	285	C	8	1	2340	1	0	0	.	2350	0.995745	1
ASNA1-201	286	C	3	0	2363	0	0	0	.	2366	0.998732	1
ASNA1-201	287	T	0	1	9	2360	0	0	.	2370	0.995781	1
ASNA1-201	288	A	2316	0	4	1	0	0	.	2321	0.997846	1
ASNA1-201	289	C	2	2	2391	0	0	0	.	2395	0.99833	1
ASNA1-201	290	C	4	2	2169	0	0	0	.	2175	0.997241	1
ASNA1-201	291	A	2244	1	1	0	0	0	.	2246	0.99911	1
ASNA1-201	292	A	2244	1	2	0	0	0	.	2247	0.998665	1
ASNA1-201	293	G	0	2278	0	4	0	0	.	2282	0.998247	1
ASNA1-201	294	G	1	2317	1	1	0	0	.	2320	0.998707	1
ASNA1-201	295	T	0	13	2	2180	0	0	.	2195	0.993166	1
ASNA1-201	296	C	3	0	2303	0	0	0	.	2306	0.998699	1
ASNA1-201	297	A	2282	0	0	2	0	0	.	2284	0.999124	1
ASNA1-201	298	A	2270	0	2	1	0	0	.	2273	0.99868	1
ASNA1-201	299	A	2228	1	3	0	0	0	.	2232	0.998208	1
ASNA1-201	300	G	1	2423	0	3	0	0	.	2427	0.998352	1
ASNA1-201	301	G	19	2390	0	2	0	0	.	2411	0.99129	1
ASNA1-201	302	C	3	0	2341	0	0	0	.	2344	0.99872	1
ASNA1-201	303	T	0	2	1	2241	0	0	.	2244	0.998663	1
ASNA1-201	304	A	2287	1	2	3	0	0	.	2293	0.997383	1
ASNA1-201	305	T	1	2	7	2345	1	0	.	2356	0.995331	1
ASNA1-201	306	G	7	2342	10	0	0	0	.	2359	0.992794	1
ASNA1-201	307	A	2194	0	11	3	0	0	.	2208	0.993659	1
ASNA1-201	308	C	3	1	2152	0	0	0	.	2156	0.998145	1
ASNA1-201	309	A	2051	1	6	0	0	0	.	2058	0.996599	1
ASNA1-201	310	A	1951	1	9	1	0	0	.	1962	0.994393	1
ASNA1-201	311	C	5	0	2269	12	0	0	.	2286	0.992563	1
ASNA1-201	312	C	7	2	2264	0	0	0	.	2273	0.99604	1
ASNA1-201	313	T	0	1	0	2211	0	0	.	2212	0.999548	1
ASNA1-201	314	C	1	2	2267	5	0	0	.	2275	0.996484	1
ASNA1-201	315	T	0	2	3	2145	1	0	.	2151	0.997211	1
ASNA1-201	316	T	1	1	14	2334	1	0	.	2351	0.992769	1
ASNA1-201	317	T	2	1	2	2405	0	0	.	2410	0.997925	1
ASNA1-201	318	G	6	2545	15	5	0	0	.	2571	0.989887	1
ASNA1-201	319	C	4	4	2340	11	0	0	.	2359	0.991946	1
ASNA1-201	320	T	1	0	3	2343	0	0	.	2347	0.998296	1
ASNA1-201	321	A	2201	0	0	0	0	0	.	2201	1	1
ASNA1-201	322	T	3	3	1	2360	0	0	.	2367	0.997043	1
ASNA1-201	323	G	0	2369	0	3	1	0	.	2373	0.998314	1
ASNA1-201	324	G	5	2277	0	2	1	0	.	2285	0.996499	1
ASNA1-201	325	A	2254	3	0	6	1	0	.	2264	0.995583	1
ASNA1-201	326	G	9	2325	2	0	0	0	.	2336	0.995291	1
ASNA1-201	327	A	2226	1	4	0	0	0	.	2231	0.997759	1
ASNA1-201	328	T	0	3	5	2226	0	0	.	2234	0.996419	1
ASNA1-201	329	T	0	1	1	2314	0	0	.	2316	0.999136	1
ASNA1-201	330	G	2	2368	0	0	0	0	.	2370	0.999156	1
ASNA1-201	331	A	2091	0	26	1	0	0	.	2118	0.987252	1
ASNA1-201	332	C	2	0	2505	0	2	0	.	2509	0.998406	1
ASNA1-201	333	C	4	3	2430	3	0	0	.	2440	0.995902	1
ASNA1-201	334	C	4	0	2461	6	0	0	.	2471	0.995953	1
ASNA1-201	335	C	4	2	2492	0	0	0	.	2498	0.997598	1
ASNA1-201	336	A	2278	0	10	0	0	0	.	2288	0.995629	1
ASNA1-201	337	G	9	2548	0	2	0	0	.	2559	0.995701	1
ASNA1-201	338	C	1	0	2621	6	0	0	.	2628	0.997336	1
ASNA1-201	339	C	3	0	2502	0	0	0	.	2505	0.998802	1
ASNA1-201	340	T	1	5	0	2380	0	0	.	2386	0.997485	1
ASNA1-201	341	G	2	2524	2	0	0	0	.	2528	0.998418	1
ASNA1-201	342	G	2	2537	1	2	0	0	.	2542	0.998033	1
ASNA1-201	343	G	3	2627	0	2	0	0	.	2632	0.9981	1
ASNA1-201	344	C	4	1	2589	2	0	0	.	2596	0.997304	1
ASNA1-201	345	G	5	2577	0	2	0	0	.	2584	0.997291	1
ASNA1-201	346	T	0	18	5	2341	0	0	.	2364	0.990271	1
ASNA1-201	347	G	0	2579	0	3	0	0	.	2582	0.998838	1
ASNA1-201	348	G	1	2581	0	2	0	0	.	2584	0.998839	1
ASNA1-201	349	C	1	0	2472	0	0	0	.	2473	0.999596	1
ASNA1-201	350	G	0	2497	0	2	0	0	.	2499	0.9992	1
ASNA1-201	351	G	0	2495	0	5	0	0	.	2500	0.998	1
ASNA1-201	352	A	2365	0	16	0	0	0	.	2381	0.99328	1
ASNA1-201	353	G	8	2515	2	2	0	0	.	2527	0.995251	1
ASNA1-201	354	C	4	0	2458	0	0	0	.	2462	0.998375	1
ASNA1-201	355	T	0	5	0	2311	0	0	.	2316	0.997841	1
ASNA1-201	356	G	2	2529	0	1	0	0	.	2532	0.998815	1
ASNA1-201	357	C	4	0	2435	0	0	0	.	2439	0.99836	1
ASNA1-201	358	C	0	0	2385	2	0	0	.	2387	0.999162	1
ASNA1-201	359	T	0	4	3	2302	0	0	.	2309	0.996968	1
ASNA1-201	360	G	0	2479	1	1	0	0	.	2481	0.999194	1
ASNA1-201	361	A	2265	1	17	3	0	0	.	2286	0.990814	1
ASNA1-201	362	C	2	2	2409	1	0	0	.	2414	0.997929	1
ASNA1-201	363	G	0	2449	0	1	0	0	.	2450	0.999592	1
ASNA1-201	364	A	2455	2	0	1	0	0	.	2458	0.998779	1
ASNA1-201	365	G	0	2489	0	2	0	0	.	2491	0.999197	1
ASNA1-201	366	T	0	9	7	2226	0	0	.	2242	0.992864	1
ASNA1-201	367	T	0	14	1	2320	0	0	.	2335	0.993576	1
ASNA1-201	368	C	3	1	2336	1	0	0	.	2341	0.997864	1
ASNA1-201	369	T	0	0	2	2210	0	0	.	2212	0.999096	1
ASNA1-201	370	T	0	4	1	2390	0	0	.	2395	0.997912	1
ASNA1-201	371	C	3	0	2415	0	0	0	.	2418	0.998759	1
ASNA1-201	372	G	0	2461	1	0	0	0	.	2462	0.999594	1
ASNA1-201	373	A	2409	0	3	0	0	0	.	2412	0.998756	1
ASNA1-201	374	G	0	2463	2	2	0	0	.	2467	0.998379	1
ASNA1-201	375	G	1	2336	0	2	0	0	.	2339	0.998717	1
ASNA1-201	376	A	2282	3	1	1	0	0	.	2287	0.997814	1
ASNA1-201	377	G	0	2266	0	3	0	0	.	2269	0.998678	1
ASNA1-201	378	G	0	2357	0	1	0	0	.	2358	0.999576	1
ASNA1-201	379	A	2312	0	5	2	0	0	.	2319	0.996981	1
ASNA1-201	380	C	3	1	2487	0	0	0	.	2491	0.998394	1
ASNA1-201	381	A	2506	1	2	0	0	0	.	2509	0.998804	1
ASNA1-201	382	A	2575	0	3	0	0	0	.	2578	0.998836	1
ASNA1-201	383	C	1	0	2595	1	0	0	.	2597	0.99923	1
ASNA1-201	384	A	2553	0	3	0	0	0	.	2556	0.998826	1
ASNA1-201	385	T	0	4	0	2542	0	0	.	2546	0.998429	1
ASNA1-201	386	G	5	2376	1	3	0	0	.	2385	0.996226	1
ASNA1-201	387	C	2	0	2343	0	0	0	.	2345	0.999147	1
ASNA1-201	388	T	1	6	2	2196	0	0	.	2205	0.995918	1
ASNA1-201	389	G	0	2333	0	3	0	0	.	2336	0.998716	1
ASNA1-201	390	A	2279	0	10	0	0	0	.	2289	0.995631	1
ASNA1-201	391	G	5	2343	1	0	0	0	.	2349	0.997446	1
ASNA1-201	392	C	0	0	2275	2	0	0	.	2277	0.999122	1
ASNA1-201	393	A	2217	1	3	1	0	0	.	2222	0.99775	1
ASNA1-201	394	T	0	0	1	2174	0	0	.	2175	0.99954	1
ASNA1-201	395	G	1	2238	0	2	0	0	.	2241	0.998661	1
ASNA1-201	396	G	0	2340	0	5	0	0	.	2345	0.997868	1
ASNA1-201	397	G	3	2310	1	1	0	0	.	2315	0.99784	1
ASNA1-201	398	C	4	0	2334	0	0	0	.	2338	0.998289	1
ASNA1-201	399	A	2282	0	2	1	0	0	.	2285	0.998687	1
ASNA1-201	400	A	2240	1	1	0	0	0	.	2242	0.999108	1
ASNA1-201	401	G	1	2351	0	4	0	0	.	2356	0.997878	1
ASNA1-201	402	A	2268	1	1	1	0	0	.	2271	0.998679	1
ASNA1-201	403	A	2223	0	3	1	0	0	.	2227	0.998204	1
ASNA1-201	404	G	2	2201	1	4	0	0	.	2208	0.99683	1
ASNA1-201	405	A	2301	0	3	1	0	0	.	2305	0.998265	1
ASNA1-201	406	T	0	2	2	2139	0	0	.	2143	0.998133	1
ASNA1-201	407	G	0	2191	0	2	0	0	.	2193	0.999088	1
ASNA1-201	408	A	2234	0	2	2	0	0	.	2238	0.998213	1
ASNA1-201	409	T	0	3	0	2178	0	0	.	2181	0.998624	1
ASNA1-201	410	G	0	2308	0	3	0	0	.	2311	0.998702	1
ASNA1-201	411	C	10	1	2232	0	0	0	.	2243	0.995096	1
ASNA1-201	412	A	2170	1	1	0	0	0	.	2172	0.999079	1
ASNA1-201	413	G	2	2193	0	6	0	0	.	2201	0.996365	1
ASNA1-201	414	G	0	2207	2	2	0	0	.	2211	0.998191	1
ASNA1-201	415	A	2139	0	3	1	0	0	.	2143	0.998133	1
ASNA1-201	416	G	0	2199	0	1	0	0	.	2200	0.999545	1
ASNA1-201	417	G	2	2257	0	1	0	0	.	2260	0.998673	1
ASNA1-201	418	C	5	0	2278	4	0	0	.	2287	0.996065	1
ASNA1-201	419	C	2	0	2220	2	0	0	.	2224	0.998201	1
ASNA1-201	420	A	2254	1	2	0	0	0	.	2257	0.998671	1
ASNA1-201	421	T	0	4	3	2187	0	0	.	2194	0.996809	1
ASNA1-201	422	G	0	2249	1	1	0	0	.	2251	0.999112	1
ASNA1-201	423	A	2090	2	12	0	0	0	.	2104	0.993346	1
ASNA1-201	424	G	0	2229	1	5	0	0	.	2235	0.997315	1
ASNA1-201	425	C	5	0	2259	1	0	0	.	2265	0.997351	1
ASNA1-201	426	G	2	2272	0	2	0	0	.	2276	0.998243	1
ASNA1-201	427	C	3	0	2281	1	0	0	.	2285	0.998249	1
ASNA1-201	428	A	2262	0	1	1	0	0	.	2264	0.999117	1
ASNA1-201	429	T	0	1	0	2130	0	0	.	2131	0.999531	1
ASNA1-201	430	T	2	0	3	2211	0	0	.	2216	0.997744	1
ASNA1-201	431	T	0	1	4	2281	0	0	.	2286	0.997813	1
ASNA1-201	432	C	5	0	2347	1	0	0	.	2353	0.99745	1
ASNA1-201	433	C	2	0	2308	0	0	0	.	2310	0.999134	1
ASNA1-201	434	C	2	0	2311	3	0	0	.	2316	0.997841	1
ASNA1-201	435	G	8	2243	0	2	0	0	.	2253	0.995561	1
ASNA1-201	436	G	8	2239	0	1	0	0	.	2248	0.995996	1
ASNA1-201	437	C	4	0	2388	0	0	0	.	2392	0.998328	1
ASNA1-201	438	A	2291	0	2	0	0	0	.	2293	0.999128	1
ASNA1-201	439	T	0	6	0	2225	0	0	.	2231	0.997311	1
ASNA1-201	440	C	2	1	2416	1	0	0	.	2420	0.998347	1
ASNA1-201	441	G	2	2460	1	1	0	0	.	2464	0.998377	1
ASNA1-201	442	A	2447	0	5	0	0	0	.	2452	0.997961	1
ASNA1-201	443	T	0	6	1	2261	0	0	.	2268	0.996914	1
ASNA1-201	444	G	1	2421	0	4	0	0	.	2426	0.997939	1
ASNA1-201	445	A	2349	0	4	1	0	0	.	2354	0.997876	1
ASNA1-201	446	G	2	2391	0	3	0	0	.	2396	0.997913	1
ASNA1-201	447	G	5	2482	2	2	0	0	.	2491	0.996387	1
ASNA1-201	448	C	2	0	2476	1	0	0	.	2479	0.99879	1
ASNA1-201	449	C	4	0	2392	0	0	0	.	2396	0.998331	1
ASNA1-201	450	A	2421	0	2	0	0	0	.	2423	0.999175	1
ASNA1-201	451	T	1	5	1	2343	0	0	.	2350	0.997021	1
ASNA1-201	452	G	0	2441	1	2	0	0	.	2444	0.998773	1
ASNA1-201	453	A	2404	1	6	0	0	0	.	2411	0.997097	1
ASNA1-201	454	G	1	2528	8	3	0	0	.	2540	0.995276	1
ASNA1-201	455	C	4	0	2422	7	0	0	.	2433	0.995479	1
ASNA1-201	456	T	0	0	5	2392	0	0	.	2397	0.997914	1
ASNA1-201	457	A	2469	1	2	0	0	0	.	2472	0.998786	1
ASNA1-201	458	T	1	5	3	2345	0	0	.	2354	0.996177	1
ASNA1-201	459	G	0	2476	0	2	0	0	.	2478	0.999193	1
ASNA1-201	460	C	0	3	2345	7	0	0	.	2355	0.995754	1
ASNA1-201	461	C	0	1	2295	0	0	0	.	2296	0.999564	1
ASNA1-201	462	G	0	2320	0	2	0	0	.	2322	0.999139	1
ASNA1-201	463	A	2282	0	1	0	0	0	.	2283	0.999562	1
ASNA1-201	464	G	1	2335	0	6	0	0	.	2342	0.997011	1
ASNA1-201	465	G	3	2653	0	0	0	0	.	2656	0.99887	1
ASNA1-201	466	T	2	24	4	2253	0	0	.	2283	0.986859	1
ASNA1-201	467	C	6	2	2564	0	0	0	.	2572	0.99689	1
ASNA1-201	468	A	2534	3	2	1	0	0	.	2540	0.997638	1
ASNA1-201	469	T	0	3	7	2448	0	0	.	2458	0.995932	1
ASNA1-201	470	G	0	2588	1	0	0	0	.	2589	0.999614	1
ASNA1-201	471	A	2495	3	9	1	0	0	.	2508	0.994817	1
ASNA1-201	472	G	0	2503	1	3	2	0	.	2509	0.997609	1
ASNA1-201	473	G	5	2474	0	2	0	0	.	2481	0.997179	1
ASNA1-201	474	C	4	5	2428	1	0	0	.	2438	0.995898	1
ASNA1-201	475	T	1	13	10	2243	0	0	.	2267	0.989413	1
ASNA1-201	476	G	0	2535	0	7	0	0	.	2542	0.997246	1
ASNA1-201	477	G	0	2559	0	4	0	0	.	2563	0.998439	1
ASNA1-201	478	T	1	9	2	2191	0	0	.	2203	0.994553	1
ASNA1-201	479	G	1	2480	0	3	0	0	.	2484	0.99839	1
ASNA1-201	480	A	2309	0	5	0	0	0	.	2314	0.997839	1
ASNA1-201	481	A	2274	0	3	1	0	0	.	2278	0.998244	1
ASNA1-201	482	G	2	2341	0	2	0	0	.	2345	0.998294	1
ASNA1-201	483	G	1	2317	1	2	0	0	.	2321	0.998277	1
ASNA1-201	484	G	6	2377	2	3	0	0	.	2388	0.995394	1
ASNA1-201	485	C	4	1	2405	4	0	0	.	2414	0.996272	1
ASNA1-201	486	A	2376	1	0	1	0	0	.	2378	0.999159	1
ASNA1-201	487	T	0	7	9	2295	0	0	.	2311	0.993077	1
ASNA1-201	488	G	0	2366	0	5	0	0	.	2371	0.997891	1
ASNA1-201	489	A	2436	0	6	0	0	0	.	2442	0.997543	1
ASNA1-201	490	A	2316	1	3	0	0	0	.	2320	0.998276	1
ASNA1-201	491	C	4	9	2431	3	0	0	.	2447	0.993461	1
ASNA1-201	492	T	0	1	1	2320	0	0	.	2322	0.999139	1
ASNA1-201	493	T	0	4	0	2509	0	0	.	2513	0.998408	1
ASNA1-201	494	C	1	0	2562	0	0	0	.	2563	0.99961	1
ASNA1-201	495	T	0	4	2	2506	0	0	.	2512	0.997611	1
ASNA1-201	496	C	1	1	2499	0	0	0	.	2501	0.9992	1
ASNA1-201	497	G	5	2472	0	5	0	0	.	2482	0.995971	1
ASNA1-201	498	G	0	2514	0	1	0	0	.	2515	0.999602	1
ASNA1-201	499	T	2	11	2	2205	0	0	.	2220	0.993243	1
ASNA1-201	500	G	0	2471	0	2	0	0	.	2473	0.999191	1
ASNA1-201	501	G	1	2504	1	3	0	0	.	2509	0.998007	1
ASNA1-201	502	T	1	7	0	2153	0	0	.	2161	0.996298	1
ASNA1-201	503	G	0	2307	1	10	0	0	.	2318	0.995255	1
ASNA1-201	504	G	0	2720	3	3	0	0	.	2726	0.997799	1
ASNA1-201	505	T	0	6	1	2508	0	0	.	2515	0.997217	1
ASNA1-201	506	A	2564	0	2	1	0	0	.	2567	0.998831	1
ASNA1-201	507	T	0	0	5	2546	1	0	.	2552	0.997649	1
ASNA1-201	508	T	0	1	1	2591	0	0	.	2593	0.999229	1
ASNA1-201	509	T	0	2	4	2566	0	0	.	2572	0.997667	1
ASNA1-201	510	G	0	2589	1	1	0	0	.	2591	0.999228	1
ASNA1-201	511	A	2393	1	11	1	0	0	.	2406	0.994597	1
ASNA1-201	512	C	5	5	2456	1	0	0	.	2467	0.995541	1
ASNA1-201	513	A	2416	0	9	0	0	0	.	2425	0.996289	1
ASNA1-201	514	C	3	0	2428	1	0	0	.	2432	0.998355	1
ASNA1-201	515	G	1	2513	0	3	0	0	.	2517	0.998411	1
ASNA1-201	516	G	2	2521	0	1	0	0	.	2524	0.998811	1
ASNA1-201	517	C	1	0	2586	0	0	0	.	2587	0.999613	1
ASNA1-201	518	A	2302	0	9	1	0	0	.	2312	0.995675	1
ASNA1-201	519	C	0	0	2701	1	0	0	.	2702	0.99963	1
ASNA1-201	520	C	3	0	2624	0	0	0	.	2627	0.998858	1
ASNA1-201	521	C	2	0	2536	1	0	0	.	2539	0.998818	1
ASNA1-201	522	A	2329	2	7	1	0	0	.	2339	0.995725	1
ASNA1-201	523	C	1	1	2548	0	0	0	.	2550	0.999216	1
ASNA1-201	524	G	0	2555	0	2	0	0	.	2557	0.999218	1
ASNA1-201	525	G	0	2629	0	2	0	0	.	2631	0.99924	1
ASNA1-201	526	G	1	2678	0	1	0	0	.	2680	0.999254	1
ASNA1-201	527	C	3	0	2596	0	0	0	.	2599	0.998846	1
ASNA1-201	528	C	2	0	2533	1	0	0	.	2536	0.998817	1
ASNA1-201	529	A	2340	1	6	0	0	0	.	2347	0.997017	1
ASNA1-201	530	C	5	0	2627	0	0	0	.	2632	0.9981	1
ASNA1-201	531	A	2273	0	10	0	0	0	.	2283	0.99562	1
ASNA1-201	532	C	1	0	2876	0	0	0	.	2877	0.999652	1
ASNA1-201	533	C	6	1	2678	0	0	0	.	2685	0.997393	1
ASNA1-201	534	C	4	0	2741	0	0	0	.	2745	0.998543	1
ASNA1-201	535	T	0	3	3	2669	0	0	.	2675	0.997757	1
ASNA1-201	536	G	0	2777	0	3	0	0	.	2780	0.998921	1
ASNA1-201	537	A	2573	1	7	1	0	0	.	2582	0.996514	1
ASNA1-201	538	G	0	2743	0	1	0	0	.	2744	0.999636	1
ASNA1-201	539	G	2	2724	0	1	0	0	.	2727	0.9989	1
ASNA1-201	540	C	1	0	2364	1	0	0	.	2366	0.999155	1
ASNA1-201	541	T	1	7	0	2213	0	0	.	2221	0.996398	1
ASNA1-201	542	G	5	2493	4	5	0	0	.	2507	0.994416	1
ASNA1-201	543	C	3	0	2425	2	0	0	.	2430	0.997942	1
ASNA1-201	544	T	1	9	3	2281	0	0	.	2294	0.994333	1
ASNA1-201	545	C	2	5	2399	0	0	0	.	2406	0.997091	1
ASNA1-201	546	A	2338	0	2	1	0	1	G	2342	0.998292	1
ASNA1-201	547	A	2235	2	9	0	0	0	.	2246	0.995102	1
ASNA1-201	548	C	0	2	2487	0	0	0	.	2489	0.999196	1
ASNA1-201	549	T	1	2	1	2344	0	0	.	2348	0.998296	1
ASNA1-201	550	T	0	1	4	2507	0	0	.	2512	0.99801	1
ASNA1-201	551	C	2	0	2590	0	2	0	.	2594	0.998458	1
ASNA1-201	552	C	5	2	2606	0	0	0	.	2613	0.997321	1
ASNA1-201	553	C	7	1	2548	2	0	0	.	2558	0.996091	1
ASNA1-201	554	C	6	1	2530	0	0	0	.	2537	0.997241	1
ASNA1-201	555	A	2030	4	10	1	0	0	.	2045	0.992665	1
ASNA1-201	556	C	3	1	2594	0	0	0	.	2598	0.99846	1
ASNA1-201	557	C	4	0	2459	0	0	0	.	2463	0.998376	1
ASNA1-201	558	A	2406	2	4	0	0	0	.	2412	0.997512	1
ASNA1-201	559	T	3	7	3	2532	0	0	.	2545	0.994892	1
ASNA1-201	560	C	2	0	2725	0	0	0	.	2727	0.999267	1
ASNA1-201	561	G	2	2690	1	5	0	0	.	2698	0.997035	1
ASNA1-201	562	T	2	16	2	2383	0	0	.	2403	0.991677	1
ASNA1-201	563	G	1	2639	0	10	0	0	.	2650	0.995849	1
ASNA1-201	564	G	0	2656	0	4	0	0	.	2660	0.998496	1
ASNA1-201	565	A	2503	1	11	1	0	0	.	2516	0.994833	1
ASNA1-201	566	G	4	2683	0	0	0	0	.	2687	0.998511	1
ASNA1-201	567	C	3	2	2622	3	0	0	.	2630	0.996958	1
ASNA1-201	568	G	6	2620	1	2	1	0	.	2630	0.996198	1
ASNA1-201	569	G	1	2607	0	3	0	0	.	2611	0.998468	1
ASNA1-201	570	G	0	2668	0	1	0	0	.	2669	0.999625	1
ASNA1-201	571	G	1	2759	0	4	0	0	.	2764	0.998191	1
ASNA1-201	572	C	1	1	2689	0	0	0	.	2691	0.999257	1
ASNA1-201	573	C	1	1	2612	0	0	0	.	2614	0.999235	1
ASNA1-201	574	T	0	8	4	2447	0	0	.	2459	0.99512	1
ASNA1-201	575	G	1	2693	3	7	0	0	.	2704	0.995932	1
ASNA1-201	576	G	1	2727	0	1	0	0	.	2729	0.999267	1
ASNA1-201	577	G	2	2735	0	5	0	0	.	2742	0.997447	1
ASNA1-201	578	C	3	0	2602	0	0	0	.	2605	0.998848	1
ASNA1-201	579	C	4	0	2475	0	0	0	.	2479	0.998386	1
ASNA1-201	580	G	4	2409	0	1	0	0	.	2414	0.997929	1
ASNA1-201	581	G	1	2566	1	5	0	0	.	2573	0.997279	1
ASNA1-201	582	C	3	0	2561	2	0	0	.	2566	0.998051	1
ASNA1-201	583	T	0	7	1	2425	1	0	.	2434	0.996302	1
ASNA1-201	584	T	1	3	4	2596	0	0	.	2604	0.996928	1
ASNA1-201	585	A	2655	0	0	1	0	0	.	2656	0.999623	1
ASNA1-201	586	T	0	2	1	2602	0	0	.	2605	0.998848	1
ASNA1-201	587	G	3	2631	0	2	0	0	.	2636	0.998103	1
ASNA1-201	588	C	3	0	2304	0	0	0	.	2307	0.9987	1
ASNA1-201	589	A	2277	0	2	0	1	0	.	2280	0.998684	1
ASNA1-201	590	G	2	2391	1	4	0	0	.	2398	0.997081	1
ASNA1-201	591	A	2360	2	5	0	0	0	.	2367	0.997043	1
ASNA1-201	592	T	1	6	1	2321	0	0	.	2329	0.996565	1
ASNA1-201	593	C	3	1	2335	0	0	0	.	2339	0.99829	1
ASNA1-201	594	A	2388	0	0	0	0	0	.	2388	1	1
ASNA1-201	595	A	2351	0	1	2	0	0	.	2354	0.998726	1
ASNA1-201	596	G	3	2306	12	7	0	0	.	2328	0.99055	1
ASNA1-201	597	A	2269	0	13	0	0	0	.	2282	0.994303	1
ASNA1-201	598	A	2114	1	7	0	0	0	.	2122	0.99623	1
ASNA1-201	599	C	3	0	2354	0	0	0	.	2357	0.998727	1
ASNA1-201	600	C	1	1	2219	0	0	0	.	2221	0.9991	1
ASNA1-201	601	A	2197	2	2	0	0	0	.	2201	0.998183	1
ASNA1-201	602	G	2	2183	0	2	0	0	.	2187	0.998171	1
ASNA1-201	603	A	2175	1	7	0	0	0	.	2183	0.996335	1
ASNA1-201	604	T	1	5	1	2134	0	0	.	2141	0.99673	1
ASNA1-201	605	C	2	0	1916	0	0	0	.	1918	0.998957	1
ASNA1-201	606	A	1847	0	6	0	0	0	.	1853	0.996762	1
ASNA1-201	607	G	1	1894	0	6	0	0	.	1901	0.996318	1
ASNA1-201	608	C	6	0	1969	3	0	0	.	1978	0.99545	1
ASNA1-201	609	C	1	0	1940	2	0	1	G	1944	0.997942	1
ASNA1-201	610	C	1	1	1900	0	0	0	.	1902	0.998948	1
ASNA1-201	611	T	1	4	2	1841	0	0	.	1848	0.996212	1
ASNA1-201	612	T	0	2	3	1897	0	0	.	1902	0.997371	1
ASNA1-201	613	T	0	0	0	2011	0	0	.	2011	1	1
ASNA1-201	614	C	3	0	2007	1	0	0	.	2011	0.998011	1
ASNA1-201	615	A	1919	0	2	0	0	1	G	1922	0.998439	1
ASNA1-201	616	T	0	4	0	1945	0	0	.	1949	0.997948	1
ASNA1-201	617	C	1	2	1963	0	0	0	.	1966	0.998474	1
ASNA1-201	618	T	0	0	2	1897	0	0	.	1899	0.998947	1
ASNA1-201	619	C	2	0	1945	0	0	0	.	1947	0.998973	1
ASNA1-201	620	A	1798	0	3	0	0	1	T	1802	0.99778	1
ASNA1-201	621	C	0	1	1908	1	0	0	.	1910	0.998953	1
ASNA1-201	622	A	1813	2	6	0	0	0	.	1821	0.995607	1
ASNA1-201	623	G	0	1832	0	4	0	0	.	1836	0.997821	1
ASNA1-201	624	A	1693	0	5	0	0	0	.	1698	0.997055	1
ASNA1-201	625	T	0	3	1	1678	0	0	.	1682	0.997622	1
ASNA1-201	626	G	2	1692	0	5	0	0	.	1699	0.99588	1
ASNA1-201	627	T	1	2	0	1617	0	0	.	1620	0.998148	1
ASNA1-201	628	G	1	1718	0	2	0	0	.	1721	0.998257	1
ASNA1-201	629	C	3	0	1707	2	0	0	.	1712	0.997079	1
ASNA1-201	630	A	1639	0	0	1	0	0	.	1640	0.99939	1
ASNA1-201	631	A	1551	0	1	0	0	0	.	1552	0.999356	1
ASNA1-201	632	C	0	1	1529	3	0	0	.	1533	0.997391	1
ASNA1-201	633	A	1521	2	2	2	0	0	.	1527	0.996071	1
ASNA1-201	634	T	0	2	1	1415	0	0	.	1418	0.997884	1
ASNA1-201	635	G	0	1493	0	1	0	0	.	1494	0.999331	1
ASNA1-201	636	C	1	1	1422	2	0	0	.	1426	0.997195	1
ASNA1-201	637	T	0	4	2	1245	0	0	.	1251	0.995204	1
ASNA1-201	638	G	3	1394	0	1	0	0	.	1398	0.997139	1
ASNA1-201	639	G	1	1423	1	0	0	0	.	1425	0.998596	1
ASNA1-201	640	G	1	1417	0	0	0	0	.	1418	0.999295	1
ASNA1-201	641	C	2	0	1330	1	0	0	.	1333	0.997749	1
ASNA1-201	642	C	1	0	1262	2	0	0	.	1265	0.997628	1
ASNA1-201	643	T	0	4	0	1155	0	0	.	1159	0.996549	1
ASNA1-201	644	G	0	1392	0	0	2	0	.	1394	0.998565	1
ASNA1-201	645	G	0	1358	0	0	0	0	.	1358	1	1
ASNA1-201	646	G	0	1362	0	3	0	0	.	1365	0.997802	1
ASNA1-201	647	G	0	1347	0	1	0	0	.	1348	0.999258	1
ASNA1-201	648	G	1	1302	0	2	0	0	.	1305	0.997701	1
ASNA1-201	649	A	1307	0	4	0	0	0	.	1311	0.996949	1
ASNA1-201	650	C	3	1	1315	0	0	0	.	1319	0.996967	1
ASNA1-201	651	A	1353	0	1	0	0	0	.	1354	0.999261	1
ASNA1-201	652	T	0	3	1	1297	0	0	.	1301	0.996925	1
ASNA1-201	653	G	1	1437	0	4	0	0	.	1442	0.996533	1
ASNA1-201	654	A	1408	1	1	2	0	0	.	1412	0.997167	1
ASNA1-201	655	A	1310	1	4	0	0	0	.	1315	0.996198	1
ASNA1-201	656	C	0	0	1412	0	0	0	.	1412	1	1
ASNA1-201	657	G	4	1337	1	3	0	0	.	1345	0.994052	1
ASNA1-201	658	C	0	1	1362	1	0	0	.	1364	0.998534	1
ASNA1-201	659	A	1341	1	0	0	0	0	.	1342	0.999255	1
ASNA1-201	660	G	2	1356	3	4	0	0	.	1365	0.993407	1
ASNA1-201	661	A	1359	0	5	0	0	0	.	1364	0.996334	1
ASNA1-201	662	C	0	0	1451	0	0	0	.	1451	1	1
ASNA1-201	663	C	2	0	1344	2	0	0	.	1348	0.997033	1
ASNA1-201	664	A	1336	0	3	0	0	0	.	1339	0.99776	1
ASNA1-201	665	G	0	1379	0	2	0	0	.	1381	0.998552	1
ASNA1-201	666	C	1	0	1377	0	0	0	.	1378	0.999274	1
ASNA1-201	667	T	2	6	1	1246	0	0	.	1255	0.992829	1
ASNA1-201	668	G	0	1253	2	2	0	0	.	1257	0.996818	1
ASNA1-201	669	G	0	1341	0	2	0	0	.	1343	0.998511	1
ASNA1-201	670	C	1	1	1360	0	0	0	.	1362	0.998532	1
ASNA1-201	671	C	0	0	1334	0	0	0	.	1334	1	1
ASNA1-201	672	T	1	2	1	1242	0	0	.	1246	0.99679	1
ASNA1-201	673	C	0	0	1336	1	0	0	.	1337	0.999252	1
ASNA1-201	674	C	1	0	1459	1	0	0	.	1461	0.998631	1
ASNA1-201	675	A	1404	0	2	1	0	0	.	1407	0.997868	1
ASNA1-201	676	A	1339	0	4	0	0	0	.	1343	0.997022	1
ASNA1-201	677	G	0	1423	0	0	0	0	.	1423	1	1
ASNA1-201	678	C	1	1	1408	0	0	0	.	1410	0.998582	1
ASNA1-201	679	T	0	1	4	1257	0	0	.	1262	0.996038	1
ASNA1-201	680	G	0	1409	0	2	0	0	.	1411	0.998583	1
ASNA1-201	681	G	0	1397	1	2	0	0	.	1400	0.997857	1
ASNA1-201	682	A	1434	0	0	1	0	0	.	1435	0.999303	1
ASNA1-201	683	G	0	1432	0	3	0	0	.	1435	0.997909	1
ASNA1-201	684	G	0	1467	0	2	0	0	.	1469	0.998639	1
ASNA1-201	685	A	1532	0	1	0	0	0	.	1533	0.999348	1
ASNA1-201	686	G	0	1489	0	2	0	0	.	1491	0.998659	1
ASNA1-201	687	A	1508	1	4	1	0	0	.	1514	0.996037	1
ASNA1-201	688	C	1	0	1503	0	0	0	.	1504	0.999335	1
ASNA1-201	689	G	0	1506	0	0	0	0	.	1506	1	1
ASNA1-201	690	C	2	1	1513	0	0	0	.	1516	0.998021	1
ASNA1-201	691	T	0	2	0	1326	0	0	.	1328	0.998494	1
ASNA1-201	692	G	0	1596	0	2	0	0	.	1598	0.998748	1
ASNA1-201	693	C	0	0	1603	1	0	0	.	1604	0.999377	1
ASNA1-201	694	C	4	0	1579	0	0	0	.	1583	0.997473	1
ASNA1-201	695	C	1	0	1607	1	0	0	.	1609	0.998757	1
ASNA1-201	696	G	0	1722	0	3	0	0	.	1725	0.998261	1
ASNA1-201	697	T	0	8	1	1496	0	0	.	1505	0.99402	1
ASNA1-201	698	C	3	0	1736	0	0	0	.	1739	0.998275	1
ASNA1-201	699	A	1750	0	2	0	0	0	.	1752	0.998858	1
ASNA1-201	700	T	1	1	0	1699	0	0	.	1701	0.998824	1
ASNA1-201	701	C	2	0	1797	0	0	0	.	1799	0.998888	1
ASNA1-201	702	C	0	0	1788	1	0	0	.	1789	0.999441	1
ASNA1-201	703	G	4	1808	1	1	0	0	.	1814	0.996692	1
ASNA1-201	704	C	1	0	1820	0	0	0	.	1821	0.999451	1
ASNA1-201	705	T	0	10	0	1661	0	0	.	1671	0.994016	1
ASNA1-201	706	C	1	0	1764	4	0	0	.	1769	0.997174	1
ASNA1-201	707	A	1763	1	2	0	0	0	.	1766	0.998301	1
ASNA1-201	708	G	0	1903	5	4	0	0	.	1912	0.995293	1
ASNA1-201	709	T	1	9	1	1737	0	0	.	1748	0.993707	1
ASNA1-201	710	C	2	0	1960	0	0	0	.	1962	0.998981	1
ASNA1-201	711	A	1892	0	1	1	0	0	.	1894	0.998944	1
ASNA1-201	712	G	9	2191	2	3	0	0	.	2205	0.993651	1
ASNA1-201	713	C	1	1	2295	0	0	0	.	2297	0.999129	1
ASNA1-201	714	G	0	2273	1	7	0	0	.	2281	0.996493	1
ASNA1-201	715	A	2341	0	4	1	0	0	.	2346	0.997869	1
ASNA1-201	716	A	2277	0	3	1	0	0	.	2281	0.998246	1
ASNA1-201	717	C	1	9	2144	0	0	0	.	2154	0.995357	1
ASNA1-201	718	A	2221	0	3	0	0	0	.	2224	0.998651	1
ASNA1-201	719	G	3	2392	5	4	0	0	.	2404	0.995008	1
ASNA1-201	720	T	1	5	3	2277	0	0	.	2286	0.996063	1
ASNA1-201	721	T	1	5	2	2445	0	0	.	2453	0.996739	1
ASNA1-201	722	C	1	2	2542	2	0	0	.	2547	0.998037	1
ASNA1-201	723	A	2554	0	2	0	0	0	.	2556	0.999218	1
ASNA1-201	724	A	2471	0	5	0	0	0	.	2476	0.997981	1
ASNA1-201	725	G	0	2390	1	7	0	0	.	2398	0.996664	1
ASNA1-201	726	G	1	2522	0	1	0	0	.	2524	0.999208	1
ASNA1-201	727	A	2380	1	3	0	0	0	.	2384	0.998322	1
ASNA1-201	728	C	2	0	2449	1	0	0	.	2452	0.998777	1
ASNA1-201	729	C	4	1	2424	0	0	0	.	2429	0.997942	1
ASNA1-201	730	C	2	0	2444	6	0	0	.	2452	0.996737	1
ASNA1-201	731	T	0	1	2	2407	0	0	.	2410	0.998755	1
ASNA1-201	732	G	0	2535	0	3	0	0	.	2538	0.998818	1
ASNA1-201	733	A	2557	0	6	0	0	0	.	2563	0.997659	1
ASNA1-201	734	G	1	2610	1	3	0	0	.	2615	0.998088	1
ASNA1-201	735	C	1	0	2533	0	0	0	.	2534	0.999605	1
ASNA1-201	736	A	2574	4	0	1	0	0	.	2579	0.998061	1
ASNA1-201	737	G	3	2601	0	2	0	0	.	2606	0.998081	1
ASNA1-201	738	A	2562	2	6	0	0	0	.	2570	0.996887	1
ASNA1-201	739	C	1	0	2587	0	0	0	.	2588	0.999614	1
ASNA1-201	740	A	2597	0	1	0	0	0	.	2598	0.999615	1
ASNA1-201	741	A	2645	1	2	0	0	0	.	2648	0.998867	1
ASNA1-201	742	C	1	0	2700	0	0	0	.	2701	0.99963	1
ASNA1-201	743	T	0	0	6	2598	0	0	.	2604	0.997696	1
ASNA1-201	744	T	1	0	5	2597	0	0	.	2603	0.997695	1
ASNA1-201	745	T	1	1	3	2750	0	0	.	2755	0.998185	1
ASNA1-201	746	C	1	0	2786	1	0	0	.	2788	0.999283	1
ASNA1-201	747	A	2662	1	1	1	0	0	.	2665	0.998874	1
ASNA1-201	748	T	0	2	2	2751	0	0	.	2755	0.998548	1
ASNA1-201	749	C	4	1	2573	0	0	0	.	2578	0.998061	1
ASNA1-201	750	T	0	0	2	2479	0	0	.	2481	0.999194	1
ASNA1-201	751	G	0	2736	0	3	0	0	.	2739	0.998905	1
ASNA1-201	752	C	2	0	2742	3	0	0	.	2747	0.99818	1
ASNA1-201	753	G	3	2842	1	4	0	0	.	2850	0.997193	1
ASNA1-201	754	T	0	4	3	2793	0	0	.	2800	0.9975	1
ASNA1-201	755	A	2885	0	2	0	0	0	.	2887	0.999307	1
ASNA1-201	756	T	1	5	1	2823	0	0	.	2830	0.997527	1
ASNA1-201	757	G	1	2896	3	3	0	0	.	2903	0.997589	1
ASNA1-201	758	C	0	0	2869	5	0	0	.	2874	0.99826	1
ASNA1-201	759	A	2826	0	2	2	0	0	.	2830	0.998587	1
ASNA1-201	760	T	0	1	6	2751	0	0	.	2758	0.997462	1
ASNA1-201	761	T	0	2	1	2829	0	0	.	2832	0.998941	1
ASNA1-201	762	G	1	2869	0	5	0	0	.	2875	0.997913	1
ASNA1-201	763	C	2	3	2796	9	0	0	.	2810	0.995018	1
ASNA1-201	764	T	0	8	4	2721	0	0	.	2733	0.995609	1
ASNA1-201	765	G	1	2857	0	2	0	0	.	2860	0.998951	1
ASNA1-201	766	A	3216	4	1	1	0	0	.	3222	0.998138	1
ASNA1-201	767	G	1	3274	0	6	0	0	.	3281	0.997867	1
ASNA1-201	768	T	2	6	6	2933	0	0	.	2947	0.995249	1
ASNA1-201	769	T	1	4	0	3275	0	0	.	3280	0.998476	1
ASNA1-201	770	C	3	1	3425	0	0	0	.	3429	0.998833	1
ASNA1-201	771	C	1	0	3405	1	0	0	.	3407	0.999413	1
ASNA1-201	772	T	4	2	0	3214	0	0	.	3220	0.998137	1
ASNA1-201	773	G	1	3298	0	8	1	0	.	3308	0.996977	1
ASNA1-201	774	T	2	14	2	3027	0	0	.	3045	0.994089	1
ASNA1-201	775	C	4	0	3428	5	0	0	.	3437	0.997381	1
ASNA1-201	776	C	3	0	3217	11	0	0	.	3231	0.995667	1
ASNA1-201	777	C	2	0	3328	9	0	0	.	3339	0.996706	1
ASNA1-201	778	T	1	6	4	3225	0	0	.	3236	0.996601	1
ASNA1-201	779	G	14	3550	1	1	1	0	.	3567	0.995234	1
ASNA1-201	780	T	1	3	3	3440	0	0	.	3447	0.997969	1
ASNA1-201	781	A	3327	1	2	1	0	0	.	3331	0.998799	1
ASNA1-201	782	T	0	4	10	3339	0	0	.	3353	0.995825	1
ASNA1-201	783	G	1	3367	0	3	0	0	.	3371	0.998813	1
ASNA1-201	784	A	3360	1	3	0	0	0	.	3364	0.998811	1
ASNA1-201	785	G	0	3270	3	4	0	0	.	3277	0.997864	1
ASNA1-201	786	A	3205	0	9	0	0	0	.	3214	0.9972	1
ASNA1-201	787	C	3	0	2984	0	0	0	.	2987	0.998996	1
ASNA1-201	788	A	2988	0	1	0	0	0	.	2989	0.999665	1
ASNA1-201	789	G	1	3001	2	6	0	0	.	3010	0.99701	1
ASNA1-201	790	A	3126	0	6	0	0	0	.	3132	0.998084	1
ASNA1-201	791	G	8	3110	0	2	0	0	.	3120	0.996795	1
ASNA1-201	792	A	2913	0	6	0	0	0	.	2919	0.997945	1
ASNA1-201	793	G	4	2956	1	3	0	0	.	2964	0.997301	1
ASNA1-201	794	G	5	2806	1	6	0	0	.	2818	0.995742	1
ASNA1-201	795	C	2	0	2762	0	0	0	.	2764	0.999276	1
ASNA1-201	796	T	4	8	6	2603	0	0	.	2621	0.993132	1
ASNA1-201	797	G	0	2771	1	6	0	0	.	2778	0.99748	1
ASNA1-201	798	A	2821	2	4	0	0	0	.	2827	0.997878	1
ASNA1-201	799	T	1	5	1	2759	0	0	.	2766	0.997469	1
ASNA1-201	800	C	1	6	2892	3	0	0	.	2902	0.996554	1
ASNA1-201	801	C	5	1	2769	3	0	0	.	2778	0.99676	1
ASNA1-201	802	A	2797	1	3	2	0	0	.	2803	0.997859	1
ASNA1-201	803	G	0	2788	1	2	0	0	.	2791	0.998925	1
ASNA1-201	804	G	0	2748	0	3	0	0	.	2751	0.998909	1
ASNA1-201	805	A	2777	0	2	0	0	0	.	2779	0.99928	1
ASNA1-201	806	G	3	2735	0	5	0	0	.	2743	0.997083	1
ASNA1-201	807	C	2	0	2719	0	0	0	.	2721	0.999265	1
ASNA1-201	808	T	0	3	4	2564	0	0	.	2571	0.997277	1
ASNA1-201	809	G	0	2727	0	4	0	0	.	2731	0.998535	1
ASNA1-201	810	G	2	2788	1	3	0	0	.	2794	0.997853	1
ASNA1-201	811	C	2	0	2807	1	0	0	.	2810	0.998932	1
ASNA1-201	812	C	3	0	2796	0	0	0	.	2799	0.998928	1
ASNA1-201	813	A	2801	0	0	1	0	0	.	2802	0.999643	1
ASNA1-201	814	A	2829	2	1	1	0	0	.	2833	0.998588	1
ASNA1-201	815	G	0	2854	1	3	0	0	.	2858	0.9986	1
ASNA1-201	816	T	0	4	8	2613	0	0	.	2625	0.995429	1
ASNA1-201	817	G	0	2809	1	2	0	0	.	2812	0.998933	1
ASNA1-201	818	C	4	0	2770	0	0	0	.	2774	0.998558	1
ASNA1-201	819	A	2821	6	1	0	0	0	.	2828	0.997525	1
ASNA1-201	820	A	2880	0	0	1	0	0	.	2881	0.999653	1
ASNA1-201	821	G	3	2877	1	2	0	0	.	2883	0.997919	1
ASNA1-201	822	A	2878	2	1	0	0	0	.	2881	0.998959	1
ASNA1-201	823	T	0	0	2	2683	0	0	.	2685	0.999255	1
ASNA1-201	824	T	0	0	2	2668	0	0	.	2670	0.999251	1
ASNA1-201	825	G	3	2663	2	2	0	0	.	2670	0.997378	1
ASNA1-201	826	A	2549	1	10	0	2	0	.	2562	0.994926	1
ASNA1-201	827	C	2	0	2651	0	2	0	.	2655	0.998493	1
ASNA1-201	828	A	2531	0	2	0	0	0	.	2533	0.99921	1
ASNA1-201	829	C	4	0	2624	0	0	0	.	2628	0.998478	1
ASNA1-201	830	A	2585	0	4	0	0	0	.	2589	0.998455	1
ASNA1-201	831	C	2	0	2615	0	0	0	.	2617	0.999236	1
ASNA1-201	832	A	2629	1	3	0	0	0	.	2633	0.998481	1
ASNA1-201	833	C	4	0	2746	0	0	0	.	2750	0.998545	1
ASNA1-201	834	A	2760	1	0	1	0	0	.	2762	0.999276	1
ASNA1-201	835	A	2900	1	0	1	0	0	.	2902	0.999311	1
ASNA1-201	836	T	0	1	2	2667	0	0	.	2670	0.998876	1
ASNA1-201	837	A	2841	0	3	0	0	0	.	2844	0.998945	1
ASNA1-201	838	T	0	0	1	2570	0	0	.	2571	0.999611	1
ASNA1-201	839	A	2719	0	1	0	0	0	.	2720	0.999632	1
ASNA1-201	840	A	2776	1	1	2	0	0	.	2780	0.998561	1
ASNA1-201	841	T	0	2	5	2305	0	0	.	2312	0.996972	1
ASNA1-201	842	T	1	0	1	2268	0	0	.	2270	0.999119	1
ASNA1-201	843	G	4	2020	0	0	0	0	.	2024	0.998024	1
ASNA1-201	844	T	0	5	2	1979	0	0	.	1986	0.996475	1
ASNA1-201	845	C	2	0	2052	1	0	0	.	2055	0.99854	1
ASNA1-201	846	A	1960	2	2	0	0	0	.	1964	0.997963	1
ASNA1-201	847	A	1821	0	6	0	0	0	.	1827	0.996716	1
ASNA1-201	848	C	2	0	2048	0	0	0	.	2050	0.999024	1
ASNA1-201	849	C	0	0	1898	0	0	0	.	1898	1	1
ASNA1-201	850	A	1837	1	2	0	0	0	.	1840	0.99837	1
ASNA1-201	851	G	1	2033	2	1	0	0	.	2037	0.998036	1
ASNA1-201	852	C	2	1	2019	1	0	0	.	2023	0.998023	1
ASNA1-201	853	T	0	4	0	1931	0	0	.	1935	0.997933	1
ASNA1-201	854	C	3	0	1891	0	0	0	.	1894	0.998416	1
ASNA1-201	855	G	0	1897	0	4	0	0	.	1901	0.997896	1
ASNA1-201	856	T	1	11	0	1761	0	0	.	1773	0.993232	1
ASNA1-201	857	C	0	0	1880	0	0	0	.	1880	1	1
ASNA1-201	858	T	0	0	2	1807	0	0	.	1809	0.998894	1
ASNA1-201	859	T	1	0	2	1893	0	0	.	1896	0.998418	1
ASNA1-201	860	C	0	0	1903	0	0	0	.	1903	1	1
ASNA1-201	861	C	0	1	1935	1	0	0	.	1937	0.998967	1
ASNA1-201	862	C	1	0	1881	0	0	0	.	1882	0.999469	1
ASNA1-201	863	C	1	1	1860	0	0	0	.	1862	0.998926	1
ASNA1-201	864	G	1	1908	0	3	0	0	.	1912	0.997908	1
ASNA1-201	865	A	1549	0	16	0	0	0	.	1565	0.989776	1
ASNA1-201	866	C	0	0	1957	1	0	0	.	1958	0.999489	1
ASNA1-201	867	C	6	0	1889	0	0	0	.	1895	0.996834	1
ASNA1-201	868	C	2	1	1897	0	0	0	.	1900	0.998421	1
ASNA1-201	869	C	2	0	1919	0	0	0	.	1921	0.998959	1
ASNA1-201	870	G	1	1862	0	4	0	0	.	1867	0.997322	1
ASNA1-201	871	A	1876	1	3	0	0	0	.	1880	0.997872	1
ASNA1-201	872	G	1	1939	1	1	0	0	.	1942	0.998455	1
ASNA1-201	873	A	1782	0	3	0	0	0	.	1785	0.998319	1
ASNA1-201	874	A	1804	0	6	0	0	0	.	1810	0.996685	1
ASNA1-201	875	G	2	2051	1	3	0	0	.	2057	0.997083	1
ASNA1-201	876	C	0	0	2106	0	0	0	.	2106	1	1
ASNA1-201	877	C	0	1	2029	2	0	0	.	2032	0.998524	1
ASNA1-201	878	C	2	1	2050	0	0	0	.	2053	0.998539	1
ASNA1-201	879	T	1	4	0	1998	0	0	.	2003	0.997504	1
ASNA1-201	880	G	3	2071	2	9	0	0	.	2085	0.993285	1
ASNA1-201	881	C	1	0	2112	0	0	1	A	2114	0.999054	1
ASNA1-201	882	A	2119	2	0	0	0	0	.	2121	0.999057	1
ASNA1-201	883	A	2099	1	2	0	0	0	.	2102	0.998573	1
ASNA1-201	884	G	1	2179	1	0	0	0	.	2181	0.999083	1
ASNA1-201	885	A	2105	1	1	0	0	0	.	2107	0.999051	1
ASNA1-201	886	T	0	5	1	2018	0	0	.	2024	0.997036	1
ASNA1-201	887	G	4	2116	0	1	0	0	.	2121	0.997643	1
ASNA1-201	888	T	1	4	4	1952	0	0	.	1961	0.995411	1
ASNA1-201	889	G	2	2078	1	4	0	0	.	2085	0.996643	1
ASNA1-201	890	T	0	6	0	1842	0	0	.	1848	0.996753	1
ASNA1-201	891	G	1	2089	1	4	0	0	.	2095	0.997136	1
ASNA1-201	892	A	1986	1	4	0	0	0	.	1991	0.997489	1
ASNA1-201	893	G	0	1964	0	7	0	0	.	1971	0.996449	1
ASNA1-201	894	G	3	2041	1	5	0	0	.	2050	0.99561	1
ASNA1-201	895	C	3	0	1971	1	1	0	.	1976	0.99747	1
ASNA1-201	896	C	0	0	1899	1	0	0	.	1900	0.999474	1
ASNA1-201	897	C	2	0	1895	0	0	0	.	1897	0.998946	1
ASNA1-201	898	G	2	1985	0	2	0	0	.	1989	0.997989	1
ASNA1-201	899	T	1	10	0	1679	0	0	.	1690	0.993491	1
ASNA1-201	900	C	1	0	2020	0	0	0	.	2021	0.999505	1
ASNA1-201	901	A	1928	3	1	1	0	0	.	1933	0.997413	1
ASNA1-201	902	C	9	1	1966	0	0	0	.	1976	0.994939	1
ASNA1-201	903	A	1829	0	0	0	0	0	.	1829	1	1
ASNA1-201	904	A	1846	0	1	0	0	0	.	1847	0.999459	1
ASNA1-201	905	G	5	1861	4	3	0	0	.	1873	0.993593	1
ASNA1-201	906	A	1876	0	3	0	0	0	.	1879	0.998403	1
ASNA1-201	907	T	0	4	1	1739	0	0	.	1744	0.997133	1
ASNA1-201	908	C	3	0	1862	0	0	0	.	1865	0.998391	1
ASNA1-201	909	C	4	0	1701	0	0	0	.	1705	0.997654	1
ASNA1-201	910	A	1633	1	5	0	0	0	.	1639	0.996339	1
ASNA1-201	911	G	3	1660	0	1	0	0	.	1664	0.997596	1
ASNA1-201	912	G	4	1795	1	2	0	0	.	1802	0.996115	1
ASNA1-201	913	C	4	0	1827	0	0	0	.	1831	0.997815	1
ASNA1-201	914	C	1	0	1787	0	0	0	.	1788	0.999441	1
ASNA1-201	915	A	1830	2	1	0	0	0	.	1833	0.998363	1
ASNA1-201	916	A	1805	3	0	0	0	0	.	1808	0.998341	1
ASNA1-201	917	G	1	1826	5	3	0	0	.	1835	0.995095	1
ASNA1-201	918	T	0	3	0	1811	0	0	.	1814	0.998346	1
ASNA1-201	919	A	1824	0	0	1	0	0	.	1825	0.999452	1
ASNA1-201	920	T	0	5	6	1741	0	0	.	1752	0.993721	1
ASNA1-201	921	C	1	4	1803	1	0	0	.	1809	0.996683	1
ASNA1-201	922	T	0	3	1	1745	0	0	.	1749	0.997713	1
ASNA1-201	923	G	0	1765	0	3	1	0	.	1769	0.997739	1
ASNA1-201	924	G	0	1789	1	3	0	0	.	1793	0.997769	1
ASNA1-201	925	A	1753	1	2	0	0	0	.	1756	0.998292	1
ASNA1-201	926	C	0	3	1731	1	0	0	.	1735	0.997695	1
ASNA1-201	927	C	3	0	1660	1	0	0	.	1664	0.997596	1
ASNA1-201	928	A	1714	3	1	0	0	0	.	1718	0.997672	1
ASNA1-201	929	G	2	1705	1	6	0	0	.	1714	0.994749	1
ASNA1-201	930	A	1783	0	0	0	0	0	.	1783	1	1
ASNA1-201	931	T	0	2	0	1670	0	0	.	1672	0.998804	1
ASNA1-201	932	G	0	1761	1	1	0	0	.	1763	0.998866	1
ASNA1-201	933	G	0	1728	0	3	0	0	.	1731	0.998267	1
ASNA1-201	934	A	1727	0	3	0	0	0	.	1730	0.998266	1
ASNA1-201	935	G	0	1693	1	2	0	0	.	1696	0.998231	1
ASNA1-201	936	G	0	1661	0	3	0	0	.	1664	0.998197	1
ASNA1-201	937	A	1642	1	3	0	0	0	.	1646	0.99757	1
ASNA1-201	938	C	2	0	1716	0	0	0	.	1718	0.998836	1
ASNA1-201	939	C	3	1	1692	0	0	0	.	1696	0.997642	1
ASNA1-201	940	T	0	4	1	1635	0	0	.	1640	0.996951	1
ASNA1-201	941	G	1	1761	0	3	0	0	.	1765	0.997734	1
ASNA1-201	942	T	0	1	0	1697	0	0	.	1698	0.999411	1
ASNA1-201	943	A	1753	0	1	0	0	0	.	1754	0.99943	1
ASNA1-201	944	T	0	1	3	1671	0	0	.	1675	0.997612	1
ASNA1-201	945	G	0	1665	0	6	0	0	.	1671	0.996409	1
ASNA1-201	946	A	1645	0	2	0	0	0	.	1647	0.998786	1
ASNA1-201	947	A	1593	0	3	0	0	0	.	1596	0.99812	1
ASNA1-201	948	G	0	1569	2	3	0	0	.	1574	0.996823	1
ASNA1-201	949	A	1401	1	3	0	0	0	.	1405	0.997153	1
ASNA1-201	950	C	4	0	1369	0	0	0	.	1373	0.997087	1
ASNA1-201	951	T	1	0	2	1197	0	0	.	1200	0.9975	1
ASNA1-201	952	T	0	0	0	1284	0	0	.	1284	1	1
ASNA1-201	953	C	1	2	1386	2	0	0	.	1391	0.996405	1
ASNA1-201	954	C	2	1	1349	1	0	0	.	1353	0.997044	1
ASNA1-201	955	A	1312	0	3	0	0	0	.	1315	0.997719	1
ASNA1-201	956	C	0	0	1299	0	0	0	.	1299	1	1
ASNA1-201	957	A	1293	1	2	0	0	0	.	1296	0.997685	1
ASNA1-201	958	T	0	1	0	1181	0	0	.	1182	0.999154	1
ASNA1-201	959	C	0	0	1295	0	0	0	.	1295	1	1
ASNA1-201	960	G	2	1222	0	3	0	0	.	1227	0.995925	1
ASNA1-201	961	T	0	4	1	1122	0	1	C	1128	0.994681	1
ASNA1-201	962	G	3	1248	7	6	0	0	.	1264	0.987342	1
ASNA1-201	963	A	1290	0	2	0	0	0	.	1292	0.998452	1
ASNA1-201	964	A	1262	0	0	0	0	0	.	1262	1	1
ASNA1-201	965	G	7	1276	3	3	0	0	.	1289	0.989915	1
ASNA1-201	966	C	1	0	1325	0	0	0	.	1326	0.999246	1
ASNA1-201	967	T	0	2	1	1132	0	0	.	1135	0.997357	1
ASNA1-201	968	G	3	1290	1	0	0	0	.	1294	0.996909	1
ASNA1-201	969	C	0	1	1331	1	0	0	.	1333	0.9985	1
ASNA1-201	970	C	1	1	1374	0	0	0	.	1376	0.998547	1
ASNA1-201	971	G	3	1338	0	3	0	0	.	1344	0.995536	1
ASNA1-201	972	C	2	0	1380	2	0	0	.	1384	0.99711	1
ASNA1-201	973	T	0	9	4	1243	0	0	.	1256	0.98965	1
ASNA1-201	974	G	1	1404	0	1	0	0	.	1406	0.998578	1
ASNA1-201	975	T	1	4	0	1267	0	0	.	1272	0.996069	1
ASNA1-201	976	T	0	1	4	1278	0	0	.	1283	0.996103	1
ASNA1-201	977	A	1379	2	1	0	0	0	.	1382	0.997829	1
ASNA1-201	978	C	1	0	1409	2	0	0	.	1412	0.997875	1
ASNA1-201	979	C	3	0	1416	4	0	0	.	1423	0.995081	1
ASNA1-201	980	C	2	2	1288	0	0	0	.	1292	0.996904	1
ASNA1-201	981	C	2	0	1272	0	0	0	.	1274	0.99843	1
ASNA1-201	982	A	1176	1	4	0	0	0	.	1181	0.995766	1
ASNA1-201	983	T	1	4	3	1178	0	0	.	1186	0.993255	1
ASNA1-201	984	G	0	1207	0	3	0	0	.	1210	0.997521	1
ASNA1-201	985	A	1164	1	5	0	0	0	.	1170	0.994872	1
ASNA1-201	986	G	0	1167	0	3	0	0	.	1170	0.997436	1
ASNA1-201	987	G	0	1156	1	1	0	0	.	1158	0.998273	1
ASNA1-201	988	T	0	10	2	868	0	0	.	880	0.986364	1
ASNA1-201	989	G	0	1246	0	1	1	0	.	1248	0.998397	1
ASNA1-201	990	C	1	8	1214	1	0	0	.	1224	0.99183	1
ASNA1-201	991	G	0	1238	1	2	10	0	.	1251	0.989608	1
ASNA1-201	992	G	0	1264	0	3	0	0	.	1267	0.997632	1
ASNA1-201	993	G	0	1246	1	0	0	0	.	1247	0.999198	1
ASNA1-201	994	G	3	1218	0	2	0	0	.	1223	0.995912	1
ASNA1-201	995	G	0	1211	1	1	0	0	.	1213	0.998351	1
ASNA1-201	996	G	3	1196	1	1	0	0	.	1201	0.995837	1
ASNA1-201	997	C	0	0	1224	1	0	0	.	1225	0.999184	1
ASNA1-201	998	A	1218	1	1	0	0	0	.	1220	0.998361	1
ASNA1-201	999	G	0	1259	0	1	0	0	.	1260	0.999206	1
ASNA1-201	1000	A	1281	0	1	0	0	0	.	1282	0.99922	1
ASNA1-201	1001	C	1	3	1243	1	0	0	.	1248	0.995994	1
ASNA1-201	1002	A	1191	0	0	0	0	0	.	1191	1	1
ASNA1-201	1003	A	1165	1	0	0	0	0	.	1166	0.999142	1
ASNA1-201	1004	G	0	1076	0	1	0	0	.	1077	0.999071	1
ASNA1-201	1005	G	0	1127	0	1	0	0	.	1128	0.999113	1
ASNA1-201	1006	T	0	16	2	927	0	0	.	945	0.980952	1
ASNA1-201	1007	C	0	0	1177	2	0	0	.	1179	0.998304	1
ASNA1-201	1008	A	1184	1	0	0	0	0	.	1185	0.999156	1
ASNA1-201	1009	A	1196	0	0	0	0	0	.	1196	1	1
ASNA1-201	1010	C	0	1	1167	3	0	0	.	1171	0.996584	1
ASNA1-201	1011	A	1144	3	2	1	0	0	.	1150	0.994783	1
ASNA1-201	1012	C	0	0	1094	0	0	0	.	1094	1	1
ASNA1-201	1013	C	0	1	1017	0	0	0	.	1018	0.999018	1
ASNA1-201	1014	T	0	1	0	1020	0	0	.	1021	0.999021	1
ASNA1-201	1015	T	0	2	1	1008	0	0	.	1011	0.997033	1
ASNA1-201	1016	C	0	0	1017	0	0	0	.	1017	1	1
ASNA1-201	1017	T	0	2	3	989	0	0	.	994	0.99497	1
ASNA1-201	1018	C	1	0	1014	2	0	0	.	1017	0.99705	1
ASNA1-201	1019	G	0	1023	0	2	0	0	.	1025	0.998049	1
ASNA1-201	1020	G	0	1016	0	0	0	0	.	1016	1	1
ASNA1-201	1021	C	0	0	1057	0	0	0	.	1057	1	1
ASNA1-201	1022	C	0	0	1046	0	0	0	.	1046	1	1
ASNA1-201	1023	C	0	0	1029	0	0	0	.	1029	1	1
ASNA1-201	1024	T	0	7	2	956	0	0	.	965	0.990674	1
ASNA1-201	1025	C	0	0	1041	0	0	0	.	1041	1	1
ASNA1-201	1026	C	1	0	1057	0	0	0	.	1058	0.999055	1
ASNA1-201	1027	T	0	4	0	978	0	0	.	982	0.995927	1
ASNA1-201	1028	C	0	0	1049	0	0	0	.	1049	1	1
ASNA1-201	1029	C	0	0	1031	0	0	0	.	1031	1	1
ASNA1-201	1030	T	1	1	0	975	0	0	.	977	0.997953	1
ASNA1-201	1031	G	0	1037	1	4	0	0	.	1042	0.995202	1
ASNA1-201	1032	G	0	1025	1	1	0	0	.	1027	0.998053	1
ASNA1-201	1033	A	1038	2	1	0	0	0	.	1041	0.997118	1
ASNA1-201	1034	G	0	1047	1	5	0	0	.	1053	0.994302	1
ASNA1-201	1035	C	0	0	1016	0	0	0	.	1016	1	1
ASNA1-201	1036	C	1	0	985	2	0	0	.	988	0.996964	1
ASNA1-201	1037	C	2	0	963	2	0	0	.	967	0.995863	1
ASNA1-201	1038	T	0	0	1	966	0	0	.	967	0.998966	1
ASNA1-201	1039	A	1001	0	0	0	0	0	.	1001	1	1
ASNA1-201	1040	C	1	0	969	0	0	0	.	970	0.998969	1
ASNA1-201	1041	A	952	0	1	0	0	0	.	953	0.998951	1
ASNA1-201	1042	A	903	0	0	0	0	0	.	903	1	1
ASNA1-201	1043	G	1	882	2	2	0	0	.	887	0.994363	1
ASNA1-201	1044	C	0	0	947	0	0	0	.	947	1	1
ASNA1-201	1045	C	0	0	840	0	0	0	.	840	1	1
ASNA1-201	1046	C	0	0	855	0	0	0	.	855	1	1
ASNA1-201	1047	C	1	0	850	1	0	0	.	852	0.997653	1
ASNA1-201	1048	C	0	0	843	0	0	0	.	843	1	1
ASNA1-201	1049	C	0	0	829	0	0	0	.	829	1	1
ASNA1-201	1050	A	852	1	0	0	0	0	.	853	0.998828	1
ASNA1-201	1051	G	3	816	0	1	0	0	.	820	0.995122	1
ASNA1-201	1052	T	0	4	3	693	0	0	.	700	0.99	1
ASNA1-201	1053	G	0	819	0	0	0	0	.	819	1	1
ASNA1-201	1054	C	2	0	764	0	0	0	.	766	0.997389	1
ASNA1-201	1055	C	0	0	765	0	0	0	.	765	1	1
ASNA1-201	1056	C	0	0	707	0	0	0	.	707	1	1
ASNA1-201	1057	A	741	1	2	0	0	0	.	744	0.995968	1
ASNA1-201	1058	G	0	729	0	2	0	0	.	731	0.997264	1
ASNA1-201	1059	T	0	0	1	655	0	0	.	656	0.998476	1
ASNA1-201	1060	A	680	0	1	0	0	0	.	681	0.998532	1
ASNA1-201	1061	G	0	605	0	2	0	0	.	607	0.996705	1
ASNA1-201	1062	C	0	0	617	1	0	0	.	618	0.998382	1
ASNA1-201	1063	A	616	0	3	0	0	0	.	619	0.995153	1
ASNA1-201	1064	C	1	0	541	0	0	0	.	542	0.998155	1
ASNA1-201	1065	A	557	0	0	0	0	0	.	557	1	1
ASNA1-201	86	G	1	2	0	0	0	0	.	3	0.666667	0
ASNA1-201	87	G	0	38	0	0	0	0	.	38	1	0
ASNA1-201	88	A	454	1	5	0	0	0	.	460	0.986957	0
ASNA1-201	1066	G	0	485	0	0	0	0	.	485	1	0
ASNA1-201	1067	C	0	0	489	0	0	0	.	489	1	0
ASNA1-201	1068	T	0	1	1	444	0	0	.	446	0.995516	0
ASNA1-201	1069	G	1	459	0	0	0	0	.	460	0.997826	0
ASNA1-201	1070	C	0	0	461	0	0	0	.	461	1	0
ASNA1-201	1071	C	0	0	442	0	0	0	.	442	1	0
ASNA1-201	1072	A	436	0	0	0	0	0	.	436	1	0
ASNA1-201	1073	G	0	433	0	1	0	0	.	434	0.997696	0
ASNA1-201	1074	C	0	0	422	0	0	0	.	422	1	0
ASNA1-201	1075	C	0	0	408	0	0	0	.	408	1	0
ASNA1-201	1076	C	4	0	398	1	0	0	.	403	0.987593	0
ASNA1-201	1077	C	2	0	394	0	0	0	.	396	0.994949	0
ASNA1-201	1078	A	387	0	1	0	0	0	.	388	0.997423	0
ASNA1-201	1079	A	375	0	1	0	0	0	.	376	0.99734	0
ASNA1-201	1080	C	0	0	379	0	0	0	.	379	1	0
ASNA1-201	1081	C	0	0	361	0	0	0	.	361	1	0
ASNA1-201	1082	G	0	347	0	2	0	0	.	349	0.994269	0
ASNA1-201	1083	C	0	0	344	1	0	0	.	345	0.997101	0
ASNA1-201	1084	T	0	1	0	312	0	0	.	313	0.996805	0
ASNA1-201	1085	G	0	332	0	0	0	0	.	332	1	0
ASNA1-201	1086	C	0	0	340	0	0	0	.	340	1	0
ASNA1-201	1087	C	0	0	333	1	0	0	.	334	0.997006	0
ASNA1-201	1088	A	330	0	1	0	0	0	.	331	0.996979	0
ASNA1-201	1089	T	0	0	3	303	0	0	.	306	0.990196	0
ASNA1-201	1090	T	0	0	1	290	0	0	.	291	0.996564	0
ASNA1-201	1091	T	0	0	1	301	0	0	.	302	0.996689	0
ASNA1-201	1092	C	0	0	311	0	0	0	.	311	1	0
ASNA1-201	1093	A	308	0	0	0	0	0	.	308	1	0
ASNA1-201	1094	C	0	0	271	0	0	0	.	271	1	0
ASNA1-201	1095	A	263	0	0	0	0	0	.	263	1	0
ASNA1-201	1096	C	0	0	215	0	0	0	.	215	1	0
ASNA1-201	1097	T	0	0	0	186	0	0	.	186	1	0
ASNA1-201	1098	C	0	0	193	0	0	0	.	193	1	0
ASNA1-201	1099	A	179	0	0	1	0	0	.	180	0.994444	0
ASNA1-201	1100	C	0	1	188	0	0	0	.	189	0.994709	0
ASNA1-201	1101	C	0	0	181	1	0	0	.	182	0.994505	0
ASNA1-201	1102	C	0	0	167	0	0	0	.	167	1	0
ASNA1-201	1103	T	0	0	0	151	0	0	.	151	1	0
ASNA1-201	1104	C	0	0	131	0	0	0	.	131	1	0
ASNA1-201	1105	C	0	0	130	0	0	0	.	130	1	0
ASNA1-201	1106	A	112	0	2	0	0	0	.	114	0.982456	0
ASNA1-201	1107	C	0	0	94	0	0	0	.	94	1	0
ASNA1-201	1108	C	0	0	44	0	0	0	.	44	1	0
ASNA1-201	1109	C	1	2	30	0	0	0	.	33	0.909091	0
ASNA1-201	1110	T	0	0	0	19	0	0	.	19	1	0
ASNA1-201	1111	C	0	0	34	0	0	0	.	34	1	0
ASNA1-201	1112	C	1	0	26	0	0	0	.	27	0.962963	0
ASNA1-201	1113	C	0	0	22	0	0	0	.	22	1	0
ASNA1-201	1114	C	0	0	22	0	0	0	.	22	1	0
ASNA1-201	1115	A	19	0	0	0	0	0	.	19	1	0
ASNA1-201	1116	C	0	0	21	0	0	0	.	21	1	0
ASNA1-201	1117	C	0	0	19	0	0	0	.	19	1	0
ASNA1-201	1118	C	0	0	19	0	0	0	.	19	1	0
ASNA1-201	1119	C	0	0	21	0	0	0	.	21	1	0
ASNA1-201	1120	C	0	0	22	0	0	0	.	22	1	0
ASNA1-201	1121	T	0	0	0	20	0	0	.	20	1	0
ASNA1-201	1122	C	0	0	23	0	0	0	.	23	1	0
ASNA1-201	1123	G	0	17	0	0	0	0	.	17	1	0
ASNA1-201	1124	G	0	24	0	0	0	0	.	24	1	0
ASNA1-201	1125	G	0	25	0	0	0	0	.	25	1	0
ASNA1-201	1126	G	0	29	0	0	0	0	.	29	1	0
ASNA1-201	1127	C	0	0	29	0	0	0	.	29	1	0
ASNA1-201	1128	A	30	0	0	0	0	0	.	30	1	0
ASNA1-201	1129	G	0	33	0	0	0	0	.	33	1	0
ASNA1-201	1130	A	36	0	0	0	0	0	.	36	1	0
ASNA1-201	1131	G	1	36	0	0	0	0	.	37	0.972973	0
ASNA1-201	1132	T	0	0	0	31	0	0	.	31	1	0
ASNA1-201	1133	T	0	0	0	35	0	0	.	35	1	0
ASNA1-201	1134	T	0	0	0	34	0	0	.	34	1	0
ASNA1-201	1135	G	0	35	0	0	0	0	.	35	1	0
ASNA1-201	1136	C	0	0	36	0	0	0	.	36	1	0
ASNA1-201	1137	A	36	0	0	0	0	0	.	36	1	0
ASNA1-201	1138	C	0	0	35	0	0	0	.	35	1	0
ASNA1-201	1139	A	37	0	0	0	0	0	.	37	1	0
ASNA1-201	1140	A	35	0	0	0	0	0	.	35	1	0
ASNA1-201	1141	A	32	0	0	0	0	0	.	32	1	0
ASNA1-201	1142	G	0	33	0	0	0	0	.	33	1	0
ASNA1-201	1143	T	0	0	0	29	0	0	.	29	1	0
ASNA1-201	1144	C	0	0	34	0	0	0	.	34	1	0
ASNA1-201	1145	C	0	0	32	0	0	0	.	32	1	0
ASNA1-201	1146	C	0	0	33	0	0	0	.	33	1	0
ASNA1-201	1147	C	0	0	36	0	0	0	.	36	1	0
ASNA1-201	1148	C	1	0	33	0	0	0	.	34	0.970588	0
ASNA1-201	1149	C	0	0	40	0	0	0	.	40	1	0
ASNA1-201	1150	C	0	0	41	0	0	0	.	41	1	0
ASNA1-201	1151	A	42	0	0	0	0	0	.	42	1	0
ASNA1-201	1152	T	0	0	0	40	0	0	.	40	1	0
ASNA1-201	1153	A	45	0	0	0	0	0	.	45	1	0
ASNA1-201	1154	A	44	0	0	0	0	0	.	44	1	0
ASNA1-201	1155	T	0	0	0	37	0	0	.	37	1	0
ASNA1-201	1156	A	40	0	0	0	0	0	.	40	1	0
ASNA1-201	1157	C	0	0	44	0	0	0	.	44	1	0
ASNA1-201	1158	A	42	0	1	0	0	0	.	43	0.976744	0
ASNA1-201	1159	G	0	37	0	0	0	0	.	37	1	0
ASNA1-201	1160	G	0	42	0	0	0	0	.	42	1	0
ASNA1-201	1161	G	0	40	0	0	0	0	.	40	1	0
ASNA1-201	1162	G	0	47	0	0	0	0	.	47	1	0
ASNA1-201	1163	G	0	38	0	0	0	0	.	38	1	0
ASNA1-201	1164	A	38	0	0	0	0	0	.	38	1	0
ASNA1-201	1165	G	0	39	0	0	0	0	.	39	1	0
ASNA1-201	1166	C	1	0	39	0	0	0	.	40	0.975	0
ASNA1-201	1167	C	0	0	40	0	0	0	.	40	1	0
ASNA1-201	1168	A	35	0	0	0	0	0	.	35	1	0
ASNA1-201	1169	C	0	0	37	0	0	0	.	37	1	0
ASNA1-201	1170	T	0	1	0	35	0	0	.	36	0.972222	0
ASNA1-201	1171	T	0	1	0	34	0	0	.	35	0.971429	0
ASNA1-201	1172	G	0	36	0	0	0	0	.	36	1	0
ASNA1-201	1173	G	0	38	0	0	0	0	.	38	1	0
ASNA1-201	1174	G	0	35	0	0	0	0	.	35	1	0
ASNA1-201	1175	C	0	0	36	0	0	0	.	36	1	0
ASNA1-201	1176	A	38	0	0	0	0	0	.	38	1	0
ASNA1-201	1177	G	0	35	0	0	0	0	.	35	1	0
ASNA1-201	1178	G	0	35	0	0	0	0	.	35	1	0
ASNA1-201	1179	A	34	0	0	0	0	0	.	34	1	0
ASNA1-201	1180	G	0	36	0	0	0	0	.	36	1	0
ASNA1-201	1181	G	0	38	0	0	0	0	.	38	1	0
ASNA1-201	1182	C	0	0	36	0	0	0	.	36	1	0
ASNA1-201	1183	A	35	0	0	0	0	0	.	35	1	0
ASNA1-201	1184	G	0	37	0	0	0	0	.	37	1	0
ASNA1-201	1185	G	0	36	0	0	0	0	.	36	1	0
ASNA1-201	1186	G	0	35	0	0	0	0	.	35	1	0
ASNA1-201	1187	A	31	0	0	0	0	0	.	31	1	0
ASNA1-201	1188	G	0	30	0	0	0	0	.	30	1	0
ASNA1-201	1189	G	0	24	0	0	0	0	.	24	1	0
ASNA1-201	1190	G	0	32	0	0	0	0	.	32	1	0
ASNA1-201	1191	G	0	31	0	0	0	0	.	31	1	0
ASNA1-201	1192	T	1	0	0	26	0	0	.	27	0.962963	0
ASNA1-201	1193	C	0	0	35	0	0	0	.	35	1	0
ASNA1-201	1194	C	0	0	28	0	0	0	.	28	1	0
ASNA1-201	1195	A	30	0	0	0	0	0	.	30	1	0
ASNA1-201	1196	T	0	0	0	31	0	0	.	31	1	0
ASNA1-201	1197	T	0	0	0	31	0	0	.	31	1	0
ASNA1-201	1198	C	0	0	28	0	0	0	.	28	1	0
ASNA1-201	1199	C	0	0	24	0	0	0	.	24	1	0
ASNA1-201	1200	C	0	0	24	0	0	0	.	24	1	0
ASNA1-201	1201	C	0	0	22	0	0	0	.	22	1	0
ASNA1-201	1202	C	0	0	22	0	0	0	.	22	1	0
ASNA1-201	1203	T	0	1	0	20	0	0	.	21	0.952381	0
ASNA1-201	1204	G	0	23	0	0	0	0	.	23	1	0
ASNA1-201	1205	G	0	21	0	0	0	0	.	21	1	0
ASNA1-201	1206	T	0	0	0	17	0	0	.	17	1	0
ASNA1-201	1207	G	0	16	0	0	0	0	.	16	1	0
ASNA1-201	1208	G	0	18	0	0	0	0	.	18	1	0
ASNA1-201	1209	G	0	16	0	0	0	0	.	16	1	0
ASNA1-201	1210	G	0	15	0	0	0	0	.	15	1	0
ASNA1-201	1211	C	0	0	17	0	0	0	.	17	1	0
ASNA1-201	1212	T	0	0	0	14	0	0	.	14	1	0
ASNA1-201	1213	G	0	16	0	0	0	0	.	16	1	0
ASNA1-201	1214	G	0	14	0	0	0	0	.	14	1	0
ASNA1-201	1215	T	0	0	0	16	0	0	.	16	1	0
ASNA1-201	1216	G	0	15	0	0	0	0	.	15	1	0
ASNA1-201	1217	G	0	12	0	0	0	0	.	12	1	0
ASNA1-201	1218	G	0	13	0	0	0	0	.	13	1	0
ASNA1-201	1219	G	0	11	0	0	0	0	.	11	1	0
ASNA1-201	1220	A	14	0	0	0	0	0	.	14	1	0
ASNA1-201	1221	G	0	12	0	0	0	0	.	12	1	0
ASNA1-201	1222	C	0	0	10	0	0	0	.	10	1	0
ASNA1-201	1223	T	0	0	0	11	0	0	.	11	1	0
ASNA1-201	1224	G	0	10	0	0	0	0	.	10	1	0
ASNA1-201	1225	T	0	0	0	10	0	0	.	10	1	0
ASNA1-201	1226	A	10	0	0	0	0	0	.	10	1	0
ASNA1-201	1227	G	0	5	0	0	0	0	.	5	1	0
ASNA1-201	1228	T	0	0	0	4	0	0	.	4	1	0
ASNA1-201	1229	T	0	1	0	2	0	0	.	3	0.666667	0
ASNA1-201	1230	G	0	2	0	0	0	0	.	2	1	0
ASNA1-201	1231	C	0	0	2	0	0	0	.	2	1	0
ASNA1-201	1234	C	0	0	1	0	0	0	.	1	1	0
ASNA1-201	1235	C	0	0	1	0	0	0	.	1	1	0
ASNA1-201	1236	T	0	0	1	0	0	0	.	1	0	0

## Sheet: Replicate 1
CHR	bp	REF	A	G	C	T	del	ins	inserted	Depth	%_REF	Depth>500?
ASNA1-201	88	A	647	0	1	0	0	0	.	648	0.998457	1
ASNA1-201	89	G	0	808	0	0	0	0	.	808	1	1
ASNA1-201	90	C	0	0	867	1	0	0	.	868	0.998848	1
ASNA1-201	91	C	0	0	880	1	0	0	.	881	0.998865	1
ASNA1-201	92	T	0	0	0	870	1	0	.	871	0.998852	1
ASNA1-201	93	A	1017	0	1	0	0	0	.	1018	0.999018	1
ASNA1-201	94	C	0	0	1167	0	0	0	.	1167	1	1
ASNA1-201	95	A	1111	0	1	0	0	0	.	1112	0.999101	1
ASNA1-201	96	C	0	0	1294	0	0	0	.	1294	1	1
ASNA1-201	97	T	0	0	0	1277	0	0	.	1277	1	1
ASNA1-201	98	T	0	0	2	1469	0	0	.	1471	0.99864	1
ASNA1-201	99	A	1457	0	0	0	0	0	.	1457	1	1
ASNA1-201	100	G	6	1435	15	1	0	0	.	1457	0.9849	1
ASNA1-201	101	C	0	0	1516	1	0	0	.	1517	0.999341	1
ASNA1-201	102	A	1454	0	1	0	0	0	.	1455	0.999313	1
ASNA1-201	103	A	1476	0	2	0	0	0	.	1478	0.998647	1
ASNA1-201	104	C	0	0	1591	3	0	0	.	1594	0.998118	1
ASNA1-201	105	A	1538	1	4	0	0	0	.	1543	0.99676	1
ASNA1-201	106	T	0	1	2	1857	0	0	.	1860	0.998387	1
ASNA1-201	107	C	4	0	1889	1	0	0	.	1894	0.99736	1
ASNA1-201	108	A	1869	2	2	1	0	0	.	1874	0.997332	1
ASNA1-201	109	T	0	1	0	1918	0	0	.	1919	0.999479	1
ASNA1-201	110	C	4	1	1940	0	0	0	.	1945	0.997429	1
ASNA1-201	111	G	7	1958	0	0	0	0	.	1965	0.996438	1
ASNA1-201	112	A	1764	0	8	0	0	0	.	1772	0.995485	1
ASNA1-201	113	G	6	1965	4	1	0	0	.	1976	0.994433	1
ASNA1-201	114	C	0	0	2000	2	0	0	.	2002	0.999001	1
ASNA1-201	115	A	1890	1	5	0	0	0	.	1896	0.996835	1
ASNA1-201	116	G	4	2092	0	1	0	0	.	2097	0.997616	1
ASNA1-201	117	C	1	1	2088	2	0	0	.	2092	0.998088	1
ASNA1-201	118	G	3	2053	0	2	0	0	.	2058	0.99757	1
ASNA1-201	119	C	2	0	2113	0	0	0	.	2115	0.999054	1
ASNA1-201	120	A	1974	1	7	0	0	0	.	1982	0.995964	1
ASNA1-201	121	G	1	2296	0	0	0	0	.	2297	0.999565	1
ASNA1-201	122	C	1	1	2315	2	0	0	.	2319	0.998275	1
ASNA1-201	123	C	3	0	2294	1	0	0	.	2298	0.998259	1
ASNA1-201	124	T	0	2	4	2296	0	0	.	2302	0.997394	1
ASNA1-201	125	G	6	2340	0	0	0	0	.	2346	0.997442	1
ASNA1-201	126	A	2367	2	1	0	0	0	.	2370	0.998734	1
ASNA1-201	127	A	2197	2	0	1	0	0	.	2200	0.998636	1
ASNA1-201	128	G	0	2400	0	3	0	0	.	2403	0.998752	1
ASNA1-201	129	T	0	1	1	2364	0	0	.	2366	0.999155	1
ASNA1-201	130	G	0	2394	0	0	0	0	.	2394	1	1
ASNA1-201	131	G	0	2438	0	0	0	0	.	2438	1	1
ASNA1-201	132	A	2351	2	3	0	0	0	.	2356	0.997878	1
ASNA1-201	133	T	0	2	2	2443	0	0	.	2447	0.998365	1
ASNA1-201	134	C	2	0	2396	6	0	0	.	2404	0.996672	1
ASNA1-201	135	T	0	2	4	2367	0	0	.	2373	0.997472	1
ASNA1-201	136	T	0	2	0	2438	0	0	.	2440	0.99918	1
ASNA1-201	137	C	2	0	2497	2	0	0	.	2501	0.998401	1
ASNA1-201	138	G	1	2434	0	2	0	0	.	2437	0.998769	1
ASNA1-201	139	T	1	2	1	2342	0	0	.	2346	0.998295	1
ASNA1-201	140	C	3	5	2476	0	0	0	.	2484	0.996779	1
ASNA1-201	141	G	1	2432	2	1	5	0	.	2441	0.996313	1
ASNA1-201	142	G	0	2438	0	0	0	0	.	2438	1	1
ASNA1-201	143	G	0	2497	0	1	0	0	.	2498	0.9996	1
ASNA1-201	144	G	0	2600	1	2	0	0	.	2603	0.998847	1
ASNA1-201	145	G	4	2642	0	0	0	0	.	2646	0.998488	1
ASNA1-201	146	C	4	0	2618	1	0	0	.	2623	0.998094	1
ASNA1-201	147	A	2525	0	1	0	1	0	.	2527	0.999209	1
ASNA1-201	148	A	2636	1	1	0	0	0	.	2638	0.999242	1
ASNA1-201	149	G	4	2749	0	0	0	0	.	2753	0.998547	1
ASNA1-201	150	G	1	2755	1	2	0	0	.	2759	0.99855	1
ASNA1-201	151	G	1	2767	1	1	0	0	.	2770	0.998917	1
ASNA1-201	152	T	1	3	1	2683	0	0	.	2688	0.99814	1
ASNA1-201	153	G	1	2772	1	3	0	0	.	2777	0.998199	1
ASNA1-201	154	G	0	2914	0	0	1	0	.	2915	0.999657	1
ASNA1-201	155	T	0	1	1	2861	1	0	.	2864	0.998953	1
ASNA1-201	156	G	1	2938	1	1	0	0	.	2941	0.99898	1
ASNA1-201	157	T	1	5	0	2930	0	0	.	2936	0.997956	1
ASNA1-201	158	G	4	3004	2	1	2	1	C	3014	0.996682	1
ASNA1-201	159	G	0	3040	1	3	0	0	.	3044	0.998686	1
ASNA1-201	160	G	4	3018	2	1	0	0	.	3025	0.997686	1
ASNA1-201	161	C	2	1	2878	3	0	0	.	2884	0.99792	1
ASNA1-201	162	A	2297	1	2	2	0	0	.	2302	0.997828	1
ASNA1-201	163	A	2276	2	7	0	0	0	.	2285	0.996061	1
ASNA1-201	164	G	0	2360	1	1	0	0	.	2362	0.999153	1
ASNA1-201	165	A	1894	0	29	2	0	0	.	1925	0.983896	1
ASNA1-201	166	C	4	0	2267	0	0	0	.	2271	0.998239	1
ASNA1-201	167	C	5	0	2098	1	0	0	.	2104	0.997148	1
ASNA1-201	168	A	1889	4	19	1	0	0	.	1913	0.987454	1
ASNA1-201	169	C	0	0	2219	0	0	0	.	2219	1	1
ASNA1-201	170	C	0	0	2169	0	0	0	.	2169	1	1
ASNA1-201	171	T	1	1	1	2097	0	0	.	2100	0.998571	1
ASNA1-201	172	G	2	2103	1	0	0	0	.	2106	0.998575	1
ASNA1-201	173	C	2	0	1990	0	0	0	.	1992	0.998996	1
ASNA1-201	174	A	1835	0	8	0	0	0	.	1843	0.995659	1
ASNA1-201	175	G	0	2044	1	1	0	1	C	2047	0.998534	1
ASNA1-201	176	C	3	0	2023	0	0	0	.	2026	0.998519	1
ASNA1-201	177	T	0	3	0	1988	0	0	.	1991	0.998493	1
ASNA1-201	178	G	1	2010	0	1	0	0	.	2012	0.999006	1
ASNA1-201	179	C	1	1	1883	0	0	0	.	1885	0.998939	1
ASNA1-201	180	A	1632	0	16	1	0	0	.	1649	0.989691	1
ASNA1-201	181	G	0	1938	0	2	0	0	.	1940	0.998969	1
ASNA1-201	182	C	1	1	1939	0	0	0	.	1941	0.99897	1
ASNA1-201	183	C	3	0	1856	2	0	0	.	1861	0.997313	1
ASNA1-201	184	T	0	1	2	1836	1	0	.	1840	0.997826	1
ASNA1-201	185	G	1	1923	0	2	0	0	.	1926	0.998442	1
ASNA1-201	186	G	0	1895	0	0	0	0	.	1895	1	1
ASNA1-201	187	C	1	4	1868	0	0	0	.	1873	0.99733	1
ASNA1-201	188	A	1745	0	0	1	0	0	.	1746	0.999427	1
ASNA1-201	189	G	3	1952	0	0	0	0	.	1955	0.998465	1
ASNA1-201	190	T	0	3	0	1849	0	0	.	1852	0.99838	1
ASNA1-201	191	C	0	1	1830	1	0	0	.	1832	0.998908	1
ASNA1-201	192	C	3	0	1618	1	0	0	.	1622	0.997534	1
ASNA1-201	193	A	1627	0	11	1	0	0	.	1639	0.992678	1
ASNA1-201	194	G	2	1891	1	0	0	0	.	1894	0.998416	1
ASNA1-201	195	C	0	1	1833	1	0	0	.	1835	0.99891	1
ASNA1-201	196	T	0	1	1	1749	0	0	.	1751	0.998858	1
ASNA1-201	197	C	0	0	2105	0	0	0	.	2105	1	1
ASNA1-201	198	T	0	2	1	2070	0	0	.	2073	0.998553	1
ASNA1-201	199	C	5	3	2126	0	0	0	.	2134	0.996251	1
ASNA1-201	200	C	0	0	1987	0	0	0	.	1987	1	1
ASNA1-201	201	A	1930	1	0	0	0	0	.	1931	0.999482	1
ASNA1-201	202	A	1935	6	3	0	0	0	.	1944	0.99537	1
ASNA1-201	203	G	1	2076	0	1	1	0	.	2079	0.998557	1
ASNA1-201	204	G	1	2138	1	0	0	0	.	2140	0.999065	1
ASNA1-201	205	G	0	2135	0	0	0	0	.	2135	1	1
ASNA1-201	206	G	1	2194	0	1	0	0	.	2196	0.999089	1
ASNA1-201	207	C	3	0	2206	1	0	0	.	2210	0.99819	1
ASNA1-201	208	G	0	2245	1	1	0	0	.	2247	0.99911	1
ASNA1-201	209	T	1	4	2	2094	1	0	.	2102	0.996194	1
ASNA1-201	210	G	0	2261	1	2	0	0	.	2264	0.998675	1
ASNA1-201	211	A	2304	0	3	1	0	0	.	2308	0.998267	1
ASNA1-201	212	G	1	2414	0	1	0	0	.	2416	0.999172	1
ASNA1-201	213	A	2318	1	1	0	0	0	.	2320	0.999138	1
ASNA1-201	214	G	2	2415	1	0	0	0	.	2418	0.998759	1
ASNA1-201	215	T	1	5	6	2328	0	0	.	2340	0.994872	1
ASNA1-201	216	G	3	2576	1	4	0	0	.	2584	0.996904	1
ASNA1-201	217	T	0	4	3	2421	0	0	.	2428	0.997117	1
ASNA1-201	218	T	1	3	3	2389	0	0	.	2396	0.997078	1
ASNA1-201	219	C	5	2	2304	3	0	0	.	2314	0.995678	1
ASNA1-201	220	T	1	1	2	2401	0	0	.	2405	0.998337	1
ASNA1-201	221	G	0	2529	0	2	0	1	ATC	2532	0.998815	1
ASNA1-201	222	A	2295	1	7	1	0	0	.	2304	0.996094	1
ASNA1-201	223	T	1	0	0	2429	0	0	.	2430	0.999588	1
ASNA1-201	224	C	3	1	2347	1	0	0	.	2352	0.997874	1
ASNA1-201	225	A	2311	0	3	1	0	0	.	2315	0.998272	1
ASNA1-201	226	T	0	3	0	2493	0	0	.	2496	0.998798	1
ASNA1-201	227	C	3	1	2557	1	0	0	.	2562	0.998048	1
ASNA1-201	228	T	0	0	4	2506	0	0	.	2510	0.998406	1
ASNA1-201	229	C	1	0	2708	3	0	0	.	2712	0.998525	1
ASNA1-201	230	C	1	0	2679	0	0	0	.	2680	0.999627	1
ASNA1-201	231	A	2398	1	9	2	0	0	.	2410	0.995021	1
ASNA1-201	232	C	3	0	2606	3	0	0	.	2612	0.997703	1
ASNA1-201	233	A	2667	2	4	0	0	0	.	2673	0.997755	1
ASNA1-201	234	G	1	2728	0	0	0	0	.	2729	0.999634	1
ASNA1-201	235	A	2169	0	55	1	0	0	.	2225	0.974831	1
ASNA1-201	236	C	0	0	2854	0	0	0	.	2854	1	1
ASNA1-201	237	C	6	0	2721	1	0	0	.	2728	0.997434	1
ASNA1-201	238	C	1	2	2852	0	0	0	.	2855	0.998949	1
ASNA1-201	239	A	2679	0	9	1	0	0	.	2689	0.996281	1
ASNA1-201	240	G	1	3018	0	1	0	0	.	3020	0.999338	1
ASNA1-201	241	C	1	0	3040	0	0	0	.	3041	0.999671	1
ASNA1-201	242	A	2701	1	8	3	0	0	.	2713	0.995577	1
ASNA1-201	243	C	1	0	3035	0	0	0	.	3036	0.999671	1
ASNA1-201	244	A	2868	1	8	0	0	0	.	2877	0.996872	1
ASNA1-201	245	C	0	2	3310	1	0	0	.	3313	0.999094	1
ASNA1-201	246	A	3135	1	5	0	0	0	.	3141	0.99809	1
ASNA1-201	247	A	3119	0	8	0	0	0	.	3127	0.997442	1
ASNA1-201	248	C	0	0	3376	0	0	0	.	3376	1	1
ASNA1-201	249	A	3171	2	6	1	0	0	.	3180	0.99717	1
ASNA1-201	250	T	0	6	2	3361	0	0	.	3369	0.997625	1
ASNA1-201	251	C	2	0	3380	0	0	0	.	3382	0.999409	1
ASNA1-201	252	T	0	1	1	3414	0	0	.	3416	0.999415	1
ASNA1-201	253	C	1	2	3350	1	0	0	.	3354	0.998807	1
ASNA1-201	254	A	3299	1	3	1	0	0	.	3304	0.998487	1
ASNA1-201	255	G	17	3361	4	4	0	0	.	3386	0.992617	1
ASNA1-201	256	A	3255	1	12	0	0	0	.	3268	0.996022	1
ASNA1-201	257	T	1	2	2	3427	0	0	.	3432	0.998543	1
ASNA1-201	258	G	17	3449	3	5	0	0	.	3474	0.992804	1
ASNA1-201	259	C	5	7	3407	5	0	0	.	3424	0.995035	1
ASNA1-201	260	T	0	2	8	3431	0	0	.	3441	0.997094	1
ASNA1-201	261	T	1	3	15	3445	0	0	.	3464	0.994515	1
ASNA1-201	262	T	0	1	1	3514	0	0	.	3516	0.999431	1
ASNA1-201	263	T	0	0	3	3499	0	0	.	3502	0.999143	1
ASNA1-201	264	G	2	3527	0	1	0	0	.	3530	0.99915	1
ASNA1-201	265	A	3095	1	27	1	0	0	.	3124	0.990717	1
ASNA1-201	266	C	5	0	3439	1	0	0	.	3445	0.998258	1
ASNA1-201	267	C	5	1	3311	0	0	0	.	3317	0.998191	1
ASNA1-201	268	A	3444	3	0	2	0	0	.	3449	0.99855	1
ASNA1-201	269	G	1	3570	1	1	0	0	.	3573	0.99916	1
ASNA1-201	270	A	3334	1	3	0	0	0	.	3338	0.998802	1
ASNA1-201	271	A	3247	5	2	1	0	0	.	3255	0.997542	1
ASNA1-201	272	G	4	3403	2	1	0	0	.	3410	0.997947	1
ASNA1-201	273	T	1	3	3	3238	1	0	.	3246	0.997535	1
ASNA1-201	274	T	0	2	2	3506	0	0	.	3510	0.99886	1
ASNA1-201	275	C	8	0	3479	0	0	0	.	3487	0.997706	1
ASNA1-201	276	T	0	3	0	3606	0	0	.	3609	0.999169	1
ASNA1-201	277	C	2	1	3603	0	0	0	.	3606	0.999168	1
ASNA1-201	278	A	3484	1	1	0	1	0	.	3487	0.99914	1
ASNA1-201	279	A	3404	2	4	0	0	0	.	3410	0.99824	1
ASNA1-201	280	A	3400	1	2	0	0	0	.	3403	0.999118	1
ASNA1-201	281	G	0	3423	0	6	0	0	.	3429	0.99825	1
ASNA1-201	282	G	0	3375	0	2	0	0	.	3377	0.999408	1
ASNA1-201	283	T	1	6	3	3273	0	0	.	3283	0.996954	1
ASNA1-201	284	G	1	3445	0	3	0	0	.	3449	0.99884	1
ASNA1-201	285	C	8	0	3319	2	0	0	.	3329	0.996996	1
ASNA1-201	286	C	3	1	3335	1	0	0	.	3340	0.998503	1
ASNA1-201	287	T	0	1	7	3334	0	0	.	3342	0.997606	1
ASNA1-201	288	A	3267	1	7	0	0	0	.	3275	0.997557	1
ASNA1-201	289	C	3	0	3418	0	0	0	.	3421	0.999123	1
ASNA1-201	290	C	10	0	3104	1	0	0	.	3115	0.996469	1
ASNA1-201	291	A	3148	0	1	1	1	0	.	3151	0.999048	1
ASNA1-201	292	A	3189	0	0	0	0	0	.	3189	1	1
ASNA1-201	293	G	0	3262	1	5	0	0	.	3268	0.998164	1
ASNA1-201	294	G	0	3330	2	1	0	0	.	3333	0.9991	1
ASNA1-201	295	T	0	11	0	3123	0	0	.	3134	0.99649	1
ASNA1-201	296	C	3	1	3277	1	0	0	.	3282	0.998477	1
ASNA1-201	297	A	3233	1	1	1	0	0	.	3236	0.999073	1
ASNA1-201	298	A	3168	0	4	1	0	0	.	3173	0.998424	1
ASNA1-201	299	A	3103	1	4	0	0	0	.	3108	0.998391	1
ASNA1-201	300	G	1	3515	0	0	0	0	.	3516	0.999716	1
ASNA1-201	301	G	5	3408	0	3	0	0	.	3416	0.997658	1
ASNA1-201	302	C	3	3	3302	0	0	0	.	3308	0.998186	1
ASNA1-201	303	T	1	3	1	3142	0	0	.	3147	0.998411	1
ASNA1-201	304	A	3187	0	2	3	0	0	.	3192	0.998434	1
ASNA1-201	305	T	1	3	1	3224	0	0	.	3229	0.998452	1
ASNA1-201	306	G	0	3260	2	0	0	0	.	3262	0.999387	1
ASNA1-201	307	A	2963	0	18	1	0	0	.	2982	0.993628	1
ASNA1-201	308	C	1	0	2971	0	0	0	.	2972	0.999664	1
ASNA1-201	309	A	2829	1	7	0	0	0	.	2837	0.99718	1
ASNA1-201	310	A	2676	3	10	0	0	0	.	2689	0.995165	1
ASNA1-201	311	C	4	0	3135	4	0	0	.	3143	0.997455	1
ASNA1-201	312	C	1	1	3116	3	0	0	.	3121	0.998398	1
ASNA1-201	313	T	0	4	8	3063	0	0	.	3075	0.996098	1
ASNA1-201	314	C	2	0	3140	1	0	0	.	3143	0.999045	1
ASNA1-201	315	T	0	2	9	2929	1	0	.	2941	0.99592	1
ASNA1-201	316	T	2	2	4	3217	0	0	.	3225	0.997519	1
ASNA1-201	317	T	0	1	5	3299	0	0	.	3305	0.998185	1
ASNA1-201	318	G	7	3510	6	2	0	0	.	3525	0.995745	1
ASNA1-201	319	C	2	6	3322	9	0	0	.	3339	0.994909	1
ASNA1-201	320	T	0	5	0	3222	1	0	.	3228	0.998141	1
ASNA1-201	321	A	3110	0	0	0	1	0	.	3111	0.999679	1
ASNA1-201	322	T	7	12	1	3308	0	0	.	3328	0.99399	1
ASNA1-201	323	G	0	3304	0	2	5	0	.	3311	0.997886	1
ASNA1-201	324	G	21	3210	1	1	5	0	.	3238	0.991353	1
ASNA1-201	325	A	3230	3	0	7	6	0	.	3246	0.995071	1
ASNA1-201	326	G	40	3218	53	15	0	0	.	3326	0.967529	1
ASNA1-201	327	A	3182	1	7	1	0	0	.	3191	0.99718	1
ASNA1-201	328	T	1	1	1	3237	0	0	.	3240	0.999074	1
ASNA1-201	329	T	0	3	3	3263	0	0	.	3269	0.998165	1
ASNA1-201	330	G	15	3396	3	5	0	0	.	3419	0.993273	1
ASNA1-201	331	A	2923	1	39	1	0	0	.	2964	0.986167	1
ASNA1-201	332	C	2	0	3600	3	1	0	.	3606	0.998336	1
ASNA1-201	333	C	7	4	3483	4	0	0	.	3498	0.995712	1
ASNA1-201	334	C	6	1	3512	2	0	0	.	3521	0.997444	1
ASNA1-201	335	C	1	3	3535	3	0	0	.	3542	0.998024	1
ASNA1-201	336	A	3203	2	15	0	0	0	.	3220	0.99472	1
ASNA1-201	337	G	10	3658	3	1	0	0	.	3672	0.996187	1
ASNA1-201	338	C	8	4	3721	19	0	0	.	3752	0.991738	1
ASNA1-201	339	C	2	0	3578	4	0	0	.	3584	0.998326	1
ASNA1-201	340	T	0	3	3	3457	0	0	.	3463	0.998267	1
ASNA1-201	341	G	1	3669	0	1	0	0	.	3671	0.999455	1
ASNA1-201	342	G	0	3619	1	3	0	0	.	3623	0.998896	1
ASNA1-201	343	G	4	3792	0	2	0	0	.	3798	0.99842	1
ASNA1-201	344	C	3	0	3700	4	0	0	.	3707	0.998112	1
ASNA1-201	345	G	0	3701	1	1	0	0	.	3703	0.99946	1
ASNA1-201	346	T	0	8	2	3414	0	0	.	3424	0.997079	1
ASNA1-201	347	G	2	3691	0	1	0	0	.	3694	0.999188	1
ASNA1-201	348	G	4	3636	4	6	0	0	.	3650	0.996164	1
ASNA1-201	349	C	3	0	3489	1	0	0	.	3493	0.998855	1
ASNA1-201	350	G	2	3487	0	1	0	0	.	3490	0.99914	1
ASNA1-201	351	G	0	3549	0	3	0	0	.	3552	0.999155	1
ASNA1-201	352	A	3287	0	12	0	0	0	.	3299	0.996363	1
ASNA1-201	353	G	8	3582	9	1	0	0	.	3600	0.995	1
ASNA1-201	354	C	2	1	3516	2	0	0	.	3521	0.99858	1
ASNA1-201	355	T	0	9	0	3288	0	0	.	3297	0.99727	1
ASNA1-201	356	G	5	3529	1	2	0	0	.	3537	0.997738	1
ASNA1-201	357	C	14	0	3483	5	1	0	.	3503	0.994291	1
ASNA1-201	358	C	1	0	3382	1	0	0	.	3384	0.999409	1
ASNA1-201	359	T	1	5	2	3267	0	0	.	3275	0.997557	1
ASNA1-201	360	G	2	3520	0	1	0	0	.	3523	0.999148	1
ASNA1-201	361	A	3160	0	17	1	0	0	.	3178	0.994336	1
ASNA1-201	362	C	2	0	3395	5	0	0	.	3402	0.997942	1
ASNA1-201	363	G	3	3421	0	3	0	0	.	3427	0.998249	1
ASNA1-201	364	A	3409	2	4	1	0	0	.	3416	0.997951	1
ASNA1-201	365	G	2	3531	3	1	0	0	.	3537	0.998304	1
ASNA1-201	366	T	0	9	5	3191	0	0	.	3205	0.995632	1
ASNA1-201	367	T	0	4	2	3313	0	0	.	3319	0.998192	1
ASNA1-201	368	C	10	0	3180	0	0	0	.	3190	0.996865	1
ASNA1-201	369	T	0	3	7	3205	0	0	.	3215	0.99689	1
ASNA1-201	370	T	0	3	2	3342	0	0	.	3347	0.998506	1
ASNA1-201	371	C	5	0	3381	0	0	0	.	3386	0.998523	1
ASNA1-201	372	G	0	3432	0	4	0	0	.	3436	0.998836	1
ASNA1-201	373	A	3393	0	4	0	0	0	.	3397	0.998822	1
ASNA1-201	374	G	1	3413	1	1	0	0	.	3416	0.999122	1
ASNA1-201	375	G	1	3220	0	0	0	0	.	3221	0.99969	1
ASNA1-201	376	A	3102	1	2	1	0	0	.	3106	0.998712	1
ASNA1-201	377	G	1	3221	1	0	0	0	.	3223	0.999379	1
ASNA1-201	378	G	1	3275	0	2	0	0	.	3278	0.999085	1
ASNA1-201	379	A	3261	1	6	1	0	0	.	3269	0.997553	1
ASNA1-201	380	C	3	2	3576	1	0	0	.	3582	0.998325	1
ASNA1-201	381	A	3624	4	6	0	0	0	.	3634	0.997248	1
ASNA1-201	382	A	3634	0	4	0	0	0	.	3638	0.9989	1
ASNA1-201	383	C	3	1	3668	1	0	0	.	3673	0.998639	1
ASNA1-201	384	A	3675	3	6	1	0	0	.	3685	0.997286	1
ASNA1-201	385	T	0	6	5	3669	0	0	.	3680	0.997011	1
ASNA1-201	386	G	5	3493	0	1	0	0	.	3499	0.998285	1
ASNA1-201	387	C	4	0	3477	7	0	0	.	3488	0.996846	1
ASNA1-201	388	T	0	3	5	3189	0	0	.	3197	0.997498	1
ASNA1-201	389	G	0	3485	0	2	0	0	.	3487	0.999426	1
ASNA1-201	390	A	3303	3	15	0	0	0	.	3321	0.99458	1
ASNA1-201	391	G	2	3476	0	6	0	0	.	3484	0.997704	1
ASNA1-201	392	C	4	0	3370	4	0	0	.	3378	0.997632	1
ASNA1-201	393	A	3288	0	2	1	0	0	.	3291	0.999088	1
ASNA1-201	394	T	1	4	0	3169	0	0	.	3174	0.998425	1
ASNA1-201	395	G	1	3366	1	3	1	0	.	3372	0.998221	1
ASNA1-201	396	G	1	3472	1	1	0	0	.	3475	0.999137	1
ASNA1-201	397	G	1	3317	3	1	0	0	.	3322	0.998495	1
ASNA1-201	398	C	6	0	3442	0	0	0	.	3448	0.99826	1
ASNA1-201	399	A	3329	0	0	1	0	0	.	3330	0.9997	1
ASNA1-201	400	A	3294	3	0	1	0	0	.	3298	0.998787	1
ASNA1-201	401	G	2	3408	0	3	0	0	.	3413	0.998535	1
ASNA1-201	402	A	3261	1	3	0	0	0	.	3265	0.998775	1
ASNA1-201	403	A	3154	0	5	0	0	0	.	3159	0.998417	1
ASNA1-201	404	G	0	3170	0	5	0	0	.	3175	0.998425	1
ASNA1-201	405	A	3288	1	6	1	0	0	.	3296	0.997573	1
ASNA1-201	406	T	2	4	6	3145	0	0	.	3157	0.996199	1
ASNA1-201	407	G	0	3231	0	2	0	0	.	3233	0.999381	1
ASNA1-201	408	A	3324	2	3	1	0	0	.	3330	0.998198	1
ASNA1-201	409	T	2	5	0	3203	0	0	.	3210	0.997819	1
ASNA1-201	410	G	2	3389	1	4	0	0	.	3396	0.997939	1
ASNA1-201	411	C	5	2	3361	1	0	0	.	3369	0.997625	1
ASNA1-201	412	A	3202	1	3	0	1	0	.	3207	0.998441	1
ASNA1-201	413	G	1	3275	0	1	0	0	.	3277	0.99939	1
ASNA1-201	414	G	0	3337	0	1	0	0	.	3338	0.9997	1
ASNA1-201	415	A	3186	2	8	0	0	0	.	3196	0.996871	1
ASNA1-201	416	G	0	3322	1	2	0	0	.	3325	0.999098	1
ASNA1-201	417	G	0	3439	0	3	0	0	.	3442	0.999128	1
ASNA1-201	418	C	5	0	3479	3	0	0	.	3487	0.997706	1
ASNA1-201	419	C	2	1	3453	2	0	0	.	3458	0.998554	1
ASNA1-201	420	A	3478	3	1	2	0	0	.	3484	0.998278	1
ASNA1-201	421	T	0	5	1	3361	0	0	.	3367	0.998218	1
ASNA1-201	422	G	0	3455	0	2	0	0	.	3457	0.999421	1
ASNA1-201	423	A	3278	1	16	1	0	0	.	3296	0.994539	1
ASNA1-201	424	G	0	3450	0	1	0	0	.	3451	0.99971	1
ASNA1-201	425	C	6	0	3460	2	0	0	.	3468	0.997693	1
ASNA1-201	426	G	7	3483	2	7	0	0	.	3499	0.995427	1
ASNA1-201	427	C	4	0	3498	4	0	0	.	3506	0.997718	1
ASNA1-201	428	A	3534	2	1	0	0	0	.	3537	0.999152	1
ASNA1-201	429	T	1	2	10	3353	1	0	.	3367	0.995842	1
ASNA1-201	430	T	0	1	4	3420	0	0	.	3425	0.99854	1
ASNA1-201	431	T	2	0	0	3481	0	0	.	3483	0.999426	1
ASNA1-201	432	C	5	1	3594	0	0	0	.	3600	0.998333	1
ASNA1-201	433	C	2	1	3561	3	0	0	.	3567	0.998318	1
ASNA1-201	434	C	1	0	3518	1	0	0	.	3520	0.999432	1
ASNA1-201	435	G	2	3444	0	2	0	0	.	3448	0.99884	1
ASNA1-201	436	G	5	3475	2	5	0	0	.	3487	0.996559	1
ASNA1-201	437	C	2	1	3678	1	0	0	.	3682	0.998914	1
ASNA1-201	438	A	3556	1	4	0	0	0	.	3561	0.998596	1
ASNA1-201	439	T	0	10	2	3407	0	0	.	3419	0.99649	1
ASNA1-201	440	C	6	0	3757	7	0	0	.	3770	0.996552	1
ASNA1-201	441	G	0	3747	2	3	0	0	.	3752	0.998667	1
ASNA1-201	442	A	3782	4	4	1	0	0	.	3791	0.997626	1
ASNA1-201	443	T	2	7	5	3457	0	0	.	3471	0.995967	1
ASNA1-201	444	G	0	3762	1	1	0	0	.	3764	0.999469	1
ASNA1-201	445	A	3583	1	5	1	0	0	.	3590	0.99805	1
ASNA1-201	446	G	17	3801	3	3	0	0	.	3824	0.993985	1
ASNA1-201	447	G	31	3972	1	11	0	0	.	4015	0.98929	1
ASNA1-201	448	C	3	2	4017	31	0	0	.	4053	0.991118	1
ASNA1-201	449	C	7	0	3937	8	0	0	.	3952	0.996204	1
ASNA1-201	450	A	4006	0	3	1	0	0	.	4010	0.999002	1
ASNA1-201	451	T	0	5	2	3854	0	0	.	3861	0.998187	1
ASNA1-201	452	G	21	4007	4	25	1	0	.	4058	0.987432	1
ASNA1-201	453	A	4002	2	9	1	0	1	G	4015	0.996762	1
ASNA1-201	454	G	15	4073	134	6	0	0	.	4228	0.96334	1
ASNA1-201	455	C	31	4	3868	81	2	0	.	3986	0.970396	1
ASNA1-201	456	T	1	5	4	3887	0	0	.	3897	0.997434	1
ASNA1-201	457	A	4027	1	7	0	0	0	.	4035	0.998017	1
ASNA1-201	458	T	0	3	5	3903	0	0	.	3911	0.997954	1
ASNA1-201	459	G	2	4077	0	0	0	0	.	4079	0.99951	1
ASNA1-201	460	C	8	5	3680	190	0	0	.	3883	0.947721	1
ASNA1-201	461	C	1	3	3785	7	0	0	.	3796	0.997102	1
ASNA1-201	462	G	4	3789	0	1	0	0	.	3794	0.998682	1
ASNA1-201	463	A	3754	0	9	0	0	0	.	3763	0.997608	1
ASNA1-201	464	G	32	3809	16	5	0	0	.	3862	0.986277	1
ASNA1-201	465	G	25	4316	13	14	0	0	.	4368	0.988095	1
ASNA1-201	466	T	1	27	20	3677	0	0	.	3725	0.987114	1
ASNA1-201	467	C	3	2	4311	1	0	0	.	4317	0.99861	1
ASNA1-201	468	A	4189	2	1	0	0	0	.	4192	0.999284	1
ASNA1-201	469	T	0	7	5	4116	0	0	.	4128	0.997093	1
ASNA1-201	470	G	4	4231	0	2	0	0	.	4237	0.998584	1
ASNA1-201	471	A	4101	0	9	1	0	0	.	4111	0.997568	1
ASNA1-201	472	G	4	4202	0	6	0	0	.	4212	0.997626	1
ASNA1-201	473	G	5	4104	1	5	0	0	.	4115	0.997327	1
ASNA1-201	474	C	6	8	3999	6	0	0	.	4019	0.995024	1
ASNA1-201	475	T	1	10	3	3739	0	0	.	3753	0.99627	1
ASNA1-201	476	G	13	4198	2	3	0	0	.	4216	0.995731	1
ASNA1-201	477	G	17	4298	0	6	0	0	.	4321	0.994677	1
ASNA1-201	478	T	1	18	3	3717	0	0	.	3739	0.994116	1
ASNA1-201	479	G	0	4209	2	4	0	0	.	4215	0.998577	1
ASNA1-201	480	A	3944	1	2	0	0	0	.	3947	0.99924	1
ASNA1-201	481	A	3790	2	3	0	0	0	.	3795	0.998682	1
ASNA1-201	482	G	2	3959	0	5	1	0	.	3967	0.997983	1
ASNA1-201	483	G	1	3928	0	3	0	0	.	3932	0.998983	1
ASNA1-201	484	G	10	4019	0	1	0	0	.	4030	0.99727	1
ASNA1-201	485	C	11	3	4058	4	0	0	.	4076	0.995584	1
ASNA1-201	486	A	4023	0	3	1	0	0	.	4027	0.999007	1
ASNA1-201	487	T	0	10	11	3894	0	0	.	3915	0.994636	1
ASNA1-201	488	G	0	4012	1	6	0	0	.	4019	0.998258	1
ASNA1-201	489	A	4104	0	7	0	0	0	.	4111	0.998297	1
ASNA1-201	490	A	3934	2	5	1	0	0	.	3942	0.997971	1
ASNA1-201	491	C	4	31	4011	7	0	0	.	4053	0.989637	1
ASNA1-201	492	T	0	5	1	3918	0	0	.	3924	0.998471	1
ASNA1-201	493	T	1	4	2	4163	0	0	.	4170	0.998321	1
ASNA1-201	494	C	6	11	4209	2	0	0	.	4228	0.995506	1
ASNA1-201	495	T	0	1	4	4153	0	0	.	4158	0.998797	1
ASNA1-201	496	C	1	2	4163	5	0	0	.	4171	0.998082	1
ASNA1-201	497	G	2	4187	1	5	0	0	.	4195	0.998093	1
ASNA1-201	498	G	4	4279	4	2	0	0	.	4289	0.997668	1
ASNA1-201	499	T	0	16	2	3761	0	0	.	3779	0.995237	1
ASNA1-201	500	G	1	4132	0	4	0	0	.	4137	0.998791	1
ASNA1-201	501	G	1	4208	2	3	0	0	.	4214	0.998576	1
ASNA1-201	502	T	2	15	2	3716	0	0	.	3735	0.994913	1
ASNA1-201	503	G	0	3967	1	12	1	0	.	3981	0.996483	1
ASNA1-201	504	G	2	4492	0	2	0	0	.	4496	0.99911	1
ASNA1-201	505	T	1	9	4	4300	0	0	.	4314	0.996755	1
ASNA1-201	506	A	4356	0	2	0	0	0	.	4358	0.999541	1
ASNA1-201	507	T	1	8	11	4342	0	0	.	4362	0.995415	1
ASNA1-201	508	T	0	1	6	4408	0	0	.	4415	0.998414	1
ASNA1-201	509	T	0	6	3	4394	0	0	.	4403	0.997956	1
ASNA1-201	510	G	5	4399	0	3	0	0	.	4407	0.998185	1
ASNA1-201	511	A	3992	6	21	0	0	0	.	4019	0.993282	1
ASNA1-201	512	C	3	0	4187	5	0	0	.	4195	0.998093	1
ASNA1-201	513	A	4109	1	22	0	0	0	.	4132	0.994434	1
ASNA1-201	514	C	2	0	4124	4	0	0	.	4130	0.998547	1
ASNA1-201	515	G	1	4363	2	0	0	0	.	4366	0.999313	1
ASNA1-201	516	G	15	4390	0	5	0	0	.	4410	0.995465	1
ASNA1-201	517	C	0	1	4405	1	0	0	.	4407	0.999546	1
ASNA1-201	518	A	3898	2	23	0	0	0	.	3923	0.993627	1
ASNA1-201	519	C	1	2	4592	1	0	0	.	4596	0.99913	1
ASNA1-201	520	C	5	2	4445	2	0	0	.	4454	0.997979	1
ASNA1-201	521	C	1	1	4237	2	0	0	.	4241	0.999057	1
ASNA1-201	522	A	3880	0	15	1	0	0	.	3896	0.995893	1
ASNA1-201	523	C	2	2	4257	1	0	0	.	4262	0.998827	1
ASNA1-201	524	G	2	4311	0	2	1	0	.	4316	0.998842	1
ASNA1-201	525	G	4	4515	0	2	0	0	.	4521	0.998673	1
ASNA1-201	526	G	12	4517	1	3	0	0	.	4533	0.99647	1
ASNA1-201	527	C	2	1	4361	2	0	0	.	4366	0.998855	1
ASNA1-201	528	C	3	1	4231	0	0	0	.	4235	0.999055	1
ASNA1-201	529	A	3844	1	20	1	0	0	.	3866	0.994309	1
ASNA1-201	530	C	4	1	4387	0	0	0	.	4392	0.998862	1
ASNA1-201	531	A	3733	4	16	1	0	0	.	3754	0.994406	1
ASNA1-201	532	C	0	1	4920	2	0	0	.	4923	0.999391	1
ASNA1-201	533	C	3	0	4567	0	0	0	.	4570	0.999344	1
ASNA1-201	534	C	4	1	4700	0	0	0	.	4705	0.998937	1
ASNA1-201	535	T	1	7	14	4511	0	0	.	4533	0.995147	1
ASNA1-201	536	G	1	4738	0	3	0	0	.	4742	0.999156	1
ASNA1-201	537	A	4345	1	18	1	0	0	.	4365	0.995418	1
ASNA1-201	538	G	0	4621	0	2	0	0	.	4623	0.999567	1
ASNA1-201	539	G	0	4557	1	0	0	0	.	4558	0.999781	1
ASNA1-201	540	C	7	2	3935	1	0	0	.	3945	0.997465	1
ASNA1-201	541	T	0	9	2	3595	0	0	.	3606	0.99695	1
ASNA1-201	542	G	6	4051	3	3	0	0	.	4063	0.997047	1
ASNA1-201	543	C	5	3	3940	6	0	0	.	3954	0.996459	1
ASNA1-201	544	T	0	20	4	3648	0	0	.	3672	0.993464	1
ASNA1-201	545	C	2	0	3917	2	0	0	.	3921	0.99898	1
ASNA1-201	546	A	3723	3	5	0	0	0	.	3731	0.997856	1
ASNA1-201	547	A	3626	1	14	4	0	0	.	3645	0.994787	1
ASNA1-201	548	C	1	6	4128	3	0	0	.	4138	0.997583	1
ASNA1-201	549	T	3	1	5	3873	0	0	.	3882	0.997682	1
ASNA1-201	550	T	1	4	4	4035	0	0	.	4044	0.997774	1
ASNA1-201	551	C	1	1	4269	3	0	0	.	4274	0.99883	1
ASNA1-201	552	C	3	1	4198	1	0	0	.	4203	0.99881	1
ASNA1-201	553	C	3	0	4139	0	0	0	.	4142	0.999276	1
ASNA1-201	554	C	6	1	4114	3	0	0	.	4124	0.997575	1
ASNA1-201	555	A	3295	7	17	1	0	0	.	3320	0.99247	1
ASNA1-201	556	C	1	2	4286	6	0	0	.	4295	0.997905	1
ASNA1-201	557	C	5	2	4051	3	0	0	.	4061	0.997538	1
ASNA1-201	558	A	3944	0	5	0	0	0	.	3949	0.998734	1
ASNA1-201	559	T	0	5	2	4106	0	0	.	4113	0.998298	1
ASNA1-201	560	C	1	4	4432	10	0	0	.	4447	0.996627	1
ASNA1-201	561	G	7	4429	1	3	0	0	.	4440	0.997523	1
ASNA1-201	562	T	0	16	1	3840	0	0	.	3857	0.995592	1
ASNA1-201	563	G	2	4374	1	8	1	0	.	4386	0.997264	1
ASNA1-201	564	G	0	4351	1	3	0	0	.	4355	0.999082	1
ASNA1-201	565	A	3983	3	9	1	0	0	.	3996	0.996747	1
ASNA1-201	566	G	8	4452	0	5	0	0	.	4465	0.997088	1
ASNA1-201	567	C	8	7	4324	16	0	0	.	4355	0.992882	1
ASNA1-201	568	G	0	4329	4	5	4	0	.	4342	0.997006	1
ASNA1-201	569	G	3	4357	0	6	0	0	.	4366	0.997939	1
ASNA1-201	570	G	1	4456	1	4	0	0	.	4462	0.998655	1
ASNA1-201	571	G	1	4584	4	3	0	0	.	4592	0.998258	1
ASNA1-201	572	C	2	0	4467	1	0	0	.	4470	0.999329	1
ASNA1-201	573	C	6	0	4295	1	0	0	.	4302	0.998373	1
ASNA1-201	574	T	0	16	3	4065	0	0	.	4084	0.995348	1
ASNA1-201	575	G	1	4496	1	3	1	0	.	4502	0.998667	1
ASNA1-201	576	G	0	4525	0	3	1	0	.	4529	0.999117	1
ASNA1-201	577	G	4	4608	3	3	0	0	.	4618	0.997835	1
ASNA1-201	578	C	1	4	4329	7	0	0	.	4341	0.997236	1
ASNA1-201	579	C	4	2	4223	4	0	0	.	4233	0.997638	1
ASNA1-201	580	G	1	4150	0	2	0	0	.	4153	0.999278	1
ASNA1-201	581	G	14	4379	2	4	0	0	.	4399	0.995454	1
ASNA1-201	582	C	6	1	4336	1	0	0	.	4344	0.998158	1
ASNA1-201	583	T	4	8	8	4157	0	0	.	4177	0.995212	1
ASNA1-201	584	T	1	4	6	4440	1	0	.	4452	0.997305	1
ASNA1-201	585	A	4535	2	3	1	1	0	.	4542	0.998459	1
ASNA1-201	586	T	0	5	5	4508	0	0	.	4518	0.997787	1
ASNA1-201	587	G	2	4534	0	4	0	0	.	4540	0.998678	1
ASNA1-201	588	C	4	0	3930	3	0	0	.	3937	0.998222	1
ASNA1-201	589	A	3905	3	1	1	0	0	.	3910	0.998721	1
ASNA1-201	590	G	2	4071	2	6	0	0	.	4081	0.99755	1
ASNA1-201	591	A	3932	1	12	1	0	0	.	3946	0.996452	1
ASNA1-201	592	T	1	9	0	4046	0	0	.	4056	0.997535	1
ASNA1-201	593	C	5	2	4023	1	0	0	.	4031	0.998015	1
ASNA1-201	594	A	4037	2	0	0	1	0	.	4040	0.999257	1
ASNA1-201	595	A	3895	2	3	1	0	0	.	3901	0.998462	1
ASNA1-201	596	G	2	3997	11	3	0	0	.	4013	0.996013	1
ASNA1-201	597	A	3784	1	17	0	0	0	.	3802	0.995266	1
ASNA1-201	598	A	3483	3	25	1	0	0	.	3512	0.991743	1
ASNA1-201	599	C	2	2	4024	4	0	0	.	4032	0.998016	1
ASNA1-201	600	C	6	2	3771	0	0	0	.	3779	0.997883	1
ASNA1-201	601	A	3728	3	2	2	0	0	.	3735	0.998126	1
ASNA1-201	602	G	2	3746	3	6	0	0	.	3757	0.997072	1
ASNA1-201	603	A	3672	0	17	0	0	0	.	3689	0.995392	1
ASNA1-201	604	T	2	9	1	3678	0	0	.	3690	0.996748	1
ASNA1-201	605	C	3	4	3240	0	0	0	.	3247	0.997844	1
ASNA1-201	606	A	3046	0	7	0	0	0	.	3053	0.997707	1
ASNA1-201	607	G	1	3177	4	0	0	0	.	3182	0.998429	1
ASNA1-201	608	C	3	0	3353	2	0	0	.	3358	0.998511	1
ASNA1-201	609	C	5	2	3304	0	0	0	.	3311	0.997886	1
ASNA1-201	610	C	7	1	3182	1	0	0	.	3191	0.99718	1
ASNA1-201	611	T	0	4	2	3135	0	0	.	3141	0.99809	1
ASNA1-201	612	T	2	4	18	3177	0	0	.	3201	0.992502	1
ASNA1-201	613	T	0	4	5	3369	0	0	.	3378	0.997336	1
ASNA1-201	614	C	3	2	3414	1	0	0	.	3420	0.998246	1
ASNA1-201	615	A	3267	3	3	0	0	0	.	3273	0.998167	1
ASNA1-201	616	T	0	4	2	3396	0	0	.	3402	0.998236	1
ASNA1-201	617	C	4	1	3385	0	0	0	.	3390	0.998525	1
ASNA1-201	618	T	3	2	2	3381	0	0	.	3388	0.997934	1
ASNA1-201	619	C	1	0	3412	0	0	0	.	3413	0.999707	1
ASNA1-201	620	A	3144	2	10	0	0	1	T	3157	0.995882	1
ASNA1-201	621	C	5	1	3259	1	0	0	.	3266	0.997857	1
ASNA1-201	622	A	3174	5	3	0	0	0	.	3182	0.997486	1
ASNA1-201	623	G	0	3279	1	2	0	0	.	3282	0.999086	1
ASNA1-201	624	A	3046	2	5	0	0	0	.	3053	0.997707	1
ASNA1-201	625	T	1	5	0	3075	0	0	.	3081	0.998053	1
ASNA1-201	626	G	0	3126	0	5	0	0	.	3131	0.998403	1
ASNA1-201	627	T	2	1	5	2929	0	0	.	2937	0.997276	1
ASNA1-201	628	G	4	3177	1	2	0	0	.	3184	0.997802	1
ASNA1-201	629	C	1	0	3131	14	0	0	.	3146	0.995232	1
ASNA1-201	630	A	2978	3	3	0	0	0	.	2984	0.997989	1
ASNA1-201	631	A	2761	1	2	3	0	0	.	2767	0.997832	1
ASNA1-201	632	C	2	4	2782	4	0	0	.	2792	0.996418	1
ASNA1-201	633	A	2747	1	5	0	0	0	.	2753	0.997821	1
ASNA1-201	634	T	0	4	0	2657	0	0	.	2661	0.998497	1
ASNA1-201	635	G	7	2765	2	5	0	0	.	2779	0.994962	1
ASNA1-201	636	C	2	4	2622	14	0	0	.	2642	0.99243	1
ASNA1-201	637	T	1	4	2	2397	0	0	.	2404	0.997088	1
ASNA1-201	638	G	2	2644	1	2	0	0	.	2649	0.998112	1
ASNA1-201	639	G	3	2614	1	1	0	0	.	2619	0.998091	1
ASNA1-201	640	G	2	2678	0	4	0	0	.	2684	0.997765	1
ASNA1-201	641	C	3	2	2514	0	0	0	.	2519	0.998015	1
ASNA1-201	642	C	4	0	2347	0	0	0	.	2351	0.998299	1
ASNA1-201	643	T	0	12	1	2188	0	0	.	2201	0.994094	1
ASNA1-201	644	G	1	2805	0	1	0	0	.	2807	0.999287	1
ASNA1-201	645	G	2	2686	1	2	0	0	.	2691	0.998142	1
ASNA1-201	646	G	0	2686	0	2	0	0	.	2688	0.999256	1
ASNA1-201	647	G	1	2637	1	3	0	0	.	2642	0.998107	1
ASNA1-201	648	G	5	2598	1	2	0	0	.	2606	0.99693	1
ASNA1-201	649	A	2488	0	2	0	1	0	.	2491	0.998796	1
ASNA1-201	650	C	1	4	2612	5	0	0	.	2622	0.996186	1
ASNA1-201	651	A	2741	1	2	0	0	0	.	2744	0.998907	1
ASNA1-201	652	T	2	3	4	2642	0	0	.	2651	0.996605	1
ASNA1-201	653	G	0	2912	0	4	0	0	.	2916	0.998628	1
ASNA1-201	654	A	2798	1	9	0	0	0	.	2808	0.996439	1
ASNA1-201	655	A	2548	1	13	2	0	0	.	2564	0.99376	1
ASNA1-201	656	C	2	1	2877	2	0	0	.	2882	0.998265	1
ASNA1-201	657	G	2	2724	2	3	0	0	.	2731	0.997437	1
ASNA1-201	658	C	1	0	2735	0	0	0	.	2736	0.999635	1
ASNA1-201	659	A	2638	2	8	0	0	0	.	2648	0.996224	1
ASNA1-201	660	G	2	2764	1	3	0	0	.	2770	0.997834	1
ASNA1-201	661	A	2598	0	11	0	0	0	.	2609	0.995784	1
ASNA1-201	662	C	0	3	2857	0	0	0	.	2860	0.998951	1
ASNA1-201	663	C	10	0	2730	0	0	0	.	2740	0.99635	1
ASNA1-201	664	A	2682	1	5	0	0	0	.	2688	0.997768	1
ASNA1-201	665	G	0	2804	5	3	0	0	.	2812	0.997155	1
ASNA1-201	666	C	0	0	2818	0	0	0	.	2818	1	1
ASNA1-201	667	T	0	5	1	2574	0	0	.	2580	0.997674	1
ASNA1-201	668	G	0	2509	2	4	0	0	.	2515	0.997614	1
ASNA1-201	669	G	1	2721	0	4	0	0	.	2726	0.998166	1
ASNA1-201	670	C	1	1	2800	1	0	0	.	2803	0.99893	1
ASNA1-201	671	C	0	0	2782	2	0	0	.	2784	0.999282	1
ASNA1-201	672	T	0	2	2	2589	0	0	.	2593	0.998457	1
ASNA1-201	673	C	3	0	2719	0	0	0	.	2722	0.998898	1
ASNA1-201	674	C	0	0	2906	3	0	0	.	2909	0.998969	1
ASNA1-201	675	A	2819	2	4	0	0	0	.	2825	0.997876	1
ASNA1-201	676	A	2711	1	7	0	0	0	.	2719	0.997058	1
ASNA1-201	677	G	0	2829	0	2	0	0	.	2831	0.999294	1
ASNA1-201	678	C	4	3	2865	2	0	0	.	2874	0.996868	1
ASNA1-201	679	T	0	8	3	2522	0	0	.	2533	0.995657	1
ASNA1-201	680	G	0	2774	0	3	0	0	.	2777	0.99892	1
ASNA1-201	681	G	0	2820	0	1	0	0	.	2821	0.999646	1
ASNA1-201	682	A	2882	2	0	0	0	0	.	2884	0.999307	1
ASNA1-201	683	G	0	2868	0	2	0	0	.	2870	0.999303	1
ASNA1-201	684	G	1	2875	0	1	0	0	.	2877	0.999305	1
ASNA1-201	685	A	2983	0	2	0	0	1	G	2986	0.998995	1
ASNA1-201	686	G	0	2943	2	6	0	0	.	2951	0.997289	1
ASNA1-201	687	A	2901	1	3	0	0	0	.	2905	0.998623	1
ASNA1-201	688	C	2	0	2910	1	0	0	.	2913	0.99897	1
ASNA1-201	689	G	0	2944	2	1	0	0	.	2947	0.998982	1
ASNA1-201	690	C	5	0	2928	0	0	0	.	2933	0.998295	1
ASNA1-201	691	T	0	9	3	2584	0	0	.	2596	0.995378	1
ASNA1-201	692	G	3	2994	1	2	0	0	.	3000	0.998	1
ASNA1-201	693	C	4	0	3007	1	0	0	.	3012	0.99834	1
ASNA1-201	694	C	1	0	2990	0	0	0	.	2991	0.999666	1
ASNA1-201	695	C	2	0	3024	0	0	0	.	3026	0.999339	1
ASNA1-201	696	G	1	3097	1	4	0	0	.	3103	0.998066	1
ASNA1-201	697	T	1	26	7	2757	0	0	.	2791	0.987818	1
ASNA1-201	698	C	0	2	3115	0	0	0	.	3117	0.999358	1
ASNA1-201	699	A	3129	0	4	0	0	0	.	3133	0.998723	1
ASNA1-201	700	T	0	4	4	3043	0	0	.	3051	0.997378	1
ASNA1-201	701	C	2	1	3212	0	0	0	.	3215	0.999067	1
ASNA1-201	702	C	1	0	3127	1	0	0	.	3129	0.999361	1
ASNA1-201	703	G	10	3193	1	5	0	0	.	3209	0.995014	1
ASNA1-201	704	C	2	0	3210	0	0	0	.	3212	0.999377	1
ASNA1-201	705	T	0	16	2	2863	0	0	.	2881	0.993752	1
ASNA1-201	706	C	0	0	3147	0	0	0	.	3147	1	1
ASNA1-201	707	A	3132	2	1	0	0	0	.	3135	0.999043	1
ASNA1-201	708	G	48	3304	34	14	0	0	.	3400	0.971765	1
ASNA1-201	709	T	0	23	2	3170	0	0	.	3195	0.992175	1
ASNA1-201	710	C	6	0	3511	1	0	0	.	3518	0.99801	1
ASNA1-201	711	A	3425	1	6	0	0	0	.	3432	0.99796	1
ASNA1-201	712	G	99	3690	40	46	0	0	.	3875	0.952258	1
ASNA1-201	713	C	1	3	3997	7	0	0	.	4008	0.997255	1
ASNA1-201	714	G	94	3925	1	8	0	0	.	4028	0.974429	1
ASNA1-201	715	A	4080	4	10	1	0	0	.	4095	0.996337	1
ASNA1-201	716	A	4018	2	6	0	0	0	.	4026	0.998013	1
ASNA1-201	717	C	15	19	3633	10	0	0	.	3677	0.988034	1
ASNA1-201	718	A	3707	2	2	1	0	0	.	3712	0.998653	1
ASNA1-201	719	G	50	3956	37	30	0	0	.	4073	0.971274	1
ASNA1-201	720	T	1	2	1	3793	0	0	.	3797	0.998947	1
ASNA1-201	721	T	1	13	3	4008	0	0	.	4025	0.995776	1
ASNA1-201	722	C	16	102	4096	15	0	0	.	4229	0.96855	1
ASNA1-201	723	A	4149	0	2	3	0	0	.	4154	0.998796	1
ASNA1-201	724	A	4031	3	6	0	0	0	.	4040	0.997772	1
ASNA1-201	725	G	10	3956	2	7	0	0	.	3975	0.99522	1
ASNA1-201	726	G	4	4031	0	4	0	0	.	4039	0.998019	1
ASNA1-201	727	A	3787	1	12	0	1	0	.	3801	0.996317	1
ASNA1-201	728	C	0	0	3845	14	0	0	.	3859	0.996372	1
ASNA1-201	729	C	5	0	3819	14	0	0	.	3838	0.99505	1
ASNA1-201	730	C	2	3	3878	7	0	0	.	3890	0.996915	1
ASNA1-201	731	T	1	3	1	3809	0	0	.	3814	0.998689	1
ASNA1-201	732	G	2	4038	0	4	0	0	.	4044	0.998516	1
ASNA1-201	733	A	4031	1	6	1	0	0	.	4039	0.998019	1
ASNA1-201	734	G	2	4093	0	3	0	0	.	4098	0.99878	1
ASNA1-201	735	C	1	1	4006	1	0	0	.	4009	0.999252	1
ASNA1-201	736	A	3995	0	3	0	0	0	.	3998	0.99925	1
ASNA1-201	737	G	0	4042	1	2	0	0	.	4045	0.999258	1
ASNA1-201	738	A	3994	2	6	2	0	0	.	4004	0.997502	1
ASNA1-201	739	C	0	0	4057	1	0	0	.	4058	0.999754	1
ASNA1-201	740	A	4058	0	2	1	0	0	.	4061	0.999261	1
ASNA1-201	741	A	4122	3	3	0	0	0	.	4128	0.998547	1
ASNA1-201	742	C	1	1	4213	1	0	0	.	4216	0.999288	1
ASNA1-201	743	T	0	0	9	4014	0	0	.	4023	0.997763	1
ASNA1-201	744	T	0	1	2	4003	0	0	.	4006	0.999251	1
ASNA1-201	745	T	0	6	2	4249	0	0	.	4257	0.998121	1
ASNA1-201	746	C	1	1	4247	0	0	0	.	4249	0.999529	1
ASNA1-201	747	A	4154	1	3	0	0	0	.	4158	0.999038	1
ASNA1-201	748	T	1	6	5	4181	0	0	.	4193	0.997138	1
ASNA1-201	749	C	1	3	3968	4	0	0	.	3976	0.997988	1
ASNA1-201	750	T	0	1	5	3823	0	0	.	3829	0.998433	1
ASNA1-201	751	G	0	4202	0	4	0	0	.	4206	0.999049	1
ASNA1-201	752	C	4	0	4230	2	0	0	.	4236	0.998584	1
ASNA1-201	753	G	1	4332	0	2	0	0	.	4335	0.999308	1
ASNA1-201	754	T	2	5	2	4248	0	0	.	4257	0.997886	1
ASNA1-201	755	A	4396	2	2	0	0	0	.	4400	0.999091	1
ASNA1-201	756	T	0	3	4	4314	0	0	.	4321	0.99838	1
ASNA1-201	757	G	2	4441	0	4	0	0	.	4447	0.998651	1
ASNA1-201	758	C	2	0	4422	0	0	0	.	4424	0.999548	1
ASNA1-201	759	A	4323	1	1	0	0	0	.	4325	0.999538	1
ASNA1-201	760	T	0	1	6	4260	0	0	.	4267	0.99836	1
ASNA1-201	761	T	1	1	4	4267	0	0	.	4273	0.998596	1
ASNA1-201	762	G	4	4428	0	7	0	0	.	4439	0.997522	1
ASNA1-201	763	C	4	0	4331	0	0	0	.	4335	0.999077	1
ASNA1-201	764	T	2	6	8	4185	0	0	.	4201	0.996191	1
ASNA1-201	765	G	0	4448	3	2	0	0	.	4453	0.998877	1
ASNA1-201	766	A	4995	4	10	0	0	0	.	5009	0.997205	1
ASNA1-201	767	G	8	5113	2	2	0	0	.	5125	0.997659	1
ASNA1-201	768	T	0	17	10	4526	0	0	.	4553	0.99407	1
ASNA1-201	769	T	1	12	4	5114	0	0	.	5131	0.996687	1
ASNA1-201	770	C	2	0	5198	1	0	0	.	5201	0.999423	1
ASNA1-201	771	C	3	0	5269	0	0	0	.	5272	0.999431	1
ASNA1-201	772	T	1	0	1	5002	0	0	.	5004	0.9996	1
ASNA1-201	773	G	11	5046	1	5	0	0	.	5063	0.996642	1
ASNA1-201	774	T	2	9	4	4628	0	0	.	4643	0.996769	1
ASNA1-201	775	C	7	0	5227	0	0	0	.	5234	0.998663	1
ASNA1-201	776	C	8	0	4953	2	0	0	.	4963	0.997985	1
ASNA1-201	777	C	5	1	5111	6	0	0	.	5123	0.997658	1
ASNA1-201	778	T	1	5	7	5018	0	0	.	5031	0.997416	1
ASNA1-201	779	G	4	5494	1	11	0	0	.	5510	0.997096	1
ASNA1-201	780	T	0	3	4	5364	0	0	.	5371	0.998697	1
ASNA1-201	781	A	5192	5	4	1	0	0	.	5202	0.998078	1
ASNA1-201	782	T	0	3	7	5193	0	0	.	5203	0.998078	1
ASNA1-201	783	G	2	5170	1	3	0	0	.	5176	0.998841	1
ASNA1-201	784	A	5139	2	5	4	0	0	.	5150	0.997864	1
ASNA1-201	785	G	0	5067	0	3	0	0	.	5070	0.999408	1
ASNA1-201	786	A	4889	0	11	0	0	0	.	4900	0.997755	1
ASNA1-201	787	C	3	0	4550	0	0	1	AG	4554	0.999122	1
ASNA1-201	788	A	4616	2	7	2	0	0	.	4627	0.997623	1
ASNA1-201	789	G	0	4583	2	4	0	0	.	4589	0.998693	1
ASNA1-201	790	A	4723	1	8	2	0	0	.	4734	0.997676	1
ASNA1-201	791	G	2	4682	0	1	0	0	.	4685	0.99936	1
ASNA1-201	792	A	4413	1	10	1	0	0	.	4425	0.997288	1
ASNA1-201	793	G	2	4506	0	3	0	0	.	4511	0.998892	1
ASNA1-201	794	G	2	4300	1	4	0	0	.	4307	0.998375	1
ASNA1-201	795	C	1	1	4264	2	0	0	.	4268	0.999063	1
ASNA1-201	796	T	0	5	7	3927	0	0	.	3939	0.996954	1
ASNA1-201	797	G	1	4266	1	3	0	0	.	4271	0.998829	1
ASNA1-201	798	A	4254	2	11	0	0	0	.	4267	0.996953	1
ASNA1-201	799	T	0	5	8	4248	0	0	.	4261	0.996949	1
ASNA1-201	800	C	3	1	4409	4	0	0	.	4417	0.998189	1
ASNA1-201	801	C	4	1	4229	4	0	0	.	4238	0.997876	1
ASNA1-201	802	A	4310	3	1	0	0	0	.	4314	0.999073	1
ASNA1-201	803	G	0	4277	0	3	0	0	.	4280	0.999299	1
ASNA1-201	804	G	1	4212	0	7	0	0	.	4220	0.998104	1
ASNA1-201	805	A	4250	0	7	0	0	0	.	4257	0.998356	1
ASNA1-201	806	G	0	4201	1	7	0	0	.	4209	0.998099	1
ASNA1-201	807	C	2	0	4142	0	0	0	.	4144	0.999517	1
ASNA1-201	808	T	0	7	1	3919	0	0	.	3927	0.997963	1
ASNA1-201	809	G	2	4140	1	3	0	0	.	4146	0.998553	1
ASNA1-201	810	G	11	4263	0	4	0	0	.	4278	0.996494	1
ASNA1-201	811	C	4	0	4300	4	0	0	.	4308	0.998143	1
ASNA1-201	812	C	9	0	4302	0	0	0	.	4311	0.997912	1
ASNA1-201	813	A	4290	0	1	0	0	0	.	4291	0.999767	1
ASNA1-201	814	A	4321	0	4	3	0	0	.	4328	0.998383	1
ASNA1-201	815	G	5	4343	3	2	0	0	.	4353	0.997703	1
ASNA1-201	816	T	0	4	0	4050	0	0	.	4054	0.999013	1
ASNA1-201	817	G	3	4297	0	0	0	0	.	4300	0.999302	1
ASNA1-201	818	C	2	2	4252	1	0	0	.	4257	0.998825	1
ASNA1-201	819	A	4341	0	2	0	1	0	.	4344	0.999309	1
ASNA1-201	820	A	4444	2	2	0	0	0	.	4448	0.999101	1
ASNA1-201	821	G	0	4540	1	6	0	0	.	4547	0.998461	1
ASNA1-201	822	A	4510	1	2	1	0	0	.	4514	0.999114	1
ASNA1-201	823	T	0	1	2	4136	0	0	.	4139	0.999275	1
ASNA1-201	824	T	0	4	5	4133	0	0	.	4142	0.997827	1
ASNA1-201	825	G	3	4115	1	1	0	0	.	4120	0.998786	1
ASNA1-201	826	A	3852	2	20	1	0	0	.	3875	0.994065	1
ASNA1-201	827	C	3	0	4116	5	0	0	.	4124	0.99806	1
ASNA1-201	828	A	3954	2	5	0	0	0	.	3961	0.998233	1
ASNA1-201	829	C	6	2	4007	1	0	0	.	4016	0.997759	1
ASNA1-201	830	A	3940	0	7	2	0	0	.	3949	0.997721	1
ASNA1-201	831	C	1	0	4045	0	0	0	.	4046	0.999753	1
ASNA1-201	832	A	4017	0	5	1	0	0	.	4023	0.998509	1
ASNA1-201	833	C	4	1	4284	1	0	0	.	4290	0.998601	1
ASNA1-201	834	A	4216	1	1	0	0	0	.	4218	0.999526	1
ASNA1-201	835	A	4491	1	2	1	0	0	.	4495	0.99911	1
ASNA1-201	836	T	2	0	5	4024	0	0	.	4031	0.998263	1
ASNA1-201	837	A	4369	3	1	0	0	0	.	4373	0.999085	1
ASNA1-201	838	T	0	1	3	4009	0	0	.	4013	0.999003	1
ASNA1-201	839	A	4318	0	3	0	0	0	.	4321	0.999306	1
ASNA1-201	840	A	4279	1	3	0	0	0	.	4283	0.999066	1
ASNA1-201	841	T	1	0	8	3511	0	0	.	3520	0.997443	1
ASNA1-201	842	T	0	2	1	3417	0	0	.	3420	0.999123	1
ASNA1-201	843	G	2	3046	2	1	0	0	.	3051	0.998361	1
ASNA1-201	844	T	0	3	4	2957	0	0	.	2964	0.997638	1
ASNA1-201	845	C	4	0	3163	0	0	0	.	3167	0.998737	1
ASNA1-201	846	A	3016	2	4	0	0	0	.	3022	0.998015	1
ASNA1-201	847	A	2781	1	10	0	0	0	.	2792	0.99606	1
ASNA1-201	848	C	2	0	3135	0	1	0	.	3138	0.999044	1
ASNA1-201	849	C	3	1	2911	1	0	0	.	2916	0.998285	1
ASNA1-201	850	A	2837	3	5	0	0	0	.	2845	0.997188	1
ASNA1-201	851	G	0	3035	1	2	0	0	.	3038	0.999013	1
ASNA1-201	852	C	4	0	3023	0	0	0	.	3027	0.998679	1
ASNA1-201	853	T	0	9	0	2894	0	0	.	2903	0.9969	1
ASNA1-201	854	C	5	0	2827	1	0	0	.	2833	0.997882	1
ASNA1-201	855	G	0	2831	0	1	0	0	.	2832	0.999647	1
ASNA1-201	856	T	0	12	7	2609	0	0	.	2628	0.99277	1
ASNA1-201	857	C	2	2	2831	0	0	0	.	2835	0.998589	1
ASNA1-201	858	T	1	3	0	2670	0	0	.	2674	0.998504	1
ASNA1-201	859	T	1	1	4	2807	0	0	.	2813	0.997867	1
ASNA1-201	860	C	3	0	2868	0	1	0	.	2872	0.998607	1
ASNA1-201	861	C	4	0	2900	0	0	1	AG	2905	0.998279	1
ASNA1-201	862	C	4	1	2863	1	0	0	.	2869	0.997909	1
ASNA1-201	863	C	2	0	2854	1	0	0	.	2857	0.99895	1
ASNA1-201	864	G	2	2887	0	3	0	0	.	2892	0.998271	1
ASNA1-201	865	A	2406	0	31	0	0	1	C	2438	0.986874	1
ASNA1-201	866	C	3	1	3039	0	0	0	.	3043	0.998686	1
ASNA1-201	867	C	2	0	2958	0	0	0	.	2960	0.999324	1
ASNA1-201	868	C	3	0	2880	1	0	0	.	2884	0.998613	1
ASNA1-201	869	C	2	1	2931	1	0	0	.	2935	0.998637	1
ASNA1-201	870	G	2	2849	0	3	1	0	.	2855	0.997898	1
ASNA1-201	871	A	2850	1	2	0	1	0	.	2854	0.998598	1
ASNA1-201	872	G	0	2958	0	4	0	0	.	2962	0.99865	1
ASNA1-201	873	A	2696	1	7	0	0	0	.	2704	0.997041	1
ASNA1-201	874	A	2794	2	7	0	0	0	.	2803	0.996789	1
ASNA1-201	875	G	4	3139	2	2	0	0	.	3147	0.997458	1
ASNA1-201	876	C	3	0	3282	6	0	0	.	3291	0.997265	1
ASNA1-201	877	C	2	0	3180	0	0	0	.	3182	0.999371	1
ASNA1-201	878	C	1	0	3185	1	0	0	.	3187	0.999372	1
ASNA1-201	879	T	0	5	0	3040	1	0	.	3046	0.99803	1
ASNA1-201	880	G	4	3166	1	6	0	0	.	3177	0.996538	1
ASNA1-201	881	C	5	0	3229	9	0	0	.	3243	0.995683	1
ASNA1-201	882	A	3248	1	2	2	0	0	.	3253	0.998463	1
ASNA1-201	883	A	3264	2	2	0	0	0	.	3268	0.998776	1
ASNA1-201	884	G	3	3285	1	6	0	0	.	3295	0.996965	1
ASNA1-201	885	A	3275	1	6	0	0	0	.	3282	0.997867	1
ASNA1-201	886	T	2	13	0	3186	0	0	.	3201	0.995314	1
ASNA1-201	887	G	6	3205	0	2	0	0	.	3213	0.99751	1
ASNA1-201	888	T	0	14	3	2977	0	0	.	2994	0.994322	1
ASNA1-201	889	G	1	3216	1	4	0	0	.	3222	0.998138	1
ASNA1-201	890	T	1	20	1	2798	0	0	.	2820	0.992199	1
ASNA1-201	891	G	1	3232	0	3	0	0	.	3236	0.998764	1
ASNA1-201	892	A	2992	1	4	0	1	0	.	2998	0.997999	1
ASNA1-201	893	G	4	3157	1	1	0	0	.	3163	0.998103	1
ASNA1-201	894	G	5	3145	0	0	0	0	.	3150	0.998413	1
ASNA1-201	895	C	3	0	3067	3	0	0	.	3073	0.998048	1
ASNA1-201	896	C	4	1	2961	1	0	0	.	2967	0.997978	1
ASNA1-201	897	C	2	2	2915	0	0	0	.	2919	0.99863	1
ASNA1-201	898	G	2	3039	1	5	0	0	.	3047	0.997374	1
ASNA1-201	899	T	1	28	6	2622	0	0	.	2657	0.986827	1
ASNA1-201	900	C	0	1	3110	0	0	0	.	3111	0.999679	1
ASNA1-201	901	A	2963	0	5	0	0	0	.	2968	0.998315	1
ASNA1-201	902	C	0	8	3027	2	0	0	.	3037	0.996707	1
ASNA1-201	903	A	2811	3	2	0	0	0	.	2816	0.998224	1
ASNA1-201	904	A	2832	3	1	1	0	0	.	2837	0.998238	1
ASNA1-201	905	G	2	2875	0	4	1	0	.	2882	0.997571	1
ASNA1-201	906	A	2877	0	10	0	0	0	.	2887	0.996536	1
ASNA1-201	907	T	0	4	2	2733	0	0	.	2739	0.997809	1
ASNA1-201	908	C	1	4	2822	3	0	0	.	2830	0.997173	1
ASNA1-201	909	C	0	0	2625	0	0	0	.	2625	1	1
ASNA1-201	910	A	2561	1	3	1	0	0	.	2566	0.998051	1
ASNA1-201	911	G	1	2542	2	5	0	0	.	2550	0.996863	1
ASNA1-201	912	G	5	2701	1	5	0	0	.	2712	0.995944	1
ASNA1-201	913	C	1	0	2880	3	0	0	.	2884	0.998613	1
ASNA1-201	914	C	1	0	2772	0	0	0	.	2773	0.999639	1
ASNA1-201	915	A	2813	1	1	0	0	0	.	2815	0.99929	1
ASNA1-201	916	A	2824	1	2	1	0	0	.	2828	0.998586	1
ASNA1-201	917	G	5	2851	1	8	0	0	.	2865	0.995113	1
ASNA1-201	918	T	0	2	2	2761	0	0	.	2765	0.998553	1
ASNA1-201	919	A	2765	3	2	2	0	0	.	2772	0.997475	1
ASNA1-201	920	T	0	11	3	2653	0	0	.	2667	0.994751	1
ASNA1-201	921	C	3	5	2770	11	0	0	.	2789	0.993188	1
ASNA1-201	922	T	2	1	0	2695	0	0	.	2698	0.998888	1
ASNA1-201	923	G	5	2728	2	4	0	0	.	2739	0.995984	1
ASNA1-201	924	G	1	2846	0	5	0	0	.	2852	0.997896	1
ASNA1-201	925	A	2773	2	5	0	0	0	.	2780	0.997482	1
ASNA1-201	926	C	0	1	2733	0	0	0	.	2734	0.999634	1
ASNA1-201	927	C	1	0	2642	1	0	0	.	2644	0.999244	1
ASNA1-201	928	A	2704	1	0	0	0	0	.	2705	0.99963	1
ASNA1-201	929	G	3	2683	2	4	0	1	GT	2693	0.996287	1
ASNA1-201	930	A	2803	0	4	0	0	0	.	2807	0.998575	1
ASNA1-201	931	T	0	5	0	2617	0	0	.	2622	0.998093	1
ASNA1-201	932	G	1	2791	0	4	0	0	.	2796	0.998212	1
ASNA1-201	933	G	1	2784	0	0	0	0	.	2785	0.999641	1
ASNA1-201	934	A	2754	1	2	0	0	0	.	2757	0.998912	1
ASNA1-201	935	G	0	2722	0	3	1	0	.	2726	0.998533	1
ASNA1-201	936	G	0	2676	0	3	0	0	.	2679	0.99888	1
ASNA1-201	937	A	2608	1	9	0	0	0	.	2618	0.99618	1
ASNA1-201	938	C	1	0	2779	1	0	0	.	2781	0.999281	1
ASNA1-201	939	C	0	0	2691	3	0	0	.	2694	0.998886	1
ASNA1-201	940	T	1	4	2	2618	0	0	.	2625	0.997333	1
ASNA1-201	941	G	1	2769	0	4	0	0	.	2774	0.998198	1
ASNA1-201	942	T	0	4	7	2665	0	0	.	2676	0.995889	1
ASNA1-201	943	A	2704	0	2	0	0	0	.	2706	0.999261	1
ASNA1-201	944	T	0	3	3	2639	0	0	.	2645	0.997732	1
ASNA1-201	945	G	1	2665	1	1	0	0	.	2668	0.998876	1
ASNA1-201	946	A	2599	0	1	4	0	0	.	2604	0.99808	1
ASNA1-201	947	A	2519	0	4	0	0	0	.	2523	0.998415	1
ASNA1-201	948	G	2	2537	3	1	0	0	.	2543	0.997641	1
ASNA1-201	949	A	2216	1	4	0	0	0	.	2221	0.997749	1
ASNA1-201	950	C	1	2	2212	0	0	0	.	2215	0.998646	1
ASNA1-201	951	T	2	0	5	1942	0	0	.	1949	0.996408	1
ASNA1-201	952	T	1	2	9	2062	0	0	.	2074	0.994214	1
ASNA1-201	953	C	0	0	2248	0	0	0	.	2248	1	1
ASNA1-201	954	C	2	0	2227	0	0	0	.	2229	0.999103	1
ASNA1-201	955	A	2133	1	1	0	0	0	.	2135	0.999063	1
ASNA1-201	956	C	3	0	2158	0	0	0	.	2161	0.998612	1
ASNA1-201	957	A	2102	1	1	1	0	0	.	2105	0.998575	1
ASNA1-201	958	T	1	3	3	1880	0	0	.	1887	0.99629	1
ASNA1-201	959	C	5	1	2069	0	0	0	.	2075	0.997108	1
ASNA1-201	960	G	1	1977	1	1	0	0	.	1980	0.998485	1
ASNA1-201	961	T	0	9	1	1787	0	0	.	1797	0.994435	1
ASNA1-201	962	G	0	2005	1	1	0	0	.	2007	0.999003	1
ASNA1-201	963	A	2079	0	1	0	0	0	.	2080	0.999519	1
ASNA1-201	964	A	2021	0	5	0	0	0	.	2026	0.997532	1
ASNA1-201	965	G	1	2118	0	3	0	0	.	2122	0.998115	1
ASNA1-201	966	C	1	0	2085	1	0	0	.	2087	0.999042	1
ASNA1-201	967	T	0	3	1	1867	0	0	.	1871	0.997862	1
ASNA1-201	968	G	0	2147	0	4	0	0	.	2151	0.99814	1
ASNA1-201	969	C	1	0	2156	1	0	0	.	2158	0.999073	1
ASNA1-201	970	C	1	1	2253	0	0	0	.	2255	0.999113	1
ASNA1-201	971	G	1	2228	0	0	0	0	.	2229	0.999551	1
ASNA1-201	972	C	2	0	2279	1	0	0	.	2282	0.998685	1
ASNA1-201	973	T	0	5	4	2056	0	0	.	2065	0.995642	1
ASNA1-201	974	G	2	2263	1	4	0	0	.	2270	0.996916	1
ASNA1-201	975	T	0	3	0	2029	0	0	.	2032	0.998524	1
ASNA1-201	976	T	0	1	1	2097	0	0	.	2099	0.999047	1
ASNA1-201	977	A	2261	0	2	0	0	0	.	2263	0.999116	1
ASNA1-201	978	C	1	0	2335	3	1	0	.	2340	0.997863	1
ASNA1-201	979	C	6	0	2366	4	0	0	.	2376	0.995791	1
ASNA1-201	980	C	7	3	2172	0	0	0	.	2182	0.995417	1
ASNA1-201	981	C	0	0	2169	1	0	0	.	2170	0.999539	1
ASNA1-201	982	A	1968	0	4	0	0	0	.	1972	0.997972	1
ASNA1-201	983	T	0	3	2	2014	0	0	.	2019	0.997524	1
ASNA1-201	984	G	0	2062	0	6	0	0	.	2068	0.997099	1
ASNA1-201	985	A	1989	1	8	0	0	0	.	1998	0.995495	1
ASNA1-201	986	G	2	2031	0	2	0	0	.	2035	0.998034	1
ASNA1-201	987	G	0	1959	1	1	0	0	.	1961	0.99898	1
ASNA1-201	988	T	0	13	3	1489	0	0	.	1505	0.989369	1
ASNA1-201	989	G	5	2204	1	0	0	0	.	2210	0.997285	1
ASNA1-201	990	C	0	21	2083	2	0	1	G	2107	0.988609	1
ASNA1-201	991	G	0	2183	5	0	20	0	.	2208	0.988678	1
ASNA1-201	992	G	1	2256	0	2	0	0	.	2259	0.998672	1
ASNA1-201	993	G	0	2211	0	0	0	0	.	2211	1	1
ASNA1-201	994	G	0	2183	0	4	0	0	.	2187	0.998171	1
ASNA1-201	995	G	1	2174	0	2	0	0	.	2177	0.998622	1
ASNA1-201	996	G	2	2141	3	0	0	0	.	2146	0.99767	1
ASNA1-201	997	C	0	0	2207	1	0	0	.	2208	0.999547	1
ASNA1-201	998	A	2210	0	3	0	0	0	.	2213	0.998644	1
ASNA1-201	999	G	2	2218	0	1	0	0	.	2221	0.998649	1
ASNA1-201	1000	A	2276	1	2	0	0	0	.	2279	0.998684	1
ASNA1-201	1001	C	0	1	2248	1	0	0	.	2250	0.999111	1
ASNA1-201	1002	A	2115	0	0	0	0	0	.	2115	1	1
ASNA1-201	1003	A	2076	0	2	0	0	0	.	2078	0.999038	1
ASNA1-201	1004	G	1	1915	0	3	0	0	.	1919	0.997916	1
ASNA1-201	1005	G	0	2015	2	1	0	0	.	2018	0.998513	1
ASNA1-201	1006	T	0	28	3	1625	0	0	.	1656	0.98128	1
ASNA1-201	1007	C	2	1	2078	0	1	0	.	2082	0.998079	1
ASNA1-201	1008	A	2102	0	1	2	0	0	.	2105	0.998575	1
ASNA1-201	1009	A	2097	0	1	0	0	0	.	2098	0.999523	1
ASNA1-201	1010	C	0	0	2057	0	1	0	.	2058	0.999514	1
ASNA1-201	1011	A	2023	0	7	1	0	0	.	2031	0.996061	1
ASNA1-201	1012	C	2	0	1958	3	1	0	.	1964	0.996945	1
ASNA1-201	1013	C	1	0	1842	4	0	0	.	1847	0.997293	1
ASNA1-201	1014	T	0	0	1	1824	0	0	.	1825	0.999452	1
ASNA1-201	1015	T	0	0	0	1831	0	0	.	1831	1	1
ASNA1-201	1016	C	1	0	1828	1	0	0	.	1830	0.998907	1
ASNA1-201	1017	T	1	2	1	1777	0	0	.	1781	0.997754	1
ASNA1-201	1018	C	0	0	1752	0	0	0	.	1752	1	1
ASNA1-201	1019	G	1	1798	0	1	0	0	.	1800	0.998889	1
ASNA1-201	1020	G	1	1799	1	1	0	0	.	1802	0.998335	1
ASNA1-201	1021	C	1	0	1834	1	1	0	.	1837	0.998367	1
ASNA1-201	1022	C	0	0	1815	0	0	0	.	1815	1	1
ASNA1-201	1023	C	0	1	1762	1	0	0	.	1764	0.998866	1
ASNA1-201	1024	T	1	5	0	1612	0	0	.	1618	0.996292	1
ASNA1-201	1025	C	0	0	1800	1	0	0	.	1801	0.999445	1
ASNA1-201	1026	C	1	0	1789	0	0	0	.	1790	0.999441	1
ASNA1-201	1027	T	0	2	0	1663	0	0	.	1665	0.998799	1
ASNA1-201	1028	C	0	0	1770	0	0	0	.	1770	1	1
ASNA1-201	1029	C	0	0	1780	0	0	0	.	1780	1	1
ASNA1-201	1030	T	1	1	2	1722	0	0	.	1726	0.997683	1
ASNA1-201	1031	G	2	1768	0	3	0	0	.	1773	0.99718	1
ASNA1-201	1032	G	0	1731	0	2	0	0	.	1733	0.998846	1
ASNA1-201	1033	A	1697	0	4	0	0	0	.	1701	0.997648	1
ASNA1-201	1034	G	0	1676	1	1	0	0	.	1678	0.998808	1
ASNA1-201	1035	C	0	0	1639	1	0	0	.	1640	0.99939	1
ASNA1-201	1036	C	0	0	1587	0	0	0	.	1587	1	1
ASNA1-201	1037	C	0	0	1597	0	0	0	.	1597	1	1
ASNA1-201	1038	T	1	0	0	1516	0	0	.	1517	0.999341	1
ASNA1-201	1039	A	1603	2	1	0	0	0	.	1606	0.998132	1
ASNA1-201	1040	C	0	0	1556	1	0	0	.	1557	0.999358	1
ASNA1-201	1041	A	1540	0	1	0	0	0	.	1541	0.999351	1
ASNA1-201	1042	A	1454	1	4	0	0	0	.	1459	0.996573	1
ASNA1-201	1043	G	1	1408	4	0	1	0	.	1414	0.995757	1
ASNA1-201	1044	C	1	0	1467	0	3	0	.	1471	0.997281	1
ASNA1-201	1045	C	0	0	1336	0	0	0	.	1336	1	1
ASNA1-201	1046	C	2	0	1328	3	0	0	.	1333	0.996249	1
ASNA1-201	1047	C	1	0	1319	0	0	0	.	1320	0.999242	1
ASNA1-201	1048	C	1	0	1302	0	0	0	.	1303	0.999233	1
ASNA1-201	1049	C	0	0	1309	1	0	0	.	1310	0.999237	1
ASNA1-201	1050	A	1341	2	1	0	0	0	.	1344	0.997768	1
ASNA1-201	1051	G	1	1281	0	0	0	0	.	1282	0.99922	1
ASNA1-201	1052	T	0	5	1	1100	0	0	.	1106	0.994575	1
ASNA1-201	1053	G	0	1240	1	2	0	0	.	1243	0.997586	1
ASNA1-201	1054	C	1	0	1115	0	1	0	.	1117	0.998209	1
ASNA1-201	1055	C	1	0	1128	0	0	0	.	1129	0.999114	1
ASNA1-201	1056	C	2	0	1095	0	0	0	.	1097	0.998177	1
ASNA1-201	1057	A	1123	1	1	0	0	0	.	1125	0.998222	1
ASNA1-201	1058	G	0	1107	0	0	0	0	.	1107	1	1
ASNA1-201	1059	T	0	1	1	948	0	0	.	950	0.997895	1
ASNA1-201	1060	A	981	1	0	0	0	0	.	982	0.998982	1
ASNA1-201	1061	G	2	829	0	0	0	0	.	831	0.997593	1
ASNA1-201	1062	C	0	0	847	1	0	0	.	848	0.998821	1
ASNA1-201	1063	A	855	0	0	1	0	0	.	856	0.998832	1
ASNA1-201	1064	C	0	0	653	0	0	0	.	653	1	1
ASNA1-201	1065	A	655	0	0	0	0	0	.	655	1	1
ASNA1-201	1066	G	0	569	0	0	0	0	.	569	1	1
ASNA1-201	1067	C	0	0	534	1	0	0	.	535	0.998131	1
ASNA1-201	1068	T	1	1	0	501	0	0	.	503	0.996024	1
ASNA1-201	1069	G	0	501	0	2	0	0	.	503	0.996024	1
ASNA1-201	86	G	1	2	0	0	0	0	.	3	0.666667	0
ASNA1-201	87	G	0	23	0	0	0	0	.	23	1	0
ASNA1-201	1070	C	0	0	493	0	0	0	.	493	1	0
ASNA1-201	1071	C	0	0	489	1	0	0	.	490	0.997959	0
ASNA1-201	1072	A	481	0	0	0	0	0	.	481	1	0
ASNA1-201	1073	G	0	465	1	0	0	0	.	466	0.997854	0
ASNA1-201	1074	C	3	0	454	0	1	0	.	458	0.991266	0
ASNA1-201	1075	C	0	1	443	0	0	0	.	444	0.997748	0
ASNA1-201	1076	C	0	0	429	0	0	0	.	429	1	0
ASNA1-201	1077	C	0	0	395	0	0	0	.	395	1	0
ASNA1-201	1078	A	412	0	0	0	0	0	.	412	1	0
ASNA1-201	1079	A	389	0	1	0	0	0	.	390	0.997436	0
ASNA1-201	1080	C	0	0	391	0	0	0	.	391	1	0
ASNA1-201	1081	C	0	0	380	0	0	0	.	380	1	0
ASNA1-201	1082	G	0	367	0	0	0	0	.	367	1	0
ASNA1-201	1083	C	0	0	362	0	0	0	.	362	1	0
ASNA1-201	1084	T	0	1	0	326	0	0	.	327	0.996942	0
ASNA1-201	1085	G	0	365	0	0	0	0	.	365	1	0
ASNA1-201	1086	C	0	0	354	1	0	0	.	355	0.997183	0
ASNA1-201	1087	C	0	0	349	0	0	0	.	349	1	0
ASNA1-201	1088	A	360	1	0	0	0	0	.	361	0.99723	0
ASNA1-201	1089	T	0	0	3	312	0	0	.	315	0.990476	0
ASNA1-201	1090	T	0	0	0	310	0	0	.	310	1	0
ASNA1-201	1091	T	0	0	0	324	0	0	.	324	1	0
ASNA1-201	1092	C	0	0	330	0	0	0	.	330	1	0
ASNA1-201	1093	A	305	0	0	0	0	0	.	305	1	0
ASNA1-201	1094	C	0	0	305	0	0	0	.	305	1	0
ASNA1-201	1095	A	294	0	1	0	0	0	.	295	0.99661	0
ASNA1-201	1096	C	0	0	229	0	0	0	.	229	1	0
ASNA1-201	1097	T	0	1	0	213	0	0	.	214	0.995327	0
ASNA1-201	1098	C	0	0	222	0	0	0	.	222	1	0
ASNA1-201	1099	A	216	0	0	0	0	0	.	216	1	0
ASNA1-201	1100	C	0	0	211	0	0	0	.	211	1	0
ASNA1-201	1101	C	3	0	188	0	0	0	.	191	0.984293	0
ASNA1-201	1102	C	0	0	167	0	0	0	.	167	1	0
ASNA1-201	1103	T	0	0	0	157	0	0	.	157	1	0
ASNA1-201	1104	C	4	0	134	0	0	0	.	138	0.971014	0
ASNA1-201	1105	C	0	0	132	0	0	0	.	132	1	0
ASNA1-201	1106	A	125	0	0	0	0	0	.	125	1	0
ASNA1-201	1107	C	0	0	84	1	0	0	.	85	0.988235	0
ASNA1-201	1108	C	0	0	39	0	0	0	.	39	1	0
ASNA1-201	1109	C	1	0	24	0	0	0	.	25	0.96	0
ASNA1-201	1110	T	0	0	0	21	0	0	.	21	1	0
ASNA1-201	1111	C	0	0	28	0	0	0	.	28	1	0
ASNA1-201	1112	C	0	0	24	0	0	0	.	24	1	0
ASNA1-201	1113	C	0	0	22	0	0	0	.	22	1	0
ASNA1-201	1114	C	0	0	22	0	0	0	.	22	1	0
ASNA1-201	1115	A	17	0	0	0	0	0	.	17	1	0
ASNA1-201	1116	C	0	0	21	0	0	0	.	21	1	0
ASNA1-201	1117	C	0	0	21	0	0	0	.	21	1	0
ASNA1-201	1118	C	0	0	21	0	0	0	.	21	1	0
ASNA1-201	1119	C	0	0	22	0	0	0	.	22	1	0
ASNA1-201	1120	C	0	0	21	0	0	0	.	21	1	0
ASNA1-201	1121	T	0	0	0	19	0	0	.	19	1	0
ASNA1-201	1122	C	0	0	22	0	0	0	.	22	1	0
ASNA1-201	1123	G	0	22	0	0	0	0	.	22	1	0
ASNA1-201	1124	G	0	24	0	0	0	0	.	24	1	0
ASNA1-201	1125	G	0	25	0	0	0	0	.	25	1	0
ASNA1-201	1126	G	0	23	0	0	0	0	.	23	1	0
ASNA1-201	1127	C	0	0	25	0	0	0	.	25	1	0
ASNA1-201	1128	A	24	0	0	0	0	0	.	24	1	0
ASNA1-201	1129	G	0	25	0	0	0	0	.	25	1	0
ASNA1-201	1130	A	26	0	0	0	0	0	.	26	1	0
ASNA1-201	1131	G	0	28	0	0	0	0	.	28	1	0
ASNA1-201	1132	T	0	0	0	26	0	0	.	26	1	0
ASNA1-201	1133	T	0	0	0	27	0	0	.	27	1	0
ASNA1-201	1134	T	0	0	0	27	0	0	.	27	1	0
ASNA1-201	1135	G	0	31	0	0	0	0	.	31	1	0
ASNA1-201	1136	C	0	0	29	0	0	0	.	29	1	0
ASNA1-201	1137	A	29	0	0	0	0	0	.	29	1	0
ASNA1-201	1138	C	1	0	27	0	0	0	.	28	0.964286	0
ASNA1-201	1139	A	30	1	0	0	0	0	.	31	0.967742	0
ASNA1-201	1140	A	29	0	0	0	0	0	.	29	1	0
ASNA1-201	1141	A	33	1	0	0	0	0	.	34	0.970588	0
ASNA1-201	1142	G	0	34	0	0	0	0	.	34	1	0
ASNA1-201	1143	T	0	0	0	34	0	0	.	34	1	0
ASNA1-201	1144	C	0	0	36	0	0	0	.	36	1	0
ASNA1-201	1145	C	0	0	34	0	0	0	.	34	1	0
ASNA1-201	1146	C	0	0	38	0	0	0	.	38	1	0
ASNA1-201	1147	C	0	0	39	0	0	0	.	39	1	0
ASNA1-201	1148	C	0	0	41	0	0	0	.	41	1	0
ASNA1-201	1149	C	0	0	56	0	0	0	.	56	1	0
ASNA1-201	1150	C	0	0	57	0	0	0	.	57	1	0
ASNA1-201	1151	A	58	0	0	0	0	0	.	58	1	0
ASNA1-201	1152	T	0	0	0	49	0	0	.	49	1	0
ASNA1-201	1153	A	56	0	0	0	0	0	.	56	1	0
ASNA1-201	1154	A	63	0	0	0	0	0	.	63	1	0
ASNA1-201	1155	T	0	0	1	57	0	0	.	58	0.982759	0
ASNA1-201	1156	A	63	0	0	0	0	0	.	63	1	0
ASNA1-201	1157	C	0	0	63	0	0	0	.	63	1	0
ASNA1-201	1158	A	57	0	0	0	0	0	.	57	1	0
ASNA1-201	1159	G	0	61	0	0	0	0	.	61	1	0
ASNA1-201	1160	G	0	61	0	0	0	0	.	61	1	0
ASNA1-201	1161	G	0	66	0	0	0	0	.	66	1	0
ASNA1-201	1162	G	0	65	0	0	0	0	.	65	1	0
ASNA1-201	1163	G	0	63	0	0	0	0	.	63	1	0
ASNA1-201	1164	A	57	0	0	0	0	0	.	57	1	0
ASNA1-201	1165	G	0	65	0	0	0	0	.	65	1	0
ASNA1-201	1166	C	0	0	66	0	0	0	.	66	1	0
ASNA1-201	1167	C	0	0	66	0	0	0	.	66	1	0
ASNA1-201	1168	A	66	0	0	0	0	0	.	66	1	0
ASNA1-201	1169	C	0	0	66	0	0	0	.	66	1	0
ASNA1-201	1170	T	0	0	0	64	0	0	.	64	1	0
ASNA1-201	1171	T	0	0	0	57	0	0	.	57	1	0
ASNA1-201	1172	G	0	60	0	0	0	0	.	60	1	0
ASNA1-201	1173	G	0	62	0	0	0	0	.	62	1	0
ASNA1-201	1174	G	0	65	0	0	0	0	.	65	1	0
ASNA1-201	1175	C	0	0	56	0	0	0	.	56	1	0
ASNA1-201	1176	A	59	0	0	0	0	0	.	59	1	0
ASNA1-201	1177	G	0	58	0	0	0	0	.	58	1	0
ASNA1-201	1178	G	0	58	1	0	0	0	.	59	0.983051	0
ASNA1-201	1179	A	56	0	0	0	0	0	.	56	1	0
ASNA1-201	1180	G	0	60	0	0	0	0	.	60	1	0
ASNA1-201	1181	G	0	54	0	0	0	0	.	54	1	0
ASNA1-201	1182	C	0	0	56	0	0	0	.	56	1	0
ASNA1-201	1183	A	54	0	0	0	0	0	.	54	1	0
ASNA1-201	1184	G	0	57	0	0	0	0	.	57	1	0
ASNA1-201	1185	G	0	55	0	0	0	0	.	55	1	0
ASNA1-201	1186	G	0	48	0	0	0	0	.	48	1	0
ASNA1-201	1187	A	45	0	0	0	0	0	.	45	1	0
ASNA1-201	1188	G	0	41	0	0	0	0	.	41	1	0
ASNA1-201	1189	G	0	39	0	0	0	0	.	39	1	0
ASNA1-201	1190	G	0	37	0	0	0	0	.	37	1	0
ASNA1-201	1191	G	0	40	0	0	0	0	.	40	1	0
ASNA1-201	1192	T	0	0	0	37	0	0	.	37	1	0
ASNA1-201	1193	C	0	0	40	0	0	0	.	40	1	0
ASNA1-201	1194	C	0	0	38	0	0	0	.	38	1	0
ASNA1-201	1195	A	40	0	0	0	0	0	.	40	1	0
ASNA1-201	1196	T	0	0	0	35	0	0	.	35	1	0
ASNA1-201	1197	T	0	0	0	41	0	0	.	41	1	0
ASNA1-201	1198	C	0	0	32	0	0	0	.	32	1	0
ASNA1-201	1199	C	0	0	23	0	0	0	.	23	1	0
ASNA1-201	1200	C	0	1	26	0	0	0	.	27	0.962963	0
ASNA1-201	1201	C	0	0	25	0	0	0	.	25	1	0
ASNA1-201	1202	C	0	0	24	0	0	0	.	24	1	0
ASNA1-201	1203	T	0	0	0	22	0	0	.	22	1	0
ASNA1-201	1204	G	0	24	0	0	0	0	.	24	1	0
ASNA1-201	1205	G	0	23	0	0	0	0	.	23	1	0
ASNA1-201	1206	T	0	0	0	20	0	0	.	20	1	0
ASNA1-201	1207	G	0	19	0	0	0	0	.	19	1	0
ASNA1-201	1208	G	0	20	0	0	0	0	.	20	1	0
ASNA1-201	1209	G	0	21	0	0	0	0	.	21	1	0
ASNA1-201	1210	G	0	20	0	0	0	0	.	20	1	0
ASNA1-201	1211	C	0	0	15	0	0	0	.	15	1	0
ASNA1-201	1212	T	0	0	0	12	0	0	.	12	1	0
ASNA1-201	1213	G	0	12	0	0	0	0	.	12	1	0
ASNA1-201	1214	G	0	12	0	0	0	0	.	12	1	0
ASNA1-201	1215	T	0	0	0	11	0	0	.	11	1	0
ASNA1-201	1216	G	0	8	0	0	0	0	.	8	1	0
ASNA1-201	1217	G	2	4	0	0	0	0	.	6	0.666667	0
ASNA1-201	1218	G	0	7	0	0	0	0	.	7	1	0
ASNA1-201	1219	G	0	5	0	0	0	0	.	5	1	0
ASNA1-201	1220	A	6	0	0	0	0	0	.	6	1	0
ASNA1-201	1221	G	0	4	0	0	0	0	.	4	1	0
ASNA1-201	1222	C	0	0	1	0	0	0	.	1	1	0
ASNA1-201	1223	T	0	0	0	1	0	0	.	1	1	0
ASNA1-201	1224	G	0	1	0	0	0	0	.	1	1	0
ASNA1-201	1225	T	0	0	0	1	0	0	.	1	1	0
ASNA1-201	1228	T	0	0	1	0	0	0	.	1	0	0
ASNA1-201	1229	T	0	0	0	1	0	0	.	1	1	0

## Sheet: Replicate 2
CHR	bp	REF	A	G	C	T	del	ins	inserted	Depth	%_REF	Depth>500?
ASNA1-201	460	C	9	0	2247	115	0	0	.	2371	0.947701	1
ASNA1-201	712	G	38	2144	34	23	0	0	.	2239	0.95757	1
ASNA1-201	455	C	19	2	2315	73	0	0	.	2409	0.96098	1
ASNA1-201	326	G	19	1899	37	10	0	0	.	1965	0.966412	1
ASNA1-201	722	C	7	66	2336	8	0	0	.	2417	0.966487	1
ASNA1-201	235	A	1186	2	36	0	0	0	.	1224	0.968954	1
ASNA1-201	454	G	11	2501	38	25	0	0	.	2575	0.971262	1
ASNA1-201	165	A	1176	0	30	1	0	0	.	1207	0.974316	1
ASNA1-201	1006	T	0	22	0	853	0	0	.	875	0.974857	1
ASNA1-201	714	G	48	2292	2	1	0	0	.	2343	0.978233	1
ASNA1-201	719	G	34	2257	5	8	0	0	.	2304	0.979601	1
ASNA1-201	168	A	1173	0	22	0	0	0	.	1195	0.98159	1
ASNA1-201	708	G	17	1932	11	8	0	0	.	1968	0.981707	1
ASNA1-201	331	A	1628	1	27	0	0	0	.	1656	0.983092	1
ASNA1-201	265	A	1612	1	24	1	0	0	.	1638	0.984127	1
ASNA1-201	452	G	25	2404	0	12	0	0	.	2441	0.984842	1
ASNA1-201	991	G	1	1088	3	0	12	0	.	1104	0.985507	1
ASNA1-201	988	T	1	6	2	690	0	0	.	699	0.987124	1
ASNA1-201	717	C	10	8	2110	7	0	0	.	2135	0.98829	1
ASNA1-201	899	T	0	14	1	1292	0	0	.	1307	0.988523	1
ASNA1-201	990	C	0	12	1034	0	0	0	.	1046	0.988528	1
ASNA1-201	697	T	1	17	1	1655	0	0	.	1674	0.98865	1
ASNA1-201	555	A	1927	6	16	0	0	0	.	1949	0.988712	1
ASNA1-201	466	T	0	13	12	2194	0	0	.	2219	0.988734	1
ASNA1-201	636	C	3	4	1564	10	0	0	.	1581	0.989247	1
ASNA1-201	768	T	3	15	7	2319	0	0	.	2344	0.989334	1
ASNA1-201	465	G	1	2567	16	9	0	0	.	2593	0.989973	1
ASNA1-201	336	A	1820	1	17	0	0	0	.	1838	0.990207	1
ASNA1-201	464	G	19	2266	1	2	0	0	.	2288	0.990385	1
ASNA1-201	100	G	2	937	7	0	0	0	.	946	0.990486	1
ASNA1-201	174	A	1151	0	10	1	0	0	.	1162	0.990534	1
ASNA1-201	322	T	4	11	3	1964	0	0	.	1982	0.990918	1
ASNA1-201	865	A	1228	0	11	0	0	0	.	1239	0.991122	1
ASNA1-201	982	A	900	0	6	1	1	0	.	908	0.991189	1
ASNA1-201	1027	T	0	7	1	954	0	0	.	962	0.991684	1
ASNA1-201	782	T	0	3	19	2630	0	0	.	2652	0.991704	1
ASNA1-201	996	G	5	1076	1	3	0	0	.	1085	0.991705	1
ASNA1-201	330	G	14	1961	1	1	0	0	.	1977	0.991907	1
ASNA1-201	124	T	0	3	9	1476	0	0	.	1488	0.991935	1
ASNA1-201	511	A	2462	1	17	2	0	0	.	2482	0.991942	1
ASNA1-201	352	A	1875	0	14	1	0	0	.	1890	0.992063	1
ASNA1-201	325	A	1881	0	3	8	4	0	.	1896	0.992089	1
ASNA1-201	655	A	1511	1	11	0	0	0	.	1523	0.992121	1
ASNA1-201	643	T	0	7	3	1262	0	0	.	1272	0.992138	1
ASNA1-201	447	G	6	2402	2	11	0	0	.	2421	0.992152	1
ASNA1-201	859	T	0	2	9	1406	0	0	.	1417	0.992237	1
ASNA1-201	256	A	1802	1	13	0	0	0	.	1816	0.992291	1
ASNA1-201	518	A	2324	0	18	0	0	0	.	2342	0.992314	1
ASNA1-201	760	T	0	7	10	2266	0	0	.	2283	0.992554	1
ASNA1-201	629	C	3	8	1889	3	0	0	.	1903	0.992643	1
ASNA1-201	310	A	1499	1	10	0	0	0	.	1510	0.992715	1
ASNA1-201	484	G	18	2531	0	0	0	0	.	2549	0.992938	1
ASNA1-201	774	T	1	8	7	2391	0	1	C	2408	0.99294	1
ASNA1-201	965	G	3	991	0	4	0	0	.	998	0.992986	1
ASNA1-201	705	T	0	11	1	1700	0	0	.	1712	0.992991	1
ASNA1-201	337	G	9	2151	4	2	0	0	.	2166	0.993075	1
ASNA1-201	513	A	2512	0	16	1	0	0	.	2529	0.993278	1
ASNA1-201	522	A	2388	0	16	0	0	0	.	2404	0.993344	1
ASNA1-201	709	T	1	10	1	1804	0	0	.	1816	0.993392	1
ASNA1-201	139	T	3	5	2	1515	0	0	.	1525	0.993443	1
ASNA1-201	224	C	6	2	1372	1	0	0	.	1381	0.993483	1
ASNA1-201	231	A	1373	1	8	0	0	0	.	1382	0.993488	1
ASNA1-201	890	T	0	8	1	1398	0	0	.	1407	0.993603	1
ASNA1-201	921	C	5	0	1412	4	0	0	.	1421	0.993666	1
ASNA1-201	255	G	0	1896	5	7	0	0	.	1908	0.993711	1
ASNA1-201	893	G	6	1584	0	4	0	0	.	1594	0.993726	1
ASNA1-201	180	A	957	1	4	1	0	0	.	963	0.993769	1
ASNA1-201	504	G	8	2730	1	8	0	0	.	2747	0.993811	1
ASNA1-201	1054	C	0	5	804	0	0	0	.	809	0.99382	1
ASNA1-201	889	G	0	1615	1	9	0	0	.	1625	0.993846	1
ASNA1-201	503	G	4	2424	1	10	0	0	.	2439	0.99385	1
ASNA1-201	880	G	9	1616	0	1	0	0	.	1626	0.99385	1
ASNA1-201	679	T	0	9	0	1460	0	0	.	1469	0.993873	1
ASNA1-201	968	G	5	977	0	1	0	0	.	983	0.993896	1
ASNA1-201	920	T	0	8	0	1306	0	0	.	1314	0.993912	1
ASNA1-201	440	C	4	0	2287	10	0	0	.	2301	0.993916	1
ASNA1-201	604	T	0	9	4	2126	0	0	.	2139	0.993922	1
ASNA1-201	911	G	7	1309	0	1	0	0	.	1317	0.993926	1
ASNA1-201	161	C	6	4	1814	1	0	0	.	1825	0.993973	1
ASNA1-201	273	T	0	1	10	1815	0	0	.	1826	0.993976	1
ASNA1-201	691	T	0	8	1	1487	0	0	.	1496	0.993984	1
ASNA1-201	227	C	3	1	1491	5	0	0	.	1500	0.994	1
ASNA1-201	491	C	4	10	2492	1	0	0	.	2507	0.994017	1
ASNA1-201	485	C	6	1	2504	8	0	0	.	2519	0.994045	1
ASNA1-201	324	G	6	1856	0	1	4	0	.	1867	0.994108	1
ASNA1-201	606	A	1867	0	10	1	0	0	.	1878	0.994143	1
ASNA1-201	448	C	4	0	2381	10	0	0	.	2395	0.994154	1
ASNA1-201	308	C	4	5	1707	1	0	0	.	1717	0.994176	1
ASNA1-201	512	C	2	1	2564	12	0	0	.	2579	0.994184	1
ASNA1-201	115	A	1227	0	7	0	0	0	.	1234	0.994327	1
ASNA1-201	418	C	6	1	2108	5	0	0	.	2120	0.99434	1
ASNA1-201	133	T	1	6	2	1591	0	0	.	1600	0.994375	1
ASNA1-201	1043	G	0	884	3	2	0	0	.	889	0.994376	1
ASNA1-201	92	T	1	2	0	533	0	0	.	536	0.994403	1
ASNA1-201	91	C	3	0	537	0	0	0	.	540	0.994444	1
ASNA1-201	756	T	2	11	0	2344	0	0	.	2357	0.994485	1
ASNA1-201	796	T	1	8	2	2000	0	0	.	2011	0.99453	1
ASNA1-201	603	A	2185	1	11	0	0	0	.	2197	0.994538	1
ASNA1-201	962	G	1	922	1	3	0	0	.	927	0.994606	1
ASNA1-201	306	G	6	1850	2	2	0	0	.	1860	0.994624	1
ASNA1-201	598	A	2041	1	9	1	0	0	.	2052	0.994639	1
ASNA1-201	1024	T	0	5	0	929	0	0	.	934	0.994647	1
ASNA1-201	502	T	0	12	0	2235	0	0	.	2247	0.99466	1
ASNA1-201	390	A	1870	1	9	0	0	0	.	1880	0.994681	1
ASNA1-201	721	T	0	11	1	2277	0	0	.	2289	0.994758	1
ASNA1-201	1056	C	0	0	766	4	0	0	.	770	0.994805	1
ASNA1-201	1044	C	2	0	962	0	3	0	.	967	0.994829	1
ASNA1-201	362	C	3	2	1940	5	0	0	.	1950	0.994872	1
ASNA1-201	473	G	10	2529	0	3	0	0	.	2542	0.994886	1
ASNA1-201	742	C	6	3	2340	2	0	1	A	2352	0.994898	1
ASNA1-201	892	A	1565	0	8	0	0	0	.	1573	0.994914	1
ASNA1-201	423	A	1985	1	8	1	0	0	.	1995	0.994987	1
ASNA1-201	112	A	1193	1	5	0	0	0	.	1199	0.994996	1
ASNA1-201	369	T	1	3	5	1818	0	0	.	1827	0.995074	1
ASNA1-201	307	A	1632	0	8	0	0	0	.	1640	0.995122	1
ASNA1-201	980	C	2	0	1020	3	0	0	.	1025	0.995122	1
ASNA1-201	531	A	2248	1	9	1	0	0	.	2259	0.995131	1
ASNA1-201	597	A	2250	0	10	1	0	0	.	2261	0.995135	1
ASNA1-201	515	G	10	2665	1	2	0	0	.	2678	0.995146	1
ASNA1-201	475	T	3	5	3	2257	0	0	.	2268	0.99515	1
ASNA1-201	817	G	1	2261	0	10	0	0	.	2272	0.995158	1
ASNA1-201	459	G	10	2478	0	2	0	0	.	2490	0.995181	1
ASNA1-201	339	C	3	5	2069	2	0	0	.	2079	0.99519	1
ASNA1-201	1033	A	1047	0	5	0	0	0	.	1052	0.995247	1
ASNA1-201	1028	C	0	0	1056	5	0	0	.	1061	0.995287	1
ASNA1-201	456	T	0	6	5	2341	0	0	.	2352	0.995323	1
ASNA1-201	547	A	2134	5	4	1	0	0	.	2144	0.995336	1
ASNA1-201	888	T	1	6	0	1496	0	0	.	1503	0.995343	1
ASNA1-201	470	G	6	2570	4	2	0	0	.	2582	0.995352	1
ASNA1-201	612	T	0	3	6	1928	0	0	.	1937	0.995354	1
ASNA1-201	122	C	2	0	1502	5	0	0	.	1509	0.995361	1
ASNA1-201	246	A	1727	0	7	1	0	0	.	1735	0.995389	1
ASNA1-201	544	T	0	10	0	2160	0	0	.	2170	0.995392	1
ASNA1-201	951	T	1	1	2	864	0	0	.	868	0.995392	1
ASNA1-201	505	T	0	8	4	2611	0	0	.	2623	0.995425	1
ASNA1-201	561	G	2	2621	2	8	0	0	.	2633	0.995442	1
ASNA1-201	477	G	10	2638	0	2	0	0	.	2650	0.995472	1
ASNA1-201	647	G	4	1547	0	3	0	0	.	1554	0.995495	1
ASNA1-201	222	A	1346	0	6	0	0	0	.	1352	0.995562	1
ASNA1-201	333	C	8	0	2030	1	0	0	.	2039	0.995586	1
ASNA1-201	95	A	681	0	3	0	0	0	.	684	0.995614	1
ASNA1-201	562	T	0	9	1	2271	0	0	.	2281	0.995616	1
ASNA1-201	537	A	2514	2	9	0	0	0	.	2525	0.995644	1
ASNA1-201	314	C	5	1	1831	2	0	0	.	1839	0.99565	1
ASNA1-201	192	C	3	1	919	0	0	0	.	923	0.995666	1
ASNA1-201	700	T	2	1	5	1842	0	0	.	1850	0.995676	1
ASNA1-201	985	A	921	1	3	0	0	0	.	925	0.995676	1
ASNA1-201	439	T	0	9	0	2080	0	0	.	2089	0.995692	1
ASNA1-201	713	C	4	0	2316	6	0	0	.	2326	0.995701	1
ASNA1-201	816	T	0	8	1	2089	0	0	.	2098	0.99571	1
ASNA1-201	359	T	2	4	2	1858	0	0	.	1866	0.995713	1
ASNA1-201	529	A	2328	1	9	0	0	0	.	2338	0.995723	1
ASNA1-201	826	A	2103	0	7	2	0	0	.	2112	0.995739	1
ASNA1-201	119	C	1	0	1407	5	0	0	.	1413	0.995754	1
ASNA1-201	449	C	4	1	2360	5	0	0	.	2370	0.995781	1
ASNA1-201	842	T	0	0	7	1662	0	0	.	1669	0.995806	1
ASNA1-201	344	C	5	1	2141	3	0	0	.	2150	0.995814	1
ASNA1-201	583	T	0	8	1	2383	1	0	.	2393	0.995821	1
ASNA1-201	317	T	1	1	6	1909	0	0	.	1917	0.995827	1
ASNA1-201	566	G	4	2626	5	2	0	0	.	2637	0.995829	1
ASNA1-201	870	G	0	1438	0	6	0	0	.	1444	0.995845	1
ASNA1-201	559	T	0	7	3	2411	0	0	.	2421	0.995869	1
ASNA1-201	838	T	0	1	7	1930	0	0	.	1938	0.995872	1
ASNA1-201	163	A	1451	0	6	0	0	0	.	1457	0.995882	1
ASNA1-201	884	G	3	1695	2	2	0	0	.	1702	0.995887	1
ASNA1-201	258	G	7	1947	1	0	0	0	.	1955	0.995908	1
ASNA1-201	1004	G	0	976	0	4	0	0	.	980	0.995918	1
ASNA1-201	548	C	3	5	2448	2	0	0	.	2458	0.995932	1
ASNA1-201	363	G	5	1962	1	2	0	0	.	1970	0.995939	1
ASNA1-201	743	T	0	0	9	2221	0	0	.	2230	0.995964	1
ASNA1-201	132	A	1497	1	5	0	0	0	.	1503	0.996008	1
ASNA1-201	1020	G	1	998	1	2	0	0	.	1002	0.996008	1
ASNA1-201	940	T	1	2	2	1250	0	0	.	1255	0.996016	1
ASNA1-201	1030	T	0	3	1	1004	0	0	.	1008	0.996032	1
ASNA1-201	639	G	3	1507	0	3	0	0	.	1513	0.996034	1
ASNA1-201	489	A	2520	0	9	1	0	0	.	2530	0.996047	1
ASNA1-201	499	T	1	7	1	2272	0	0	.	2281	0.996054	1
ASNA1-201	361	A	1775	1	6	0	0	0	.	1782	0.996072	1
ASNA1-201	176	C	4	0	1269	1	0	0	.	1274	0.996075	1
ASNA1-201	493	T	1	5	4	2545	0	0	.	2555	0.996086	1
ASNA1-201	751	G	6	2291	0	3	0	0	.	2300	0.996087	1
ASNA1-201	295	T	1	4	2	1785	0	0	.	1792	0.996094	1
ASNA1-201	836	T	0	0	8	2041	0	0	.	2049	0.996096	1
ASNA1-201	346	T	0	4	4	2051	0	0	.	2059	0.996115	1
ASNA1-201	379	A	1801	0	7	0	0	0	.	1808	0.996128	1
ASNA1-201	351	G	4	2059	0	4	0	0	.	2067	0.99613	1
ASNA1-201	856	T	0	5	0	1287	0	0	.	1292	0.99613	1
ASNA1-201	173	C	3	0	1290	2	0	0	.	1295	0.996139	1
ASNA1-201	134	C	2	0	1553	4	0	0	.	1559	0.996151	1
ASNA1-201	332	C	1	2	2072	5	0	0	.	2080	0.996154	1
ASNA1-201	1031	G	0	1047	0	4	0	0	.	1051	0.996194	1
ASNA1-201	828	A	2113	0	8	0	0	0	.	2121	0.996228	1
ASNA1-201	487	T	0	5	4	2381	0	0	.	2390	0.996234	1
ASNA1-201	590	G	6	2385	0	3	0	0	.	2394	0.996241	1
ASNA1-201	137	C	4	1	1592	1	0	0	.	1598	0.996245	1
ASNA1-201	1064	C	2	0	532	0	0	0	.	534	0.996255	1
ASNA1-201	244	A	1605	0	5	1	0	0	.	1611	0.996276	1
ASNA1-201	994	G	0	1079	1	3	0	0	.	1083	0.996307	1
ASNA1-201	703	G	4	1892	0	3	0	0	.	1899	0.996314	1
ASNA1-201	681	G	0	1633	1	5	0	0	.	1639	0.996339	1
ASNA1-201	637	T	1	3	1	1362	0	0	.	1367	0.996342	1
ASNA1-201	926	C	1	1	1363	3	0	0	.	1368	0.996345	1
ASNA1-201	187	C	2	0	1091	2	0	0	.	1095	0.996347	1
ASNA1-201	553	C	6	3	2460	0	0	0	.	2469	0.996355	1
ASNA1-201	1011	A	1101	0	3	1	0	0	.	1105	0.99638	1
ASNA1-201	967	T	0	2	1	827	0	0	.	830	0.996386	1
ASNA1-201	392	C	2	0	1930	5	0	0	.	1937	0.996386	1
ASNA1-201	329	T	2	1	4	1936	0	0	.	1943	0.996397	1
ASNA1-201	397	G	5	1946	0	2	0	0	.	1953	0.996416	1
ASNA1-201	728	C	1	0	2229	7	0	0	.	2237	0.996424	1
ASNA1-201	581	G	3	2511	3	3	0	0	.	2520	0.996429	1
ASNA1-201	853	T	0	5	0	1396	0	0	.	1401	0.996431	1
ASNA1-201	997	C	2	0	1118	1	1	0	.	1122	0.996435	1
ASNA1-201	1007	C	1	2	1119	1	0	0	.	1123	0.996438	1
ASNA1-201	907	T	0	4	1	1400	0	0	.	1405	0.996441	1
ASNA1-201	873	A	1406	1	4	0	0	0	.	1411	0.996456	1
ASNA1-201	918	T	0	0	5	1407	0	0	.	1412	0.996459	1
ASNA1-201	632	C	6	0	1690	0	0	0	.	1696	0.996462	1
ASNA1-201	738	A	2260	1	7	0	0	0	.	2268	0.996473	1
ASNA1-201	800	C	0	0	2270	8	0	0	.	2278	0.996488	1
ASNA1-201	340	T	0	2	3	1987	2	0	.	1994	0.996489	1
ASNA1-201	808	T	1	3	3	1987	0	0	.	1994	0.996489	1
ASNA1-201	924	G	1	1420	0	4	0	0	.	1425	0.996491	1
ASNA1-201	357	C	2	1	1993	4	0	0	.	2000	0.9965	1
ASNA1-201	733	A	2278	1	6	1	0	0	.	2286	0.9965	1
ASNA1-201	478	T	1	6	1	2295	0	0	.	2303	0.996526	1
ASNA1-201	410	G	4	2013	0	3	0	0	.	2020	0.996535	1
ASNA1-201	592	T	0	7	1	2301	0	0	.	2309	0.996535	1
ASNA1-201	689	G	0	1731	1	5	0	0	.	1737	0.996546	1
ASNA1-201	560	C	3	3	2599	3	0	0	.	2608	0.996549	1
ASNA1-201	596	G	2	2321	0	6	0	0	.	2329	0.996565	1
ASNA1-201	166	C	1	1	1451	3	0	0	.	1456	0.996566	1
ASNA1-201	451	T	0	2	6	2323	0	0	.	2331	0.996568	1
ASNA1-201	382	A	2039	0	6	1	0	0	.	2046	0.996579	1
ASNA1-201	242	A	1457	0	4	1	0	0	.	1462	0.99658	1
ASNA1-201	765	G	4	2340	0	4	0	0	.	2348	0.996593	1
ASNA1-201	869	C	4	1	1466	0	0	0	.	1471	0.996601	1
ASNA1-201	574	T	1	7	0	2349	0	0	.	2357	0.996606	1
ASNA1-201	239	A	1470	0	5	0	0	0	.	1475	0.99661	1
ASNA1-201	576	G	3	2664	1	5	0	0	.	2673	0.996633	1
ASNA1-201	769	T	1	4	4	2676	0	0	.	2685	0.996648	1
ASNA1-201	649	A	1491	1	4	0	0	0	.	1496	0.996658	1
ASNA1-201	453	A	2395	0	7	1	0	0	.	2403	0.996671	1
ASNA1-201	445	A	2100	1	6	0	0	0	.	2107	0.996678	1
ASNA1-201	905	G	0	1502	2	3	0	0	.	1507	0.996682	1
ASNA1-201	436	G	7	2107	0	0	0	0	.	2114	0.996689	1
ASNA1-201	288	A	1812	0	6	0	0	0	.	1818	0.9967	1
ASNA1-201	667	T	0	3	2	1513	0	0	.	1518	0.996706	1
ASNA1-201	366	T	0	6	0	1818	0	0	.	1824	0.996711	1
ASNA1-201	964	A	909	1	2	0	0	0	.	912	0.996711	1
ASNA1-201	296	C	5	1	1822	0	0	0	.	1828	0.996718	1
ASNA1-201	193	A	912	0	3	0	0	0	.	915	0.996721	1
ASNA1-201	720	T	0	5	2	2144	0	0	.	2151	0.996746	1
ASNA1-201	327	A	1845	0	6	0	0	0	.	1851	0.996759	1
ASNA1-201	541	T	0	6	1	2154	0	0	.	2161	0.996761	1
ASNA1-201	898	G	2	1543	0	3	0	0	.	1548	0.99677	1
ASNA1-201	216	G	4	1545	0	1	0	0	.	1550	0.996774	1
ASNA1-201	311	C	3	0	1858	3	0	0	.	1864	0.996781	1
ASNA1-201	983	T	0	3	0	930	0	0	.	933	0.996785	1
ASNA1-201	93	A	621	1	1	0	0	0	.	623	0.99679	1
ASNA1-201	810	G	3	2180	1	3	0	0	.	2187	0.996799	1
ASNA1-201	266	C	4	1	1869	1	0	0	.	1875	0.9968	1
ASNA1-201	973	T	0	3	0	936	0	0	.	939	0.996805	1
ASNA1-201	607	G	0	1881	5	1	0	0	.	1887	0.99682	1
ASNA1-201	319	C	3	0	1894	3	0	0	.	1900	0.996842	1
ASNA1-201	900	C	4	1	1587	0	0	0	.	1592	0.996859	1
ASNA1-201	500	G	0	2540	0	8	0	0	.	2548	0.99686	1
ASNA1-201	207	C	1	1	1277	2	0	0	.	1281	0.996877	1
ASNA1-201	252	T	0	3	3	1918	0	0	.	1924	0.996881	1
ASNA1-201	328	T	0	3	3	1918	0	0	.	1924	0.996881	1
ASNA1-201	879	T	0	3	1	1599	1	0	.	1604	0.996883	1
ASNA1-201	476	G	5	2560	1	2	0	0	.	2568	0.996885	1
ASNA1-201	275	C	6	0	1921	0	0	0	.	1927	0.996886	1
ASNA1-201	120	A	1282	0	4	0	0	0	.	1286	0.99689	1
ASNA1-201	764	T	0	6	1	2246	0	0	.	2253	0.996893	1
ASNA1-201	567	C	1	0	2573	7	0	0	.	2581	0.9969	1
ASNA1-201	569	G	3	2574	0	5	0	0	.	2582	0.996902	1
ASNA1-201	323	G	0	1931	0	2	4	0	.	1937	0.996902	1
ASNA1-201	558	A	2259	0	7	0	0	0	.	2266	0.996911	1
ASNA1-201	401	G	2	1941	1	3	0	0	.	1947	0.996918	1
ASNA1-201	725	G	2	2270	0	5	0	0	.	2277	0.996926	1
ASNA1-201	957	A	975	1	1	1	0	0	.	978	0.996933	1
ASNA1-201	737	G	1	2277	0	6	0	0	.	2284	0.996935	1
ASNA1-201	113	G	0	1305	4	0	0	0	.	1309	0.996944	1
ASNA1-201	462	G	1	2289	1	5	0	0	.	2296	0.996951	1
ASNA1-201	409	T	0	1	5	1963	0	0	.	1969	0.996953	1
ASNA1-201	935	G	0	1313	1	3	0	0	.	1317	0.996963	1
ASNA1-201	575	G	2	2627	0	6	0	0	.	2635	0.996964	1
ASNA1-201	644	G	0	1647	0	4	1	0	.	1652	0.996973	1
ASNA1-201	734	G	0	2310	0	7	0	0	.	2317	0.996979	1
ASNA1-201	591	A	2314	1	6	0	0	0	.	2321	0.996984	1
ASNA1-201	631	A	1660	0	5	0	0	0	.	1665	0.996997	1
ASNA1-201	599	C	5	1	2325	1	0	0	.	2332	0.996998	1
ASNA1-201	677	G	4	1663	0	1	0	0	.	1668	0.997002	1
ASNA1-201	1015	T	1	2	0	998	0	0	.	1001	0.997003	1
ASNA1-201	520	C	3	1	2667	4	0	0	.	2675	0.997009	1
ASNA1-201	858	T	1	0	3	1336	0	0	.	1340	0.997015	1
ASNA1-201	887	G	1	1670	0	4	0	0	.	1675	0.997015	1
ASNA1-201	171	T	0	2	2	1341	0	0	.	1345	0.997026	1
ASNA1-201	881	C	1	0	1683	4	0	0	.	1688	0.997038	1
ASNA1-201	565	A	2364	0	7	0	0	0	.	2371	0.997048	1
ASNA1-201	545	C	5	1	2369	1	0	0	.	2376	0.997054	1
ASNA1-201	492	T	0	1	6	2384	0	0	.	2391	0.997072	1
ASNA1-201	146	C	1	1	1703	3	0	0	.	1708	0.997073	1
ASNA1-201	923	G	0	1371	0	4	0	0	.	1375	0.997091	1
ASNA1-201	116	G	0	1376	4	0	0	0	.	1380	0.997101	1
ASNA1-201	353	G	4	2071	1	1	0	0	.	2077	0.997111	1
ASNA1-201	971	G	1	1036	1	1	0	0	.	1039	0.997113	1
ASNA1-201	687	A	1729	0	4	1	0	0	.	1734	0.997116	1
ASNA1-201	419	C	0	2	2091	4	0	0	.	2097	0.997139	1
ASNA1-201	425	C	4	0	2095	2	0	0	.	2101	0.997144	1
ASNA1-201	844	T	0	4	0	1397	0	0	.	1401	0.997145	1
ASNA1-201	974	G	0	1050	0	3	0	0	.	1053	0.997151	1
ASNA1-201	427	C	1	0	2107	5	0	0	.	2113	0.99716	1
ASNA1-201	1060	A	703	0	1	1	0	0	.	705	0.997163	1
ASNA1-201	426	G	3	2113	2	1	0	0	.	2119	0.997168	1
ASNA1-201	94	C	2	0	712	0	0	0	.	714	0.997199	1
ASNA1-201	972	C	1	0	1074	2	0	0	.	1077	0.997214	1
ASNA1-201	488	G	5	2513	0	2	0	0	.	2520	0.997222	1
ASNA1-201	786	A	2521	0	6	1	0	0	.	2528	0.997231	1
ASNA1-201	514	C	0	0	2525	2	5	0	.	2532	0.997235	1
ASNA1-201	874	A	1463	0	4	0	0	0	.	1467	0.997273	1
ASNA1-201	602	G	0	2195	1	5	0	0	.	2201	0.997274	1
ASNA1-201	1052	T	0	1	0	734	1	0	.	736	0.997283	1
ASNA1-201	995	G	0	1102	0	3	0	0	.	1105	0.997285	1
ASNA1-201	190	T	0	2	1	1103	0	0	.	1106	0.997288	1
ASNA1-201	794	G	3	2208	1	2	0	0	.	2214	0.99729	1
ASNA1-201	521	C	4	0	2580	3	0	0	.	2587	0.997294	1
ASNA1-201	798	A	2213	1	5	0	0	0	.	2219	0.997296	1
ASNA1-201	186	G	2	1111	1	0	0	0	.	1114	0.997307	1
ASNA1-201	316	T	0	2	3	1853	0	0	.	1858	0.997309	1
ASNA1-201	908	C	4	0	1485	0	0	0	.	1489	0.997314	1
ASNA1-201	368	C	4	1	1858	0	0	0	.	1863	0.997316	1
ASNA1-201	672	T	0	4	0	1489	0	0	.	1493	0.997321	1
ASNA1-201	285	C	3	1	1862	1	0	0	.	1867	0.997322	1
ASNA1-201	233	A	1490	0	4	0	0	0	.	1494	0.997323	1
ASNA1-201	546	A	2239	0	5	1	0	0	.	2245	0.997327	1
ASNA1-201	872	G	0	1493	0	4	0	0	.	1497	0.997328	1
ASNA1-201	1002	A	1120	0	3	0	0	0	.	1123	0.997329	1
ASNA1-201	287	T	0	1	4	1872	0	0	.	1877	0.997336	1
ASNA1-201	664	A	1506	0	4	0	0	0	.	1510	0.997351	1
ASNA1-201	763	C	1	3	2259	2	0	0	.	2265	0.997351	1
ASNA1-201	415	A	1894	0	5	0	0	0	.	1899	0.997367	1
ASNA1-201	778	T	0	2	5	2652	0	0	.	2659	0.997367	1
ASNA1-201	652	T	1	2	1	1516	0	0	.	1520	0.997368	1
ASNA1-201	237	C	4	0	1518	0	0	0	.	1522	0.997372	1
ASNA1-201	444	G	5	2285	0	1	0	0	.	2291	0.997381	1
ASNA1-201	446	G	4	2295	0	1	1	0	.	2301	0.997392	1
ASNA1-201	370	T	1	3	1	1922	0	0	.	1927	0.997405	1
ASNA1-201	358	C	3	2	1927	0	0	0	.	1932	0.997412	1
ASNA1-201	726	G	1	2314	1	4	0	0	.	2320	0.997414	1
ASNA1-201	508	T	1	0	6	2705	0	0	.	2712	0.997419	1
ASNA1-201	577	G	3	2706	0	4	0	0	.	2713	0.99742	1
ASNA1-201	260	T	0	2	2	1942	1	0	.	1947	0.997432	1
ASNA1-201	395	G	0	1943	0	5	0	0	.	1948	0.997433	1
ASNA1-201	634	T	0	4	0	1555	0	0	.	1559	0.997434	1
ASNA1-201	301	G	1	1945	1	3	0	0	.	1950	0.997436	1
ASNA1-201	408	A	1949	0	4	1	0	0	.	1954	0.997441	1
ASNA1-201	762	G	1	2348	2	3	0	0	.	2354	0.997451	1
ASNA1-201	1001	C	0	3	1177	0	0	0	.	1180	0.997458	1
ASNA1-201	396	G	0	1968	0	5	0	0	.	1973	0.997466	1
ASNA1-201	138	G	3	1588	0	1	0	0	.	1592	0.997487	1
ASNA1-201	618	T	0	3	2	1987	0	0	.	1992	0.99749	1
ASNA1-201	646	G	0	1590	1	3	0	0	.	1594	0.997491	1
ASNA1-201	374	G	3	1991	0	2	0	0	.	1996	0.997495	1
ASNA1-201	669	G	0	1595	1	3	0	0	.	1599	0.997498	1
ASNA1-201	386	G	3	1995	1	1	0	0	.	2000	0.9975	1
ASNA1-201	660	G	1	1596	0	3	0	0	.	1600	0.9975	1
ASNA1-201	770	C	3	0	2804	4	0	0	.	2811	0.99751	1
ASNA1-201	421	T	0	5	0	2013	0	0	.	2018	0.997522	1
ASNA1-201	360	G	4	2014	0	1	0	0	.	2019	0.997524	1
ASNA1-201	354	C	5	0	2017	0	0	0	.	2022	0.997527	1
ASNA1-201	657	G	1	1625	1	2	0	0	.	1629	0.997545	1
ASNA1-201	381	A	2033	0	5	0	0	0	.	2038	0.997547	1
ASNA1-201	958	T	0	2	0	815	0	0	.	817	0.997552	1
ASNA1-201	613	T	1	3	1	2039	0	0	.	2044	0.997554	1
ASNA1-201	474	C	1	3	2453	2	0	0	.	2459	0.99756	1
ASNA1-201	961	T	0	2	0	822	0	0	.	824	0.997573	1
ASNA1-201	435	G	2	2072	0	3	0	0	.	2077	0.997593	1
ASNA1-201	614	C	3	1	2073	1	0	0	.	2078	0.997594	1
ASNA1-201	422	G	1	2091	1	3	0	0	.	2096	0.997615	1
ASNA1-201	885	A	1683	0	4	0	0	0	.	1687	0.997629	1
ASNA1-201	675	A	1690	0	3	1	0	0	.	1694	0.997639	1
ASNA1-201	942	T	0	0	3	1270	0	0	.	1273	0.997643	1
ASNA1-201	528	C	6	0	2544	0	0	0	.	2550	0.997647	1
ASNA1-201	830	A	2121	0	4	1	0	0	.	2126	0.997648	1
ASNA1-201	809	G	4	2123	0	1	0	0	.	2128	0.99765	1
ASNA1-201	243	C	1	0	1708	3	0	0	.	1712	0.997664	1
ASNA1-201	315	T	0	0	4	1712	0	0	.	1716	0.997669	1
ASNA1-201	348	G	1	2142	0	4	0	0	.	2147	0.997671	1
ASNA1-201	110	C	3	0	1286	0	0	0	.	1289	0.997673	1
ASNA1-201	682	A	1715	1	2	0	1	0	.	1719	0.997673	1
ASNA1-201	584	T	0	1	5	2577	0	0	.	2583	0.997677	1
ASNA1-201	1051	G	1	861	0	1	0	0	.	863	0.997683	1
ASNA1-201	936	G	0	1294	0	3	0	0	.	1297	0.997687	1
ASNA1-201	627	T	0	3	1	1727	0	0	.	1731	0.997689	1
ASNA1-201	688	C	3	0	1736	1	0	0	.	1740	0.997701	1
ASNA1-201	494	C	3	0	2610	3	0	0	.	2616	0.997706	1
ASNA1-201	729	C	1	0	2186	4	0	0	.	2191	0.997718	1
ASNA1-201	213	A	1312	2	0	1	0	0	.	1315	0.997719	1
ASNA1-201	833	C	3	0	2196	2	0	0	.	2201	0.997728	1
ASNA1-201	727	A	2202	0	4	1	0	0	.	2207	0.997734	1
ASNA1-201	1049	C	1	1	882	0	0	0	.	884	0.997738	1
ASNA1-201	941	G	0	1324	0	3	0	0	.	1327	0.997739	1
ASNA1-201	507	T	0	5	1	2650	0	0	.	2656	0.997741	1
ASNA1-201	624	A	1770	1	3	0	0	0	.	1774	0.997745	1
ASNA1-201	766	A	2662	2	4	0	0	0	.	2668	0.997751	1
ASNA1-201	516	G	3	2667	0	3	0	0	.	2673	0.997755	1
ASNA1-201	929	G	0	1334	1	2	0	0	.	1337	0.997756	1
ASNA1-201	517	C	5	0	2671	1	0	0	.	2677	0.997759	1
ASNA1-201	376	A	1781	1	3	0	0	0	.	1785	0.997759	1
ASNA1-201	1050	A	891	2	0	0	0	0	.	893	0.99776	1
ASNA1-201	933	G	0	1337	0	3	0	0	.	1340	0.997761	1
ASNA1-201	934	A	1337	1	2	0	0	0	.	1340	0.997761	1
ASNA1-201	910	A	1338	0	3	0	0	0	.	1341	0.997763	1
ASNA1-201	781	A	2684	1	4	1	0	0	.	2690	0.99777	1
ASNA1-201	394	T	1	3	0	1817	0	0	.	1821	0.997803	1
ASNA1-201	461	C	2	0	2276	3	0	0	.	2281	0.997808	1
ASNA1-201	588	C	2	0	2293	3	0	0	.	2298	0.997824	1
ASNA1-201	754	T	0	4	1	2294	0	0	.	2299	0.997825	1
ASNA1-201	819	A	2299	4	1	0	0	0	.	2304	0.99783	1
ASNA1-201	793	G	1	2309	0	4	0	0	.	2314	0.997839	1
ASNA1-201	850	A	1387	0	3	0	0	0	.	1390	0.997842	1
ASNA1-201	267	C	4	0	1850	0	0	0	.	1854	0.997843	1
ASNA1-201	847	A	1390	0	3	0	0	0	.	1393	0.997846	1
ASNA1-201	620	A	1864	0	4	0	0	0	.	1868	0.997859	1
ASNA1-201	294	G	3	1867	0	1	0	0	.	1871	0.997862	1
ASNA1-201	855	G	0	1402	0	3	0	0	.	1405	0.997865	1
ASNA1-201	975	T	0	2	0	935	0	0	.	937	0.997866	1
ASNA1-201	155	T	0	3	1	1871	0	0	.	1875	0.997867	1
ASNA1-201	914	C	1	0	1405	2	0	0	.	1408	0.997869	1
ASNA1-201	169	C	3	0	1411	0	0	0	.	1414	0.997878	1
ASNA1-201	912	G	1	1412	0	2	0	0	.	1415	0.99788	1
ASNA1-201	320	T	0	4	0	1883	0	0	.	1887	0.99788	1
ASNA1-201	706	C	3	0	1884	1	0	0	.	1888	0.997881	1
ASNA1-201	959	C	2	0	942	0	0	0	.	944	0.997881	1
ASNA1-201	312	C	3	0	1885	1	0	0	.	1889	0.997882	1
ASNA1-201	280	A	1887	1	3	0	0	0	.	1891	0.997885	1
ASNA1-201	789	G	0	2360	0	5	0	0	.	2365	0.997886	1
ASNA1-201	987	G	1	945	1	0	0	0	.	947	0.997888	1
ASNA1-201	849	C	3	0	1418	0	0	0	.	1421	0.997889	1
ASNA1-201	861	C	3	0	1434	0	0	0	.	1437	0.997912	1
ASNA1-201	217	T	0	3	0	1435	0	0	.	1438	0.997914	1
ASNA1-201	259	C	1	0	1918	3	0	0	.	1922	0.997919	1
ASNA1-201	407	G	1	1926	0	3	0	0	.	1930	0.997927	1
ASNA1-201	917	G	1	1447	0	2	0	0	.	1450	0.997931	1
ASNA1-201	843	G	0	1448	1	2	0	0	.	1451	0.997932	1
ASNA1-201	851	G	1	1453	1	1	0	0	.	1456	0.99794	1
ASNA1-201	371	C	3	1	1938	0	0	0	.	1942	0.99794	1
ASNA1-201	490	A	2429	1	4	0	0	0	.	2434	0.997946	1
ASNA1-201	984	G	0	977	0	2	0	0	.	979	0.997957	1
ASNA1-201	261	T	0	2	2	1955	0	0	.	1959	0.997958	1
ASNA1-201	554	C	4	0	2444	1	0	0	.	2449	0.997958	1
ASNA1-201	364	A	1957	1	3	0	0	0	.	1961	0.99796	1
ASNA1-201	159	G	1	1959	1	2	0	0	.	1963	0.997962	1
ASNA1-201	615	A	1962	1	2	1	0	0	.	1966	0.997965	1
ASNA1-201	1036	C	1	1	986	0	0	0	.	988	0.997976	1
ASNA1-201	605	C	2	2	1979	0	0	0	.	1983	0.997983	1
ASNA1-201	411	C	2	0	1989	2	0	0	.	1993	0.997993	1
ASNA1-201	274	T	0	3	1	2000	0	0	.	2004	0.998004	1
ASNA1-201	380	C	4	0	2010	0	0	0	.	2014	0.998014	1
ASNA1-201	121	G	3	1511	0	0	0	0	.	1514	0.998018	1
ASNA1-201	391	G	0	2016	2	2	0	0	.	2020	0.99802	1
ASNA1-201	608	C	3	0	2018	0	1	0	.	2022	0.998022	1
ASNA1-201	105	A	1011	0	1	1	0	0	.	1013	0.998026	1
ASNA1-201	1013	C	2	0	1011	0	0	0	.	1013	0.998026	1
ASNA1-201	232	C	3	0	1520	0	0	0	.	1523	0.99803	1
ASNA1-201	906	A	1520	0	3	0	0	0	.	1523	0.99803	1
ASNA1-201	335	C	4	0	2038	0	0	0	.	2042	0.998041	1
ASNA1-201	129	T	0	0	3	1529	0	0	.	1532	0.998042	1
ASNA1-201	556	C	4	0	2558	1	0	0	.	2563	0.998049	1
ASNA1-201	196	T	0	1	1	1025	0	0	.	1027	0.998053	1
ASNA1-201	977	A	1028	0	2	0	0	0	.	1030	0.998058	1
ASNA1-201	661	A	1544	0	2	1	0	0	.	1547	0.998061	1
ASNA1-201	417	G	2	2061	0	2	0	0	.	2065	0.998063	1
ASNA1-201	195	C	2	0	1033	0	0	0	.	1035	0.998068	1
ASNA1-201	1032	G	0	1034	0	2	0	0	.	1036	0.998069	1
ASNA1-201	648	G	0	1555	0	3	0	0	.	1558	0.998074	1
ASNA1-201	130	G	0	1556	0	3	0	0	.	1559	0.998076	1
ASNA1-201	563	G	1	2600	0	4	0	0	.	2605	0.998081	1
ASNA1-201	638	G	1	1562	0	2	0	0	.	1565	0.998083	1
ASNA1-201	645	G	0	1567	1	2	0	0	.	1570	0.998089	1
ASNA1-201	383	C	3	1	2094	0	0	0	.	2098	0.998093	1
ASNA1-201	498	G	1	2621	1	3	0	0	.	2626	0.998096	1
ASNA1-201	90	C	0	0	526	0	1	0	.	527	0.998102	1
ASNA1-201	894	G	0	1578	0	3	0	0	.	1581	0.998102	1
ASNA1-201	230	C	3	0	1580	0	0	0	.	1583	0.998105	1
ASNA1-201	776	C	1	1	2659	3	0	0	.	2664	0.998123	1
ASNA1-201	886	T	1	2	0	1596	0	0	.	1599	0.998124	1
ASNA1-201	832	A	2130	3	1	0	0	0	.	2134	0.998126	1
ASNA1-201	443	T	0	3	1	2133	0	0	.	2137	0.998128	1
ASNA1-201	750	T	1	1	2	2136	0	0	.	2140	0.998131	1
ASNA1-201	571	G	0	2677	1	4	0	0	.	2682	0.998136	1
ASNA1-201	773	G	0	2685	1	4	0	0	.	2690	0.998141	1
ASNA1-201	823	T	0	0	4	2148	0	0	.	2152	0.998141	1
ASNA1-201	431	T	0	1	3	2150	0	0	.	2154	0.998143	1
ASNA1-201	804	G	0	2150	0	4	0	0	.	2154	0.998143	1
ASNA1-201	1022	C	1	1	1078	0	0	0	.	1080	0.998148	1
ASNA1-201	238	C	3	0	1629	0	0	0	.	1632	0.998162	1
ASNA1-201	825	G	0	2175	2	2	0	0	.	2179	0.998164	1
ASNA1-201	1065	A	545	1	0	0	0	0	.	546	0.998168	1
ASNA1-201	191	C	1	1	1092	0	0	0	.	1094	0.998172	1
ASNA1-201	673	C	1	2	1640	0	0	0	.	1643	0.998174	1
ASNA1-201	824	T	0	0	4	2196	0	0	.	2200	0.998182	1
ASNA1-201	992	G	0	1100	0	2	0	0	.	1102	0.998185	1
ASNA1-201	749	C	4	0	2204	0	0	0	.	2208	0.998188	1
ASNA1-201	670	C	1	1	1662	1	0	0	.	1665	0.998198	1
ASNA1-201	993	G	0	1110	0	2	0	0	.	1112	0.998201	1
ASNA1-201	1003	A	1112	0	2	0	0	0	.	1114	0.998205	1
ASNA1-201	194	G	0	1115	1	1	0	0	.	1117	0.998209	1
ASNA1-201	878	C	2	0	1678	1	0	0	.	1681	0.998215	1
ASNA1-201	519	C	3	1	2808	1	0	0	.	2813	0.998223	1
ASNA1-201	653	G	0	1685	1	2	0	0	.	1688	0.998223	1
ASNA1-201	463	A	2253	0	4	0	0	0	.	2257	0.998228	1
ASNA1-201	979	C	2	0	1131	0	0	0	.	1133	0.998235	1
ASNA1-201	882	A	1698	2	1	0	0	0	.	1701	0.998236	1
ASNA1-201	290	C	3	0	1703	0	0	0	.	1706	0.998242	1
ASNA1-201	739	C	3	0	2285	1	0	0	.	2289	0.998253	1
ASNA1-201	683	G	0	1714	0	3	0	0	.	1717	0.998253	1
ASNA1-201	241	C	3	0	1732	0	0	0	.	1735	0.998271	1
ASNA1-201	1008	A	1157	1	0	1	0	0	.	1159	0.998274	1
ASNA1-201	247	A	1739	0	3	0	0	0	.	1742	0.998278	1
ASNA1-201	291	A	1741	0	3	0	0	0	.	1744	0.99828	1
ASNA1-201	999	G	2	1163	0	0	0	0	.	1165	0.998283	1
ASNA1-201	747	A	2329	0	4	0	0	0	.	2333	0.998285	1
ASNA1-201	716	A	2335	1	2	1	0	0	.	2339	0.99829	1
ASNA1-201	150	G	1	1760	0	2	0	0	.	1763	0.998298	1
ASNA1-201	593	C	3	1	2358	0	0	0	.	2362	0.998307	1
ASNA1-201	1000	A	1179	0	2	0	0	0	.	1181	0.998307	1
ASNA1-201	152	T	0	3	0	1769	0	0	.	1772	0.998307	1
ASNA1-201	723	A	2365	0	3	1	0	0	.	2369	0.998312	1
ASNA1-201	948	G	0	1187	0	2	0	0	.	1189	0.998318	1
ASNA1-201	450	A	2386	0	4	0	0	0	.	2390	0.998326	1
ASNA1-201	625	T	1	1	1	1803	0	0	.	1806	0.998339	1
ASNA1-201	755	A	2406	1	3	0	0	0	.	2410	0.99834	1
ASNA1-201	791	G	0	2415	1	3	0	0	.	2419	0.998346	1
ASNA1-201	946	A	1210	0	2	0	0	0	.	1212	0.99835	1
ASNA1-201	469	T	0	3	1	2429	0	0	.	2433	0.998356	1
ASNA1-201	480	A	2432	0	4	0	0	0	.	2436	0.998358	1
ASNA1-201	106	T	0	1	1	1218	0	0	.	1220	0.998361	1
ASNA1-201	304	A	1827	2	0	1	0	0	.	1830	0.998361	1
ASNA1-201	313	T	0	2	1	1830	0	0	.	1833	0.998363	1
ASNA1-201	377	G	0	1832	0	2	1	0	.	1835	0.998365	1
ASNA1-201	108	A	1227	0	2	0	0	0	.	1229	0.998373	1
ASNA1-201	471	A	2460	0	4	0	0	0	.	2464	0.998377	1
ASNA1-201	388	T	0	2	1	1846	0	0	.	1849	0.998378	1
ASNA1-201	157	T	0	2	1	1855	0	0	.	1858	0.998385	1
ASNA1-201	177	T	0	0	2	1238	0	0	.	1240	0.998387	1
ASNA1-201	107	C	1	0	1239	1	0	0	.	1241	0.998388	1
ASNA1-201	626	G	0	1862	0	3	0	0	.	1865	0.998391	1
ASNA1-201	611	T	0	0	2	1875	1	0	.	1878	0.998403	1
ASNA1-201	405	A	1890	0	3	0	0	0	.	1893	0.998415	1
ASNA1-201	1063	A	630	0	1	0	0	0	.	631	0.998415	1
ASNA1-201	696	G	0	1914	0	3	0	0	.	1917	0.998435	1
ASNA1-201	622	A	1916	1	2	0	0	0	.	1919	0.998437	1
ASNA1-201	931	T	0	1	1	1278	0	0	.	1280	0.998437	1
ASNA1-201	251	C	2	1	1920	0	0	0	.	1923	0.99844	1
ASNA1-201	945	G	0	1280	0	2	0	0	.	1282	0.99844	1
ASNA1-201	412	A	1922	0	2	1	0	0	.	1925	0.998442	1
ASNA1-201	367	T	0	3	0	1926	0	0	.	1929	0.998445	1
ASNA1-201	160	G	2	1930	1	0	0	0	.	1933	0.998448	1
ASNA1-201	355	T	0	3	0	1932	0	0	.	1935	0.99845	1
ASNA1-201	586	T	0	1	3	2578	0	0	.	2582	0.998451	1
ASNA1-201	257	T	0	1	2	1940	0	0	.	1943	0.998456	1
ASNA1-201	175	G	0	1294	2	0	0	0	.	1296	0.998457	1
ASNA1-201	610	C	2	0	1951	1	0	0	.	1954	0.998465	1
ASNA1-201	623	G	0	1960	0	3	0	0	.	1963	0.998472	1
ASNA1-201	211	A	1308	0	2	0	0	0	.	1310	0.998473	1
ASNA1-201	564	G	0	2620	1	3	0	0	.	2624	0.998476	1
ASNA1-201	621	C	3	0	1965	0	0	0	.	1968	0.998476	1
ASNA1-201	208	G	2	1312	0	0	0	0	.	1314	0.998478	1
ASNA1-201	524	G	1	2624	0	3	0	0	.	2628	0.998478	1
ASNA1-201	277	C	3	0	1972	0	0	0	.	1975	0.998481	1
ASNA1-201	587	G	1	2647	1	2	0	0	.	2651	0.998491	1
ASNA1-201	215	T	0	2	0	1334	0	0	.	1336	0.998503	1
ASNA1-201	398	C	1	0	2001	2	0	0	.	2004	0.998503	1
ASNA1-201	539	G	3	2668	0	1	0	0	.	2672	0.998503	1
ASNA1-201	114	C	2	0	1336	0	0	0	.	1338	0.998505	1
ASNA1-201	167	C	2	0	1338	0	0	0	.	1340	0.998507	1
ASNA1-201	365	G	1	2012	0	2	0	0	.	2015	0.998511	1
ASNA1-201	783	G	0	2688	0	4	0	0	.	2692	0.998514	1
ASNA1-201	932	G	0	1348	0	2	0	0	.	1350	0.998519	1
ASNA1-201	389	G	1	2027	1	1	0	0	.	2030	0.998522	1
ASNA1-201	938	C	2	0	1355	0	0	0	.	1357	0.998526	1
ASNA1-201	349	C	2	1	2045	0	0	0	.	2048	0.998535	1
ASNA1-201	619	C	2	1	2052	0	0	0	.	2055	0.99854	1
ASNA1-201	424	G	0	2061	2	1	0	0	.	2064	0.998547	1
ASNA1-201	525	G	1	2748	1	2	0	0	.	2752	0.998547	1
ASNA1-201	1059	T	0	0	1	687	0	0	.	688	0.998547	1
ASNA1-201	771	C	4	0	2755	0	0	0	.	2759	0.99855	1
ASNA1-201	118	G	0	1378	0	2	0	0	.	1380	0.998551	1
ASNA1-201	170	C	2	0	1378	0	0	0	.	1380	0.998551	1
ASNA1-201	526	G	3	2765	0	1	0	0	.	2769	0.998555	1
ASNA1-201	909	C	1	1	1385	0	0	0	.	1387	0.998558	1
ASNA1-201	775	C	4	0	2773	0	0	0	.	2777	0.99856	1
ASNA1-201	214	G	0	1387	2	0	0	0	.	1389	0.99856	1
ASNA1-201	925	A	1389	0	2	0	0	0	.	1391	0.998562	1
ASNA1-201	430	T	0	1	2	2090	0	0	.	2093	0.998567	1
ASNA1-201	642	C	1	0	1417	1	0	0	.	1419	0.998591	1
ASNA1-201	807	C	3	0	2136	0	0	0	.	2139	0.998597	1
ASNA1-201	218	T	0	1	1	1428	0	0	.	1430	0.998601	1
ASNA1-201	438	A	2144	1	1	1	0	0	.	2147	0.998603	1
ASNA1-201	345	G	0	2146	0	3	0	0	.	2149	0.998604	1
ASNA1-201	220	T	0	2	0	1443	0	0	.	1445	0.998616	1
ASNA1-201	799	T	0	2	1	2167	0	0	.	2170	0.998618	1
ASNA1-201	338	C	1	0	2174	2	0	0	.	2177	0.998622	1
ASNA1-201	864	G	0	1450	1	1	0	0	.	1452	0.998623	1
ASNA1-201	868	C	2	0	1461	0	0	0	.	1463	0.998633	1
ASNA1-201	860	C	0	1	1462	0	1	0	.	1464	0.998634	1
ASNA1-201	797	G	0	2195	0	3	0	0	.	2198	0.998635	1
ASNA1-201	871	A	1464	0	2	0	0	0	.	1466	0.998636	1
ASNA1-201	840	A	2198	0	1	2	0	0	.	2201	0.998637	1
ASNA1-201	343	G	0	2204	1	2	0	0	.	2207	0.998641	1
ASNA1-201	915	A	1473	1	1	0	0	0	.	1475	0.998644	1
ASNA1-201	744	T	1	1	1	2218	0	0	.	2221	0.998649	1
ASNA1-201	795	C	3	0	2222	0	0	0	.	2225	0.998652	1
ASNA1-201	812	C	1	0	2231	2	0	0	.	2234	0.998657	1
ASNA1-201	641	C	2	0	1490	0	0	0	.	1492	0.99866	1
ASNA1-201	437	C	2	0	2251	1	0	0	.	2254	0.998669	1
ASNA1-201	736	A	2261	1	2	0	0	0	.	2264	0.998675	1
ASNA1-201	595	A	2275	0	3	0	0	0	.	2278	0.998683	1
ASNA1-201	740	A	2284	0	2	1	0	0	.	2287	0.998688	1
ASNA1-201	901	A	1528	2	0	0	0	0	.	1530	0.998693	1
ASNA1-201	792	A	2300	0	3	0	0	0	.	2303	0.998697	1
ASNA1-201	741	A	2306	0	2	1	0	0	.	2309	0.998701	1
ASNA1-201	126	A	1540	0	2	0	0	0	.	1542	0.998703	1
ASNA1-201	659	A	1545	0	2	0	0	0	.	1547	0.998707	1
ASNA1-201	902	C	1	0	1551	1	0	0	.	1553	0.998712	1
ASNA1-201	580	G	0	2351	0	3	0	0	.	2354	0.998726	1
ASNA1-201	481	A	2352	1	2	0	0	0	.	2355	0.998726	1
ASNA1-201	746	C	3	0	2354	0	0	0	.	2357	0.998727	1
ASNA1-201	663	C	2	0	1573	0	0	0	.	1575	0.99873	1
ASNA1-201	788	A	2368	0	3	0	0	0	.	2371	0.998735	1
ASNA1-201	1058	G	0	793	0	1	0	0	.	794	0.998741	1
ASNA1-201	229	C	1	0	1600	1	0	0	.	1602	0.998752	1
ASNA1-201	715	A	2407	0	2	1	0	0	.	2410	0.998755	1
ASNA1-201	1055	C	0	1	803	0	0	0	.	804	0.998756	1
ASNA1-201	542	G	3	2422	0	0	0	0	.	2425	0.998763	1
ASNA1-201	236	C	2	0	1616	0	0	0	.	1618	0.998764	1
ASNA1-201	143	G	0	1627	0	2	0	0	.	1629	0.998772	1
ASNA1-201	633	A	1627	0	1	1	0	0	.	1629	0.998772	1
ASNA1-201	654	A	1631	1	1	0	0	0	.	1633	0.998775	1
ASNA1-201	891	G	2	1631	0	0	0	0	.	1633	0.998775	1
ASNA1-201	309	A	1634	0	2	0	0	0	.	1636	0.998778	1
ASNA1-201	665	G	0	1638	0	2	0	0	.	1640	0.99878	1
ASNA1-201	877	C	2	0	1650	0	0	0	.	1652	0.998789	1
ASNA1-201	97	T	0	1	0	826	0	0	.	827	0.998791	1
ASNA1-201	483	G	1	2489	2	0	0	0	.	2492	0.998796	1
ASNA1-201	635	G	0	1673	0	2	0	0	.	1675	0.998806	1
ASNA1-201	656	C	2	0	1683	0	0	0	.	1685	0.998813	1
ASNA1-201	96	C	1	0	842	0	0	0	.	843	0.998814	1
ASNA1-201	662	C	2	0	1692	0	0	0	.	1694	0.998819	1
ASNA1-201	148	A	1694	1	1	0	0	0	.	1696	0.998821	1
ASNA1-201	496	C	2	1	2562	0	0	0	.	2565	0.99883	1
ASNA1-201	495	T	0	2	1	2565	0	0	.	2568	0.998832	1
ASNA1-201	467	C	2	1	2567	0	0	0	.	2570	0.998833	1
ASNA1-201	785	G	0	2567	0	3	0	0	.	2570	0.998833	1
ASNA1-201	497	G	1	2568	0	2	0	0	.	2571	0.998833	1
ASNA1-201	578	C	2	0	2568	1	0	0	.	2571	0.998833	1
ASNA1-201	1053	G	0	857	0	1	0	0	.	858	0.998834	1
ASNA1-201	690	C	1	0	1716	1	0	0	.	1718	0.998836	1
ASNA1-201	501	G	0	2582	0	3	0	0	.	2585	0.998839	1
ASNA1-201	674	C	1	1	1729	0	0	0	.	1731	0.998845	1
ASNA1-201	523	C	2	1	2601	0	0	0	.	2604	0.998848	1
ASNA1-201	299	A	1738	0	2	0	0	0	.	1740	0.998851	1
ASNA1-201	572	C	1	1	2614	1	0	0	.	2617	0.998854	1
ASNA1-201	1048	C	0	0	880	1	0	0	.	881	0.998865	1
ASNA1-201	527	C	2	0	2646	1	0	0	.	2649	0.998867	1
ASNA1-201	292	A	1765	0	2	0	0	0	.	1767	0.998868	1
ASNA1-201	784	A	2661	0	3	0	0	0	.	2664	0.998874	1
ASNA1-201	1047	C	0	0	887	1	0	0	.	888	0.998874	1
ASNA1-201	153	G	0	1779	1	1	0	0	.	1781	0.998877	1
ASNA1-201	694	C	2	0	1784	0	0	0	.	1786	0.99888	1
ASNA1-201	533	C	1	0	2678	2	0	0	.	2681	0.998881	1
ASNA1-201	693	C	2	0	1786	0	0	0	.	1788	0.998881	1
ASNA1-201	151	G	0	1789	0	2	0	0	.	1791	0.998883	1
ASNA1-201	630	A	1792	0	1	1	0	0	.	1794	0.998885	1
ASNA1-201	685	A	1802	1	1	0	0	0	.	1804	0.998891	1
ASNA1-201	270	A	1804	2	0	0	0	0	.	1806	0.998893	1
ASNA1-201	692	G	1	1806	0	1	0	0	.	1808	0.998894	1
ASNA1-201	534	C	2	0	2718	1	0	0	.	2721	0.998897	1
ASNA1-201	297	A	1823	1	1	0	0	0	.	1825	0.998904	1
ASNA1-201	375	G	0	1835	0	2	0	0	.	1837	0.998911	1
ASNA1-201	286	C	2	0	1841	0	0	0	.	1843	0.998915	1
ASNA1-201	245	C	1	1	1850	0	0	0	.	1852	0.99892	1
ASNA1-201	272	G	0	1853	0	2	0	0	.	1855	0.998922	1
ASNA1-201	254	A	1858	0	1	1	0	0	.	1860	0.998925	1
ASNA1-201	378	G	1	1860	0	1	0	0	.	1862	0.998926	1
ASNA1-201	393	A	1872	0	1	1	0	0	.	1874	0.998933	1
ASNA1-201	302	C	2	0	1874	0	0	0	.	1876	0.998934	1
ASNA1-201	952	T	0	0	1	937	0	0	.	938	0.998934	1
ASNA1-201	406	T	0	2	0	1878	0	0	.	1880	0.998936	1
ASNA1-201	99	A	940	0	1	0	0	0	.	941	0.998937	1
ASNA1-201	779	G	1	2823	1	1	0	0	.	2826	0.998938	1
ASNA1-201	698	C	2	0	1883	0	0	0	.	1885	0.998939	1
ASNA1-201	289	C	1	0	1889	0	1	0	.	1891	0.998942	1
ASNA1-201	268	A	1896	1	1	0	0	0	.	1898	0.998946	1
ASNA1-201	701	C	2	0	1899	0	0	0	.	1901	0.998948	1
ASNA1-201	1038	T	0	1	0	954	0	0	.	955	0.998953	1
ASNA1-201	704	C	1	1	1921	0	0	0	.	1923	0.99896	1
ASNA1-201	158	G	0	1927	0	1	1	0	.	1929	0.998963	1
ASNA1-201	986	G	0	964	0	1	0	0	.	965	0.998964	1
ASNA1-201	284	G	2	1932	0	0	0	0	.	1934	0.998966	1
ASNA1-201	955	A	972	0	1	0	0	0	.	973	0.998972	1
ASNA1-201	976	T	1	0	0	972	0	0	.	973	0.998972	1
ASNA1-201	373	A	1948	1	1	0	0	0	.	1950	0.998974	1
ASNA1-201	372	G	1	1949	0	1	0	0	.	1951	0.998975	1
ASNA1-201	1041	A	977	0	1	0	0	0	.	978	0.998978	1
ASNA1-201	1014	T	1	0	0	982	0	0	.	983	0.998983	1
ASNA1-201	101	C	1	0	983	0	0	0	.	984	0.998984	1
ASNA1-201	413	G	1	1966	0	1	0	0	.	1968	0.998984	1
ASNA1-201	956	C	0	0	987	1	0	0	.	988	0.998988	1
ASNA1-201	1017	T	0	0	1	991	0	0	.	992	0.998992	1
ASNA1-201	416	G	0	2005	1	1	0	0	.	2007	0.999003	1
ASNA1-201	950	C	1	0	1004	0	0	0	.	1005	0.999005	1
ASNA1-201	188	A	1006	0	1	0	0	0	.	1007	0.999007	1
ASNA1-201	609	C	2	0	2012	0	0	0	.	2014	0.999007	1
ASNA1-201	981	C	1	0	1007	0	0	0	.	1008	0.999008	1
ASNA1-201	969	C	1	0	1009	0	0	0	.	1010	0.99901	1
ASNA1-201	334	C	2	0	2028	0	0	0	.	2030	0.999015	1
ASNA1-201	616	T	0	1	1	2035	0	0	.	2037	0.999018	1
ASNA1-201	318	G	1	2042	0	1	0	0	.	2044	0.999022	1
ASNA1-201	104	C	0	0	1031	1	0	0	.	1032	0.999031	1
ASNA1-201	384	A	2075	0	2	0	0	0	.	2077	0.999037	1
ASNA1-201	356	G	1	2087	0	1	0	0	.	2089	0.999043	1
ASNA1-201	385	T	0	1	1	2094	0	0	.	2096	0.999046	1
ASNA1-201	831	C	2	0	2111	0	0	0	.	2113	0.999053	1
ASNA1-201	1034	G	0	1057	0	1	0	0	.	1058	0.999055	1
ASNA1-201	1025	C	1	0	1058	0	0	0	.	1059	0.999056	1
ASNA1-201	731	T	0	1	1	2125	0	0	.	2127	0.99906	1
ASNA1-201	829	C	1	1	2136	0	0	0	.	2138	0.999065	1
ASNA1-201	342	G	0	2146	0	2	0	0	.	2148	0.999069	1
ASNA1-201	718	A	2155	0	1	1	0	0	.	2157	0.999073	1
ASNA1-201	1005	G	0	1078	0	1	0	0	.	1079	0.999073	1
ASNA1-201	803	G	0	2159	1	1	0	0	.	2161	0.999075	1
ASNA1-201	433	C	2	0	2164	0	0	0	.	2166	0.999077	1
ASNA1-201	341	G	0	2166	0	2	0	0	.	2168	0.999077	1
ASNA1-201	730	C	2	0	2169	0	0	0	.	2171	0.999079	1
ASNA1-201	202	A	1090	0	0	1	0	0	.	1091	0.999083	1
ASNA1-201	978	C	0	0	1096	1	0	0	.	1097	0.999088	1
ASNA1-201	805	A	2193	0	2	0	0	0	.	2195	0.999089	1
ASNA1-201	432	C	0	2	2196	0	0	0	.	2198	0.99909	1
ASNA1-201	600	C	1	1	2210	0	0	0	.	2212	0.999096	1
ASNA1-201	200	C	1	0	1113	0	0	0	.	1114	0.999102	1
ASNA1-201	183	C	1	0	1114	0	0	0	.	1115	0.999103	1
ASNA1-201	811	C	0	0	2240	2	0	0	.	2242	0.999108	1
ASNA1-201	839	A	2243	1	1	0	0	0	.	2245	0.999109	1
ASNA1-201	735	C	2	0	2251	0	0	0	.	2253	0.999112	1
ASNA1-201	818	C	2	0	2271	0	0	0	.	2273	0.99912	1
ASNA1-201	732	G	0	2276	1	1	0	0	.	2278	0.999122	1
ASNA1-201	442	A	2278	0	2	0	0	0	.	2280	0.999123	1
ASNA1-201	998	A	1139	0	0	1	0	0	.	1140	0.999123	1
ASNA1-201	761	T	0	1	1	2284	0	0	.	2286	0.999125	1
ASNA1-201	179	C	1	0	1150	0	0	0	.	1151	0.999131	1
ASNA1-201	752	C	2	0	2301	0	0	0	.	2303	0.999132	1
ASNA1-201	441	G	0	2306	0	2	0	0	.	2308	0.999133	1
ASNA1-201	748	T	0	2	0	2311	0	0	.	2313	0.999135	1
ASNA1-201	724	A	2313	0	2	0	0	0	.	2315	0.999136	1
ASNA1-201	1009	A	1158	0	1	0	0	0	.	1159	0.999137	1
ASNA1-201	787	C	2	0	2327	0	0	0	.	2329	0.999141	1
ASNA1-201	182	C	1	0	1166	0	0	0	.	1167	0.999143	1
ASNA1-201	947	A	1169	0	1	0	0	0	.	1170	0.999145	1
ASNA1-201	594	A	2341	1	1	0	0	0	.	2343	0.999146	1
ASNA1-201	820	A	2342	0	2	0	0	0	.	2344	0.999147	1
ASNA1-201	540	C	2	0	2358	0	0	0	.	2360	0.999153	1
ASNA1-201	181	G	1	1184	0	0	0	0	.	1185	0.999156	1
ASNA1-201	822	A	2385	0	2	0	0	0	.	2387	0.999162	1
ASNA1-201	197	C	1	0	1196	0	0	0	.	1197	0.999165	1
ASNA1-201	543	C	2	0	2397	0	0	0	.	2399	0.999166	1
ASNA1-201	198	T	0	1	0	1206	0	0	.	1207	0.999171	1
ASNA1-201	758	C	1	0	2415	1	0	0	.	2417	0.999173	1
ASNA1-201	757	G	0	2433	0	2	0	0	.	2435	0.999179	1
ASNA1-201	204	G	1	1221	0	0	0	0	.	1222	0.999182	1
ASNA1-201	457	A	2446	2	0	0	0	0	.	2448	0.999183	1
ASNA1-201	550	T	0	2	0	2446	0	0	.	2448	0.999183	1
ASNA1-201	579	C	0	0	2457	2	0	0	.	2459	0.999187	1
ASNA1-201	790	A	2482	0	2	0	0	0	.	2484	0.999195	1
ASNA1-201	944	T	0	1	0	1245	0	0	.	1246	0.999197	1
ASNA1-201	486	A	2498	1	1	0	0	0	.	2500	0.9992	1
ASNA1-201	468	A	2504	0	2	0	0	0	.	2506	0.999202	1
ASNA1-201	568	G	0	2547	0	2	0	0	.	2549	0.999215	1
ASNA1-201	551	C	2	0	2567	0	0	0	.	2569	0.999221	1
ASNA1-201	570	G	1	2570	1	0	0	0	.	2572	0.999222	1
ASNA1-201	535	T	0	1	1	2593	0	0	.	2595	0.999229	1
ASNA1-201	943	A	1297	0	0	1	0	0	.	1298	0.99923	1
ASNA1-201	937	A	1302	0	1	0	0	0	.	1303	0.999233	1
ASNA1-201	585	A	2617	0	2	0	0	0	.	2619	0.999236	1
ASNA1-201	772	T	1	1	0	2629	0	0	.	2631	0.99924	1
ASNA1-201	206	G	0	1319	0	1	0	0	.	1320	0.999242	1
ASNA1-201	172	G	0	1333	1	0	0	0	.	1334	0.99925	1
ASNA1-201	219	C	1	0	1333	0	0	0	.	1334	0.99925	1
ASNA1-201	538	G	0	2674	1	1	0	0	.	2676	0.999253	1
ASNA1-201	939	C	1	0	1337	0	0	0	.	1338	0.999253	1
ASNA1-201	928	A	1345	0	0	1	0	0	.	1346	0.999257	1
ASNA1-201	930	A	1351	1	0	0	0	0	.	1352	0.99926	1
ASNA1-201	225	A	1356	0	1	0	0	0	.	1357	0.999263	1
ASNA1-201	767	G	0	2715	1	1	0	0	.	2717	0.999264	1
ASNA1-201	536	G	0	2743	0	2	0	0	.	2745	0.999271	1
ASNA1-201	922	T	0	1	0	1377	0	0	.	1378	0.999274	1
ASNA1-201	212	G	1	1378	0	0	0	0	.	1379	0.999275	1
ASNA1-201	780	T	0	2	0	2765	0	0	.	2767	0.999277	1
ASNA1-201	117	C	1	0	1389	0	0	0	.	1390	0.999281	1
ASNA1-201	919	A	1398	0	1	0	0	0	.	1399	0.999285	1
ASNA1-201	854	C	1	0	1405	0	0	0	.	1406	0.999289	1
ASNA1-201	857	C	1	0	1417	0	0	0	.	1418	0.999295	1
ASNA1-201	862	C	0	0	1421	1	0	0	.	1422	0.999297	1
ASNA1-201	532	C	1	1	2843	0	0	0	.	2845	0.999297	1
ASNA1-201	162	A	1428	1	0	0	0	0	.	1429	0.9993	1
ASNA1-201	863	C	1	0	1429	0	0	0	.	1430	0.999301	1
ASNA1-201	223	T	0	1	0	1436	0	0	.	1437	0.999304	1
ASNA1-201	916	A	1443	0	0	1	0	0	.	1444	0.999307	1
ASNA1-201	127	A	1453	1	0	0	0	0	.	1454	0.999312	1
ASNA1-201	228	T	0	1	0	1466	0	0	.	1467	0.999318	1
ASNA1-201	846	A	1468	0	1	0	0	0	.	1469	0.999319	1
ASNA1-201	226	T	0	1	0	1473	0	0	.	1474	0.999322	1
ASNA1-201	848	C	1	0	1476	0	0	0	.	1477	0.999323	1
ASNA1-201	913	C	0	0	1476	1	0	0	.	1477	0.999323	1
ASNA1-201	866	C	1	0	1502	0	0	0	.	1503	0.999335	1
ASNA1-201	164	G	0	1505	0	1	0	0	.	1506	0.999336	1
ASNA1-201	903	A	1507	0	1	0	0	0	.	1508	0.999337	1
ASNA1-201	668	G	0	1512	0	1	0	0	.	1513	0.999339	1
ASNA1-201	897	C	1	0	1514	0	0	0	.	1515	0.99934	1
ASNA1-201	221	G	1	1523	0	0	0	0	.	1524	0.999344	1
ASNA1-201	845	C	1	0	1527	0	0	0	.	1528	0.999346	1
ASNA1-201	135	T	0	1	0	1556	0	0	.	1557	0.999358	1
ASNA1-201	141	G	1	1564	0	0	0	0	.	1565	0.999361	1
ASNA1-201	650	C	0	0	1568	1	0	0	.	1569	0.999363	1
ASNA1-201	875	G	0	1570	0	1	0	0	.	1571	0.999363	1
ASNA1-201	895	C	1	0	1573	0	0	0	.	1574	0.999365	1
ASNA1-201	640	G	0	1587	0	1	0	0	.	1588	0.99937	1
ASNA1-201	658	C	1	0	1599	0	0	0	.	1600	0.999375	1
ASNA1-201	147	A	1614	0	1	0	0	0	.	1615	0.999381	1
ASNA1-201	680	G	0	1621	0	1	0	0	.	1622	0.999383	1
ASNA1-201	671	C	0	1	1624	0	0	0	.	1625	0.999385	1
ASNA1-201	140	C	1	0	1626	0	0	0	.	1627	0.999385	1
ASNA1-201	651	A	1632	0	1	0	0	0	.	1633	0.999388	1
ASNA1-201	676	A	1637	0	1	0	0	0	.	1638	0.999389	1
ASNA1-201	678	C	1	0	1668	0	0	0	.	1669	0.999401	1
ASNA1-201	841	T	1	0	0	1714	0	0	.	1715	0.999417	1
ASNA1-201	684	G	1	1716	0	0	0	0	.	1717	0.999418	1
ASNA1-201	686	G	0	1730	1	0	0	0	.	1731	0.999422	1
ASNA1-201	240	G	0	1733	1	0	0	0	.	1734	0.999423	1
ASNA1-201	271	A	1776	0	1	0	0	0	.	1777	0.999437	1
ASNA1-201	303	T	0	1	0	1776	0	0	.	1777	0.999437	1
ASNA1-201	321	A	1787	0	0	1	0	0	.	1788	0.999441	1
ASNA1-201	249	A	1794	0	1	0	0	0	.	1795	0.999443	1
ASNA1-201	403	A	1838	0	1	0	0	0	.	1839	0.999456	1
ASNA1-201	305	T	0	1	0	1840	0	0	.	1841	0.999457	1
ASNA1-201	293	G	0	1850	0	1	0	0	.	1851	0.99946	1
ASNA1-201	702	C	1	0	1867	0	0	0	.	1868	0.999465	1
ASNA1-201	707	A	1868	1	0	0	0	0	.	1869	0.999465	1
ASNA1-201	154	G	0	1871	0	1	0	0	.	1872	0.999466	1
ASNA1-201	156	G	1	1874	0	0	0	0	.	1875	0.999467	1
ASNA1-201	283	T	1	0	0	1874	0	0	.	1875	0.999467	1
ASNA1-201	248	C	1	0	1875	0	0	0	.	1876	0.999467	1
ASNA1-201	628	G	0	1884	0	1	0	0	.	1885	0.999469	1
ASNA1-201	279	A	1888	0	1	0	0	0	.	1889	0.999471	1
ASNA1-201	282	G	0	1903	0	1	0	0	.	1904	0.999475	1
ASNA1-201	400	A	1909	1	0	0	0	0	.	1910	0.999476	1
ASNA1-201	253	C	1	0	1911	0	0	0	.	1912	0.999477	1
ASNA1-201	399	A	1929	0	0	1	0	0	.	1930	0.999482	1
ASNA1-201	250	T	0	1	0	1934	0	0	.	1935	0.999483	1
ASNA1-201	264	G	0	1947	0	1	0	0	.	1948	0.999487	1
ASNA1-201	387	C	0	0	1970	1	0	0	.	1971	0.999493	1
ASNA1-201	414	G	1	1988	0	0	0	0	.	1989	0.999497	1
ASNA1-201	263	T	1	0	0	1993	0	0	.	1994	0.999498	1
ASNA1-201	269	G	0	2000	0	1	0	0	.	2001	0.9995	1
ASNA1-201	276	T	0	0	1	2010	0	0	.	2011	0.999503	1
ASNA1-201	262	T	0	1	0	2014	0	0	.	2015	0.999504	1
ASNA1-201	711	A	2016	0	1	0	0	0	.	2017	0.999504	1
ASNA1-201	617	C	1	0	2058	0	0	0	.	2059	0.999514	1
ASNA1-201	350	G	0	2061	0	1	0	0	.	2062	0.999515	1
ASNA1-201	428	A	2119	0	1	0	0	0	.	2120	0.999528	1
ASNA1-201	806	G	0	2139	0	1	0	0	.	2140	0.999533	1
ASNA1-201	801	C	1	0	2165	0	0	0	.	2166	0.999538	1
ASNA1-201	434	C	0	1	2170	0	0	0	.	2171	0.999539	1
ASNA1-201	601	A	2194	0	1	0	0	0	.	2195	0.999544	1
ASNA1-201	827	C	0	1	2201	0	0	0	.	2202	0.999546	1
ASNA1-201	802	A	2220	0	1	0	0	0	.	2221	0.99955	1
ASNA1-201	834	A	2235	0	1	0	0	0	.	2236	0.999553	1
ASNA1-201	813	A	2246	1	0	0	0	0	.	2247	0.999555	1
ASNA1-201	814	A	2257	0	0	1	0	0	.	2258	0.999557	1
ASNA1-201	589	A	2284	0	1	0	0	0	.	2285	0.999562	1
ASNA1-201	837	A	2285	0	1	0	0	0	.	2286	0.999563	1
ASNA1-201	815	G	0	2292	0	1	0	0	.	2293	0.999564	1
ASNA1-201	549	T	0	1	0	2333	0	0	.	2334	0.999572	1
ASNA1-201	759	A	2351	0	1	0	0	0	.	2352	0.999575	1
ASNA1-201	745	T	0	1	0	2386	0	0	.	2387	0.999581	1
ASNA1-201	753	G	0	2409	0	1	0	0	.	2410	0.999585	1
ASNA1-201	482	G	1	2460	0	0	0	0	.	2461	0.999594	1
ASNA1-201	582	C	0	0	2520	1	0	0	.	2521	0.999603	1
ASNA1-201	573	C	1	0	2545	0	0	0	.	2546	0.999607	1
ASNA1-201	552	C	1	0	2558	0	0	0	.	2559	0.999609	1
ASNA1-201	530	C	1	0	2682	0	0	0	.	2683	0.999627	1
ASNA1-201	777	C	1	0	2696	0	0	0	.	2697	0.999629	1
ASNA1-201	510	G	1	2709	0	0	0	0	.	2710	0.999631	1
ASNA1-201	509	T	0	0	1	2734	0	0	.	2735	0.999634	1
ASNA1-201	98	T	0	0	0	945	0	0	.	945	1	1
ASNA1-201	102	A	921	0	0	0	0	0	.	921	1	1
ASNA1-201	103	A	969	0	0	0	0	0	.	969	1	1
ASNA1-201	109	T	0	0	0	1266	0	0	.	1266	1	1
ASNA1-201	111	G	0	1304	0	0	0	0	.	1304	1	1
ASNA1-201	123	C	0	0	1495	0	0	0	.	1495	1	1
ASNA1-201	125	G	0	1548	0	0	0	0	.	1548	1	1
ASNA1-201	128	G	0	1576	0	0	0	0	.	1576	1	1
ASNA1-201	131	G	0	1585	0	0	0	0	.	1585	1	1
ASNA1-201	136	T	0	0	0	1589	0	0	.	1589	1	1
ASNA1-201	142	G	0	1582	0	0	0	0	.	1582	1	1
ASNA1-201	144	G	0	1661	0	0	0	0	.	1661	1	1
ASNA1-201	145	G	0	1669	0	0	0	0	.	1669	1	1
ASNA1-201	149	G	0	1775	0	0	0	0	.	1775	1	1
ASNA1-201	178	G	0	1290	0	0	0	0	.	1290	1	1
ASNA1-201	184	T	0	0	0	1113	0	0	.	1113	1	1
ASNA1-201	185	G	0	1149	0	0	0	0	.	1149	1	1
ASNA1-201	189	G	0	1177	0	0	0	0	.	1177	1	1
ASNA1-201	199	C	0	0	1195	0	0	0	.	1195	1	1
ASNA1-201	201	A	1077	0	0	0	0	0	.	1077	1	1
ASNA1-201	203	G	0	1191	0	0	0	0	.	1191	1	1
ASNA1-201	205	G	0	1226	0	0	0	0	.	1226	1	1
ASNA1-201	209	T	0	0	0	1218	0	0	.	1218	1	1
ASNA1-201	210	G	0	1320	0	0	0	0	.	1320	1	1
ASNA1-201	234	G	0	1550	0	0	0	0	.	1550	1	1
ASNA1-201	278	A	1934	0	0	0	0	0	.	1934	1	1
ASNA1-201	281	G	0	1906	0	0	0	0	.	1906	1	1
ASNA1-201	298	A	1784	0	0	0	0	0	.	1784	1	1
ASNA1-201	300	G	0	2006	0	0	0	0	.	2006	1	1
ASNA1-201	347	G	0	2156	0	0	0	0	.	2156	1	1
ASNA1-201	402	A	1906	0	0	0	0	0	.	1906	1	1
ASNA1-201	404	G	0	1904	0	0	0	0	.	1904	1	1
ASNA1-201	420	A	2104	0	0	0	0	0	.	2104	1	1
ASNA1-201	429	T	0	0	0	2005	0	0	.	2005	1	1
ASNA1-201	458	T	0	0	0	2386	0	0	.	2386	1	1
ASNA1-201	472	G	0	2564	0	0	0	0	.	2564	1	1
ASNA1-201	479	G	0	2559	0	0	0	0	.	2559	1	1
ASNA1-201	506	A	2671	0	0	0	0	0	.	2671	1	1
ASNA1-201	557	C	0	0	2365	0	0	0	.	2365	1	1
ASNA1-201	666	C	0	0	1651	0	0	0	.	1651	1	1
ASNA1-201	695	C	0	0	1817	0	0	0	.	1817	1	1
ASNA1-201	699	A	1909	0	0	0	0	0	.	1909	1	1
ASNA1-201	710	C	0	0	2047	0	0	0	.	2047	1	1
ASNA1-201	821	G	0	2397	0	0	0	0	.	2397	1	1
ASNA1-201	835	A	2339	0	0	0	0	0	.	2339	1	1
ASNA1-201	852	C	0	0	1458	0	0	0	.	1458	1	1
ASNA1-201	867	C	0	0	1449	0	0	0	.	1449	1	1
ASNA1-201	876	C	0	0	1702	0	0	0	.	1702	1	1
ASNA1-201	883	A	1732	0	0	0	0	0	.	1732	1	1
ASNA1-201	896	C	0	0	1497	0	0	0	.	1497	1	1
ASNA1-201	904	A	1500	0	0	0	0	0	.	1500	1	1
ASNA1-201	927	C	0	0	1307	0	0	0	.	1307	1	1
ASNA1-201	949	A	1038	0	0	0	0	0	.	1038	1	1
ASNA1-201	953	C	0	0	1027	0	0	0	.	1027	1	1
ASNA1-201	954	C	0	0	1001	0	0	0	.	1001	1	1
ASNA1-201	960	G	0	920	0	0	0	0	.	920	1	1
ASNA1-201	963	A	959	0	0	0	0	0	.	959	1	1
ASNA1-201	966	C	0	0	962	0	0	0	.	962	1	1
ASNA1-201	970	C	0	0	1054	0	0	0	.	1054	1	1
ASNA1-201	989	G	0	1070	0	0	0	0	.	1070	1	1
ASNA1-201	1010	C	0	0	1160	0	0	0	.	1160	1	1
ASNA1-201	1012	C	0	0	1069	0	0	0	.	1069	1	1
ASNA1-201	1016	C	0	0	1010	0	0	0	.	1010	1	1
ASNA1-201	1018	C	0	0	1017	0	0	0	.	1017	1	1
ASNA1-201	1019	G	0	1018	0	0	0	0	.	1018	1	1
ASNA1-201	1021	C	0	0	1067	0	0	0	.	1067	1	1
ASNA1-201	1023	C	0	0	1032	0	0	0	.	1032	1	1
ASNA1-201	1026	C	0	0	1060	0	0	0	.	1060	1	1
ASNA1-201	1029	C	0	0	1045	0	0	0	.	1045	1	1
ASNA1-201	1035	C	0	0	1014	0	0	0	.	1014	1	1
ASNA1-201	1037	C	0	0	986	0	0	0	.	986	1	1
ASNA1-201	1039	A	993	0	0	0	0	0	.	993	1	1
ASNA1-201	1040	C	0	0	998	0	0	0	.	998	1	1
ASNA1-201	1042	A	919	0	0	0	0	0	.	919	1	1
ASNA1-201	1045	C	0	0	891	0	0	0	.	891	1	1
ASNA1-201	1046	C	0	0	886	0	0	0	.	886	1	1
ASNA1-201	1057	A	790	0	0	0	0	0	.	790	1	1
ASNA1-201	1061	G	0	628	0	0	0	0	.	628	1	1
ASNA1-201	1062	C	0	0	639	0	0	0	.	639	1	1
ASNA1-201	1212	T	0	1	0	7	0	0	.	8	0.875	0
ASNA1-201	1115	A	21	0	2	0	0	0	.	23	0.913043	0
ASNA1-201	1163	G	0	29	0	2	0	0	.	31	0.935484	0
ASNA1-201	1206	T	1	0	0	15	0	0	.	16	0.9375	0
ASNA1-201	1125	G	0	29	0	1	0	0	.	30	0.966667	0
ASNA1-201	1172	G	0	30	0	1	0	0	.	31	0.967742	0
ASNA1-201	1185	G	0	37	0	1	0	0	.	38	0.973684	0
ASNA1-201	88	A	384	0	5	0	0	0	.	389	0.987147	0
ASNA1-201	1102	C	2	0	174	0	0	0	.	176	0.988636	0
ASNA1-201	1099	A	191	2	0	0	0	0	.	193	0.989637	0
ASNA1-201	1100	C	0	0	197	2	0	0	.	199	0.98995	0
ASNA1-201	1066	G	1	485	0	2	1	0	.	489	0.99182	0
ASNA1-201	1106	A	129	0	1	0	0	0	.	130	0.992308	0
ASNA1-201	1090	T	0	0	2	297	0	0	.	299	0.993311	0
ASNA1-201	1091	T	1	0	1	310	0	0	.	312	0.99359	0
ASNA1-201	1092	C	1	0	315	0	1	0	.	317	0.993691	0
ASNA1-201	1084	T	0	2	0	332	0	0	.	334	0.994012	0
ASNA1-201	1068	T	0	2	0	428	0	0	.	430	0.995349	0
ASNA1-201	1095	A	289	0	1	0	0	0	.	290	0.996552	0
ASNA1-201	1093	A	307	0	0	0	1	0	.	308	0.996753	0
ASNA1-201	1088	A	331	0	0	0	0	1	T	332	0.996988	0
ASNA1-201	1087	C	0	1	332	0	0	0	.	333	0.996997	0
ASNA1-201	1082	G	0	352	0	1	0	0	.	353	0.997167	0
ASNA1-201	1076	C	1	0	389	0	0	0	.	390	0.997436	0
ASNA1-201	1075	C	0	0	410	1	0	0	.	411	0.997567	0
ASNA1-201	1072	A	439	0	1	0	0	0	.	440	0.997727	0
ASNA1-201	1071	C	0	0	446	1	0	0	.	447	0.997763	0
ASNA1-201	1069	G	0	447	0	1	0	0	.	448	0.997768	0
ASNA1-201	89	G	0	497	1	0	0	0	.	498	0.997992	0
ASNA1-201	86	G	0	2	0	0	0	0	.	2	1	0
ASNA1-201	87	G	0	21	0	0	0	0	.	21	1	0
ASNA1-201	1067	C	0	0	473	0	0	0	.	473	1	0
ASNA1-201	1070	C	0	0	447	0	0	0	.	447	1	0
ASNA1-201	1073	G	0	447	0	0	0	0	.	447	1	0
ASNA1-201	1074	C	0	0	425	0	0	0	.	425	1	0
ASNA1-201	1077	C	0	0	386	0	0	0	.	386	1	0
ASNA1-201	1078	A	381	0	0	0	0	0	.	381	1	0
ASNA1-201	1079	A	373	0	0	0	0	0	.	373	1	0
ASNA1-201	1080	C	0	0	389	0	0	0	.	389	1	0
ASNA1-201	1081	C	0	0	359	0	0	0	.	359	1	0
ASNA1-201	1083	C	0	0	346	0	0	0	.	346	1	0
ASNA1-201	1085	G	0	345	0	0	0	0	.	345	1	0
ASNA1-201	1086	C	0	0	340	0	0	0	.	340	1	0
ASNA1-201	1089	T	0	0	0	307	0	0	.	307	1	0
ASNA1-201	1094	C	0	0	289	0	0	0	.	289	1	0
ASNA1-201	1096	C	0	0	213	0	0	0	.	213	1	0
ASNA1-201	1097	T	0	0	0	209	0	0	.	209	1	0
ASNA1-201	1098	C	0	0	212	0	0	0	.	212	1	0
ASNA1-201	1101	C	0	0	194	0	0	0	.	194	1	0
ASNA1-201	1103	T	0	0	0	159	0	0	.	159	1	0
ASNA1-201	1104	C	0	0	142	0	0	0	.	142	1	0
ASNA1-201	1105	C	0	0	143	0	0	0	.	143	1	0
ASNA1-201	1107	C	0	0	110	0	0	0	.	110	1	0
ASNA1-201	1108	C	0	0	55	0	0	0	.	55	1	0
ASNA1-201	1109	C	0	0	41	0	0	0	.	41	1	0
ASNA1-201	1110	T	0	0	0	37	0	0	.	37	1	0
ASNA1-201	1111	C	0	0	41	0	0	0	.	41	1	0
ASNA1-201	1112	C	0	0	29	0	0	0	.	29	1	0
ASNA1-201	1113	C	0	0	30	0	0	0	.	30	1	0
ASNA1-201	1114	C	0	0	23	0	0	0	.	23	1	0
ASNA1-201	1116	C	0	0	25	0	0	0	.	25	1	0
ASNA1-201	1117	C	0	0	18	0	0	0	.	18	1	0
ASNA1-201	1118	C	0	0	23	0	0	0	.	23	1	0
ASNA1-201	1119	C	0	0	27	0	0	0	.	27	1	0
ASNA1-201	1120	C	0	0	26	0	0	0	.	26	1	0
ASNA1-201	1121	T	0	0	0	16	0	0	.	16	1	0
ASNA1-201	1122	C	0	0	23	0	0	0	.	23	1	0
ASNA1-201	1123	G	0	26	0	0	0	0	.	26	1	0
ASNA1-201	1124	G	0	31	0	0	0	0	.	31	1	0
ASNA1-201	1126	G	0	30	0	0	0	0	.	30	1	0
ASNA1-201	1127	C	0	0	27	0	0	0	.	27	1	0
ASNA1-201	1128	A	27	0	0	0	0	0	.	27	1	0
ASNA1-201	1129	G	0	31	0	0	0	0	.	31	1	0
ASNA1-201	1130	A	30	0	0	0	0	0	.	30	1	0
ASNA1-201	1131	G	0	30	0	0	0	0	.	30	1	0
ASNA1-201	1132	T	0	0	0	23	0	0	.	23	1	0
ASNA1-201	1133	T	0	0	0	29	0	0	.	29	1	0
ASNA1-201	1134	T	0	0	0	28	0	0	.	28	1	0
ASNA1-201	1135	G	0	31	0	0	0	0	.	31	1	0
ASNA1-201	1136	C	0	0	35	0	0	0	.	35	1	0
ASNA1-201	1137	A	30	0	0	0	0	0	.	30	1	0
ASNA1-201	1138	C	0	0	30	0	0	0	.	30	1	0
ASNA1-201	1139	A	31	0	0	0	0	0	.	31	1	0
ASNA1-201	1140	A	28	0	0	0	0	0	.	28	1	0
ASNA1-201	1141	A	29	0	0	0	0	0	.	29	1	0
ASNA1-201	1142	G	0	27	0	0	0	0	.	27	1	0
ASNA1-201	1143	T	0	0	0	23	0	0	.	23	1	0
ASNA1-201	1144	C	0	0	30	0	0	0	.	30	1	0
ASNA1-201	1145	C	0	0	30	0	0	0	.	30	1	0
ASNA1-201	1146	C	0	0	29	0	0	0	.	29	1	0
ASNA1-201	1147	C	0	0	32	0	0	0	.	32	1	0
ASNA1-201	1148	C	0	0	31	0	0	0	.	31	1	0
ASNA1-201	1149	C	0	0	34	0	0	0	.	34	1	0
ASNA1-201	1150	C	0	0	36	0	0	0	.	36	1	0
ASNA1-201	1151	A	37	0	0	0	0	0	.	37	1	0
ASNA1-201	1152	T	0	0	0	29	0	0	.	29	1	0
ASNA1-201	1153	A	39	0	0	0	0	0	.	39	1	0
ASNA1-201	1154	A	39	0	0	0	0	0	.	39	1	0
ASNA1-201	1155	T	0	0	0	38	0	0	.	38	1	0
ASNA1-201	1156	A	39	0	0	0	0	0	.	39	1	0
ASNA1-201	1157	C	0	0	36	0	0	0	.	36	1	0
ASNA1-201	1158	A	31	0	0	0	0	0	.	31	1	0
ASNA1-201	1159	G	0	32	0	0	0	0	.	32	1	0
ASNA1-201	1160	G	0	36	0	0	0	0	.	36	1	0
ASNA1-201	1161	G	0	33	0	0	0	0	.	33	1	0
ASNA1-201	1162	G	0	35	0	0	0	0	.	35	1	0
ASNA1-201	1164	A	27	0	0	0	0	0	.	27	1	0
ASNA1-201	1165	G	0	34	0	0	0	0	.	34	1	0
ASNA1-201	1166	C	0	0	32	0	0	0	.	32	1	0
ASNA1-201	1167	C	0	0	30	0	0	0	.	30	1	0
ASNA1-201	1168	A	34	0	0	0	0	0	.	34	1	0
ASNA1-201	1169	C	0	0	31	0	0	0	.	31	1	0
ASNA1-201	1170	T	0	0	0	37	0	0	.	37	1	0
ASNA1-201	1171	T	0	0	0	35	0	0	.	35	1	0
ASNA1-201	1173	G	0	32	0	0	0	0	.	32	1	0
ASNA1-201	1174	G	0	32	0	0	0	0	.	32	1	0
ASNA1-201	1175	C	0	0	33	0	0	0	.	33	1	0
ASNA1-201	1176	A	29	0	0	0	0	0	.	29	1	0
ASNA1-201	1177	G	0	35	0	0	0	0	.	35	1	0
ASNA1-201	1178	G	0	34	0	0	0	0	.	34	1	0
ASNA1-201	1179	A	29	0	0	0	0	0	.	29	1	0
ASNA1-201	1180	G	0	35	0	0	0	0	.	35	1	0
ASNA1-201	1181	G	0	35	0	0	0	0	.	35	1	0
ASNA1-201	1182	C	0	0	32	0	0	0	.	32	1	0
ASNA1-201	1183	A	32	0	0	0	0	0	.	32	1	0
ASNA1-201	1184	G	0	39	0	0	0	0	.	39	1	0
ASNA1-201	1186	G	0	37	0	0	0	0	.	37	1	0
ASNA1-201	1187	A	30	0	0	0	0	0	.	30	1	0
ASNA1-201	1188	G	0	34	0	0	0	0	.	34	1	0
ASNA1-201	1189	G	0	32	0	0	0	0	.	32	1	0
ASNA1-201	1190	G	0	27	0	0	0	0	.	27	1	0
ASNA1-201	1191	G	0	27	0	0	0	0	.	27	1	0
ASNA1-201	1192	T	0	0	0	24	0	0	.	24	1	0
ASNA1-201	1193	C	0	0	30	0	0	0	.	30	1	0
ASNA1-201	1194	C	0	0	27	0	0	0	.	27	1	0
ASNA1-201	1195	A	27	0	0	0	0	0	.	27	1	0
ASNA1-201	1196	T	0	0	0	26	0	0	.	26	1	0
ASNA1-201	1197	T	0	0	0	27	0	0	.	27	1	0
ASNA1-201	1198	C	0	0	26	0	0	0	.	26	1	0
ASNA1-201	1199	C	0	0	22	0	0	0	.	22	1	0
ASNA1-201	1200	C	0	0	24	0	0	0	.	24	1	0
ASNA1-201	1201	C	0	0	19	0	0	0	.	19	1	0
ASNA1-201	1202	C	0	0	19	0	0	0	.	19	1	0
ASNA1-201	1203	T	0	0	0	17	0	0	.	17	1	0
ASNA1-201	1204	G	0	19	0	0	0	0	.	19	1	0
ASNA1-201	1205	G	0	19	0	0	0	0	.	19	1	0
ASNA1-201	1207	G	0	16	0	0	0	0	.	16	1	0
ASNA1-201	1208	G	0	12	0	0	0	0	.	12	1	0
ASNA1-201	1209	G	0	13	0	0	0	0	.	13	1	0
ASNA1-201	1210	G	0	14	0	0	0	0	.	14	1	0
ASNA1-201	1211	C	0	0	8	0	0	0	.	8	1	0
ASNA1-201	1213	G	0	7	0	0	0	0	.	7	1	0
ASNA1-201	1214	G	0	8	0	0	0	0	.	8	1	0
ASNA1-201	1215	T	0	0	0	6	0	0	.	6	1	0
ASNA1-201	1216	G	0	6	0	0	0	0	.	6	1	0
ASNA1-201	1217	G	0	6	0	0	0	0	.	6	1	0
ASNA1-201	1218	G	0	6	0	0	0	0	.	6	1	0
ASNA1-201	1219	G	0	6	0	0	0	0	.	6	1	0
ASNA1-201	1220	A	5	0	0	0	0	0	.	5	1	0
ASNA1-201	1221	G	0	5	0	0	0	0	.	5	1	0
ASNA1-201	1222	C	0	0	4	0	0	0	.	4	1	0
ASNA1-201	1223	T	0	0	0	4	0	0	.	4	1	0
ASNA1-201	1224	G	0	4	0	0	0	0	.	4	1	0
ASNA1-201	1225	T	0	0	0	3	0	0	.	3	1	0
ASNA1-201	1226	A	3	0	0	0	0	0	.	3	1	0
ASNA1-201	1227	G	0	1	0	0	0	0	.	1	1	0
